# Supplementary material for: Epigenetic insights into GABAergic development in Dravet Syndrome iPSC and therapeutic implications
Source: eLife. 2024 Aug 27;12:RP92599. doi: 10.7554/eLife.92599 (PMC11349296; doi:10.7554/eLife.92599)
Supplement: Supplementary file 1. — Source data for Figure 1 and Figure 1—figure supplements 1–3. [file elife-92599-supp1.xlsx]

## Sheet: Supplementary File 1
Cluster	Peak Names	Control_d0	Control_d19	Control_d35	Control_d65	MEM.SHIP	Annotation	Genes
cluster_1	chr1_100949387_100950214	13.5871319690941	4.03012303381446	5.62383184591899	3.09780923170371	0.760749125149256	Intron (ENST00000370112.8/148867, intron 8 of 11)	SLC30A7
cluster_1	chr1_101653382_101654200	17.8042980929242	3.83890089402569	1.48707614131483	1.60985046657896	0.956943451223864	Intron (ENST00000668955.1/105378872, intron 2 of 3)	LINC01709
cluster_1	chr1_1024636_1025485	13.7741862857535	5.41882875954796	2.60417617670553	4.31249658622849	0.909008699030407	Intron (ENST00000379370.7/375790, intron 2 of 35)	AGRN
cluster_1	chr1_1040002_1041549	18.9930470225064	9.56500463242539	6.22720061159777	9.42516999404716	0.829090510623933	Exon (ENST00000379370.7/375790, exon 4 of 36)	AGRN
cluster_1	chr1_10508477_10509089	13.5575690614962	10.5358099769995	2.20401023454418	4.25368919962468	0.608363091617141	Intron (ENST00000472851.1/5195, intron 2 of 3)	PEX14
cluster_1	chr1_10530274_10530944	17.2016048929365	7.77339903843723	1.82311061822603	6.6616169301663	0.770124639472784	Intron (ENST00000472851.1/5195, intron 3 of 3)	PEX14
cluster_1	chr1_10638926_10639685	15.6081371753933	7.19502528891286	2.57335779896929	2.42972891665939	0.885532137942918	3' UTR	CASZ1
cluster_1	chr1_10679511_10680078	19.2296754431174	14.3274238335259	5.12014993245871	7.69054529201804	0.661411959147074	Intron (ENST00000377022.8/54897, intron 4 of 20)	CASZ1
cluster_1	chr1_1068524_1069841	20.0006852394079	15.0617493438158	8.00754310635008	13.7902324026355	0.604925201225833	Exon (ENST00000412397.2/100288175, exon 9 of 10)	LOC100288175
cluster_1	chr1_10788490_10789100	8.52674002915331	5.32360979546178	3.98645075223019	2.35266765253532	0.747538515489451	Intron (ENST00000377022.8/54897, intron 1 of 20)	CASZ1
cluster_1	chr1_1079342_1080745	22.277981315938	14.2146998198727	6.14136593329275	9.79900723717011	0.761799417394354	Distal Intergenic	C1orf159
cluster_1	chr1_10814943_10815962	11.4791582693216	9.71492982319351	2.55085727849838	2.56947527124971	0.564615302465034	Distal Intergenic	CASZ1
cluster_1	chr1_10835600_10836390	38.1762631090313	29.8550140639774	13.409968252709	10.0763542109146	0.623857936813622	Distal Intergenic	CASZ1
cluster_1	chr1_108660777_108661707	14.6263210085565	7.12348494832781	10.5132720346533	4.26473303733687	0.547682341670632	Promoter (<=1kb)	LOC105378890
cluster_1	chr1_108947797_108948510	11.4320080303262	3.45451436708127	2.19504484496882	3.57113278398513	0.867774137113914	Promoter (<=1kb)	CLCC1
cluster_1	chr1_10909887_10910554	11.4667140089658	5.06299555222161	2.61926591676939	3.1968512118539	0.954069187724953	Distal Intergenic	C1orf127
cluster_1	chr1_109240575_109241243	18.4566609532451	3.08090293018087	3.65871187615401	6.29471829221683	0.738331232671726	Distal Intergenic	SARS1
cluster_1	chr1_109263275_109264156	18.4929597579375	11.0479809073344	12.045642106659	7.69093332615052	0.692034258519805	Promoter (1-2kb)	CELSR2
cluster_1	chr1_109277277_109277844	16.2612058008105	8.60986422792363	5.57261638473003	5.02715917529387	0.923306412762973	Distal Intergenic	PSRC1
cluster_1	chr1_10960872_10961510	15.5855719100832	8.76233542871062	3.94292835468691	4.62606760222865	0.850151772666731	Promoter (2-3kb)	C1orf127
cluster_1	chr1_109643225_109644051	14.399881061077	6.29886813892688	3.81712305432863	4.12779068082304	0.977141376015469	Distal Intergenic	GSTM4
cluster_1	chr1_109876920_109877921	16.2656395040658	9.91288266423227	4.47436897376309	3.96195324241914	0.786093483566001	Distal Intergenic	CSF1
cluster_1	chr1_110067723_110068363	11.0998804726871	8.44785815823852	5.66205746670013	3.39108956870013	0.630798720651186	Promoter (2-3kb)	ALX3
cluster_1	chr1_11045264_11046018	16.638190503266	7.79491245214666	2.28655736696458	1.78558947581491	0.852455396269796	Promoter (<=1kb)	MASP2
cluster_1	chr1_110477483_110478589	7.4808646500581	1.3183842706882	1.31496280683781	1.80281112051059	0.820304586001537	Promoter (2-3kb)	CYMP
cluster_1	chr1_11052668_11053601	17.4538060893394	3.16218353844435	2.21439244487071	2.11582702687018	0.902975743622457	Promoter (1-2kb)	SRM
cluster_1	chr1_111515463_111516531	6.28824003788461	1.27779608994894	1.59411618116146	1.68534589168248	0.799546274565066	Intron (ENST00000369717.8/57413, intron 1 of 5)	TMIGD3
cluster_1	chr1_112743323_112744641	9.71472035104744	2.73410119467399	1.98711782301786	2.3213307775308	0.909614352527207	Distal Intergenic	TAFA3
cluster_1	chr1_112817272_112818577	24.8102862651751	6.50647416408815	1.29608569356173	1.14555093245572	0.977885377674709	Distal Intergenic	LINC01356
cluster_1	chr1_112826823_112827787	5.41344685487085	2.09881887576806	1.07014075960954	1.60135369488246	0.930584837339732	Promoter (<=1kb)	LINC01356
cluster_1	chr1_11286322_11287326	14.5434459176852	12.8486184096417	4.03874569607504	4.68160663072766	0.548771203235366	3' UTR	UBIAD1
cluster_1	chr1_112905467_112906469	8.23811594140126	2.19077725938579	0.91401136388943	1.41611724918898	0.947284748849521	Distal Intergenic	SLC16A1
cluster_1	chr1_113027123_113028281	16.3950612646972	3.85188045280263	1.2275199817117	1.18220991434073	0.974279737641264	Intron (ENST00000627431.2/100506392, intron 4 of 5)	LOC107985189
cluster_1	chr1_113041831_113043102	29.9982727356995	16.5585940512008	8.05463051474564	6.13289963098	0.827716864275538	Intron (ENST00000627431.2/100506392, intron 5 of 5)	LRIG2-DT
cluster_1	chr1_1136430_1137284	11.0829943232637	3.80140438082988	2.28758633437163	4.10022692456368	0.84005019663387	Promoter (<=1kb)	LINC01342
cluster_1	chr1_113978813_113979843	22.6364493881771	11.9364983521225	10.6519408778707	6.0985757113417	0.792444040752856	Promoter (<=1kb)	OLFML3
cluster_1	chr1_114032863_114033697	11.5148651029875	1.52144309924771	1.38238194990288	4.0470496006385	0.714203975070748	Exon (ENST00000632517.2/ENST00000632517.2, exon 1 of 1)	OLFML3
cluster_1	chr1_114037887_114038879	11.2437096384191	3.89040387413377	0.933332191861916	2.36073388601596	0.916835456535768	Distal Intergenic	OLFML3
cluster_1	chr1_114075489_114076457	10.8013726839563	5.06999827923322	2.76798018639529	2.15356358595401	0.907934272383933	Distal Intergenic	SYT6
cluster_1	chr1_114088257_114089153	14.7064082808792	1.43762419549833	1.68809420406093	1.96942613711308	0.832639443263057	Distal Intergenic	SYT6
cluster_1	chr1_115147732_115148624	8.01447518017307	3.39214818095521	3.08128474670327	1.95488064919687	0.867643975886033	Distal Intergenic	LINC01765
cluster_1	chr1_115337354_115338867	16.196754822715	13.4949671885655	9.58845589419153	5.81602227777922	0.565568456864588	Promoter (<=1kb)	NGF
cluster_1	chr1_115545689_115546572	11.2290412727474	7.72270159500892	3.04003794169533	2.56981588879336	0.698739385939378	Distal Intergenic	VANGL1
cluster_1	chr1_115771542_115772323	16.4198302177718	7.30858886139407	10.8416437930455	6.58538150718393	0.616814000005256	Promoter (2-3kb)	CASQ2
cluster_1	chr1_115838277_115839829	13.1506309867589	9.70627054059963	8.37207425907522	3.14263550550986	0.545625640087438	Promoter (<=1kb)	NHLH2
cluster_1	chr1_115969421_115969994	17.0516414591413	6.56015779971033	10.9720970770563	5.23943409216791	0.593788473792362	Distal Intergenic	SLC22A15
cluster_1	chr1_116167515_116169358	10.947237354284	8.1105417974349	8.1768852574734	3.70050335703013	0.515027518953102	Downstream (<=300bp)	LINC01779
cluster_1	chr1_1164527_1165382	13.6760202643214	4.97559678911677	2.4873522605074	1.17382720477631	0.918047108519031	Promoter (1-2kb)	MIR200B
cluster_1	chr1_11648548_11649253	16.6485074153682	5.6730670254466	1.66198846692758	3.88160619242919	0.912855589055348	Promoter (1-2kb)	FBXO2
cluster_1	chr1_11654133_11655305	23.6335104168921	17.2755859404887	8.43918666538773	9.46850867800315	0.712490061467925	Promoter (<=1kb)	FBXO2
cluster_1	chr1_11663897_11665147	24.829501135849	10.9276182941211	6.12615027173559	7.78922283730197	0.951570468978433	Promoter (<=1kb)	FBXO6
cluster_1	chr1_11682331_11683093	25.1089520799308	5.98815362512332	3.8849860096207	3.68822030229426	0.93056428602335	Promoter (1-2kb)	MAD2L2
cluster_1	chr1_117268568_117269648	14.4562415800439	8.40012732545532	2.81476213312553	2.94185916754223	0.785508963068808	Promoter (2-3kb)	LINC01525
cluster_1	chr1_1173562_1174358	15.6073292658936	10.4786076355768	4.54300044135314	2.86728713730717	0.697688088689661	Promoter (<=1kb)	TTLL10
cluster_1	chr1_11761961_11763059	9.61179826146961	4.30088414612233	2.84895030493416	1.97968016608634	0.913870860150019	Promoter (<=1kb)	C1orf167
cluster_1	chr1_11784767_11785570	19.0651280955851	8.42869219565945	4.89389445450386	4.90744650943947	0.967907040296752	Promoter (<=1kb)	C1orf167
cluster_1	chr1_11787225_11787828	14.5568004484065	7.19370304210924	2.57257840385517	3.79067354333126	0.874228042362044	Promoter (<=1kb)	C1orf167
cluster_1	chr1_118184707_118185788	20.719782913405	14.0649310718359	11.9461927371264	6.23169279145807	0.652355476170019	Promoter (<=1kb)	LOC105378930
cluster_1	chr1_11882888_11883695	13.4212616445757	2.25351705665774	1.92241255393549	2.28636800443192	0.863917966964338	Distal Intergenic	NPPB
cluster_1	chr1_118984274_118984841	18.4223407295486	9.00947193715527	6.38431629930029	6.31409010606761	0.978957918031081	Intron (ENST00000207157.7/6913, intron 1 of 7)	TBX15
cluster_1	chr1_118987473_118988623	18.1270937618328	7.73899853837373	5.36338310069773	3.73826791339675	0.922952700685814	Promoter (<=1kb)	TBX15
cluster_1	chr1_119340707_119341697	23.0222044326613	1.15406364439512	0.677147703534957	1.53183953188713	0.85545278222698	Intron (ENST00000457683.1/105378934, intron 2 of 3)	LINC01780
cluster_1	chr1_11966970_11967594	14.1587667214201	5.47781544503013	2.67530689308508	3.65816243863855	0.954916991319975	Promoter (2-3kb)	PLOD1
cluster_1	chr1_12063352_12064199	9.10836610277413	3.39717521684649	1.59473972450903	1.80480784747405	0.975570133508094	Promoter (<=1kb)	TNFRSF8
cluster_1	chr1_12078737_12079919	16.4458301396019	3.83359687489433	1.66304807733044	1.35494526436201	0.962380640370423	Intron (ENST00000263932.7/943, intron 1 of 14)	TNFRSF8
cluster_1	chr1_1246372_1247381	12.3147718720937	5.72831813197224	4.28179886225785	2.39604729634939	0.857774781409812	Promoter (<=1kb)	C1QTNF12
cluster_1	chr1_12615839_12616814	21.7045904802997	14.7031352350023	4.56201353712272	4.70161715467407	0.697322394699245	Promoter (<=1kb)	DHRS3
cluster_1	chr1_12629063_12630294	13.8703074812053	2.38456196981946	1.09288809995461	1.47436165986949	0.919010411419495	Distal Intergenic	DHRS3
cluster_1	chr1_1291762_1292218	24.5534279667141	7.12426671314361	4.87919022077941	7.75149020249685	0.856435371463609	Promoter (2-3kb)	ACAP3
cluster_1	chr1_1293573_1294367	20.827778823398	5.01678818263493	4.02097530616958	2.28239848865774	0.907566395597292	Promoter (<=1kb)	ACAP3
cluster_1	chr1_1353487_1354419	27.3505113381671	3.7847545019845	2.24496184390183	4.20644997371588	0.864901605062963	Promoter (<=1kb)	MXRA8
cluster_1	chr1_1371966_1372381	21.0436677813171	13.3195997010576	6.67139898434863	7.71599923284267	0.80982759314761	Promoter (2-3kb)	AURKAIP1
cluster_1	chr1_1409886_1410960	16.2241170182054	5.41265851030793	0.806410305377905	3.00563571436773	0.91121828385244	Promoter (<=1kb)	MRPL20-DT
cluster_1	chr1_14182909_14183976	5.00848000266277	1.60300329207008	1.0710318121426	3.14022119710447	0.583853507152923	Intron (ENST00000636564.1/23254, intron 2 of 2)	NA
cluster_1	chr1_1419774_1420597	15.4036221247057	2.8809274445413	1.49473187702171	2.04788099334996	0.913493304478912	Promoter (<=1kb)	ANKRD65-AS1
cluster_1	chr1_1425607_1426241	18.1261604137057	6.47912998100363	5.21279258349661	3.46472489442284	0.914827620787525	Promoter (<=1kb)	TMEM88B
cluster_1	chr1_1431906_1432230	24.906618590178	19.989255180705	9.62813645512556	3.99147699828442	0.571900154525998	Promoter (<=1kb)	LINC01770
cluster_1	chr1_1435303_1435935	31.3310089399101	18.6758194110331	12.4633466432788	22.8278295680066	0.599143877593231	Promoter (<=1kb)	VWA1
cluster_1	chr1_145465138_145465978	22.9602037023401	13.8411573844353	6.03132704571124	9.10857353350655	0.801837640548755	Exon (ENST00000605806.1/ENST00000605806.1, exon 1 of 1)	NBPF20
cluster_1	chr1_145845319_145846561	14.5380005732184	8.38514995585314	6.28216908927077	8.03264868237555	0.861069744855981	Promoter (<=1kb)	NUDT17
cluster_1	chr1_145871786_145873130	12.5282953974985	4.8458564023803	4.68595551062514	3.00889508230008	0.863222945212618	Exon (ENST00000544626.2/148741, exon 8 of 12)	PIAS3
cluster_1	chr1_146409362_146410693	20.9059095069957	16.2776494128286	7.54229623549123	7.68447695189444	0.654123744351344	Exon (ENST00000620022.1/ENST00000620022.1, exon 1 of 1)	SEC22B4P
cluster_1	chr1_147224953_147225797	10.3156876875881	4.95148273860275	3.92456484790926	2.64532062814603	0.882905722178717	Promoter (<=1kb)	FMO5
cluster_1	chr1_147567608_147568409	14.0654381271488	5.79665451856218	3.31340989539709	3.15001839276541	0.971684597135425	Intron (ENST00000683836.1/607, intron 1 of 9)	BCL9
cluster_1	chr1_147586307_147587895	11.5167573853801	5.75362181463292	3.24317241016472	3.83448270695473	0.937521922421719	Intron (ENST00000683836.1/607, intron 1 of 9)	BCL9
cluster_1	chr1_147833278_147834592	11.9817479990719	5.6084894462247	1.75101145401255	1.74824145894209	0.869949515563908	Distal Intergenic	LOC102723321
cluster_1	chr1_147837014_147837716	20.8409854320006	2.74570145578021	1.17215004231149	1.05222010801947	0.916003900752215	Distal Intergenic	LOC102723321
cluster_1	chr1_148013120_148014146	8.76960161853443	2.11126151720058	1.44120273146356	1.93013550033563	0.893451439578847	Promoter (<=1kb)	LINC02804
cluster_1	chr1_148262878_148264272	38.9467273971167	15.9432214799525	8.74878255642414	16.4156338588731	0.821684799292208	Exon (ENST00000363009.1/ENST00000363009.1, exon 1 of 1)	LOC101927468
cluster_1	chr1_148264712_148265291	28.0015190276084	6.72181984976088	4.07842683623789	4.3590354027006	0.93281516887543	Distal Intergenic	LOC101927468
cluster_1	chr1_148303110_148304199	9.18112300979566	5.05763367517318	3.80577462075808	3.59769048042139	0.960344740176927	Intron (ENST00000648583.1/ENST00000648583.1, intron 1 of 3)	LOC105371225
cluster_1	chr1_148317319_148319033	9.74010741224536	2.59618153408834	1.23267607373618	1.12042462901843	0.96899088684109	Exon (ENST00000452108.1/ENST00000452108.1, exon 1 of 1)	MIR5087
cluster_1	chr1_148353313_148354363	11.4500965238774	3.44525750638403	3.00614957166096	2.08702619724515	0.902947758567387	Intron (ENST00000638958.1/105371225, intron 1 of 6)	RNVU1-1
cluster_1	chr1_148361294_148363052	11.2909622601909	4.25973186701403	3.11262792243004	6.03192657563039	0.703058529209729	Promoter (<=1kb)	RNVU1-1
cluster_1	chr1_148378519_148379591	11.2236604622616	1.72870387261973	1.38846981693852	1.7167744887807	0.867516752416319	Exon (ENST00000622328.1/388685, exon 2 of 4)	MIR6077
cluster_1	chr1_149845371_149845907	17.1185825482206	4.63867633527477	2.39152278398477	3.65530897927855	0.923659998029867	Promoter (2-3kb)	H2AC18
cluster_1	chr1_149936663_149937347	10.913570926254	6.15824083583979	1.87610942664527	4.25041995009968	0.764807801391458	Promoter (<=1kb)	MTMR11
cluster_1	chr1_150213397_150214480	20.6322801584501	14.8115022481465	7.09897404505663	11.3905219116285	0.687191928573049	Distal Intergenic	ANP32E
cluster_1	chr1_150259745_150260472	33.4557005859149	18.3489480313754	4.43360509765708	6.95374174335891	0.796495346686368	Promoter (1-2kb)	CA14
cluster_1	chr1_1504690_1505889	12.8922482722945	6.05383565652201	3.96182982745579	5.123666754998	0.924425890543695	Promoter (<=1kb)	ATAD3B
cluster_1	chr1_150537622_150538609	13.7437473584221	4.63837686454491	1.84102990414045	2.21616673663224	0.976741832299137	Distal Intergenic	ADAMTSL4
cluster_1	chr1_150604418_150605587	19.663162393596	8.6114816329133	2.74232091028775	4.13421116633644	0.905937978836662	Intron (ENST00000369016.8/2029, intron 4 of 4)	ENSA
cluster_1	chr1_150634809_150635779	16.1371922111023	4.0543252540711	1.22736718759417	2.48532952036215	0.944432790518846	Exon (ENST00000702956.1/112268239, exon 2 of 2)	LOC112268239
cluster_1	chr1_150971899_150972450	12.2905163910863	10.1226396095277	4.23362486504378	3.6154066081978	0.595417208639963	Promoter (<=1kb)	CERS2
cluster_1	chr1_150981086_150982020	22.5423627574238	8.86282367384675	2.56133884713052	4.55478444808166	0.923714897260992	Promoter (<=1kb)	ANXA9
cluster_1	chr1_151024388_151024991	10.7019083470022	4.88065730500632	2.36637334741313	4.51586564925867	0.825566283354064	Promoter (<=1kb)	PRUNE1
cluster_1	chr1_151131048_151132312	29.7164474923868	12.3856239855207	5.23531186067558	11.2833702123797	0.834509523616965	Promoter (2-3kb)	SEMA6C
cluster_1	chr1_151133061_151133709	15.8124551934408	3.60282517370791	2.58818605700138	2.43051475132718	0.915119711101222	Promoter (1-2kb)	SEMA6C
cluster_1	chr1_151512919_151513368	27.829054652031	8.93344575950029	0.930397946293626	2.31986492459191	0.943281293465599	Promoter (1-2kb)	CGN
cluster_1	chr1_151593745_151594603	10.4763246919675	5.71154852659023	3.58880132052967	3.91708844370099	0.935790467086188	Distal Intergenic	SNX27
cluster_1	chr1_15186557_15187458	9.39221846493346	2.92410800499095	1.47623705094568	2.20598187704019	0.935981268692004	Intron (ENST00000428417.5/55092, intron 1 of 2)	TMEM51-AS2
cluster_1	chr1_15196838_15197558	10.1223334843195	3.61656572992818	2.22540653050312	2.02058671533956	0.973535006132708	Intron (ENST00000428417.5/55092, intron 1 of 2)	TMEM51-AS2
cluster_1	chr1_151992358_151992990	12.3151563714824	6.32048495615082	2.59329699648411	4.72702553426556	0.833871584351247	Promoter (<=1kb)	S100A10
cluster_1	chr1_152036283_152037309	11.2632516533118	7.56255647943928	4.91898462148243	2.53905682924353	0.686865233120777	Promoter (<=1kb)	S100A11
cluster_1	chr1_153122796_153124230	15.8972107834536	6.08467977717036	0.532464668261667	1.81227510597851	0.894739322914007	Distal Intergenic	SPRR2F
cluster_1	chr1_153494804_153495504	15.8128924586486	4.88794602226552	4.7376937825291	4.92196495025106	0.858687131409776	Distal Intergenic	S100A7
cluster_1	chr1_153598530_153599295	13.2325010195903	2.63011740899713	3.00321209588787	2.6337973196921	0.839240636333997	Intron (ENST00000647794.1/ENST00000647794.1, intron 1 of 1)	S100A16
cluster_1	chr1_153612860_153613383	16.0105066659416	6.35799270729724	2.67404766407638	3.15562825856912	0.957165244996014	Promoter (<=1kb)	S100A16
cluster_1	chr1_153697169_153698771	12.3880587101887	5.50659182122874	5.29909414799194	2.22997083993507	0.774694603933727	Distal Intergenic	MIR8083
cluster_1	chr1_15430854_15431561	10.1946725106748	5.82324712463339	2.58353874092178	5.50730761370843	0.711899206530996	Distal Intergenic	CTRC
cluster_1	chr1_154352352_154353607	17.0289126362637	10.6773379778229	5.52934124598185	6.95743071402252	0.822368634424109	Distal Intergenic	ATP8B2
cluster_1	chr1_154501467_154503228	9.06523864408128	4.66671884739767	3.42484799600203	2.46077410302014	0.884639660332546	Promoter (<=1kb)	TDRD10
cluster_1	chr1_154609327_154609814	21.0839186723618	5.23144170950124	2.25565366628295	2.36636521913678	0.965635356658603	Promoter (<=1kb)	ADAR
cluster_1	chr1_154760304_154761044	11.8621706061711	9.89213085418331	4.24397449089673	2.34483902558716	0.56494803570662	Intron (ENST00000271915.9/3782, intron 3 of 7)	KCNN3
cluster_1	chr1_154970607_154971367	59.4512983751237	30.393070432906	19.6761201066277	27.3001931300968	0.879349394405236	Promoter (<=1kb)	SHC1
cluster_1	chr1_154972493_154972934	42.7963072899084	15.0613557438099	4.88681857822575	2.72938288876041	0.930712598714239	Promoter (1-2kb)	SHC1
cluster_1	chr1_154993048_154993724	11.2991035914109	4.46734919387712	2.47681333922956	5.72324546160493	0.721006180600658	Promoter (<=1kb)	LENEP
cluster_1	chr1_155044677_155045267	12.1964731167316	7.6533932192371	2.31604974935599	2.80920262005577	0.742896257594792	Promoter (<=1kb)	DCST1-AS1
cluster_1	chr1_15508525_15509453	23.876403883524	1.05010809477454	1.11788996485943	0.831496799160714	0.856611599978115	Promoter (1-2kb)	CASP9
cluster_1	chr1_155165971_155168182	19.7891157132751	18.0545160628091	7.97224006907768	9.28123477958085	0.542259748118508	Distal Intergenic	KRTCAP2
cluster_1	chr1_155728806_155729609	8.85065828117507	7.24737849324256	2.69253943273982	3.39402925717985	0.605731769486221	Promoter (<=1kb)	DAP3
cluster_1	chr1_15584295_15585334	16.5675738058001	8.64232172262033	2.10939952947904	1.79168029640165	0.80024426899393	Promoter (<=1kb)	AGMAT
cluster_1	chr1_155977695_155979265	25.7496030156901	18.2258482702728	7.84578250061439	9.71437512638003	0.716207450229152	Promoter (<=1kb)	ARHGEF2-AS2
cluster_1	chr1_155984278_155984808	22.5291929128525	5.46222660829808	1.24601544150858	1.86125401824877	0.977164105619101	Exon (ENST00000462460.6/9181, exon 4 of 26)	ARHGEF2
cluster_1	chr1_156025843_156026365	13.0922664947763	7.61095270177643	5.4820405484687	3.27810227690087	0.788898655374706	Intron (ENST00000650235.1/105371729, intron 3 of 3)	SSR2
cluster_1	chr1_156060767_156061826	30.4875376233687	13.8009116656555	2.05025340754779	1.82117244546026	0.836764518610746	Promoter (<=1kb)	RAB25
cluster_1	chr1_156073693_156074147	25.5789000134432	20.2264962486595	8.58555559580432	3.94184188416238	0.586646631671494	3' UTR	RAB25
cluster_1	chr1_156076778_156077200	22.3608671465466	7.53662046904838	4.236296123115	3.87729035957768	0.976088652176675	Exon (ENST00000532414.3/92312, exon 2 of 2)	MEX3A
cluster_1	chr1_156105061_156105537	15.7344931957336	7.20388342625795	1.70390236772099	3.73539715097021	0.861214453171316	Promoter (1-2kb)	LMNA
cluster_1	chr1_156114043_156115646	25.170363709176	10.8636606511255	7.22750815996937	13.0443221110585	0.751039173417976	Promoter (<=1kb)	LMNA
cluster_1	chr1_156149480_156150811	17.4211557103142	6.06482381448606	5.10066488875408	11.0867978183299	0.593711581488417	Promoter (<=1kb)	SEMA4A
cluster_1	chr1_156181314_156182405	18.0302934621577	10.4140921220335	3.0310170096733	3.396824785187	0.777933576542077	Distal Intergenic	SEMA4A
cluster_1	chr1_156245463_156246247	17.0777767025847	5.14597048001611	2.39120338734224	2.0585882419917	0.976356107622455	Promoter (1-2kb)	PAQR6
cluster_1	chr1_156356730_156357395	24.5029851692948	6.68597909063772	3.10594534289929	5.1725240061609	0.924836135226925	Intron (ENST00000413555.5/7203, intron 1 of 7)	CCT3
cluster_1	chr1_156368755_156369642	18.3706515056377	4.64099546550093	3.45676370950014	3.0980278878992	0.919640585781047	Promoter (<=1kb)	RHBG
cluster_1	chr1_156382889_156383426	19.1546488855788	6.1767644828779	9.89947504564082	13.0219749343877	0.519583201005785	Promoter (<=1kb)	RHBG
cluster_1	chr1_156480606_156481278	11.4123072434129	5.56881883714357	3.20366992748301	6.32444729277233	0.722459091364877	Promoter (<=1kb)	MEF2D
cluster_1	chr1_156503277_156503623	39.1673145903701	8.6480976834597	1.88601686975458	6.05400115189422	0.921000221006765	Promoter (2-3kb)	MEF2D
cluster_1	chr1_156668037_156669405	17.9877733120814	13.6470603918987	10.4763416583645	5.81818075310813	0.609347335620275	3' UTR	BCAN-AS1
cluster_1	chr1_156691719_156692427	15.7736006255066	13.7676270175956	4.63145112241722	4.42695962446608	0.55415744555992	Exon (ENST00000441272.2/ENST00000441272.2, exon 1 of 2)	CRABP2
cluster_1	chr1_156692539_156693596	36.1127070818547	27.0346250370667	6.90378319170925	3.86830123669898	0.614873636732959	Intron (ENST00000650347.1/ENST00000650347.1, intron 1 of 1)	CRABP2
cluster_1	chr1_156694255_156694678	18.785884211623	6.71064328339103	2.72266457895403	2.5493977182426	0.964807287568332	Intron (ENST00000650347.1/ENST00000650347.1, intron 1 of 1)	CRABP2
cluster_1	chr1_156813477_156814595	17.9486739338661	8.1659007192264	8.5434948701831	4.20621048804861	0.762733907761854	Promoter (<=1kb)	SH2D2A
cluster_1	chr1_156876076_156876753	13.4530245867857	6.69528360465867	3.31402203116143	6.81879014157208	0.753022571103394	Promoter (1-2kb)	NTRK1
cluster_1	chr1_156913022_156913902	8.44308908534297	1.69838706646657	3.13170772787062	3.4182942075091	0.66821579494726	Promoter (<=1kb)	PEAR1
cluster_1	chr1_156920067_156921065	17.591578902	11.1143017104558	6.66097062961493	4.86071383764907	0.77883918854874	Promoter (<=1kb)	LRRC71
cluster_1	chr1_156927398_156928189	19.658004445148	8.18366367866815	6.30402211735208	6.1840564021266	0.958114666147765	Promoter (<=1kb)	LRRC71
cluster_1	chr1_157074069_157074738	13.6262022307359	3.22809300896465	3.391264322916	3.19673878399026	0.849137139458792	Exon (ENST00000414328.2/ENST00000414328.2, exon 1 of 1)	ETV3L
cluster_1	chr1_157155730_157156475	17.6632958995942	7.96355064727044	6.65529749710345	5.05328611349261	0.914689527377495	Distal Intergenic	LOC107985211
cluster_1	chr1_157161955_157162706	11.7262777199793	4.21206408148546	1.25816994466229	1.29044948268737	0.947560712722813	Distal Intergenic	LOC107985211
cluster_1	chr1_157163292_157164075	19.5207005175117	3.62709043682323	3.73311165884373	6.00107133763101	0.778841923124697	Distal Intergenic	LOC107985211
cluster_1	chr1_15741329_15741802	17.0652877045126	6.49194496251561	3.44961976584439	5.57996339966799	0.901285229502539	Promoter (<=1kb)	TMEM82
cluster_1	chr1_15757526_15759464	15.0638228444273	9.3592344555913	5.26893088748161	5.53554783558503	0.841962179120366	Promoter (<=1kb)	FBLIM1
cluster_1	chr1_15791937_15792426	15.5337006254626	8.65113777306118	5.24370653911334	4.58771428623649	0.88230651405036	Distal Intergenic	FBLIM1
cluster_1	chr1_157978512_157979483	8.93172113893066	3.458416810585	2.83881435143843	1.59368617679475	0.883490617339462	Distal Intergenic	KIRREL1
cluster_1	chr1_15800109_15800842	8.96871132549284	8.42858673295438	2.87828994938239	1.98885661811871	0.504254816379758	Distal Intergenic	UQCRHL
cluster_1	chr1_158019196_158019942	11.4630691849848	7.67229322407284	4.2971601193212	3.62416158415038	0.761780673724414	Intron (ENST00000360089.8/55243, intron 1 of 12)	KIRREL1-IT1
cluster_1	chr1_158117825_158118338	21.1198380875604	7.10471658490327	9.11073749288677	5.12054344386985	0.771174868340817	Distal Intergenic	SMIM42
cluster_1	chr1_158180741_158181740	18.683507347077	5.82572597378957	10.1560998883017	10.5289886710847	0.576180704494508	Promoter (<=1kb)	CD1D
cluster_1	chr1_158864440_158865090	12.3612256247309	5.1584025421422	4.23787811745303	2.36195162781408	0.869701411553197	Distal Intergenic	MNDA
cluster_1	chr1_159005626_159006887	5.77654615537965	3.51359579029004	1.5827444608693	0.757390869943937	0.731028647334533	Promoter (<=1kb)	IFI16
cluster_1	chr1_15949104_15950189	10.2637658624116	5.86143991771042	2.68051136018677	3.44009645526316	0.846966428797629	Promoter (1-2kb)	ZBTB17
cluster_1	chr1_16003881_16004410	7.50075005872778	5.20649985511376	1.18318700620799	1.29109293985009	0.666397040897132	Promoter (<=1kb)	SRARP
cluster_1	chr1_160046402_160047096	12.6994751529521	6.53895973124378	6.03545984918473	3.01810035141146	0.762786391556181	Intron (ENST00000639408.1/3766, intron 1 of 3)	PIGM
cluster_1	chr1_160095755_160096260	22.5344209648107	5.93119103429914	9.72274719087211	3.99053715848743	0.715567595340064	Promoter (<=1kb)	IGSF8
cluster_1	chr1_160108970_160109774	12.7793091729488	10.2954884533249	4.49052469160775	2.46100284914429	0.584616218080262	Distal Intergenic	ATP1A2
cluster_1	chr1_160115463_160116187	16.7703766564092	8.46082194553687	3.36619696825949	2.70111187979997	0.849774475489337	Promoter (<=1kb)	ATP1A2
cluster_1	chr1_16012602_16013613	24.6719167244399	10.472070732808	3.70228848234607	5.45506634858015	0.92290222617882	Distal Intergenic	HSPB7
cluster_1	chr1_16026308_16027299	32.511323291954	16.447458351704	6.36029611902862	7.87133505661678	0.874206863165041	Promoter (<=1kb)	CLCNKA
cluster_1	chr1_16048208_16049253	24.9559099906442	14.631180151933	7.11417476175771	8.37218798952981	0.844896587807426	Promoter (<=1kb)	CLCNKB
cluster_1	chr1_160651916_160652893	13.1468944147136	4.63141115228913	2.20613791711795	2.79021374990038	0.971503552763975	Distal Intergenic	SLAMF1
cluster_1	chr1_160681347_160682075	13.3270300650193	5.40960672496084	5.39713900999968	3.26779042340128	0.839284528147734	Exon (ENST00000368046.8/962, exon 3 of 4)	CD48
cluster_1	chr1_160954135_160955109	14.2861429191247	3.6268052342346	1.08472396252614	1.82920384143666	0.962973500518778	Promoter (<=1kb)	ITLN2
cluster_1	chr1_160981264_160982575	23.3921489299191	4.4986260683857	2.07029187796204	2.24161569804082	0.936422038319263	Distal Intergenic	F11R
cluster_1	chr1_161013545_161014234	19.2049713850582	2.33504246400199	1.68380513566496	1.36465170904835	0.887702187343145	Intron (ENST00000368026.11/50848, intron 1 of 9)	F11R
cluster_1	chr1_161020065_161021700	34.0233682052489	17.5602880268561	8.28093030975271	13.5629908373371	0.851985127272077	Promoter (<=1kb)	F11R
cluster_1	chr1_161038227_161039219	21.3281672896285	8.89392691181848	5.2823272511464	6.77924360262783	0.94921622892365	Promoter (<=1kb)	TSTD1
cluster_1	chr1_161198245_161198719	20.7372402734279	7.12542873969397	8.62020695481028	3.44461466935807	0.762983948712133	Promoter (<=1kb)	ADAMTS4
cluster_1	chr1_161305728_161306705	37.7656652314829	15.6363900731628	12.2118610144448	13.1957055314198	0.938704628924485	Promoter (<=1kb)	MPZ
cluster_1	chr1_16162342_16162979	27.0597887368291	8.57106257814306	2.64673016051305	3.73544565715363	0.972207195261996	Distal Intergenic	EPHA2-AS1
cluster_1	chr1_16181661_16182438	18.9827653888666	9.95770522896936	3.22005258489155	2.92326200444551	0.821492179638657	Distal Intergenic	EPHA2-AS1
cluster_1	chr1_16212357_16212976	27.1820073912075	9.40625007103592	3.65602169097749	4.34635549646216	0.973800083881939	Promoter (<=1kb)	ARHGEF19
cluster_1	chr1_16215875_16216679	38.476523818434	25.0349762323235	8.65683357803546	10.7164080441331	0.737834156657379	Promoter (<=1kb)	ANO7L1
cluster_1	chr1_162229984_162230534	18.2142999141055	5.39870514528285	3.88162650859766	3.69701416780678	0.9360471910677	Intron (ENST00000361897.10/9722, intron 2 of 9)	LOC105371475
cluster_1	chr1_16226394_16227483	27.0580076456463	14.7332596374091	4.4605071985326	3.87741952063951	0.79685747419823	Promoter (<=1kb)	ANO7L1
cluster_1	chr1_162398214_162399723	5.1883269386261	2.82631697975001	1.14274167580814	1.92112807060328	0.829136248339889	Exon (ENST00000367929.3/117157, exon 3 of 4)	SH2D1B
cluster_1	chr1_162822234_162823216	20.9270082620832	6.77957900050034	10.1322326845468	10.9950712001553	0.64034116009551	Distal Intergenic	HSD17B7
cluster_1	chr1_1628697_1629441	19.1303832347963	4.13933428620544	2.9866280504693	4.7938934831115	0.851563264081902	Promoter (<=1kb)	MIB2
cluster_1	chr1_1630205_1630692	19.0967128021168	5.31374763009077	4.10855661725599	6.69956432401005	0.815491462023783	Promoter (<=1kb)	MIB2
cluster_1	chr1_1631360_1632468	13.525668084181	7.91750487965706	4.65524308456776	3.54053995460873	0.824581862121501	Promoter (<=1kb)	MMP23B
cluster_1	chr1_163202773_163203647	25.6451801769035	5.05628781326254	4.60141837335765	2.77873223556172	0.886430890405845	Promoter (<=1kb)	RGS5
cluster_1	chr1_163399841_163400572	25.0491131650254	4.61461645967969	6.29062292974252	7.83632182163816	0.757950342233261	Distal Intergenic	NUF2
cluster_1	chr1_164601676_164603152	11.7218565833751	10.0523699107578	2.26974425420695	4.95005639515476	0.549076462420116	Promoter (2-3kb)	PBX1
cluster_1	chr1_16490846_16491759	13.9545461021593	4.16039816024656	1.7220603657504	0.802696236193851	0.951623385301622	Promoter (<=1kb)	CROCCP3
cluster_1	chr1_165350828_165351401	8.92624723338568	4.20874903009947	1.57872680866388	1.21607876232905	0.867796817014752	Intron (ENST00000342310.7/4009, intron 3 of 8)	LMX1A
cluster_1	chr1_16618796_16619141	31.2277648072764	9.23180378880627	3.21653306230155	4.29941558002655	0.976898492481381	Exon (ENST00000639481.1/84809, exon 4 of 4)	NBPF1
cluster_1	chr1_16624942_16625291	30.7002155557047	6.062590090469	5.81161837534458	6.70824324260749	0.848083942561194	Promoter (1-2kb)	CROCCP2
cluster_1	chr1_166383102_166383922	5.92521385015718	0.793164279768437	1.90178160363223	3.24905936044466	0.556653318434148	Distal Intergenic	LOC112268276
cluster_1	chr1_166883866_166884716	12.3367534049423	6.71775387675509	8.28428905984546	2.84655575107873	0.569880084242429	Distal Intergenic	TADA1
cluster_1	chr1_166920366_166921569	10.6951186860779	3.78117720916625	2.03903910848736	1.52233179715286	0.959847343739512	Exon (ENST00000271417.8/387597, exon 9 of 10)	TADA1
cluster_1	chr1_16707301_16708314	10.3183244773372	7.11957523978979	2.53946887482333	1.83886408960282	0.679604988358861	Promoter (2-3kb)	ESPNP
cluster_1	chr1_167121211_167122132	14.9417698696116	5.72043618777383	5.21389424687545	4.74313590564126	0.904118650868701	Intron (ENST00000361200.7/92235, intron 5 of 5)	STYXL2
cluster_1	chr1_16727226_16727911	14.2318516468313	6.60524124913956	3.33535005708476	3.40959208879892	0.935389348864556	Distal Intergenic	ESPNP
cluster_1	chr1_167629851_167630608	9.40660212507988	2.80752488962274	5.40602965848553	3.22245379521281	0.61612787666903	Promoter (<=1kb)	RCSD1
cluster_1	chr1_167683781_167684421	15.9224806555825	2.95443933710211	2.72100402499135	2.49853291764194	0.873001509584869	Exon (ENST00000537350.5/92241, exon 2 of 6)	MPZL1
cluster_1	chr1_167796783_167797533	16.2471243706074	1.85294577219694	2.24770321276195	2.18385871942925	0.835773854131012	Distal Intergenic	MPZL1
cluster_1	chr1_167803262_167803940	15.1920992803211	4.51233902861842	4.46735817699188	1.66261811273984	0.8423989120132	Distal Intergenic	MPZL1
cluster_1	chr1_167820007_167820573	26.2840351745293	7.47361452957308	9.526215984696	4.25925111132866	0.789679959898087	Exon (ENST00000451545.1/ENST00000451545.1, exon 1 of 2)	ADCY10
cluster_1	chr1_168145502_168146264	18.3503042739663	6.32245163353483	6.03178262444377	3.81759887470142	0.874628517814708	Distal Intergenic	GPR161
cluster_1	chr1_16888788_16890016	32.9407684250655	17.645684104585	5.09210708107716	3.62221589389563	0.791429135183549	Promoter (<=1kb)	LOC105376805
cluster_1	chr1_16921275_16922175	51.675848918664	20.3971369984969	10.6189878950751	14.5746027671469	0.948526650137929	Promoter (<=1kb)	CROCC
cluster_1	chr1_16938633_16939995	21.9949010305538	8.31585532132902	3.99700335074518	3.00906257757448	0.948264025672805	Promoter (<=1kb)	CROCC
cluster_1	chr1_169529190_169529911	11.3234960518151	5.16014359963763	2.49067653982236	1.2220369747206	0.859113986402796	Exon (ENST00000367797.9/2153, exon 16 of 25)	F5
cluster_1	chr1_169586109_169586967	14.8420411981034	5.36120951107615	10.0513942238907	4.9213375572712	0.558166124589009	Promoter (<=1kb)	F5
cluster_1	chr1_16960541_16961432	26.2686292395694	12.2385692614247	7.84633099745331	4.03038273158745	0.854486393102166	Exon (ENST00000375541.10/9696, exon 27 of 37)	CROCC
cluster_1	chr1_16971809_16972359	9.43196382403884	7.44688349111661	2.53887853132506	3.29961234518938	0.622984996315012	Promoter (2-3kb)	CROCC
cluster_1	chr1_16979644_16980836	12.9927078244217	9.05819287326994	4.27351233579941	3.21845002283263	0.698411470221347	Promoter (<=1kb)	MFAP2
cluster_1	chr1_170094371_170095250	11.4770225635616	5.01782317663618	4.5287137021372	1.61263030611614	0.777996206746048	Distal Intergenic	KIFAP3
cluster_1	chr1_17011308_17012471	35.2652425312661	21.4675773386322	10.5894650011734	25.4522266963496	0.565198647826106	Promoter (<=1kb)	ATP13A2
cluster_1	chr1_170664266_170665224	17.6142090439415	10.6187359733597	11.8658797748803	7.2585369589475	0.660097709437665	Promoter (<=1kb)	PRRX1
cluster_1	chr1_17118967_17120411	15.6415899803823	10.9048949871348	4.69617577492227	10.6894360355674	0.577544531246412	Promoter (<=1kb)	PADI2
cluster_1	chr1_171219807_171221118	20.3270665957337	16.402913514926	10.079172535564	4.0481792736134	0.553896890081571	Intron (ENST00000669750.1/105371611, intron 2 of 4)	FMO2
cluster_1	chr1_17125642_17126280	13.4185459589298	10.4620220605755	2.57559875956173	4.4459005693067	0.612752619338782	Distal Intergenic	PADI2
cluster_1	chr1_171431723_171432661	12.7293196856608	1.05551457942222	0.996007154454676	1.0522804823748	0.856782047936774	Distal Intergenic	PRRC2C
cluster_1	chr1_171641174_171642013	17.6130066617228	3.16367764429654	2.43468387993724	1.24041653466456	0.903015604570205	Intron (ENST00000638471.1/4653, intron 2 of 3)	MYOC
cluster_1	chr1_171644864_171645556	18.5027174651626	6.04599444059357	9.35356896303331	5.01682111395751	0.694393424456475	Intron (ENST00000638471.1/4653, intron 1 of 3)	MYOC
cluster_1	chr1_171655249_171655866	14.3817238249411	2.50209199290367	2.35915488735948	3.23590594066927	0.831656976471908	Promoter (2-3kb)	MYOC
cluster_1	chr1_17236968_17237666	14.2724552532109	8.03970253118787	5.8196927182684	4.43920068772646	0.870014405832576	Promoter (1-2kb)	PADI1
cluster_1	chr1_172449754_172450374	16.2474462255649	7.12281713649932	10.888229233942	3.65720404837394	0.565391086754787	Promoter (<=1kb)	C1orf105
cluster_1	chr1_173122924_173123800	11.797516530288	4.12618152937649	3.39304358518235	1.92587989252248	0.895832789361409	Distal Intergenic	TNFSF18
cluster_1	chr1_173861470_173863327	28.1583845942326	5.09349706029195	2.30844363898593	2.05277152617389	0.936751053070148	Promoter (1-2kb)	GAS5
cluster_1	chr1_17406078_17406579	25.694146323373	7.23108526670971	8.84421411396931	7.89754286340729	0.804023644363083	Promoter (<=1kb)	RCC2-AS1
cluster_1	chr1_17419731_17420339	15.1630623573484	6.71888882532472	3.52590519266226	5.2034603209336	0.915120590817751	Intron (ENST00000375436.9/55920, intron 7 of 12)	RCC2-AS1
cluster_1	chr1_17469750_17470897	22.5336048788799	2.84435035970377	0.712340293104861	1.32876356219009	0.917190516279347	Distal Intergenic	RCC2
cluster_1	chr1_17494034_17494685	22.0411886789758	2.29764263830384	1.91184154333837	1.73447195160207	0.871725080805001	Distal Intergenic	ARHGEF10L
cluster_1	chr1_17502223_17502942	13.6259514470661	6.64600729540252	4.87171417096593	5.63704123916937	0.947486694386696	Distal Intergenic	ARHGEF10L
cluster_1	chr1_175146498_175147200	18.1266625041344	3.93585979194024	10.9041983197452	4.64930740830951	0.560964045553931	3' UTR	KIAA0040
cluster_1	chr1_17515912_17516987	10.7161748011623	3.92668974023479	3.70445105674426	2.64139769068453	0.885025930287714	Distal Intergenic	ARHGEF10L
cluster_1	chr1_175191993_175193497	14.3075593948297	6.45360337895776	7.66619923704237	4.0061184977887	0.721568617057041	Promoter (<=1kb)	KIAA0040
cluster_1	chr1_17547030_17547619	12.8466059738097	6.08235764338829	2.26972338181204	6.20002783351542	0.731118838246891	Intron (ENST00000361221.8/55160, intron 1 of 28)	ARHGEF10L
cluster_1	chr1_17551831_17552474	10.1495649924187	3.9150816901343	3.09981604070449	2.79197319676658	0.944792268756206	Intron (ENST00000361221.8/55160, intron 1 of 28)	ARHGEF10L
cluster_1	chr1_17587575_17588744	13.2172726071802	6.39929849866526	3.01147545930597	2.35068087287392	0.881202020053295	Exon (ENST00000361221.8/55160, exon 3 of 29)	ARHGEF10L
cluster_1	chr1_176948944_176949469	17.3972330075492	6.00266533111904	3.12384186859006	5.04006076317255	0.912310052859511	Exon (ENST00000367657.7/460, exon 12 of 23)	MIR488
cluster_1	chr1_177044263_177044921	25.3223859067914	4.37822963578877	2.83595446473717	2.65596975806485	0.908134644767003	Intron (ENST00000367657.7/460, intron 2 of 22)	ASTN1
cluster_1	chr1_1777863_1779315	28.3951604845962	19.2981054260978	10.3352683583254	13.5507834709982	0.776769224796226	Promoter (<=1kb)	NADK
cluster_1	chr1_1779999_1780532	21.891199003463	5.24035994096739	3.72542770979912	12.490466327598	0.597232256590932	Promoter (<=1kb)	NADK
cluster_1	chr1_178037401_178038306	27.13846204598	6.21969013832646	6.74145221000891	2.53880609235447	0.848264513360683	Promoter (<=1kb)	CRYZL2P-SEC16B
cluster_1	chr1_178060843_178061656	13.6604645291579	8.27425466139219	3.96965599298209	3.86555660501843	0.80982921684424	Distal Intergenic	CRYZL2P-SEC16B
cluster_1	chr1_1782098_1783268	23.8453985958787	4.58300514159007	1.96434632850908	3.50206929091728	0.911695864847699	Promoter (1-2kb)	NADK
cluster_1	chr1_178266480_178267166	38.7101634719773	8.1766930594354	11.1609063097268	5.44110449737181	0.809534158768641	Intron (ENST00000367649.8/9462, intron 1 of 17)	RASAL2
cluster_1	chr1_178282906_178283900	12.059713229304	2.07126261168483	3.29383578871458	2.9056301989058	0.772991753378107	Exon (ENST00000367649.8/9462, exon 2 of 18)	RASAL2
cluster_1	chr1_178320079_178320927	15.2151543444558	7.90584648268245	9.16804938898811	5.00350290093237	0.686060715826164	Intron (ENST00000367649.8/9462, intron 3 of 17)	RASAL2
cluster_1	chr1_178575593_178576294	7.72187617528141	2.24188514899146	3.05563450083962	5.43320554409282	0.513856748124905	Distal Intergenic	C1orf220
cluster_1	chr1_179087551_179088323	13.0713341146389	2.93147964907094	2.78044553890266	2.02097801069674	0.881268357681549	Promoter (1-2kb)	TOR3A
cluster_1	chr1_179529337_179530091	23.2140845448004	6.23727167264276	3.84302100482325	1.72139054112511	0.931865497256156	Intron (ENST00000617277.4/126859, intron 22 of 24)	AXDND1
cluster_1	chr1_179575249_179576250	11.4745898444722	5.20578638691949	6.24604232062616	3.18437065567386	0.71121856551625	Promoter (<=1kb)	NPHS2
cluster_1	chr1_179586071_179586844	12.754792106143	6.33102639168598	9.05747792174666	3.66715402791263	0.55513568914345	Exon (ENST00000427215.2/ENST00000427215.2, exon 1 of 1)	TDRD5
cluster_1	chr1_180167828_180168658	18.4400000657214	7.01917387677046	2.65504853474601	1.9899784439315	0.933108509602524	Intron (ENST00000367602.8/5768, intron 2 of 11)	QSOX1
cluster_1	chr1_180234484_180235294	24.8193797799198	7.64047854718222	4.39492023952865	3.52133045626233	0.964826688323998	Intron (ENST00000263726.4/89884, intron 1 of 5)	LHX4
cluster_1	chr1_180269946_180270548	17.0484573030866	2.84872622597743	2.69457891611574	2.93398422542731	0.856570318837299	3' UTR	LHX4-AS1
cluster_1	chr1_180911837_180913551	16.2386419278671	10.582487765237	7.4366838991055	3.50223647244575	0.685592149150888	Promoter (<=1kb)	KIAA1614
cluster_1	chr1_180923008_180923878	39.2628334181972	11.8319193808159	4.80927742534872	6.31997304238734	0.972969647122769	Intron (ENST00000367588.9/57710, intron 3 of 8)	KIAA1614
cluster_1	chr1_181038341_181038952	10.4833783883164	4.23683295162934	1.69620202464069	2.41290362933311	0.943315137621142	Intron (ENST00000614012.5/3140, intron 2 of 6)	MR1
cluster_1	chr1_18109839_18110803	17.9376904349046	11.3340935020708	4.59183141236563	9.19108915680102	0.70862171684218	Promoter (2-3kb)	IGSF21
cluster_1	chr1_181101506_181102288	29.38597946061	5.03985428024952	5.4145681245814	3.56316402169307	0.86139995497937	Distal Intergenic	IER5
cluster_1	chr1_181152859_181153457	7.28280040007016	2.50962334371337	3.76425247857502	2.13012132285372	0.696486127356925	Distal Intergenic	LINC01732
cluster_1	chr1_181181882_181182646	8.20236856034721	2.9384672642977	3.32827900625369	1.89333168095275	0.808175388681968	Exon (ENST00000435023.1/101928973, exon 3 of 3)	LINC01732
cluster_1	chr1_181482292_181483278	17.1587021003417	7.28306173469176	8.9667770061813	8.45741982351336	0.738403388826613	Promoter (<=1kb)	CACNA1E
cluster_1	chr1_18175802_18177087	6.98941620509658	3.08679221913883	1.17947488949436	2.47096859611207	0.850502873317212	Promoter (2-3kb)	IGSF21-AS1
cluster_1	chr1_181969664_181970689	15.1476803125408	2.50479400089942	2.00734021640869	1.22388184784861	0.89558676262549	Intron (ENST00000671017.1/ENST00000671017.1, intron 1 of 1)	ZNF648
cluster_1	chr1_182101291_182102057	25.9799283139156	10.3740617114224	3.62925846720778	2.76219359604863	0.916582598493072	Intron (ENST00000663078.1/400799, intron 3 of 4)	ZNF648
cluster_1	chr1_182806030_182806686	18.05010443114	3.78865835064641	3.11698890832802	2.94176526517723	0.891709938146615	5' UTR	NPL
cluster_1	chr1_18294580_18295306	34.0543316553466	1.23314222069304	0.600434367541187	2.69533100358288	0.842042896757492	Intron (ENST00000251296.4/84966, intron 3 of 9)	IGSF21
cluster_1	chr1_182957753_182958445	17.5971970495498	2.42218713395408	1.43933119212613	2.13749074021524	0.882794236666409	Distal Intergenic	SHCBP1L
cluster_1	chr1_18298131_18298912	32.777655101445	1.79744756654497	1.38158596323847	2.01934150088226	0.857005539336223	Intron (ENST00000251296.4/84966, intron 3 of 9)	IGSF21
cluster_1	chr1_183185695_183186588	27.3038346405348	13.0780668264148	5.95893892181302	8.46272062827526	0.907564690043625	Promoter (<=1kb)	LAMC2
cluster_1	chr1_18418508_18420278	15.2410053297437	1.69991018142738	0.547807199998797	1.33439446715196	0.890894549052587	Distal Intergenic	IGSF21
cluster_1	chr1_184663829_184664606	18.1160510167733	9.18752684105511	10.5629916530958	6.01749915205691	0.709127620338736	Promoter (<=1kb)	LOC105371648
cluster_1	chr1_18480260_18481409	24.9601191764414	6.7344673934495	2.11815429232147	3.2903016586393	0.968970196861423	Promoter (<=1kb)	KLHDC7A
cluster_1	chr1_184973493_184974866	18.981148519624	7.07473353838006	13.9909888379745	9.13506839818744	0.507908928441905	Promoter (<=1kb)	NIBAN1
cluster_1	chr1_185170140_185170826	11.8252140290652	6.0930313211227	7.52509225834565	2.65419921983017	0.598396487668912	Intron (ENST00000367501.7/54823, intron 4 of 18)	SWT1
cluster_1	chr1_185733755_185734865	25.0627551342982	10.8650425601477	17.0434440194462	6.63745413101011	0.566130878597173	Promoter (<=1kb)	HMCN1
cluster_1	chr1_18575524_18576098	21.1434803229445	7.78042112032264	2.21196115478044	3.55778059979186	0.94320871016455	Distal Intergenic	PAX7
cluster_1	chr1_185912045_185912955	16.5856908753514	1.45508263405537	0.880216018271655	0.674740904902135	0.885890296353952	Intron (ENST00000271588.9/83872, intron 6 of 106)	HMCN1
cluster_1	chr1_18630626_18631843	19.8623051643703	11.3106550661704	3.54452176221735	2.01871116507179	0.758262160591788	Promoter (<=1kb)	PAX7
cluster_1	chr1_18637552_18637978	17.3701332489307	15.8348046136548	3.89156193958115	3.69881605381205	0.522841245509431	Intron (ENST00000420770.7/5081, intron 4 of 8)	PAX7
cluster_1	chr1_18639012_18639794	6.78846177765071	3.20190288372527	1.13188051129308	1.4505889257415	0.890726214447227	Intron (ENST00000420770.7/5081, intron 4 of 8)	PAX7
cluster_1	chr1_18642434_18643049	16.6957534347585	8.39731955859506	1.80610529917782	1.27853898478203	0.80365922454209	Intron (ENST00000420770.7/5081, intron 4 of 8)	PAX7
cluster_1	chr1_18651733_18652473	17.7201464773163	4.92415958314798	0.465637294071607	1.5546041640291	0.962109002765377	Intron (ENST00000420770.7/5081, intron 4 of 8)	PAX7
cluster_1	chr1_186637205_186638024	17.6521638512161	6.46592505960482	5.63813422596049	2.32671026542224	0.846191716248918	Distal Intergenic	PTGS2
cluster_1	chr1_18693532_18694268	13.8784194109601	3.02388683667426	0.775156088773272	4.07254377855086	0.801200846333179	Intron (ENST00000420770.7/5081, intron 5 of 8)	PAX7
cluster_1	chr1_18702893_18703722	11.9917474926847	6.608791699397	3.61169815867399	2.66698094978037	0.838234012919074	Exon (ENST00000420770.7/5081, exon 7 of 9)	PAX7
cluster_1	chr1_18794144_18795029	8.88194612231813	3.99607879965747	2.21536783880266	3.48514996213991	0.880220491658928	Distal Intergenic	TAS1R2
cluster_1	chr1_18912970_18913597	11.581080848941	6.67175655536662	3.1342301673369	3.62119347883568	0.845860088295776	Promoter (<=1kb)	IFFO2
cluster_1	chr1_19288332_19289506	10.9893143347206	2.75665926791668	2.40678019656066	2.47733497537379	0.882189081768857	Promoter (<=1kb)	AKR7A3
cluster_1	chr1_193216840_193217418	24.0195816610456	3.33598303684773	2.58458955670514	1.30974118924613	0.893673340242763	Intron (ENST00000649895.1/79577, intron 13 of 15)	CDC73
cluster_1	chr1_19338115_19338805	22.6945589257607	5.33312206055947	2.38465693886491	2.35110436006691	0.959614528122329	3' UTR	CAPZB
cluster_1	chr1_19341194_19341846	14.4616438395754	5.62903817611303	2.59491061773292	2.56769245006659	0.963389632654663	3' UTR	CAPZB
cluster_1	chr1_19353433_19354101	20.531386678638	4.98176906755092	1.19080043189192	2.04950411264935	0.970370338222934	Intron (ENST00000264202.8/832, intron 6 of 8)	CAPZB
cluster_1	chr1_1943809_1944599	15.6167217776981	6.93314064371596	5.60864192807121	4.61343523264445	0.938081086763024	Exon (ENST00000493964.5/85452, exon 21 of 38)	CFAP74
cluster_1	chr1_195847846_195848834	20.3667231775382	5.61317990716885	2.87477441490663	1.18741815135687	0.943074939354451	Distal Intergenic	LOC105371672
cluster_1	chr1_1959723_1960660	16.2642135074818	9.03537683162822	4.66415394741304	6.15964762703001	0.87600401185721	Promoter (<=1kb)	CFAP74
cluster_1	chr1_19640307_19641065	11.4108124257352	6.90672864543036	1.88193963676312	1.49269897659566	0.735256359778081	Promoter (<=1kb)	NBL1
cluster_1	chr1_19653516_19654362	23.9407405122317	11.234704689457	4.77273256753158	7.97533747337129	0.883462225276349	Intron (ENST00000602662.1/100532736, intron 1 of 3)	NBL1
cluster_1	chr1_19665488_19666389	10.3703418223338	3.55995735276783	1.72595458837035	1.84629543951892	0.981888811998652	Promoter (<=1kb)	HTR6
cluster_1	chr1_196786018_196786997	9.38269355740944	2.09824769254735	1.98679574407394	2.1353049384747	0.85845518392211	Promoter (2-3kb)	CFHR3
cluster_1	chr1_196897026_196897964	8.80900218139402	2.65771240961303	3.96583913991851	2.64333984011516	0.733299167915117	Promoter (<=1kb)	CFHR4
cluster_1	chr1_196991734_196992656	23.2581604677367	11.2692634796693	12.9811333672283	5.03571265827539	0.667271081035293	Intron (ENST00000699466.1/81494, intron 3 of 9)	CFHR5
cluster_1	chr1_19704040_19704999	14.4090486946353	6.50783911968993	4.82341336677729	4.11469410916631	0.955066415787638	Promoter (2-3kb)	TMCO4
cluster_1	chr1_19715471_19716087	31.2372263139164	12.8597348383303	9.9232776480531	14.3605125400384	0.821398747230013	Intron (ENST00000375127.5/255104, intron 12 of 15)	TMCO4
cluster_1	chr1_19816439_19817537	14.0722660625115	2.11721444412539	0.672622545689187	1.55572753726582	0.905805830665848	Promoter (1-2kb)	RNF186
cluster_1	chr1_198314582_198315465	22.3281505668574	4.62887388380963	1.47295943481563	1.52552700342001	0.962472615849719	Intron (ENST00000538004.5/140609, intron 9 of 9)	NEK7
cluster_1	chr1_19989900_19990672	20.1254134823937	2.3642070066319	0.989114524996652	1.64614601146723	0.895193155793615	Distal Intergenic	PLA2G2A
cluster_1	chr1_200028711_200030071	14.8875382760694	9.4399700759966	9.90936407845196	5.44287195151573	0.635152637951385	Promoter (<=1kb)	NR5A2
cluster_1	chr1_200038449_200039992	34.0332776713163	16.9415296850288	11.0696791824449	5.49357508578256	0.825621726357383	Promoter (2-3kb)	NR5A2
cluster_1	chr1_200048037_200048814	34.6290586743613	5.37826148446699	6.68461153528431	2.82365277760881	0.845074107503874	Exon (ENST00000236914.7/2494, exon 4 of 7)	NR5A2
cluster_1	chr1_200364209_200365400	23.4938096812335	4.09996063726187	1.56547271786816	1.66698134741957	0.938627322141884	Intron (ENST00000637430.1/ENST00000637430.1, intron 4 of 5)	LINC00862
cluster_1	chr1_200411474_200412080	27.3421326238704	4.23013018822559	2.87107495934816	2.93207772985575	0.895246261422093	Promoter (1-2kb)	ZNF281
cluster_1	chr1_200483396_200484043	11.0883479820001	3.03828480595012	2.06031732899378	3.86405387282155	0.81193203653297	Exon (ENST00000635660.1/ENST00000635660.1, exon 1 of 2)	ZNF281
cluster_1	chr1_200802781_200803356	17.2273276200017	7.51487767808946	6.0981257721083	8.91853258971811	0.779475230208199	Intron (ENST00000358823.7/23271, intron 2 of 16)	CAMSAP2
cluster_1	chr1_200915794_200916893	14.6288764480959	3.01942288532974	1.47018753890357	2.79032971081244	0.891288084654438	Promoter (<=1kb)	MROH3P
cluster_1	chr1_201126906_201127820	10.1511254085753	4.10115059434101	3.98172904501338	2.33322874194657	0.843651329991301	Promoter (<=1kb)	ASCL5
cluster_1	chr1_201259319_201260436	16.1864287105801	2.23010617467382	1.40685530650428	2.48714842814495	0.863585495189478	Distal Intergenic	PKP1
cluster_1	chr1_201347513_201348554	18.290174994173	2.60061660605473	1.83047512310662	1.44879716750984	0.895977990207967	Distal Intergenic	TNNT2
cluster_1	chr1_201376238_201377251	42.1750004985715	9.68970303234714	2.7705944743132	1.25575586727736	0.970099866951849	Promoter (<=1kb)	TNNT2
cluster_1	chr1_201399122_201399959	13.7638904695928	12.3026785417724	5.10037359522653	3.9357084160359	0.538819192316882	Promoter (<=1kb)	LOC101929343
cluster_1	chr1_201408115_201408833	11.6308018303775	5.15797773259539	3.02089746633493	2.27423902926089	0.925234681281704	3' UTR	LAD1
cluster_1	chr1_201480264_201481151	28.1401153922127	6.97447361343895	4.11404413977417	4.66860078316711	0.934834821783183	Distal Intergenic	PHLDA3
cluster_1	chr1_201481633_201482507	32.8465398820663	16.0928085445106	8.53013984527253	6.66686701011085	0.890768025274299	Distal Intergenic	CSRP1
cluster_1	chr1_201614097_201614810	19.6310801372684	5.69748736854712	3.35960114565268	4.68670119384832	0.920867701861173	Intron (ENST00000685211.1/89796, intron 2 of 33)	NAV1
cluster_1	chr1_201676157_201676669	12.9860956450931	8.87588060388676	4.22588273609566	2.34303148381831	0.681849551554385	Intron (ENST00000685211.1/89796, intron 5 of 33)	NAV1
cluster_1	chr1_201709431_201709991	12.5531442320391	8.2893189982935	3.78489698229947	7.84123192510062	0.638891839337561	Intron (ENST00000685211.1/89796, intron 5 of 33)	MIR5191
cluster_1	chr1_202007986_202008524	25.0604271954648	10.3354910987093	2.11973623050912	2.33768141884486	0.888868566719936	Promoter (<=1kb)	ELF3
cluster_1	chr1_202009536_202010972	34.8112389003031	15.2708145477921	4.19309744113823	5.24556342269472	0.891379768611128	Promoter (<=1kb)	ELF3-AS1
cluster_1	chr1_202105476_202106175	27.0402277298537	16.2332753857323	5.23400469118824	8.45510062547098	0.77472556472293	Distal Intergenic	GPR37L1
cluster_1	chr1_202118819_202119398	15.8864289609109	9.41127533919465	4.19750671845503	5.2417992424734	0.824787102172812	Distal Intergenic	GPR37L1
cluster_1	chr1_202122549_202123120	15.2718641943865	8.24560634363103	7.19760774174662	4.55077938605364	0.815521760052651	Promoter (<=1kb)	GPR37L1
cluster_1	chr1_202135140_202135843	17.3356872542006	6.16946092396144	7.17138525236434	10.1498871625668	0.642348322537088	Promoter (<=1kb)	ARL8A
cluster_1	chr1_202154763_202155685	9.62223862096829	4.56737953699794	1.95096959236949	5.40915966862769	0.670337706121195	Promoter (2-3kb)	PTPN7
cluster_1	chr1_202184558_202185320	34.6392981441892	7.55025819650456	7.75371952027503	7.97601984209808	0.84623707467265	Promoter (<=1kb)	PTPRVP
cluster_1	chr1_202192779_202193281	13.1466562388439	6.48419319859355	4.39417713503873	5.9202510652018	0.890021314527565	Promoter (<=1kb)	LGR6
cluster_1	chr1_202213390_202214701	17.9255529693142	5.34949027215953	2.87418507472456	4.15164260777478	0.931311689535276	Promoter (<=1kb)	LGR6
cluster_1	chr1_202236990_202237503	20.4380804747872	9.669480861645	3.93319594403794	4.54996542550662	0.903827802882561	Intron (ENST00000367278.8/59352, intron 4 of 17)	LGR6
cluster_1	chr1_202711783_202712514	16.219737713869	3.87627211583211	1.27179411301556	1.1560772614734	0.974903644671973	Promoter (1-2kb)	SYT2
cluster_1	chr1_203048477_203049181	14.4759030364061	5.40702527261638	2.95366791070022	4.86838246238496	0.890165650163683	Promoter (2-3kb)	PPFIA4
cluster_1	chr1_203117514_203118199	18.6610224194873	7.85619198647935	4.75131769001737	5.7102501315238	0.963829751886823	Exon (ENST00000665660.1/ENST00000665660.1, exon 3 of 3)	ADORA1
cluster_1	chr1_203186298_203187647	7.32812142718218	2.66462286044237	1.44091865498564	2.06308161854385	0.936327026381605	Promoter (<=1kb)	CHI3L1
cluster_1	chr1_203216128_203216980	9.89067756587952	5.6725700890015	2.43980408918015	2.71952174483697	0.829881104413032	Promoter (1-2kb)	CHIT1
cluster_1	chr1_203307552_203308186	20.4978792192697	7.98520905504111	4.78063289507906	2.80871488151559	0.919489313191321	Promoter (2-3kb)	BTG2
cluster_1	chr1_203320776_203321469	12.4764970154038	4.13361093687558	2.02410646490813	3.87706489964875	0.876958040797894	Distal Intergenic	BTG2
cluster_1	chr1_203342382_203342866	14.5828718809135	5.33206346588714	2.0298303788959	2.80511013660669	0.960795821664503	Exon (ENST00000354955.5/2331, exon 3 of 3)	FMOD
cluster_1	chr1_203475239_203476065	14.4036843885949	9.51916156041038	3.91299707508472	3.22488561133175	0.723601472252756	Promoter (<=1kb)	PRELP
cluster_1	chr1_203480614_203481120	13.1455539834113	5.39927541017766	2.79181987817641	5.74763913667117	0.797108089360968	Intron (ENST00000343110.3/5549, intron 1 of 2)	PRELP
cluster_1	chr1_203487257_203488289	38.3101013168335	16.6291821946218	16.0227144266942	8.57969829670578	0.817062969589627	3' UTR	OPTC
cluster_1	chr1_203519136_203519844	27.2869603704572	4.29317858359193	2.9949262771502	8.04957118050273	0.773883333794511	Distal Intergenic	OPTC
cluster_1	chr1_204065064_204066101	14.9001302772284	5.90941495124695	4.34656945546195	4.03246042357163	0.96268693075357	Exon (ENST00000665939.1/ENST00000665939.1, exon 2 of 2)	SOX13
cluster_1	chr1_204080036_204080872	49.137137145351	13.7371734084209	3.96044856747854	2.05272092140552	0.96502112040349	Promoter (1-2kb)	SOX13
cluster_1	chr1_204084241_204084838	40.5843340652074	10.7385831003104	6.37731136352378	4.27137342379958	0.948602709727811	Intron (ENST00000367203.8/9580, intron 1 of 6)	SOX13
cluster_1	chr1_204128933_204129728	24.7222976806435	9.46207445800417	6.71231637717584	4.28848613890854	0.922517399808718	Distal Intergenic	SOX13
cluster_1	chr1_204207011_204207604	12.771757578681	7.69192317555825	3.85130460916905	5.00565005048383	0.835491587411223	Intron (ENST00000308302.4/127845, intron 1 of 4)	GOLT1A
cluster_1	chr1_204213640_204214713	17.7393946138728	5.70745878893097	5.55043811475371	6.53134267965996	0.828388448587288	Promoter (<=1kb)	GOLT1A
cluster_1	chr1_204287923_204288622	13.9315648180498	4.74301541068219	4.45198037357312	2.67834465463476	0.875148183600713	Intron (ENST00000272203.8/22874, intron 1 of 22)	PLEKHA6
cluster_1	chr1_204307304_204307919	20.4880151419804	5.14393981811013	1.87986593834391	2.90835579713975	0.955651135771909	Promoter (<=1kb)	PLEKHA6
cluster_1	chr1_204377604_204378685	15.5210800876137	8.61000239494671	4.8845437098991	4.45838215328553	0.877960032411273	Promoter (<=1kb)	PLEKHA6
cluster_1	chr1_204398410_204398945	10.553445568086	6.5278105263536	2.08044704674345	6.18276319980417	0.623307903566132	Promoter (2-3kb)	PPP1R15B
cluster_1	chr1_204481469_204482419	9.64893831325326	5.34196948436757	2.91979989434486	2.04694984319927	0.828107197961811	Intron (ENST00000367187.7/5287, intron 2 of 33)	PIK3C2B
cluster_1	chr1_204576173_204576880	13.9595195186731	6.24336641052579	1.80249090609527	2.77371531944783	0.89180468829495	Distal Intergenic	LOC105371692
cluster_1	chr1_204692344_204693217	9.60439157104824	2.91620993819108	0.960435162535783	1.3527533740119	0.97473063211707	Distal Intergenic	LRRN2
cluster_1	chr1_204710121_204711150	26.6357898366392	12.6144503719831	6.93117470040473	5.06439938858034	0.896312501793032	Distal Intergenic	LRRN2
cluster_1	chr1_20473089_20473740	10.924923076152	8.11460253088732	2.58697670529297	4.87078555934644	0.642435251886596	Distal Intergenic	CAMK2N1
cluster_1	chr1_204923855_204924672	23.268347518118	3.03926549496252	3.98402214004818	9.19830557646769	0.67809460116507	Intron (ENST00000404977.6/23114, intron 2 of 25)	NFASC
cluster_1	chr1_2049411_2050950	35.0633687664665	17.4869490725745	4.15924049017611	6.11868723827934	0.835757339837603	Promoter (<=1kb)	PRKCZ-DT
cluster_1	chr1_204991168_204991880	19.8609379900758	6.78712119833944	9.85158863023749	6.20113852639221	0.718234312032437	Promoter (2-3kb)	NFASC
cluster_1	chr1_205061311_205062206	13.7906286511103	6.83610386732123	4.11124255390862	4.92245303805217	0.946124726011514	Promoter (<=1kb)	CNTN2
cluster_1	chr1_205300593_205302065	41.2643267206211	36.5000639035035	14.9515270439517	16.9739425792072	0.559511074931879	3' UTR	NUAK2
cluster_1	chr1_205375884_205376612	19.4992897633447	8.98494359339324	3.73829632685018	8.34921163934859	0.795823637319154	Promoter (2-3kb)	LEMD1-AS1
cluster_1	chr1_205444628_205445536	49.3341187739203	17.8052387811937	12.5174047881535	13.3483263284331	0.951867256071986	Promoter (2-3kb)	MIR135B
cluster_1	chr1_205448457_205449034	40.2944812810023	23.8904306025006	5.23198362463051	2.85121938277399	0.724624887378793	Promoter (<=1kb)	MIR135B
cluster_1	chr1_205477158_205478338	8.02888618386898	1.57000712185387	1.31462954232755	5.15267093381481	0.53531447065563	Distal Intergenic	BLACAT1
cluster_1	chr1_205485219_205485953	20.0908198968502	9.61312650157766	6.4308892237905	10.2660207786316	0.796960099781494	Distal Intergenic	CDK18
cluster_1	chr1_205504244_205505582	22.8806570184918	11.9724732152206	4.31507038318769	8.08684961330089	0.826910980579624	Promoter (<=1kb)	CDK18
cluster_1	chr1_205528666_205529463	18.0484562009638	10.8949317253073	7.03288245096692	10.5916241709563	0.769972232777183	Promoter (<=1kb)	CDK18
cluster_1	chr1_205591754_205592887	20.0636566312042	10.3741395067326	8.67426901697209	8.64437692013465	0.962192990737349	Promoter (<=1kb)	MFSD4A
cluster_1	chr1_205672064_205672461	30.7322184808535	9.08382401733969	1.83326276885408	2.90258272544719	0.970580349569335	Intron (ENST00000367145.4/85414, intron 1 of 4)	SLC45A3
cluster_1	chr1_205701015_205701792	9.97820990535385	5.96810763628233	3.0929729359008	2.04740879370571	0.777548722922657	Distal Intergenic	NUCKS1
cluster_1	chr1_205711101_205711843	13.2710747472464	7.01521476175621	2.73339767821418	5.73466737558435	0.784739298240716	Distal Intergenic	NUCKS1
cluster_1	chr1_206469831_206471733	14.922054515896	6.60753824332028	3.74491757901515	6.1473189216149	0.858799130441996	Promoter (<=1kb)	IKBKE
cluster_1	chr1_206500999_206501710	6.10220351784869	2.05059070705655	2.03413075271261	2.58622268746903	0.790650902571343	Distal Intergenic	C1orf147
cluster_1	chr1_206506941_206508337	16.9908125693668	7.50805124015716	5.84936552457015	8.22017808967127	0.82330627985482	Promoter (<=1kb)	RASSF5
cluster_1	chr1_206544531_206545196	14.7581401027881	4.15689286911659	2.99445534628881	3.08257338517382	0.925750140193768	Exon (ENST00000624347.1/ENST00000624347.1, exon 1 of 1)	RASSF5
cluster_1	chr1_206631127_206631454	18.9208428159305	4.49704717950184	4.64425208868936	6.89999672335934	0.767896477579382	Distal Intergenic	DYRK3-AS1
cluster_1	chr1_206658199_206659424	8.58265592836646	4.59515729993975	3.90162815795751	2.12991792147339	0.785907225525018	Intron (ENST00000489878.1/8444, intron 3 of 3)	DYRK3
cluster_1	chr1_206687796_206688359	25.3736750717844	6.5124170743417	3.31881021612741	5.0852991828269	0.922531711587056	Promoter (2-3kb)	MAPKAPK2
cluster_1	chr1_206694456_206695111	12.4379029802055	5.62335424560638	1.83443772935597	1.89054854483356	0.888363849207571	Intron (ENST00000367103.4/9261, intron 1 of 9)	MAPKAPK2
cluster_1	chr1_207024876_207025596	10.2202031848671	3.56056625477388	2.03420797407641	1.73047216237786	0.971722011042146	5' UTR	C1orf116
cluster_1	chr1_207032393_207033141	32.5771501975217	5.34132326473278	1.26625115285492	1.65103248822994	0.946395424005248	Promoter (<=1kb)	C1orf116
cluster_1	chr1_20722365_20722829	23.5150485557588	4.77285725463422	1.8604569159801	1.62817293587806	0.954539469134308	Exon (ENST00000444387.7/400745, exon 9 of 10)	KIF17
cluster_1	chr1_207320812_207322409	30.4998114172617	25.095793817821	15.7445515648581	10.7634949688771	0.597166884346257	Promoter (<=1kb)	CD55
cluster_1	chr1_207453996_207455385	14.5511195079609	6.72938458675702	4.28679486122593	4.03832993998086	0.964810026846067	Promoter (<=1kb)	CR2
cluster_1	chr1_207495785_207497011	11.6217906377483	7.27682907349538	5.49442429964248	4.42165427547242	0.847525556642039	Promoter (<=1kb)	CR1
cluster_1	chr1_207633676_207634318	27.5197744424506	0.0759239068156713	0.344261477410166	1.79668095072535	0.825588931537257	Intron (ENST00000400960.7/1378, intron 38 of 38)	CR1L
cluster_1	chr1_207910606_207911434	10.4780654501738	3.15291382842178	3.35170202977444	5.11004813413683	0.703032020854383	Promoter (<=1kb)	CD34
cluster_1	chr1_207959068_207959804	15.6098189885335	10.9904781477739	5.466397249726	4.43400669274959	0.706561087813091	Promoter (<=1kb)	LINC02767
cluster_1	chr1_208131780_208132590	12.7130149084161	7.87450137699996	2.784897707653	3.37323179781949	0.766415449120968	Intron (ENST00000367033.4/5362, intron 4 of 31)	LOC105372887
cluster_1	chr1_208654220_208654857	6.13407904424774	3.51903102237592	0.813105383537791	2.73606412039438	0.698267990295079	Distal Intergenic	LINC02769
cluster_1	chr1_2091551_2092399	11.5476686152435	4.16387001047612	1.82629947822073	2.72995080659494	0.950695468594038	Intron (ENST00000378567.8/5590, intron 4 of 17)	PRKCZ
cluster_1	chr1_209155228_209156031	11.4517227281761	4.3531084758198	5.12282743272185	2.22801233505069	0.755005711600949	Exon (ENST00000665387.1/ENST00000665387.1, exon 3 of 6)	LOC105372895
cluster_1	chr1_209198873_209200271	12.7078287570695	3.77478926133089	4.02306015251055	3.7996820259643	0.842015862844115	Intron (ENST00000666483.1/105372896, intron 2 of 3)	LOC105372896
cluster_1	chr1_209427861_209428955	23.5671211983873	16.17092675784	2.59036486125392	1.54471235865518	0.649258477249367	Promoter (<=1kb)	MIR205HG
cluster_1	chr1_209652842_209653545	15.0185841922956	2.83418245578632	1.55613787185471	2.13879421876919	0.908317257599627	Promoter (<=1kb)	LAMB3
cluster_1	chr1_209747480_209748489	32.9286294212672	12.1262057327009	12.9593496579729	9.73853759995433	0.846905983236797	Distal Intergenic	TRAF3IP3
cluster_1	chr1_209805444_209806675	36.1820753061636	9.07014141878218	1.55289306369778	2.30917228114201	0.980990071554651	Promoter (<=1kb)	C1orf74
cluster_1	chr1_210373336_210374715	30.8031866887929	6.48801119526702	4.60518655508593	4.05219999281423	0.913695015557972	Exon (ENST00000364102.1/ENST00000364102.1, exon 1 of 1)	HHAT
cluster_1	chr1_211398277_211400547	9.54209357597618	6.38950739398141	2.25632248898844	1.7776498189127	0.700006114901898	Promoter (<=1kb)	LINC00467
cluster_1	chr1_211416154_211417203	17.0775877265015	4.98260676584251	4.29871811048921	2.51243386143041	0.897437360114393	Exon (ENST00000441817.2/ENST00000441817.2, exon 1 of 2)	LINC00467
cluster_1	chr1_211515145_211515938	16.1700543618524	11.7753306979087	9.51053261919484	3.87317252301589	0.57876096460885	Distal Intergenic	RD3
cluster_1	chr1_211630103_211630776	10.6084374642107	3.46802083332589	3.11322881849839	3.23943854232986	0.883938290856314	Distal Intergenic	NTRAS
cluster_1	chr1_211698389_211699484	11.6385269376865	7.25352232247751	4.9678082104712	4.27002501725529	0.853203092853269	Distal Intergenic	NEK2-DT
cluster_1	chr1_212629962_212630965	14.4162727452142	5.62805122405271	6.49534291326297	6.76106194484562	0.76607347859147	Distal Intergenic	GARIN4
cluster_1	chr1_212759780_212760713	10.4564862796059	1.16883932548007	1.41400397436217	1.38362089450109	0.836149058569344	Intron (ENST00000366978.5/25936, intron 4 of 4)	NSL1
cluster_1	chr1_21289684_21290674	18.7179993728152	12.9849044466356	5.72205286195491	6.8097786020126	0.731426027988543	Promoter (<=1kb)	ECE1
cluster_1	chr1_212908167_212908909	18.2608634739092	2.61605855920387	0.837201188957719	1.06577454333102	0.926260505514881	Distal Intergenic	FLVCR1
cluster_1	chr1_212909742_212910581	25.6165040089613	0.432676576520013	0.264607413925125	0.814041063890191	0.851554610200187	Distal Intergenic	FLVCR1
cluster_1	chr1_212914698_212915699	20.9296250395853	8.16025646614623	7.02786296891447	3.48516146310992	0.8569367867964	Distal Intergenic	FLVCR1
cluster_1	chr1_212916544_212917340	28.7213808942045	7.0085242170745	5.06646850699899	3.61592840518961	0.924353887964372	Exon (ENST00000632866.1/ENST00000632866.1, exon 1 of 3)	FLVCR1
cluster_1	chr1_212928535_212929443	14.0672602108626	5.92963109215309	5.64563197201116	3.3913344040955	0.846042969300226	Distal Intergenic	VASH2
cluster_1	chr1_21334251_21335313	12.3847618077648	6.89010403772791	3.34221986456838	2.6882203105744	0.830544194191155	Intron (ENST00000415912.6/1889, intron 1 of 18)	ECE1
cluster_1	chr1_213670086_213670945	19.2388808136499	1.44094467348608	1.84065771804742	1.05310152871068	0.850905109722586	Distal Intergenic	NA
cluster_1	chr1_213979649_213980401	19.5430756309371	4.88144008920313	5.91122033013713	3.96877383854383	0.828400673681454	Promoter (<=1kb)	PROX1-AS1
cluster_1	chr1_214289559_214290312	16.255495835094	6.47617298088137	3.90996230267987	2.02073742792006	0.900565606580202	Intron (ENST00000491455.5/56950, intron 1 of 10)	SMYD2
cluster_1	chr1_214316447_214317088	20.6806768169034	4.72006426983434	1.75858588151154	1.47899809155455	0.967210999896661	Intron (ENST00000491455.5/56950, intron 3 of 10)	SMYD2
cluster_1	chr1_21436583_21437556	15.5094013237546	5.86579510465313	4.11051598544734	1.45704756353415	0.864603450526148	Promoter (2-3kb)	NBPF3
cluster_1	chr1_214404470_214405354	13.3101150626549	3.66730712846166	1.99053955233331	2.0142163673169	0.960665969008632	Intron (ENST00000366956.10/5784, intron 5 of 18)	PTPN14
cluster_1	chr1_214446678_214447468	22.2909590180006	9.06090261940497	2.07200428912333	2.11012372637127	0.897175020949031	Intron (ENST00000366956.10/5784, intron 3 of 18)	PTPN14
cluster_1	chr1_214514062_214515013	8.06876796638609	3.7017425802471	3.56243090309442	2.02694087981518	0.814360210554663	Intron (ENST00000366956.10/5784, intron 1 of 18)	PTPN14
cluster_1	chr1_21508913_21510586	23.2900652849291	15.2512588142815	6.61896982361212	6.5277738199109	0.751021719062285	Promoter (<=1kb)	ALPL
cluster_1	chr1_21607487_21608385	77.2071767593739	36.4375954203851	17.814496663831	13.5634907856818	0.891562582754778	Exon (ENST00000374763.6/5909, exon 14 of 23)	RAP1GAP
cluster_1	chr1_21622219_21623023	18.6291972733643	13.1445465227906	5.03760223893288	5.2147569334138	0.694512162699093	Promoter (<=1kb)	RAP1GAP
cluster_1	chr1_21668808_21670142	19.8583584551474	7.36887240623422	6.46041269203351	9.7121803725463	0.75696574830682	Promoter (<=1kb)	RAP1GAP
cluster_1	chr1_217134961_217135685	18.1059541305495	8.87342510010381	7.32940812252756	3.91501563203667	0.819011925686783	Promoter (2-3kb)	ESRRG
cluster_1	chr1_2174138_2174861	15.487057567872	4.93999134717098	3.81352265850963	5.8364062316624	0.825128134039403	Exon (ENST00000378567.8/5590, exon 15 of 18)	PRKCZ
cluster_1	chr1_21764575_21765387	7.13847357863543	1.75277474171515	0.846512344577065	4.40458849414069	0.561577518200992	Intron (ENST00000308271.14/84196, intron 1 of 26)	USP48
cluster_1	chr1_21782042_21784221	43.2541803260141	28.2349513450085	16.9377889910078	29.6089797768487	0.643847847686256	Promoter (<=1kb)	USP48
cluster_1	chr1_21814238_21814888	28.621120962262	7.7241481324844	3.50679177151476	2.72718256799364	0.970250792383944	Promoter (1-2kb)	LDLRAD2
cluster_1	chr1_218346733_218347586	14.6441827328602	6.80588338210387	6.57078458840643	5.713787077565	0.890511871634671	Promoter (<=1kb)	TGFB2
cluster_1	chr1_21913100_21913660	17.9162830487472	5.26060653009891	1.29876864882526	3.45279676079587	0.925375748389138	Intron (ENST00000374695.8/3339, intron 1 of 96)	HSPG2
cluster_1	chr1_21922264_21923051	14.0760774589279	9.17494466231308	0.624458689059954	1.53199951415342	0.672529911337948	Intron (ENST00000374695.8/3339, intron 1 of 96)	HSPG2
cluster_1	chr1_21933584_21934018	15.2304266678066	8.35357389107392	1.27948518984065	4.39454325787933	0.758198155362742	Intron (ENST00000374695.8/3339, intron 1 of 96)	HSPG2
cluster_1	chr1_21944232_21945024	22.606230749118	7.0632784443428	2.14185350387396	1.28905047102133	0.955131207745184	Distal Intergenic	HSPG2
cluster_1	chr1_21956653_21957305	7.37159653301743	1.17537388356869	1.38357596354358	2.20534062629447	0.76457194071564	Exon (ENST00000637118.1/ENST00000637118.1, exon 1 of 2)	HSPG2
cluster_1	chr1_21963577_21964368	12.0653151018307	6.60893937703777	2.95680477917326	4.04132876739903	0.860081011822401	Distal Intergenic	CELA3B
cluster_1	chr1_219834202_219834863	16.3863969022246	0.991028971712974	1.04440075609049	2.99293590165675	0.790835178022227	Intron (ENST00000484239.5/105372926, intron 4 of 8)	SLC30A10
cluster_1	chr1_2199112_2199773	30.3632090200185	11.9422429983746	6.21047306614009	15.4248021734965	0.712677549908784	Promoter (<=1kb)	FAAP20
cluster_1	chr1_220338542_220339594	20.3471302197268	1.17421709850557	1.05545162833415	1.3894584782248	0.852926955635507	Distal Intergenic	RAB3GAP2
cluster_1	chr1_2204359_2206008	29.3668491821297	16.5376189004984	13.9909269820415	9.13491442638338	0.814762323061449	Promoter (<=1kb)	FAAP20
cluster_1	chr1_220810117_220810801	16.615809274261	5.01191139617286	7.03463391778511	4.71630974986761	0.759239793349866	Promoter (<=1kb)	MTARC1
cluster_1	chr1_22131866_22132462	10.8629438721885	6.62774917333577	2.41359348796758	4.24105533891407	0.765943881221116	Promoter (2-3kb)	WNT4
cluster_1	chr1_221715249_221716128	23.701096909775	2.85353490848243	4.20010474026525	3.9105003251352	0.810457889845958	Intron (ENST00000366899.4/11221, intron 2 of 3)	DUSP10
cluster_1	chr1_22264357_22265520	9.52738404847907	8.81741828507214	1.6344370707783	1.92911780838739	0.513970635679402	Promoter (<=1kb)	MIR4418
cluster_1	chr1_222736378_222736923	16.9323697225114	2.36498315506489	3.99338695479382	2.34427774237112	0.797704929598994	Promoter (<=1kb)	FAM177B
cluster_1	chr1_222928053_222928655	17.1235961226989	13.8651768482947	9.15831933722039	5.60821144880756	0.591549396139395	Promoter (<=1kb)	DISP1
cluster_1	chr1_223022497_223023542	23.630597285296	9.66698090634256	11.2272683891053	3.95390237152069	0.717673748174594	Distal Intergenic	LOC102724046
cluster_1	chr1_223029797_223031355	19.9833069709321	3.6479149319942	2.22141104131755	2.98454221190301	0.897560384544844	Distal Intergenic	LOC102724046
cluster_1	chr1_224164473_224165350	14.5905581340018	1.93777644819675	1.47159607402552	1.17417001262854	0.887635482804603	Distal Intergenic	DEGS1
cluster_1	chr1_224203279_224204099	13.0322624615639	3.92100237782346	3.81942355391074	2.52972882170355	0.877047414944501	Distal Intergenic	LOC101927143
cluster_1	chr1_224213237_224214256	7.55540926316961	3.09846007576874	1.3070980789254	2.13598697568992	0.920418078634929	Promoter (<=1kb)	LOC101927143
cluster_1	chr1_224340414_224341387	10.3770635091871	5.12348577414169	2.72371813180291	3.86263288740002	0.902840549779018	Distal Intergenic	NVL
cluster_1	chr1_224498053_224499048	22.658930244696	4.24355002210745	5.7751949202189	4.49127520600809	0.811592291251009	Intron (ENST00000471578.5/149111, intron 1 of 5)	CNIH3
cluster_1	chr1_224851458_224852383	12.8978749951763	3.40205404253815	3.01699257659475	3.77870543402832	0.849112115649812	Intron (ENST00000657178.1/105373108, intron 1 of 3)	LOC105373108
cluster_1	chr1_224880463_224881129	13.1713264207166	7.2368918105245	5.0437773844631	1.38468130512511	0.716825612464645	Promoter (<=1kb)	LOC105373108
cluster_1	chr1_22556230_22557097	18.7066781445711	9.4013212472078	3.64428982083047	2.80701468575277	0.845607432346621	Distal Intergenic	EPHA8
cluster_1	chr1_225677170_225678125	16.7131394645409	6.61014901649512	4.7560987126564	5.88150237914245	0.919512180115318	Distal Intergenic	LOC102723834
cluster_1	chr1_225845553_225846276	25.5364227276077	11.4742012803836	3.24086092947415	4.47321402541057	0.88785245407996	Promoter (<=1kb)	TMEM63A
cluster_1	chr1_225898858_225899962	32.0554421138631	5.37950173603556	2.24575325277907	1.60703775902336	0.936994585647031	Intron (ENST00000432920.2/10637, intron 5 of 7)	LEFTY1
cluster_1	chr1_225911095_225911832	14.9676030973005	3.16305686929271	1.75564355663689	2.68765084761215	0.90221084714012	Promoter (<=1kb)	LEFTY1
cluster_1	chr1_22593018_22593827	17.5986496952392	3.54638748947064	1.80349521418692	2.08605140899392	0.930548284591426	Exon (ENST00000166244.8/2046, exon 6 of 17)	EPHA8
cluster_1	chr1_225939169_225940071	16.5566924876162	5.33921999655994	2.36583310563	2.23325979419426	0.979669082311658	Promoter (<=1kb)	LEFTY2
cluster_1	chr1_226127742_226128310	12.9092399915217	5.27501862421469	2.40210923187802	2.31351001147326	0.94992332354225	Distal Intergenic	ACBD3-AS1
cluster_1	chr1_226196825_226197418	19.8591346975978	5.38459339656853	4.26147427695379	5.76457675671061	0.861822505137445	Distal Intergenic	ACBD3
cluster_1	chr1_226223147_226224338	19.4730465771179	10.7845244162268	7.48374769892217	4.79719144085404	0.827240440419026	Promoter (<=1kb)	MIXL1
cluster_1	chr1_226404800_226405718	31.4439711378039	2.86719372726796	0.752131673374512	2.13656365034939	0.887970381458598	Promoter (2-3kb)	PARP1
cluster_1	chr1_226604370_226605078	10.2666887113183	4.76476039173996	2.6684337533866	3.07846840780158	0.956357575862726	3' UTR	STUM
cluster_1	chr1_22662308_22662895	19.3317997660599	4.58656298762757	4.93850767288175	3.43189624933143	0.857919694995668	Promoter (2-3kb)	C1QB
cluster_1	chr1_226653844_226654522	17.76225597017	11.3032484553554	5.16219443442074	3.9565778521984	0.749095031147566	Intron (ENST00000272117.8/3707, intron 2 of 7)	ITPKB-IT1
cluster_1	chr1_226679791_226680715	31.3827371366187	24.8777865934398	9.59504885317252	8.85976028865224	0.618031690355323	Intron (ENST00000272117.8/3707, intron 2 of 7)	ITPKB-IT1
cluster_1	chr1_227356405_227357107	19.6212260097754	3.20705872147419	2.10625980105156	2.16376660033792	0.90046228073133	Distal Intergenic	LINC01641
cluster_1	chr1_227727960_227729073	19.7347784106073	10.7688862470899	8.44491704451004	9.85448118887663	0.921191748189381	Promoter (<=1kb)	SNAP47
cluster_1	chr1_227793644_227794338	16.1095296108399	7.32834759397295	4.75952516310795	2.2816863279223	0.852627214367251	Distal Intergenic	LOC105373289
cluster_1	chr1_22780655_22781362	22.6400707748352	16.2178591277194	5.05872091727192	4.33916239629706	0.659045782177838	Intron (ENST00000544305.5/2048, intron 1 of 6)	EPHB2
cluster_1	chr1_227886708_227888445	12.8859513486613	9.00326936563395	6.88096137191444	4.71843947037779	0.721729001017713	Distal Intergenic	MIR5008
cluster_1	chr1_2278872_2279943	33.1214171882496	8.20945998855654	6.3764493806845	11.8792728941314	0.784389256907513	Intron (ENST00000378536.5/6497, intron 1 of 6)	SKI
cluster_1	chr1_228004297_228005085	14.4721982771846	4.9532328620477	2.75050822807501	3.10260798704492	0.973344661704406	Promoter (1-2kb)	WNT3A
cluster_1	chr1_228059147_228061109	40.3213219457703	5.50281388867786	4.42524369725233	6.61409674654988	0.851038829554234	3' UTR	LINC02809
cluster_1	chr1_228130554_228131569	12.2474621073226	5.44331416778748	3.74481771876374	4.244833814378	0.964276342271043	Distal Intergenic	GUK1
cluster_1	chr1_228173850_228174858	10.5066096460508	4.04611451155639	3.39116066181309	1.9858495414579	0.885986671298402	Promoter (<=1kb)	IBA57
cluster_1	chr1_228212560_228213956	32.7593987512627	17.0891809850267	10.3610192465878	12.871020208166	0.926664999004736	Promoter (<=1kb)	OBSCN-AS1
cluster_1	chr1_228378006_228379492	18.3526953846251	13.9560592485981	7.88217021500516	8.80783351882978	0.715193939838425	3' UTR	OBSCN
cluster_1	chr1_228415887_228417078	14.5140150585104	11.1620459066179	6.37273424720855	4.08152418246701	0.631883671996811	Promoter (<=1kb)	TRIM17
cluster_1	chr1_228646628_228648461	12.4494865858644	7.93523685531771	4.25280603731377	8.60214102285198	0.609062256901122	Promoter (<=1kb)	RNA5S17
cluster_1	chr1_229092186_229093019	11.1082818896388	3.85473418490909	3.8548639087436	2.18894656717587	0.851739138555656	Promoter (1-2kb)	LINC02814
cluster_1	chr1_229093547_229094327	21.8912883896563	5.85711217054021	1.18005871757037	0.647721329400979	0.969502881764292	Promoter (<=1kb)	LINC02814
cluster_1	chr1_229229250_229230977	10.8578714262576	5.82093120960196	1.94514538758555	3.09193586154036	0.832166483502661	Intron (ENST00000651412.1/102723935, intron 2 of 3)	LOC102723935
cluster_1	chr1_229257993_229259059	7.93599896592342	3.47539712156502	1.79879556971503	5.38444881801172	0.571208033092276	Exon (ENST00000654028.1/105373159, exon 2 of 2)	TMEM78
cluster_1	chr1_22953051_22954273	6.27479552580024	1.89286100157017	1.91868009794484	1.17052921525863	0.863658693129527	Exon (ENST00000426928.7/646262, exon 8 of 8)	LACTBL1
cluster_1	chr1_229715849_229716774	9.85354517997612	2.35868797171201	2.25365951097459	2.04179899485688	0.873095336301518	Distal Intergenic	URB2
cluster_1	chr1_22976332_22977036	13.9948872188827	6.85287842503252	3.14411049671773	4.53597217314175	0.898901190528834	Distal Intergenic	LACTBL1
cluster_1	chr1_230381579_230382675	14.4359328475706	3.05434234015483	2.63720836140408	2.91785376245077	0.872148624551954	Intron (ENST00000391860.7/79605, intron 1 of 6)	PGBD5
cluster_1	chr1_230753395_230754314	16.5390927216125	4.3461102380047	5.64630954108536	6.40507101946113	0.744876564282416	Intron (ENST00000366666.6/10753, intron 1 of 17)	CAPN9
cluster_1	chr1_2311366_2311900	21.5931432721089	11.6946947215161	7.21906232871938	4.45895795348084	0.826084680092117	Distal Intergenic	SKI
cluster_1	chr1_2314183_2315400	21.1971694157783	15.0740671162723	7.47868032882668	7.55766321172346	0.725330752990434	Exon (ENST00000659232.1/ENST00000659232.1, exon 1 of 4)	SKI
cluster_1	chr1_231806385_231807277	15.0128607223033	4.48902022211348	2.54257689669646	3.25082582253511	0.943736710185094	Intron (ENST00000646525.1/100303453, intron 11 of 11)	DISC1
cluster_1	chr1_23216680_23217930	16.4717315229838	10.9642712006986	4.80094185416251	2.23183326618494	0.681829777683007	Promoter (<=1kb)	HTR1D
cluster_1	chr1_233289518_233290225	20.3027631610856	1.03734996931421	1.57592850331675	1.22220012061612	0.839914261069575	Intron (ENST00000258229.14/80003, intron 1 of 33)	PCNX2
cluster_1	chr1_233326869_233328902	27.4184396244466	11.5051394738727	8.55495473786768	10.0132086819756	0.931549281608521	Promoter (<=1kb)	MAP3K21
cluster_1	chr1_23357417_23358070	12.8481015693483	3.98978069924373	1.85136887894739	2.62734605181687	0.955419699205863	Distal Intergenic	ZNF436
cluster_1	chr1_233730630_233731522	11.972666119784	1.35680211192496	0.976036992286962	1.89684149411441	0.842276454433815	Exon (ENST00000651271.1/ENST00000651271.1, exon 3 of 3)	KCNK1
cluster_1	chr1_23394719_23395654	13.6969737833417	12.1052614355316	2.87340849950144	1.71578129781163	0.531632483362754	Intron (ENST00000450454.7/6920, intron 7 of 10)	TCEA3
cluster_1	chr1_234214012_234215587	14.4078962621178	6.13244701438456	8.10251426041741	4.84696791827962	0.703082374390904	Promoter (<=1kb)	SLC35F3
cluster_1	chr1_23424179_23425325	10.4123214349045	5.61115214570335	3.58926789001022	3.37374453181487	0.923944586187929	Promoter (<=1kb)	TCEA3
cluster_1	chr1_234250588_234251411	11.4222971028808	9.79691540706907	3.55341070996687	1.78766511912335	0.545496453669054	Intron (ENST00000366618.8/148641, intron 3 of 7)	LOC105373206
cluster_1	chr1_23436421_23437385	33.7914670847166	3.85786633056042	1.15409159140542	1.67703419956837	0.910976218684956	Promoter (<=1kb)	ASAP3
cluster_1	chr1_235199382_235200274	10.7250894522954	3.95520870975104	2.62880219722238	1.71718250758973	0.934560917683058	Intron (ENST00000366603.6/51742, intron 17 of 23)	ARID4B
cluster_1	chr1_235357414_235358215	7.34608657976027	6.36680068998317	1.89652971645109	1.34391455643388	0.547053191168144	Intron (ENST00000643418.1/6905, intron 1 of 7)	TBCE
cluster_1	chr1_23539573_23540371	19.3192486135076	10.5741141993121	5.72132463292538	10.1802625310607	0.76548525973704	Distal Intergenic	E2F2
cluster_1	chr1_23555802_23556523	52.0569781180547	13.4018735980517	2.61444518027001	4.28804995136556	0.978540249360429	Promoter (2-3kb)	ID3
cluster_1	chr1_23598159_23599064	48.3285675641963	13.9106107952498	3.86125896893354	3.67751505324843	0.977107917308757	Intron (ENST00000477916.5/259283, intron 2 of 6)	LOC107984928
cluster_1	chr1_23619420_23620177	19.2091405645009	6.49697117038796	1.86943086646283	3.02527386190647	0.957859237016716	Intron (ENST00000477916.5/259283, intron 2 of 6)	MDS2
cluster_1	chr1_23637294_23638339	13.7883696027569	6.86206416016413	2.2660830425199	3.34679325312216	0.864135660867132	Intron (ENST00000477916.5/259283, intron 5 of 6)	MDS2
cluster_1	chr1_236502993_236503742	20.264075442409	6.13541677598925	5.34770392801175	5.09655307855238	0.89884455749143	Downstream (<=300bp)	LGALS8
cluster_1	chr1_237031713_237032552	19.9115625808718	3.17713864326911	2.52044095749101	2.55612572025151	0.882072197235747	Distal Intergenic	RYR2
cluster_1	chr1_23837916_23838932	9.52811151145682	6.20346051701575	2.81410511828404	6.29946809285395	0.60749703297234	Promoter (<=1kb)	HMGCL
cluster_1	chr1_23867630_23868902	22.9855141365319	19.255945042366	9.54128559298795	17.5104770237088	0.513922521617633	Promoter (<=1kb)	FUCA1
cluster_1	chr1_239814235_239814902	13.2685323054175	3.19449326694515	2.17842199117192	3.48826940964256	0.861477620509526	Intron (ENST00000468573.5/1131, intron 6 of 8)	CHRM3
cluster_1	chr1_239997310_239998310	11.4696364516207	4.28730572490938	5.32221205422434	2.3875192484834	0.741675813019784	Distal Intergenic	FMN2
cluster_1	chr1_240492680_240493544	19.9739722710387	6.84733245435986	4.46599882911081	3.02681357368172	0.944617456380555	5' UTR	FMN2
cluster_1	chr1_240526000_240526866	5.801718829268	1.32773128647738	1.99381176215724	3.7663234281498	0.532152753898736	Intron (ENST00000318160.5/64388, intron 1 of 1)	FMN2
cluster_1	chr1_24070770_24071474	12.8217331697234	7.80736255958748	3.01017347274469	5.07862768625254	0.774331388305622	Exon (ENST00000374434.4/127294, exon 25 of 37)	MYOM3-AS1
cluster_1	chr1_24112114_24112919	14.4470300508466	5.18036150322156	4.70785593746255	5.51182763404792	0.853028453858612	Promoter (<=1kb)	MYOM3
cluster_1	chr1_2413702_2414770	14.5733034769699	8.20882246399234	4.80199262144427	7.32628852859897	0.81982665414754	Promoter (<=1kb)	PEX10
cluster_1	chr1_24150270_24151866	27.5948999695616	9.46348227159704	2.77008502802571	3.99017728240731	0.9603273668714	Distal Intergenic	IL22RA1
cluster_1	chr1_24186924_24188042	18.5972442633745	6.55079019294512	3.58355992295765	7.02771150433637	0.830653175290214	Promoter (<=1kb)	IFNLR1
cluster_1	chr1_24286453_24287273	12.2751995111515	9.69235247303358	1.79114835857867	0.943621183086008	0.582596785727723	Intron (ENST00000690803.1/57822, intron 2 of 15)	GRHL3
cluster_1	chr1_24308219_24309030	18.5655729494529	5.21716459436676	1.56888996281652	1.57540746797754	0.980897022032225	Exon (ENST00000437965.1/105376871, exon 4 of 5)	GRHL3
cluster_1	chr1_24319121_24319762	20.2490471972414	14.5815930583845	2.32993894584782	2.52472784708341	0.634443137834578	Promoter (<=1kb)	GRHL3
cluster_1	chr1_24413274_24414094	19.9631638808738	18.3055488155887	4.54564846219512	10.0375365508809	0.506960831319928	Promoter (<=1kb)	STPG1
cluster_1	chr1_24415171_24416326	34.4733953824317	20.2747877463267	13.2341657897982	24.7227838176723	0.604972442676508	Promoter (<=1kb)	NIPAL3
cluster_1	chr1_244163714_244164470	9.67467730986358	4.19386528133141	2.14208117327511	3.80458371733372	0.855650235782992	Distal Intergenic	NA
cluster_1	chr1_244461062_244461991	31.1768604709871	10.2639424916386	11.9515341367666	6.88203967572298	0.811791445774145	Promoter (<=1kb)	CATSPERE
cluster_1	chr1_24463601_24464333	14.0134265536504	3.1725603138212	1.36294143427083	3.21315346831002	0.873804882471539	3' UTR	NIPAL3
cluster_1	chr1_244729969_244731156	9.92723743924328	7.95894361165347	6.81632791473105	3.72844944792462	0.546132821849284	Promoter (<=1kb)	LOC122455338
cluster_1	chr1_244815170_244816253	16.254139651029	1.31672850214335	1.31749422602194	2.07880062587867	0.833859688217137	Distal Intergenic	COX20
cluster_1	chr1_24555525_24556275	11.2601902615781	9.79848837604979	3.649658911582	2.19877006810679	0.543243255989118	Promoter (<=1kb)	NCMAP-DT
cluster_1	chr1_24559090_24559854	12.3398277726244	2.39470881575127	0.722305905593538	1.94648724312348	0.904853777098157	Intron (ENST00000374392.3/400746, intron 1 of 3)	NCMAP
cluster_1	chr1_246753788_246754398	16.1700400802861	5.84111661676316	8.19490769049168	5.43719361204955	0.722891231818651	Intron (ENST00000366510.4/51097, intron 5 of 11)	LINC01341
cluster_1	chr1_246788809_246789846	10.849819254565	3.05125635841978	3.45633115779458	1.81522679978703	0.832777451176763	Promoter (<=1kb)	LINC01341
cluster_1	chr1_247118767_247119375	20.6655971103129	2.6944228246689	2.7143719515559	0.70981887866616	0.872388629565228	Distal Intergenic	LINC02897
cluster_1	chr1_24724507_24725894	28.648914848875	16.4535278811861	3.7928205497232	3.61971793529551	0.757392745529578	Distal Intergenic	CLIC4
cluster_1	chr1_247390042_247390606	26.6342117739177	6.42561717254808	9.59796230445698	8.72008037401905	0.746739118900093	Promoter (<=1kb)	LOC107985375
cluster_1	chr1_24742295_24742811	25.8545371797684	3.26952970917959	1.06442951793648	1.07524845978552	0.920710457281947	Promoter (2-3kb)	CLIC4
cluster_1	chr1_247447995_247448787	18.266739955191	6.40969077587801	9.33376512042623	4.15763580603446	0.69118915297031	3' UTR	NLRP3
cluster_1	chr1_24847763_24848879	23.3569108885917	14.6218658089055	7.63037414110511	10.5934927381998	0.811813913135495	Distal Intergenic	MIR6731
cluster_1	chr1_24909467_24909994	22.6358700807389	3.80294081005699	1.11473819990688	1.35853894972824	0.943108583317116	Intron (ENST00000308873.11/864, intron 3 of 4)	MIR6731
cluster_1	chr1_24926576_24927070	15.6743366970323	7.09934524766536	2.78741997841416	2.37650495121136	0.894032308054696	Promoter (1-2kb)	RUNX3
cluster_1	chr1_24929975_24930703	16.9362300396932	10.3240831616016	3.4718603288851	4.57652105225159	0.771656543543663	Promoter (<=1kb)	RUNX3
cluster_1	chr1_24970108_24970780	10.8775085387755	6.67072152474585	1.21623900854365	2.61356373327358	0.727811199097968	Exon (ENST00000568143.1/ENST00000568143.1, exon 1 of 1)	RUNX3
cluster_1	chr1_25239509_25240420	41.0367902667419	33.9140863387756	15.614626546016	31.5999074454612	0.50125531578623	Exon (ENST00000641059.1/ENST00000641059.1, exon 1 of 1)	RSRP1
cluster_1	chr1_25501171_25502115	10.6150938598181	3.13153764883474	0.792357887824516	2.9096483660958	0.854975773974381	Distal Intergenic	LDLRAP1
cluster_1	chr1_25506540_25507360	12.1647028870112	8.03020448882071	1.99710083052652	2.21193350269812	0.69799497239552	Distal Intergenic	LDLRAP1
cluster_1	chr1_25517466_25518370	14.3817657938494	1.61501604024632	1.25267306846551	1.44236427290304	0.870006697624766	Distal Intergenic	LDLRAP1
cluster_1	chr1_25586103_25586591	17.9569123063499	12.843914279342	2.99389088621024	2.91017065480535	0.648929145073124	Intron (ENST00000412797.1/26119, intron 1 of 1)	LDLRAP1
cluster_1	chr1_25587873_25588703	10.2997756778574	3.65927171037041	0.845379409705814	1.28086121800404	0.943262938523189	Intron (ENST00000412797.1/26119, intron 1 of 1)	LDLRAP1
cluster_1	chr1_25706902_25708020	10.64727032413	6.24044276905038	2.36993278961424	1.71648524262483	0.769477713584672	Promoter (1-2kb)	MAN1C1
cluster_1	chr1_25743393_25744597	7.75874651846458	3.71013873564981	1.88741611453276	4.14796692027093	0.720550157427238	Intron (ENST00000374332.9/57134, intron 2 of 11)	MAN1C1
cluster_1	chr1_25780178_25781094	12.2734260042292	3.67436961519287	1.80146415672339	2.12019181700514	0.969227407461642	Promoter (<=1kb)	MAN1C1
cluster_1	chr1_25858919_25859953	21.3667601557007	18.5671401130256	7.42093313768734	12.4435492052018	0.549911105966622	Promoter (<=1kb)	AUNIP
cluster_1	chr1_25892182_25892906	24.3115187706564	8.0541248477642	3.59135230568669	4.0598770447127	0.980953198757031	Promoter (<=1kb)	STMN1
cluster_1	chr1_26009772_26010552	8.27895778671713	1.91833623151914	1.28197252195259	3.72173002112628	0.690063638558116	Distal Intergenic	EXTL1
cluster_1	chr1_26094257_26095344	12.5198448721012	4.8427035902444	1.76181513118204	3.08553754843865	0.926107817972439	Distal Intergenic	PDIK1L
cluster_1	chr1_26145020_26145638	11.6369260718499	8.45349948172358	3.0790314522792	5.88542066623353	0.650103395454968	Distal Intergenic	FAM110D
cluster_1	chr1_26176961_26177894	23.8509340574122	7.16930323659006	1.44252958391994	1.18899360278241	0.960393264891152	Promoter (<=1kb)	CNKSR1
cluster_1	chr1_26190085_26191010	16.6937920975822	5.79177338920417	1.95189083835681	2.7076948376889	0.964360626797088	Promoter (<=1kb)	CATSPER4
cluster_1	chr1_26200673_26201698	20.3374950519138	3.64738141467667	2.50280550797917	2.6828041638713	0.899131491154023	3' UTR	ZPLD2P
cluster_1	chr1_26224980_26225966	23.8678463184084	16.1926215044429	6.31530291693927	8.61826924264536	0.729650399010547	Promoter (<=1kb)	ZPLD2P
cluster_1	chr1_26275472_26276462	13.8727549279268	9.17412410012242	3.86946798496455	4.06353132567277	0.74608015714533	Intron (ENST00000640292.2/64793, intron 11 of 12)	SH3BGRL3
cluster_1	chr1_26281907_26282646	23.9590379403442	18.0780901069763	6.52432803854353	7.47844857497233	0.652682428107617	Promoter (1-2kb)	SH3BGRL3
cluster_1	chr1_26290344_26291283	12.8082409042422	6.01384341159593	3.77466611823724	3.1115559850484	0.933424997271546	Intron (ENST00000314675.11/91544, intron 4 of 10)	UBXN11
cluster_1	chr1_26335958_26337157	37.9980476864018	18.8415216093352	4.42801092830918	7.85364432615673	0.838724859678261	Promoter (<=1kb)	CRYBG2
cluster_1	chr1_26359869_26360708	16.7639745058433	7.7148889756067	1.69644853007211	1.69564718633324	0.850864481156557	Promoter (<=1kb)	CRYBG2
cluster_1	chr1_26412528_26412811	33.9827235798352	18.0193599770351	2.64501667337033	2.27479049257875	0.771304897551689	Promoter (1-2kb)	LIN28A
cluster_1	chr1_26418417_26419494	39.3549486715455	15.1379380508331	3.42281535249542	2.69994651524993	0.905675904250154	Intron (ENST00000254231.4/79727, intron 2 of 4)	LIN28A
cluster_1	chr1_26530936_26531839	20.0180180143618	5.80618922295405	2.67360487621802	5.84053938038047	0.863718998227545	Promoter (<=1kb)	RPS6KA1
cluster_1	chr1_26541624_26542353	13.5210640360964	4.41503939083334	3.68365990911945	4.85418217318032	0.849020128221663	Promoter (<=1kb)	RPS6KA1
cluster_1	chr1_26677351_26678079	15.7209345337658	5.15438399123505	1.34362735766013	4.89210335908874	0.832770092851226	Distal Intergenic	ARID1A
cluster_1	chr1_26743972_26744524	21.611395571714	2.52738321410869	2.63384482374685	4.32165190782539	0.810763902659493	Intron (ENST00000430799.7/8289, intron 4 of 19)	ARID1A
cluster_1	chr1_26786820_26787231	15.261198691077	12.1723797264922	3.33198310447006	6.32530027630322	0.598263803874448	Promoter (<=1kb)	PIGV
cluster_1	chr1_26799439_26800528	6.6544757611047	2.22439083741366	1.27849955805793	1.86565035585239	0.920242649650278	3' UTR	PIGV
cluster_1	chr1_26862744_26863268	39.068864807118	4.8435440505816	1.78031897660883	2.97956826087411	0.903898780439797	Promoter (<=1kb)	SFN
cluster_1	chr1_26959684_26960954	23.4620605502771	8.4591853945104	2.16186057243245	3.85940111970609	0.94041443524353	Promoter (<=1kb)	KDF1
cluster_1	chr1_26997637_26998211	37.3933887554944	8.54345426263456	7.17840055715606	8.89402087107734	0.864409281139578	Intron (ENST00000522111.3/388610, intron 1 of 1)	TRNP1
cluster_1	chr1_26999387_26999903	54.4121467278214	6.9558230721841	2.81232017011914	2.44918249806132	0.916474842778229	3' UTR	TRNP1
cluster_1	chr1_27004119_27004583	17.5091743341434	5.74352107332384	3.66114732821371	1.71341199903092	0.919147288851595	Distal Intergenic	TENT5B
cluster_1	chr1_27004704_27005020	20.7121430668699	10.0526240879151	4.28859310395634	4.51007154911319	0.895993547963437	3' UTR	TENT5B
cluster_1	chr1_27007114_27007748	34.3970699103118	2.84120312365672	0.81928368483451	2.72319514171383	0.875674580797989	Intron (ENST00000289166.6/115572, intron 1 of 1)	TENT5B
cluster_1	chr1_27008149_27008567	33.6496483180857	7.3514131625983	1.76440646289468	3.32290080424699	0.958986571787426	Intron (ENST00000289166.6/115572, intron 1 of 1)	TENT5B
cluster_1	chr1_27010842_27011454	25.9038131459261	14.2619854291594	3.31258712821276	3.52106856625537	0.781083243529049	Promoter (1-2kb)	TENT5B
cluster_1	chr1_27012591_27013546	60.4347229012856	38.025413345886	17.6251458817227	14.1448634966432	0.761921098415526	Promoter (<=1kb)	TENT5B
cluster_1	chr1_27027017_27027531	21.5046685716776	5.41519977234233	2.78205043495965	2.13723060074734	0.958723115290785	Distal Intergenic	TENT5B
cluster_1	chr1_27031197_27032151	22.1634001976085	6.42473317084084	3.88346442749817	6.96346108894761	0.85402982991031	Distal Intergenic	TENT5B
cluster_1	chr1_27044524_27045212	19.7726891951051	7.92066749644066	4.62348934913134	6.22879506356923	0.93891254783053	Distal Intergenic	TENT5B
cluster_1	chr1_27049548_27050122	23.8089987331038	2.18630459268703	1.27096481109535	3.29381881063905	0.843191240312559	Distal Intergenic	TENT5B
cluster_1	chr1_27057442_27058614	15.2198912262437	6.26791783546857	2.55196183924259	8.14876506829141	0.673909022728387	Distal Intergenic	SLC9A1
cluster_1	chr1_27097359_27097724	18.301114655416	9.53223173819653	4.37259751436582	8.97400403776725	0.761734766339361	Distal Intergenic	SLC9A1
cluster_1	chr1_27145815_27146416	5.74284921574194	2.36588100712981	1.19834327021055	1.75912804844239	0.93065952410861	Intron (ENST00000263980.8/6548, intron 1 of 11)	SLC9A1
cluster_1	chr1_27306801_27308106	14.760637441547	11.2855346300055	4.89099802924429	8.59507871734774	0.624010348229642	Promoter (1-2kb)	WDTC1
cluster_1	chr1_27341626_27342207	15.6056784030326	11.110392759432	4.80167944493485	4.85410944409433	0.70240407551694	Promoter (<=1kb)	SYTL1
cluster_1	chr1_27349256_27350206	28.6221344086587	20.0044448659792	7.24608640686865	9.21355512082741	0.702639665392168	Promoter (<=1kb)	SYTL1
cluster_1	chr1_27350569_27351854	41.1456067086767	22.3597607975346	7.41366095801476	4.19578516571973	0.782135156004134	Promoter (<=1kb)	SYTL1
cluster_1	chr1_27357420_27357933	28.0130939152348	18.7633793819851	6.05803363193815	3.66567731473405	0.681742859812477	Promoter (<=1kb)	MAP3K6
cluster_1	chr1_27360097_27360947	15.9955393013463	11.6048792069653	3.56981798482325	1.93857531982188	0.634547723335194	Promoter (1-2kb)	MAP3K6
cluster_1	chr1_27382874_27383705	22.0203665487765	5.55611248964974	2.87089325537931	3.69061123912326	0.940858157906904	Promoter (<=1kb)	CD164L2
cluster_1	chr1_27391426_27393012	21.8707823428664	16.7103127600706	9.49186267015575	16.8697030859641	0.549040045636924	Promoter (<=1kb)	GPR3
cluster_1	chr1_27428376_27428984	9.82185921812494	8.26981134531331	2.13843887566963	3.6397277448394	0.569994127817098	5' UTR	GPR3
cluster_1	chr1_27496553_27497589	18.1140528895336	10.8865221426983	4.29389452351933	3.98638634202587	0.779575327294045	Distal Intergenic	WASF2
cluster_1	chr1_27525478_27525909	19.8100200061549	16.3507473419262	6.35633971949501	9.73703615594313	0.597158836426838	Promoter (<=1kb)	LOC105376892
cluster_1	chr1_27527014_27529324	27.1913537995187	18.3597167396255	11.1339392193531	10.4448302728448	0.795299482118134	Promoter (1-2kb)	LOC105376892
cluster_1	chr1_27575011_27576254	28.4922205556345	15.141253599171	7.66575371610205	7.23158556439656	0.878384086817723	Intron (ENST00000247087.10/27245, intron 1 of 5)	AHDC1
cluster_1	chr1_27600437_27600820	20.3301415103208	11.6729214966543	6.80638223605337	12.9816779463256	0.666135237366992	Promoter (2-3kb)	AHDC1
cluster_1	chr1_27614760_27616058	14.3442478930489	4.77509939049762	1.53966209510307	2.43200629028287	0.961380430100783	Exon (ENST00000374005.8/2268, exon 8 of 13)	FGR
cluster_1	chr1_27643593_27644433	14.4286010360453	4.69170475113867	2.40318681701338	1.96811303062213	0.972158231908188	Distal Intergenic	FGR
cluster_1	chr1_27656048_27656572	20.6923393472116	4.74212948545974	1.08641464674885	1.64645526790343	0.973287858981465	Distal Intergenic	LINC02574
cluster_1	chr1_27659527_27660391	20.6821297754476	13.9707852764459	4.73089544893628	5.95945198085586	0.715044238546053	Promoter (2-3kb)	LINC02574
cluster_1	chr1_27662730_27663503	18.7791921686376	12.5464268330449	4.64167954143183	10.3046722544561	0.656380714390943	Promoter (<=1kb)	LINC02574
cluster_1	chr1_27857970_27858608	12.1308526369187	7.82863197651526	3.46301546607812	4.57678466110972	0.776657819413581	Distal Intergenic	THEMIS2
cluster_1	chr1_27934682_27935413	34.8182176824463	4.43710000091735	2.56868584059065	3.30318139201141	0.889597443696794	Promoter (<=1kb)	SMPDL3B
cluster_1	chr1_27937130_27937773	13.116853230183	4.3123879703941	1.11111098034093	2.57594214835576	0.930764964959797	Promoter (2-3kb)	SMPDL3B
cluster_1	chr1_27959338_27960534	40.131874107648	16.620335762072	5.09555200299721	2.2365688643125	0.87505569119887	Promoter (<=1kb)	XKR8
cluster_1	chr1_28104797_28105678	25.3360269734655	8.33638316315173	3.21305255053906	4.72981368542171	0.964474877357107	Distal Intergenic	EYA3
cluster_1	chr1_28248470_28248862	14.5253035205598	10.7017717993389	4.15542901430152	5.89366224847357	0.677213061872852	Distal Intergenic	SESN2
cluster_1	chr1_28296623_28297353	16.5570550436573	5.33637079788222	2.36407025149816	2.33342962917843	0.981131330763186	Distal Intergenic	MED18
cluster_1	chr1_28369392_28370616	39.0162577840098	36.9500495080384	14.9867859636316	20.926827113705	0.508321694251852	Promoter (<=1kb)	PHACTR4
cluster_1	chr1_28510656_28511893	33.284089695391	3.52732940676099	1.6268227692566	1.99013997822856	0.895517971215936	Promoter (<=1kb)	RCC1
cluster_1	chr1_28591995_28592972	16.3327856332544	11.0706847592522	4.42762730545124	4.1329119078679	0.715974543657418	Promoter (<=1kb)	RAB42
cluster_1	chr1_28784841_28785829	10.9127581457724	8.87272384324402	2.97272454948252	6.10572055306809	0.570119408907345	Distal Intergenic	OPRD1
cluster_1	chr1_28811959_28812858	13.2534801561172	5.30384812978909	2.65790820473979	3.03186453393618	0.971232688982825	Promoter (<=1kb)	OPRD1
cluster_1	chr1_28882027_28882509	28.2630684709961	10.1238189314631	4.37472691178568	10.8448813180223	0.807454700378027	Distal Intergenic	EPB41
cluster_1	chr1_28886718_28888421	19.9351773949863	12.2912305615485	6.64204772585686	9.69230188908391	0.807703814303813	Promoter (<=1kb)	EPB41
cluster_1	chr1_29121216_29121786	29.0650045787678	8.13237910509447	5.80033888315643	3.59455945480204	0.929029156660464	Promoter (<=1kb)	TMEM200B
cluster_1	chr1_29124023_29125113	30.2443793092859	17.6912222294679	7.30754047057388	7.14382997191752	0.803692947039856	Promoter (<=1kb)	TMEM200B
cluster_1	chr1_29186194_29187208	14.8941774072899	2.76959194691835	2.2798430511331	2.90521498343807	0.863228448595323	Distal Intergenic	SRSF4
cluster_1	chr1_29249029_29249897	26.1688516661553	14.0656329058743	4.84629468157805	4.80157650448449	0.822182383848201	Intron (ENST00000345512.7/10076, intron 1 of 30)	PTPRU
cluster_1	chr1_29259346_29260894	14.6108330912565	8.77271375298718	5.28245722421395	5.03900234001882	0.863763804949134	Promoter (<=1kb)	PTPRU
cluster_1	chr1_29271634_29272626	14.0651540696036	7.27895695147656	1.91439985721522	1.62558930213632	0.808266196896401	Intron (ENST00000345512.7/10076, intron 7 of 30)	PTPRU
cluster_1	chr1_29282727_29283883	60.9201791968326	33.803162294726	8.55304151869757	4.07489631885489	0.756296291795353	Promoter (<=1kb)	PTPRU
cluster_1	chr1_29324607_29325506	60.3166957422662	15.1107825383721	2.11008655870736	1.41904753943042	0.97570687638917	Promoter (1-2kb)	PTPRU
cluster_1	chr1_29974002_29974853	11.7399848107884	5.67517634128564	2.71591284608384	6.60311880445767	0.685221173233223	Distal Intergenic	LINC01648
cluster_1	chr1_29990957_29991662	13.7775522305044	4.59285918451217	1.03947026060225	2.03261718399647	0.949222328045114	Distal Intergenic	LINC01648
cluster_1	chr1_30685055_30686249	37.6875338773367	12.2291464371193	4.90225704220691	5.93964443809625	0.978831754035617	Distal Intergenic	MATN1
cluster_1	chr1_30782317_30783296	14.9491134184213	6.95268691781722	5.01813309758257	6.78281537898844	0.873884294157997	Distal Intergenic	LAPTM5
cluster_1	chr1_30854062_30854524	12.8686621273523	11.4777995381174	4.19080910778483	7.46967070594077	0.527442635485777	Distal Intergenic	LOC400748
cluster_1	chr1_30929323_30930254	18.3978640938906	5.35136048719385	2.23478269988512	3.038018223842	0.96662201630655	Distal Intergenic	PUM1
cluster_1	chr1_31154567_31155819	33.0562210164164	25.59039404557	9.69290580240139	13.7490712999976	0.642997617974047	Distal Intergenic	NKAIN1
cluster_1	chr1_31170624_31171254	14.0002171864372	7.26677080144091	2.90691709697664	7.03860822569123	0.726623286224713	Distal Intergenic	NKAIN1
cluster_1	chr1_31181941_31182656	15.9471732988782	7.5714395722359	3.34622143835286	2.8594123289798	0.890598979132128	Exon (ENST00000373736.7/79570, exon 5 of 7)	NKAIN1
cluster_1	chr1_31214659_31215535	8.10588709072038	2.32896684711668	2.42308726965003	4.69291772730425	0.615104651495818	Intron (ENST00000373736.7/79570, intron 1 of 6)	NKAIN1
cluster_1	chr1_31372818_31374139	24.687019726671	20.9773356749544	9.82624223343844	12.4314550520275	0.598505951625373	Promoter (<=1kb)	FABP3
cluster_1	chr1_31394495_31395341	17.7326157252387	12.3226061551039	4.39001874114328	8.49211052707748	0.676101783003275	Distal Intergenic	SERINC2
cluster_1	chr1_31548548_31549908	17.2988719977983	10.4534177471128	5.2359982005297	8.4931503290141	0.782759390140663	Intron (ENST00000639839.1/149086, intron 4 of 4)	LOC105378626
cluster_1	chr1_31564011_31564749	10.0971744731326	4.66291423188604	2.74504958899502	4.73753020145346	0.811278297974679	Intron (ENST00000639839.1/149086, intron 4 of 4)	LOC105378626
cluster_1	chr1_31575958_31576819	18.9599948786289	6.53096445905791	1.44178776944735	2.2633937133489	0.948068532938745	Promoter (<=1kb)	TINAGL1
cluster_1	chr1_31703740_31705057	16.4731347270113	3.90449229236009	3.20989485045886	3.71451640490192	0.878816740124617	Promoter (<=1kb)	COL16A1
cluster_1	chr1_31705162_31705641	17.6499289506157	6.52086273656769	2.52869507462315	3.9335328793821	0.948027130988376	Promoter (<=1kb)	COL16A1
cluster_1	chr1_31714344_31715984	47.7391175426929	20.0991110933607	11.8775135818896	9.25013715795719	0.942667288269724	Distal Intergenic	COL16A1
cluster_1	chr1_31815636_31816367	20.5268601059022	4.46689837569153	1.17888834656086	2.05855334705145	0.957895129680412	Promoter (<=1kb)	SPOCD1
cluster_1	chr1_31944204_31945205	25.5115028810376	15.2207157817092	4.56392169067136	3.85441550387239	0.751301370521059	Promoter (<=1kb)	PTP4A2
cluster_1	chr1_31977460_31978239	9.97885683611189	3.19410803163599	1.13761223846015	2.41463957128463	0.91304993739489	Intron (ENST00000641788.1/ENST00000641788.1, intron 1 of 1)	PTP4A2
cluster_1	chr1_32107601_32108776	19.3246163920499	16.4106433714741	8.15954341923836	14.6183478364279	0.514040265487533	Promoter (<=1kb)	KPNA6
cluster_1	chr1_32239785_32241782	38.4029986996128	19.9018390165762	7.69447358808426	10.2808653067317	0.865473351179372	Promoter (<=1kb)	MTMR9LP
cluster_1	chr1_32248136_32248949	36.4813545671989	8.67431450591875	1.94415959369155	2.62643646984303	0.978783696535204	Promoter (<=1kb)	FAM167B
cluster_1	chr1_32273625_32274506	25.0593800804887	4.23964643489993	1.97840699091423	1.32377776281312	0.933092928068437	Promoter (<=1kb)	LCK
cluster_1	chr1_32361303_32362787	15.8274918205408	11.1246255921299	5.36088345503662	4.83215069987673	0.715523206993203	Promoter (<=1kb)	FAM229A
cluster_1	chr1_32400765_32401444	12.418556300153	7.22259125851337	3.94746254929321	6.89751576234813	0.745602604757901	Distal Intergenic	BSDC1
cluster_1	chr1_32437788_32438882	17.8278299964568	1.84809117251843	0.494749189904771	1.52643589398046	0.887521627368483	Distal Intergenic	ZBTB8A
cluster_1	chr1_32447581_32448792	17.5771092153952	9.11478026911265	4.87802839346887	4.55834127054392	0.897552275941568	Distal Intergenic	ZBTB8A
cluster_1	chr1_32520415_32521054	12.519423126667	8.37875354419043	1.80177624426415	3.78774783080975	0.68850383732684	Intron (ENST00000480336.1/653121, intron 4 of 9)	ZBTB8A
cluster_1	chr1_32611884_32612833	24.9016339271668	13.7364808127321	3.71452240637969	5.26910072904381	0.8010192401091	Intron (ENST00000341885.6/339487, intron 1 of 1)	ZBTB8OS
cluster_1	chr1_32712138_32712619	19.5058480422314	9.72081283175323	2.59010467152615	5.87937260339556	0.824952725626994	Distal Intergenic	SYNC
cluster_1	chr1_32716346_32717417	26.0119188717367	14.8461246284522	3.76796158848713	6.58501107308253	0.781293507377771	Distal Intergenic	SYNC
cluster_1	chr1_32724547_32725603	10.3512300550425	5.26954587194308	1.64729919371846	2.0585015120226	0.846772234984502	Exon (ENST00000421619.1/ENST00000421619.1, exon 1 of 2)	KIAA1522
cluster_1	chr1_32736399_32737680	16.2063491888998	5.44503227130438	1.28056090693745	2.62051919647032	0.94485873048307	Distal Intergenic	KIAA1522
cluster_1	chr1_32760009_32760625	39.8774530603949	14.0037957955866	2.3586061839413	3.29026766185445	0.931651254046656	Intron (ENST00000401073.7/57648, intron 1 of 6)	KIAA1522
cluster_1	chr1_32760787_32761288	27.9716798895907	2.60863740767622	1.73333660457761	2.68509259367736	0.865314258098199	Intron (ENST00000401073.7/57648, intron 1 of 6)	KIAA1522
cluster_1	chr1_32765266_32766266	16.1657756237937	7.69647836506988	3.92543085337747	7.10060508595917	0.824142235321557	Promoter (<=1kb)	KIAA1522
cluster_1	chr1_32766286_32767064	16.9806851849747	9.94872257578341	3.57885162670968	3.58940238495373	0.786902581792149	Promoter (<=1kb)	KIAA1522
cluster_1	chr1_32772868_32773483	19.1765363374436	8.69385193320781	2.37326140617055	5.4784197670809	0.855672922461897	3' UTR	KIAA1522
cluster_1	chr1_32924682_32926261	13.7731702763479	9.51159720653053	2.42798601733601	2.96305893267368	0.678710204055656	Exon (ENST00000661031.1/ENST00000661031.1, exon 1 of 3)	TMEM54
cluster_1	chr1_32980510_32981610	8.33537598176311	2.44715007236756	0.517522327873545	1.10924052948005	0.959818496272038	Distal Intergenic	RNF19B
cluster_1	chr1_32992250_32992835	14.4296284755217	5.29603377207847	1.19398316971275	1.47059671491863	0.931236484391999	Intron (ENST00000427524.1/ENST00000427524.1, intron 1 of 1)	RNF19B
cluster_1	chr1_33055103_33056039	6.55788726417611	2.62257658904217	2.07059261251388	2.97591829467245	0.818629683933629	Intron (ENST00000548559.1/204, intron 2 of 4)	AK2
cluster_1	chr1_33152721_33153521	26.1550486872125	6.20286744492751	4.36053380638479	3.76869346174661	0.923754041428155	Intron (ENST00000291416.10/55223, intron 4 of 4)	TRIM62
cluster_1	chr1_33633080_33633842	10.9145107873908	3.17990391111313	2.77100693775757	5.41971931576189	0.689323732930426	Exon (ENST00000373381.9/114784, exon 32 of 71)	CSMD2
cluster_1	chr1_34149170_34150037	9.65835731077414	2.08475338011007	1.4519928824471	2.28001437815256	0.862626999130772	Intron (ENST00000373381.9/114784, intron 1 of 70)	CSMD2
cluster_1	chr1_34162929_34163702	23.697574750145	13.8656972887725	8.47724197398537	11.8143664606193	0.845592074377023	Promoter (1-2kb)	CSMD2
cluster_1	chr1_34166188_34166602	20.4253537543839	8.77305415627475	3.89683594209894	5.14311940203699	0.941794405179042	Promoter (<=1kb)	C1orf94
cluster_1	chr1_34166706_34167398	19.0674899700248	8.44527614849472	5.32457962135649	5.01298405103231	0.970305167127375	Promoter (<=1kb)	C1orf94
cluster_1	chr1_34188141_34189054	10.5164541121928	1.98376368281669	0.55256617615262	1.33091003774859	0.923049634803751	Intron (ENST00000373374.7/84970, intron 1 of 6)	C1orf94
cluster_1	chr1_3454153_3455565	26.8899023763673	15.4802111675886	6.0078972267188	6.00582917221149	0.804774259355617	Promoter (<=1kb)	ARHGEF16
cluster_1	chr1_34865585_34866805	13.369099705076	10.2920194494596	4.73079192434793	6.17816297511591	0.66838796958873	3' UTR	SMIM12
cluster_1	chr1_34884896_34886359	18.492442903302	8.08881474651237	4.21017488832912	5.37241415909861	0.950974442266328	Exon (ENST00000235180.4/58512, exon 4 of 10)	DLGAP3
cluster_1	chr1_3491165_3492072	16.8733293178565	12.7829986045397	4.45828055188747	9.59664728271432	0.599594534337892	Promoter (1-2kb)	MEGF6
cluster_1	chr1_34918626_34919579	13.9720319996527	1.70433009576191	3.83382016662836	6.11881071665271	0.626998807410377	Intron (ENST00000373347.6/58512, intron 1 of 11)	DLGAP3
cluster_1	chr1_3501937_3502513	15.7317381835237	7.78634062559092	4.66659923413471	3.39709188415187	0.888686993200747	Intron (ENST00000356575.9/1953, intron 17 of 36)	MEGF6
cluster_1	chr1_35210133_35211198	12.9557780716934	6.05257061260963	2.85311206415853	4.48786408219268	0.894177462447081	Distal Intergenic	SFPQ
cluster_1	chr1_3530452_3532018	19.8658739837109	18.7368228005775	8.06129716639844	12.3865053548396	0.500413551623164	Promoter (<=1kb)	MEGF6
cluster_1	chr1_35390204_35391503	16.2030737629612	1.607037988972	0.39666322228225	0.828557080322009	0.901786608980184	Promoter (1-2kb)	ZMYM4
cluster_1	chr1_35554898_35555457	30.5864813934347	0.801264346866676	2.25705959020295	6.0560239428586	0.755818589053854	Promoter (<=1kb)	KIAA0319L
cluster_1	chr1_35577447_35577988	18.7222127700712	6.67020871531805	2.3801539717127	3.52729326693537	0.95831970530472	Promoter (<=1kb)	TFAP2E-AS1
cluster_1	chr1_35717902_35719349	17.3477044335454	9.34741279006614	3.37033726194893	9.99187381042741	0.649349730029559	Promoter (<=1kb)	C1orf216
cluster_1	chr1_35930209_35931869	33.309231467644	17.4673130416532	10.9876213492595	15.280731538272	0.878426587484475	Promoter (<=1kb)	AGO3
cluster_1	chr1_36096993_36097645	14.3425176784624	4.643703671515	2.87906292723114	2.79082374293675	0.965475252650021	Promoter (2-3kb)	COL8A2
cluster_1	chr1_36099535_36100288	15.2325388658656	7.18517741815477	1.93604443503389	6.91407311512527	0.724910613177352	Promoter (<=1kb)	COL8A2
cluster_1	chr1_36160792_36161680	17.3044934895787	10.6204635233317	4.88050496179816	6.3461171464943	0.811114194283958	Intron (ENST00000429533.6/55700, intron 1 of 5)	MAP7D1
cluster_1	chr1_36176164_36176768	21.1561172255189	3.25841834378119	1.78188464264826	3.60174052737624	0.866333240770121	Promoter (<=1kb)	MAP7D1
cluster_1	chr1_36178586_36179405	27.9490384866515	4.78323718699123	1.98939637996782	1.77240539217153	0.936342307008484	Promoter (<=1kb)	MAP7D1
cluster_1	chr1_36187665_36188642	22.8059446673581	8.97362946563681	2.22855552066843	6.79358593429488	0.850927285730733	Distal Intergenic	MAP7D1
cluster_1	chr1_36299697_36300354	13.2171012830965	3.6849386229704	1.20048579726014	4.97096212262627	0.761098833422548	Intron (ENST00000469141.6/9967, intron 10 of 12)	SH3D21
cluster_1	chr1_36320867_36322002	33.2112745692504	14.3381452006269	5.28187139986459	4.33627160219532	0.901451732634226	Promoter (<=1kb)	SH3D21
cluster_1	chr1_36322778_36324447	21.9694690185731	18.0471404618426	9.45332587928747	7.79494454133906	0.611513438060399	Promoter (<=1kb)	EVA1B
cluster_1	chr1_3650955_3651829	10.8871495121535	4.20247728494184	2.27056145609324	4.11370557832363	0.852863662417915	Promoter (<=1kb)	TP73
cluster_1	chr1_3652621_3653175	15.6642576842468	7.67396635567051	3.69497352574373	3.156974146291	0.890100423239732	Promoter (<=1kb)	WRAP73
cluster_1	chr1_3674192_3675449	13.5978053423259	3.89934875789454	2.37106285078534	3.70896887596379	0.890053995029293	Intron (ENST00000378295.9/7161, intron 1 of 13)	TP73-AS3
cluster_1	chr1_36771120_36772231	12.6238697366795	9.45805231293044	3.22731936873025	3.47970963615012	0.649715349460768	Intron (ENST00000664693.1/ENST00000664693.1, intron 1 of 2)	GRIK3
cluster_1	chr1_36823982_36824880	8.80728150558661	7.34338614948579	2.58649013438476	3.50688656379269	0.590678977318465	Intron (ENST00000373091.8/2899, intron 11 of 15)	GRIK3
cluster_1	chr1_3695495_3696157	15.283478296964	6.17197636609291	4.29457903471088	5.19881317688976	0.936596124684531	Promoter (1-2kb)	TP73
cluster_1	chr1_37036033_37036742	18.6116304745976	8.04400293264958	1.55283320333965	3.71020677076284	0.873973832420388	Promoter (1-2kb)	GRIK3
cluster_1	chr1_3707273_3708191	12.7500749703074	7.07551836412226	2.80021972381189	2.74632529889937	0.823546696193992	5' UTR	TP73
cluster_1	chr1_3717699_3718473	16.0186456105218	15.2208150959876	5.3853312256736	6.79346049628025	0.507911038052367	Intron (ENST00000378295.9/7161, intron 4 of 13)	TP73
cluster_1	chr1_3732516_3733544	14.5340338754369	2.56337592115065	2.46948514827064	1.39309870312103	0.877691714620805	3' UTR	TP73
cluster_1	chr1_37394855_37395712	19.6545591127009	6.59875954917254	2.97184605304585	9.75999220805593	0.687705631880775	Intron (ENST00000668045.1/107984942, intron 1 of 1)	LOC107984942
cluster_1	chr1_3746389_3747684	20.2416877029456	14.50140600421	7.66077285659073	12.3914999512505	0.67518315250214	Promoter (<=1kb)	CCDC27
cluster_1	chr1_37735023_37735734	12.4213767474448	1.91858917271989	2.20940274822518	1.58951608976025	0.850210628084804	5' UTR	EPHA10
cluster_1	chr1_3775488_3775807	16.820117108113	10.699352178948	5.73551501179193	3.22135138388017	0.727168197761934	Promoter (2-3kb)	SMIM1
cluster_1	chr1_3793212_3794235	22.7609638995569	2.49719451987201	1.2783627917988	2.53241738556826	0.872215227875443	Promoter (2-3kb)	LRRC47
cluster_1	chr1_37995617_37996756	22.2969470456475	7.92940981872617	2.38844605948892	2.93810622653192	0.955258862816398	Promoter (2-3kb)	FHL3
cluster_1	chr1_38076004_38076488	17.0960486241432	8.07866754847494	2.81518059477641	5.30109949165136	0.864795640805241	Intron (ENST00000432922.5/105378653, intron 1 of 3)	MIR3659
cluster_1	chr1_38139650_38140651	11.4933742158544	6.09510615461852	3.58762823205194	6.66979207639705	0.717026752233883	Promoter (<=1kb)	LINC02786
cluster_1	chr1_38270299_38271074	34.8619409681098	5.22242098160389	1.12150803055453	3.26162530983717	0.916986536142798	Distal Intergenic	LINC01343
cluster_1	chr1_38291832_38292640	16.5000751713596	1.6781242580783	1.43761276126992	1.24936824882176	0.87047928870676	Distal Intergenic	LINC01343
cluster_1	chr1_38489685_38490421	26.2493022093606	3.90637635662346	1.77685950497521	1.46367840517752	0.922763739655491	Intron (ENST00000665359.1/105378656, intron 1 of 1)	LINC01685
cluster_1	chr1_38558009_38559603	13.0860148834656	9.3710651825736	4.5529418739892	6.79828541839418	0.70817414134407	Distal Intergenic	LINC01685
cluster_1	chr1_38941366_38942146	11.3246436877034	2.6286915824711	1.11618589374355	0.940171273199333	0.96301042413726	Promoter (<=1kb)	RHBDL2
cluster_1	chr1_38953101_38953953	16.4268612771749	3.33690623989702	1.26092413309647	1.5423113832488	0.948855767033547	Intron (ENST00000667635.1/ENST00000667635.1, intron 1 of 1)	RHBDL2
cluster_1	chr1_39001360_39002012	19.2887764113678	2.09966755111395	0.799294726072781	2.09616870546022	0.876008442597604	Intron (ENST00000432648.8/79647, intron 3 of 4)	AKIRIN1
cluster_1	chr1_39016588_39017327	17.6286091312247	2.38221151053412	1.54650108770195	1.31743477482249	0.897555107204723	Distal Intergenic	NDUFS5
cluster_1	chr1_39131998_39133563	19.1255954322294	14.7029615309521	5.1749326309906	5.7505057770781	0.637980925733137	Intron (ENST00000361689.7/23499, intron 2 of 93)	MACF1
cluster_1	chr1_39141854_39143123	20.0171363469835	7.68931546579032	0.841693299131135	1.91696269869232	0.898025481736776	Intron (ENST00000361689.7/23499, intron 2 of 93)	MACF1
cluster_1	chr1_39158379_39159662	12.2292664926492	8.37813284629011	3.4064781511092	4.63696480190036	0.728837380724849	Promoter (<=1kb)	MACF1
cluster_1	chr1_39170674_39171602	11.2023263111857	8.78683519628812	2.29664567797413	4.70008113831955	0.603063270051671	Intron (ENST00000361689.7/23499, intron 2 of 93)	MACF1
cluster_1	chr1_39191560_39192942	12.3448569228207	8.49118893152835	4.04834277830442	6.51492117439998	0.714597470055142	Intron (ENST00000361689.7/23499, intron 2 of 93)	MACF1
cluster_1	chr1_39204327_39205536	9.71066814529883	9.0912403001057	2.22438100102547	3.07363737323833	0.511557446893041	Promoter (<=1kb)	MACF1
cluster_1	chr1_39230131_39231017	14.255753512924	3.56848508045435	0.594266276705798	0.957273067883202	0.98022289555564	Intron (ENST00000361689.7/23499, intron 2 of 93)	MACF1
cluster_1	chr1_39258324_39259072	13.8170219327436	4.06678801163341	2.63813091399058	4.86302453828831	0.823434346159068	Exon (ENST00000688212.1/23499, exon 5 of 5)	MACF1
cluster_1	chr1_39268125_39269395	11.4344451032769	7.51613738366853	3.31827429136536	7.48660351597485	0.608128338576684	Promoter (<=1kb)	MACF1
cluster_1	chr1_39490535_39492262	24.6334125692593	12.6405837862323	6.09636827802561	6.52749721257101	0.896589975076061	Promoter (<=1kb)	BMP8A
cluster_1	chr1_39609443_39610451	18.7595885708394	4.3450072508751	2.45586290267859	1.82085830118786	0.945028586216475	Distal Intergenic	HEYL
cluster_1	chr1_39639224_39640249	27.2274890810438	6.98958413456998	3.44515322874292	2.66569727065979	0.962841488665195	Promoter (<=1kb)	HEYL
cluster_1	chr1_39646191_39647095	8.73689689799042	5.24992963345221	2.31480521983015	3.09936866518262	0.8149239453972	Distal Intergenic	HEYL
cluster_1	chr1_39700879_39702300	19.7022620570678	6.52360917655903	4.29098131793413	13.6125495051602	0.539201115731988	Intron (ENST00000470018.5/10450, intron 1 of 7)	PPIE
cluster_1	chr1_39788363_39789740	11.4975779076546	6.2044830951647	3.96222570018493	7.07056359734907	0.697366407383195	Promoter (<=1kb)	LOC101929536
cluster_1	chr1_39799150_39800202	10.4948616638216	3.66001021377959	2.2966613598832	3.07752573058798	0.925214436860961	Promoter (<=1kb)	NA
cluster_1	chr1_39922108_39922847	28.3169762725484	11.0325211489039	1.991673596299	2.57286161422165	0.904385808803913	Distal Intergenic	MYCL
cluster_1	chr1_40143739_40144539	11.1700617822354	5.66161471579404	2.3398433608465	4.31594658569695	0.834466096405643	Distal Intergenic	RLF
cluster_1	chr1_40773523_40774493	20.77588220623	3.03830489771094	0.746641734366703	1.68611652955283	0.920793276370531	Distal Intergenic	NFYC
cluster_1	chr1_40782344_40783005	13.8493199737617	9.73288742621037	3.99590323448951	5.8883115799661	0.710503030865703	Promoter (<=1kb)	KCNQ4
cluster_1	chr1_40802156_40802879	29.1179612456948	20.515232045556	8.94421179709781	3.80909705844796	0.646514664384086	Intron (ENST00000347132.10/9132, intron 1 of 13)	KCNQ4
cluster_1	chr1_40818034_40819128	25.5381439892685	18.3781257776631	5.79196804834821	5.98737858958185	0.66507191692352	Promoter (<=1kb)	KCNQ4
cluster_1	chr1_40837785_40838710	13.0053682982038	2.97118789860762	3.07228883188206	1.80291398476582	0.86650780777249	3' UTR	KCNQ4
cluster_1	chr1_40861358_40862925	40.2247098927149	31.1695217475033	15.9074852986042	21.1803550011944	0.675095915737173	Promoter (<=1kb)	CITED4
cluster_1	chr1_40877477_40878235	6.02575777574119	1.22752924136673	2.06730623192071	2.16130638346059	0.708600811426578	Distal Intergenic	CITED4
cluster_1	chr1_40884092_40884804	11.1286308112403	7.95853542278228	2.36310618119493	1.81613353074091	0.652885590123074	Distal Intergenic	CITED4
cluster_1	chr1_40948522_40949335	11.8180620405206	3.87763354325021	1.40342062660341	1.93394336205273	0.971548394460505	Distal Intergenic	CTPS1
cluster_1	chr1_40952394_40952948	12.3035379424343	4.3129618723802	2.66781751350973	3.84877631450398	0.907495620798026	Distal Intergenic	CTPS1
cluster_1	chr1_41021480_41022303	16.2729879555253	2.89989075572199	2.53713138177254	2.14690774573814	0.882361513573824	Promoter (<=1kb)	SLFNL1
cluster_1	chr1_41330148_41331880	6.81299260307029	3.61716659545964	2.25952666491287	2.71082935008471	0.932982165807824	Intron (ENST00000657314.1/ENST00000657314.1, intron 1 of 1)	FOXO6
cluster_1	chr1_41371732_41372717	21.6308405539739	16.2326014386397	5.77661009575392	6.89299905910382	0.656068452609927	Promoter (2-3kb)	FOXO6-AS1
cluster_1	chr1_41435544_41436187	9.28281811077526	8.87387974969184	2.37675407152383	2.76773222133458	0.500912077671883	Distal Intergenic	EDN2
cluster_1	chr1_41495434_41497042	17.0340126304167	15.6258781412417	6.45060817600806	4.23337390896429	0.516687648256492	Distal Intergenic	EDN2
cluster_1	chr1_41823187_41824130	16.2507532965244	14.6213699889108	3.1903800156085	3.29352015140709	0.52884819637769	Intron (ENST00000372584.5/59269, intron 1 of 7)	HIVEP3
cluster_1	chr1_42146662_42147287	12.9775806551054	5.64582210927673	0.962997497704937	3.9938025617166	0.811599460488125	Distal Intergenic	GUCA2B
cluster_1	chr1_42739888_42741565	18.9985294062268	7.09948908606478	2.36053454058345	4.30061938353767	0.930099116418912	Promoter (<=1kb)	CLDN19
cluster_1	chr1_42922972_42923438	26.5002650728063	8.14974931087411	5.62526505729806	7.50674393716259	0.900202948401065	Distal Intergenic	SLC2A1
cluster_1	chr1_42962682_42963050	30.4032675730677	9.42397301851202	5.85711886013305	9.6568903750201	0.868421223753518	Intron (ENST00000431759.6/440584, intron 1 of 3)	SLC2A1-DT
cluster_1	chr1_42967042_42967577	8.65899361540084	3.32790916336269	1.41219418613067	4.93336021470849	0.636901709568177	Intron (ENST00000431759.6/440584, intron 1 of 3)	SLC2A1-DT
cluster_1	chr1_42978380_42979350	10.2873616500928	4.32021706920295	1.56374834212777	2.98707066840187	0.893596477437527	Intron (ENST00000431759.6/440584, intron 3 of 3)	SLC2A1-DT
cluster_1	chr1_43007357_43007820	27.5280474877539	15.4516727412036	6.63267548496889	2.82925473939462	0.761601838170144	Distal Intergenic	SLC2A1-DT
cluster_1	chr1_43067962_43068853	10.2095518800904	1.8989629071087	1.22208837155934	1.45191120563171	0.901567470941573	Distal Intergenic	FAM183A
cluster_1	chr1_43147433_43148273	43.2878260260492	21.988031211869	12.2758787369605	21.6109664499134	0.789836036566377	Promoter (<=1kb)	FAM183A
cluster_1	chr1_43206648_43207604	16.7426948754916	3.37395444975291	1.6091957661651	2.47147640371069	0.917090485239589	3' UTR	CFAP57
cluster_1	chr1_43270288_43271449	33.2266495237528	7.77430464823653	1.56851903196089	2.2660928480168	0.97855648540573	Promoter (<=1kb)	EBNA1BP2
cluster_1	chr1_43285171_43286121	18.8208881676438	6.54096709495726	2.18313789046292	0.90370958313965	0.923369144947368	Promoter (<=1kb)	C1orf210
cluster_1	chr1_43348456_43350438	41.9621228361956	23.8440195589272	11.0227843181113	7.48275198173143	0.795863710146019	Promoter (<=1kb)	MPL
cluster_1	chr1_43358065_43359419	35.867301654532	26.8051541505487	13.9180886925073	23.7073975213082	0.622919748004335	Promoter (<=1kb)	CDC20-DT
cluster_1	chr1_43454379_43454965	26.7254439987524	3.32146453035235	2.20980041744041	5.68737658613641	0.814261610384521	Promoter (<=1kb)	HYI
cluster_1	chr1_43545667_43546467	31.3676474727367	24.2216571991814	8.91778966909637	8.42059626966468	0.631676949802485	Promoter (<=1kb)	PTPRF
cluster_1	chr1_43549881_43550601	42.0603218010764	21.323366550637	6.37071106096114	5.429692489159	0.826188125426765	Intron (ENST00000496043.5/5792, intron 4 of 4)	PTPRF
cluster_1	chr1_43653215_43653712	24.5074609938222	2.85289665955715	2.51605948247471	2.77445801196876	0.861848987198838	Promoter (<=1kb)	KDM4A
cluster_1	chr1_43659545_43660874	17.0747336236348	1.2237181361957	1.242544827277	2.20325922649342	0.828386488889265	3' UTR	KDM4A
cluster_1	chr1_43763380_43763960	13.2482888238776	5.8554764486326	3.65333134741512	10.2804770765534	0.505343706335353	Intron (ENST00000645057.1/9682, intron 16 of 25)	ST3GAL3
cluster_1	chr1_43765921_43766810	17.4537167026935	10.075436555068	1.75937687408588	2.70554214063065	0.752459636108101	Intron (ENST00000645057.1/9682, intron 16 of 25)	ST3GAL3
cluster_1	chr1_43858167_43858899	13.5626529723399	3.56417790656156	1.55442312921909	3.03593764678457	0.905097361551161	3' UTR	MIR6079
cluster_1	chr1_43885127_43885934	20.7890476551854	9.12395465331287	0.967128589006946	2.9252881926349	0.853576042363687	Intron (ENST00000645057.1/9682, intron 19 of 25)	ST3GAL3
cluster_1	chr1_43912488_43913629	6.91150427816564	1.96604623344527	0.706425914317273	2.42289721034393	0.791687568359756	3' UTR	ST3GAL3
cluster_1	chr1_43933213_43934041	24.9407967897781	9.54384839060919	4.61652217337337	2.68684317535052	0.923164796390181	Promoter (<=1kb)	ARTN
cluster_1	chr1_43934129_43934530	24.9597487597791	4.89768425539269	2.84238442951004	3.98568979602717	0.902633437290798	Promoter (<=1kb)	ARTN
cluster_1	chr1_43934648_43935093	31.7506473463769	11.8156196819562	8.32194260726836	11.1920249283729	0.895487557780354	Promoter (<=1kb)	ARTN
cluster_1	chr1_43935673_43936995	18.113973523975	8.35757521304006	6.37645803940197	6.82752341806751	0.960630168018326	Promoter (<=1kb)	ARTN
cluster_1	chr1_43991267_43992543	33.033197082358	18.5011329652711	11.0690802368959	12.6465908451093	0.913070561837856	Promoter (<=1kb)	CCDC24
cluster_1	chr1_44005620_44006252	13.2599047290142	6.65913951751669	2.86756007578573	6.17207198813317	0.772024997290961	Intron (ENST00000372307.7/6536, intron 4 of 11)	CCDC24
cluster_1	chr1_44213115_44213946	21.0333637114045	16.9991791903886	6.83672897046049	15.3846752304383	0.512405073549193	Promoter (<=1kb)	DMAP1
cluster_1	chr1_44238036_44238759	29.2779158204208	9.26300981219966	6.66888034875034	4.15102292844905	0.928816202155402	Intron (ENST00000456170.6/79033, intron 6 of 6)	ERI3-IT1
cluster_1	chr1_44378075_44378916	11.4506444781669	4.64019048839015	1.91968282190361	1.17655591418383	0.907848375710181	Distal Intergenic	ERI3
cluster_1	chr1_44405937_44406427	18.5620167738456	13.8539971382189	6.26126200207903	5.43193853274769	0.665641482275726	Promoter (<=1kb)	RNF220
cluster_1	chr1_44407465_44408099	14.104170146544	10.1773797341895	4.17411735011252	4.07893101897523	0.685050792095721	Promoter (<=1kb)	RNF220
cluster_1	chr1_44483950_44484674	12.97041119115	3.70606878472339	0.682641805847832	2.69080145864641	0.90011874451886	Intron (ENST00000355387.6/55182, intron 2 of 14)	MIR5584
cluster_1	chr1_44523679_44525104	18.5065106373657	8.34680683144493	5.17980837290228	4.57528039029615	0.95462519988763	Intron (ENST00000355387.6/55182, intron 2 of 14)	MIR5584
cluster_1	chr1_44542561_44544085	36.0519883725344	24.0889100006295	10.2691875890044	4.23851024320838	0.67306243856375	Promoter (1-2kb)	MIR5584
cluster_1	chr1_44592112_44593003	11.1619126541744	1.01954857970895	1.15092739685648	3.0814461954245	0.74473648240709	Intron (ENST00000355387.6/55182, intron 2 of 14)	RNF220
cluster_1	chr1_44594927_44595600	13.1548997794999	5.76928772840816	3.96553832187858	3.7938743350206	0.97798538468697	Intron (ENST00000355387.6/55182, intron 2 of 14)	RNF220
cluster_1	chr1_44609436_44610710	10.8975950766669	4.11527433455978	2.74632311623962	4.87601775503598	0.791523416256133	Intron (ENST00000355387.6/55182, intron 2 of 14)	RNF220
cluster_1	chr1_44652654_44653254	15.2505644777986	7.08584361297495	4.92122780914895	7.55479912882678	0.812628966640753	3' UTR	RNF220
cluster_1	chr1_44720809_44722347	24.3333563698643	7.09463128955266	2.44494550670486	5.18630981838317	0.923041422936949	Promoter (<=1kb)	RNU5F-1
cluster_1	chr1_44730380_44731625	31.7372556290122	18.7973088545348	10.6671905821167	18.0466555747227	0.744265317684931	Promoter (<=1kb)	RNU5D-1
cluster_1	chr1_44784042_44784965	18.2943842214722	9.58029604285285	6.76349701062104	4.60461035480479	0.864164704709217	3' UTR	BEST4
cluster_1	chr1_44786072_44786917	21.0028790226653	15.3438409120211	8.44386768160991	6.80592080331315	0.695342952301763	Promoter (1-2kb)	BEST4
cluster_1	chr1_44793228_44794057	18.6218242448368	5.40631472971363	2.51175298230715	3.16746799412417	0.965254368686932	Distal Intergenic	BEST4
cluster_1	chr1_44812949_44814119	12.3653540896834	4.91720966141022	3.04924667787078	4.73385841246821	0.873458944590324	Promoter (<=1kb)	BTBD19
cluster_1	chr1_44819154_44820532	34.4649829098515	25.0891271501006	6.85635608305163	6.10211839522722	0.644472034556493	Promoter (2-3kb)	PTCH2
cluster_1	chr1_45326485_45327522	15.5582986348171	7.14528858799013	3.16529788167989	3.47074145710033	0.923142410163679	Promoter (<=1kb)	HPDL
cluster_1	chr1_45360466_45361426	8.17160285832739	4.34527710232253	1.64717126110557	1.47829469907328	0.830877298396491	Intron (ENST00000671898.1/4595, intron 4 of 20)	TOE1
cluster_1	chr1_45573191_45573679	17.9928120268133	8.34662163481559	1.51492827858613	2.57906500581273	0.850172268906638	Distal Intergenic	AKR1A1
cluster_1	chr1_45881360_45882062	6.94321623286697	4.87877857666798	1.37935611121494	3.96315332154364	0.598073622280302	Intron (ENST00000470809.1/23139, intron 3 of 4)	MAST2
cluster_1	chr1_45926967_45927957	13.3110061562607	2.48028607256928	1.31463979548037	2.01583812387627	0.902202389078196	Intron (ENST00000361297.7/23139, intron 4 of 28)	MAST2
cluster_1	chr1_45929174_45929704	16.268040231018	4.1842116042881	1.44481007221745	1.66479300238189	0.976555819460639	Intron (ENST00000361297.7/23139, intron 4 of 28)	MAST2
cluster_1	chr1_45953975_45954822	9.17376080397963	2.35906920973719	1.34986209609437	2.61294970009066	0.853772019719165	Intron (ENST00000361297.7/23139, intron 4 of 28)	MAST2
cluster_1	chr1_46166579_46167637	10.604035018733	1.73663383442437	1.97421418347109	1.15293749397807	0.855363133456065	Intron (ENST00000540385.2/110117499, intron 1 of 9)	TSPAN1
cluster_1	chr1_46347855_46348523	17.3910981158393	3.59449718980697	3.22734999547401	3.76268311633516	0.859069002682044	Intron (ENST00000307089.7/387338, intron 2 of 4)	NSUN4
cluster_1	chr1_46401976_46402615	15.2154600215109	3.37089792150015	3.24440987495083	5.46656399892631	0.763486130878317	Exon (ENST00000243167.9/2166, exon 2 of 15)	FAAH
cluster_1	chr1_46406033_46407125	13.2684142592839	5.004432786672	4.90473228421374	8.10968154208972	0.635478505879865	Promoter (<=1kb)	FAAH
cluster_1	chr1_46442224_46443251	25.3079598745823	12.6880796464001	5.17728868517348	4.55282211753149	0.862806894366901	Promoter (<=1kb)	FAAHP1
cluster_1	chr1_46489221_46490125	16.0926822322584	9.44156913409989	3.66698482568312	5.97306146454339	0.798400356464415	Promoter (<=1kb)	DMBX1
cluster_1	chr1_46516865_46517591	23.2706537220588	9.8991800028255	2.66553185809929	3.16310455220866	0.898446312896792	Distal Intergenic	DMBX1
cluster_1	chr1_46526301_46527345	10.9764869683268	6.01818528364016	3.85939765228417	2.66628181708042	0.844605244326492	Distal Intergenic	TMEM275
cluster_1	chr1_46603518_46604623	44.181756650013	25.1662438121237	17.3424306404907	19.6761051385159	0.940457483506929	Promoter (<=1kb)	MKNK1
cluster_1	chr1_46613461_46614241	21.8049787286045	8.29415557322041	2.20073232978814	1.95323906423747	0.920642582145661	Promoter (<=1kb)	MOB3C
cluster_1	chr1_46616322_46617169	17.5723378970645	12.13266072651	7.55719299542717	4.61860201595822	0.696887000053028	Promoter (<=1kb)	MOB3C
cluster_1	chr1_46747615_46748317	9.33631971066567	3.0306187485449	2.56522392095155	1.8719128398657	0.912647355504937	Distal Intergenic	LOC105378699
cluster_1	chr1_47192765_47193468	20.9280910841247	10.0397874759806	4.05000509578629	4.09300241939967	0.889622141128591	Promoter (1-2kb)	PDZK1IP1
cluster_1	chr1_47208171_47209488	11.6635816505568	5.36620337714697	4.38497757244968	3.72422378829731	0.942165422325371	Distal Intergenic	TAL1
cluster_1	chr1_47230720_47231880	13.0946038890953	3.74197068640598	4.04128449654696	1.75867840638424	0.834398245084608	Promoter (<=1kb)	TAL1
cluster_1	chr1_47449814_47450523	12.1446952059955	4.63710513981241	2.36933769976103	3.97714321675996	0.896775253524465	Distal Intergenic	FOXD2
cluster_1	chr1_4755127_4756094	10.5225692212324	3.82845040938731	1.36863801666549	2.90399553489594	0.898204810497581	Intron (ENST00000378191.5/55966, intron 2 of 5)	AJAP1
cluster_1	chr1_47984034_47984965	12.8922493121129	7.28091385036727	5.08097928751646	3.73507598261847	0.854354234104421	Intron (ENST00000606738.3/388630, intron 2 of 6)	TRABD2B
cluster_1	chr1_48498130_48498895	12.0503887667039	4.55088718052329	7.53433819209817	6.49230033089069	0.584821099780965	Distal Intergenic	SPATA6
cluster_1	chr1_50047783_50048993	5.6768283573958	0.876663943478296	2.04689981080545	2.39541304935171	0.629690952314934	Promoter (<=1kb)	ELAVL4
cluster_1	chr1_50332913_50334033	20.4778872316589	7.85453934843003	12.0369579753934	9.17143988368594	0.650343213564414	Distal Intergenic	LINC02808
cluster_1	chr1_50416709_50417217	19.2281505014098	5.94281731466248	3.32177826879383	3.43565204514845	0.969017196123936	Distal Intergenic	DMRTA2
cluster_1	chr1_50430513_50431212	10.3822830058618	5.3417647327939	2.87802137115201	3.29888156831345	0.920968557291875	Distal Intergenic	LOC105378714
cluster_1	chr1_50620596_50621387	15.2725148075552	1.79606295337949	2.58925464776739	2.50251141987947	0.81233569315488	Intron (ENST00000396153.7/11124, intron 8 of 18)	FAF1
cluster_1	chr1_50873368_50874053	12.1456065958102	3.85615724782791	3.39780670258965	2.22729342303711	0.898402848175146	Intron (ENST00000396153.7/11124, intron 1 of 18)	FAF1
cluster_1	chr1_5119148_5120233	9.25676046312625	2.33424411492354	2.06717100863222	1.65415559672099	0.894890712366139	Distal Intergenic	LINC02782
cluster_1	chr1_51296315_51297353	14.9667433378353	6.54140717391814	6.99538169468182	3.13229594535382	0.753571967848991	Promoter (<=1kb)	TTC39A
cluster_1	chr1_51344498_51345687	16.7821399185865	5.09364717980844	3.17076386937388	2.614382012991	0.958334777204497	Promoter (<=1kb)	TTC39A
cluster_1	chr1_52006090_52007000	9.80552792841396	5.99010853821024	2.84724823667347	1.93295801696016	0.76206848700496	Distal Intergenic	RAB3B
cluster_1	chr1_52904662_52905476	9.59179002761764	3.660932884761	1.20740742933852	2.18128654849275	0.927783948697648	Promoter (<=1kb)	ECHDC2
cluster_1	chr1_52920785_52921971	13.8566916752827	5.54411088613688	2.8595447538901	2.21806618681548	0.94417926882252	Promoter (<=1kb)	ECHDC2
cluster_1	chr1_53119906_53121005	14.1823367503905	6.02091338818205	2.77727745819744	3.19934751160091	0.951957277745746	Intron (ENST00000611397.5/6512, intron 2 of 9)	SLC1A7
cluster_1	chr1_53430234_53431300	18.4943930767094	2.78788566844824	2.2895331869782	2.25816357599678	0.878155265859454	Intron (ENST00000563752.5/163742, intron 1 of 2)	SLC25A3P1
cluster_1	chr1_53434651_53435852	14.7366689331594	2.81954176242693	1.79436970289767	1.65197811504657	0.916699625512032	Intron (ENST00000563752.5/163742, intron 1 of 2)	SLC25A3P1
cluster_1	chr1_53448260_53448919	14.5807957770622	4.11639111776978	2.6727076822897	2.27140830066159	0.948177313257562	Distal Intergenic	SLC25A3P1
cluster_1	chr1_53448979_53450129	8.56150197908806	3.61389587730977	1.80056584404407	1.62757243338127	0.946510705581403	Distal Intergenic	SLC25A3P1
cluster_1	chr1_53470013_53470926	25.4303919465109	7.14007353702936	5.74819747856987	3.20108362463202	0.907398534454294	Distal Intergenic	DMRTB1
cluster_1	chr1_53552003_53552855	7.22290594697079	2.6963702626554	2.14619708313657	3.59174703692549	0.74570097029416	Intron (ENST00000312233.4/148979, intron 3 of 9)	DMRTB1
cluster_1	chr1_53704992_53705973	13.0857665410865	1.5032864512072	2.00140203679772	1.44111995156179	0.836830088059241	Intron (ENST00000312233.4/148979, intron 1 of 9)	GLIS1
cluster_1	chr1_53860832_53861592	10.6184272594833	5.11238803520002	2.10423424568461	3.77631942508295	0.860084664657155	Intron (ENST00000464950.6/54432, intron 8 of 10)	NDC1
cluster_1	chr1_53982371_53983268	11.2936764980126	4.23700861342999	1.79847665342653	3.74589004996492	0.867211867626585	Distal Intergenic	LRRC42
cluster_1	chr1_54135483_54136866	8.24696425643173	7.44326073606634	2.99517586556153	3.07022764631535	0.542686004327241	3' UTR	CDCP2
cluster_1	chr1_54342151_54343029	12.9500769205841	4.31025227135501	4.82506935853426	2.75398663511139	0.822883061603385	Intron (ENST00000326956.12/23648, intron 1 of 13)	SSBP3
cluster_1	chr1_54375708_54376212	13.0748281092508	4.47708966460359	2.37695447905427	5.34576094604137	0.788631945606886	Intron (ENST00000533946.6/23648, intron 2 of 5)	SSBP3
cluster_1	chr1_54480443_54480876	17.086875490023	4.70943090836483	3.51732496579403	1.89760537808535	0.917090263534471	Distal Intergenic	LOC105378735
cluster_1	chr1_54571270_54572513	11.9429854056798	4.23377525523025	2.09833315057845	2.40950508428631	0.979124159638815	Intron (ENST00000481208.5/26027, intron 1 of 14)	ACOT11
cluster_1	chr1_54579281_54580013	9.47022090342418	6.22470435371313	1.34919660341854	1.98457233307238	0.699124967751662	Intron (ENST00000481208.5/26027, intron 1 of 14)	ACOT11
cluster_1	chr1_54610559_54611252	6.26558405672977	4.23045129196753	1.16492484053553	1.98875426943619	0.699491576292946	Intron (ENST00000371316.3/26027, intron 15 of 16)	FAM151A
cluster_1	chr1_54774830_54775580	15.0713349916526	1.97974993479438	3.12585943983933	2.98875492091344	0.791228972074305	Distal Intergenic	PARS2
cluster_1	chr1_54780962_54781858	14.3519608458748	4.56429604919823	2.12013735121864	4.02554542714223	0.89416175351235	3' UTR	TTC22
cluster_1	chr1_54800676_54801798	11.0771972323732	2.76095704462164	2.00282097366988	1.85628806057736	0.921020519907378	Promoter (<=1kb)	TTC22
cluster_1	chr1_54813487_54814221	10.0405401678731	3.22727238217077	2.366521380701	2.75278835566128	0.917419443162801	Exon (ENST00000358193.7/163747, exon 7 of 11)	LEXM
cluster_1	chr1_54980374_54981214	14.3543642903293	7.27582343071485	3.00723339674791	3.24630180667327	0.876371519745386	Promoter (<=1kb)	LOC105378736
cluster_1	chr1_55021845_55022525	23.496268165684	8.86452134457488	8.61197542139538	4.81444541929471	0.847743124468842	Distal Intergenic	PCSK9
cluster_1	chr1_55039204_55040620	14.4131448431607	7.17854071467693	5.1407760330196	5.60031394765503	0.973054671334396	Promoter (<=1kb)	PCSK9
cluster_1	chr1_56453129_56453965	13.9729203965382	4.11618271738265	2.9005880973042	4.65990051525368	0.844097201058067	Intron (ENST00000641494.1/8613, intron 3 of 5)	LINC01767
cluster_1	chr1_56535099_56536044	24.0443420882083	7.12039949576573	1.82235651531503	2.86937776909702	0.972584815201953	Intron (ENST00000371250.4/8613, intron 2 of 5)	PLPP3
cluster_1	chr1_56818600_56820024	10.8682422292448	3.25106077543373	3.34532428694157	3.69678731975235	0.826782143837123	Promoter (<=1kb)	FYB2
cluster_1	chr1_57205871_57206425	11.1357581296777	6.81840672076385	1.42957352579237	6.83422869833021	0.575439058155685	Intron (ENST00000371236.7/1600, intron 2 of 14)	DAB1
cluster_1	chr1_57307340_57307996	24.2040506052008	0.420654424127288	0.111572038707521	2.29885635491539	0.822742049585	Promoter (<=1kb)	DAB1
cluster_1	chr1_5766915_5767540	15.2395906993197	8.55860434288957	2.75892669963637	2.01570763958376	0.778199509044313	Intron (ENST00000701409.1/ENST00000701409.1, intron 1 of 3)	MIR4689
cluster_1	chr1_5830612_5831177	15.9482844927381	4.55907607861824	2.78521357012001	2.57355047153056	0.955329311354147	Distal Intergenic	MIR4689
cluster_1	chr1_5847035_5847814	9.15461912221025	8.66960141347455	3.11888415742026	2.46560603272631	0.503378945635111	Distal Intergenic	MIR4689
cluster_1	chr1_58576584_58577779	16.4850340322779	3.49127922194485	2.71348351461702	1.86481033075024	0.908128621314125	Promoter (<=1kb)	TACSTD2
cluster_1	chr1_58814296_58815686	13.1158202898208	6.0331038320693	3.97273671716523	1.18728061618708	0.802886521847975	Promoter (<=1kb)	LOC101926907
cluster_1	chr1_59013044_59014002	10.5253106016706	7.32325910189463	2.65043906338711	3.49154356826877	0.705896070368634	Intron (ENST00000634502.1/101926925, intron 3 of 13)	LINC01358
cluster_1	chr1_59084016_59084795	16.4747089369489	3.76988619007263	1.28559309268839	1.05617698735701	0.970472150387877	Intron (ENST00000634502.1/101926925, intron 12 of 13)	LINC01358
cluster_1	chr1_59146577_59147439	14.3537324654038	9.05609432170873	4.77805712838442	1.61966003393378	0.688903270732289	Promoter (<=1kb)	HSD52
cluster_1	chr1_5980213_5981239	15.2054482306465	4.25723641326247	2.59868917823153	5.44730758877962	0.803761356497623	Intron (ENST00000478423.6/261734, intron 1 of 25)	KCNAB2
cluster_1	chr1_59926337_59927145	14.688668820261	4.11426009249575	4.59895241637475	4.42172118556086	0.825878093960414	Promoter (<=1kb)	CYP2J2
cluster_1	chr1_60073561_60074291	17.6845513299327	3.50600184158255	3.35812476566234	2.6676538293029	0.874930100723317	Promoter (<=1kb)	C1orf87
cluster_1	chr1_6025796_6026522	8.348566204625	3.90185528000787	2.0842929578582	2.82515141278333	0.927554032679907	Promoter (<=1kb)	KCNAB2
cluster_1	chr1_60886726_60887474	14.2495830245655	4.21705930721186	3.7140103589886	4.16162129469439	0.873288824212165	Intron (ENST00000371191.5/4774, intron 1 of 10)	LOC101926964
cluster_1	chr1_60942411_60943487	6.4038298344237	4.33026303914491	1.37401888935504	1.42619388075998	0.700492056435589	Intron (ENST00000371191.5/4774, intron 1 of 10)	NFIA-AS2
cluster_1	chr1_61042484_61043999	12.5975798619087	5.20352697224605	4.1517339503201	7.4491808232128	0.672336044727886	Intron (ENST00000371191.5/4774, intron 1 of 10)	NFIA
cluster_1	chr1_61079881_61080190	22.9457701296882	9.25448504596415	5.0438712812566	16.936263764933	0.519894377012926	Promoter (1-2kb)	NFIA
cluster_1	chr1_6148396_6149291	20.0713249837311	10.952938147561	7.9164214967912	9.27587377790515	0.938596668445519	Exon (ENST00000262450.8/26038, exon 8 of 42)	CHD5
cluster_1	chr1_61641613_61642242	13.7089264734078	5.91703391792491	3.31023002205743	0.801410168123961	0.828744759988969	Distal Intergenic	MGC34796
cluster_1	chr1_6204856_6205602	29.8552697939456	11.0480461202735	5.49610062327688	5.80012752828545	0.979327608889841	Promoter (<=1kb)	RNF207
cluster_1	chr1_6205858_6206485	30.4648589629655	13.6993944151706	5.32898103158921	5.6820448348777	0.911106525661691	Promoter (<=1kb)	RNF207
cluster_1	chr1_62194390_62195219	29.8113007905677	6.86834732021906	2.37313297787552	1.98436028486692	0.970607314432464	Promoter (<=1kb)	L1TD1
cluster_1	chr1_62198104_62199023	31.2189068048795	2.37207845754026	1.01606867388201	1.83763203103994	0.877923327813995	Intron (ENST00000498273.2/54596, intron 2 of 3)	L1TD1
cluster_1	chr1_62212493_62214026	21.1220552475095	0.427997162371583	0.701221907396004	0.828973299665566	0.842724574408902	Downstream (<=300bp)	L1TD1
cluster_1	chr1_62263228_62264029	7.03636818807491	3.73737184147213	0.706119404781025	1.79315863535423	0.791124130225293	Promoter (<=1kb)	KANK4
cluster_1	chr1_62279074_62279814	11.3874281260158	6.37545324968366	2.16526066018111	3.18805119626041	0.815926285707141	Intron (ENST00000371153.9/163782, intron 2 of 9)	KANK4
cluster_1	chr1_62327265_62328153	15.4849326677555	1.62492599900069	1.32158295913736	1.45655719673573	0.867217206409256	Distal Intergenic	KANK4
cluster_1	chr1_6267889_6268784	8.65041535848996	7.18913856362304	2.53938436084128	4.63554948664525	0.572680079951246	Intron (ENST00000608083.5/11332, intron 8 of 8)	GPR153
cluster_1	chr1_62755754_62756804	15.5763578484175	1.09366934529145	0.985891420996908	2.5576930749907	0.809390829645106	Distal Intergenic	ATG4C
cluster_1	chr1_62962881_62963636	8.82487186788372	5.27434723597796	3.85566738643978	3.11596436430581	0.866149780554385	Distal Intergenic	LINC01739
cluster_1	chr1_63189572_63190394	20.8047026855001	1.54607212233598	1.57932475410973	1.83854039088643	0.848579922716857	Exon (ENST00000455304.6/199899, exon 5 of 5)	LINC00466
cluster_1	chr1_63294678_63295496	17.1554208652896	3.35547052961292	1.47854591814062	1.74098835501111	0.93766960285143	Intron (ENST00000666431.1/199899, intron 2 of 10)	LINC00466
cluster_1	chr1_63316826_63317841	27.6432021733576	8.56222221523805	5.57770752451854	3.13538740143785	0.933713068204318	Promoter (<=1kb)	LINC00466
cluster_1	chr1_63322230_63322875	25.2522041119824	12.7972307727508	10.1594322418318	4.88153541993161	0.794341503327085	Promoter (<=1kb)	FOXD3-AS1
cluster_1	chr1_63327552_63327987	26.2602458209606	9.21910804301842	10.0575154876163	4.46455127498743	0.801497842997979	Promoter (<=1kb)	MIR6068
cluster_1	chr1_63441311_63442081	10.4948011602571	3.26143200175752	4.59640277479847	2.92032893289112	0.75207489298355	Intron (ENST00000492655.1/23421, intron 1 of 1)	ITGB3BP
cluster_1	chr1_63574011_63574849	9.77495389333992	3.75392582347953	1.1324011451302	1.84383371173315	0.935418526839505	Intron (ENST00000478138.1/23421, intron 1 of 4)	PGM1
cluster_1	chr1_6363107_6363514	15.3304442760327	7.26421078154853	3.60318543456363	7.10789470593616	0.791628741418227	Promoter (2-3kb)	ACOT7
cluster_1	chr1_63674338_63674866	10.5816370791799	4.09110577958414	1.75870823023829	2.38583212882462	0.957370537137626	Distal Intergenic	PGM1
cluster_1	chr1_63782832_63783651	17.6300337533898	3.14522333095719	1.12815183672189	2.11884526983286	0.919386712766537	Intron (ENST00000371079.6/4919, intron 1 of 8)	ROR1
cluster_1	chr1_63804652_63805455	9.41227222996085	4.48126137676988	1.43084543309844	2.28653200073904	0.876224041339062	Intron (ENST00000371079.6/4919, intron 1 of 8)	ROR1
cluster_1	chr1_6385524_6386385	19.1065822300604	7.37671529872857	2.4217076935992	5.46777429913885	0.884965574927594	Promoter (<=1kb)	ACOT7
cluster_1	chr1_6414282_6414798	13.618621470506	6.7941642402629	2.88022363212544	4.83704377546891	0.862909798408339	Intron (ENST00000377837.5/54626, intron 3 of 3)	HES2
cluster_1	chr1_6419466_6420085	11.803240669107	10.2824403953397	3.81706126708128	3.68137766748926	0.559533929741191	Promoter (<=1kb)	HES2
cluster_1	chr1_6423415_6423929	16.946373450946	8.89295330868696	3.12673729514554	4.64092672454684	0.848228726108852	Promoter (<=1kb)	HES2
cluster_1	chr1_6437968_6438456	22.2177615660031	4.94214182212018	2.85368378756134	7.40005341562313	0.784390211341429	Promoter (<=1kb)	ESPN
cluster_1	chr1_6440216_6441052	22.9502288784794	12.8174008940977	2.83736686631936	3.24380388698363	0.773846722347327	Promoter (<=1kb)	ESPN
cluster_1	chr1_6447029_6448524	40.2888375420267	18.1340468576965	6.05867889372654	3.91115338047672	0.865981547799107	Promoter (<=1kb)	ESPN
cluster_1	chr1_64472799_64473326	30.6948641758301	18.3443645597082	10.9589863624684	4.53241516270423	0.726594813523971	Promoter (2-3kb)	CACHD1
cluster_1	chr1_6448554_6449473	22.7527049233089	13.616947096166	5.85245402589484	5.77327664963941	0.798725603164586	Promoter (<=1kb)	ESPN
cluster_1	chr1_64497180_64497931	18.348430835936	4.47543234455252	3.8991155206903	2.6527939111191	0.897857321346918	Intron (ENST00000651257.2/57685, intron 1 of 26)	CACHD1
cluster_1	chr1_6454858_6455822	8.97114502181441	2.59871159489112	2.34648356528603	0.821139877964905	0.862064277276774	Exon (ENST00000636330.1/83715, exon 11 of 11)	ESPN
cluster_1	chr1_64572130_64572926	11.3187171471423	7.27934573763297	3.01520627542526	1.8365261005106	0.71570189551014	Intron (ENST00000651257.2/57685, intron 2 of 26)	MIR4794
cluster_1	chr1_6465541_6466544	14.2301455707611	4.60237723657264	2.39346103281906	2.24839300748465	0.978227198517813	Promoter (<=1kb)	TNFRSF25
cluster_1	chr1_6470841_6471864	14.5358411938242	3.25368497865477	1.89823843979703	1.85661301361289	0.934897090224447	Promoter (<=1kb)	PLEKHG5
cluster_1	chr1_6486189_6486857	24.9205101154019	12.0118988699265	9.50358139502577	10.6688960582195	0.936392033695609	Promoter (<=1kb)	PLEKHG5
cluster_1	chr1_65026101_65026908	14.5168760172898	1.67971816236801	1.27190930277464	1.44777634336247	0.872842048330142	Intron (ENST00000671954.2/3716, intron 2 of 25)	LINC01359
cluster_1	chr1_65148385_65149635	20.8034626162256	8.81262710750911	12.2484507625762	10.3843319899938	0.672487440699732	Promoter (<=1kb)	AK4
cluster_1	chr1_65175225_65176035	6.21292326145392	2.18136248839329	0.964901851230184	2.76160869987255	0.743834676610186	Intron (ENST00000497030.5/205, intron 2 of 5)	AK4
cluster_1	chr1_65278460_65279548	9.06555971896493	3.16363500653261	2.63299659364915	3.08630860016161	0.88477921425954	Exon (ENST00000435739.1/102724416, exon 2 of 2)	DNAJC6
cluster_1	chr1_65550035_65551005	11.5577697359926	1.56808492136481	0.634248113577141	0.723850167572539	0.915713571942588	Intron (ENST00000371059.7/3953, intron 2 of 19)	LEPR
cluster_1	chr1_66751844_66753037	18.1896244567123	10.7976869772274	9.17678814796024	5.41916070720735	0.759551005744055	Promoter (<=1kb)	DYNLT5
cluster_1	chr1_67341905_67342746	14.6544404656457	2.38102568794969	1.5680404743654	2.21709664370413	0.880679475510529	Promoter (<=1kb)	IL12RB2
cluster_1	chr1_67347584_67348387	12.7853214096872	6.48895972920888	3.8389061939196	4.36460202877296	0.9437114308225	Intron (ENST00000262345.5/3595, intron 8 of 15)	IL12RB2
cluster_1	chr1_67458648_67459424	19.4760204067164	3.62532371807834	1.09756814354073	1.74478489863628	0.942615211039981	Distal Intergenic	SERBP1
cluster_1	chr1_69077171_69078354	9.18056851723573	4.99177897619421	2.32019882157034	2.14037932736237	0.850953753262886	Intron (ENST00000658427.1/105378787, intron 1 of 3)	LINC01707
cluster_1	chr1_6956609_6957239	15.5096636102453	5.05921274127403	0.985694173718488	2.81560260040643	0.92587817937567	Intron (ENST00000303635.12/23261, intron 3 of 22)	CAMTA1
cluster_1	chr1_6962067_6963981	67.4278642466788	24.1653563799131	10.5323551918838	6.93171809934693	0.943665944842768	Intron (ENST00000303635.12/23261, intron 3 of 22)	CAMTA1
cluster_1	chr1_70674852_70676196	10.9953591032061	3.06156644690642	3.14832239310787	4.69717504424932	0.743112089521163	Distal Intergenic	LINC01788
cluster_1	chr1_70685133_70685730	13.2622661786564	4.30700747903234	5.13066102079229	3.23957308565973	0.810713674545146	Distal Intergenic	LINC01788
cluster_1	chr1_70706191_70707121	10.6314377837091	5.42905179042783	7.35389260297073	1.60435352320521	0.530674457127986	Promoter (<=1kb)	LINC01788
cluster_1	chr1_72724767_72725687	12.9578768557047	4.56063589635067	4.07512573995097	2.64171050404026	0.891691733147196	Intron (ENST00000659328.1/105378797, intron 4 of 4)	LOC105378798
cluster_1	chr1_7297867_7298543	15.0341445045131	3.0715670522578	0.308434344010751	2.66107057445409	0.885866422673987	Intron (ENST00000303635.12/23261, intron 5 of 22)	CAMTA1
cluster_1	chr1_74673190_74674302	9.69479403264411	4.08663717054551	7.03095658797654	3.71443304190364	0.541724328643247	Promoter (<=1kb)	ERICH3
cluster_1	chr1_75092024_75092643	19.3027270287975	7.64019066497219	2.17979804112186	0.868672716427507	0.885056360867613	Distal Intergenic	LHX8
cluster_1	chr1_75672194_75673163	15.2079005321486	2.76401062650934	1.16653546006051	2.02056367704525	0.912944065881598	Intron (ENST00000648424.1/204962, intron 2 of 2)	SLC44A5
cluster_1	chr1_75677690_75678592	17.781876330967	4.13350414828516	6.83022907035951	4.1648151637461	0.743027160169005	Intron (ENST00000648424.1/204962, intron 2 of 2)	SLC44A5
cluster_1	chr1_75796638_75797825	12.076165313131	1.65282679686012	2.3996994552154	2.40163012627376	0.799897472212703	Promoter (<=1kb)	MSH4
cluster_1	chr1_76052931_76053625	13.7353862857565	4.14671429366985	5.73938557255183	6.9283599281359	0.665899954763557	Intron (ENST00000434540.1/ENST00000434540.1, intron 1 of 1)	ST6GALNAC3
cluster_1	chr1_77514290_77515949	11.4788351495919	5.84680734865478	3.12530578410933	1.88776882707885	0.841563283973188	Intron (ENST00000354567.7/26289, intron 10 of 13)	AK5
cluster_1	chr1_77687272_77688176	18.8960242969706	2.02280385445562	2.51118730418053	0.837332821929763	0.854408307657109	Distal Intergenic	ZZZ3
cluster_1	chr1_77888114_77889624	23.990035902784	15.3563892166732	14.2332965539893	8.13461069814669	0.688901686778068	Promoter (<=1kb)	NEXN-AS1
cluster_1	chr1_78045384_78046838	12.4590620631742	7.09763782485051	5.96932267124011	4.02418641751267	0.821619889815943	Promoter (<=1kb)	GIPC2
cluster_1	chr1_78154950_78155594	13.30746642072	5.10703043636407	4.09493631035581	2.46526041338598	0.898095184423433	Distal Intergenic	MGC27382
cluster_1	chr1_7885339_7886267	33.5410723729777	2.95440528310976	0.405680982574956	1.72065915411764	0.89656164697723	Distal Intergenic	UTS2
cluster_1	chr1_79006372_79007102	18.8459756537862	7.54921419423498	6.95216069066805	1.66808297064882	0.768829227180938	Promoter (<=1kb)	ADGRL4
cluster_1	chr1_7902546_7903121	12.8467026770428	3.18340164167108	2.83523974890721	5.81313434444963	0.701365043306533	Distal Intergenic	TNFRSF9
cluster_1	chr1_79044935_79045557	14.333156094374	1.75540639898203	1.98530498802935	1.88058850367891	0.843961213932036	Intron (ENST00000661030.1/64123, intron 3 of 16)	ADGRL4
cluster_1	chr1_79193079_79193899	14.7776279526932	5.6662756507777	1.56653691367812	2.81004076930672	0.928267480607975	Intron (ENST00000661030.1/64123, intron 1 of 16)	ADGRL4
cluster_1	chr1_79262633_79263394	18.6723421448175	4.0142450517906	2.09374356792187	1.52390815902462	0.944968804417346	Intron (ENST00000661030.1/64123, intron 1 of 16)	ADGRL4
cluster_1	chr1_7974970_7975688	13.0756923718104	6.39479673368501	4.17210386716312	5.41164615547312	0.919268053474592	Intron (ENST00000493373.5/11315, intron 5 of 6)	PARK7
cluster_1	chr1_7991637_7992452	20.2527773579887	6.67631202979586	1.12576372478787	1.19635796712281	0.941924111146328	Intron (ENST00000641354.1/ENST00000641354.1, intron 1 of 5)	ERRFI1
cluster_1	chr1_81312191_81312971	12.9975672101342	2.52203020032671	1.93422876573223	1.3272562898435	0.905476920730722	Intron (ENST00000674378.1/23266, intron 1 of 5)	ADGRL2
cluster_1	chr1_8166847_8167690	19.2902489095447	2.85132923545936	0.99983876867029	3.03631389328941	0.872625378439257	Distal Intergenic	LINC01714
cluster_1	chr1_81682119_81683065	11.5634702771345	6.73550222603694	1.30247734945527	2.34127934989061	0.75582428491807	Intron (ENST00000674378.1/23266, intron 4 of 5)	ADGRL2
cluster_1	chr1_8216853_8217809	15.2372087485246	7.53052553298087	2.3101646124532	1.80754297958534	0.834425215205828	Distal Intergenic	LINC01714
cluster_1	chr1_8266282_8267745	16.1689723877015	9.00821568819353	3.41129161965826	3.99702806058487	0.827100519190722	Distal Intergenic	SLC45A1
cluster_1	chr1_8314253_8314916	15.451646591189	6.32178470924768	4.71748419251309	8.94220889753262	0.678417425909663	Distal Intergenic	SLC45A1
cluster_1	chr1_8348930_8349488	11.0678255149087	6.71725023344233	3.00387094142135	2.57585859702018	0.783616094027878	Distal Intergenic	RERE
cluster_1	chr1_83860345_83861275	17.974964435596	3.20345740310331	4.91106761879235	1.83523999013005	0.796976803377731	Promoter (<=1kb)	LOC101927560
cluster_1	chr1_8408919_8409526	7.66128548155601	4.46717021510353	1.41955226250318	3.61259705764282	0.712369354461482	Intron (ENST00000337907.7/473, intron 13 of 23)	RERE
cluster_1	chr1_8443368_8444254	26.684269991542	1.56561232916653	1.2379054555396	0.849165059667798	0.869023303549747	Intron (ENST00000337907.7/473, intron 12 of 23)	RERE-AS1
cluster_1	chr1_84740031_84741018	7.52833763145227	1.79362941057419	1.97879465781135	3.6781885406132	0.663942669757284	Distal Intergenic	SSX2IP
cluster_1	chr1_84763575_84764739	6.54459554623721	2.0445049695105	2.278818472859	3.88952365302411	0.613460173881276	Distal Intergenic	SSX2IP
cluster_1	chr1_84892292_84893619	20.9325632020864	8.28373553777883	7.54945202375979	4.42930907932918	0.864207960344676	Promoter (<=1kb)	LPAR3
cluster_1	chr1_8517592_8518579	6.02395392383163	4.45565958814713	1.21872757693171	3.56984249398942	0.570286270737157	Intron (ENST00000337907.7/473, intron 8 of 23)	RERE
cluster_1	chr1_85607046_85607923	20.8606021289033	10.5106867788843	4.02795452480034	2.49754086849251	0.828076296753532	Distal Intergenic	CCN1
cluster_1	chr1_85628650_85629792	9.88658053885186	2.03418199938237	2.75838629055178	1.05215706102741	0.809773996185551	Distal Intergenic	CCN1
cluster_1	chr1_86154743_86155534	14.7896538852499	6.92575954706354	6.8739424961535	2.57013894811225	0.732135092538041	Promoter (1-2kb)	COL24A1
cluster_1	chr1_86502125_86503509	20.2188531110639	4.45557997008575	4.75975333721422	3.09892920435902	0.861006509601929	Distal Intergenic	CLCA1
cluster_1	chr1_86833475_86834124	12.6210417571978	7.33714613036929	6.49769459697835	2.91189110435435	0.698839109498758	Promoter (<=1kb)	LOC105378831
cluster_1	chr1_86933563_86934910	8.92380292762962	2.53272065261873	1.93134419227924	1.29306095268419	0.923286435337136	Exon (ENST00000585888.1/ENST00000585888.1, exon 1 of 2)	HS2ST1
cluster_1	chr1_8873383_8874035	17.4012134425649	6.54771975669466	2.40115732215288	6.20693890935862	0.828104373202528	Promoter (1-2kb)	ENO1
cluster_1	chr1_89808417_89809054	8.87168118771721	7.97265715837864	1.67673910876715	2.52175655717892	0.531409128504018	Intron (ENST00000370453.5/55144, intron 2 of 3)	LRRC8D
cluster_1	chr1_89910681_89911250	26.8449084078338	10.2149253226139	5.46178977792437	3.62507411561535	0.937914778480431	Intron (ENST00000370453.5/55144, intron 3 of 3)	LRRC8D
cluster_1	chr1_89929103_89930124	17.6431750356921	3.04924857800193	0.55709486962513	1.86567943542215	0.925444411155732	5' UTR	GEMIN8P4
cluster_1	chr1_9009154_9010438	12.7544676860773	3.4978463243799	1.69157476808707	1.49501570706643	0.970258976484852	Exon (ENST00000400906.2/155184, exon 9 of 12)	SLC2A7
cluster_1	chr1_90219064_90219971	17.7960454504642	11.3645415182492	3.62485590710224	3.82090784493393	0.73259573320485	Distal Intergenic	LOC105378849
cluster_1	chr1_90561548_90562435	17.9490463606983	3.49868842082681	6.58819184188386	5.79903916535449	0.704428662200794	Distal Intergenic	LINC02787
cluster_1	chr1_90706446_90707734	16.7417048520653	13.3331729370519	11.5409141932316	6.28334501918858	0.547465635403802	Distal Intergenic	BARHL2
cluster_1	chr1_90707793_90708691	7.1177198264967	2.8202456719307	1.33196717117764	2.0568093523399	0.929365367443985	Distal Intergenic	BARHL2
cluster_1	chr1_90710766_90711090	19.2280060347492	8.76739717571293	11.6405373872878	5.32340608765215	0.644944058626525	Distal Intergenic	BARHL2
cluster_1	chr1_90719671_90720536	10.7723342783028	3.16935285243857	2.94773888259742	2.56121304047953	0.887768783344946	Promoter (2-3kb)	BARHL2
cluster_1	chr1_90723601_90724118	21.5497295873421	4.50479695039744	3.06506791718021	3.52451612826196	0.903799840304201	Exon (ENST00000660766.1/ENST00000660766.1, exon 2 of 3)	BARHL2
cluster_1	chr1_90924785_90925583	10.6450863872461	3.84791759116361	1.70308923250629	1.35551276946413	0.95688957515937	Intron (ENST00000370440.5/84146, intron 4 of 5)	ZNF644
cluster_1	chr1_90974030_90974931	12.5157622296816	1.8094410178935	1.39754144358852	3.02300846198314	0.805917438324836	Intron (ENST00000370440.5/84146, intron 2 of 5)	ZNF644
cluster_1	chr1_9101305_9102017	9.9896746456725	4.63643302901652	2.92051966474018	2.93232352118687	0.971587760446544	3' UTR	GPR157
cluster_1	chr1_91103966_91105170	6.20765875587572	1.32343122907298	2.04433090259274	2.3996005864416	0.706679180873804	Distal Intergenic	ZNF644
cluster_1	chr1_9128359_9129951	23.1627388664677	15.6411714213749	4.96732855589108	8.844820580838	0.704306070557293	Promoter (<=1kb)	GPR157
cluster_1	chr1_91644881_91645622	12.0042179314114	8.9016592938636	1.66016655640261	2.71655186669461	0.630492234726941	Distal Intergenic	TGFBR3
cluster_1	chr1_9196418_9197002	12.1226557162213	6.70071742157131	3.37020581451581	6.27808524876621	0.758591716314877	Exon (ENST00000635405.2/ENST00000635405.2, exon 1 of 2)	LNCTAM34A
cluster_1	chr1_92080016_92081021	38.7772090369312	21.1921072899205	24.2170020718666	15.3431607649736	0.704609156105899	Promoter (<=1kb)	BTBD8
cluster_1	chr1_92425367_92426118	7.31509104401318	3.86521164018675	1.90224827415051	1.24607913599969	0.830420904997529	Distal Intergenic	GFI1
cluster_1	chr1_9249807_9250407	13.1987548954716	4.77961618970982	2.39275769495399	4.11059869229476	0.898535678573407	Intron (ENST00000377403.7/9563, intron 3 of 4)	H6PD
cluster_1	chr1_9266832_9267568	17.2200677428777	5.77439201966332	4.51872658603974	4.53548309611598	0.927662111038933	3' UTR	SPSB1
cluster_1	chr1_93000296_93001245	10.5819039680312	5.67977626208039	1.39803825767054	1.9503758423325	0.8054502230783	Distal Intergenic	DIPK1A
cluster_1	chr1_9320530_9321892	6.30461099923443	3.95394129669426	1.8473947737546	4.99073114248566	0.506516893466036	Intron (ENST00000328089.11/80176, intron 1 of 2)	SPSB1
cluster_1	chr1_93410928_93411978	9.3470649002803	0.782312060091212	1.19429353529306	2.36749859124048	0.750954165149644	Distal Intergenic	FNBP1L
cluster_1	chr1_9455733_9456234	12.6235389758543	6.87763976469718	3.09157160350978	3.64786584510071	0.864487578438742	Distal Intergenic	LINC02606
cluster_1	chr1_94623402_94624373	9.32550887090903	3.53720330010074	3.24605868484834	1.43611777582921	0.834577247581245	Promoter (<=1kb)	SLC44A3-AS1
cluster_1	chr1_94660844_94661719	14.3529117134013	10.4724321630578	5.22220225574953	2.53872249211708	0.63535648361824	Promoter (2-3kb)	SLC44A3-AS1
cluster_1	chr1_94688504_94689357	19.3537219523913	5.3331373592379	4.81091818080828	2.17193963413977	0.878724506149487	Intron (ENST00000634870.1/101928079, intron 2 of 5)	SLC44A3-AS1
cluster_1	chr1_9494924_9495850	11.9659743495839	4.80574963281366	2.08831576045122	3.4702973678495	0.917928663144605	Distal Intergenic	SLC25A33
cluster_1	chr1_9626861_9627603	18.3992352709437	9.72220315785076	5.58227920295572	5.1110182674422	0.901171666299533	Promoter (2-3kb)	PIK3CD
cluster_1	chr1_96715137_96716004	22.9775076646447	0.816042075050075	0.798119268428467	2.26679844465296	0.827089985215509	Distal Intergenic	PTBP2
cluster_1	chr1_9714193_9714971	25.5514133640136	1.24885577177176	0.6325779432234	1.43314688938381	0.860672170605583	Promoter (<=1kb)	PIK3CD
cluster_1	chr1_9717352_9718032	17.1028525513671	2.57526864727551	1.52660535017632	2.31924859719929	0.883939895957478	Promoter (<=1kb)	PIK3CD
cluster_1	chr1_9721477_9722113	20.3224514902723	4.23236113357799	2.84039446763497	1.97563700054048	0.922672109124401	Promoter (<=1kb)	PIK3CD
cluster_1	chr1_9724850_9725369	20.2302600100578	3.90326540617918	1.72336677737022	2.99964520436371	0.911144107285749	3' UTR	PIK3CD
cluster_1	chr1_9792182_9792932	16.7719011430866	4.61412269149587	2.27916035413634	2.4441279482747	0.966067088757573	Intron (ENST00000377298.9/22883, intron 1 of 18)	CLSTN1
cluster_1	chr1_9825232_9825792	14.6306185496471	6.87559660425267	2.50106760932236	4.72146103649812	0.864331421582365	Promoter (1-2kb)	CLSTN1
cluster_1	chr1_9859144_9859954	8.73026444401732	4.44613200497168	2.82972474227737	1.61725201050064	0.838760892485598	Intron (ENST00000377263.6/56998, intron 5 of 5)	CTNNBIP1
cluster_1	chr1_9867413_9868147	12.9977240060528	5.26726486586695	4.12719014677717	5.06526116009978	0.894753663056995	Intron (ENST00000377263.6/56998, intron 5 of 5)	CTNNBIP1
cluster_1	chr1_9890075_9890915	12.0872400734765	5.0909869464819	2.49160067636757	6.01763609385259	0.730619429434829	Promoter (2-3kb)	CTNNBIP1
cluster_1	chr1_99514584_99515499	16.1218633721328	1.2516776820637	0.958579651256567	1.55116850365459	0.853582641508542	Intron (ENST00000635551.1/101928270, intron 2 of 4)	LINC01708
cluster_1	chr1_9960752_9961608	8.37162081850935	3.66475524968599	1.81096498029608	2.88849005122404	0.900047947928933	Promoter (<=1kb)	TMEM274P
cluster_1	chr1_99736958_99737433	9.09766071911742	2.82684791302656	6.03834249859927	4.50914897383952	0.527713685940438	Intron (ENST00000646001.2/391059, intron 7 of 16)	FRRS1
cluster_1	chr10_100300910_100301606	19.5421061589198	9.40063982852765	2.46273567455897	0.95154013479016	0.812969041132759	Intron (ENST00000318222.4/9033, intron 2 of 15)	BLOC1S2
cluster_1	chr10_100342344_100342718	23.4264123565032	9.88153052464334	7.96483670321343	6.71721471797756	0.942327469145304	Intron (ENST00000429420.1/ENST00000429420.1, intron 2 of 3)	SCD
cluster_1	chr10_100364630_100365437	9.787540733018	0.983720053035921	1.08326485108626	4.15458202730606	0.644984976772457	3' UTR	OLMALINC
cluster_1	chr10_100637744_100638401	12.5633211420028	6.84404787978083	4.75502860757109	1.04128505474431	0.707173204530127	Distal Intergenic	PAX2
cluster_1	chr10_100656472_100656910	17.253571140904	6.47617268209371	4.67240452296139	1.84765653931421	0.871030875626217	Distal Intergenic	PAX2
cluster_1	chr10_100729109_100730169	11.4382475776864	5.62181454693522	3.40283578002977	2.74061545815257	0.911372890346615	Distal Intergenic	PAX2
cluster_1	chr10_100737263_100737940	15.4671887527034	4.27867609964022	3.15123694813647	2.33021705421771	0.929615487665427	Promoter (1-2kb)	PAX2
cluster_1	chr10_100745103_100746286	21.5952730702828	10.0816255240346	4.86373487280743	4.95616568513766	0.92586467232888	Promoter (<=1kb)	PAX2
cluster_1	chr10_100866454_100867171	11.1009540174633	5.33613294774179	2.94432414532788	2.53389599230217	0.917255387759887	Distal Intergenic	SLF2
cluster_1	chr10_100968878_100970451	20.0955910274554	12.2649021001763	7.66998399590277	8.26606431400412	0.886647555439155	Promoter (<=1kb)	SEMA4G
cluster_1	chr10_101018310_101019485	13.7237372745009	9.12008639449768	7.3211692540077	4.78737903956935	0.736447797022328	3' UTR	PDZD7
cluster_1	chr10_101050096_101050669	16.6004973852788	8.68746828568083	4.39121253533629	6.01494877608968	0.891206746296719	Distal Intergenic	KAZALD1
cluster_1	chr10_101095374_101096089	34.5189108952936	5.8585140968224	3.55326431595146	4.42395049907198	0.899847963442348	Intron (ENST00000445873.5/100038246, intron 2 of 2)	KAZALD1
cluster_1	chr10_101139581_101140266	9.32906644910858	7.18059144249392	4.31921332673584	1.54220608781391	0.575569938392607	Distal Intergenic	TLX1
cluster_1	chr10_101146618_101147479	8.35730726368839	2.30231611649468	1.40669829985974	2.2944887499561	0.879229996438767	Distal Intergenic	TLX1
cluster_1	chr10_101161578_101162435	12.8117372143579	6.59509747957319	3.85828067270648	3.36149268712685	0.905589059356911	Distal Intergenic	LINC01514
cluster_1	chr10_101236342_101237571	14.7266885260557	6.99347736195509	1.98587147159317	2.27323155527753	0.862189137999592	Promoter (<=1kb)	LBX1-AS1
cluster_1	chr10_101272124_101272846	15.182881994712	5.27525645624879	4.31278268023153	5.40035667151266	0.871253279725792	Distal Intergenic	LINC02681
cluster_1	chr10_101285507_101286149	21.1788858596057	11.4895961689489	5.03098010948391	3.78674895230702	0.822588378055932	Promoter (1-2kb)	LOC105378453
cluster_1	chr10_101310335_101311747	12.2746111731935	2.76203229695216	3.03828494667548	5.82530501296924	0.66823717029765	Exon (ENST00000442188.1/ENST00000442188.1, exon 1 of 2)	LOC105378453
cluster_1	chr10_101693691_101695448	16.1984637194353	13.8740502365939	8.28980451002755	4.98613462248203	0.552445750466328	Promoter (<=1kb)	FBXW4
cluster_1	chr10_101759282_101760158	10.630403735743	6.012934290493	2.32832887564862	2.77620292891314	0.823853650284491	Distal Intergenic	FGF8
cluster_1	chr10_101779077_101779483	25.3546205578768	18.2433687581918	7.64769370274836	3.55049978797753	0.639157831190019	Promoter (<=1kb)	FGF8
cluster_1	chr10_101779916_101780210	27.3696230586854	16.767038618742	9.35533763363764	5.49577823946441	0.754434004628804	Promoter (<=1kb)	FGF8
cluster_1	chr10_101839725_101840487	21.8292085665569	11.3348315498328	7.71126338217407	10.2885658514638	0.88586902592862	Promoter (<=1kb)	KCNIP2
cluster_1	chr10_101840624_101841525	28.9271634544314	18.3989857745124	12.4883457669849	14.2871845515643	0.892629621052594	Promoter (<=1kb)	KCNIP2
cluster_1	chr10_101843362_101844151	25.7239070785918	8.26758153931596	5.2189417644847	8.78214822340715	0.855137150390107	Promoter (<=1kb)	KCNIP2
cluster_1	chr10_102169330_102170100	18.7680869012171	8.27831082688088	6.47014293098276	8.61979144505524	0.853417993280445	Distal Intergenic	NOLC1
cluster_1	chr10_102229845_102232149	17.2187970604355	10.7578548476602	7.35074113489125	6.19492528882954	0.844879964649295	Promoter (<=1kb)	PITX3
cluster_1	chr10_102403772_102404196	17.2930046972577	8.53345878453771	5.03567663435386	6.72315562500356	0.917632915667476	Promoter (1-2kb)	PSD
cluster_1	chr10_102422699_102422995	30.9247861544924	11.9020535982271	10.5802841085119	10.6090308519886	0.90265245956774	Promoter (1-2kb)	PSD
cluster_1	chr10_102435466_102435981	12.6737420940666	3.90103626023956	2.16946098709924	1.73596704328402	0.966932002499023	Promoter (<=1kb)	MIR146B
cluster_1	chr10_102629524_102630195	23.2105879289037	19.8595397050898	5.55369073803132	4.31052900090125	0.55478464983714	3' UTR	TRIM8
cluster_1	chr10_103204405_103205461	12.434395691516	4.32044742502995	2.73524865505147	5.70048696841641	0.752660704120262	Intron (ENST00000675164.1/22978, intron 1 of 19)	NT5C2
cluster_1	chr10_103230992_103232107	14.7949485025616	6.95346945767409	0.88320111030869	2.16826121679954	0.833015324266381	Intron (ENST00000675164.1/22978, intron 1 of 19)	RPEL1
cluster_1	chr10_103458744_103459329	14.4795367257742	4.26273463304862	3.59565524860684	3.1773126081394	0.909228469209423	Promoter (<=1kb)	CALHM1
cluster_1	chr10_103476257_103477154	9.60210155718934	1.99078185336988	2.8254021375754	2.36944328844193	0.789004544774855	Promoter (2-3kb)	CALHM3
cluster_1	chr10_103696358_103697008	11.5668029785516	3.08223982239166	3.98951650338276	2.73226816870365	0.804077393163216	Promoter (2-3kb)	SH3PXD2A
cluster_1	chr10_103771814_103772990	27.7515683763359	13.0084649923186	8.21636778777003	8.11296329288712	0.968282102277478	Intron (ENST00000369774.9/9644, intron 2 of 14)	SH3PXD2A-AS1
cluster_1	chr10_104045397_104046093	9.67715606115437	5.44941799245288	1.83206801294583	2.68636673025194	0.812202560375332	Promoter (2-3kb)	MIR936
cluster_1	chr10_104067011_104067850	9.50877854300522	4.029434153961	2.21672421815619	1.53804249768383	0.92114661315673	Promoter (2-3kb)	COL17A1
cluster_1	chr10_104274586_104275656	10.3972774590112	4.00830659939248	3.6634228661612	2.53624183375613	0.888553320014573	Promoter (<=1kb)	GSTO2
cluster_1	chr10_104291184_104292076	17.5935010707849	7.06752308648962	9.21698644283587	8.22731163055057	0.723189845298197	Exon (ENST00000477078.2/119391, exon 6 of 7)	GSTO2
cluster_1	chr10_104305493_104306025	16.159317837921	6.53294385186986	7.25663953045999	4.84124656298321	0.812779605210455	Distal Intergenic	GSTO2
cluster_1	chr10_104638810_104639286	19.701014037686	5.24186721744525	10.3216295299627	6.45899432899093	0.640337428979618	Promoter (2-3kb)	SORCS3
cluster_1	chr10_10798040_10799059	9.69542732582511	3.67256055254936	2.08689634196132	3.89023706873312	0.827857032724752	Promoter (<=1kb)	CELF2
cluster_1	chr10_108204177_108205209	9.52029678566243	3.36614929913637	3.79655527485914	2.47936610798143	0.822618836332586	Distal Intergenic	LINC01435
cluster_1	chr10_109934201_109935659	25.184584474008	6.7893916221548	3.08510569757778	3.60266941089025	0.966044329602811	Distal Intergenic	XPNPEP1
cluster_1	chr10_110168837_110169587	9.18933001499858	2.83092789513396	1.43504890453083	0.575924575565371	0.934127883268527	Distal Intergenic	MXI1
cluster_1	chr10_110499204_110499808	17.0248214270608	6.17491080738837	3.54810564528307	5.69309746275498	0.889424398404786	Promoter (1-2kb)	DUSP5
cluster_1	chr10_110529610_110530847	23.5384907803329	6.46421124972958	2.81840420518557	2.6296316346787	0.975510939141131	Distal Intergenic	DUSP5
cluster_1	chr10_110643068_110643602	10.3923620870433	6.31946815874974	4.68955230880388	2.59827799990047	0.747885928133152	Promoter (<=1kb)	RBM20
cluster_1	chr10_110803777_110804475	9.91386465602312	5.09140525099319	4.92373351945359	2.85455924155814	0.782327320875068	Intron (ENST00000369519.4/282996, intron 7 of 13)	RBM20
cluster_1	chr10_111136714_111137465	20.3835192372981	7.26781578692073	2.58320982636523	1.82034027883498	0.941464435570056	Distal Intergenic	ADRA2A
cluster_1	chr10_11270359_11271208	13.2903502852355	7.86595741498417	5.96125855101036	5.23619304904323	0.911344323287503	3' UTR	CELF2-AS1
cluster_1	chr10_112811712_112812888	14.3939835029411	5.64758570553987	2.82857495209476	6.00829395596202	0.804591507734123	Intron (ENST00000393077.3/143187, intron 7 of 7)	NA
cluster_1	chr10_112831933_112833062	23.6333198188313	3.10621468120382	2.26662577309298	2.27798931500561	0.883726650552659	Exon (ENST00000624062.1/ENST00000624062.1, exon 1 of 1)	LOC103344931
cluster_1	chr10_112898340_112899503	16.855533619553	8.63626893360829	2.81127055794247	3.52240867514365	0.848464436499661	Intron (ENST00000428766.2/107984158, intron 2 of 2)	LINC02935
cluster_1	chr10_112958032_112958681	11.8711714420115	4.20178270146296	2.75402294813765	5.86838198328395	0.721867256225402	Intron (ENST00000355995.9/6934, intron 3 of 14)	TCF7L2
cluster_1	chr10_113053773_113054447	30.9998129552477	4.80072983186165	1.88263917600797	6.68698597584021	0.833601583443248	Intron (ENST00000355995.9/6934, intron 5 of 14)	TCF7L2
cluster_1	chr10_113062998_113063809	10.8657978001921	4.09515243182047	1.33970121356138	0.994848205777156	0.927014730853067	Intron (ENST00000355995.9/6934, intron 5 of 14)	TCF7L2
cluster_1	chr10_113616725_113617472	10.2844319539892	4.72784657195641	2.99311321370442	2.21518081714217	0.918022984610316	Exon (ENST00000359988.4/4892, exon 26 of 42)	NRAP
cluster_1	chr10_114239155_114240246	17.2481078436322	5.49399600938029	3.91367964592795	4.13591106378594	0.936838603536003	Promoter (<=1kb)	VWA2
cluster_1	chr10_114403087_114405297	11.4645698651272	8.47261742946098	3.80062154438458	3.00697113800051	0.663015644479089	Promoter (<=1kb)	AFAP1L2
cluster_1	chr10_114874750_114875442	13.9544190124388	4.60335717683857	6.73066658121734	5.72078504502938	0.708181669131146	Intron (ENST00000369250.7/57700, intron 16 of 16)	FHIP2A
cluster_1	chr10_116608961_116610171	21.2847988866531	9.65035832472364	5.46534717149933	5.2114384616669	0.952947587941463	3' UTR	PNLIPRP2
cluster_1	chr10_116627292_116628146	12.8434101379318	3.75095438475437	4.62447427243866	3.11741154339896	0.811506233026167	Exon (ENST00000579578.6/5408, exon 6 of 13)	PNLIPRP2
cluster_1	chr10_116669717_116670701	22.212869862019	6.97983556636736	2.00344681472215	3.30105729274525	0.965020946335891	Promoter (<=1kb)	HSPA12A-AS1
cluster_1	chr10_116809440_116810531	3.89280035349265	2.83778361544216	1.65321116211708	1.05612797292615	0.667072450102695	Intron (ENST00000635765.1/259217, intron 2 of 12)	ENO4
cluster_1	chr10_117084242_117085207	14.0877222321035	3.32591867877204	1.07931017195761	1.07811502907933	0.973917871096751	Intron (ENST00000392901.10/57698, intron 1 of 17)	SHTN1
cluster_1	chr10_117162699_117163559	20.6571136200295	11.0668238254797	6.09533707692834	5.86334237471586	0.894728700660358	Intron (ENST00000654523.1/101927704, intron 1 of 3)	MIR3663
cluster_1	chr10_117240152_117242058	13.5099697911022	6.51988887840604	3.72662407316259	3.37018466734022	0.929588459358854	Promoter (<=1kb)	SLC18A2-AS1
cluster_1	chr10_117346485_117347312	25.1436146532988	1.60021836507748	1.36408791937892	0.87460434889543	0.868362122785669	Intron (ENST00000334464.7/118987, intron 1 of 4)	PDZD8
cluster_1	chr10_11742007_11743159	10.5782772021956	5.28895936067347	4.05683543381148	1.97720830636507	0.80691206233286	Promoter (<=1kb)	ECHDC3
cluster_1	chr10_117720855_117722222	8.2374162294494	6.58507982063503	2.4416657338385	2.2356420581227	0.609794841762799	Distal Intergenic	LINC02674
cluster_1	chr10_11798847_11799867	8.15326888934348	1.67327054646638	2.31550569416201	3.10668971950421	0.719729016841495	Distal Intergenic	PROSER2
cluster_1	chr10_118594180_118594868	28.6997139712169	14.4211244523651	9.28909773942245	6.00083527469825	0.865362070236117	Promoter (<=1kb)	PRLHR
cluster_1	chr10_118595574_118597010	15.7396943553563	6.90550802443996	5.62759318839955	8.01235592059838	0.793154105545905	Promoter (<=1kb)	PRLHR
cluster_1	chr10_11936160_11937247	11.7147250717415	1.56096013565794	0.332340057850297	2.03491727205396	0.849884673852546	Exon (ENST00000356352.6/26019, exon 18 of 21)	PROSER2-AS1
cluster_1	chr10_119489504_119490169	12.6563454271089	4.21422695324587	3.01467031011604	2.10369249013043	0.937920602228615	Distal Intergenic	RGS10
cluster_1	chr10_119686523_119688471	19.9113499992536	7.85221493948336	6.10516687159111	6.81568622515099	0.927062618942039	Distal Intergenic	BAG3
cluster_1	chr10_119786117_119786889	13.4727449933536	7.95373226529192	1.12641601855432	2.27748301628544	0.736649050880097	Intron (ENST00000649297.1/22876, intron 4 of 20)	LOC105378513
cluster_1	chr10_119817894_119819215	18.9175712509722	12.1635449785364	10.0220097885358	3.35540195557964	0.624252750676369	Promoter (<=1kb)	INPP5F
cluster_1	chr10_121459401_121460440	7.475805363652	3.6992479935376	0.759740662699338	1.03314845081148	0.827146835991622	Distal Intergenic	FGFR2
cluster_1	chr10_121579554_121581184	23.2738153956766	6.59774645054724	1.79234588583789	2.7627925340367	0.97488741658967	Intron (ENST00000358487.10/2263, intron 2 of 17)	FGFR2
cluster_1	chr10_121668214_121669258	10.4444068066774	3.97796589244953	2.06688325524124	2.79985141694532	0.953376713857205	Distal Intergenic	FGFR2
cluster_1	chr10_121890989_121891678	43.0742353302144	1.52654704130007	1.45945229882069	1.56514071176776	0.855024283459015	Intron (ENST00000693411.1/11101, intron 7 of 11)	ATE1
cluster_1	chr10_121900270_121901192	6.64833721630921	1.75366343618193	1.70657264769528	4.09169598720604	0.575900446247857	Intron (ENST00000693411.1/11101, intron 6 of 11)	ATE1
cluster_1	chr10_122062941_122063658	8.37153277119178	5.0269967977417	1.23186528873054	3.147487718995	0.727743730769249	Intron (ENST00000369005.6/10579, intron 3 of 22)	TACC2
cluster_1	chr10_122258297_122259471	6.63024593369431	2.60452869327025	1.90531674852765	1.14442157998697	0.907590936548553	Distal Intergenic	TACC2
cluster_1	chr10_122342212_122342977	15.3622782117341	4.1227501539208	1.0311274715228	3.0271490512362	0.913014947746056	Distal Intergenic	BTBD16
cluster_1	chr10_122875785_122876769	12.1409780721099	10.9707351642493	1.62468328061911	1.69459993839159	0.522579790155777	Promoter (2-3kb)	FAM24B
cluster_1	chr10_123117571_123118483	12.4060731108088	4.61340549753992	2.207177023269	2.90877975952416	0.964252748654144	Distal Intergenic	HMX3
cluster_1	chr10_123132965_123133446	17.8012821911322	14.3520486186468	6.38166928719656	7.53274286038197	0.63182595864339	Promoter (2-3kb)	HMX3
cluster_1	chr10_123135330_123136058	17.0857364885634	9.41811609408754	6.56252559548802	2.4132458461692	0.740735888870761	Promoter (<=1kb)	HMX3
cluster_1	chr10_123139499_123140009	12.7080879691682	12.0567340298795	3.57911138199983	3.66381650766029	0.505063213201835	Downstream (<=300bp)	HMX3
cluster_1	chr10_123147816_123148200	28.1221597327974	13.2534167252821	2.51084311023411	3.03327060196146	0.838884538207458	Promoter (<=1kb)	HMX2
cluster_1	chr10_123150915_123151798	30.5234178197816	11.0384076440384	3.83920166769909	4.30673656910291	0.95940074985739	Promoter (2-3kb)	BUB3
cluster_1	chr10_123459163_123460221	13.4697986040794	2.40998320551928	2.90034394001075	3.29063039138836	0.807023827634969	Intron (ENST00000448347.5/105378531, intron 4 of 4)	LINC02641
cluster_1	chr10_123890853_123892179	11.3492087044342	5.40503238241989	3.0015249735971	1.95724753353504	0.878833577889879	Promoter (<=1kb)	CPXM2
cluster_1	chr10_123972482_123973372	10.5732627801709	2.89961069107664	3.57584587899791	5.78407833395481	0.631008119362479	Distal Intergenic	CPXM2
cluster_1	chr10_124010652_124011364	26.1857375044154	8.24345363792632	5.45663890044551	2.12501003501809	0.908022466763471	Intron (ENST00000346248.7/51363, intron 7 of 7)	CHST15
cluster_1	chr10_124066660_124067391	10.6566623752069	6.54462745614568	2.63798299034457	3.83043243761972	0.788234253218151	Intron (ENST00000346248.7/51363, intron 1 of 7)	CHST15
cluster_1	chr10_124152744_124153547	9.06928475848852	4.99611764688975	2.16824162051009	2.9495239669232	0.853895318234855	Distal Intergenic	CHST15
cluster_1	chr10_124403409_124404007	14.5442653317746	5.75880133699695	3.31982755170873	5.28358385715496	0.884174061069769	Promoter (<=1kb)	OAT
cluster_1	chr10_124449809_124450490	23.141928962735	7.64255404469971	5.37272705483549	10.2363958996331	0.763417383852548	Promoter (<=1kb)	NKX1-2
cluster_1	chr10_124469702_124470629	39.6481894031163	8.90248055089267	2.77805443413701	2.01398920477147	0.971187595903101	Intron (ENST00000368842.10/64077, intron 1 of 6)	LHPP
cluster_1	chr10_124565471_124566199	15.3614216232781	9.00767714800267	1.39660520436166	2.14990047677526	0.739554118454844	Intron (ENST00000368842.10/64077, intron 6 of 6)	LHPP
cluster_1	chr10_124612452_124613312	11.7843695590983	3.0206076326271	4.33887261929469	2.39698474129351	0.774393283898175	Promoter (<=1kb)	LHPP
cluster_1	chr10_125047997_125048861	18.2360509042357	7.70074515755681	5.60948415011992	5.33076032517394	0.970870550078471	Intron (ENST00000337195.9/1488, intron 2 of 10)	MIR4296
cluster_1	chr10_125134987_125135861	13.4934912727993	2.14292739101577	1.4380317863765	2.69303668662595	0.847408014549473	Promoter (2-3kb)	CTBP2
cluster_1	chr10_125151598_125152507	46.3440296700049	7.29555098271369	1.78231484670285	1.10295803211756	0.948369370292635	Intron (ENST00000337195.9/1488, intron 1 of 10)	CTBP2
cluster_1	chr10_125934248_125934953	8.87216283955648	3.85009976030741	2.72477221300692	2.97365504531833	0.966950026854064	Intron (ENST00000368693.6/92565, intron 1 of 10)	FANK1
cluster_1	chr10_126881742_126882662	12.037157604601	6.38473350203795	1.71725199729224	1.05741073909141	0.786458843034822	Distal Intergenic	DOCK1
cluster_1	chr10_127194776_127197248	13.5737162057214	8.25053399102539	4.80207337709797	6.62306842734585	0.835512550488033	Promoter (<=1kb)	INSYN2A
cluster_1	chr10_127735901_127737829	14.9157645439618	5.95724743823834	2.43935210374281	2.18371637817601	0.939248559995891	Promoter (<=1kb)	FOXI2
cluster_1	chr10_12774250_12775063	8.00108224476206	3.5942341227263	1.42005641391792	2.20878539333752	0.908507961970413	Intron (ENST00000619168.5/57118, intron 5 of 10)	MIR548Q
cluster_1	chr10_128047037_128047863	17.2018983087069	4.82145557671848	1.58281833685163	1.24324682602406	0.976237917735348	Promoter (<=1kb)	PTPRE
cluster_1	chr10_129888921_129889620	12.2542288192995	5.07355576321155	3.74466800899448	1.85491369124899	0.870559446440702	Intron (ENST00000440978.2/253738, intron 6 of 16)	EBF3-AS1
cluster_1	chr10_1309594_1310891	26.4502381835313	3.19717396679882	0.9886045614665	1.12873556869147	0.917526056385785	Intron (ENST00000381312.6/105, intron 3 of 9)	ADARB2
cluster_1	chr10_131890855_131891889	10.2591648665328	1.77073150917277	5.03287603412824	4.18927947323581	0.584202985803129	Exon (ENST00000634373.1/ENST00000634373.1, exon 1 of 2)	PPP2R2D
cluster_1	chr10_132001146_132001958	15.995931019569	2.12276371255491	0.367465065824116	1.2355538221973	0.914783601319618	Distal Intergenic	BNIP3
cluster_1	chr10_132006912_132007781	14.5243300830122	1.41546261722321	1.15361630463875	1.36177274059017	0.863583596085705	Distal Intergenic	BNIP3
cluster_1	chr10_132037266_132038048	13.6094435069797	5.76760224451008	2.65180185782892	5.2920431552018	0.83938472641837	Promoter (<=1kb)	JAKMIP3
cluster_1	chr10_132163061_132163938	22.8622454168192	6.16847571874029	2.80659287207476	5.98515362269227	0.877469076917133	Promoter (1-2kb)	JAKMIP3
cluster_1	chr10_132335197_132335822	35.772699820352	6.08359851832481	2.76503926687587	3.89472107107701	0.916688264594378	Promoter (<=1kb)	LRRC27
cluster_1	chr10_132388887_132390036	10.5817792013138	5.27752720807476	3.00218607111467	4.2176429484224	0.899741790355706	Distal Intergenic	PWWP2B
cluster_1	chr10_132407816_132408818	21.3933516381031	11.5459345083812	5.39176397888639	3.93025376769114	0.828295458072715	Intron (ENST00000631148.2/170394, intron 2 of 2)	PWWP2B
cluster_1	chr10_132418851_132419782	17.6194387125176	4.59528146774249	4.16677664541403	3.66361450773344	0.888204606073772	Exon (ENST00000428814.1/ENST00000428814.1, exon 1 of 2)	PWWP2B
cluster_1	chr10_132477291_132478000	11.0432546855992	8.29684519589817	3.52078920622782	2.231833703172	0.632949693317197	Distal Intergenic	LINC02870
cluster_1	chr10_132517982_132519468	20.5900158681481	9.45939326242289	4.72965265857201	4.62524913413421	0.932587273041942	Promoter (<=1kb)	LOC107984282
cluster_1	chr10_132571893_132572845	14.1794383353069	6.87987208993338	3.36369245830871	7.55559694339394	0.71919146732687	Intron (ENST00000368594.8/3632, intron 1 of 15)	INPP5A
cluster_1	chr10_13271364_13271997	17.0286652267978	4.6585040935743	1.42408625109845	2.02492409386272	0.975932075995175	Distal Intergenic	PHYH
cluster_1	chr10_132879026_132879832	12.863288537516	1.19781763040368	3.46135325265179	3.31588115271209	0.705870350016744	Promoter (2-3kb)	CFAP46
cluster_1	chr10_132971459_132972617	9.5026136687895	2.94184419994363	1.9948502416366	1.67705387937318	0.950663557712815	Exon (ENST00000461291.2/399829, exon 2 of 3)	LINC01168
cluster_1	chr10_133100831_133101640	25.6405897738721	22.4784244527561	15.8283183834156	9.53207117828781	0.526958851996926	Promoter (<=1kb)	ADGRA1
cluster_1	chr10_133219592_133220318	20.783414344115	5.6219588464254	2.39097705664363	2.27514525846081	0.975433666806759	3' UTR	KNDC1
cluster_1	chr10_133229851_133230788	11.474641883107	7.78944435307587	4.55518015067657	5.28036775100402	0.807013285772524	Promoter (<=1kb)	UTF1
cluster_1	chr10_133236852_133238492	12.7123806698516	7.38060115197903	4.7806445926739	3.83157239586069	0.855765054759358	Promoter (<=1kb)	VENTX
cluster_1	chr10_133246933_133247832	15.8552294104056	7.53719850263402	2.92548299125493	1.95366837509908	0.857185052739277	Promoter (<=1kb)	MIR202
cluster_1	chr10_133257381_133258234	19.7785169120968	5.66619009297018	3.60860028124719	3.20213863075765	0.951486339128841	Exon (ENST00000611956.1/ENST00000611956.1, exon 1 of 1)	ADAM8
cluster_1	chr10_133276367_133277412	18.4749607605468	5.55149576039592	3.95986454547242	4.08532901790788	0.9332147889012	Promoter (<=1kb)	ADAM8
cluster_1	chr10_133357192_133358410	23.2101064344513	12.4122680226904	9.10889575141231	6.07329988162207	0.851272953453061	Promoter (<=1kb)	FUOM
cluster_1	chr10_133422779_133423882	13.3446947170037	2.39508504127287	3.55659236166278	4.51610523557634	0.732600187070608	Promoter (<=1kb)	SPRN
cluster_1	chr10_13349487_13350323	43.1352414206718	6.33125830688867	6.33919552681774	4.07673571342798	0.869767566762483	Promoter (1-2kb)	SEPHS1
cluster_1	chr10_13351344_13351816	35.5144356611894	3.4576243397941	2.90320477589359	3.2260471214422	0.863788276064709	Distal Intergenic	SEPHS1
cluster_1	chr10_13371654_13372376	11.8388103012737	4.42366708811853	5.78691175024347	6.94523666147529	0.635229291427748	Distal Intergenic	LOC105376419
cluster_1	chr10_13808993_13810110	8.7342903047811	3.11386121742549	3.06609597318276	3.88443419575722	0.788251568214219	Intron (ENST00000357447.7/55691, intron 4 of 24)	FRMD4A
cluster_1	chr10_13881846_13882876	24.2492859356272	7.03619515790858	2.01268794000966	1.84695288903413	0.976214892398141	Intron (ENST00000357447.7/55691, intron 2 of 24)	FRMD4A
cluster_1	chr10_13971684_13972381	6.05493855658494	3.86037040216205	1.11240413860407	2.2175908144673	0.723989598249446	Promoter (<=1kb)	FRMD4A
cluster_1	chr10_16242680_16243590	20.2697787555732	3.5037336160697	0.954839535901208	0.968901119024073	0.950789415363297	Distal Intergenic	LINC02654
cluster_1	chr10_16386647_16387521	15.0854385320896	2.17080239788826	1.00613105471913	1.27309902682828	0.909773266308048	Distal Intergenic	PTER
cluster_1	chr10_16436339_16437566	39.6213550967027	13.700738061593	5.16330055512629	3.2374539275685	0.943583604136435	Promoter (<=1kb)	PTER
cluster_1	chr10_16891218_16892341	10.4032915296732	6.05847280147931	2.13701933201567	4.77800501924751	0.736088674710588	Intron (ENST00000377833.10/8029, intron 54 of 66)	CUBN
cluster_1	chr10_17673527_17674144	17.206912119766	5.27188227717383	1.65973986688867	2.22143516676585	0.976579379065218	Intron (ENST00000377524.8/8027, intron 2 of 13)	STAM
cluster_1	chr10_19488551_19489439	21.0528849955888	5.00652948884442	6.21083418072671	3.26060300721302	0.823609164115191	Promoter (<=1kb)	MALRD1
cluster_1	chr10_20954354_20955112	16.5300252316896	5.47298421043726	3.77792276633678	3.15677124320889	0.953360592872938	Intron (ENST00000675700.1/10529, intron 4 of 6)	NEBL
cluster_1	chr10_21161392_21162237	18.4619061558419	5.30773705860922	6.2431983258657	4.08035902367033	0.82742100569268	Intron (ENST00000675700.1/10529, intron 2 of 6)	NEBL
cluster_1	chr10_21278637_21279342	11.6808508601306	9.42265259800553	4.37520310141482	3.96384353838767	0.621265205507496	Intron (ENST00000675702.1/10529, intron 1 of 8)	NEBL
cluster_1	chr10_21281967_21282599	20.927482350814	4.1746215354016	1.48395429215062	1.19731319282001	0.957358592679853	Intron (ENST00000675702.1/10529, intron 1 of 8)	NEBL
cluster_1	chr10_21336392_21337225	8.42547987607979	6.43426542941039	2.21810454324301	1.91751957457736	0.629503991141058	Distal Intergenic	LINC02643
cluster_1	chr10_21473119_21473864	15.1385141647969	2.39416890278744	1.41223032976013	1.32535855507465	0.909846211914669	Distal Intergenic	MIR1915
cluster_1	chr10_21527069_21527559	37.5614544702179	19.9928898832491	15.4441927854445	8.9470708876799	0.815698295583464	Promoter (<=1kb)	SKIDA1
cluster_1	chr10_21751307_21752433	20.7318343207507	3.32270985406014	1.85003905107736	1.51346140246552	0.917400812593669	Distal Intergenic	MLLT10
cluster_1	chr10_2201584_2202750	15.3809510211668	3.37187474238699	1.01418810707487	1.29709141955373	0.965350866344716	Distal Intergenic	LINC02662
cluster_1	chr10_22251678_22253815	8.72231010287369	6.26989199904761	4.66381049120952	3.43251896693136	0.725138400160075	Promoter (<=1kb)	LOC100130992
cluster_1	chr10_22345125_22346011	9.11426434800467	6.55773719422159	5.35046074773663	2.30856242899985	0.591430423735991	Promoter (<=1kb)	SPAG6
cluster_1	chr10_22690638_22691577	11.3199079965955	3.30866509097464	1.43583695113661	1.05346901650748	0.971180965330881	Intron (ENST00000376573.9/5305, intron 1 of 9)	PIP4K2A
cluster_1	chr10_23198827_23199880	12.1085875256548	3.98192323910885	2.73904583466055	1.39184849292765	0.917018738931729	Distal Intergenic	PTF1A
cluster_1	chr10_23280273_23281382	7.18864582327662	1.02311656089811	1.34748715890925	1.97297427228915	0.767554598284022	Intron (ENST00000376501.7/256815, intron 8 of 14)	C10orf67-AS1
cluster_1	chr10_23702818_23703405	20.5512894917067	3.57755443948417	3.46308478312509	4.37661500156331	0.837602276470392	Intron (ENST00000376462.5/56243, intron 1 of 18)	KIAA1217
cluster_1	chr10_24552188_24552873	35.0445372408278	2.12144444177994	1.09225252625531	1.2068336411586	0.876049556712055	Distal Intergenic	KIAA1217
cluster_1	chr10_2477012_2477665	16.8240542397729	11.8755754162504	4.73086570550681	3.17770238940806	0.669168166935724	Intron (ENST00000666064.1/ENST00000666064.1, intron 1 of 1)	LOC105376350
cluster_1	chr10_26438004_26439173	8.89982086311697	3.84377053673587	1.49287378856588	1.50394422582552	0.920250161182726	Promoter (<=1kb)	APBB1IP
cluster_1	chr10_26621978_26622800	13.0076232140344	6.47497436069237	3.08483223465351	2.25486138473523	0.864541054186681	Promoter (<=1kb)	LINC03028
cluster_1	chr10_27258691_27259815	11.9857281239303	9.69627720512567	7.77433402249505	3.90986463331656	0.539999584197123	Promoter (<=1kb)	ODAD2P1
cluster_1	chr10_30359595_30360397	19.9794492898764	10.2677202439335	4.78844060504248	4.5751871140965	0.879352745668758	Intron (ENST00000488290.5/55149, intron 9 of 16)	MIR7162
cluster_1	chr10_30374082_30374821	9.27226671605834	2.77022034303946	2.02171790717624	1.19142333394303	0.924138703164442	Promoter (<=1kb)	MTPAP
cluster_1	chr10_30422920_30424262	9.44761696653076	3.88913231317726	2.91599279067522	3.18612332375679	0.947323426820517	Distal Intergenic	MAP3K8
cluster_1	chr10_31036273_31036765	23.2364217509536	4.8105188403248	3.87774925864022	3.28601491202344	0.898578965588775	Intron (ENST00000658872.1/105376481, intron 1 of 2)	LOC105376481
cluster_1	chr10_31754912_31755409	17.2237953551997	6.25828795981367	0.997721027172605	3.94409227320549	0.879506666122328	Distal Intergenic	MACORIS
cluster_1	chr10_32139078_32139980	15.4387028665885	4.74610211575745	2.3480600425439	3.60100500865329	0.933626687129902	Distal Intergenic	KIF5B
cluster_1	chr10_32266856_32267471	18.9653375880114	2.70419187764811	2.21174558723089	0.816220105370537	0.891306699110417	Exon (ENST00000628416.1/ENST00000628416.1, exon 2 of 4)	EPC1
cluster_1	chr10_34426941_34428051	27.7579202886296	23.5315215295821	4.30529846780186	0.938273944498769	0.543107964153018	Promoter (<=1kb)	PARD3
cluster_1	chr10_34905559_34906481	11.1636740947153	9.58828832694957	2.95769562253981	2.07016540448974	0.552202548559597	Distal Intergenic	LINC02635
cluster_1	chr10_35593923_35595068	11.8313152192267	1.18867323425225	2.00888623478205	2.0683338723721	0.793559977236629	Distal Intergenic	GJD4
cluster_1	chr10_3668344_3669093	18.3979667463645	7.94659417538569	1.84398602670379	1.03171308670052	0.859275316164174	Distal Intergenic	LOC105376363
cluster_1	chr10_3887890_3888515	13.7302231037943	8.72988436557521	0.234212023654829	2.36298800698865	0.67896879268541	Distal Intergenic	LINC02660
cluster_1	chr10_42816417_42817291	12.466132891214	1.98961429130783	3.41942296297874	1.84945828830143	0.783541610350088	Exon (ENST00000374518.6/9790, exon 14 of 23)	BMS1
cluster_1	chr10_42932648_42934376	13.5091774940463	9.06021858984912	9.05916119542857	4.90734769924688	0.618397742863983	Distal Intergenic	LINC01264
cluster_1	chr10_42951494_42952727	21.7546806379887	7.63458938297176	5.16156811044221	2.97362876036317	0.924061864701456	Distal Intergenic	LINC01264
cluster_1	chr10_43026091_43027135	10.6578778007475	3.59337305593276	4.44793729934507	2.36924210901018	0.780759920693006	Distal Intergenic	MIR5100
cluster_1	chr10_43202217_43203384	34.9935735419188	7.69322018001348	4.06498675534223	3.40189095958053	0.945013977754922	Promoter (<=1kb)	RASGEF1A
cluster_1	chr10_43203427_43204207	20.3461062747816	7.61516402292032	4.65276474552695	3.87862935394403	0.966648281093665	Promoter (<=1kb)	RASGEF1A
cluster_1	chr10_43362021_43362948	31.4174242618771	14.3987766234619	17.1771394011878	11.4559316133745	0.751062992705013	Distal Intergenic	FXYD4
cluster_1	chr10_43401635_43402058	18.9729224379294	4.41017122815892	2.51106340990849	1.48216732661704	0.942788751469694	Intron (ENST00000357065.8/3185, intron 1 of 3)	HNRNPF
cluster_1	chr10_436247_437588	44.3448808166628	1.20659975945666	1.64270160103403	2.09118385656679	0.843479958549113	Exon (ENST00000425723.2/ENST00000425723.2, exon 1 of 2)	DIP2C
cluster_1	chr10_44316297_44317118	20.1528136362648	2.6627137293148	3.54536966309148	1.48441509536749	0.84107405010822	Distal Intergenic	CXCL12
cluster_1	chr10_44370455_44371407	27.6758475632049	2.97035370030463	3.51404466712623	5.51586419083028	0.80219249724805	3' UTR	CXCL12
cluster_1	chr10_44382170_44382857	15.8163657643064	4.38368845213481	3.10954021382733	3.95321765114733	0.900080884049782	Promoter (2-3kb)	CXCL12
cluster_1	chr10_46540983_46541676	22.8767655081027	12.3410070701737	12.1951777913047	4.31459000181235	0.667327198237844	Distal Intergenic	GPRIN2
cluster_1	chr10_46555403_46557753	30.3355226394095	17.2850504705092	22.2237052731319	10.6848887160895	0.561242158318515	Promoter (<=1kb)	GPRIN2
cluster_1	chr10_4825870_4826956	20.3741109232521	10.5837126535204	13.0294683561136	5.82833157902227	0.623019165193929	Promoter (<=1kb)	AKR1E2
cluster_1	chr10_48523130_48524686	12.3260151480404	9.05242310393477	7.70248309120753	4.49786134498057	0.627159915829912	Promoter (<=1kb)	ARHGAP22
cluster_1	chr10_48533954_48534532	11.8064083087665	5.4068823590029	1.83932014328597	3.08295448533288	0.88997524313878	Intron (ENST00000374172.5/58504, intron 2 of 8)	ARHGAP22
cluster_1	chr10_49689906_49690794	13.0043815634391	2.90064728167588	1.78803282511658	1.59570435811765	0.93225088114602	Intron (ENST00000374113.3/282966, intron 1 of 1)	C10orf53
cluster_1	chr10_50470379_50471482	6.62998508389412	3.8734492588026	1.11756883348853	2.49600045298617	0.754166743304583	Intron (ENST00000429490.5/259230, intron 3 of 9)	SGMS1
cluster_1	chr10_51083212_51083970	15.7605482274885	2.64375789065807	2.28446633277224	1.99406062045526	0.880857900414777	Intron (ENST00000401604.8/5592, intron 1 of 17)	PRKG1
cluster_1	chr10_51267913_51268873	21.0993958246141	1.86706746020813	2.2155958402813	1.63728120859234	0.85055846732991	Intron (ENST00000401604.8/5592, intron 2 of 17)	MIR605
cluster_1	chr10_52018687_52019630	10.2114721252265	8.89031603707665	3.10593818560743	1.92974798848663	0.543347103682458	Intron (ENST00000401604.8/5592, intron 5 of 17)	PRKG1
cluster_1	chr10_52038962_52039877	22.8070730058502	1.25944335656383	1.09821418836047	2.57606035496684	0.830927082712325	Exon (ENST00000691193.1/ENST00000691193.1, exon 1 of 3)	PRKG1
cluster_1	chr10_52040521_52041128	26.5053442725199	1.29215356892739	0.707607059388129	1.59605938301961	0.858119355713118	Intron (ENST00000401604.8/5592, intron 5 of 17)	PRKG1
cluster_1	chr10_5293880_5294596	22.6241314271779	3.67960741543878	4.31572956053432	2.23397858358855	0.851902848271261	Distal Intergenic	LINC02561
cluster_1	chr10_52965861_52966535	16.7392335420011	5.86858629387641	7.5139281552404	3.63487113152363	0.752095912340135	Distal Intergenic	LINC02672
cluster_1	chr10_5466123_5467110	18.0072843432523	7.90400039218064	3.72465981653053	3.49346747461321	0.933227854901181	Distal Intergenic	NET1
cluster_1	chr10_5476496_5477825	6.7318788947561	2.9100564143152	2.25652283347775	1.12512906193698	0.854283618742058	Distal Intergenic	CALML5
cluster_1	chr10_5658898_5660105	9.41225539623996	6.17144881220051	3.91014624102886	3.03180685990944	0.77866645104484	Intron (ENST00000357700.11/79754, intron 1 of 5)	ASB13
cluster_1	chr10_57222193_57223068	31.6661032210957	7.57816879539868	6.21531631155642	3.172048725669	0.9019497303159	Exon (ENST00000690550.1/ENST00000690550.1, exon 1 of 3)	MIR3924
cluster_1	chr10_58229732_58230464	14.161450191464	5.94484611326066	3.63886926504347	1.3736512992227	0.857251373488787	Intron (ENST00000373935.4/253430, intron 2 of 5)	IPMK
cluster_1	chr10_58963544_58964364	28.2169845283161	9.54042740037909	9.89505746589599	7.81853280092472	0.861328864735955	Distal Intergenic	LOC102724768
cluster_1	chr10_5976590_5978433	14.5507840787474	8.58072176207858	6.52724331192684	5.60129558773579	0.903367011683337	Promoter (<=1kb)	IL15RA
cluster_1	chr10_59847001_59848171	20.58215119795	14.2085743972209	7.74137044086864	4.18034983085483	0.677352853185473	Intron (ENST00000263102.7/8030, intron 2 of 8)	CCDC6
cluster_1	chr10_60338007_60339121	4.3708027893986	0.686004621249922	1.60608027286043	1.92305970184781	0.618914077216956	Intron (ENST00000280772.7/288, intron 1 of 43)	ANK3
cluster_1	chr10_60732791_60733762	19.5880490191193	10.9543486430406	7.83012390269432	5.6222867840614	0.853503139251939	Promoter (<=1kb)	NA
cluster_1	chr10_6086345_6086781	18.0711902816544	3.24561849165405	3.01444568346984	12.2953267356635	0.50855017214496	Promoter (2-3kb)	RBM17
cluster_1	chr10_6108524_6109284	18.2866698845942	2.98024816817727	1.45450187177937	3.51739886511782	0.857788240287205	Promoter (<=1kb)	RBM17
cluster_1	chr10_61452162_61453819	18.3926143766721	7.28723599276314	9.01796111440974	6.21188203457702	0.768468634909758	Promoter (<=1kb)	TMEM26-AS1
cluster_1	chr10_6151070_6151951	18.2936150620665	4.85620752099477	2.62155561540061	3.20582140385748	0.945059963512621	Promoter (<=1kb)	MIR3155A
cluster_1	chr10_61985963_61987315	8.08808975871371	1.47542131233886	2.09096607911055	3.37228722080216	0.683274754431499	Intron (ENST00000644638.1/84159, intron 3 of 4)	ARID5B
cluster_1	chr10_62924215_62924923	22.4638765538465	3.7252421923976	3.21362911674856	2.33612575347511	0.885934038825482	Distal Intergenic	LOC107984012
cluster_1	chr10_63504050_63504826	10.7610261497616	7.42884184444397	2.09354555555822	1.71549869334637	0.67136587569937	Intron (ENST00000633035.1/221037, intron 1 of 3)	REEP3
cluster_1	chr10_63514836_63515797	15.4615569288083	1.98923262870472	0.872366955462786	1.75550184265552	0.885850463903347	Intron (ENST00000633035.1/221037, intron 1 of 3)	REEP3
cluster_1	chr10_6364914_6366290	4.44152112422621	2.60594727182357	1.09966554868493	1.40779928562154	0.820898784805364	Distal Intergenic	LINC02656
cluster_1	chr10_63713042_63714042	33.5061934674484	4.88001914881101	12.1344160785698	16.8622082391385	0.578491705651485	Intron (ENST00000444770.1/ENST00000444770.1, intron 2 of 2)	LOC101929846
cluster_1	chr10_64041133_64041997	7.92983139300097	4.49217724286823	3.7704860568165	1.97389982649602	0.754159031041413	Intron (ENST00000654191.1/ENST00000654191.1, intron 2 of 5)	LOC105378333
cluster_1	chr10_65570173_65571139	16.0539817409917	9.16311742181098	10.8236265522049	5.96706760479501	0.632372566056814	Promoter (<=1kb)	LINC01515
cluster_1	chr10_6647723_6648369	13.4991743030369	4.59374203515351	2.94552069509981	3.79760398214737	0.929191972634448	Distal Intergenic	LINC02648
cluster_1	chr10_67230541_67231531	17.0181177192146	8.09925923708798	7.64918527359752	3.26485927633724	0.758973782952157	Intron (ENST00000683963.1/29119, intron 4 of 16)	CTNNA3
cluster_1	chr10_67861442_67862592	21.4851309368376	2.18600771213465	2.3719976788438	2.22566135069676	0.850140323488141	Distal Intergenic	SIRT1
cluster_1	chr10_68563069_68563453	18.9555897026892	11.3237605394636	4.70073351618471	5.65553020323357	0.807564243048111	Promoter (2-3kb)	TET1
cluster_1	chr10_69222151_69223010	11.5633000071289	2.7400980184783	2.74635748961503	2.91556957501019	0.847123769389033	Promoter (1-2kb)	HKDC1
cluster_1	chr10_69329473_69330303	29.6587828857275	3.01423387018189	2.02366804381517	1.79615771458332	0.883916535229943	Intron (ENST00000436817.6/3098, intron 4 of 20)	HK1
cluster_1	chr10_69375420_69376278	21.0218254046337	4.41739324377174	2.12640257435242	2.29999779505898	0.941234632403864	Intron (ENST00000436817.6/3098, intron 10 of 20)	HK1
cluster_1	chr10_69389704_69390507	20.5818757357621	4.59553960167059	2.07583553445213	2.03974324522437	0.954081799444394	Promoter (1-2kb)	HK1
cluster_1	chr10_69392228_69392924	18.8531736130739	9.9915462333042	6.07722143541092	8.06553839228866	0.901136051851395	Promoter (<=1kb)	HK1
cluster_1	chr10_69413221_69413743	17.7093854802314	6.56218067651707	9.86756036752594	10.8890533413972	0.580473716696492	Intron (ENST00000373306.5/6865, intron 2 of 4)	TACR2
cluster_1	chr10_69507638_69508268	21.4445040152982	7.69807688379606	4.36451773293107	3.06927904587849	0.952093190603263	Promoter (1-2kb)	TSPAN15
cluster_1	chr10_69574502_69575211	27.3430414037996	8.64298437806104	3.99902281430618	4.64922366032318	0.977715324564472	Promoter (<=1kb)	LOC101929021
cluster_1	chr10_69801128_69802228	15.0397239982296	8.14375733393444	3.98460187690069	3.79083496932271	0.865083318736881	Promoter (<=1kb)	COL13A1
cluster_1	chr10_69867536_69868429	21.834247733125	7.31735847572444	4.43343889776093	1.4777052882547	0.900453416132648	Exon (ENST00000357811.8/1305, exon 3 of 38)	COL13A1
cluster_1	chr10_70132120_70133144	14.2762002279748	7.95155800418677	5.70547490247603	5.0130921816815	0.920997617292492	Promoter (<=1kb)	AIFM2
cluster_1	chr10_70264989_70265571	15.1582997398839	3.24822578991812	2.24203815149918	1.93548251748572	0.918517847377357	Intron (ENST00000277942.7/64106, intron 2 of 3)	NPFFR1
cluster_1	chr10_70368762_70369574	13.8213880395559	4.42882346215682	1.97757964611649	0.861783726427566	0.938181976764681	Intron (ENST00000395011.5/55222, intron 2 of 3)	LRRC20
cluster_1	chr10_70387265_70387916	20.8934507699499	2.065757491636	3.15902129579143	3.89345589338707	0.794585447310296	Distal Intergenic	LRRC20
cluster_1	chr10_70440751_70441721	13.7648869721953	7.18493701387375	4.95134817080327	6.17818499830398	0.919464392032609	Promoter (<=1kb)	NODAL
cluster_1	chr10_70441876_70442884	31.2863754552229	1.69182973839702	2.4202973365805	1.58479582598384	0.845284716860064	Promoter (<=1kb)	NODAL
cluster_1	chr10_70455188_70455748	35.4736319447537	4.20048644309798	1.6068360627564	1.79081400259647	0.910014774358833	Distal Intergenic	NODAL
cluster_1	chr10_70493610_70494305	16.1088046194196	5.71548093583237	2.96322991496776	2.61833761232527	0.974182646919128	Intron (ENST00000263563.7/27143, intron 1 of 19)	PALD1
cluster_1	chr10_70508815_70509438	10.1485886619586	4.7903604715262	3.14218740692296	2.5419227475913	0.932402675269734	Intron (ENST00000263563.7/27143, intron 1 of 19)	PALD1
cluster_1	chr10_70558981_70559744	11.7669405325162	6.30361683378815	2.80032852903362	3.74794006081217	0.869794226575969	Intron (ENST00000263563.7/27143, intron 18 of 19)	PALD1
cluster_1	chr10_70584793_70585721	13.9933725278536	5.45119799963691	4.05676291548194	7.72857672275619	0.693470871866504	Intron (ENST00000697577.1/27143, intron 19 of 20)	PRF1
cluster_1	chr10_70624192_70624992	23.9580393057799	1.37569287486799	0.859529939276003	1.68743387894872	0.857269556276326	Intron (ENST00000697571.1/27143, intron 20 of 20)	PRF1
cluster_1	chr10_70760867_70761634	10.2507292974352	5.43796928947016	4.48291686896203	2.36265222809325	0.787414167387731	3' UTR	TBATA
cluster_1	chr10_71254101_71254801	11.3553859912076	2.78985004849414	2.67832165261417	2.28486974036419	0.876193857241413	Intron (ENST00000335350.10/219699, intron 1 of 16)	UNC5B-AS1
cluster_1	chr10_71269407_71270691	15.8797254883973	6.0894862591193	3.32601241785945	4.20618137092458	0.96279286818545	Intron (ENST00000335350.10/219699, intron 1 of 16)	SLC29A3
cluster_1	chr10_71278563_71279275	13.0483195194945	2.51170627048901	2.15301692301043	4.38697801976106	0.763949589064396	Intron (ENST00000335350.10/219699, intron 1 of 16)	SLC29A3
cluster_1	chr10_71344207_71345252	23.0496098652279	4.80094757730812	3.08718580318449	2.40602179691991	0.925591769165072	Promoter (2-3kb)	LOC105378353
cluster_1	chr10_71377069_71377785	17.5442729274144	8.48978424404097	4.69780760707773	4.33475034110373	0.926281015270032	Intron (ENST00000644895.1/55315, intron 5 of 5)	CDH23
cluster_1	chr10_71657513_71658710	11.6150109392157	9.39230580067843	4.81086132953912	3.51999201202233	0.608255827011295	Intron (ENST00000224721.12/64072, intron 14 of 69)	CDH23
cluster_1	chr10_71696480_71697139	11.3556305521504	5.59914586023315	3.06484098712985	3.16224001976932	0.932412773097084	Intron (ENST00000224721.12/64072, intron 22 of 69)	CDH23
cluster_1	chr10_71805526_71806490	14.6732254612287	7.16267492701936	3.30686106109859	4.47601513047833	0.908058955366207	3' UTR	CDH23
cluster_1	chr10_72248254_72249220	16.1927848321505	3.2095260812078	2.43310315141197	3.06452912274118	0.878204279828597	Distal Intergenic	DDIT4
cluster_1	chr10_72325350_72325730	21.2305333570772	10.7579533369019	2.53655165225865	3.82348357083386	0.8289506114606	Distal Intergenic	DNAJB12
cluster_1	chr10_72375241_72375967	8.15469563305269	5.39581279099864	2.87459912851783	1.41874650728968	0.692076871917074	3' UTR	DNAJB12
cluster_1	chr10_72886411_72887538	10.111443511299	4.44003337829653	2.59737639930463	3.01579579208535	0.968377253212153	3' UTR	OIT3
cluster_1	chr10_73591173_73592331	19.9996842049278	15.4111956018586	6.17785810286171	6.13150094002472	0.642860910313193	Promoter (<=1kb)	USP54
cluster_1	chr10_73906544_73907307	19.5019265565582	12.9213794685051	2.65942514424175	3.78514227045108	0.691570688155389	Promoter (1-2kb)	PLAU
cluster_1	chr10_73931977_73932897	13.2401392478926	3.26479371027992	0.7824102237887	0.719940713636483	0.980852865544636	Distal Intergenic	C10orf55
cluster_1	chr10_73965726_73967587	35.332733312731	13.532868400182	5.41604799405107	5.99070870329052	0.958704008470696	Distal Intergenic	VCL
cluster_1	chr10_74730125_74731106	8.11801196137273	1.73672594043079	1.78047837905704	1.90139773012567	0.84262082434508	Distal Intergenic	KAT6B
cluster_1	chr10_75043310_75044244	11.0244828492631	2.89704737616859	1.74804444975698	0.995588627237586	0.94216423101127	Exon (ENST00000338487.6/338599, exon 3 of 4)	KAT6B
cluster_1	chr10_75099866_75100923	21.3484292618473	8.52064968974481	6.60098908341349	6.15357930730688	0.953319791246614	Promoter (<=1kb)	SAMD8
cluster_1	chr10_75187756_75188578	13.1247264005536	4.18911300313222	1.19479826953588	1.43780639717667	0.970636046263258	Distal Intergenic	VDAC2
cluster_1	chr10_75233798_75236297	36.3289755484636	14.5267319977587	13.0669897420217	12.5933158511236	0.906947742039971	Promoter (<=1kb)	COMTD1
cluster_1	chr10_75409018_75409909	17.7983876006703	13.7243268717227	7.31546657609592	4.32998313421534	0.619536986132319	Promoter (<=1kb)	LOC101929234
cluster_1	chr10_7541098_7542166	10.6196346125559	3.84832894036034	3.3345804461491	3.16184379348088	0.913256525085385	Distal Intergenic	LOC105376390
cluster_1	chr10_75520975_75521787	7.78535899919082	5.59859857310545	3.01715538175555	1.99725372155021	0.675967066526359	Intron (ENST00000611255.5/83938, intron 2 of 6)	MIR606
cluster_1	chr10_76082714_76083507	25.6339851995023	3.0160825145742	2.21469835003522	2.51917039678185	0.875520518530109	Intron (ENST00000611255.5/83938, intron 5 of 6)	LRMDA
cluster_1	chr10_76103119_76103764	17.1105803943941	2.37272510739252	1.88884819705001	5.0666000082632	0.760743798147346	Intron (ENST00000611255.5/83938, intron 5 of 6)	LRMDA
cluster_1	chr10_77564717_77565973	13.6530656702312	4.31784543838955	0.966940393521014	2.7744067474492	0.91705784297679	Intron (ENST00000639601.1/3778, intron 1 of 27)	KCNMA1
cluster_1	chr10_77709920_77710602	15.9954451009042	4.55503882426539	1.80162163812129	1.3721600347692	0.974331913429983	Distal Intergenic	KCNMA1
cluster_1	chr10_77756236_77757221	10.9705614021059	6.15188143729963	2.65371214574324	2.57123660948149	0.82993568311159	Distal Intergenic	DLG5
cluster_1	chr10_77948933_77949767	18.9751172767771	6.08470844487418	1.47320360338032	2.17901241356908	0.964370292341195	Distal Intergenic	DLG5-AS1
cluster_1	chr10_788986_789847	22.217792945164	9.63203607089843	7.18824417392225	4.48980804552307	0.89506173108805	Distal Intergenic	LARP4B
cluster_1	chr10_79038665_79039322	9.51049857238813	6.62923180439602	2.0252666331624	2.54674113161828	0.687557158882557	Intron (ENST00000456353.5/283050, intron 5 of 9)	ZMIZ1-AS1
cluster_1	chr10_79157259_79158153	17.2919519817783	13.4731520545564	4.07631245662297	5.10472249761502	0.622421683915265	Intron (ENST00000334512.10/57178, intron 3 of 24)	ZMIZ1
cluster_1	chr10_79316902_79318383	8.45040093876981	4.5658255737523	3.16606303429795	4.64295562786408	0.804575372200708	Distal Intergenic	PPIF
cluster_1	chr10_79487346_79488070	15.742216026824	4.59893703168628	3.3355011853563	3.22518567578214	0.932412050826493	Distal Intergenic	LOC729815
cluster_1	chr10_79502330_79503175	9.80548375966485	6.01759036345468	6.34884701568215	2.94261876196976	0.615900426540688	Distal Intergenic	LOC729815
cluster_1	chr10_80132202_80133034	14.1034897003253	10.1182510684469	6.26568479695396	3.9923953653513	0.679641569341931	Promoter (<=1kb)	PLAC9
cluster_1	chr10_80207208_80207694	16.9235057215301	6.19215357690928	0.634139948491338	2.85082451041769	0.896268232410129	Promoter (<=1kb)	LINC00857
cluster_1	chr10_80256592_80257282	16.6696103126781	2.71227277602959	3.04270778936957	3.12500352025601	0.834926776541165	Distal Intergenic	MAT1A
cluster_1	chr10_80265718_80266659	9.89013176209149	3.84804007991	3.63452067089089	2.68044626776821	0.885904022347147	Distal Intergenic	MAT1A
cluster_1	chr10_80289435_80290212	9.8063488885268	1.01611372996256	2.66551429505685	3.86718989260635	0.642474009545376	Promoter (<=1kb)	MAT1A
cluster_1	chr10_8044965_8045555	15.592117726692	6.00867352691309	3.50220259678883	2.33967387898807	0.936869307454175	Promoter (<=1kb)	GATA3
cluster_1	chr10_80535780_80536650	9.69044485467576	2.74463801597284	1.09377977203376	2.28876793421861	0.904659683796047	Promoter (<=1kb)	TSPAN14-AS1
cluster_1	chr10_82149463_82150782	8.43557809952197	2.04990005473476	2.29002460112285	2.73306967396946	0.796125726999659	Intron (ENST00000372141.7/10718, intron 1 of 8)	NRG3-AS1
cluster_1	chr10_8296009_8296874	9.15701165255201	4.49893410922754	2.47716276525826	1.22117531842249	0.833342398654728	Distal Intergenic	LINC00708
cluster_1	chr10_84499757_84500262	14.1351304295922	5.48362395395197	7.24446453172889	3.60005701228426	0.713837476659171	Exon (ENST00000224756.12/54462, exon 10 of 11)	CCSER2
cluster_1	chr10_84540508_84541081	16.8121934251556	6.18667001191788	8.87733212792828	4.79098227453653	0.696695328171883	Distal Intergenic	CCSER2
cluster_1	chr10_85492534_85493350	13.1415834911887	2.73732367007128	3.15508630936941	5.67073512595634	0.692705357152678	Distal Intergenic	LINC01520
cluster_1	chr10_86261876_86262859	8.99282449395053	3.13978584115349	3.41847766709277	2.47979966542555	0.84197812405116	Promoter (1-2kb)	MIR346
cluster_1	chr10_86376843_86377657	19.7228584029168	8.14640329298621	11.0516688014451	5.12109758821657	0.673743856265527	Distal Intergenic	GRID1
cluster_1	chr10_86389376_86390287	23.2403950474919	5.93703452874511	6.34675803136207	2.75676618239932	0.84742466537774	Distal Intergenic	GRID1
cluster_1	chr10_86535252_86535970	15.4907258897332	5.91492555581162	1.85566688266487	2.77282931207218	0.941737589960581	Distal Intergenic	WAPL
cluster_1	chr10_86536176_86537069	10.2848829258365	2.71132432969786	1.70851474024535	1.18577419321906	0.94380042172129	Distal Intergenic	WAPL
cluster_1	chr10_86631779_86632764	18.9370762627233	4.99418700612433	4.80736552258663	2.47183453525567	0.873736797418965	Distal Intergenic	LDB3
cluster_1	chr10_86856996_86857822	14.3401892820108	3.09217722471297	1.30345361568314	3.35380831086029	0.861827400356293	Intron (ENST00000638429.1/657, intron 2 of 13)	BMPR1A
cluster_1	chr10_86864922_86865636	15.9384402253168	4.10933301965203	0.896385477241534	2.06211384875274	0.957148716609509	Intron (ENST00000638429.1/657, intron 2 of 13)	BMPR1A
cluster_1	chr10_86945356_86946421	12.7189537870541	4.50603637052799	4.40442270508452	4.11674686193289	0.873527973838399	Promoter (<=1kb)	MMRN2
cluster_1	chr10_86954053_86954968	23.2256103515546	14.1158599931482	13.4046229834663	8.54044283273586	0.745110289286035	Promoter (<=1kb)	MMRN2
cluster_1	chr10_87625662_87626846	13.2756112751775	2.53926290858405	0.925874763415946	1.27702949342045	0.940821894640162	Intron (ENST00000438082.1/ENST00000438082.1, intron 1 of 3)	PAPSS2
cluster_1	chr10_87734770_87735635	10.6336450220655	7.38831358404863	3.61357742034536	4.66199068019306	0.748392668793343	Intron (ENST00000361175.8/9060, intron 8 of 11)	PAPSS2
cluster_1	chr10_87915269_87915902	13.1757293506506	7.32435248346767	0.623493401780184	1.39797564119984	0.749414917520681	Intron (ENST00000688308.1/5728, intron 3 of 9)	PTEN
cluster_1	chr10_88582481_88583669	25.3355918106847	9.987326943056	13.4607184198533	6.95148164098245	0.702996409662545	Promoter (<=1kb)	RNLS
cluster_1	chr10_88702977_88703751	19.7804604862691	1.36788930360152	0.975989551935294	0.879680462461491	0.871808849749389	Promoter (2-3kb)	LIPK
cluster_1	chr10_88728275_88728935	26.914102069096	1.27180629224638	2.05983648774425	1.940731776688	0.833339661216208	Exon (ENST00000441370.1/ENST00000441370.1, exon 1 of 1)	LIPK
cluster_1	chr10_89535156_89536238	24.9283889610968	13.6534910732341	13.9361162033087	8.52010317576035	0.751750860695326	Promoter (<=1kb)	SLC16A12
cluster_1	chr10_90812676_90813485	21.0433147829472	1.11968670918044	0.520003541124018	0.799206880504857	0.871541529597046	Exon (ENST00000685016.1/ENST00000685016.1, exon 3 of 3)	HTR7
cluster_1	chr10_90925338_90926088	23.2416145635252	0.656376951649256	0.482168487033232	0.142573706328961	0.865087838452524	Distal Intergenic	ANKRD1
cluster_1	chr10_90930055_90931819	11.7961894693371	3.25983424171855	2.17353726581781	3.8449023546288	0.834746110744642	Distal Intergenic	ANKRD1
cluster_1	chr10_91744968_91745692	18.3703731474351	2.19103233984486	1.29483474862864	1.7992812853015	0.882659121044294	Distal Intergenic	TNKS2-DT
cluster_1	chr10_92045450_92046298	12.9633873433866	2.82033090291901	2.57387860788988	3.24071388932941	0.844774250246487	Distal Intergenic	BTAF1
cluster_1	chr10_92305078_92306055	12.1531019005492	1.42072072255968	0.617532967764376	1.43119189350582	0.875270736912064	Promoter (2-3kb)	MARCHF5
cluster_1	chr10_92387108_92387729	11.2780470442311	7.263511839035	4.87166828840761	3.18070481759228	0.754338172327585	Distal Intergenic	MARCHF5
cluster_1	chr10_92688995_92690215	14.6020018393489	8.3596623512612	7.84398289497024	5.27119985200402	0.795441129970328	Promoter (<=1kb)	HHEX
cluster_1	chr10_92691448_92692531	13.7901103932719	6.14800844382937	3.97188770627339	2.13793440627598	0.874024728443889	Promoter (<=1kb)	HHEX
cluster_1	chr10_92695785_92696836	7.8046566607851	4.16026008707158	3.73336018475749	2.30248154636605	0.806851203581037	Downstream (<=300bp)	HHEX
cluster_1	chr10_93062538_93063130	14.8175943379679	10.1093312975496	5.85886891559324	4.21629965473826	0.72712839692323	Promoter (<=1kb)	CYP26A1
cluster_1	chr10_93272704_93273703	33.1421511160758	2.42105687779182	3.346581283536	3.09921849894013	0.834960262626218	Distal Intergenic	MYOF
cluster_1	chr10_93280114_93281685	27.0286038413124	6.90642418075942	6.18245694582097	3.96473008738854	0.89371814370671	Distal Intergenic	MYOF
cluster_1	chr10_93420936_93422155	7.41571732731959	3.65641097856442	1.2284112587258	1.52835522771871	0.867424046305038	Intron (ENST00000359263.9/26509, intron 5 of 53)	MYOF
cluster_1	chr10_93438479_93439320	24.7981122763219	9.41370698304306	4.68868284491918	3.72825431099811	0.954639893803493	Intron (ENST00000359263.9/26509, intron 3 of 53)	MYOF
cluster_1	chr10_93445384_93446264	26.1075366184585	20.2747618006463	12.2492750740493	9.08762768450463	0.650525374325844	Intron (ENST00000359263.9/26509, intron 3 of 53)	MYOF
cluster_1	chr10_93745425_93745907	12.627935489136	4.7093061458583	3.72277001992198	1.82916860016774	0.879543933878019	Distal Intergenic	LGI1
cluster_1	chr10_93749001_93749732	11.8596080124299	4.53660655504396	1.85614735836379	2.16511496535496	0.961995808038759	Distal Intergenic	LGI1
cluster_1	chr10_93841767_93842649	8.36027149975208	3.18369485108676	2.83044233701321	2.01197077126369	0.899243520299466	Distal Intergenic	LGI1
cluster_1	chr10_93999474_94000089	5.57966334213474	2.35485591156278	1.12095528817647	1.92896357494205	0.887686588216036	Intron (ENST00000371380.8/51196, intron 1 of 32)	PLCE1
cluster_1	chr10_95229842_95231699	30.3651268223246	5.51643296271366	7.15267398655212	3.84939271134018	0.831328046502921	Exon (ENST00000451737.1/ENST00000451737.1, exon 1 of 2)	PDLIM1
cluster_1	chr10_95264308_95265039	21.8336569539527	9.39446853351012	1.62437079893729	1.31874501809327	0.858923762892566	Intron (ENST00000329399.7/9124, intron 3 of 6)	PDLIM1
cluster_1	chr10_95755431_95756652	10.0719814264778	4.6743402474195	4.57471219920311	3.49566802392188	0.867910123685827	Promoter (<=1kb)	ENTPD1
cluster_1	chr10_96309653_96310465	26.3834199307948	4.91506218072949	2.82021966487341	1.991538812992	0.927759709309556	Intron (ENST00000630152.1/1791, intron 1 of 10)	DNTT
cluster_1	chr10_96345080_96345929	13.0817694891588	1.77670662863213	0.59722907245219	1.90959395247446	0.872118070731077	3' UTR	OPALIN
cluster_1	chr10_96395804_96396651	10.0325178281794	2.47124566093705	2.88851355180794	5.57253063479608	0.613208034228546	Exon (ENST00000357947.4/7093, exon 12 of 21)	OPALIN
cluster_1	chr10_96509029_96509591	22.619310195014	5.75171824604128	2.85465696005512	3.90283220985333	0.939784785080951	Intron (ENST00000357947.4/7093, intron 1 of 20)	TLL2
cluster_1	chr10_96719796_96721485	16.3828048788512	7.02674913713286	8.73071236647597	5.4478507297042	0.738779985906592	Promoter (<=1kb)	PIK3AP1
cluster_1	chr10_97037262_97038259	15.519191455295	5.90802789762361	5.6314877154404	6.70529122590104	0.823186107210659	Exon (ENST00000266058.9/6585, exon 22 of 37)	NA
cluster_1	chr10_97407125_97407863	21.5646660411108	8.82574111352572	7.93112936194415	8.70735050490937	0.879590492229289	Intron (ENST00000422848.1/ENST00000422848.1, intron 1 of 1)	RRP12
cluster_1	chr10_97418718_97419458	15.369253746811	2.61165537099926	2.3832154383256	1.7837128741787	0.879692640254701	Exon (ENST00000422848.1/ENST00000422848.1, exon 2 of 2)	LOC644215
cluster_1	chr10_97427492_97428056	24.9331303658313	11.6874000842368	7.90125154270891	7.11131926073015	0.960813385799163	Promoter (<=1kb)	PGAM1
cluster_1	chr10_97479831_97480476	30.160410267963	6.79168128122156	3.82822776890017	6.44516832438353	0.888385685183031	Exon (ENST00000422685.5/64210, exon 4 of 10)	MMS19
cluster_1	chr10_97539661_97540253	10.8143796881401	2.68436140502555	1.63547299609949	3.39370687793999	0.821739283218154	Intron (ENST00000370664.4/80019, intron 1 of 2)	ANKRD2
cluster_1	chr10_97553485_97554159	20.2823415275376	8.08293921597977	9.05682527233109	6.26792459970079	0.814829024710802	Intron (ENST00000370664.4/80019, intron 1 of 2)	ANKRD2
cluster_1	chr10_97572104_97572884	11.2708656231922	7.16597743516305	3.77700560339729	4.19899800361894	0.816934914857549	Promoter (<=1kb)	ANKRD2
cluster_1	chr10_97583932_97584517	12.9521193971123	2.34478541153512	4.18646745821489	6.79762288800257	0.594633335875317	Promoter (<=1kb)	HOGA1
cluster_1	chr10_97648447_97649371	7.00971941190653	2.94083978018548	1.11538906062569	4.02378558777493	0.636819387138968	Intron (ENST00000370649.3/55361, intron 2 of 9)	PI4K2A
cluster_1	chr10_97762747_97763531	13.1325971633157	2.87587805243509	1.47776860694347	2.78160782163441	0.884864596883804	Distal Intergenic	ZFYVE27
cluster_1	chr10_97771200_97772415	16.4478441521072	7.25211517111905	5.82268611269425	7.16497879635502	0.883804365448827	Promoter (<=1kb)	SFRP5
cluster_1	chr10_9911327_9912132	19.2455661850407	1.48750156220541	1.16908347517003	0.311561400513441	0.879933185614782	Distal Intergenic	LINC02663
cluster_1	chr10_99232063_99233023	14.7150611181221	9.15658042555241	4.92279452754363	2.59372744749406	0.731954873354463	Promoter (2-3kb)	HPSE2
cluster_1	chr10_99236003_99236653	17.2873290141833	7.43880280476704	3.87154585629402	1.1048675226889	0.842344129771808	Promoter (<=1kb)	HPSE2
cluster_1	chr10_99392508_99393507	7.95057710541056	2.87322011752133	1.9004899018572	3.43834199428978	0.794401147903059	3' UTR	GOT1
cluster_1	chr10_99522832_99523363	13.1780385341604	7.67122198936058	3.14415955416278	1.61803346939021	0.754377482366235	Distal Intergenic	LINC01475
cluster_1	chr11_100753058_100753989	12.2042198594622	6.15958839857383	3.39789593075324	2.1725585710081	0.854459725472426	Intron (ENST00000298815.13/143872, intron 1 of 23)	ARHGAP42
cluster_1	chr11_101127189_101128724	16.9927889191099	8.51916444553666	11.9344930588007	6.06058684815115	0.583087927746829	Promoter (<=1kb)	PGR
cluster_1	chr11_101566886_101567660	10.4014975359578	4.00349978815964	2.50162188077387	1.84062168886083	0.948499991808137	Intron (ENST00000344327.8/7225, intron 1 of 12)	TRPC6
cluster_1	chr11_102268251_102269431	30.7169637395446	8.71216127760476	6.26727206457936	5.84651824030544	0.932816295445493	Distal Intergenic	YAP1
cluster_1	chr11_102374501_102375318	11.8033790764344	7.7323270912363	6.96482718364432	2.69307110696415	0.607272090880901	Intron (ENST00000530675.5/329, intron 6 of 8)	BIRC2
cluster_1	chr11_102390643_102391254	12.7657289320106	4.03943707370764	5.67258580118655	4.86025832836454	0.736411050525785	Distal Intergenic	BIRC2
cluster_1	chr11_102612853_102613820	19.8691079443262	6.78727125474354	2.41809626171099	3.21823699252275	0.969454566262777	Intron (ENST00000542119.1/101928477, intron 1 of 3)	MMP20
cluster_1	chr11_102746519_102747479	10.0908234887799	3.8617552865636	2.90138261463291	1.15499448571124	0.861644795034007	Promoter (<=1kb)	WTAPP1
cluster_1	chr11_102807634_102808414	17.4384525832621	1.73572265569602	1.99860868100084	1.78297931767733	0.846840904452419	Exon (ENST00000546014.1/ENST00000546014.1, exon 1 of 1)	MMP1
cluster_1	chr11_10304465_10305272	39.9550247969108	24.3994645028019	16.8373370549989	10.5002257912911	0.77404082593814	Promoter (<=1kb)	ADM
cluster_1	chr11_10307498_10308339	43.6500884912265	17.4694139568455	18.0854938428029	12.3669763030218	0.844883951001837	Promoter (<=1kb)	CAND1.11
cluster_1	chr11_10351578_10352972	46.8265044563937	31.2167285389094	19.6426767528261	8.01445968666099	0.664481629185473	Intron (ENST00000527261.5/100130460, intron 2 of 2)	CAND1.11
cluster_1	chr11_10366365_10367187	18.192880117551	4.91362548925942	2.25119676087797	3.0544929777618	0.953715122888691	Intron (ENST00000527261.5/100130460, intron 2 of 2)	CAND1.11
cluster_1	chr11_104163395_104164629	30.1638650660539	15.4345356516786	18.8224152454094	10.9797519214091	0.677112374310273	Promoter (<=1kb)	PDGFD
cluster_1	chr11_104254050_104254871	7.72344039209899	4.64944944308902	3.4963820435471	0.811938226906766	0.649212746991356	Distal Intergenic	PDGFD
cluster_1	chr11_10450189_10451456	19.2820421435373	10.1013525300315	7.20310108567058	2.95496480175047	0.772833954478866	Promoter (<=1kb)	AMPD3
cluster_1	chr11_104968984_104969834	10.6058770613341	2.7717865419872	2.71479573819981	1.43523211613724	0.871590351138127	Promoter (<=1kb)	CASP4
cluster_1	chr11_105960016_105960988	19.1332336557659	3.74021844769892	5.91571661792311	2.43268774463181	0.77972439909862	Intron (ENST00000282499.10/2893, intron 14 of 16)	GRIA4
cluster_1	chr11_106956869_106957695	16.8909521851624	2.67755921166275	1.71642532627112	2.41160013510266	0.883439076110051	Intron (ENST00000526355.7/2977, intron 3 of 7)	GUCY1A2
cluster_1	chr11_107396920_107398098	10.3372223756779	2.28713783129829	2.35663981187017	2.89244933503493	0.819814098944856	Intron (ENST00000431778.5/143884, intron 7 of 15)	CWF19L2
cluster_1	chr11_10792205_10793162	21.7205448855899	16.229271315525	8.95176940250725	6.76837816418166	0.671146282639542	3' UTR	EIF4G2
cluster_1	chr11_107999740_108000411	16.1341735028115	3.10434246052051	1.0281195245934	1.79419491371922	0.934962653322348	Distal Intergenic	CUL5
cluster_1	chr11_108788477_108789219	12.2615999513611	5.20202298665818	2.73793469696916	3.54929279066469	0.953040540275333	Intron (ENST00000690021.1/1662, intron 14 of 18)	DDX10
cluster_1	chr11_110208826_110209744	12.8094382491951	9.35664721250271	7.07102130603406	3.67816944708474	0.624614959620912	Intron (ENST00000645527.1/5962, intron 14 of 18)	RDX
cluster_1	chr11_110564617_110565776	11.9961566641103	4.25144748445012	2.08095780891646	2.31711892320758	0.980606162113104	Distal Intergenic	ARHGAP20
cluster_1	chr11_111422871_111423502	10.6739650093043	3.30623480602672	3.85198149579154	2.99968387479643	0.824892555251818	Intron (ENST00000531398.1/5450, intron 1 of 4)	LOC100132078
cluster_1	chr11_111454540_111455557	10.7641422866895	2.98319346811013	3.59939356951285	1.3412401475857	0.801291252985262	Promoter (<=1kb)	BTG4
cluster_1	chr11_11147977_11149087	9.35301550164536	5.25022111908372	1.35781409744174	2.09186083246768	0.790555608623628	Intron (ENST00000647635.1/105376550, intron 2 of 6)	LOC105376548
cluster_1	chr11_111540081_111542188	13.521682515767	8.82084048214524	8.81989289492388	5.13817534378097	0.655923813874301	Promoter (<=1kb)	LAYN
cluster_1	chr11_111918572_111919353	19.0126324007471	6.53645755259065	1.25497189931512	1.1677918723923	0.933766771994467	Promoter (<=1kb)	C11orf52
cluster_1	chr11_11279820_11280526	14.0632040788265	5.28810803275448	3.55545478192246	2.550218671702	0.943795097456638	Intron (ENST00000227756.5/374378, intron 10 of 10)	CSNK2A3
cluster_1	chr11_112822268_112823382	14.699008382678	3.52786400340647	2.64546441676174	4.26585447632918	0.837899356127746	Exon (ENST00000669768.1/105369498, exon 3 of 3)	LOC105369498
cluster_1	chr11_112922338_112923222	9.13686778061364	4.79483120915724	4.05847663117268	2.1958334821409	0.792479348402153	Distal Intergenic	NCAM1
cluster_1	chr11_113387048_113388221	10.897749115649	5.50741860216853	1.8816021710278	1.86631296345858	0.848066977055915	Promoter (<=1kb)	ANKK1
cluster_1	chr11_113628694_113629556	21.4649462631985	6.16266093900167	2.38379017134857	1.93878488931871	0.976597162778129	Distal Intergenic	TMPRSS5
cluster_1	chr11_113849539_113850498	26.2290989821719	1.60823761783657	0.586469604107946	0.802194911843688	0.881429280041172	Intron (ENST00000003302.8/57646, intron 3 of 24)	USP28
cluster_1	chr11_113974768_113975732	20.7897279220368	7.1651974094257	3.37092161079607	9.40717348795742	0.736734514163417	Promoter (<=1kb)	HTR3A
cluster_1	chr11_115226443_115227141	16.2110336714058	8.06298518890259	2.22412218230792	3.57279293473918	0.848756353196789	Intron (ENST00000331581.11/23705, intron 5 of 11)	CADM1
cluster_1	chr11_115527684_115528616	10.0672851741499	5.34665867557437	0.81051736955612	0.619491631983591	0.769520910790192	Distal Intergenic	CADM1
cluster_1	chr11_115548650_115549520	12.4569658432953	4.42603347585412	1.39281275051659	1.98665344622644	0.957337566464398	Distal Intergenic	CADM1
cluster_1	chr11_116687366_116689084	14.2862594407369	3.39650965552503	1.72213808319159	2.4017158753848	0.930318323207122	Distal Intergenic	LINC02702
cluster_1	chr11_116696282_116697177	11.4571419491813	1.99589009506421	3.30380153593705	3.91557596418516	0.718167758063047	Distal Intergenic	LINC02702
cluster_1	chr11_116732047_116733165	16.2704877703091	6.09641436776232	6.15175910586975	6.55277281911577	0.835078344770922	Distal Intergenic	BUD13
cluster_1	chr11_117181250_117181622	24.6671297113844	4.50400134311864	2.98784245925999	3.61525578020594	0.896097926704113	Promoter (<=1kb)	SIDT2
cluster_1	chr11_117197639_117198369	19.7510260645183	3.61667358394215	2.66164460063888	2.29000721969805	0.902269891333747	Promoter (1-2kb)	TAGLN
cluster_1	chr11_117198891_117199927	27.5117407930405	9.43054173724895	5.75000000772871	2.07520509509962	0.900503819484377	Promoter (<=1kb)	TAGLN
cluster_1	chr11_117861089_117861971	21.3267322916649	8.04920733704747	2.1056399520412	6.83704229663262	0.834781869844356	Intron (ENST00000532984.1/100533181, intron 1 of 9)	FXYD6
cluster_1	chr11_117928532_117929713	5.30146142763657	4.44818255608673	0.768799311402153	1.65390011730589	0.562427176790235	Promoter (<=1kb)	TMPRSS13
cluster_1	chr11_118210707_118211512	13.0828544383813	4.84995371835074	1.58661105246864	1.76349045184443	0.949492376401045	Promoter (<=1kb)	JAML
cluster_1	chr11_118251838_118252614	11.8595669672507	8.15831483479618	4.052766295573	7.40244807834602	0.654343519762136	Promoter (<=1kb)	MPZL3
cluster_1	chr11_118263988_118264749	9.93443507582469	8.02886041464779	1.38197418051811	1.48521948541637	0.578894759419719	Promoter (<=1kb)	MPZL2
cluster_1	chr11_118315373_118316324	9.60195041675454	3.3803040874226	1.58152620793304	3.54334775974597	0.826161281690103	3' UTR	CD3E
cluster_1	chr11_118316443_118317182	10.5278899371155	4.66983418943809	2.04440483710065	5.92119544028624	0.663876034813464	Downstream (<=300bp)	CD3E
cluster_1	chr11_118610904_118611363	36.0898163325579	16.6482849442741	4.55289496981922	3.83215518427676	0.857077339467836	Promoter (<=1kb)	PHLDB1
cluster_1	chr11_118615248_118615736	39.3977948005294	11.2841978648251	2.90677900450347	2.50007586528024	0.973685533024285	Promoter (<=1kb)	PHLDB1
cluster_1	chr11_118634278_118636001	25.8031404074549	12.1640701102948	6.32708145104661	9.32881918913675	0.903885781316769	Promoter (<=1kb)	PHLDB1
cluster_1	chr11_118659167_118660147	26.0687068808111	17.0870180459401	9.71064571092825	9.23514826095231	0.798883040970098	3' UTR	PHLDB1
cluster_1	chr11_118715613_118716297	29.8596700316599	6.91815214306787	1.59060732612542	1.49420307700204	0.979376765527263	Intron (ENST00000526274.2/105369519, intron 2 of 2)	LOC105369519
cluster_1	chr11_118719660_118720406	8.34998815279831	4.36371290731658	1.84216252636672	1.36731608948775	0.83412285312616	Intron (ENST00000526274.2/105369519, intron 2 of 2)	LOC105369519
cluster_1	chr11_118911734_118912769	41.9505370189244	23.0824167726014	7.04214348452293	12.4385369037745	0.809037900494552	Promoter (<=1kb)	BCL9L
cluster_1	chr11_118918093_118918770	15.9843968644239	10.3382819911186	5.55325969931804	5.38316230571587	0.796187405368696	Intron (ENST00000683865.1/283149, intron 2 of 9)	UPK2
cluster_1	chr11_118921252_118921610	14.9759505484777	10.3585158024346	4.69571493605762	3.61199531055675	0.701289924254255	Intron (ENST00000683865.1/283149, intron 1 of 9)	UPK2
cluster_1	chr11_118930052_118930631	42.6581584473435	15.5737451005625	5.40943901019135	13.7798528188569	0.852331505833323	Intron (ENST00000534788.1/7379, intron 1 of 5)	BCL9L
cluster_1	chr11_119168538_119169761	29.2146248002871	15.2091224426425	4.47619188804448	6.12415554266368	0.833836422224026	Promoter (<=1kb)	NLRX1
cluster_1	chr11_119195601_119196136	25.791088244705	3.43875985377401	0.538434365403998	1.2731946794323	0.929377325733782	Promoter (<=1kb)	CCDC153
cluster_1	chr11_119196751_119197353	12.5695863193916	4.86886241973762	3.53010194490882	8.8316716558778	0.550159545664677	Promoter (<=1kb)	CCDC153
cluster_1	chr11_119315057_119315813	20.3937605923447	9.64106033820383	4.72050060335031	8.72330528908115	0.82706045891159	Promoter (<=1kb)	MCAM
cluster_1	chr11_119337728_119338653	33.0902461075377	18.9065075851723	10.966999147322	11.5904120418258	0.892688846050206	Promoter (1-2kb)	C1QTNF5
cluster_1	chr11_119416663_119417703	23.9990040686316	1.76867599592212	1.45630890935817	1.49973745297673	0.864287829698974	3' UTR	THY1
cluster_1	chr11_119590652_119591444	10.9763626113166	2.68920712899451	1.65666101242775	6.22241588449807	0.600144307734931	Distal Intergenic	LOC105369520
cluster_1	chr11_119726403_119726954	21.4216039550978	12.084970984398	5.28714482033634	5.9862666519889	0.841707076101422	Promoter (1-2kb)	NECTIN1
cluster_1	chr11_119964279_119965343	9.53153024815208	7.87171455495845	1.33545204943626	1.60925527312073	0.569190387688108	Distal Intergenic	LINC02744
cluster_1	chr11_120013203_120013916	23.7421205266223	11.2984637218551	4.50760300936556	6.08112120183541	0.901269968421844	Exon (ENST00000667462.1/ENST00000667462.1, exon 1 of 4)	LOC105369527
cluster_1	chr11_120057584_120058636	20.379063571941	8.6559154118817	6.70114672025217	7.35178298492253	0.940261364820622	Distal Intergenic	LOC105369527
cluster_1	chr11_120197302_120197956	11.4785295313249	5.66474438845423	3.07613980844717	2.38163090303734	0.88964197777411	Distal Intergenic	OAF
cluster_1	chr11_120239721_120240621	11.7056996077117	6.38134318069978	2.94891976445915	4.11105813768078	0.864284253426749	Promoter (<=1kb)	POU2F3
cluster_1	chr11_1202906_1203557	14.6252906058627	3.62245990327226	8.28723048747363	6.35579778159798	0.574449769151932	Distal Intergenic	MUC5B
cluster_1	chr11_120306373_120307100	11.2680430819819	1.72863337287703	1.17713811632096	2.88300047530897	0.80199215162706	Promoter (<=1kb)	POU2F3
cluster_1	chr11_120316834_120317548	10.8284185470641	3.70334448382543	1.83015675109344	2.29681189055098	0.970284513604753	Promoter (<=1kb)	POU2F3
cluster_1	chr11_120527048_120527960	29.0007559804449	5.04211718057473	5.38419173543313	4.99609809555108	0.849425758393023	Intron (ENST00000638419.1/2900, intron 1 of 20)	GRIK4
cluster_1	chr11_120546400_120547191	8.79918600160767	2.33455123549781	3.16010169699766	4.91753750331632	0.612747963584104	Intron (ENST00000638419.1/2900, intron 1 of 20)	GRIK4
cluster_1	chr11_120555024_120555796	13.0135754881481	2.85756619445608	5.3317066624708	5.83167568081273	0.640287380754421	Intron (ENST00000638419.1/2900, intron 1 of 20)	GRIK4
cluster_1	chr11_120569664_120570266	7.39148715754536	2.19663574612128	1.06925575018269	4.58346105333594	0.574237696086158	Intron (ENST00000638419.1/2900, intron 1 of 20)	GRIK4
cluster_1	chr11_120776070_120776825	9.58549461782893	3.77302623181399	1.61273257853057	2.1646925568745	0.955405427826163	Intron (ENST00000638419.1/2900, intron 3 of 20)	GRIK4
cluster_1	chr11_121245991_121246934	8.86053973058811	4.51999424598767	3.29859355199657	1.92378512853299	0.83780093552911	Distal Intergenic	SC5D
cluster_1	chr11_121372545_121373508	12.2677547738427	1.05989147995304	0.73806647399473	1.35855542866136	0.853045838792826	Distal Intergenic	SC5D
cluster_1	chr11_121406127_121406955	31.3252711288514	2.08375982960984	1.03927487654102	0.803024142653461	0.882777931208586	Distal Intergenic	SORL1
cluster_1	chr11_121479043_121480202	18.1965736414921	5.80043570327678	1.84554098555757	2.05031846521083	0.974125432061673	Intron (ENST00000260197.12/6653, intron 3 of 47)	SORL1-AS1
cluster_1	chr11_121687902_121688549	9.38718563999741	4.56220449536002	1.73768894441887	2.72321514638955	0.881269043437413	Intron (ENST00000652518.1/107984402, intron 1 of 6)	LOC107984402
cluster_1	chr11_121800423_121801592	18.7408166318297	6.81352610100761	2.83013637172365	3.6002409616851	0.968912294813628	Intron (ENST00000652518.1/107984402, intron 1 of 6)	LOC107984402
cluster_1	chr11_122202469_122203472	9.46891346033838	5.72819064161168	3.1761971019858	3.65704741472595	0.858625134197	Promoter (<=1kb)	MIR100HG
cluster_1	chr11_122976866_122977826	15.902337004752	6.26758758313177	3.28891750700876	1.66084572891429	0.904637441700503	3' UTR	BSX
cluster_1	chr11_122981632_122982156	20.3760340599421	16.4351660190988	5.15953434705136	5.89310122901394	0.602195318717071	Promoter (<=1kb)	BSX
cluster_1	chr11_122984168_122985059	15.9471476243391	8.27365903213995	3.29464152698927	2.43215925792159	0.831359601823152	Promoter (2-3kb)	BSX
cluster_1	chr11_123165967_123166684	9.94781321568621	4.52500810978964	2.08453257227379	2.14882699273501	0.927798732143383	Intron (ENST00000448775.4/79827, intron 1 of 6)	CLMP
cluster_1	chr11_123194304_123196582	16.2502564901083	8.47260690532524	4.46268010917586	4.48940150765542	0.901860112952899	Promoter (<=1kb)	CLMP
cluster_1	chr11_123494381_123495134	7.0835015986325	3.20978313128473	1.06085285287925	3.19019718538852	0.745481085784469	Promoter (2-3kb)	GRAMD1B
cluster_1	chr11_123742316_123743099	20.4461495069436	2.46886039234863	2.98929927908272	4.35827206066155	0.799383114929173	Promoter (<=1kb)	ZNF202
cluster_1	chr11_123775113_123776387	18.4311158103003	0.799978966968251	0.849694841060941	1.15558376311618	0.846268476030835	Distal Intergenic	OR6X1
cluster_1	chr11_12409981_12410632	8.2948156293589	2.53004903243171	2.55362805092231	2.18618992676526	0.867464254203383	Intron (ENST00000530755.5/55742, intron 1 of 3)	PARVA
cluster_1	chr11_124481384_124482273	10.4833004416038	4.9004946465964	3.51229385963273	3.98417042955088	0.958925844013591	Exon (ENST00000642028.1/ENST00000642028.1, exon 2 of 2)	OR8B8
cluster_1	chr11_124745660_124747286	19.2813238012575	11.2638798598128	5.87962616924488	5.23403079431765	0.832677044120787	3' UTR	VSIG2
cluster_1	chr11_125062703_125064075	15.3445354518378	8.37388052431017	6.80914535282189	5.5981481588302	0.914485054278203	Promoter (<=1kb)	SLC37A2
cluster_1	chr11_125401374_125402234	10.5868479891664	6.31938136503842	2.66939920076264	4.46746335440274	0.787398545611735	Intron (ENST00000530517.5/63876, intron 6 of 11)	PKNOX2
cluster_1	chr11_125433219_125433994	9.12058713419591	5.25744880018999	5.55510586871706	3.55803264457094	0.727545238979976	3' UTR	FEZ1
cluster_1	chr11_12556354_12557461	8.6556043462988	2.54158091768186	1.71028668180552	5.15336193296195	0.598786831891373	Distal Intergenic	LOC105376556
cluster_1	chr11_125887170_125888432	25.9031792304732	12.2261913427637	11.7241415494115	8.42155849472151	0.860416989633936	Promoter (<=1kb)	HYLS1
cluster_1	chr11_125941379_125942383	15.4740092784405	4.36521601588821	2.66249230660978	5.35081936084287	0.817499845542111	Intron (ENST00000637851.1/29118, intron 8 of 8)	VSIG10L2
cluster_1	chr11_12598809_12599983	6.67653065584713	2.22357795475323	1.47395782787651	1.71346520616533	0.941816993885496	Distal Intergenic	LOC105376556
cluster_1	chr11_126104189_126105490	16.1717441835669	9.27894876963203	2.98066646578753	3.46246829333954	0.792473513839402	Distal Intergenic	LOC105369591
cluster_1	chr11_126159579_126160697	12.8588736341384	9.09943452675771	3.69521918785534	3.2657837340609	0.688457588229002	Distal Intergenic	LOC105369591
cluster_1	chr11_126336354_126337110	13.7841075324659	2.64678000432844	2.04474668764209	3.18251436981229	0.846653216437325	Promoter (<=1kb)	DCPS
cluster_1	chr11_126585628_126586515	15.3721615673151	3.97143579519001	3.59188003211009	6.3572818882624	0.743178102153452	Intron (ENST00000548204.1/ENST00000548204.1, intron 1 of 1)	LOC101929427
cluster_1	chr11_12687594_12688350	14.0015485641396	7.99972129639318	1.77886545858271	2.11159627826414	0.764683794392962	Intron (ENST00000527636.7/7003, intron 2 of 12)	TEAD1
cluster_1	chr11_126989993_126990850	15.4498578250075	5.36462978758709	7.05258494051311	11.1381323490716	0.516728534445128	Promoter (1-2kb)	MIR3167
cluster_1	chr11_12724261_12725168	20.9242343730664	4.82765483414132	5.92869940405482	8.2588818691124	0.730829224501205	Intron (ENST00000527636.7/7003, intron 2 of 12)	TEAD1
cluster_1	chr11_127363000_127364013	9.32503528237844	7.76368322177675	3.04679483976593	2.28209609779292	0.57863272291855	Distal Intergenic	LINC02712
cluster_1	chr11_12746520_12747117	23.6544654599958	19.1904285499993	6.51136376723454	8.98188903941026	0.605840317644981	Intron (ENST00000527636.7/7003, intron 2 of 12)	TEAD1
cluster_1	chr11_128548388_128549949	7.59068692881729	6.07610063564434	3.29688261029239	2.00793946361583	0.598913452064063	Intron (ENST00000392668.8/2113, intron 3 of 9)	ETS1-AS1
cluster_1	chr11_128582614_128583370	17.2327800447061	3.89387358289992	1.90012821648791	1.61143506258595	0.952724236292646	Intron (ENST00000392668.8/2113, intron 1 of 9)	ETS1
cluster_1	chr11_128593054_128593834	7.88463205442069	4.27882182515953	1.88256062292491	1.21811334698474	0.8086616821339	Distal Intergenic	ETS1
cluster_1	chr11_128686026_128686717	18.7461646957582	4.25677603272614	2.41853302459865	3.24383397532575	0.917613537425278	Promoter (<=1kb)	LOC101929538
cluster_1	chr11_128692859_128693394	15.0160688957399	10.715198560768	3.45193462106437	3.66923109954505	0.672714894028098	Promoter (<=1kb)	FLI1
cluster_1	chr11_128694669_128695379	11.9694907343407	8.05046651177637	4.88438855613394	2.93002259632007	0.708809849197887	Promoter (<=1kb)	FLI1
cluster_1	chr11_128784138_128784921	19.7288233136535	3.49252411453451	1.79172903843582	2.04019511890119	0.920664336475509	Intron (ENST00000608303.5/2313, intron 3 of 6)	FLI1
cluster_1	chr11_128814970_128815844	15.0249413516929	6.98738839324648	4.08965149658728	2.03379938441025	0.853731214642094	Distal Intergenic	FLI1
cluster_1	chr11_128859605_128860273	14.7802932155307	2.94713798899693	3.44436806730229	1.87589987406699	0.846740663755259	Intron (ENST00000392665.6/3758, intron 1 of 1)	KCNJ1
cluster_1	chr11_128870841_128871821	14.1666457731147	3.91561530371287	2.13741191328161	5.01832915162962	0.80071739579064	Distal Intergenic	KCNJ1
cluster_1	chr11_128903347_128904199	11.0691796166802	3.65492776143894	7.64013288738362	6.09340545686447	0.50418291693269	Promoter (1-2kb)	KCNJ5-AS1
cluster_1	chr11_129315707_129316490	14.6254412428236	6.001331662189	2.26351165496737	3.0351785987545	0.939367622895974	Distal Intergenic	ARHGAP32
cluster_1	chr11_129695388_129696505	21.1369423470825	7.03979360243423	8.66745876573999	6.13001897068337	0.798585873046889	Distal Intergenic	LINC01395
cluster_1	chr11_129815501_129816552	11.7671000307782	4.00527522003545	5.4433896466556	3.66686589443999	0.751691231321655	Promoter (<=1kb)	TMEM45B
cluster_1	chr11_130146003_130146898	26.6585662943354	6.16527527976766	2.3735861952878	2.80951759628275	0.961298129488163	Distal Intergenic	APLP2
cluster_1	chr11_130159316_130160291	12.8408546700673	6.15271938575292	2.85718771238471	3.15262357661021	0.916869576906487	Promoter (<=1kb)	ST14
cluster_1	chr11_130377913_130378765	19.8610129148949	1.80980261643951	0.589342801977813	0.826170884179964	0.897703647935582	Intron (ENST00000602376.5/646383, intron 2 of 5)	ZBTB44-DT
cluster_1	chr11_130383177_130384474	10.0751078327877	3.67684628850984	1.74888024395853	3.11568029696922	0.896941568963606	Intron (ENST00000602376.5/646383, intron 2 of 5)	ZBTB44-DT
cluster_1	chr11_130403262_130404561	23.5590929719953	2.08556749611628	2.50810415239365	2.94251353122147	0.83242388528633	Promoter (1-2kb)	ZBTB44-DT
cluster_1	chr11_130431234_130431673	21.9727261300628	6.92901212588969	5.05607631859732	8.92092380347597	0.790858452377119	Promoter (2-3kb)	ADAMTS8
cluster_1	chr11_130449893_130450462	24.2548372795034	8.34955179626546	9.43082449035969	6.59247404796726	0.828314370900348	Promoter (1-2kb)	ADAMTS15
cluster_1	chr11_130827590_130828287	11.0277093154767	3.85973893878486	4.30805167509647	3.99611981521571	0.820980540891315	Distal Intergenic	LINC02551
cluster_1	chr11_131217456_131218390	11.017159521722	1.91752488248779	1.11804293116802	1.84422823317346	0.881869307976671	Distal Intergenic	LOC107984412
cluster_1	chr11_131222921_131224672	6.05456577684597	2.10722037432258	1.34026466732242	0.783992366979375	0.931563612615766	Distal Intergenic	LOC107984412
cluster_1	chr11_131253094_131254991	15.0517839231436	3.18329931830889	2.58097979705008	4.08020634367177	0.830205526964479	Exon (ENST00000416553.2/ENST00000416553.2, exon 1 of 2)	LOC107984412
cluster_1	chr11_131392510_131393304	7.33879132995445	2.86368694819245	1.44399455407735	3.07747867588713	0.802045140741358	Intron (ENST00000374791.7/50863, intron 1 of 7)	NTM
cluster_1	chr11_131465707_131466175	17.5296956216866	6.02866531534267	3.52666414845344	4.21267520487968	0.96068941803028	Intron (ENST00000374791.7/50863, intron 1 of 7)	NTM
cluster_1	chr11_131503981_131504716	17.3562149211677	6.30337273708322	4.72644219809653	6.66225472565695	0.85758922593837	Intron (ENST00000374791.7/50863, intron 1 of 7)	LOC101929653
cluster_1	chr11_131656412_131657157	21.9786887150769	4.12067652195066	3.40892450905037	2.47495960441795	0.894863567181601	Intron (ENST00000374791.7/50863, intron 1 of 7)	NTM-AS1
cluster_1	chr11_131904525_131905348	15.5884629661421	2.99941542410983	2.04107953888833	2.89478406790663	0.880202659098076	Intron (ENST00000374791.7/50863, intron 1 of 7)	NTM
cluster_1	chr11_131982043_131982617	14.7133553461825	8.1468084944053	3.2555277936373	1.91051973041818	0.78546446999164	Intron (ENST00000374791.7/50863, intron 2 of 7)	NTM
cluster_1	chr11_133529859_133530786	12.6640565389565	3.53124599164418	1.84258218856155	2.4972827766742	0.94160447594356	Promoter (1-2kb)	OPCML
cluster_1	chr11_133540988_133542028	21.3822603939842	10.5118940042327	3.84127764839538	2.63205770377584	0.841511974523853	Intron (ENST00000663344.1/ENST00000663344.1, intron 1 of 1)	OPCML
cluster_1	chr11_133787391_133788302	12.6341626964869	2.78712605002552	1.43740083964054	1.48388262538343	0.942217900022206	Intron (ENST00000526254.1/646522, intron 2 of 2)	LINC02743
cluster_1	chr11_133894960_133895659	12.1200199547787	4.35746172066621	3.51307310224562	1.5181274080275	0.869223350529358	Promoter (2-3kb)	MIR4697
cluster_1	chr11_134272792_134273491	33.5264823970511	7.21214943293934	4.82339406182703	2.70857711759384	0.924286848008622	Promoter (<=1kb)	GLB1L3
cluster_1	chr11_134275643_134277399	14.0548059155552	5.57069074574291	7.43890873096102	6.88415763433961	0.702596791551586	Promoter (<=1kb)	GLB1L3
cluster_1	chr11_13486929_13488051	12.3162406050454	2.02350038071938	0.936828737865814	1.2991336022979	0.91400914561688	Distal Intergenic	PTH
cluster_1	chr11_134990169_134991173	21.2684205691391	1.75085373431649	1.11571724168479	0.893855950846815	0.881528853014397	Distal Intergenic	LOC100507548
cluster_1	chr11_14300358_14301243	13.0176795530362	3.64110741358256	4.51558179266378	5.01007409537765	0.760186451542595	Intron (ENST00000256196.9/22800, intron 1 of 5)	RRAS2
cluster_1	chr11_14340638_14341313	25.7158948769796	1.31611872828667	0.95655031878768	1.04450580990292	0.864218729620477	Promoter (<=1kb)	RRAS2
cluster_1	chr11_14904863_14906210	21.1492857501957	7.62270472648551	5.23519572126369	1.97203349343126	0.881582874994821	Promoter (<=1kb)	CALCB
cluster_1	chr11_14907379_14908123	17.3706034807608	4.53807932631351	3.36477744167424	3.33846187575574	0.917588695956286	Promoter (2-3kb)	CALCB
cluster_1	chr11_14969778_14970223	25.2571425955298	3.81759098351444	6.29251636634519	4.05767633501503	0.793732841532948	Promoter (<=1kb)	CALCA
cluster_1	chr11_15034749_15035747	13.4388961729673	2.19626591979505	2.16919797896691	0.992488625559969	0.874596034515853	Intron (ENST00000523376.5/797, intron 6 of 9)	CALCB
cluster_1	chr11_15547617_15548444	8.50211143087161	3.91228217578554	0.898048015100216	2.55137424664601	0.828791778274157	Distal Intergenic	LINC02751
cluster_1	chr11_15552330_15553086	14.0638244213676	5.5738615190714	1.63075675994692	2.74392150544109	0.925389391807235	Promoter (<=1kb)	LINC02751
cluster_1	chr11_15988747_15989406	16.0888968740926	2.22801187746105	2.28453463241794	2.32276531319857	0.850750332500421	Exon (ENST00000316399.10/55553, exon 13 of 15)	MIR6073
cluster_1	chr11_16986813_16987683	9.04341241029434	1.72589653913895	1.66688579088749	3.48899175532091	0.721782291480488	Intron (ENST00000531066.6/144100, intron 3 of 26)	PLEKHA7
cluster_1	chr11_17473289_17473780	16.7147208915038	3.99468954420016	6.38097690122413	5.05883895036708	0.73851566305554	Promoter (2-3kb)	ABCC8
cluster_1	chr11_17498040_17498805	9.00770179857649	1.97081973958339	3.41166264633805	5.06918802862228	0.578231368963302	Promoter (1-2kb)	USH1C
cluster_1	chr11_17544017_17544666	21.1021776353079	7.13207818931696	5.81714791655171	2.6203425576367	0.879667425433921	Promoter (<=1kb)	USH1C
cluster_1	chr11_17546883_17547616	25.3301923402789	8.06754363354693	6.2875056162748	3.28700543879922	0.9045474211535	Promoter (<=1kb)	OTOG
cluster_1	chr11_17695441_17696344	10.5272951708133	5.1934071774123	3.93737816630685	1.65364515554046	0.791641601803516	Promoter (<=1kb)	LINC02729
cluster_1	chr11_17720075_17721137	12.81016995323	6.32189038644961	4.95073260066376	3.87299832971671	0.919059145160358	Promoter (<=1kb)	MYOD1
cluster_1	chr11_18045887_18046712	11.0437680943201	4.53407644734044	3.96275492022961	2.39908411653257	0.873468456062787	Promoter (<=1kb)	TPH1
cluster_1	chr11_1824881_1825531	19.3778043832045	15.8876601733904	4.55467250012928	3.39499637723431	0.577147663530883	Promoter (2-3kb)	SYT8
cluster_1	chr11_18727346_18728013	10.5205957381376	4.65835221229055	4.51871967469367	2.15430841661208	0.791212866989574	Promoter (1-2kb)	IGSF22
cluster_1	chr11_19772202_19772901	17.1506920717734	3.10547980023504	1.16720595977112	2.29321779878099	0.91270565005544	Intron (ENST00000360655.8/89797, intron 1 of 37)	NAV2
cluster_1	chr11_19791089_19791793	24.1139224510218	1.66255746542787	0.914295539373691	2.1789862167807	0.855923772546928	Intron (ENST00000360655.8/89797, intron 1 of 37)	NAV2
cluster_1	chr11_19816889_19818295	22.2325224534805	2.08746353652713	1.52108425182965	1.00113939535475	0.882252673541057	Intron (ENST00000360655.8/89797, intron 1 of 37)	NAV2
cluster_1	chr11_19953182_19954358	10.1496637654119	2.16808501489128	2.09822259494348	4.09807464940271	0.721238880573524	Intron (ENST00000360655.8/89797, intron 10 of 37)	NAV2
cluster_1	chr11_19988551_19989261	9.04482884083893	2.521515292253	1.76339192884351	5.49805779557458	0.584081496309383	Intron (ENST00000360655.8/89797, intron 11 of 37)	NAV2
cluster_1	chr11_20026913_20027776	52.3677183697519	18.4169751155078	5.84928139922267	4.25309615060681	0.94117615830747	Promoter (<=1kb)	NAV2
cluster_1	chr11_20031169_20031877	7.36572645337528	4.44868695373247	1.47455840635772	2.03683857006571	0.775754225763654	Intron (ENST00000360655.8/89797, intron 11 of 37)	NAV2
cluster_1	chr11_20064822_20065811	10.174005780628	1.01002051560769	2.38347047201684	2.86218525047392	0.714615625484373	Intron (ENST00000360655.8/89797, intron 20 of 37)	NAV2-AS2
cluster_1	chr11_20131805_20132746	12.5327771834273	3.77830320974292	4.17491165529506	1.89111650638419	0.824025851281112	Exon (ENST00000623701.1/ENST00000623701.1, exon 1 of 1)	NAV2
cluster_1	chr11_20156264_20156982	18.7750046723792	3.54594091552354	4.22463210405773	1.79737608852677	0.843866974269444	Exon (ENST00000524983.3/120237, exon 4 of 4)	DBX1
cluster_1	chr11_20342365_20343323	18.0329230887327	7.43025269348233	5.64512881483715	2.68123053862366	0.862389081876784	Distal Intergenic	HTATIP2
cluster_1	chr11_20363463_20364630	14.5451723156597	6.42188172095469	6.27323083006596	4.13706429874618	0.846800611592315	Promoter (<=1kb)	HTATIP2
cluster_1	chr11_20544525_20545366	10.7284468391548	1.93752637088759	6.11570961080351	2.80187256834303	0.56764989257043	Distal Intergenic	SLC6A5
cluster_1	chr11_20596666_20597831	17.809684930373	4.605369140026	7.1257691192242	3.69768443419763	0.746590709359461	Promoter (1-2kb)	SLC6A5
cluster_1	chr11_2089068_2089964	11.4293341689512	1.6007636883996	1.50074455461546	2.16351382203246	0.833513599180325	Distal Intergenic	MIR483
cluster_1	chr11_22340622_22341412	19.4265635482899	5.17360937810686	12.0750228500505	6.77336663266968	0.561905211495294	Promoter (1-2kb)	SLC17A6
cluster_1	chr11_22528428_22529399	21.9580267122098	5.15737921176732	4.80057105640804	2.42100342081838	0.882260213208767	Distal Intergenic	LOC105376588
cluster_1	chr11_2299095_2299657	9.01899811175769	5.25341309300453	3.42244190920659	2.37526200606006	0.819440640854499	Promoter (2-3kb)	C11orf21
cluster_1	chr11_2444268_2445679	13.1505016002251	7.12848824042853	3.34949741844094	3.62181997901211	0.869765238869332	Promoter (<=1kb)	TRPM5
cluster_1	chr11_2693014_2694208	26.7188215583057	8.48154821804578	5.49844762048128	6.46567710706592	0.939716965122106	Exon (ENST00000597346.1/10984, exon 1 of 1)	KCNQ1OT1
cluster_1	chr11_27347628_27348820	13.1603271318789	6.57577788674009	2.77544553976955	1.42767274194845	0.823849525758525	Promoter (1-2kb)	CCDC34
cluster_1	chr11_27687777_27688741	10.5850990572296	2.65948233414879	2.21826007009082	2.2534465140122	0.892573914557015	Intron (ENST00000652063.1/497258, intron 5 of 5)	BDNF
cluster_1	chr11_27722223_27723290	18.0017037671202	8.27472080847511	9.88816820087787	5.21249134833958	0.713414717618576	Promoter (<=1kb)	BDNF
cluster_1	chr11_28793060_28794118	16.158259831341	2.12999954283562	1.90599588553439	1.4464542003766	0.87550998181347	Intron (ENST00000662190.1/ENST00000662190.1, intron 2 of 2)	LINC02742
cluster_1	chr11_30025341_30026256	12.315169852932	1.30992205740771	1.41341507346046	0.85357241984128	0.861608909265868	Distal Intergenic	KCNA4
cluster_1	chr11_30453645_30454378	11.9373658986202	2.76028343080202	4.71455522724602	5.46851317076875	0.649663428443015	Intron (ENST00000448418.6/744, intron 4 of 6)	MPPED2
cluster_1	chr11_307777_308442	17.6371743393909	11.5884664795171	1.87466007326936	5.93506445332691	0.675667965178065	Promoter (<=1kb)	IFITM2
cluster_1	chr11_3091578_3092389	24.5278106563627	6.19765653070534	3.40274171542073	4.72994846008032	0.92478572450321	Promoter (<=1kb)	OSBPL5
cluster_1	chr11_3109807_3110536	14.2967405828046	2.96295811848164	1.26335082936626	2.18997917852197	0.918618875315317	Intron (ENST00000263650.12/114879, intron 7 of 21)	OSBPL5
cluster_1	chr11_313388_314289	14.5364645237442	8.64838854498072	3.19562430926238	3.62636710176481	0.789905624440217	Promoter (<=1kb)	IFITM1
cluster_1	chr11_31601555_31602369	7.55467866821714	6.82228007824216	1.78316567090928	0.970323969967543	0.520151816434021	Promoter (1-2kb)	ELP4
cluster_1	chr11_3169225_3169991	12.1465836256002	3.88261691128535	3.49753773307633	2.43023418172117	0.896769664124085	Promoter (2-3kb)	OSBPL5
cluster_1	chr11_31819608_31820830	18.574444574191	7.15715004985803	9.14014736848977	4.42192769918322	0.728525761384667	Promoter (1-2kb)	PAX6
cluster_1	chr11_31863187_31864039	8.35871414161405	6.22838664237461	5.54955104785725	2.19727805472585	0.53662077572368	Intron (ENST00000530348.5/5954, intron 1 of 3)	PAUPAR
cluster_1	chr11_3188862_3189891	10.2944289992651	3.11587114886197	2.51017907585128	2.58843455167886	0.90936556715024	Exon (ENST00000455154.1/ENST00000455154.1, exon 1 of 2)	OSBPL5
cluster_1	chr11_320414_321257	11.8610088441869	9.8517619075908	2.38837694372104	3.47106917005978	0.577290604774242	Promoter (<=1kb)	IFITM3
cluster_1	chr11_32312835_32313631	11.6058133245959	2.87278845701263	3.16325052394583	1.77712247595747	0.850521953237336	Intron (ENST00000525689.2/ENST00000525689.2, intron 1 of 1)	WT1
cluster_1	chr11_32333305_32334238	15.7235426414482	5.66101862411871	4.2162758990381	2.61358965366319	0.918627401331994	Intron (ENST00000525689.2/ENST00000525689.2, intron 1 of 1)	WT1
cluster_1	chr11_32430768_32431380	12.4413641227711	6.48093470812515	6.06351609024671	2.58742214876935	0.726120482677304	Promoter (<=1kb)	WT1
cluster_1	chr11_32435513_32436173	15.2819698794048	5.12824436890474	3.78336747747282	1.82510450521427	0.902078492398916	Promoter (<=1kb)	WT1-AS
cluster_1	chr11_32829503_32830596	11.9714272513674	8.13991798344883	5.55863450977414	3.40705578327623	0.708652601899527	Promoter (<=1kb)	PRRG4
cluster_1	chr11_32891337_32891718	20.219467140048	8.9458064461941	2.27064516415958	2.78478402811344	0.881690706232749	Promoter (1-2kb)	QSER1
cluster_1	chr11_33065430_33065998	21.940220361416	4.41864766433501	6.46782325403736	5.24995062548927	0.785720050750544	Promoter (2-3kb)	TCP11L1
cluster_1	chr11_333836_334881	22.5066623082647	9.50006494940259	2.75925370447199	3.56804312479559	0.909439991546186	Distal Intergenic	NA
cluster_1	chr11_3408294_3409118	10.3043217151105	4.11905740995248	1.69758774259769	3.10706231669485	0.9005161507656	Exon (ENST00000685598.1/650368, exon 9 of 9)	TSSC2
cluster_1	chr11_35138675_35140029	10.5229305756358	6.77854680745132	6.34030371451372	4.03511375527155	0.717876258956093	Promoter (<=1kb)	CD44-DT
cluster_1	chr11_35237359_35238528	6.80057585683759	3.10327135062261	1.95336924340985	1.31695591909682	0.902723879886966	Distal Intergenic	CD44
cluster_1	chr11_36069826_36070975	11.997811958272	3.96106684535636	5.83503093648123	8.501366773438	0.511786844974301	Intron (ENST00000524419.5/143458, intron 1 of 5)	LDLRAD3
cluster_1	chr11_3807720_3808937	24.0856984736857	16.215310463852	11.6281997890126	8.42586104082952	0.760356121537147	Promoter (<=1kb)	PGAP2
cluster_1	chr11_3824591_3825193	17.1416409102564	1.94976517522856	1.97999985722375	4.78914642846339	0.756111835737302	Promoter (<=1kb)	PGAP2
cluster_1	chr11_3826512_3827232	13.1529517549582	3.70277371187776	2.80053921217967	2.87464969167153	0.917291725408135	Promoter (1-2kb)	PGAP2
cluster_1	chr11_393884_394697	16.6753334702347	10.7869721372204	2.00724823646233	2.57371932610574	0.696522367589003	Promoter (<=1kb)	PKP3
cluster_1	chr11_406602_407803	15.9124889981959	6.03473019812942	2.41269549734162	3.87711175894056	0.938701929695217	Promoter (<=1kb)	SIGIRR
cluster_1	chr11_416640_417822	24.2601179790724	10.3695532543197	3.07282384512558	3.80657053695346	0.906011862677757	Promoter (<=1kb)	SIGIRR
cluster_1	chr11_44065711_44066809	23.7604306824704	10.2281576822273	9.1907963630509	2.76377004713737	0.768370739714426	Promoter (<=1kb)	ACCS
cluster_1	chr11_441489_442263	20.5281646692511	6.96478275686987	2.944616606843	2.72835656828649	0.973663288410614	Promoter (<=1kb)	ANO9
cluster_1	chr11_44243028_44244287	9.21172439248819	5.32023294117482	0.942582308318923	1.41153052214319	0.752430688835849	3' UTR	EXT2
cluster_1	chr11_44285843_44286784	8.56085915514768	4.09950377772804	2.58323602018478	2.65388156321025	0.968059605049158	Intron (ENST00000652299.1/60529, intron 1 of 3)	ALX4
cluster_1	chr11_44309562_44310695	15.0065822712124	7.15632715202821	4.61871949186881	3.86740537031724	0.935971163246473	Promoter (<=1kb)	ALX4
cluster_1	chr11_44319092_44320199	8.18029850250226	7.54759049397485	3.01265632487588	2.27302658213005	0.518107620766241	Distal Intergenic	ALX4
cluster_1	chr11_44467392_44468304	8.38142126894515	3.97223303281699	2.24061975882746	1.52316807073723	0.887406440595882	Distal Intergenic	CD82
cluster_1	chr11_44670773_44671882	15.5228739495846	2.30960441782681	1.24791597065371	0.909228239424666	0.916010557931933	Distal Intergenic	LINC02704
cluster_1	chr11_44943775_44944600	13.4892432601382	6.77101354681868	3.24770382308049	3.35419670951364	0.9010003954514	Promoter (<=1kb)	TP53I11
cluster_1	chr11_44977425_44978264	8.63111831055919	2.3146885813387	3.34749352865695	3.29220433887515	0.729352459393216	Exon (ENST00000525114.2/221122, exon 4 of 4)	LINC02685
cluster_1	chr11_45082788_45083859	8.69639947882971	3.61292457794088	1.49772932576199	1.89643051522682	0.945521217136105	Distal Intergenic	PRDM11
cluster_1	chr11_45091577_45092554	16.0288243724755	3.78194180606533	0.805692290109838	2.61608356306214	0.92186840160511	Distal Intergenic	PRDM11
cluster_1	chr11_45233338_45233935	11.821007468176	2.88918291572608	5.62141920192258	3.86971461223059	0.664755763577798	3' UTR	PRDM11
cluster_1	chr11_45816577_45817252	12.9185826985189	3.97450979445998	2.05714537249414	8.60533239744307	0.545853781950707	Intron (ENST00000534128.1/ENST00000534128.1, intron 1 of 2)	SLC35C1
cluster_1	chr11_45921684_45922839	46.9071663039124	17.8391617574966	6.17610350782646	4.60388114188317	0.92796323884677	Promoter (<=1kb)	LARGE2
cluster_1	chr11_46001136_46001935	15.2979633942393	4.09087372893015	2.29987862952667	5.76362870245569	0.773892168424471	Intron (ENST00000676320.1/51317, intron 6 of 18)	PHF21A
cluster_1	chr11_46055328_46056032	17.0610373785133	8.10335953191395	4.50626240199467	2.48943337818849	0.858541893881365	Intron (ENST00000676320.1/51317, intron 6 of 18)	PHF21A
cluster_1	chr11_46202097_46203152	9.88370441311221	5.84852933686918	2.66714799321857	2.82165837246257	0.820703604822843	Distal Intergenic	LINC02710
cluster_1	chr11_46281235_46281816	11.4069185197062	5.01679659621034	1.20494450661399	5.28821997875723	0.708079714199341	Intron (ENST00000621158.5/90993, intron 1 of 11)	CREB3L1
cluster_1	chr11_46290561_46291014	26.3045916069449	10.3141375672267	5.50739107444356	8.63363695524669	0.908076952688143	Intron (ENST00000621158.5/90993, intron 1 of 11)	CREB3L1
cluster_1	chr11_46296701_46297410	28.0693597958749	9.6841730927202	5.89784521731052	2.52573601895669	0.910501765944076	Promoter (1-2kb)	CREB3L1
cluster_1	chr11_46338779_46339653	35.2275847335201	14.5169599523083	12.0780461410793	12.0360551191126	0.93317490872982	Promoter (<=1kb)	DGKZ
cluster_1	chr11_46352093_46352621	19.3691320960834	6.83069957668737	4.67156580509829	5.17671608052682	0.94920579313208	Intron (ENST00000343674.10/8525, intron 1 of 30)	DGKZ
cluster_1	chr11_46537189_46538290	12.0889569651704	7.05941487318845	3.77711515354236	8.60453677744088	0.580131086760699	Intron (ENST00000314845.7/55626, intron 8 of 18)	AMBRA1
cluster_1	chr11_46674692_46675701	9.47977280121717	3.89622330354787	1.88711266992304	1.52560365909096	0.938090791996873	3' UTR	ARHGAP1
cluster_1	chr11_46912443_46913277	38.0395937927807	13.5828431343801	16.9041573971992	17.6898164751805	0.735179282944103	Intron (ENST00000378623.6/4038, intron 1 of 37)	LRP4
cluster_1	chr11_4703989_4705093	10.3804692405191	3.14748611945671	3.43050707454432	2.19291258556376	0.845810410206212	Promoter (<=1kb)	MMP26
cluster_1	chr11_47160967_47161997	18.3911087140528	4.57609798600794	4.24299345200777	6.04245286297411	0.808898358978202	3' UTR	CSTPP1
cluster_1	chr11_47185120_47186776	24.9090151720255	12.9698333591303	6.70838174367583	6.20599099299871	0.88812435809186	Promoter (<=1kb)	PACSIN3
cluster_1	chr11_47186902_47187654	19.7406430527514	10.1279341464833	5.42463462865797	7.17491194366853	0.908639997970844	Promoter (<=1kb)	PACSIN3
cluster_1	chr11_47214130_47215706	26.4367864558498	12.8261357163849	9.20352839100656	11.8984604735734	0.897399890004056	Promoter (<=1kb)	DDB2
cluster_1	chr11_47257380_47258241	17.0823129861698	7.84885151251843	4.65696548315724	3.87187588053031	0.934278536119847	Promoter (<=1kb)	NR1H3
cluster_1	chr11_47259196_47259934	19.0787454395093	8.71987052508661	3.35804737473564	2.25376431930814	0.871550520426681	Promoter (<=1kb)	NR1H3
cluster_1	chr11_47354823_47355847	18.4336302606168	11.3959065848653	6.11469552729102	3.68428127937092	0.750883561110335	Promoter (2-3kb)	MYBPC3
cluster_1	chr11_47399911_47401159	12.8477604067502	6.43187352046696	3.16749554231106	4.70805870558782	0.887648085250886	Promoter (<=1kb)	MIR4487
cluster_1	chr11_47564945_47566394	14.4000068369807	9.08934584379461	5.04762946318476	5.76576060315575	0.836046551268103	Promoter (<=1kb)	CELF1
cluster_1	chr11_47714767_47715696	15.036726661879	8.44872588191467	3.85906382350189	3.71839011579707	0.837602353114138	Promoter (<=1kb)	AGBL2
cluster_1	chr11_47943742_47944670	10.7597088372407	6.4516644008325	3.80060296630589	1.5499323040396	0.724214995273961	Distal Intergenic	PTPRJ
cluster_1	chr11_5624774_5625619	10.601918704838	4.68175503448572	3.97012071633702	2.09988103955858	0.842554543110225	Promoter (<=1kb)	TRIM34
cluster_1	chr11_56659628_56660358	7.9597472948638	2.99635818518803	2.20524164537828	0.813832124901566	0.861820110810718	Distal Intergenic	OR5AR1
cluster_1	chr11_57237145_57237820	9.7171036076711	6.42573407687514	2.35218395390528	1.64966041219619	0.702432260263054	Promoter (<=1kb)	APLNR
cluster_1	chr11_57364864_57365716	9.10076588221485	2.71104047891846	2.02758241581571	2.53351192425978	0.894496247545732	Intron (ENST00000263314.3/5024, intron 8 of 11)	PRG3
cluster_1	chr11_57476222_57477183	14.9258495044108	6.54164016735141	5.4729939111801	4.45711961700785	0.929772021310613	3' UTR	RTN4RL2
cluster_1	chr11_57493333_57493997	15.2474702356434	3.57022014281863	2.27370757061397	2.33528136484561	0.927422019895221	Promoter (<=1kb)	SLC43A1
cluster_1	chr11_57646768_57647844	25.3502252969466	5.59970773906858	7.36425155642881	4.01560009746004	0.815728026389527	Promoter (<=1kb)	YPEL4
cluster_1	chr11_57781282_57781981	21.5282058791506	12.2400114442468	1.72825168158727	1.92354719673779	0.743825350721548	Promoter (<=1kb)	TMX2-CTNND1
cluster_1	chr11_57868247_57869242	14.3278154685989	1.60489719552916	1.74302839796217	2.45855843382918	0.823186417057581	Intron (ENST00000641215.1/ENST00000641215.1, intron 1 of 2)	CTNND1
cluster_1	chr11_58923222_58923785	10.1865987179905	2.10360105815029	4.13293177977792	5.89462197890944	0.554550132219614	Intron (ENST00000534674.5/92292, intron 1 of 2)	GLYATL1
cluster_1	chr11_59144527_59145239	12.9375338470828	4.15757371242461	4.59981908288423	3.84536990328987	0.838386872200909	Promoter (<=1kb)	FAM111A
cluster_1	chr11_59557221_59557900	25.7681965365244	9.728067873986	8.28001450520331	6.93864059138962	0.923750821444638	Intron (ENST00000659845.1/102723575, intron 1 of 1)	LINC02739
cluster_1	chr11_59891554_59892358	10.1052045629294	3.40501749998124	3.88542166451049	2.1685327211898	0.813255016280117	Intron (ENST00000646438.2/112577461, intron 2 of 4)	OOSP3
cluster_1	chr11_60851793_60853095	8.78519020043223	3.05455945089221	3.0294492865667	2.0566310680412	0.868947139646767	Promoter (2-3kb)	PTGDR2
cluster_1	chr11_61007502_61008924	13.6735417138109	7.83323316221074	7.78539411434307	3.8091586475022	0.686941747244725	Promoter (<=1kb)	CD6
cluster_1	chr11_61021472_61022275	13.0600254076483	3.3400850768885	2.01530251993651	1.94104281631754	0.944429690116876	Distal Intergenic	CD6
cluster_1	chr11_61482475_61483058	14.8104719038855	3.87061087148628	4.98229427797887	2.67321435861465	0.80510115210272	Promoter (1-2kb)	PPP1R32
cluster_1	chr11_61541576_61542553	13.3992615613743	4.42770367565007	3.42430318350685	3.71706145936248	0.918859027617409	Promoter (<=1kb)	SYT7
cluster_1	chr11_61577664_61578051	15.8960421705421	11.7936054072826	6.62837408486105	3.00921657525102	0.618586429901423	Promoter (2-3kb)	SYT7
cluster_1	chr11_61587155_61588949	18.1487519614838	9.80619004125293	4.80290729505038	5.03214762086987	0.876551180204313	Promoter (<=1kb)	LOC101927495
cluster_1	chr11_61599418_61600300	17.4910973077687	5.72480175423365	2.11615382964066	2.84619443537742	0.973150969755188	Intron (ENST00000667359.1/101927495, intron 2 of 3)	LOC101927495
cluster_1	chr11_61626502_61627287	24.899809141121	7.66909586962962	3.30807944377181	3.98669769916247	0.977328149641796	Promoter (1-2kb)	RPLP0P2
cluster_1	chr11_61695790_61696433	11.805656432659	3.90762122278238	2.34953686508929	4.19527670894493	0.845760768992517	Intron (ENST00000257215.10/747, intron 1 of 19)	DAGLA
cluster_1	chr11_61772076_61772594	14.8554182472345	4.15211166810597	4.97412379476751	5.02336129730125	0.794153738107348	Intron (ENST00000278836.10/745, intron 7 of 26)	MYRF
cluster_1	chr11_61777137_61777804	17.8721479411337	1.48069632194798	1.45348365066248	2.98969472713061	0.813345156568026	Promoter (<=1kb)	MYRF
cluster_1	chr11_61834314_61835120	17.0998024016467	2.48441897681764	3.34013581642166	3.63349170520017	0.80238841056611	Intron (ENST00000257261.10/9415, intron 1 of 11)	FADS1
cluster_1	chr11_61904284_61905179	16.7727867855824	7.02608121124731	3.81824319542651	4.06999486182717	0.972211827427974	Promoter (<=1kb)	RAB3IL1
cluster_1	chr11_61923161_61924055	14.3899940574555	9.48034527593041	1.56189974584288	4.1568872414314	0.684143839340639	Promoter (2-3kb)	RAB3IL1
cluster_1	chr11_61954940_61956436	19.7827499997394	8.21863740834857	4.9635737197156	2.61937229233068	0.892971478502278	Promoter (<=1kb)	BEST1
cluster_1	chr11_61971593_61972341	19.1313841268362	8.7959635766659	4.33758525550986	11.2522563254002	0.655259952642695	Distal Intergenic	LOC399900
cluster_1	chr11_62426420_62427167	7.35953642908388	4.7811917783488	1.68832330246327	2.81040802372571	0.736657690415314	Promoter (<=1kb)	LOC102723765
cluster_1	chr11_62505106_62505848	12.4166074783087	9.89303537944256	4.56293634223089	3.56348149870055	0.616874555719717	Intron (ENST00000530124.5/79026, intron 2 of 2)	AHNAK
cluster_1	chr11_62553155_62553845	25.7835023531429	10.4543631877757	6.27339584733166	6.96909160349646	0.977857920497868	Promoter (2-3kb)	AHNAK
cluster_1	chr11_62560469_62561031	24.2516069687752	9.10711290813932	1.42241405027478	3.62281568407038	0.911220366958936	Intron (ENST00000329251.5/1937, intron 7 of 9)	AHNAK
cluster_1	chr11_62611680_62613373	31.0931558348044	20.4082001850767	9.90454727360832	9.36615106833796	0.763737039535229	Promoter (<=1kb)	EML3
cluster_1	chr11_62757827_62758375	43.6325253216749	1.64640690105967	1.22885308203981	1.63329300413066	0.85860461519149	Distal Intergenic	POLR2G
cluster_1	chr11_62850504_62852130	30.7468369374003	7.38211259939792	2.06899046409309	3.09451943507236	0.970008132527338	Promoter (<=1kb)	SNORD22
cluster_1	chr11_62862273_62863154	15.6652397704699	8.11291995973345	5.68740704420895	8.55343104367113	0.793745284142437	Intron (ENST00000680002.1/6520, intron 1 of 12)	SLC3A2
cluster_1	chr11_62908908_62909992	21.4594941989627	4.63509286110113	2.59013872969998	3.51929123682843	0.915233293468083	Promoter (<=1kb)	LOC105369333
cluster_1	chr11_62925372_62926098	13.9359845716815	6.33363786231143	2.8594228149564	3.24516252358519	0.930680559218278	Distal Intergenic	CHRM1
cluster_1	chr11_6319032_6321133	18.2279470014204	7.78997458490857	3.99861699901651	3.47901610437591	0.942549465957935	Promoter (<=1kb)	LOC101927825
cluster_1	chr11_6323274_6323758	33.9540593420235	0.259704524397703	0.969653181660544	1.5664587780311	0.832372245081139	Promoter (<=1kb)	LOC101927825
cluster_1	chr11_63489838_63491436	10.3914897589577	7.43996585368535	4.16272791496833	2.80543017135649	0.68366485059842	Promoter (<=1kb)	PLAAT5
cluster_1	chr11_6353302_6353843	17.3215338948241	6.86056300290485	8.78410724140397	3.66132799268216	0.70460780150407	Intron (ENST00000655261.1/101927825, intron 5 of 5)	LOC101927825
cluster_1	chr11_63763813_63764449	36.2734537490986	17.703711016603	19.4392440089173	10.6461962585016	0.738156128643979	Promoter (1-2kb)	ZFTA
cluster_1	chr11_63888238_63888949	11.9631297456701	4.76820918570749	2.02380307048425	1.58764102808851	0.932473335492406	Promoter (<=1kb)	MARK2
cluster_1	chr11_63907777_63908213	15.4578586513029	6.90225317457414	5.40995500952987	6.64439887462622	0.894868417335575	Intron (ENST00000377810.8/2011, intron 16 of 17)	RCOR2
cluster_1	chr11_63909540_63910498	25.2827325764165	13.644544810295	9.06274011176342	11.7225228760475	0.900243456923137	Promoter (1-2kb)	RCOR2
cluster_1	chr11_63920181_63920511	40.1925048495881	15.8250379268534	9.4279991780134	7.28991704456117	0.952705790220611	Distal Intergenic	RCOR2
cluster_1	chr11_63998502_64000831	23.8012099014818	13.4468683788745	10.1441853373878	10.6603043631258	0.973822723472166	Promoter (<=1kb)	MACROD1
cluster_1	chr11_64034396_64035029	13.0431338660325	4.89766329962956	3.63195023219581	4.96326853919569	0.872423468067819	Promoter (<=1kb)	FLRT1
cluster_1	chr11_64246603_64247777	42.6660541057665	30.3025075437569	18.3229355939751	20.3797937099586	0.785776654612861	Promoter (<=1kb)	PPP1R14B-AS1
cluster_1	chr11_64249435_64249905	40.5082725435964	4.53666596321454	3.37865089232128	2.94700775225585	0.881466073669419	Promoter (1-2kb)	PLCB3
cluster_1	chr11_64340580_64341361	27.1036359841782	8.70840037860843	2.97311845175463	3.74425731615216	0.975932851508543	Promoter (<=1kb)	CCDC88B
cluster_1	chr11_64341967_64343081	26.9417296802275	13.2204964533665	7.35073295338215	9.77783376181489	0.921335367421332	Promoter (<=1kb)	CCDC88B
cluster_1	chr11_64356508_64356911	16.6599873679936	6.57571684829873	4.48972023163614	4.93847707877555	0.962759420601747	Promoter (1-2kb)	CCDC88B
cluster_1	chr11_64372782_64373725	11.7299243625701	2.62015826390037	0.919813345934923	3.00819525346078	0.843740548532134	Distal Intergenic	MIR1237
cluster_1	chr11_64565274_64566095	11.4147997477198	6.10013178309028	2.57493460818402	3.49002433508928	0.863593927267854	Promoter (1-2kb)	SLC22A11
cluster_1	chr11_64629972_64630897	28.2533036058353	4.20693013572768	2.7095015742767	2.85541485136945	0.896481908460673	Exon (ENST00000301894.6/9379, exon 3 of 7)	NRXN2
cluster_1	chr11_64644479_64645262	15.2648660830772	4.86007471534129	2.50355914624934	6.43479082085252	0.758603046086077	Promoter (<=1kb)	NRXN2
cluster_1	chr11_64649303_64649725	13.2136235946158	7.55010831789764	2.84856319343903	2.93957126343473	0.806973910886691	Promoter (2-3kb)	NRXN2-AS1
cluster_1	chr11_64652900_64653728	16.5083418932149	7.11317492223771	6.06526124015168	7.73799690205579	0.837263160069095	Promoter (2-3kb)	NRXN2
cluster_1	chr11_64711114_64711858	28.4545552417693	6.43043116944705	4.85457110879189	9.41706634675162	0.792340248701069	Promoter (<=1kb)	NRXN2
cluster_1	chr11_64729645_64730538	22.1269909687965	5.99193287269727	2.88557535575481	3.85479615677879	0.950485446447463	3' UTR	RASGRP2
cluster_1	chr11_64742685_64743340	23.5593887168485	13.0105669812618	7.77342181188654	7.80399055126037	0.908722654992559	Promoter (<=1kb)	RASGRP2
cluster_1	chr11_64743598_64743852	36.2316509119271	8.85210408225132	5.07278350441594	5.64818375000993	0.938156847809807	Promoter (<=1kb)	RASGRP2
cluster_1	chr11_64744668_64746351	21.177172457607	11.3271107064158	7.92078727208815	7.49476602682072	0.950633531878481	Promoter (<=1kb)	RASGRP2
cluster_1	chr11_64759722_64760621	31.2724474511256	13.6695877965809	6.30124737863965	7.4796033421301	0.945016994357313	Promoter (<=1kb)	PYGM
cluster_1	chr11_64762433_64764442	20.8771804989162	9.14423184682597	4.59687656019532	3.3211747147671	0.911663638397144	Promoter (2-3kb)	PYGM
cluster_1	chr11_64802713_64804308	30.0636820736581	21.875559026916	12.6210354952969	14.0182098441355	0.753784692518926	Promoter (<=1kb)	MAP4K2
cluster_1	chr11_64844320_64845089	26.8841242964758	19.1672740625661	6.42280887648771	7.57016774265211	0.68069281314162	Promoter (<=1kb)	CDC42BPG
cluster_1	chr11_64846962_64847550	37.1364366204302	12.594760658641	9.46876264389649	13.9021389735179	0.845053446442446	Promoter (2-3kb)	CDC42BPG
cluster_1	chr11_64887751_64888537	23.3912302121654	14.0752511422328	6.96653271099527	5.80476355737234	0.79931298471212	Promoter (<=1kb)	EHD1
cluster_1	chr11_64935471_64936199	10.5987147281096	7.39443482600112	1.6060944511709	3.5442825751319	0.664300180334968	Promoter (<=1kb)	GPHA2
cluster_1	chr11_64996459_64997361	17.2148580691754	5.21756940312614	1.64099725223412	3.19431264429331	0.945563652643468	Promoter (<=1kb)	BATF2
cluster_1	chr11_65066454_65067507	20.8906567764705	5.00303896787391	2.39666260407895	2.92507439472688	0.947750144156271	Exon (ENST00000529290.5/113130, exon 5 of 6)	NAALADL1
cluster_1	chr11_65180849_65182575	35.1061485358954	18.5206398114662	12.0778537939052	13.7833710418479	0.950049133082891	Promoter (<=1kb)	CAPN1-AS1
cluster_1	chr11_65184186_65184573	24.8343993766055	6.06192792469245	3.08475127310124	1.5276344918022	0.949569453935588	Promoter (<=1kb)	CAPN1
cluster_1	chr11_65204235_65205339	15.8972201336207	3.71188025282366	2.56811521645026	2.74677657121037	0.914146625177026	Promoter (<=1kb)	CAPN1
cluster_1	chr11_65213192_65214199	40.0372850036646	3.17619968311728	1.6341500903177	3.10521279063662	0.869502507315782	Promoter (<=1kb)	SLC22A20P
cluster_1	chr11_65224894_65226137	15.4122117729379	6.73837161384315	2.82917041528783	4.14705990684619	0.924664823083366	Exon (ENST00000525264.5/440044, exon 6 of 6)	SLC22A20P
cluster_1	chr11_65274785_65275474	7.55555571964807	4.71886068127035	1.74727702498904	5.70840998543792	0.515663821773668	Intron (ENST00000527850.5/23649, intron 3 of 15)	POLA2
cluster_1	chr11_65301710_65302446	14.9343084687825	13.7621408132577	4.14501611711411	2.16371226174543	0.509295158457505	Intron (ENST00000649896.1/23649, intron 17 of 19)	POLA2
cluster_1	chr11_65316933_65317505	23.9316698722027	4.69519243441281	3.41247847319046	3.39004842764105	0.901607741723142	Promoter (<=1kb)	CDC42EP2
cluster_1	chr11_65390303_65391471	9.14132980237934	4.1868015354385	1.5915489470228	1.78260805833607	0.904809715199092	Promoter (2-3kb)	FRMD8
cluster_1	chr11_65454715_65455510	16.9705441472168	7.54955431818364	3.74927527584895	7.41366684723796	0.809034951213372	Promoter (<=1kb)	FAUP4
cluster_1	chr11_65538966_65541238	24.6326622113305	12.7645351294911	7.16913576938083	15.4743523441851	0.65076394037614	Promoter (<=1kb)	LTBP3
cluster_1	chr11_65546263_65547076	32.9215465473162	20.0820493938261	9.98832451944171	9.77972731921603	0.813695569444317	Promoter (<=1kb)	LTBP3
cluster_1	chr11_65553192_65554018	22.3300845137296	11.3210897412075	4.05790240369857	7.21342650266671	0.848423943371041	Promoter (<=1kb)	LTBP3
cluster_1	chr11_65560594_65561492	17.9574996776745	11.1276147202413	6.67756929112098	6.21432233013897	0.841302109319341	Promoter (1-2kb)	LTBP3
cluster_1	chr11_65574113_65574786	39.4205057352375	15.4674061438551	9.26342276680331	11.1059972153849	0.964829717190965	Promoter (1-2kb)	EHBP1L1
cluster_1	chr11_65586708_65587172	12.6133363527189	9.77045207111804	1.08846744705763	3.63102205324056	0.594017085426705	Promoter (2-3kb)	EHBP1L1
cluster_1	chr11_65591782_65592863	27.4305817998483	13.4812245711046	6.0899055450098	5.52112054984648	0.886595352826226	Promoter (<=1kb)	EHBP1L1
cluster_1	chr11_65613963_65614595	39.4622969733978	21.6642550660227	10.4853493487606	17.4498831444402	0.820535860102113	Promoter (<=1kb)	MAP3K11
cluster_1	chr11_65637659_65638959	38.878918464913	21.4626208311568	10.2206939548859	10.9700352879464	0.863634292823851	Promoter (<=1kb)	SIPA1
cluster_1	chr11_65641897_65642473	30.0406867702791	4.72294748445722	2.36772192096816	3.23771212039813	0.90643512684028	Promoter (<=1kb)	SIPA1
cluster_1	chr11_65646752_65647697	26.2086445954337	5.42275076130238	2.51017149259109	2.80728829217557	0.941327439324065	Promoter (<=1kb)	SIPA1
cluster_1	chr11_65652221_65653343	36.0970104931015	32.2679750475715	14.7030712161586	15.5950275937485	0.557121929557988	Promoter (1-2kb)	SIPA1
cluster_1	chr11_65779757_65781822	20.6116491651647	14.5407886697663	8.31422992655999	7.12651558943833	0.735045293865819	Promoter (<=1kb)	AP5B1
cluster_1	chr11_65787858_65788732	17.5938975280621	6.0347992402894	2.21661530623101	2.32338960455963	0.969982080483343	Promoter (<=1kb)	OVOL1
cluster_1	chr11_65851137_65851835	13.7121323433448	9.2965581396007	2.94519128829903	2.46721912642618	0.688861222279026	Exon (ENST00000526972.5/254122, exon 5 of 5)	CFL1
cluster_1	chr11_65867129_65868484	17.8012355714654	12.8953741043548	4.70553763276483	4.34122010074721	0.667524842212444	Promoter (<=1kb)	EFEMP2
cluster_1	chr11_65891817_65892049	39.6660828040466	13.9345445341587	5.68507674626511	7.58149311545505	0.968888064061436	Promoter (1-2kb)	CCDC85B
cluster_1	chr11_65899934_65900860	35.9698595186892	20.1221399403119	6.26799974464819	8.31058179315075	0.806186951481389	Promoter (<=1kb)	FOSL1
cluster_1	chr11_65911423_65912301	11.701214379839	4.89247497098308	2.05714386219103	3.78024093123578	0.888212356474896	Distal Intergenic	C11orf68
cluster_1	chr11_66022285_66023046	19.9670436833002	8.64352157794496	4.44447427048899	3.64357560826157	0.93220183839445	Promoter (1-2kb)	CATSPER1
cluster_1	chr11_66045060_66045704	17.9864665970308	8.5269555422584	4.74323291809128	3.79979653160074	0.911420707674388	Promoter (<=1kb)	GAL3ST3
cluster_1	chr11_66222307_66223157	16.3591077143243	7.49720570341675	4.26832218072522	5.76896499389824	0.929363912868709	Promoter (1-2kb)	PACS1
cluster_1	chr11_6629681_6631032	11.0615541644742	6.10729518533277	2.22498420853494	2.07241822011026	0.812006443452128	Promoter (2-3kb)	DCHS1
cluster_1	chr11_66317817_66318409	17.4344107006042	4.65772261717935	3.80042981463182	5.01524860646373	0.859653742108493	Promoter (<=1kb)	CD248
cluster_1	chr11_66328134_66329054	15.7975503237926	9.13873835431718	3.52158453409008	5.0131057152429	0.814531467183738	Distal Intergenic	RIN1
cluster_1	chr11_66335638_66337197	18.4249261821348	12.3996345593651	6.47065877859338	11.4122957863753	0.673427744381778	Promoter (<=1kb)	RIN1
cluster_1	chr11_66363939_66364519	26.3100802856074	3.58952095264513	1.88722280968978	2.62433114818651	0.895388729329436	3' UTR	B4GAT1-DT
cluster_1	chr11_66370997_66372643	53.5673871013512	25.2775604169385	9.01065738473957	19.8729405440532	0.825759664225151	Promoter (<=1kb)	SLC29A2
cluster_1	chr11_66421441_66422086	26.36012576647	24.8131643907267	10.0488755101437	11.8305096174496	0.517109649175823	Promoter (<=1kb)	NPAS4
cluster_1	chr11_66479748_66480884	46.570205961752	34.3166319369179	18.248441757934	31.4614487791044	0.619949415412753	Promoter (<=1kb)	DPP3
cluster_1	chr11_66545609_66547053	41.7861589764064	32.1540616326609	17.8051439637963	21.2058220093344	0.702283736109062	Promoter (<=1kb)	ZDHHC24
cluster_1	chr11_66547598_66547941	20.9397225839929	17.5933152307406	2.65751895272477	2.35942201574335	0.555820252819467	Promoter (<=1kb)	ACTN3
cluster_1	chr11_66592598_66593584	37.2430225940765	20.1826993343139	12.0593202529342	16.1259247745173	0.892341970473474	Promoter (<=1kb)	CCDC87
cluster_1	chr11_66720193_66720810	19.0220800396337	12.3671621628465	3.20469241111263	5.72366019630005	0.715829191786402	Promoter (<=1kb)	SPTBN2
cluster_1	chr11_66868653_66869199	22.5332275302057	8.08846589998118	2.64248704678023	1.778653246755	0.934265507040109	Promoter (2-3kb)	PC
cluster_1	chr11_66915059_66915661	11.5202797443484	4.34777615276699	3.70255320800167	4.23620984266907	0.886051071645559	Intron (ENST00000529047.6/5091, intron 3 of 22)	PC
cluster_1	chr11_66975854_66976389	13.4467332031408	4.37942420385218	3.55340490619251	2.40945005073988	0.916458809256726	Promoter (<=1kb)	C11orf86
cluster_1	chr11_67053855_67054359	15.1575295221639	5.56719611823027	3.77762894554981	3.2678526784623	0.963802492522859	Promoter (2-3kb)	RHOD
cluster_1	chr11_67056616_67057397	20.1110994772457	12.2421452878238	3.11434444102069	3.93758143522958	0.745233037047277	Promoter (<=1kb)	RHOD
cluster_1	chr11_67071342_67072125	20.6653092736417	3.92075673732688	1.74640268986581	2.13293521280469	0.932903928920107	3' UTR	RHOD
cluster_1	chr11_67081433_67082442	12.7732686491906	4.00255178017369	1.11781768317828	3.66882889632718	0.854034542162049	Distal Intergenic	RHOD
cluster_1	chr11_67261076_67262199	11.8416811239925	8.39048181152956	3.70317506935724	6.54265555903457	0.671519277799568	Exon (ENST00000652902.1/ENST00000652902.1, exon 1 of 3)	GRK2
cluster_1	chr11_67270212_67271210	13.1492257146989	5.24845922872909	2.50499026011702	5.69296218453679	0.78608769882894	Promoter (<=1kb)	GRK2
cluster_1	chr11_67276941_67278057	21.1798640420101	8.82061838335098	4.21665682194687	3.17252805400184	0.926231216060184	Promoter (<=1kb)	GRK2
cluster_1	chr11_67302037_67304177	25.5909541436647	12.8434716897845	6.87766847966876	6.95521064101102	0.919926394669324	Promoter (<=1kb)	SSH3
cluster_1	chr11_67356849_67357326	19.9414945710737	14.3810576237284	6.15274854626052	6.88836338964436	0.699577886833926	Promoter (<=1kb)	POLD4
cluster_1	chr11_67396410_67397181	18.0075429597705	2.00796190913935	1.61720480089248	3.56008650287429	0.81436997499222	Promoter (<=1kb)	RAD9A
cluster_1	chr11_67409855_67410518	21.5383570471264	5.87443648803211	2.27589101890915	2.73071085319166	0.975054884228909	Promoter (<=1kb)	TBC1D10C
cluster_1	chr11_67415100_67416224	13.7664465603648	4.1300334415746	2.20998798459663	3.42249465019916	0.918214512027353	Promoter (<=1kb)	CARNS1
cluster_1	chr11_67420566_67421733	48.0430332389468	29.9645739136983	17.698166539984	25.4318089960184	0.804146912135433	Promoter (<=1kb)	PPP1CA
cluster_1	chr11_67436250_67437513	15.5029995092861	2.06792170453895	2.63499764815132	1.40492821195635	0.844763491301696	Promoter (<=1kb)	PTPRCAP
cluster_1	chr11_67505950_67506430	30.3389643807911	17.7638196584372	11.116628000523	18.8831971413755	0.70637575846316	Promoter (<=1kb)	PITPNM1
cluster_1	chr11_67572657_67573117	12.9116551369545	4.61548240801348	2.4820447637634	5.51521176264298	0.779987685702512	Distal Intergenic	GSTP1
cluster_1	chr11_67613943_67614747	15.6059526048187	6.78100312317821	4.01207997014608	3.36636005638058	0.948387102722227	Promoter (1-2kb)	DOC2GP
cluster_1	chr11_67621501_67622389	12.4790616169722	2.78731958925359	1.3089190210391	1.83184188559144	0.933505053309112	Distal Intergenic	DOC2GP
cluster_1	chr11_67639694_67640416	11.85228195241	8.24448732087938	4.63292760246875	3.80730261086059	0.733720130817036	Promoter (<=1kb)	TBX10
cluster_1	chr11_67710746_67712048	10.2898251837678	4.46080917490114	1.63577721651484	1.3694610213381	0.901030497818739	Exon (ENST00000530315.1/ENST00000530315.1, exon 3 of 3)	ALDH3B2
cluster_1	chr11_67791814_67792638	9.01819922811961	3.57412645294365	2.03136520870602	2.96137450736797	0.919292384639169	Exon (ENST00000533887.1/ENST00000533887.1, exon 8 of 8)	FAM86C2P
cluster_1	chr11_67990650_67992135	18.2966278869255	4.46377526394554	2.7355734811377	1.35428634720683	0.935089547606762	3' UTR	UNC93B1
cluster_1	chr11_67996610_67997488	38.0316245539156	14.1641355089694	7.11149399033205	4.943826936108	0.945057828754471	Promoter (<=1kb)	UNC93B1
cluster_1	chr11_68003028_68004700	16.4477102381028	11.4865416914828	5.28681212300517	6.88231635209883	0.734908270578155	Promoter (<=1kb)	UNC93B1
cluster_1	chr11_68020562_68021117	13.6799359363021	3.5716917600843	2.95758440199388	3.05358874706478	0.894343861416529	Promoter (<=1kb)	ALDH3B1
cluster_1	chr11_68038441_68039265	20.3016479206222	10.9924695789645	3.77813357365004	3.98740450413109	0.822341125344211	Promoter (<=1kb)	TCIRG1
cluster_1	chr11_68040238_68040680	23.7343851810251	7.11051474640684	4.02700801014764	2.71482270524951	0.956528248740041	Promoter (1-2kb)	TCIRG1
cluster_1	chr11_68127877_68129099	37.6388827499116	10.7923809832341	7.17890645935129	8.39479443855554	0.927238549889362	Exon (ENST00000530842.2/105369362, exon 2 of 3)	CHKA-DT
cluster_1	chr11_6817566_6818505	9.31085767676506	2.27878281844153	3.97219819201379	3.19723864366387	0.698239830360107	Distal Intergenic	OR6A2
cluster_1	chr11_68209224_68209938	12.525531365903	9.4563745913713	3.50638884863461	5.4374046857206	0.653671648002084	Promoter (2-3kb)	KMT5B
cluster_1	chr11_68257320_68258085	12.9376924686104	6.97481166032186	2.94502465973827	4.60590459845211	0.846978869588733	Distal Intergenic	C11orf24
cluster_1	chr11_68297495_68298281	12.6793608639343	8.08541759315548	3.67044920858884	4.08127358544242	0.783342337505341	Distal Intergenic	LRP5
cluster_1	chr11_68314466_68315206	12.8885893107989	7.07840878475164	3.43718924653957	4.45994699759572	0.873729252312756	Promoter (1-2kb)	LRP5
cluster_1	chr11_68330089_68330833	14.811844518656	5.27716843349942	3.47165809231743	4.58061322753876	0.919398082449806	Intron (ENST00000294304.12/4041, intron 1 of 22)	LRP5
cluster_1	chr11_68342181_68343191	12.9138703551737	7.71251003865252	2.00750672598761	3.62524047007818	0.759929320570614	Intron (ENST00000294304.12/4041, intron 1 of 22)	LRP5
cluster_1	chr11_68354000_68354856	6.41852408914681	1.34152139444598	1.67903802986851	1.90785097209954	0.785164549592769	Intron (ENST00000294304.12/4041, intron 2 of 22)	LRP5
cluster_1	chr11_68446939_68447651	16.2616504192608	7.13138950318724	4.12592607468662	6.62139564608901	0.865376515041363	Promoter (<=1kb)	LRP5
cluster_1	chr11_68684341_68685429	9.38443400730434	5.03651817963414	3.70791451217557	3.09191303584307	0.91867753542999	Promoter (<=1kb)	GAL
cluster_1	chr11_68694466_68695294	16.1642885232999	1.91144599977379	1.4502717303339	1.06344830068032	0.885449433873366	Distal Intergenic	GAL
cluster_1	chr11_68749854_68751925	26.6834728295037	9.02081335901334	3.25973938250222	3.34418472925039	0.970442486450351	Promoter (<=1kb)	TESMIN
cluster_1	chr11_68840681_68841136	17.1284124800269	13.4025660301513	4.75146500602208	4.24260765561495	0.618547956210289	Promoter (<=1kb)	CPT1A
cluster_1	chr11_68843897_68844281	25.6451305151406	8.2835994001655	3.83902301174227	5.13473160175787	0.965214517927453	Promoter (<=1kb)	CPT1A
cluster_1	chr11_68854531_68855857	8.64735139264013	7.33167039765123	2.41123131584451	2.73169913095919	0.574758850111497	Distal Intergenic	CPT1A
cluster_1	chr11_68889980_68890713	8.1639988329846	3.16093202033314	1.14982537923448	2.60400738514369	0.866906788403356	Distal Intergenic	MRPL21
cluster_1	chr11_69088560_69089732	7.48447074263826	2.84284806490163	1.877962885723	3.12326631258999	0.82646845746911	3' UTR	MIR3164
cluster_1	chr11_69122527_69123613	14.7157778261059	7.12911147386902	3.34983313946525	2.62671600452823	0.88131958706218	Intron (ENST00000637504.1/219931, intron 19 of 19)	SMIM38
cluster_1	chr11_69131286_69132225	10.4032711228649	5.34887515111959	3.08230375382498	3.18801351749243	0.930031604614689	Intron (ENST00000637504.1/219931, intron 19 of 19)	SMIM38
cluster_1	chr11_69249609_69250593	10.7743851887034	4.31110043174161	2.4523348517845	2.86590852837129	0.973144263263624	Distal Intergenic	MYEOV
cluster_1	chr11_69434468_69435008	21.9613907288107	5.76259397615875	2.93123553131112	1.38730028685481	0.949164726135176	Distal Intergenic	LINC02953
cluster_1	chr11_69436986_69437581	18.4832529139544	14.156419102401	2.14495180263981	3.22770829260083	0.606793238667331	Distal Intergenic	LINC02953
cluster_1	chr11_69521224_69521988	22.1284258977151	3.0548027853084	1.85718020058466	1.22343745038232	0.906511346377701	Distal Intergenic	LINC01488
cluster_1	chr11_69638088_69638586	31.9764774328478	18.9782877674577	6.01760330996654	5.23988687675365	0.759729325917474	Promoter (2-3kb)	CCND1
cluster_1	chr11_69685761_69686320	12.785077608973	7.57320882648589	3.190037271409	5.71857922045105	0.77387862383487	Distal Intergenic	LTO1
cluster_1	chr11_69700542_69701116	38.9309065724261	9.88303723336079	4.08595041536527	2.69504628029357	0.967697163273899	Promoter (2-3kb)	FGF19
cluster_1	chr11_69702283_69702674	29.5434843275753	10.3524570539991	2.95874797889666	3.25782515260017	0.952575407952822	Promoter (1-2kb)	FGF19
cluster_1	chr11_69703748_69704971	24.9750847527258	12.8713844694496	6.19617986493194	4.96799630939477	0.862648361136601	Promoter (<=1kb)	FGF19
cluster_1	chr11_69775082_69775951	9.68911030557106	5.56249216024401	2.10899171094728	2.90916313703901	0.816837267057546	Promoter (<=1kb)	FGF4
cluster_1	chr11_69984428_69985225	11.8826926371141	5.43487021056758	3.10967500694067	3.01981476302485	0.954860536434048	Promoter (<=1kb)	ANO1
cluster_1	chr11_70072985_70073870	11.0898742106361	2.21475916311136	1.31480058369344	2.39824303362154	0.866667142793183	Promoter (1-2kb)	LINC02584
cluster_1	chr11_70128383_70129205	12.0231529132781	5.25612584625155	1.59659465509781	1.48758188301611	0.888722107765489	Intron (ENST00000531349.6/55107, intron 12 of 27)	ANO1
cluster_1	chr11_70312390_70313319	10.6565625900284	1.04038448080738	1.59526793031376	1.64180835854371	0.809095381490257	Intron (ENST00000253925.12/8500, intron 2 of 27)	PPFIA1
cluster_1	chr11_70568011_70568997	10.6974809608393	4.4038336779452	2.26814684717668	3.68113383202706	0.897590099258397	Intron (ENST00000601538.6/22941, intron 17 of 25)	SHANK2-AS1
cluster_1	chr11_705828_706750	14.4468262593353	5.39058677229194	3.183833318115	3.26112275354792	0.980882757076335	Promoter (<=1kb)	DEAF1
cluster_1	chr11_70647072_70647921	17.6156959890514	1.75713520507152	1.02747138708704	1.75586952065113	0.869795581502552	Exon (ENST00000429268.1/ENST00000429268.1, exon 2 of 2)	SHANK2
cluster_1	chr11_706811_707543	13.7211924302741	7.72230537579163	4.2563828798884	3.70078452740352	0.857148024214929	Promoter (<=1kb)	DEAF1
cluster_1	chr11_70713845_70714382	19.5244164218181	5.35602808600494	1.53733944609489	4.39234953662239	0.896152037714474	Intron (ENST00000601538.6/22941, intron 14 of 25)	SHANK2
cluster_1	chr11_70742413_70743215	14.2156558225223	7.6233107364429	3.11292373050267	3.02416591869487	0.842712198627328	Intron (ENST00000601538.6/22941, intron 14 of 25)	SHANK2
cluster_1	chr11_70814816_70815563	13.9681740529915	5.25386480533076	1.66219669753437	2.04086981919644	0.946338456027168	Intron (ENST00000601538.6/22941, intron 12 of 25)	SHANK2
cluster_1	chr11_71086657_71087382	10.4760931144023	2.56775265335778	2.69906312094425	5.05812940126945	0.673249999837804	Intron (ENST00000601538.6/22941, intron 8 of 25)	SHANK2
cluster_1	chr11_71120351_71121105	12.8239802538179	4.09972224981667	1.53535219073617	2.10438268336039	0.972825797841054	Intron (ENST00000601538.6/22941, intron 3 of 25)	SHANK2
cluster_1	chr11_71245889_71246910	24.2797590355283	4.89948123969306	0.432967768103059	0.628998574204646	0.978545097475344	Intron (ENST00000601538.6/22941, intron 1 of 25)	SHANK2
cluster_1	chr11_71251322_71253578	19.8336186903198	13.4400108991832	4.46013240621634	4.80433526044721	0.705041853638034	Promoter (<=1kb)	SHANK2
cluster_1	chr11_71607031_71608558	12.4112769371102	6.33310547313912	3.60967144170944	3.15074731577389	0.904454638640082	Exon (ENST00000525262.2/ENST00000525262.2, exon 3 of 3)	KRTAP5-11
cluster_1	chr11_71813301_71814159	22.4406380216115	11.7083309365558	9.19903403123669	15.2633216042547	0.642339185873051	Promoter (<=1kb)	XNDC1N-ZNF705EP-ALG1L9P
cluster_1	chr11_720533_721250	18.930977956722	7.3155712205596	2.92310638133316	4.03449568549927	0.953847054194726	Promoter (<=1kb)	EPS8L2
cluster_1	chr11_72091189_72091733	12.6359782287899	9.68949504637581	3.21360176940785	5.41333388807037	0.633381846473142	Promoter (2-3kb)	LRRC51
cluster_1	chr11_72237970_72238799	24.9274435083616	11.4385344184387	5.72922051419535	4.71265367932715	0.9129291619029	Promoter (<=1kb)	INPPL1
cluster_1	chr11_72239471_72240245	14.1157450376549	9.94944072257811	6.02973085854946	4.59280710106284	0.722540763391145	Promoter (1-2kb)	INPPL1
cluster_1	chr11_72243982_72245215	21.9730567138311	10.952166286228	4.98561817993779	4.09823147131496	0.871921211494934	Promoter (<=1kb)	PHOX2A
cluster_1	chr11_72333591_72334219	14.4896329291732	5.53676005202712	1.46416564136829	1.53635281246846	0.925233444561067	Promoter (<=1kb)	CLPB
cluster_1	chr11_72417682_72418391	21.9326689141386	4.64517765962777	2.18568571562803	2.06127579615734	0.947415193108058	Intron (ENST00000294053.9/81570, intron 2 of 16)	CLPB
cluster_1	chr11_72534621_72535550	6.62346436778946	1.49311433025616	1.25783200408559	2.35582945039636	0.770666430182056	Promoter (<=1kb)	LOC105369376
cluster_1	chr11_725719_726885	17.6309359922077	9.60073151632838	3.42200223535664	4.85464631558224	0.834201240590531	Promoter (<=1kb)	EPS8L2
cluster_1	chr11_72584017_72585023	16.4304870437829	4.34009524802388	2.7565735410677	2.92573288548021	0.936392070840754	Promoter (<=1kb)	PDE2A-AS2
cluster_1	chr11_72589748_72590762	18.0590478866547	13.4644325587843	4.67507136991047	4.88560681688222	0.652711596785573	Promoter (<=1kb)	PDE2A
cluster_1	chr11_72676742_72677353	19.9144797661207	11.0490371601112	5.3097590014457	5.61407127587524	0.861851748141456	Promoter (2-3kb)	PDE2A
cluster_1	chr11_72705684_72706746	9.63503193440478	3.91500069372092	3.51760051931645	2.7837415527326	0.907297805240996	Promoter (2-3kb)	ARAP1
cluster_1	chr11_72751905_72752951	15.4342231936163	8.33136750064063	4.88528680100919	4.73155044373561	0.907266060468294	Promoter (<=1kb)	ARAP1
cluster_1	chr11_72764365_72765011	21.1020423843506	6.85067587256432	1.69536176860165	1.55496005482354	0.955544722507266	Intron (ENST00000359373.9/116985, intron 1 of 33)	STARD10
cluster_1	chr11_727783_728444	23.5762767246113	7.73802890546182	6.86007867358354	5.01090899224308	0.902957219425161	Promoter (1-2kb)	EPS8L2
cluster_1	chr11_72782345_72782862	10.5682419999521	5.10331912765427	1.93787814742874	7.52506911050171	0.539445736883123	Promoter (<=1kb)	STARD10
cluster_1	chr11_72787154_72787880	20.0593509034102	5.20158439606332	2.42406860658596	1.75200025368268	0.965410800531112	Promoter (1-2kb)	STARD10
cluster_1	chr11_73200179_73200931	11.3532856186142	10.4952278588092	3.13546452954636	3.62144152971752	0.521050698036651	Distal Intergenic	IUR1
cluster_1	chr11_73217814_73218954	25.2730982739522	17.7599926190335	7.95124646455565	7.56401249932328	0.710359743861348	Promoter (<=1kb)	P2RY2
cluster_1	chr11_73242091_73243052	15.7692387159383	9.33104058031894	4.02429941352649	5.16327023087424	0.820036663148542	3' UTR	P2RY6
cluster_1	chr11_73323387_73324162	11.8223475770794	8.13319467132819	2.86180463040553	4.92064564799813	0.700178793183677	Intron (ENST00000263674.4/9828, intron 1 of 20)	ARHGEF17
cluster_1	chr11_73361767_73362715	41.2360626156612	7.65667735507243	4.32400769548422	2.27633964567172	0.929464449514206	Promoter (1-2kb)	ARHGEF17
cluster_1	chr11_73645585_73646748	20.0156274283958	9.54401505159102	1.87432427365291	2.44172574305295	0.838302352004803	Promoter (<=1kb)	PLEKHB1
cluster_1	chr11_73647374_73647932	30.5773199954299	22.8620230821897	12.8669449315275	9.97608211418846	0.676680045424916	Promoter (<=1kb)	PLEKHB1
cluster_1	chr11_73660761_73661820	29.9193717326184	9.4846872728595	7.43935975369241	8.17824808797729	0.910199192809446	Promoter (<=1kb)	PLEKHB1
cluster_1	chr11_73950748_73951401	13.2390968919232	9.02009484880111	1.51713498536282	2.75529271169392	0.671530107029303	Promoter (<=1kb)	DNAJB13
cluster_1	chr11_74311198_74311988	16.1228180802651	7.47621399893459	5.77684831658931	5.48569563418073	0.969581145185663	Promoter (<=1kb)	P4HA3-AS1
cluster_1	chr11_743615_744569	32.907981703011	2.25171775279131	0.529158121565316	1.40148893838374	0.884301790046776	Promoter (2-3kb)	TALDO1
cluster_1	chr11_74388646_74389347	14.9273221195008	4.78698452589879	3.67419868004421	6.10574581689862	0.794035121034241	Intron (ENST00000298198.5/283209, intron 1 of 13)	PGM2L1
cluster_1	chr11_74466796_74468442	9.58213848343649	3.42844693243857	2.06269288858989	1.85952614753871	0.974396545357401	Promoter (<=1kb)	KCNE3
cluster_1	chr11_74730905_74731885	9.80436825996267	5.77944070568231	2.90583709358615	3.08657125350851	0.842649963757028	Promoter (<=1kb)	CHRDL2
cluster_1	chr11_74849350_74850222	12.1747325922594	3.88250352065406	0.984629360873168	2.26959731931707	0.936175093851933	Promoter (1-2kb)	XRRA1
cluster_1	chr11_74988442_74989501	24.0589841639796	13.3439991292663	7.32614561899268	12.7743127144786	0.766935480002187	Promoter (<=1kb)	NEU3
cluster_1	chr11_75214261_75214807	12.2884194133337	6.2439488754554	4.86911976631782	1.87218830958726	0.764283127772499	Promoter (<=1kb)	LOC105369388
cluster_1	chr11_75248473_75249103	14.4507885861719	5.1082726998402	7.2211683943403	8.12409598871956	0.632335632633806	Distal Intergenic	LOC105369388
cluster_1	chr11_75280149_75280675	21.5349219940074	5.23637996116849	6.21944467703113	9.61127252898942	0.699009156194147	Promoter (1-2kb)	ARRB1
cluster_1	chr11_75328510_75329225	17.577091275077	9.03363256942765	5.74160796476206	8.25417796956315	0.862888964706558	Intron (ENST00000420843.7/408, intron 1 of 15)	MIR326
cluster_1	chr11_75331223_75332136	35.1778872933738	2.8131903712819	0.592579938524156	0.487728360628547	0.90346077875579	Intron (ENST00000420843.7/408, intron 1 of 15)	MIR326
cluster_1	chr11_75388363_75389135	18.5725739921152	8.45959525012657	4.48480640055847	11.7569034942208	0.61763681866294	Distal Intergenic	RPS3
cluster_1	chr11_75425332_75425909	20.3472278712516	2.47479695320353	1.82954624346973	3.14222478772675	0.849442367345268	Promoter (<=1kb)	KLHL35
cluster_1	chr11_75462069_75462940	11.0960473174232	7.51261917368351	2.49277393691388	2.30850142952566	0.697990067499924	Exon (ENST00000527820.5/81544, exon 3 of 18)	GDPD5
cluster_1	chr11_75475289_75476018	14.1536790224029	11.658975363459	2.82055163099613	2.30155022974315	0.572512005333046	Promoter (1-2kb)	GDPD5
cluster_1	chr11_7548272_7549344	9.96628537866397	1.66295014646564	1.77757432054856	2.00543123169737	0.833919946429023	5' UTR	PPFIBP2
cluster_1	chr11_75495936_75496713	10.7942341732671	2.21717134744248	2.38133351211877	2.4991426143447	0.835399848362307	Intron (ENST00000336898.8/81544, intron 1 of 16)	GDPD5
cluster_1	chr11_75532071_75532666	14.9028485644804	7.20197685985859	5.02109205572796	9.15942229418442	0.679202421541894	Distal Intergenic	GDPD5
cluster_1	chr11_75561899_75563812	27.0844560247878	23.4299380649577	12.3634394390751	10.8295562419955	0.580694466485672	Promoter (<=1kb)	SERPINH1
cluster_1	chr11_7571644_7572356	19.249439313266	10.493237221313	10.1088707083175	7.03787130021242	0.816975829661056	Promoter (<=1kb)	LOC105376535
cluster_1	chr11_76152113_76152987	14.3421397700582	5.3802621936133	4.19284354250114	2.7208208062521	0.91465935338209	Distal Intergenic	UVRAG
cluster_1	chr11_762496_763630	11.6609673192546	1.62097908749446	2.01896275975253	2.96619272949932	0.78149838725331	Promoter (<=1kb)	TALDO1
cluster_1	chr11_76455267_76456129	18.7027876833846	16.2450397090404	2.82850428695711	2.25388640317595	0.540576608453871	Intron (ENST00000427574.6/56946, intron 5 of 9)	EMSY
cluster_1	chr11_76698198_76699247	8.51178379162981	3.0149358493724	2.64366041090628	1.70496734610079	0.895132808630731	Intron (ENST00000533588.1/ENST00000533588.1, intron 2 of 2)	GUCY2EP
cluster_1	chr11_76704091_76704716	16.6089198041568	2.53669084860287	1.65149019506321	1.18095648436421	0.906618580188571	Promoter (<=1kb)	GUCY2EP
cluster_1	chr11_7673051_7674584	21.0168028818548	7.45752013669434	7.8948791510661	4.27006983340578	0.827505770061549	Promoter (<=1kb)	CYB5R2
cluster_1	chr11_76758984_76759643	8.06120769252043	1.93292298577688	1.28083427395886	1.68893673200774	0.900533015735068	Distal Intergenic	TSKU
cluster_1	chr11_77091027_77091628	16.2199787239259	7.17564100003989	3.69126209582483	5.06010762894057	0.935950205337314	Intron (ENST00000531028.2/726, intron 2 of 13)	CAPN5
cluster_1	chr11_77140117_77140798	10.7168975106745	5.93756563817106	3.41179531154935	1.93879917401304	0.800561283369785	Promoter (1-2kb)	MYO7A
cluster_1	chr11_77147556_77148539	22.0059670885208	14.103959811791	8.31499992138919	2.73249239278932	0.672534879186311	Exon (ENST00000409709.9/4647, exon 4 of 49)	MYO7A
cluster_1	chr11_77175699_77176276	19.4762191685355	6.17591429790794	4.99030364907224	3.16031499612844	0.912677570074134	Promoter (<=1kb)	MYO7A
cluster_1	chr11_77191855_77192447	19.0857416738491	2.73545231982556	3.06702739325449	1.51928204530823	0.859847548135591	Exon (ENST00000409709.9/4647, exon 31 of 49)	MYO7A
cluster_1	chr11_77547567_77548687	10.4007253611295	3.64082294370431	2.64195060933507	2.91300923750562	0.936692032626963	Intron (ENST00000526761.5/1207, intron 4 of 5)	AQP11
cluster_1	chr11_78022339_78023607	18.6163800202912	5.52392485170012	3.73445329006273	3.44749993892374	0.946651177889006	Promoter (<=1kb)	KCTD14
cluster_1	chr11_78051303_78051953	9.11095250170463	1.60024376969217	1.56760689864321	0.579347319053284	0.874465175972995	Intron (ENST00000528251.1/100532726, intron 1 of 1)	KCTD14
cluster_1	chr11_783196_784043	29.4118625944389	9.52114985874479	6.4916211632146	11.5724930781535	0.807544765283201	Exon (ENST00000530083.3/171391, exon 2 of 2)	GATD1-DT
cluster_1	chr11_78365162_78365843	16.9783689038896	11.342004348896	2.39820176578864	3.97090552136831	0.690942725876694	Intron (ENST00000534168.1/ENST00000534168.1, intron 1 of 1)	GAB2
cluster_1	chr11_78594732_78595678	11.5910400491901	1.36507260050709	1.65400294840098	1.42596426022793	0.84087987538589	Distal Intergenic	NARS2
cluster_1	chr11_78940382_78940990	13.619906600443	10.2842194157373	6.59142980956106	4.07314110038574	0.641702040204697	Intron (ENST00000278550.12/26011, intron 6 of 33)	TENM4
cluster_1	chr11_790650_791330	18.6132373505326	9.95762111918831	5.3728137818849	10.0987304197114	0.743530210013904	Promoter (<=1kb)	CEND1
cluster_1	chr11_79485621_79486688	10.9176660361393	2.41446555287763	1.79044526221707	2.62659050637519	0.862115457890799	Distal Intergenic	TENM4
cluster_1	chr11_79493420_79494096	16.1293486390959	4.10695158965875	4.23167824354335	2.88063843566952	0.866717454222401	Distal Intergenic	TENM4
cluster_1	chr11_8218861_8219709	11.8134925249085	2.86263178431397	1.48894732537815	3.40390522676036	0.837156338989221	Distal Intergenic	LMO1
cluster_1	chr11_827151_828001	25.1543937770826	18.7285914473908	6.38540601369963	8.51779052570609	0.659387906547889	Promoter (<=1kb)	CRACR2B
cluster_1	chr11_829890_830610	45.5237910364762	21.5583245770134	14.0383385054164	23.3484889741941	0.785433108575262	Promoter (<=1kb)	CRACR2B
cluster_1	chr11_83587570_83588314	15.8970361932185	6.73572985126379	4.50475053013323	2.02712006585457	0.863838473038636	Intron (ENST00000280241.12/1740, intron 13 of 21)	DLG2-AS2
cluster_1	chr11_83723946_83725494	11.0554419612535	4.0863626409974	2.97700448862252	2.29572897577985	0.945288808824961	Promoter (<=1kb)	DLG2
cluster_1	chr11_84233938_84234956	6.32525830523766	2.45279930832437	1.13518400535828	1.5230804365435	0.95896171310522	Intron (ENST00000280241.12/1740, intron 2 of 21)	DLG2
cluster_1	chr11_843817_845171	34.956088683739	14.3792323025997	7.05676335947719	7.81062986264009	0.964969055019849	Promoter (<=1kb)	TSPAN4
cluster_1	chr11_84437025_84438247	19.7437814683341	6.22164010224833	7.68862339241263	5.93445659302905	0.801855463553383	Promoter (<=1kb)	DLG2
cluster_1	chr11_84719797_84721381	19.4621825988774	10.7820334309988	11.1619560686029	6.52522063928061	0.728551464819391	Promoter (<=1kb)	DLG2
cluster_1	chr11_850422_851110	20.2512709023657	8.68878335174107	4.67243187476192	9.84445728908212	0.75823308651287	Promoter (<=1kb)	TSPAN4
cluster_1	chr11_86202256_86203293	9.7453830857471	2.33540241302877	4.43280143424878	3.76122622494857	0.659832148640901	Distal Intergenic	LINC02695
cluster_1	chr11_86571385_86572036	17.1513995866627	3.97792523609304	2.67986858164104	2.80994917990596	0.918564570252433	Intron (ENST00000524610.1/ENST00000524610.1, intron 2 of 2)	ME3
cluster_1	chr11_86923962_86924755	16.0081572719301	2.64589273366575	1.92170414562872	1.86991923601965	0.894123955446816	Promoter (<=1kb)	LOC107984428
cluster_1	chr11_8698694_8699420	20.9048705120902	3.7987085725589	1.06811799034301	3.02351069622844	0.905628175657989	Promoter (<=1kb)	DENND2B
cluster_1	chr11_8700973_8701658	14.3608808216916	2.70401359732636	2.74790670092923	3.0528133371058	0.842023640050989	Promoter (<=1kb)	DENND2B
cluster_1	chr11_87623286_87624183	12.1376897060867	5.54316419442064	3.38500586492236	2.0279219612976	0.883229712759671	Distal Intergenic	LINC02711
cluster_1	chr11_877535_878210	19.6252625178099	1.29051159297296	3.20680716592491	3.64594855136074	0.764091142798914	Intron (ENST00000323578.13/66005, intron 10 of 12)	CHID1
cluster_1	chr11_88103383_88104197	17.6632735941542	3.27722543694569	1.41529867942716	2.2844215573282	0.917518165623459	Intron (ENST00000528458.1/ENST00000528458.1, intron 1 of 2)	RAB38
cluster_1	chr11_88300974_88301830	20.0844965882284	3.2463235041066	1.02084398532952	2.71864988445571	0.898022707928289	Intron (ENST00000678554.1/1075, intron 4 of 7)	CTSC
cluster_1	chr11_88307969_88309067	29.6617378344088	1.43479023503502	0.986186001503433	1.25821766770186	0.862929863010139	Promoter (<=1kb)	CTSC
cluster_1	chr11_8839606_8840851	10.1795793764902	6.81748193350276	3.89697909027701	2.692253907904	0.730127268870295	Intron (ENST00000534127.5/6764, intron 2 of 22)	DENND2B
cluster_1	chr11_88508357_88509691	19.1912756559994	9.12748507850165	9.81831525858036	4.03982766774081	0.710006013964999	Promoter (2-3kb)	GRM5-AS1
[truncated: 16,429 more rows]
