# Supplementary material for: Epigenetic insights into GABAergic development in Dravet Syndrome iPSC and therapeutic implications
Source: eLife. 2024 Aug 27;12:RP92599. doi: 10.7554/eLife.92599 (PMC11349296; doi:10.7554/eLife.92599)
Supplement: Supplementary file 2. — Source data for Figure 1F. [file elife-92599-supp2.xlsx]

## Sheet: kegg.list_of_genes_in_cluster_1
ID	Description	GeneRatio	BgRatio	pvalue	p.adjust	qvalue	geneID
hsa04360	Axon guidance	48/699	182/8521	1.15E-13	3.76E-11	2.57E-11	EFNA3/EPHA2/PRKCZ/PLXNA2/WNT4/ABLIM1/NRP1/CXCL12/ROBO3/PTPN11/WNT5B/SRGAP1/SEMA6D/SEMA4B/RGMA/PIK3R2/CXCR4/EPHA4/DPYSL5/SRC/PARD6B/BMP7/BOC/SEMA5B/PLXNA1/EPHB1/PIK3CB/EPHB3/RHOA/ROBO2/ROBO1/CAMK2D/ABLIM2/BMPR1B/UNC5C/EFNA5/CAMK2A/SLIT3/PIK3R1/FYN/PLXNA4/DPYSL2/RGS3/NTNG2/SEMA4D/PTCH1/PLXNA3/EFNB1
hsa04015	Rap1 signaling pathway	48/699	210/8521	3.26E-11	5.31E-09	3.64E-09	EFNA3/EPHA2/RASSF5/PRKCZ/SIPA1L2/LPAR3/FGFR2/PLCE1/IGF1/GRIN2B/RAPGEF3/EVL/PRKD1/SIPA1L1/CALM1/TLN2/IGF1R/PRKCB/GNAO1/BCAR1/MAP2K6/PIK3R2/AKT2/RAPGEF4/ADCY3/SRC/PARD6B/GNAS/PLCB4/TIAM1/ADCY5/PIK3CB/CTNNB1/RHOA/MAGI1/PDGFC/RAPGEF2/FGFR3/EFNA5/RAPGEF6/ARAP3/FYB1/PIK3R1/RAPGEF5/MAGI2/RAPGEF1/VAV2/GNAQ
hsa04925	Aldosterone synthesis and secretion	27/699	98/8521	1.09E-08	1.18E-06	8.08E-07	ATP1B1/ATP2B4/CAMK1G/SCARB1/CACNA1C/ITPR2/NR4A1/PRKD1/CALM1/CACNA1H/PRKCB/CACNA1G/PRKACA/ATP1A3/CREB1/ADCY3/PRKCE/GNAS/PLCB4/CACNA1I/ADCY5/ITPR1/CAMK2D/CAMK4/CAMK2A/CREB5/GNAQ
hsa04024	cAMP signaling pathway	44/699	225/8521	3.68E-08	3.00E-06	2.06E-06	ATP1B1/ATP2B4/EDN2/PDE4B/PLCE1/CHRM1/ATP2A2/GRIN2B/CACNA1C/RAPGEF3/ABCC4/NFKBIA/FOS/CALM1/SOX9/GRIN2C/NFATC1/PDE4A/PRKACA/PIK3R2/AKT2/ATP1A3/RAPGEF4/CREB1/ADCY3/LHCGR/CNGA3/GNAS/TIAM1/ADCY5/PIK3CB/RHOA/NFKB1/CAMK2D/CAMK4/ARAP3/CAMK2A/PDE4D/PIK3R1/CREB5/GLI3/VAV2/PTCH1/GABBR2
hsa04713	Circadian entrainment	25/699	97/8521	1.60E-07	1.04E-05	7.13E-06	KCNJ9/NOS1AP/NOS1/GRIN2B/CACNA1C/FOS/CALM1/GNB5/CACNA1H/PRKCB/GNAO1/CACNA1G/GRIN2C/PRKACA/CREB1/ADCY3/GNAS/PLCB4/CACNA1I/ADCY5/ITPR1/CAMK2D/GUCY1B1/CAMK2A/GNAQ
hsa04310	Wnt signaling pathway	35/699	171/8521	2.99E-07	1.62E-05	1.11E-05	WNT4/TCF7L2/LRP6/WNT5B/PRICKLE1/DAAM1/CCDC88C/TLE3/PRKCB/SIAH1/NKD1/AXIN2/TP53/NFATC1/PRKACA/PLCB4/ZNRF3/WNT7B/SENP2/CTNNB1/RHOA/PRICKLE2/DKK2/CAMK2D/CTBP1/CTNND2/CSNK1A1/CAMK2A/DAAM2/MYC/INVS/TLE4/TLE1/ROR2/GPC4
hsa04725	Cholinergic synapse	26/699	113/8521	9.99E-07	4.65E-05	3.19E-05	KCNQ1/CHRM1/CACNA1C/ITPR2/FOS/GNB5/PRKCB/GNAO1/BCL2/PRKACA/PIK3R2/AKT2/CREB1/ADCY3/PLCB4/ADCY5/PIK3CB/ITPR1/CAMK2D/CAMK4/CAMK2A/PIK3R1/FYN/CREB5/KCNQ3/GNAQ
hsa04919	Thyroid hormone signaling pathway	27/699	121/8521	1.18E-06	4.81E-05	3.29E-05	RXRG/ATP1B1/WNT4/PFKP/PLCE1/ATP2A2/MED13L/TBC1D4/MYH7/PRKCB/THRA/TP53/PRKACA/PIK3R2/AKT2/ATP1A3/SRC/PLCB4/RCAN1/PIK3CB/THRB/CTNNB1/PIK3R1/RHEB/MYC/NCOA2/RXRA
hsa04971	Gastric acid secretion	20/699	76/8521	1.95E-06	7.05E-05	4.83E-05	ATP1B1/KCNQ1/ITPR2/KCNK10/CALM1/PRKCB/GAST/PRKACA/ATP1A3/SLC9A4/ADCY3/GNAS/PLCB4/ADCY5/MYLK/ITPR1/CAMK2D/CAMK2A/SLC26A7/GNAQ
hsa04750	Inflammatory mediator regulation of TRP channels	23/699	98/8521	2.92E-06	8.68E-05	5.94E-05	IGF1/ITPR2/ASIC1/HTR2A/PRKCH/CALM1/PRKCB/MAP2K6/PRKACA/PIK3R2/ADCY3/PRKCE/SRC/GNAS/PLCB4/ADCY5/PIK3CB/ITPR1/CAMK2D/CAMK2A/PIK3R1/F2RL1/GNAQ
hsa04020	Calcium signaling pathway	43/699	253/8521	2.93E-06	8.68E-05	5.94E-05	CACNA1E/ATP2B4/CAMK1G/FGFR2/PLCE1/STIM1/CHRM1/ATP2A2/NOS1/GRIN2B/CACNA1C/ITPR2/HTR2A/CALM1/NTRK3/CACNA1H/PRKCB/CACNA1G/GRIN2C/NFATC1/PRKACA/SLC8A2/CXCR4/PDE1A/ADCY3/LHCGR/GNAS/NTSR1/PLCB4/CACNA1I/MYLK/ITPR1/CAMK2D/PDGFC/FGFR3/CCKAR/CAMK4/CAMK2A/TFEB/PDE1C/PTK2B/GNAQ/NTRK2
hsa04928	Parathyroid hormone synthesis, secretion and action	24/699	106/8521	3.52E-06	9.56E-05	6.54E-05	MEF2D/RXRG/PDE4B/LRP6/ITPR2/FOS/AKAP13/PRKCB/ARRB2/BCL2/PDE4A/PRKACA/CREB1/ADCY3/GNAS/PLCB4/ADCY5/ITPR1/RHOA/PDE4D/MEF2C/CREB5/RXRA/GNAQ
hsa04261	Adrenergic signaling in cardiomyocytes	30/699	154/8521	6.08E-06	0.000141529	9.69E-05	ATP1B1/ATP2B4/CACNB2/KCNQ1/ATP2A2/CACNA1C/RAPGEF3/MYH7/CALM1/CACNG5/BCL2/PRKACA/AKT2/ATP1A3/SLC8A2/CACNB4/RAPGEF4/CREB1/ADCY3/GNAS/PLCB4/CACNG2/ADCY5/CAMK2D/PPP2R2C/PPP2R2B/CAMK2A/CREB5/CACNA2D1/GNAQ
hsa04921	Oxytocin signaling pathway	30/699	154/8521	6.08E-06	0.000141529	9.69E-05	KCNJ9/CAMK1G/CACNB2/CACNA1C/ITPR2/FOS/CALM1/PRKCB/GNAO1/CACNG5/NFATC1/PRKACA/CACNB4/ADCY3/SRC/GNAS/PLCB4/RCAN1/CACNG2/ADCY5/MYLK/ITPR1/RHOA/CAMK2D/GUCY1B1/CAMK4/CAMK2A/MEF2C/CACNA2D1/GNAQ
hsa04929	GnRH secretion	17/699	64/8521	9.96E-06	0.000216511	0.000148209	KCNN3/KCNJ9/CACNA1C/ITPR2/CACNA1H/PRKCB/ARRB2/CACNA1G/PIK3R2/AKT2/PLCB4/CACNA1I/PIK3CB/ITPR1/PIK3R1/GNAQ/GABBR2
hsa04927	Cortisol synthesis and secretion	17/699	65/8521	1.25E-05	0.000254244	0.000174039	PBX1/SCARB1/CACNA1C/ITPR2/NR4A1/CACNA1H/CACNA1G/PRKACA/CREB1/ADCY3/GNAS/PLCB4/CACNA1I/ADCY5/ITPR1/CREB5/GNAQ
hsa04911	Insulin secretion	20/699	86/8521	1.49E-05	0.000285717	0.000195583	KCNN3/ATP1B1/KCNMA1/CACNA1C/PRKCB/PRKACA/ATP1A3/RAPGEF4/CREB1/ADCY3/GNAS/PLCB4/ADCY5/KCNMB2/CAMK2D/CCKAR/CAMK2A/CREB5/GCK/GNAQ
hsa04915	Estrogen signaling pathway	26/699	137/8521	4.03E-05	0.00073013	0.000499798	KCNJ9/ITPR2/FOS/CALM1/SHC4/GNAO1/RARA/BCL2/PRKACA/PIK3R2/AKT2/CREB1/ADCY3/SRC/GNAS/PLCB4/ADCY5/PIK3CB/ITPR1/PIK3R1/FKBP5/CREB5/NCOA2/GNAQ/SHC3/GABBR2
hsa04022	cGMP-PKG signaling pathway	29/699	167/8521	8.12E-05	0.001392608	0.000953287	MEF2D/ATP1B1/ATP2B4/OPRD1/KCNMA1/ATP2A2/CACNA1C/ITPR2/MYH7/CALM1/NFATC1/AKT2/ATP1A3/SLC8A2/CREB1/ADCY3/PRKCE/PLCB4/ADCY5/MYLK/KCNMB2/ITPR1/RHOA/GUCY1B1/MEF2C/CREB5/GTF2IRD1/GTF2I/GNAQ
hsa04550	Signaling pathways regulating pluripotency of stem cells	26/699	143/8521	8.58E-05	0.001397959	0.00095695	WNT4/FGFR2/NODAL/PCGF5/IGF1/WNT5B/ACVR1B/ESRRB/IGF1R/ZFHX3/AXIN2/SMAD2/PIK3R2/AKT2/ACVR1/MEIS1/WNT7B/PIK3CB/CTNNB1/FGFR3/BMPR1B/LIFR/PIK3R1/JARID2/MYC/KAT6A
hsa04924	Renin secretion	16/699	69/8521	0.000109248	0.001557171	0.001065935	REN/EDN2/KCNMA1/CACNA1C/ITPR2/CALM1/PRKACA/PDE1A/CREB1/GNAS/PLCB4/ADCY5/ITPR1/GUCY1B1/PDE1C/GNAQ
hsa04926	Relaxin signaling pathway	24/699	129/8521	0.00010965	0.001557171	0.001065935	PRKCZ/NOS1/NFKBIA/FOS/SHC4/GNB5/GNAO1/ARRB2/SMAD2/PRKACA/PIK3R2/AKT2/CREB1/COL4A4/ADCY3/SRC/GNAS/PLCB4/ADCY5/PIK3CB/NFKB1/PIK3R1/CREB5/SHC3
hsa05135	Yersinia infection	25/699	137/8521	0.000109862	0.001557171	0.001065935	NFKBIA/FOS/BCAR1/MAP2K6/BAIAP2/NFATC1/PIK3R2/PIP5K1C/AKT2/ARPC2/SRC/TAB1/PIK3CB/RHOA/NFKB1/FYB1/PIK3R1/TAB2/ACTR3B/WIPF3/ELMO1/PTK2B/VAV2/PIP5K1B/GNAQ
hsa04340	Hedgehog signaling pathway	14/699	56/8521	0.000123451	0.001676882	0.001147882	HHAT/CDON/SCUBE2/ARRB2/BCL2/PRKACA/MEGF8/CUL3/BOC/CSNK1G3/CSNK1A1/GLI3/GAS1/PTCH1
hsa04724	Glutamatergic synapse	22/699	115/8521	0.000137578	0.001794011	0.00122806	SLC1A7/GRIK4/SHANK2/SLC17A8/GRIN2B/CACNA1C/ITPR2/SLC38A1/GNB5/PRKCB/GNAO1/GRIN2C/DLGAP1/PRKACA/GLS/ADCY3/GNAS/PLCB4/ADCY5/ITPR1/SLC1A3/GNAQ
hsa04072	Phospholipase D signaling pathway	26/699	148/8521	0.000154213	0.001919153	0.001313724	PLPP3/LPAR3/GAB2/PTPN11/RAPGEF3/SHC4/PIK3R2/PIP5K1C/AKT2/RAPGEF4/DGKD/ADCY3/GNAS/PLCB4/ADCY5/PIK3CB/RHOA/PDGFC/PIK3R1/FYN/AGPAT4/DGKB/RHEB/PTK2B/PIP5K1B/SHC3
hsa04728	Dopaminergic synapse	24/699	132/8521	0.000158948	0.001919153	0.001313724	KCNJ9/GRIN2B/CACNA1C/ITPR2/FOS/CALM1/GNB5/PRKCB/GNAO1/ARRB2/PRKACA/AKT2/KIF5C/CREB1/GNAS/PLCB4/ADCY5/ITPR1/CAMK2D/PPP2R2C/PPP2R2B/CAMK2A/CREB5/GNAQ
hsa04935	Growth hormone synthesis, secretion and action	22/699	120/8521	0.000260914	0.003037779	0.002079461	IGF1/CACNA1C/ITPR2/FOS/SHC4/PRKCB/BCAR1/MAP2K6/PRKACA/PIK3R2/AKT2/CREB1/ADCY3/GNAS/PLCB4/ADCY5/PIK3CB/ITPR1/PIK3R1/CREB5/GNAQ/SHC3
hsa05214	Glioma	16/699	75/8521	0.000306794	0.003448792	0.002360813	CAMK1G/IGF1/CALM1/SHC4/IGF1R/PRKCB/TP53/PIK3R2/AKT2/PIK3CB/CAMK2D/CAMK4/CAMK2A/PIK3R1/CDK6/SHC3
hsa04934	Cushing syndrome	26/699	155/8521	0.000330552	0.003591993	0.002458839	PBX1/WNT4/TCF7L2/SCARB1/WNT5B/CACNA1C/ITPR2/NR4A1/CACNA1H/CACNA1G/AXIN2/PRKACA/CREB1/ADCY3/GNAS/PLCB4/CACNA1I/WNT7B/ADCY5/CTNNB1/ITPR1/CAMK2D/CAMK2A/CREB5/CDK6/GNAQ
hsa05163	Human cytomegalovirus infection	34/699	225/8521	0.00034206	0.00359715	0.00246237	CXCL12/ITPR2/NFKBIA/CALM1/GNB5/AKAP13/PRKCB/GNAO1/BCAR1/MAP2K6/TP53/NFATC1/PRKACA/PIK3R2/AKT2/CXCR4/CREB1/ADCY3/SRC/GNAS/PLCB4/ADCY5/PIK3CB/CTNNB1/ITPR1/RHOA/NFKB1/PIK3R1/RHEB/CREB5/CDK6/MYC/PTK2B/GNAQ
hsa05031	Amphetamine addiction	15/699	69/8521	0.000378726	0.00381343	0.00261042	GRIN2B/CACNA1C/FOS/CALM1/PRKCB/GRIN2C/PRKACA/CREB1/GNAS/ADCY5/CAMK2D/CAMK4/CAMK2A/CREB5/ARC
hsa04390	Hippo signaling pathway	26/699	157/8521	0.000406185	0.00381343	0.00261042	CRB1/PRKCZ/WNT4/TCF7L2/TEAD1/DLG2/WNT5B/FRMD6/NKD1/AXIN2/SMAD2/SMAD7/BBC3/PARD6B/BMP7/WNT7B/WWTR1/CTNNB1/LIMD1/PPP2R2C/BMPR1B/CTNNA1/PPP2R2B/YWHAZ/MYC/STK3
hsa05100	Bacterial invasion of epithelial cells	16/699	77/8521	0.00042026	0.00381343	0.00261042	MAD2L2/VCL/SHC4/BCAR1/PIK3R2/ARPC2/SRC/PIK3CB/CTNNB1/RHOA/SEPTIN11/CTNNA1/PIK3R1/ACTR3B/ELMO1/SHC3
hsa04010	MAPK signaling pathway	42/699	301/8521	0.00042099	0.00381343	0.00261042	EFNA3/EPHA2/CACNA1E/DUSP10/FGFR2/CACNB2/IGF1/CACNA1C/NR4A1/FOS/IGF1R/CACNA1H/PRKCB/ARRB2/CACNA1G/CACNG5/MAP2K6/TP53/NFATC1/PRKACA/AKT2/MAP4K4/CACNB4/MAP3K20/MAP4K3/CACNG2/TAB1/CACNA1I/MAP3K13/NFKB1/PDGFC/RAPGEF2/FGFR3/EFNA5/MEF2C/TAB2/MAP3K4/HSPB1/CACNA2D1/MYC/STK3/NTRK2
hsa04611	Platelet activation	22/699	124/8521	0.000421115	0.00381343	0.00261042	PRKCZ/STIM1/ITPR2/TLN2/PRKACA/PIK3R2/AKT2/ADCY3/SRC/GNAS/PLCB4/ADCY5/MYLK/PIK3CB/GP5/ITPR1/RHOA/GUCY1B1/PIK3R1/FYN/TBXAS1/GNAQ
hsa04514	Cell adhesion molecules	26/699	158/8521	0.000449421	0.003959761	0.002710589	NFASC/CNTN2/SDC3/PTPRF/NCAM1/CADM1/JAM3/CD6/NRXN2/NRXN3/CD276/CDH2/PTPRM/LRRC4B/PTPRS/ICOS/CDH4/IGSF11/NLGN1/VCAN/CNTNAP2/ITGB8/CLDN23/NTNG2/PTPRD/CD40LG
hsa04916	Melanogenesis	19/699	101/8521	0.00048152	0.004130935	0.002827763	WNT4/TCF7L2/WNT5B/DCT/CALM1/PRKCB/GNAO1/PRKACA/CREB1/ADCY3/GNAS/PLCB4/WNT7B/ADCY5/CTNNB1/MITF/CAMK2D/CAMK2A/GNAQ
hsa04962	Vasopressin-regulated water reabsorption	11/699	44/8521	0.000650307	0.005435896	0.003721052	DYNC1H1/STX4/PRKACA/DYNC1I2/CREB1/ADCY3/DCTN1/GNAS/DCTN4/CREB5/DYNC1I1
hsa04071	Sphingolipid signaling pathway	21/699	121/8521	0.000762907	0.006217694	0.004256219	S1PR1/PRKCZ/OPRD1/GAB2/PRKCB/TP53/BCL2/PIK3R2/CERS1/AKT2/PRKCE/PLCB4/PIK3CB/RHOA/NFKB1/PPP2R2C/PPP2R2B/PIK3R1/FYN/NSMAF/GNAQ
hsa04211	Longevity regulating pathway	17/699	89/8521	0.000784633	0.006238788	0.004270659	IGF1/IGF1R/TP53/RPTOR/PRKACA/PIK3R2/AKT2/CREB1/ADCY3/ADCY5/PIK3CB/NFKB1/PPARGC1A/CAMK4/PIK3R1/RHEB/CREB5
hsa04720	Long-term potentiation	14/699	67/8521	0.000894223	0.006940871	0.004751258	GRIN2B/CACNA1C/ITPR2/RAPGEF3/CALM1/PRKCB/GRIN2C/PRKACA/PLCB4/ITPR1/CAMK2D/CAMK4/CAMK2A/GNAQ
hsa04918	Thyroid hormone synthesis	15/699	75/8521	0.000959929	0.0072776	0.00498176	ATP1B1/ITPR2/PRKCB/PRKACA/ATP1A3/CREB1/ADCY3/GNAS/PLCB4/ADCY5/ITPR1/IYD/CREB5/TG/GNAQ
hsa04670	Leukocyte transendothelial migration	20/699	115/8521	0.000983062	0.007283596	0.004985865	RASSF5/CXCL12/VCL/THY1/JAM3/PTPN11/RAPGEF3/PRKCB/BCAR1/PIK3R2/CXCR4/RAPGEF4/PIK3CB/CTNNB1/RHOA/CTNNA1/PIK3R1/PTK2B/CLDN23/VAV2
hsa05032	Morphine addiction	17/699	91/8521	0.001019118	0.007382945	0.005053873	KCNJ9/PDE4B/GABRA5/GABRG3/GNB5/PRKCB/GNAO1/ARRB2/PDE4A/PRKACA/PDE1A/ADCY3/GNAS/ADCY5/PDE4D/PDE1C/GABBR2
hsa05017	Spinocerebellar ataxia	23/699	143/8521	0.001293678	0.009091222	0.006223245	DAB1/ATP2A2/GRIN2B/ITPR2/TBPL2/PRKCB/GRIN2C/PIK3R2/AKT2/CIC/PSMD14/PUM2/PLCB4/PIK3CB/ITPR1/RBPJ/PIK3R1/ATXN1/PSMB1/PSMC2/SEM1/PSMB7/GNAQ
hsa04912	GnRH signaling pathway	17/699	93/8521	0.001310698	0.009091222	0.006223245	CACNA1C/ITPR2/CALM1/PRKCB/MAP2K6/PRKACA/ADCY3/SRC/GNAS/PLCB4/ADCY5/ITPR1/CAMK2D/CAMK2A/MAP3K4/PTK2B/GNAQ
hsa04972	Pancreatic secretion	18/699	102/8521	0.001457202	0.009896828	0.00677471	ATP1B1/ATP2B4/KCNMA1/KCNQ1/ATP2A2/ITPR2/PRKCB/RAB27B/ATP1A3/ADCY3/GNAS/PLCB4/ADCY5/ITPR1/RHOA/CCKAR/SLC4A4/GNAQ
hsa01521	EGFR tyrosine kinase inhibitor resistance	15/699	79/8521	0.001669743	0.011108904	0.007604416	FGFR2/IGF1/SHC4/IGF1R/PRKCB/BCL2/PIK3R2/AKT2/SRC/PIK3CB/PDGFC/FGFR3/NRG2/PIK3R1/SHC3
hsa04062	Chemokine signaling pathway	28/699	192/8521	0.001922194	0.012532703	0.008579054	PRKCZ/CXCL12/NFKBIA/SHC4/GNB5/PRKCB/BCAR1/CCR7/ARRB2/PRKACA/PIK3R2/AKT2/CXCR4/ADCY3/SRC/PREX1/PLCB4/TIAM1/ADCY5/PIK3CB/RHOA/NFKB1/PIK3R1/ELMO1/PTK2B/VAV2/GNAQ/SHC3
hsa05215	Prostate cancer	17/699	97/8521	0.002108743	0.013479415	0.00922711	TCF7L2/FGFR2/IGF1/NFKBIA/IGF1R/TP53/BCL2/PIK3R2/AKT2/CREB1/PIK3CB/ETV5/CTNNB1/NFKB1/PDGFC/PIK3R1/CREB5
hsa04727	GABAergic synapse	16/699	89/8521	0.002151523	0.013488397	0.009233258	SLC6A12/CACNA1C/SLC38A1/GABRA5/GABRG3/GNB5/PRKCB/GNAO1/GABARAPL2/PRKACA/GLS/ADCY3/SRC/SLC6A1/ADCY5/GABBR2
hsa04510	Focal adhesion	29/699	203/8521	0.002212124	0.013606649	0.009314206	CAPN2/VCL/IGF1/SHC4/TLN2/IGF1R/PRKCB/BCAR1/LAMA3/BCL2/LAMA1/PIK3R2/PIP5K1C/AKT2/COL4A4/SRC/COL6A1/MYLK/PIK3CB/CTNNB1/RHOA/PDGFC/PIK3R1/FYN/ITGB8/RAPGEF1/VAV2/PIP5K1B/SHC3
hsa05225	Hepatocellular carcinoma	25/699	168/8521	0.002488093	0.015020712	0.010282179	WNT4/ARID1A/GSTO2/TCF7L2/LRP6/WNT5B/SHC4/IGF1R/PRKCB/AXIN2/TP53/SMAD2/PIK3R2/DPF1/AKT2/WNT7B/PIK3CB/CTNNB1/CSNK1A1/PIK3R1/ARID1B/CDK6/MYC/SMARCA2/SHC3
hsa04270	Vascular smooth muscle contraction	21/699	134/8521	0.002854512	0.016919469	0.011581942	EDN2/KCNMA1/CACNA1C/ITPR2/PRKCH/CALM1/PRKCB/PRKACA/RAMP1/ADCY3/PRKCE/GNAS/PLCB4/ADCY5/MYLK/KCNMB2/ITPR1/RHOA/GUCY1B1/CALD1/GNAQ
hsa04730	Long-term depression	12/699	60/8521	0.003016152	0.017456622	0.011949641	IGF1/NOS1/ITPR2/IGF1R/PRKCB/GNAO1/GNAS/PLCB4/ITPR1/GUCY1B1/GRID2/GNAQ
hsa05222	Small cell lung cancer	16/699	92/8521	0.003052231	0.017456622	0.011949641	RXRG/NFKBIA/TP53/LAMA3/BCL2/LAMA1/PIK3R2/AKT2/COL4A4/PIK3CB/NFKB1/PIK3R1/CDK6/MYC/TRAF1/RXRA
hsa05220	Chronic myeloid leukemia	14/699	76/8521	0.003157442	0.017747004	0.012148418	GAB2/PTPN11/NFKBIA/SHC4/TP53/PIK3R2/AKT2/PIK3CB/NFKB1/CTBP1/PIK3R1/CDK6/MYC/SHC3
hsa04970	Salivary secretion	16/699	93/8521	0.003414109	0.018864396	0.01291331	ATP1B1/ATP2B4/KCNMA1/NOS1/ITPR2/CALM1/PRKCB/PRKACA/ATP1A3/ADCY3/GNAS/PLCB4/ADCY5/ITPR1/GUCY1B1/GNAQ
hsa04930	Type II diabetes mellitus	10/699	46/8521	0.003494122	0.018870375	0.012917402	CACNA1E/PRKCZ/CACNA1C/PKM/CACNA1G/PIK3R2/PRKCE/PIK3CB/PIK3R1/GCK
hsa05412	Arrhythmogenic right ventricular cardiomyopathy	14/699	77/8521	0.003576029	0.018870375	0.012917402	TCF7L2/CACNB2/ATP2A2/CACNA1C/CACNG5/CDH2/LAMA1/SLC8A2/CACNB4/CACNG2/CTNNB1/CTNNA1/ITGB8/CACNA2D1
hsa04722	Neurotrophin signaling pathway	19/699	119/8521	0.003588844	0.018870375	0.012917402	PTPN11/NFKBIA/CALM1/SHC4/NTRK3/TP53/BCL2/PIK3R2/AKT2/PIK3CB/RHOA/NFKB1/CAMK2D/CAMK4/CAMK2A/PIK3R1/RAPGEF1/NTRK2/SHC3
hsa05230	Central carbon metabolism in cancer	13/699	70/8521	0.004065593	0.021037833	0.0144011	FGFR2/PFKP/PKM/NTRK3/TP53/PIK3R2/AKT2/GLS/PIK3CB/FGFR3/PIK3R1/GCK/MYC
hsa05414	Dilated cardiomyopathy	16/699	96/8521	0.004717271	0.024028597	0.016448377	CACNB2/IGF1/ATP2A2/CACNA1C/MYH7/CACNG5/LAMA1/PRKACA/SLC8A2/CACNB4/ADCY3/GNAS/CACNG2/ADCY5/ITGB8/CACNA2D1
hsa05226	Gastric cancer	22/699	149/8521	0.004835194	0.02425036	0.016600182	RXRG/WNT4/TCF7L2/FGFR2/LRP6/WNT5B/SHC4/AXIN2/TP53/SMAD2/BCL2/PIK3R2/AKT2/WNT7B/PIK3CB/CTNNB1/CTNNA1/CSNK1A1/PIK3R1/MYC/RXRA/SHC3
hsa04666	Fc gamma R-mediated phagocytosis	16/699	97/8521	0.005232535	0.025845553	0.017692145	PLPP3/GAB2/PRKCB/PIK3R2/PIP5K1C/AKT2/ARPC2/PRKCE/ASAP2/PIK3CB/MYO10/PIK3R1/MARCKS/ACTR3B/VAV2/PIP5K1B
hsa01522	Endocrine resistance	16/699	98/8521	0.005792637	0.027780673	0.019016799	IGF1/FOS/SHC4/IGF1R/TP53/BCL2/PRKACA/PIK3R2/AKT2/ADCY3/SRC/GNAS/ADCY5/PIK3CB/PIK3R1/SHC3
hsa04014	Ras signaling pathway	31/699	236/8521	0.005794742	0.027780673	0.019016799	EFNA3/EPHA2/ABL2/RASSF5/FGFR2/PLCE1/GAB2/IGF1/PTPN11/GRIN2B/CALM1/SHC4/GNB5/IGF1R/PRKCB/RALBP1/PRKACA/PIK3R2/AKT2/RALGAPA2/TIAM1/PIK3CB/RHOA/NFKB1/PDGFC/FGFR3/EFNA5/PIK3R1/RAPGEF5/NTRK2/SHC3
hsa04922	Glucagon signaling pathway	17/699	107/8521	0.006000656	0.028350927	0.019407157	PFKP/SIK2/ITPR2/CALM1/PKM/PRKACA/AKT2/CREB1/GNAS/PLCB4/ITPR1/CAMK2D/PPARGC1A/CAMK2A/CREB5/GCK/GNAQ
hsa04144	Endocytosis	32/699	250/8521	0.007489957	0.034881802	0.023877759	PRKCZ/LDLRAP1/FGFR2/ARAP1/VPS37B/NEDD4/SNX1/IGF1R/ARRB2/SMAD2/NEDD4L/EPS15L1/PIP5K1C/CXCR4/KIF5C/ARPC2/AGAP1/ASAP2/SRC/PARD6B/IQSEC1/RBSN/RHOA/FGFR3/ARAP3/IGF2R/ACTR3B/WIPF3/PSD3/MVB12B/SH3GL2/PIP5K1B
hsa05224	Breast cancer	21/699	147/8521	0.008489729	0.038981011	0.026683805	WNT4/TCF7L2/IGF1/LRP6/WNT5B/FOS/SHC4/IGF1R/BRCA1/AXIN2/TP53/PIK3R2/AKT2/WNT7B/PIK3CB/CTNNB1/CSNK1A1/PIK3R1/CDK6/MYC/SHC3
hsa04012	ErbB signaling pathway	14/699	85/8521	0.008808862	0.039530057	0.027059645	ABL2/NRG3/SHC4/PRKCB/PIK3R2/AKT2/SRC/PIK3CB/CAMK2D/NRG2/CAMK2A/PIK3R1/MYC/SHC3
hsa04964	Proximal tubule bicarbonate reclamation	6/699	23/8521	0.008964684	0.039530057	0.027059645	ATP1B1/GLUD1/SLC25A10/ATP1A3/GLS/SLC4A4
hsa04960	Aldosterone-regulated sodium reabsorption	8/699	37/8521	0.00897308	0.039530057	0.027059645	ATP1B1/IGF1/PRKCB/NEDD4L/PIK3R2/ATP1A3/PIK3CB/PIK3R1
hsa05205	Proteoglycans in cancer	27/699	205/8521	0.009301187	0.039964094	0.027356758	WNT4/PLCE1/IGF1/PTPN11/WNT5B/ITPR2/IGF1R/PRKCB/TP53/SMAD2/PRKACA/PIK3R2/AKT2/SRC/TIAM1/WNT7B/PIK3CB/CTNNB1/ITPR1/RHOA/ANK2/CAMK2D/CAMK2A/PIK3R1/MYC/VAV2/PTCH1
hsa04371	Apelin signaling pathway	20/699	139/8521	0.009316783	0.039964094	0.027356758	MEF2D/NOS1/ITPR2/CALM1/GNB5/SMAD2/PRKACA/AKT2/SLC8A2/HDAC4/ADCY3/PRKCE/PLCB4/ADCY5/MYLK/ITPR1/PPARGC1A/CAMK4/MEF2C/GNAQ
hsa05210	Colorectal cancer	14/699	86/8521	0.009754136	0.041296732	0.028268993	TCF7L2/FOS/AXIN2/TP53/SMAD2/BCL2/PIK3R2/AKT2/BBC3/PIK3CB/CTNNB1/RHOA/PIK3R1/MYC
hsa04213	Longevity regulating pathway - multiple species	11/699	61/8521	0.009901026	0.041381213	0.028326823	EIF4EBP2/IGF1/IGF1R/RPTOR/PRKACA/PIK3R2/AKT2/ADCY3/ADCY5/PIK3CB/PIK3R1
hsa04917	Prolactin signaling pathway	12/699	70/8521	0.010809348	0.044605665	0.030534068	FOS/SHC4/TNFRSF11A/PIK3R2/AKT2/LHCGR/SRC/PIK3CB/NFKB1/PIK3R1/GCK/SHC3
hsa04530	Tight junction	23/699	170/8521	0.011521147	0.046948676	0.032137938	PRKCZ/JAM3/DLG2/TUBA1C/NEDD4/RAB8B/NEDD4L/PRKACA/ARPC2/PRKCE/SRC/PARD6B/TIAM1/RHOA/MAGI1/RAPGEF2/PPP2R2C/RAPGEF6/PPP2R2B/MICALL2/ACTR3B/CLDN23/MPDZ
hsa04540	Gap junction	14/699	88/8521	0.011882534	0.047823532	0.032736806	ITPR2/TUBA1C/HTR2A/PRKCB/PRKACA/ADCY3/SRC/GNAS/PLCB4/ADCY5/ITPR1/GUCY1B1/PDGFC/GNAQ
hsa04070	Phosphatidylinositol signaling system	15/699	97/8521	0.012130632	0.048226658	0.033012759	PLCE1/ITPR2/CALM1/PRKCB/PIK3R2/PIP5K1C/DGKD/INPP4A/PLCB4/MTMR3/PIK3CB/ITPR1/PIK3R1/DGKB/PIP5K1B

## Sheet: kegg.list_of_genes_in_cluster_2
ID	Description	GeneRatio	BgRatio	pvalue	p.adjust	qvalue	geneID
hsa04360	Axon guidance	47/673	182/8521	1.20E-13	3.87E-11	2.89E-11	EFNA3/SRGAP2/PLXNA2/PRKCZ/EPHB2/ABLIM1/NRP1/SLIT1/SSH1/WNT5B/KRAS/SRGAP1/PLXNC1/EFNB2/NCK2/EPHA4/NGEF/SEMA4C/BMP7/LIMK2/BOC/EPHB3/SEMA3F/GNAI2/WNT5A/ROBO2/PPP3CA/BMPR1B/EFNA5/SEMA6A/CAMK2A/SLIT3/UNC5A/PIK3R1/SEMA5A/FYN/EPHA7/LIMK1/SEMA3C/SEMA3A/SEMA3D/PTK2/RGS3/ABL1/SEMA4D/PTCH1/L1CAM
hsa04390	Hippo signaling pathway	37/673	157/8521	8.87E-10	1.44E-07	1.07E-07	WNT2B/PRKCZ/BTRC/TCF7L2/CTNNA3/BMPR1A/YAP1/PPP2R1B/TEAD1/DLG2/WNT5B/CCND2/WNT1/LATS2/FRMD6/PALS1/SMAD3/LLGL1/AXIN2/SMAD2/SMAD7/GLI2/FZD7/FZD5/YWHAB/BMP7/NF2/WNT7A/CTNNB1/WNT5A/BMPR1B/CTNNA1/PPP2R2B/WWC1/FZD9/CRB2/TGFBR1
hsa04310	Wnt signaling pathway	35/673	171/8521	1.19E-07	1.28E-05	9.57E-06	WNT2B/RSPO1/BTRC/TCF7L2/LGR4/WNT5B/PRICKLE1/CCND2/WNT1/DAAM1/SMAD3/TLE3/AXIN2/PRKCG/FZD7/FZD5/PLCB4/ZNRF3/RBX1/RUVBL1/WNT7A/CTNNB1/WNT5A/PRICKLE2/PPP3CA/MAPK10/CTNND2/CAMK2A/MAP3K7/FZD9/SFRP1/TLE4/TLE1/GPC4/TBL1X
hsa04015	Rap1 signaling pathway	39/673	210/8521	3.39E-07	2.74E-05	2.05E-05	EFNA3/PRKCZ/SIPA1L2/FGFR2/FGF19/KRAS/AKT1/PRKD1/SIPA1L1/PGF/TLN2/IGF1R/ADCY7/GNAO1/BCAR1/ITGB3/SIPA1L3/PRKCG/CALM2/PLCB4/TIAM1/ADORA2A/PDGFB/ADCY5/CTNNB1/GNAI2/RAPGEF2/FGFR3/EFNA5/FGF18/PIK3R1/RAPGEF5/PDGFA/EGFR/ANGPT1/ANGPT2/RAPGEF1/VAV2/GNAQ
hsa04934	Cushing syndrome	31/673	155/8521	1.07E-06	6.91E-05	5.17E-05	WNT2B/PBX1/KCNK2/TCF7L2/SCARB1/WNT5B/WNT1/CACNA1H/ADCY7/CACNA1G/AXIN2/FZD7/FZD5/POMC/PLCB4/CACNA1I/ADCY5/WNT7A/CTNNB1/GNAI2/CACNA1D/WNT5A/CAMK2A/CREB3L2/CREB5/EGFR/FZD9/CDK6/ASH2L/NR5A1/GNAQ
hsa05165	Human papillomavirus infection	51/673	331/8521	2.29E-06	0.000120833	9.03E-05	WNT2B/ITGA10/LAMC1/PRKCZ/COL9A2/JAK1/HES4/TCF7L2/PPP2R1B/DLG2/MAML2/WNT5B/KRAS/CCND2/COL2A1/WNT1/COL4A2/AKT1/PALS1/PSMC1/ITGA11/TSC2/LLGL1/ITGB3/AXIN2/SLC9A3R1/NOTCH3/ITGA6/ITGAV/FZD7/FZD5/ATP6V1B1/JAG1/MFNG/WNT7A/CTNNB1/WNT5A/RBPJ/PPP2R2B/PIK3R1/TBPL1/LAMB1/CREB3L2/RHEB/LFNG/CREB5/EGFR/FZD9/CDK6/COL1A2/PTK2
hsa04916	Melanogenesis	23/673	101/8521	2.66E-06	0.000120833	9.03E-05	WNT2B/TCF7L2/WNT5B/KRAS/WNT1/DCT/ADCY7/GNAO1/PRKCG/FZD7/FZD5/POMC/CALM2/PLCB4/ADCY5/WNT7A/CTNNB1/GNAI2/WNT5A/CAMK2A/CREB3L2/FZD9/GNAQ
hsa04510	Focal adhesion	36/673	203/8521	2.98E-06	0.000120833	9.03E-05	ITGA10/LAMC1/CAPN2/COL9A2/PARVA/EMP1/CCND2/COL2A1/COL4A2/AKT1/ARHGAP5/PGF/TLN2/ITGA11/IGF1R/MYLK3/BCAR1/ITGB3/ACTN4/ARHGAP35/PRKCG/ITGA6/ITGAV/PDGFB/MYLK/CTNNB1/MAPK10/PIK3R1/FYN/LAMB1/PDGFA/EGFR/COL1A2/PTK2/RAPGEF1/VAV2
hsa04713	Circadian entrainment	22/673	97/8521	4.70E-06	0.00016926	0.000126477	PRKG1/MTNR1B/GNG2/RPS6KA5/RYR3/CACNA1H/ADCY7/GNAO1/CACNA1G/PRKCG/PER2/CALM2/PLCB4/CACNA1I/ADCY5/GNB4/GNAI2/CACNA1D/GUCY1A1/CAMK2A/GRIA1/GNAQ
hsa04151	PI3K-Akt signaling pathway	52/673	354/8521	7.60E-06	0.000246133	0.00018392	ITGA10/EFNA3/NTRK1/LAMC1/COL9A2/JAK1/PKN2/FGFR2/PPP2R1B/FGF19/HSP90B1/KRAS/CCND2/COL2A1/COL4A2/AKT1/GNG2/PGF/ITGA11/IGF1R/TSC2/ITGB3/RPTOR/ITGA6/ITGAV/ERBB4/IRS1/TGFA/YWHAB/IL2RB/PDGFB/GNB4/FGFR3/EFNA5/PPP2R2B/FGF18/PRLR/PIK3R1/SGK1/LAMB1/CREB3L2/RHEB/CREB5/PDGFA/EGFR/CDK6/COL1A2/ANGPT1/PTK2/ANGPT2/RXRA/NTRK2
hsa05226	Gastric cancer	28/673	149/8521	1.23E-05	0.000363075	0.000271304	WNT2B/RXRG/GADD45A/TCF7L2/FGFR2/CTNNA3/FGF19/WNT5B/KRAS/WNT1/AKT1/SMAD3/AXIN2/SMAD2/GADD45B/FZD7/FZD5/WNT7A/RARB/CTNNB1/WNT5A/CTNNA1/FGF18/PIK3R1/EGFR/FZD9/RXRA/TGFBR1
hsa05225	Hepatocellular carcinoma	30/673	168/8521	1.73E-05	0.000467315	0.000349195	WNT2B/GADD45A/TCF7L2/WNT5B/MGST1/KRAS/WNT1/AKT1/SMAD3/IGF1R/SMARCE1/AXIN2/SMAD2/GADD45B/PRKCG/FZD7/FZD5/TGFA/TXNRD2/WNT7A/CTNNB1/SMARCC1/WNT5A/PIK3R1/ARID1B/EGFR/FZD9/CDK6/SMARCA2/TGFBR1
hsa05217	Basal cell carcinoma	16/673	63/8521	2.08E-05	0.000519552	0.000388229	WNT2B/GADD45A/TCF7L2/WNT5B/WNT1/AXIN2/GADD45B/GLI2/FZD7/FZD5/WNT7A/CTNNB1/WNT5A/GLI3/FZD9/PTCH1
hsa04550	Signaling pathways regulating pluripotency of stem cells	26/673	143/8521	4.54E-05	0.001050572	0.000785027	WNT2B/JAK1/FGFR2/BMPR1A/PAX6/WNT5B/KRAS/WNT1/AKT1/SMAD3/IGF1R/ZFHX3/AXIN2/SMAD2/FZD7/FZD5/MEIS1/WNT7A/CTNNB1/WNT5A/FGFR3/BMPR1B/PIK3R1/FZD9/POU5F1B/KAT6A
hsa04340	Hedgehog signaling pathway	14/673	56/8521	8.20E-05	0.001772173	0.001324236	HHAT/BTRC/CDON/ARRB1/SCUBE2/CCND2/CSNK1G1/SMURF2/GLI2/LRP2/BOC/GLI3/GAS1/PTCH1
hsa04010	MAPK signaling pathway	43/673	301/8521	9.15E-05	0.001853192	0.001384777	EFNA3/NTRK1/HSPA6/CACNA1E/GADD45A/FGFR2/FGF19/ARRB1/KRAS/AKT1/PGF/RPS6KA5/MAP2K5/IGF1R/CACNA1H/NF1/CACNA1G/GADD45B/PRKCG/MAP4K4/ERBB4/TGFA/PDGFB/CACNA1I/MECOM/CACNA2D2/CACNA1D/PPP3CA/RAPGEF2/FGFR3/MAPK10/EFNA5/FGF18/MAP3K4/MAP3K7/PDGFA/EGFR/HSPB1/CACNA2D1/ANGPT1/ANGPT2/NTRK2/TGFBR1
hsa04927	Cortisol synthesis and secretion	15/673	65/8521	0.000123621	0.002356069	0.001760546	PBX1/KCNK2/SCARB1/CACNA1H/ADCY7/CACNA1G/POMC/PLCB4/CACNA1I/ADCY5/CACNA1D/CREB3L2/CREB5/NR5A1/GNAQ
hsa04020	Calcium signaling pathway	37/673	253/8521	0.000173742	0.003127358	0.002336882	CASQ2/NTRK1/CACNA1E/ATP2B4/ITPKB/CHRM3/ADRB1/FGFR2/STIM1/FGF19/RYR3/CACNA1H/MYLK3/ADCY7/CACNA1G/PRKCG/ERBB4/CALM2/TGFA/NTSR1/PLCB4/ADORA2A/PDGFB/CACNA1I/MYLK/MST1R/CACNA1D/PPP3CA/FGFR3/STIM2/CAMK2A/FGF18/PDE1C/PDGFA/EGFR/GNAQ/NTRK2
hsa04810	Regulation of actin cytoskeleton	34/673	229/8521	0.000236245	0.004028591	0.003010318	ITGA10/CHRM3/SLC9A1/C8B/FGFR2/PIP4K2A/FGF19/SSH1/KRAS/SPATA13/DIAPH3/AKT1/ITGA11/MYLK3/BCAR1/ITGB3/ACTN4/ARHGAP35/ARHGEF4/ITGA6/ITGAV/TIAM1/LIMK2/PDGFB/MYLK/FGFR3/CYFIP2/FGF18/PIK3R1/PDGFA/EGFR/LIMK1/PTK2/VAV2
hsa05412	Arrhythmogenic right ventricular cardiomyopathy	16/673	77/8521	0.000274086	0.004440186	0.003317878	ITGA10/LMNA/TCF7L2/CTNNA3/ITGA11/ITGB3/CDH2/ITGA6/ITGAV/CTNNB1/CACNA2D2/CACNA1D/CTNNA1/SGCD/CACNA2D1/DMD
hsa04520	Adherens junction	18/673	93/8521	0.000296861	0.004580145	0.003422461	PTPRF/TCF7L2/CTNNA3/PTPRJ/WASF3/SMAD3/IGF1R/SMURF2/PTPRM/ACTN4/HEG1/CTNNB1/CTNNA1/FYN/MAP3K7/RADIL/EGFR/TGFBR1
hsa05224	Breast cancer	24/673	147/8521	0.00047971	0.006806065	0.005085754	WNT2B/GADD45A/TCF7L2/FGF19/WNT5B/KRAS/WNT1/AKT1/ESR2/IGF1R/AXIN2/NOTCH3/GADD45B/FZD7/FZD5/JAG1/WNT7A/CTNNB1/WNT5A/FGF18/PIK3R1/EGFR/FZD9/CDK6
hsa04725	Cholinergic synapse	20/673	113/8521	0.000483147	0.006806065	0.005085754	CHRM3/KRAS/AKT1/GNG2/ADCY7/GNAO1/KCNJ12/KCNJ14/PRKCG/PLCB4/ADCY5/GNB4/GNAI2/CACNA1D/CAMK2A/PIK3R1/FYN/CREB3L2/CREB5/GNAQ
hsa04928	Parathyroid hormone synthesis, secretion and action	19/673	106/8521	0.000563676	0.00760963	0.005686208	RXRG/GATA3/ARRB1/MMP17/KL/AKAP13/ADCY7/SLC9A3R1/PRKCG/PLCB4/ADCY5/GNAI2/SLC34A2/PDE4D/CREB3L2/CREB5/EGFR/RXRA/GNAQ
hsa05205	Proteoglycans in cancer	30/673	205/8521	0.000691532	0.008962257	0.006696943	WNT2B/SLC9A1/WNT5B/KRAS/WNT1/FRS2/AKT1/IGF1R/ITGB3/SMAD2/PRKCG/ITGAV/FZD7/FZD5/ERBB4/GPC1/TIAM1/WNT7A/CTNNB1/WNT5A/CAMK2A/PIK3R1/EGFR/FZD9/COL1A2/PTK2/SDC2/VAV2/PTCH1/GPC3
hsa04924	Renin secretion	14/673	69/8521	0.000836948	0.010325997	0.007715982	EDN2/ADRB1/PDE3A/ACE/CALM2/EDN3/PLCB4/ADCY5/GNAI2/CACNA1D/PPP3CA/GUCY1A1/PDE1C/GNAQ
hsa00514	Other types of O-glycan biosynthesis	11/673	47/8521	0.0008605	0.010325997	0.007715982	COLGALT2/GALNT2/GALNT6/B3GLCT/POMT2/ST6GAL2/MFNG/XXYLT1/GXYLT2/GALNT10/LFNG
hsa04921	Oxytocin signaling pathway	24/673	154/8521	0.000951454	0.011009683	0.008226859	KRAS/RYR3/MAP2K5/MYLK3/ADCY7/GNAO1/KCNJ12/KCNJ14/PRKCG/CALM2/PLCB4/RCAN1/ADCY5/MYLK/GNAI2/CACNA2D2/CACNA1D/PPP3CA/GUCY1A1/CAMK2A/PRKAG2/EGFR/CACNA2D1/GNAQ
hsa04926	Relaxin signaling pathway	21/673	129/8521	0.00110136	0.012304851	0.009194658	PRKCZ/ARRB1/KRAS/COL4A2/AKT1/GNG2/ADCY7/GNAO1/SMAD2/COL3A1/PLCB4/ADCY5/GNB4/GNAI2/MAPK10/PIK3R1/CREB3L2/CREB5/EGFR/COL1A2/TGFBR1
hsa04919	Thyroid hormone signaling pathway	20/673	121/8521	0.0011822	0.012363685	0.009238621	RXRG/SLC9A1/MED13L/KRAS/AKT1/MYH7/DIO2/TSC2/ITGB3/NOTCH3/PRKCG/ITGAV/PLCB4/RCAN1/PFKL/KAT2B/CTNNB1/PIK3R1/RHEB/RXRA
hsa04144	Endocytosis	34/673	250/8521	0.001188623	0.012363685	0.009238621	HSPA6/CAPZB/PRKCZ/LDLRAP1/PSD/FGFR2/EHD1/ARAP1/ARRB1/VPS37B/SMAD3/IGF1R/RAB11FIP4/SMURF2/SMAD2/NEDD4L/AGAP1/RAB11FIP5/ASAP2/CHMP4B/IL2RB/ARFGAP3/IQSEC1/GRK7/FGFR3/PSD2/RUFY1/IGF2R/AMPH/EGFR/ASAP1/WWP1/MVB12B/TGFBR1
hsa04371	Apelin signaling pathway	22/673	139/8521	0.001241729	0.012363685	0.009238621	SLC9A1/MAP1LC3B2/KRAS/AKT1/GNG2/RYR3/SMAD3/MYLK3/ADCY7/SMAD2/NOTCH3/CALM2/JAG1/PLCB4/ADCY5/MYLK/GNB4/GNAI2/PPARGC1A/PRKAG2/GNAQ/TGFBR1
hsa04540	Gap junction	16/673	88/8521	0.001283772	0.012363685	0.009238621	ADRB1/PRKG1/KRAS/TUBA1C/MAP2K5/ADCY7/TUBB3/PRKCG/PLCB4/PDGFB/ADCY5/GNAI2/GUCY1A1/PDGFA/EGFR/GNAQ
hsa05223	Non-small cell lung cancer	14/673	72/8521	0.001297424	0.012363685	0.009238621	RXRG/GADD45A/KRAS/AKT1/GADD45B/PRKCG/ALK/EML4/TGFA/RARB/PIK3R1/EGFR/CDK6/RXRA
hsa04211	Longevity regulating pathway	16/673	89/8521	0.001453533	0.013374925	0.009994259	ATG13/KRAS/KL/AKT1/IGF1R/TSC2/ADCY7/RPTOR/IRS1/ADCY5/PPARGC1A/PIK3R1/CREB3L2/RHEB/PRKAG2/CREB5
hsa04728	Dopaminergic synapse	21/673	132/8521	0.001486103	0.013374925	0.009994259	PPP2R1B/BMAL1/ARRB1/AKT1/GNG2/GNAO1/PRKCG/CALM2/PLCB4/ADCY5/GNB4/GNAI2/CACNA1D/PPP3CA/MAPK10/PPP2R2B/CAMK2A/GRIA1/CREB3L2/CREB5/GNAQ
hsa04925	Aldosterone synthesis and secretion	17/673	98/8521	0.001574054	0.013420883	0.0100286	ATP2B4/SCARB1/PRKD1/CACNA1H/ADCY7/CACNA1G/PRKCG/POMC/CALM2/PLCB4/CACNA1I/ADCY5/CACNA1D/CAMK2A/CREB3L2/CREB5/GNAQ
hsa05231	Choline metabolism in cancer	17/673	98/8521	0.001574054	0.013420883	0.0100286	PLPP3/SLC44A3/CHPT1/KRAS/WASF3/AKT1/TSC2/PRKCG/PDGFB/MAPK10/PIK3R1/DGKI/RHEB/PDGFA/EGFR/SLC44A1/PCYT1B
hsa04014	Ras signaling pathway	32/673	236/8521	0.001722137	0.014306982	0.010690728	EFNA3/NTRK1/PLA2G2D/FGFR2/FGF19/KSR2/KRAS/RASA3/AKT1/GNG2/PGF/IGF1R/NF1/RALBP1/PRKCG/CALM2/TGFA/TIAM1/PDGFB/GNB4/FGFR3/MAPK10/EFNA5/FGF18/PIK3R1/RAPGEF5/PDGFA/EGFR/ANGPT1/ANGPT2/ABL1/NTRK2
hsa04350	TGF-beta signaling pathway	18/673	108/8521	0.001856727	0.015039487	0.011238083	FMOD/SKI/BMPR1A/PPP2R1B/SMAD6/SMAD3/THSD4/NOG/SMURF2/TGIF1/SMAD2/SMAD7/LTBP1/BMP7/RBX1/CHRD/BMPR1B/TGFBR1
hsa05214	Glioma	14/673	75/8521	0.001952984	0.015433335	0.011532382	GADD45A/KRAS/AKT1/IGF1R/GADD45B/PRKCG/CALM2/TGFA/PDGFB/CAMK2A/PIK3R1/PDGFA/EGFR/CDK6
hsa04261	Adrenergic signaling in cardiomyocytes	23/673	154/8521	0.002144972	0.016546927	0.0123645	ATP2B4/KCNK2/SLC9A1/ADRB1/PPP2R1B/AKT1/MYH7/RPS6KA5/TPM1/ADCY7/CALM2/PLCB4/ADCY5/SCN5A/GNAI2/CACNA2D2/CACNA1D/PPP2R2B/CAMK2A/CREB3L2/CREB5/CACNA2D1/GNAQ
hsa05212	Pancreatic cancer	14/673	76/8521	0.002224671	0.016762641	0.01252569	JAK1/GADD45A/KRAS/AKT1/SMAD3/SMAD2/RALBP1/GADD45B/TGFA/MAPK10/PIK3R1/EGFR/CDK6/TGFBR1
hsa04150	mTOR signaling pathway	23/673	156/8521	0.002542943	0.01872531	0.013992272	WNT2B/PRR5L/WNT5B/KRAS/WNT1/AKT1/IGF1R/TSC2/SLC7A5/RPTOR/RNF152/PRKCG/FZD7/FZD5/IRS1/ATP6V1B1/WNT7A/WNT5A/PIK3R1/SGK1/RHEB/FZD9/MAPKAP1
hsa04930	Type II diabetes mellitus	10/673	46/8521	0.002649274	0.019074776	0.014253406	CACNA1E/PRKCZ/HK1/ABCC8/CACNA1G/IRS1/CACNA1D/MAPK10/HK3/PIK3R1
hsa05210	Colorectal cancer	15/673	86/8521	0.002751087	0.019377219	0.014479404	GADD45A/TCF7L2/KRAS/AKT1/SMAD3/AXIN2/SMAD2/GADD45B/TGFA/CTNNB1/MAPK10/PIK3R1/MSH3/EGFR/TGFBR1
hsa04330	Notch signaling pathway	12/673	62/8521	0.002934171	0.020227052	0.015114431	MAML2/TLE3/NOTCH3/JAG1/MFNG/KAT2B/RBPJ/ATXN1/LFNG/NRARP/TLE4/TLE1
hsa01521	EGFR tyrosine kinase inhibitor resistance	14/673	79/8521	0.003232849	0.021504353	0.01606888	JAK1/FGFR2/KRAS/AKT1/IGF1R/NF1/PRKCG/TGFA/PDGFB/FGFR3/NRG2/PIK3R1/PDGFA/EGFR
hsa05414	Dilated cardiomyopathy	16/673	96/8521	0.003252202	0.021504353	0.01606888	ITGA10/LMNA/ADRB1/MYH7/TPM1/ITGA11/ADCY7/ITGB3/ITGA6/ITGAV/ADCY5/CACNA2D2/CACNA1D/SGCD/CACNA2D1/DMD
hsa04611	Platelet activation	19/673	124/8521	0.003774977	0.024461848	0.018278834	PRKCZ/PRKG1/STIM1/AKT1/TLN2/MYLK3/ADCY7/ITGB3/ARHGAP35/COL3A1/PLCB4/ADCY5/MYLK/GNAI2/GUCY1A1/PIK3R1/FYN/COL1A2/GNAQ
hsa04929	GnRH secretion	12/673	64/8521	0.003858893	0.024515322	0.018318792	ARRB1/KRAS/AKT1/ESR2/CACNA1H/CACNA1G/PRKCG/PLCB4/CACNA1I/CACNA1D/PIK3R1/GNAQ
hsa05410	Hypertrophic cardiomyopathy	15/673	90/8521	0.004310904	0.026860251	0.020071013	ITGA10/LMNA/MYH7/TPM1/ITGA11/ITGB3/ACE/ITGA6/ITGAV/CACNA2D2/CACNA1D/SGCD/PRKAG2/CACNA2D1/DMD
hsa05213	Endometrial cancer	11/673	58/8521	0.005083645	0.031077374	0.023222209	GADD45A/TCF7L2/CTNNA3/KRAS/AKT1/AXIN2/GADD45B/CTNNB1/CTNNA1/PIK3R1/EGFR
hsa04024	cAMP signaling pathway	29/673	225/8521	0.005792714	0.034623277	0.025871844	ATP2B4/KCNK2/SLC9A1/EDN2/ADRB1/PDE3A/ABCC4/AKT1/ADCY7/FXYD1/POMC/CALM2/EDN3/TIAM1/ADORA2A/ADCY5/GNAI2/CACNA1D/MAPK10/CAMK2A/GRIA1/PDE4D/PIK3R1/PDE10A/CREB3L2/CREB5/GLI3/VAV2/PTCH1
hsa05146	Amoebiasis	16/673	102/8521	0.005988224	0.034623277	0.025871844	LAMC1/RAB7B/PRDX1/C8B/COL4A2/ACTN4/PRKCG/COL3A1/PLCB4/PIK3R1/SERPINB9/LAMB1/HSPB1/COL1A2/PTK2/GNAQ
hsa04022	cGMP-PKG signaling pathway	23/673	167/8521	0.006020756	0.034623277	0.025871844	ATP2B4/ADRB1/PRKG1/IRAG1/PDE3A/KCNJ8/AKT1/MYH7/MYLK3/ADCY7/IRS1/CALM2/PLCB4/ADCY5/MYLK/GNAI2/CACNA1D/PPP3CA/PDE5A/GUCY1A1/CREB3L2/CREB5/GNAQ
hsa04971	Gastric acid secretion	13/673	76/8521	0.006091132	0.034623277	0.025871844	KCNK2/CHRM3/SLC9A1/MYLK3/ADCY7/PRKCG/CALM2/PLCB4/ADCY5/MYLK/GNAI2/CAMK2A/GNAQ
hsa05418	Fluid shear stress and atherosclerosis	20/673	139/8521	0.006209324	0.034686571	0.02591914	PRKCZ/BMPR1A/HSP90B1/MGST1/AKT1/MAP2K5/ITGB3/ITGAV/GPC1/CALM2/PDGFB/CTNNB1/MAPK10/BMPR1B/PIK3R1/MAP3K7/PDGFA/PTK2/SDC2/ASS1
hsa04012	ErbB signaling pathway	14/673	85/8521	0.00636783	0.034969098	0.026130255	KRAS/AKT1/PRKCG/NCK2/ERBB4/TGFA/BTC/MAPK10/NRG2/CAMK2A/PIK3R1/EGFR/PTK2/ABL1
hsa04730	Long-term depression	11/673	60/8521	0.006627448	0.035788221	0.026742335	PRKG1/PPP2R1B/KRAS/IGF1R/GNAO1/PRKCG/PLCB4/GNAI2/GUCY1A1/GRIA1/GNAQ
hsa05216	Thyroid cancer	8/673	37/8521	0.007180756	0.03814041	0.028499981	NTRK1/RXRG/GADD45A/TCF7L2/KRAS/GADD45B/CTNNB1/RXRA
hsa04724	Glutamatergic synapse	17/673	115/8521	0.008552251	0.044692407	0.033395886	SLC1A7/SHANK2/GNG2/HOMER2/ADCY7/GNAO1/DLGAP1/PRKCG/PLCB4/ADCY5/GNB4/GNAI2/CACNA1D/PPP3CA/GRIA1/GRIK2/GNAQ
hsa00534	Glycosaminoglycan biosynthesis - heparan sulfate / heparin	6/673	24/8521	0.009314212	0.047901664	0.035793966	EXTL1/XYLT1/HS3ST3A1/HS6ST1/EXT1/EXTL3

## Sheet: kegg.list_of_genes_in_cluster_3
ID	Description	GeneRatio	BgRatio	pvalue	p.adjust	qvalue	geneID
hsa04360	Axon guidance	41/800	182/8521	7.35E-08	2.40E-05	2.15E-05	NTNG1/PLXNA2/PARD3/CXCL12/UNC5B/LRRC4C/KRAS/PLXNC1/EFNB2/TRPC4/NFATC4/ROCK1/PARD6G/CXCR4/BOC/ROBO2/ROBO1/EPHA3/SRGAP3/EPHA6/PPP3CA/CAMK2D/SLIT2/BMPR1B/UNC5C/EFNA5/SEMA6A/SLIT3/PIK3R1/RASA1/FYN/EPHA7/LRRC4/PLXNA4/CAMK2B/SEMA3E/SEMA3A/SEMA3D/UNC5D/PAK3/EFNB1
hsa03083	Polycomb repressive complex	22/800	84/8521	6.24E-06	0.001019661	0.000912492	RNF2/MTF2/COMMD3-BMI1/BMI1/LCOR/EED/HCFC2/FBRSL1/AEBP2/YAF2/MBD6/MAX/ASXL3/MBD5/PHC3/RYBP/L3MBTL3/EZH2/AUTS2/BCORL1/RBBP7/BCOR
hsa04911	Insulin secretion	21/800	86/8521	3.21E-05	0.003500083	0.003132217	ATP1A1/ATP1B1/CHRM3/PRKACB/KCNMA1/FXYD2/PLCB2/GNAS/PLCB1/PLCB4/ATP1B3/KCNMB2/CAMK2D/CCKAR/CREB3L2/GCK/CAMK2B/ADCY1/RIMS2/GNAQ/ATP1B4
hsa04720	Long-term potentiation	17/800	67/8521	0.000107415	0.008781212	0.007858288	RAP1A/PRKACB/KRAS/PPP1R1A/RAP1B/PLCB2/PLCB1/PLCB4/PPP3CA/CAMK2D/GRIA2/CAMK4/BRAF/CAMK2B/ADCY1/GNAQ/RPS6KA6
hsa04961	Endocrine and other factor-regulated calcium reabsorption	14/800	53/8521	0.000273047	0.016806382	0.015039994	ATP1A1/ATP1B1/DNM3/ATP2B4/PRKACB/FXYD2/PLCB2/SLC8A1/GNAS/PLCB1/PLCB4/ATP1B3/GNAQ/ATP1B4
hsa04919	Thyroid hormone signaling pathway	24/800	121/8521	0.000308374	0.016806382	0.015039994	ATP1A1/RXRG/ATP1B1/PRKACB/PLCE1/FXYD2/KRAS/MED4/PLCB2/STAT1/PLCB1/PLCB4/RCAN1/ATP1B3/MED12L/KAT2B/THRB/CTNNB1/PIK3R1/RCAN2/RHEB/NCOA2/ATP1B4/SLC16A2
hsa04918	Thyroid hormone synthesis	17/800	75/8521	0.00046179	0.021572198	0.019304912	ATP1A1/ATP1B1/PRKACB/FXYD2/PLCB2/PAX8/GNAS/PLCB1/PLCB4/ATP1B3/IYD/CGA/CREB3L2/ADCY1/GSR/GNAQ/ATP1B4
hsa04925	Aldosterone synthesis and secretion	20/800	98/8521	0.000652939	0.026688893	0.023883832	ATP1A1/ATP1B1/ATP2B4/PRKACB/PDE2A/PRKD1/PLCB2/NR4A2/PRKCE/GNAS/PLCB1/PLCB4/ATP1B3/CAMK2D/CAMK4/CREB3L2/CAMK2B/ADCY1/GNAQ/ATP1B4
hsa04261	Adrenergic signaling in cardiomyocytes	27/800	154/8521	0.001029215	0.037394818	0.03346454	ATP1A1/ATP1B1/ATP2B4/PRKACB/CACNB2/PPP2R1B/FXYD2/KCNQ1/PPP1R1A/PLCB2/CACNG1/BCL2/CACNB4/SLC8A1/GNAS/PLCB1/PLCB4/POPDC2/ATP1B3/CAMK2D/PPP2R2B/CREB3L2/CAMK2B/ADCY1/CACNA2D1/GNAQ/ATP1B4

## Sheet: kegg.list_of_genes_in_cluster_4
ID	Description	GeneRatio	BgRatio	pvalue	p.adjust	qvalue	geneID
hsa04360	Axon guidance	48/699	182/8521	1.15E-13	3.76E-11	2.57E-11	EFNA3/EPHA2/PRKCZ/PLXNA2/WNT4/ABLIM1/NRP1/CXCL12/ROBO3/PTPN11/WNT5B/SRGAP1/SEMA6D/SEMA4B/RGMA/PIK3R2/CXCR4/EPHA4/DPYSL5/SRC/PARD6B/BMP7/BOC/SEMA5B/PLXNA1/EPHB1/PIK3CB/EPHB3/RHOA/ROBO2/ROBO1/CAMK2D/ABLIM2/BMPR1B/UNC5C/EFNA5/CAMK2A/SLIT3/PIK3R1/FYN/PLXNA4/DPYSL2/RGS3/NTNG2/SEMA4D/PTCH1/PLXNA3/EFNB1
hsa04015	Rap1 signaling pathway	48/699	210/8521	3.26E-11	5.31E-09	3.64E-09	EFNA3/EPHA2/RASSF5/PRKCZ/SIPA1L2/LPAR3/FGFR2/PLCE1/IGF1/GRIN2B/RAPGEF3/EVL/PRKD1/SIPA1L1/CALM1/TLN2/IGF1R/PRKCB/GNAO1/BCAR1/MAP2K6/PIK3R2/AKT2/RAPGEF4/ADCY3/SRC/PARD6B/GNAS/PLCB4/TIAM1/ADCY5/PIK3CB/CTNNB1/RHOA/MAGI1/PDGFC/RAPGEF2/FGFR3/EFNA5/RAPGEF6/ARAP3/FYB1/PIK3R1/RAPGEF5/MAGI2/RAPGEF1/VAV2/GNAQ
hsa04925	Aldosterone synthesis and secretion	27/699	98/8521	1.09E-08	1.18E-06	8.08E-07	ATP1B1/ATP2B4/CAMK1G/SCARB1/CACNA1C/ITPR2/NR4A1/PRKD1/CALM1/CACNA1H/PRKCB/CACNA1G/PRKACA/ATP1A3/CREB1/ADCY3/PRKCE/GNAS/PLCB4/CACNA1I/ADCY5/ITPR1/CAMK2D/CAMK4/CAMK2A/CREB5/GNAQ
hsa04024	cAMP signaling pathway	44/699	225/8521	3.68E-08	3.00E-06	2.06E-06	ATP1B1/ATP2B4/EDN2/PDE4B/PLCE1/CHRM1/ATP2A2/GRIN2B/CACNA1C/RAPGEF3/ABCC4/NFKBIA/FOS/CALM1/SOX9/GRIN2C/NFATC1/PDE4A/PRKACA/PIK3R2/AKT2/ATP1A3/RAPGEF4/CREB1/ADCY3/LHCGR/CNGA3/GNAS/TIAM1/ADCY5/PIK3CB/RHOA/NFKB1/CAMK2D/CAMK4/ARAP3/CAMK2A/PDE4D/PIK3R1/CREB5/GLI3/VAV2/PTCH1/GABBR2
hsa04713	Circadian entrainment	25/699	97/8521	1.60E-07	1.04E-05	7.13E-06	KCNJ9/NOS1AP/NOS1/GRIN2B/CACNA1C/FOS/CALM1/GNB5/CACNA1H/PRKCB/GNAO1/CACNA1G/GRIN2C/PRKACA/CREB1/ADCY3/GNAS/PLCB4/CACNA1I/ADCY5/ITPR1/CAMK2D/GUCY1B1/CAMK2A/GNAQ
hsa04310	Wnt signaling pathway	35/699	171/8521	2.99E-07	1.62E-05	1.11E-05	WNT4/TCF7L2/LRP6/WNT5B/PRICKLE1/DAAM1/CCDC88C/TLE3/PRKCB/SIAH1/NKD1/AXIN2/TP53/NFATC1/PRKACA/PLCB4/ZNRF3/WNT7B/SENP2/CTNNB1/RHOA/PRICKLE2/DKK2/CAMK2D/CTBP1/CTNND2/CSNK1A1/CAMK2A/DAAM2/MYC/INVS/TLE4/TLE1/ROR2/GPC4
hsa04725	Cholinergic synapse	26/699	113/8521	9.99E-07	4.65E-05	3.19E-05	KCNQ1/CHRM1/CACNA1C/ITPR2/FOS/GNB5/PRKCB/GNAO1/BCL2/PRKACA/PIK3R2/AKT2/CREB1/ADCY3/PLCB4/ADCY5/PIK3CB/ITPR1/CAMK2D/CAMK4/CAMK2A/PIK3R1/FYN/CREB5/KCNQ3/GNAQ
hsa04919	Thyroid hormone signaling pathway	27/699	121/8521	1.18E-06	4.81E-05	3.29E-05	RXRG/ATP1B1/WNT4/PFKP/PLCE1/ATP2A2/MED13L/TBC1D4/MYH7/PRKCB/THRA/TP53/PRKACA/PIK3R2/AKT2/ATP1A3/SRC/PLCB4/RCAN1/PIK3CB/THRB/CTNNB1/PIK3R1/RHEB/MYC/NCOA2/RXRA
hsa04971	Gastric acid secretion	20/699	76/8521	1.95E-06	7.05E-05	4.83E-05	ATP1B1/KCNQ1/ITPR2/KCNK10/CALM1/PRKCB/GAST/PRKACA/ATP1A3/SLC9A4/ADCY3/GNAS/PLCB4/ADCY5/MYLK/ITPR1/CAMK2D/CAMK2A/SLC26A7/GNAQ
hsa04750	Inflammatory mediator regulation of TRP channels	23/699	98/8521	2.92E-06	8.68E-05	5.94E-05	IGF1/ITPR2/ASIC1/HTR2A/PRKCH/CALM1/PRKCB/MAP2K6/PRKACA/PIK3R2/ADCY3/PRKCE/SRC/GNAS/PLCB4/ADCY5/PIK3CB/ITPR1/CAMK2D/CAMK2A/PIK3R1/F2RL1/GNAQ
hsa04020	Calcium signaling pathway	43/699	253/8521	2.93E-06	8.68E-05	5.94E-05	CACNA1E/ATP2B4/CAMK1G/FGFR2/PLCE1/STIM1/CHRM1/ATP2A2/NOS1/GRIN2B/CACNA1C/ITPR2/HTR2A/CALM1/NTRK3/CACNA1H/PRKCB/CACNA1G/GRIN2C/NFATC1/PRKACA/SLC8A2/CXCR4/PDE1A/ADCY3/LHCGR/GNAS/NTSR1/PLCB4/CACNA1I/MYLK/ITPR1/CAMK2D/PDGFC/FGFR3/CCKAR/CAMK4/CAMK2A/TFEB/PDE1C/PTK2B/GNAQ/NTRK2
hsa04928	Parathyroid hormone synthesis, secretion and action	24/699	106/8521	3.52E-06	9.56E-05	6.54E-05	MEF2D/RXRG/PDE4B/LRP6/ITPR2/FOS/AKAP13/PRKCB/ARRB2/BCL2/PDE4A/PRKACA/CREB1/ADCY3/GNAS/PLCB4/ADCY5/ITPR1/RHOA/PDE4D/MEF2C/CREB5/RXRA/GNAQ
hsa04261	Adrenergic signaling in cardiomyocytes	30/699	154/8521	6.08E-06	0.000141529	9.69E-05	ATP1B1/ATP2B4/CACNB2/KCNQ1/ATP2A2/CACNA1C/RAPGEF3/MYH7/CALM1/CACNG5/BCL2/PRKACA/AKT2/ATP1A3/SLC8A2/CACNB4/RAPGEF4/CREB1/ADCY3/GNAS/PLCB4/CACNG2/ADCY5/CAMK2D/PPP2R2C/PPP2R2B/CAMK2A/CREB5/CACNA2D1/GNAQ
hsa04921	Oxytocin signaling pathway	30/699	154/8521	6.08E-06	0.000141529	9.69E-05	KCNJ9/CAMK1G/CACNB2/CACNA1C/ITPR2/FOS/CALM1/PRKCB/GNAO1/CACNG5/NFATC1/PRKACA/CACNB4/ADCY3/SRC/GNAS/PLCB4/RCAN1/CACNG2/ADCY5/MYLK/ITPR1/RHOA/CAMK2D/GUCY1B1/CAMK4/CAMK2A/MEF2C/CACNA2D1/GNAQ
hsa04929	GnRH secretion	17/699	64/8521	9.96E-06	0.000216511	0.000148209	KCNN3/KCNJ9/CACNA1C/ITPR2/CACNA1H/PRKCB/ARRB2/CACNA1G/PIK3R2/AKT2/PLCB4/CACNA1I/PIK3CB/ITPR1/PIK3R1/GNAQ/GABBR2
hsa04927	Cortisol synthesis and secretion	17/699	65/8521	1.25E-05	0.000254244	0.000174039	PBX1/SCARB1/CACNA1C/ITPR2/NR4A1/CACNA1H/CACNA1G/PRKACA/CREB1/ADCY3/GNAS/PLCB4/CACNA1I/ADCY5/ITPR1/CREB5/GNAQ
hsa04911	Insulin secretion	20/699	86/8521	1.49E-05	0.000285717	0.000195583	KCNN3/ATP1B1/KCNMA1/CACNA1C/PRKCB/PRKACA/ATP1A3/RAPGEF4/CREB1/ADCY3/GNAS/PLCB4/ADCY5/KCNMB2/CAMK2D/CCKAR/CAMK2A/CREB5/GCK/GNAQ
hsa04915	Estrogen signaling pathway	26/699	137/8521	4.03E-05	0.00073013	0.000499798	KCNJ9/ITPR2/FOS/CALM1/SHC4/GNAO1/RARA/BCL2/PRKACA/PIK3R2/AKT2/CREB1/ADCY3/SRC/GNAS/PLCB4/ADCY5/PIK3CB/ITPR1/PIK3R1/FKBP5/CREB5/NCOA2/GNAQ/SHC3/GABBR2
hsa04022	cGMP-PKG signaling pathway	29/699	167/8521	8.12E-05	0.001392608	0.000953287	MEF2D/ATP1B1/ATP2B4/OPRD1/KCNMA1/ATP2A2/CACNA1C/ITPR2/MYH7/CALM1/NFATC1/AKT2/ATP1A3/SLC8A2/CREB1/ADCY3/PRKCE/PLCB4/ADCY5/MYLK/KCNMB2/ITPR1/RHOA/GUCY1B1/MEF2C/CREB5/GTF2IRD1/GTF2I/GNAQ
hsa04550	Signaling pathways regulating pluripotency of stem cells	26/699	143/8521	8.58E-05	0.001397959	0.00095695	WNT4/FGFR2/NODAL/PCGF5/IGF1/WNT5B/ACVR1B/ESRRB/IGF1R/ZFHX3/AXIN2/SMAD2/PIK3R2/AKT2/ACVR1/MEIS1/WNT7B/PIK3CB/CTNNB1/FGFR3/BMPR1B/LIFR/PIK3R1/JARID2/MYC/KAT6A
hsa04924	Renin secretion	16/699	69/8521	0.000109248	0.001557171	0.001065935	REN/EDN2/KCNMA1/CACNA1C/ITPR2/CALM1/PRKACA/PDE1A/CREB1/GNAS/PLCB4/ADCY5/ITPR1/GUCY1B1/PDE1C/GNAQ
hsa04926	Relaxin signaling pathway	24/699	129/8521	0.00010965	0.001557171	0.001065935	PRKCZ/NOS1/NFKBIA/FOS/SHC4/GNB5/GNAO1/ARRB2/SMAD2/PRKACA/PIK3R2/AKT2/CREB1/COL4A4/ADCY3/SRC/GNAS/PLCB4/ADCY5/PIK3CB/NFKB1/PIK3R1/CREB5/SHC3
hsa05135	Yersinia infection	25/699	137/8521	0.000109862	0.001557171	0.001065935	NFKBIA/FOS/BCAR1/MAP2K6/BAIAP2/NFATC1/PIK3R2/PIP5K1C/AKT2/ARPC2/SRC/TAB1/PIK3CB/RHOA/NFKB1/FYB1/PIK3R1/TAB2/ACTR3B/WIPF3/ELMO1/PTK2B/VAV2/PIP5K1B/GNAQ
hsa04340	Hedgehog signaling pathway	14/699	56/8521	0.000123451	0.001676882	0.001147882	HHAT/CDON/SCUBE2/ARRB2/BCL2/PRKACA/MEGF8/CUL3/BOC/CSNK1G3/CSNK1A1/GLI3/GAS1/PTCH1
hsa04724	Glutamatergic synapse	22/699	115/8521	0.000137578	0.001794011	0.00122806	SLC1A7/GRIK4/SHANK2/SLC17A8/GRIN2B/CACNA1C/ITPR2/SLC38A1/GNB5/PRKCB/GNAO1/GRIN2C/DLGAP1/PRKACA/GLS/ADCY3/GNAS/PLCB4/ADCY5/ITPR1/SLC1A3/GNAQ
hsa04072	Phospholipase D signaling pathway	26/699	148/8521	0.000154213	0.001919153	0.001313724	PLPP3/LPAR3/GAB2/PTPN11/RAPGEF3/SHC4/PIK3R2/PIP5K1C/AKT2/RAPGEF4/DGKD/ADCY3/GNAS/PLCB4/ADCY5/PIK3CB/RHOA/PDGFC/PIK3R1/FYN/AGPAT4/DGKB/RHEB/PTK2B/PIP5K1B/SHC3
hsa04728	Dopaminergic synapse	24/699	132/8521	0.000158948	0.001919153	0.001313724	KCNJ9/GRIN2B/CACNA1C/ITPR2/FOS/CALM1/GNB5/PRKCB/GNAO1/ARRB2/PRKACA/AKT2/KIF5C/CREB1/GNAS/PLCB4/ADCY5/ITPR1/CAMK2D/PPP2R2C/PPP2R2B/CAMK2A/CREB5/GNAQ
hsa04935	Growth hormone synthesis, secretion and action	22/699	120/8521	0.000260914	0.003037779	0.002079461	IGF1/CACNA1C/ITPR2/FOS/SHC4/PRKCB/BCAR1/MAP2K6/PRKACA/PIK3R2/AKT2/CREB1/ADCY3/GNAS/PLCB4/ADCY5/PIK3CB/ITPR1/PIK3R1/CREB5/GNAQ/SHC3
hsa05214	Glioma	16/699	75/8521	0.000306794	0.003448792	0.002360813	CAMK1G/IGF1/CALM1/SHC4/IGF1R/PRKCB/TP53/PIK3R2/AKT2/PIK3CB/CAMK2D/CAMK4/CAMK2A/PIK3R1/CDK6/SHC3
hsa04934	Cushing syndrome	26/699	155/8521	0.000330552	0.003591993	0.002458839	PBX1/WNT4/TCF7L2/SCARB1/WNT5B/CACNA1C/ITPR2/NR4A1/CACNA1H/CACNA1G/AXIN2/PRKACA/CREB1/ADCY3/GNAS/PLCB4/CACNA1I/WNT7B/ADCY5/CTNNB1/ITPR1/CAMK2D/CAMK2A/CREB5/CDK6/GNAQ
hsa05163	Human cytomegalovirus infection	34/699	225/8521	0.00034206	0.00359715	0.00246237	CXCL12/ITPR2/NFKBIA/CALM1/GNB5/AKAP13/PRKCB/GNAO1/BCAR1/MAP2K6/TP53/NFATC1/PRKACA/PIK3R2/AKT2/CXCR4/CREB1/ADCY3/SRC/GNAS/PLCB4/ADCY5/PIK3CB/CTNNB1/ITPR1/RHOA/NFKB1/PIK3R1/RHEB/CREB5/CDK6/MYC/PTK2B/GNAQ
hsa05031	Amphetamine addiction	15/699	69/8521	0.000378726	0.00381343	0.00261042	GRIN2B/CACNA1C/FOS/CALM1/PRKCB/GRIN2C/PRKACA/CREB1/GNAS/ADCY5/CAMK2D/CAMK4/CAMK2A/CREB5/ARC
hsa04390	Hippo signaling pathway	26/699	157/8521	0.000406185	0.00381343	0.00261042	CRB1/PRKCZ/WNT4/TCF7L2/TEAD1/DLG2/WNT5B/FRMD6/NKD1/AXIN2/SMAD2/SMAD7/BBC3/PARD6B/BMP7/WNT7B/WWTR1/CTNNB1/LIMD1/PPP2R2C/BMPR1B/CTNNA1/PPP2R2B/YWHAZ/MYC/STK3
hsa05100	Bacterial invasion of epithelial cells	16/699	77/8521	0.00042026	0.00381343	0.00261042	MAD2L2/VCL/SHC4/BCAR1/PIK3R2/ARPC2/SRC/PIK3CB/CTNNB1/RHOA/SEPTIN11/CTNNA1/PIK3R1/ACTR3B/ELMO1/SHC3
hsa04010	MAPK signaling pathway	42/699	301/8521	0.00042099	0.00381343	0.00261042	EFNA3/EPHA2/CACNA1E/DUSP10/FGFR2/CACNB2/IGF1/CACNA1C/NR4A1/FOS/IGF1R/CACNA1H/PRKCB/ARRB2/CACNA1G/CACNG5/MAP2K6/TP53/NFATC1/PRKACA/AKT2/MAP4K4/CACNB4/MAP3K20/MAP4K3/CACNG2/TAB1/CACNA1I/MAP3K13/NFKB1/PDGFC/RAPGEF2/FGFR3/EFNA5/MEF2C/TAB2/MAP3K4/HSPB1/CACNA2D1/MYC/STK3/NTRK2
hsa04611	Platelet activation	22/699	124/8521	0.000421115	0.00381343	0.00261042	PRKCZ/STIM1/ITPR2/TLN2/PRKACA/PIK3R2/AKT2/ADCY3/SRC/GNAS/PLCB4/ADCY5/MYLK/PIK3CB/GP5/ITPR1/RHOA/GUCY1B1/PIK3R1/FYN/TBXAS1/GNAQ
hsa04514	Cell adhesion molecules	26/699	158/8521	0.000449421	0.003959761	0.002710589	NFASC/CNTN2/SDC3/PTPRF/NCAM1/CADM1/JAM3/CD6/NRXN2/NRXN3/CD276/CDH2/PTPRM/LRRC4B/PTPRS/ICOS/CDH4/IGSF11/NLGN1/VCAN/CNTNAP2/ITGB8/CLDN23/NTNG2/PTPRD/CD40LG
hsa04916	Melanogenesis	19/699	101/8521	0.00048152	0.004130935	0.002827763	WNT4/TCF7L2/WNT5B/DCT/CALM1/PRKCB/GNAO1/PRKACA/CREB1/ADCY3/GNAS/PLCB4/WNT7B/ADCY5/CTNNB1/MITF/CAMK2D/CAMK2A/GNAQ
hsa04962	Vasopressin-regulated water reabsorption	11/699	44/8521	0.000650307	0.005435896	0.003721052	DYNC1H1/STX4/PRKACA/DYNC1I2/CREB1/ADCY3/DCTN1/GNAS/DCTN4/CREB5/DYNC1I1
hsa04071	Sphingolipid signaling pathway	21/699	121/8521	0.000762907	0.006217694	0.004256219	S1PR1/PRKCZ/OPRD1/GAB2/PRKCB/TP53/BCL2/PIK3R2/CERS1/AKT2/PRKCE/PLCB4/PIK3CB/RHOA/NFKB1/PPP2R2C/PPP2R2B/PIK3R1/FYN/NSMAF/GNAQ
hsa04211	Longevity regulating pathway	17/699	89/8521	0.000784633	0.006238788	0.004270659	IGF1/IGF1R/TP53/RPTOR/PRKACA/PIK3R2/AKT2/CREB1/ADCY3/ADCY5/PIK3CB/NFKB1/PPARGC1A/CAMK4/PIK3R1/RHEB/CREB5
hsa04720	Long-term potentiation	14/699	67/8521	0.000894223	0.006940871	0.004751258	GRIN2B/CACNA1C/ITPR2/RAPGEF3/CALM1/PRKCB/GRIN2C/PRKACA/PLCB4/ITPR1/CAMK2D/CAMK4/CAMK2A/GNAQ
hsa04918	Thyroid hormone synthesis	15/699	75/8521	0.000959929	0.0072776	0.00498176	ATP1B1/ITPR2/PRKCB/PRKACA/ATP1A3/CREB1/ADCY3/GNAS/PLCB4/ADCY5/ITPR1/IYD/CREB5/TG/GNAQ
hsa04670	Leukocyte transendothelial migration	20/699	115/8521	0.000983062	0.007283596	0.004985865	RASSF5/CXCL12/VCL/THY1/JAM3/PTPN11/RAPGEF3/PRKCB/BCAR1/PIK3R2/CXCR4/RAPGEF4/PIK3CB/CTNNB1/RHOA/CTNNA1/PIK3R1/PTK2B/CLDN23/VAV2
hsa05032	Morphine addiction	17/699	91/8521	0.001019118	0.007382945	0.005053873	KCNJ9/PDE4B/GABRA5/GABRG3/GNB5/PRKCB/GNAO1/ARRB2/PDE4A/PRKACA/PDE1A/ADCY3/GNAS/ADCY5/PDE4D/PDE1C/GABBR2
hsa05017	Spinocerebellar ataxia	23/699	143/8521	0.001293678	0.009091222	0.006223245	DAB1/ATP2A2/GRIN2B/ITPR2/TBPL2/PRKCB/GRIN2C/PIK3R2/AKT2/CIC/PSMD14/PUM2/PLCB4/PIK3CB/ITPR1/RBPJ/PIK3R1/ATXN1/PSMB1/PSMC2/SEM1/PSMB7/GNAQ
hsa04912	GnRH signaling pathway	17/699	93/8521	0.001310698	0.009091222	0.006223245	CACNA1C/ITPR2/CALM1/PRKCB/MAP2K6/PRKACA/ADCY3/SRC/GNAS/PLCB4/ADCY5/ITPR1/CAMK2D/CAMK2A/MAP3K4/PTK2B/GNAQ
hsa04972	Pancreatic secretion	18/699	102/8521	0.001457202	0.009896828	0.00677471	ATP1B1/ATP2B4/KCNMA1/KCNQ1/ATP2A2/ITPR2/PRKCB/RAB27B/ATP1A3/ADCY3/GNAS/PLCB4/ADCY5/ITPR1/RHOA/CCKAR/SLC4A4/GNAQ
hsa01521	EGFR tyrosine kinase inhibitor resistance	15/699	79/8521	0.001669743	0.011108904	0.007604416	FGFR2/IGF1/SHC4/IGF1R/PRKCB/BCL2/PIK3R2/AKT2/SRC/PIK3CB/PDGFC/FGFR3/NRG2/PIK3R1/SHC3
hsa04062	Chemokine signaling pathway	28/699	192/8521	0.001922194	0.012532703	0.008579054	PRKCZ/CXCL12/NFKBIA/SHC4/GNB5/PRKCB/BCAR1/CCR7/ARRB2/PRKACA/PIK3R2/AKT2/CXCR4/ADCY3/SRC/PREX1/PLCB4/TIAM1/ADCY5/PIK3CB/RHOA/NFKB1/PIK3R1/ELMO1/PTK2B/VAV2/GNAQ/SHC3
hsa05215	Prostate cancer	17/699	97/8521	0.002108743	0.013479415	0.00922711	TCF7L2/FGFR2/IGF1/NFKBIA/IGF1R/TP53/BCL2/PIK3R2/AKT2/CREB1/PIK3CB/ETV5/CTNNB1/NFKB1/PDGFC/PIK3R1/CREB5
hsa04727	GABAergic synapse	16/699	89/8521	0.002151523	0.013488397	0.009233258	SLC6A12/CACNA1C/SLC38A1/GABRA5/GABRG3/GNB5/PRKCB/GNAO1/GABARAPL2/PRKACA/GLS/ADCY3/SRC/SLC6A1/ADCY5/GABBR2
hsa04510	Focal adhesion	29/699	203/8521	0.002212124	0.013606649	0.009314206	CAPN2/VCL/IGF1/SHC4/TLN2/IGF1R/PRKCB/BCAR1/LAMA3/BCL2/LAMA1/PIK3R2/PIP5K1C/AKT2/COL4A4/SRC/COL6A1/MYLK/PIK3CB/CTNNB1/RHOA/PDGFC/PIK3R1/FYN/ITGB8/RAPGEF1/VAV2/PIP5K1B/SHC3
hsa05225	Hepatocellular carcinoma	25/699	168/8521	0.002488093	0.015020712	0.010282179	WNT4/ARID1A/GSTO2/TCF7L2/LRP6/WNT5B/SHC4/IGF1R/PRKCB/AXIN2/TP53/SMAD2/PIK3R2/DPF1/AKT2/WNT7B/PIK3CB/CTNNB1/CSNK1A1/PIK3R1/ARID1B/CDK6/MYC/SMARCA2/SHC3
hsa04270	Vascular smooth muscle contraction	21/699	134/8521	0.002854512	0.016919469	0.011581942	EDN2/KCNMA1/CACNA1C/ITPR2/PRKCH/CALM1/PRKCB/PRKACA/RAMP1/ADCY3/PRKCE/GNAS/PLCB4/ADCY5/MYLK/KCNMB2/ITPR1/RHOA/GUCY1B1/CALD1/GNAQ
hsa04730	Long-term depression	12/699	60/8521	0.003016152	0.017456622	0.011949641	IGF1/NOS1/ITPR2/IGF1R/PRKCB/GNAO1/GNAS/PLCB4/ITPR1/GUCY1B1/GRID2/GNAQ
hsa05222	Small cell lung cancer	16/699	92/8521	0.003052231	0.017456622	0.011949641	RXRG/NFKBIA/TP53/LAMA3/BCL2/LAMA1/PIK3R2/AKT2/COL4A4/PIK3CB/NFKB1/PIK3R1/CDK6/MYC/TRAF1/RXRA
hsa05220	Chronic myeloid leukemia	14/699	76/8521	0.003157442	0.017747004	0.012148418	GAB2/PTPN11/NFKBIA/SHC4/TP53/PIK3R2/AKT2/PIK3CB/NFKB1/CTBP1/PIK3R1/CDK6/MYC/SHC3
hsa04970	Salivary secretion	16/699	93/8521	0.003414109	0.018864396	0.01291331	ATP1B1/ATP2B4/KCNMA1/NOS1/ITPR2/CALM1/PRKCB/PRKACA/ATP1A3/ADCY3/GNAS/PLCB4/ADCY5/ITPR1/GUCY1B1/GNAQ
hsa04930	Type II diabetes mellitus	10/699	46/8521	0.003494122	0.018870375	0.012917402	CACNA1E/PRKCZ/CACNA1C/PKM/CACNA1G/PIK3R2/PRKCE/PIK3CB/PIK3R1/GCK
hsa05412	Arrhythmogenic right ventricular cardiomyopathy	14/699	77/8521	0.003576029	0.018870375	0.012917402	TCF7L2/CACNB2/ATP2A2/CACNA1C/CACNG5/CDH2/LAMA1/SLC8A2/CACNB4/CACNG2/CTNNB1/CTNNA1/ITGB8/CACNA2D1
hsa04722	Neurotrophin signaling pathway	19/699	119/8521	0.003588844	0.018870375	0.012917402	PTPN11/NFKBIA/CALM1/SHC4/NTRK3/TP53/BCL2/PIK3R2/AKT2/PIK3CB/RHOA/NFKB1/CAMK2D/CAMK4/CAMK2A/PIK3R1/RAPGEF1/NTRK2/SHC3
hsa05230	Central carbon metabolism in cancer	13/699	70/8521	0.004065593	0.021037833	0.0144011	FGFR2/PFKP/PKM/NTRK3/TP53/PIK3R2/AKT2/GLS/PIK3CB/FGFR3/PIK3R1/GCK/MYC
hsa05414	Dilated cardiomyopathy	16/699	96/8521	0.004717271	0.024028597	0.016448377	CACNB2/IGF1/ATP2A2/CACNA1C/MYH7/CACNG5/LAMA1/PRKACA/SLC8A2/CACNB4/ADCY3/GNAS/CACNG2/ADCY5/ITGB8/CACNA2D1
hsa05226	Gastric cancer	22/699	149/8521	0.004835194	0.02425036	0.016600182	RXRG/WNT4/TCF7L2/FGFR2/LRP6/WNT5B/SHC4/AXIN2/TP53/SMAD2/BCL2/PIK3R2/AKT2/WNT7B/PIK3CB/CTNNB1/CTNNA1/CSNK1A1/PIK3R1/MYC/RXRA/SHC3
hsa04666	Fc gamma R-mediated phagocytosis	16/699	97/8521	0.005232535	0.025845553	0.017692145	PLPP3/GAB2/PRKCB/PIK3R2/PIP5K1C/AKT2/ARPC2/PRKCE/ASAP2/PIK3CB/MYO10/PIK3R1/MARCKS/ACTR3B/VAV2/PIP5K1B
hsa01522	Endocrine resistance	16/699	98/8521	0.005792637	0.027780673	0.019016799	IGF1/FOS/SHC4/IGF1R/TP53/BCL2/PRKACA/PIK3R2/AKT2/ADCY3/SRC/GNAS/ADCY5/PIK3CB/PIK3R1/SHC3
hsa04014	Ras signaling pathway	31/699	236/8521	0.005794742	0.027780673	0.019016799	EFNA3/EPHA2/ABL2/RASSF5/FGFR2/PLCE1/GAB2/IGF1/PTPN11/GRIN2B/CALM1/SHC4/GNB5/IGF1R/PRKCB/RALBP1/PRKACA/PIK3R2/AKT2/RALGAPA2/TIAM1/PIK3CB/RHOA/NFKB1/PDGFC/FGFR3/EFNA5/PIK3R1/RAPGEF5/NTRK2/SHC3
hsa04922	Glucagon signaling pathway	17/699	107/8521	0.006000656	0.028350927	0.019407157	PFKP/SIK2/ITPR2/CALM1/PKM/PRKACA/AKT2/CREB1/GNAS/PLCB4/ITPR1/CAMK2D/PPARGC1A/CAMK2A/CREB5/GCK/GNAQ
hsa04144	Endocytosis	32/699	250/8521	0.007489957	0.034881802	0.023877759	PRKCZ/LDLRAP1/FGFR2/ARAP1/VPS37B/NEDD4/SNX1/IGF1R/ARRB2/SMAD2/NEDD4L/EPS15L1/PIP5K1C/CXCR4/KIF5C/ARPC2/AGAP1/ASAP2/SRC/PARD6B/IQSEC1/RBSN/RHOA/FGFR3/ARAP3/IGF2R/ACTR3B/WIPF3/PSD3/MVB12B/SH3GL2/PIP5K1B
hsa05224	Breast cancer	21/699	147/8521	0.008489729	0.038981011	0.026683805	WNT4/TCF7L2/IGF1/LRP6/WNT5B/FOS/SHC4/IGF1R/BRCA1/AXIN2/TP53/PIK3R2/AKT2/WNT7B/PIK3CB/CTNNB1/CSNK1A1/PIK3R1/CDK6/MYC/SHC3
hsa04012	ErbB signaling pathway	14/699	85/8521	0.008808862	0.039530057	0.027059645	ABL2/NRG3/SHC4/PRKCB/PIK3R2/AKT2/SRC/PIK3CB/CAMK2D/NRG2/CAMK2A/PIK3R1/MYC/SHC3
hsa04964	Proximal tubule bicarbonate reclamation	6/699	23/8521	0.008964684	0.039530057	0.027059645	ATP1B1/GLUD1/SLC25A10/ATP1A3/GLS/SLC4A4
hsa04960	Aldosterone-regulated sodium reabsorption	8/699	37/8521	0.00897308	0.039530057	0.027059645	ATP1B1/IGF1/PRKCB/NEDD4L/PIK3R2/ATP1A3/PIK3CB/PIK3R1
hsa05205	Proteoglycans in cancer	27/699	205/8521	0.009301187	0.039964094	0.027356758	WNT4/PLCE1/IGF1/PTPN11/WNT5B/ITPR2/IGF1R/PRKCB/TP53/SMAD2/PRKACA/PIK3R2/AKT2/SRC/TIAM1/WNT7B/PIK3CB/CTNNB1/ITPR1/RHOA/ANK2/CAMK2D/CAMK2A/PIK3R1/MYC/VAV2/PTCH1
hsa04371	Apelin signaling pathway	20/699	139/8521	0.009316783	0.039964094	0.027356758	MEF2D/NOS1/ITPR2/CALM1/GNB5/SMAD2/PRKACA/AKT2/SLC8A2/HDAC4/ADCY3/PRKCE/PLCB4/ADCY5/MYLK/ITPR1/PPARGC1A/CAMK4/MEF2C/GNAQ
hsa05210	Colorectal cancer	14/699	86/8521	0.009754136	0.041296732	0.028268993	TCF7L2/FOS/AXIN2/TP53/SMAD2/BCL2/PIK3R2/AKT2/BBC3/PIK3CB/CTNNB1/RHOA/PIK3R1/MYC
hsa04213	Longevity regulating pathway - multiple species	11/699	61/8521	0.009901026	0.041381213	0.028326823	EIF4EBP2/IGF1/IGF1R/RPTOR/PRKACA/PIK3R2/AKT2/ADCY3/ADCY5/PIK3CB/PIK3R1
hsa04917	Prolactin signaling pathway	12/699	70/8521	0.010809348	0.044605665	0.030534068	FOS/SHC4/TNFRSF11A/PIK3R2/AKT2/LHCGR/SRC/PIK3CB/NFKB1/PIK3R1/GCK/SHC3
hsa04530	Tight junction	23/699	170/8521	0.011521147	0.046948676	0.032137938	PRKCZ/JAM3/DLG2/TUBA1C/NEDD4/RAB8B/NEDD4L/PRKACA/ARPC2/PRKCE/SRC/PARD6B/TIAM1/RHOA/MAGI1/RAPGEF2/PPP2R2C/RAPGEF6/PPP2R2B/MICALL2/ACTR3B/CLDN23/MPDZ
hsa04540	Gap junction	14/699	88/8521	0.011882534	0.047823532	0.032736806	ITPR2/TUBA1C/HTR2A/PRKCB/PRKACA/ADCY3/SRC/GNAS/PLCB4/ADCY5/ITPR1/GUCY1B1/PDGFC/GNAQ
hsa04070	Phosphatidylinositol signaling system	15/699	97/8521	0.012130632	0.048226658	0.033012759	PLCE1/ITPR2/CALM1/PRKCB/PIK3R2/PIP5K1C/DGKD/INPP4A/PLCB4/MTMR3/PIK3CB/ITPR1/PIK3R1/DGKB/PIP5K1B
