# Supplementary material for: Epigenetic insights into GABAergic development in Dravet Syndrome iPSC and therapeutic implications
Source: eLife. 2024 Aug 27;12:RP92599. doi: 10.7554/eLife.92599 (PMC11349296; doi:10.7554/eLife.92599)
Supplement: Supplementary file 3. — Source data for Figure 2 and Figure 2—figure supplements 1–2. [file elife-92599-supp3.xlsx]

## Sheet: Supplementary File 3
Cluster	Peak Names	Patient_d0	Patient_d19	Patient_d35	Patient_d65	MEM.SHIP	Annotation	Genes
cluster_1	chr1_100462207_100462935	17.6007293251956	2.50821386192243	4.18606991282374	1.74790466030482	0.870502895168043	3' UTR	CDC14A
cluster_1	chr1_100949387_100950214	17.8946044316273	5.54285799944863	5.99861647898904	7.82059913966802	0.7940135633675	Intron (ENST00000370112.8/148867, intron 8 of 11)	SLC30A7
cluster_1	chr1_101653382_101654200	13.8297372904041	2.99343019677935	1.10368197278686	0.792744697265326	0.978489363977783	Intron (ENST00000668955.1/105378872, intron 2 of 3)	LINC01709
cluster_1	chr1_1024636_1025485	17.8902901620838	7.04175913173056	4.95174796118325	13.2411273566554	0.519039141288659	Intron (ENST00000379370.7/375790, intron 2 of 35)	AGRN
cluster_1	chr1_10638926_10639685	10.9683737557223	6.81948145688441	4.25948807630382	2.61002614780362	0.72961905381399	3' UTR	CASZ1
cluster_1	chr1_107867182_107868164	23.950494116263	5.07650627599032	4.53958968290777	3.4357248851902	0.953708007584963	Intron (ENST00000370056.9/10451, intron 2 of 26)	MIR7852
cluster_1	chr1_10814943_10815962	9.72458959665891	7.35844371148894	3.53071676421461	1.16585900029315	0.575736121487295	Distal Intergenic	CASZ1
cluster_1	chr1_10835600_10836390	46.8064055609078	28.7393616308428	20.4633698211256	8.26712188053901	0.684512393448397	Distal Intergenic	CASZ1
cluster_1	chr1_108947797_108948510	8.52113328411829	2.81344882421405	1.78565111161579	4.78496981989875	0.643694050732742	Promoter (<=1kb)	CLCC1
cluster_1	chr1_109089175_109089685	9.88594990092136	3.90635496512651	2.32414765947124	3.00223082966215	0.924004903058417	Promoter (1-2kb)	TMEM167B
cluster_1	chr1_109229389_109230384	49.0654943528358	35.256052387374	25.8157627171469	5.890160549295	0.556133531072899	Promoter (<=1kb)	SARS1
cluster_1	chr1_109239132_109239827	19.9215004257313	6.58395659229633	4.22459425051942	4.23490170035748	0.976264203245989	Promoter (2-3kb)	SARS1
cluster_1	chr1_109240575_109241243	18.144450116941	2.28234830074522	1.68710385603248	6.09524856122068	0.745485278402209	Distal Intergenic	SARS1
cluster_1	chr1_109263275_109264156	26.9267946018077	10.5590918706848	15.3930885152539	10.0861179246028	0.73664085168601	Promoter (1-2kb)	CELSR2
cluster_1	chr1_10960872_10961510	15.9721213603363	9.64620177216482	5.74114513464799	4.54073099894402	0.775989015459448	Promoter (2-3kb)	C1orf127
cluster_1	chr1_109636150_109636849	8.86513111892721	7.06596322534346	2.82810611525477	3.3953926795011	0.593609645652366	Distal Intergenic	AMPD2
cluster_1	chr1_109643225_109644051	20.1201510435671	5.79571785926724	5.24658030613744	5.3106051801062	0.938023727501434	Distal Intergenic	GSTM4
cluster_1	chr1_110029494_110030003	10.8290033211772	3.87094727332154	5.51242360376481	4.23328649858637	0.778989797510984	Promoter (1-2kb)	STRIP1
cluster_1	chr1_110070346_110071010	12.1419015709384	8.82088143839914	4.62119258230742	5.29263681999339	0.682719140398624	Promoter (<=1kb)	ALX3
cluster_1	chr1_110243212_110244009	6.62975743813186	1.55030466035804	3.57494940979803	2.991838524726	0.626786190446025	3' UTR	KCNC4
cluster_1	chr1_11045264_11046018	15.2967110920708	4.0277936854601	2.54104021786319	2.22385610326245	0.985641955120655	Promoter (<=1kb)	MASP2
cluster_1	chr1_110477483_110478589	6.16080059696357	1.42803578060815	2.78741363118068	2.95369036513503	0.657815142250175	Promoter (2-3kb)	CYMP
cluster_1	chr1_11052668_11053601	16.4732409370651	1.89643315792566	1.76862239912278	1.16804830550269	0.937611774930741	Promoter (1-2kb)	SRM
cluster_1	chr1_110780534_110781320	9.45829795881092	4.51820883756771	4.19977560221713	2.49012010417999	0.846878775350213	Distal Intergenic	CD53
cluster_1	chr1_111515463_111516531	11.0800185269429	1.86399469619152	1.73870777304827	1.29968309996689	0.942495559119357	Intron (ENST00000369717.8/57413, intron 1 of 5)	TMIGD3
cluster_1	chr1_112358753_112359424	10.5128623189753	3.85106958802023	4.68092641092569	2.13993204607783	0.805633704165302	Promoter (1-2kb)	LINC02884
cluster_1	chr1_112743323_112744641	13.7562795054569	1.35906125080481	1.75973410695037	1.96830214200407	0.883110396280539	Distal Intergenic	TAFA3
cluster_1	chr1_112809211_112809785	18.8676555202168	8.44856185748329	8.17841081371419	10.5484841693103	0.776497234945557	Distal Intergenic	LINC01356
cluster_1	chr1_112817272_112818577	26.990231236955	2.10877214011313	1.05528347131173	1.00344699969464	0.943540762802936	Distal Intergenic	LINC01356
cluster_1	chr1_11286322_11287326	18.4335196994225	4.89724034118537	5.13149621488025	2.58720684616568	0.915294504314076	3' UTR	UBIAD1
cluster_1	chr1_112880802_112881381	17.6685176918879	8.89537500036469	5.31044147330121	9.35339778041744	0.74559773623304	Distal Intergenic	LINC01356
cluster_1	chr1_112905467_112906469	7.93276815130893	1.6115564395423	1.53344433059859	3.84942663068637	0.666820709219666	Distal Intergenic	SLC16A1
cluster_1	chr1_112957398_112957790	19.9732766776971	7.7109399511926	3.79465640117728	14.0015414417799	0.531513193479544	Promoter (<=1kb)	SLC16A1
cluster_1	chr1_113027123_113028281	20.9166437133175	1.26910066262831	1.4046968131289	1.16477868679757	0.916075312546798	Intron (ENST00000627431.2/100506392, intron 4 of 5)	LOC107985189
cluster_1	chr1_113041831_113043102	30.6489548638551	10.3757888306794	13.0105217956375	11.4658136252156	0.84387673721834	Intron (ENST00000627431.2/100506392, intron 5 of 5)	LRIG2-DT
cluster_1	chr1_113043258_113044206	10.3139602383878	3.59200479022339	1.46269974937833	1.76285486786144	0.923981831274835	Intron (ENST00000627431.2/100506392, intron 5 of 5)	LRIG2-DT
cluster_1	chr1_1136430_1137284	9.08573183279654	3.86770369856478	2.77545365451348	1.06306485698816	0.836817817272615	Promoter (<=1kb)	LINC01342
cluster_1	chr1_114032863_114033697	13.8822353151481	1.86866998137308	2.4245182788019	3.31275628412636	0.838031945131971	Exon (ENST00000632517.2/ENST00000632517.2, exon 1 of 1)	OLFML3
cluster_1	chr1_114037887_114038879	11.7828505183715	2.65823866853591	1.06826905658523	1.0470297534599	0.977325958064318	Distal Intergenic	OLFML3
cluster_1	chr1_114075489_114076457	11.0594891003828	2.91371852605123	1.57196733042767	1.77006086891476	0.971003960501776	Distal Intergenic	SYT6
cluster_1	chr1_114088257_114089153	11.9562128803234	2.50084275274651	1.61619184909582	0.696432398237516	0.973160829909882	Distal Intergenic	SYT6
cluster_1	chr1_11499205_11500471	13.7512122807948	6.55997300602821	3.42656652694621	2.10157321776261	0.829711514750199	Promoter (1-2kb)	NA
cluster_1	chr1_115088852_115090322	18.6479899651513	12.5453014252097	12.5019437055729	7.10204790254174	0.642037578030735	Promoter (<=1kb)	TSPAN2
cluster_1	chr1_115147732_115148624	9.16617938352891	4.55919533864984	1.92557995215165	1.44980863128904	0.806470212425017	Distal Intergenic	LINC01765
cluster_1	chr1_115771542_115772323	20.9626590914987	9.24913414107688	12.4412372462188	12.8345211676501	0.671184781197249	Promoter (2-3kb)	CASQ2
cluster_1	chr1_115838277_115839829	14.4596594864344	6.88964619486815	6.76098523376062	3.04343985188748	0.777514028044363	Promoter (<=1kb)	NHLH2
cluster_1	chr1_1164527_1165382	12.0609903661722	1.90049948687984	1.24565817170707	1.42372923586923	0.946165161372141	Promoter (1-2kb)	MIR200B
cluster_1	chr1_11648548_11649253	19.6059002573044	5.59705804423895	2.63142094098949	7.19341346420929	0.788946663868776	Promoter (1-2kb)	FBXO2
cluster_1	chr1_11650306_11650748	21.3477679888011	12.2878336146609	7.27185303050039	8.48247362777004	0.834657607214234	Promoter (<=1kb)	FBXO2
cluster_1	chr1_116627150_116627763	7.39900544484905	2.65775510740032	2.56078201947293	2.96136452131767	0.878457298295645	Intron (ENST00000369483.5/3321, intron 2 of 11)	IGSF3
cluster_1	chr1_11663897_11665147	22.5136661981884	10.1761481538326	8.44988465236676	10.342186505417	0.889003002546171	Promoter (<=1kb)	FBXO6
cluster_1	chr1_11682331_11683093	23.4152256494353	7.15723496093029	4.3608971471195	2.16784336135356	0.942422858158732	Promoter (1-2kb)	MAD2L2
cluster_1	chr1_11719168_11720131	10.0795693046715	4.82606780163819	4.00530006916415	3.55547946217059	0.969596245096148	3' UTR	AGTRAP
cluster_1	chr1_117268568_117269648	24.533978160183	2.59754596275333	2.45893922097832	1.64139293234028	0.934784180062432	Promoter (2-3kb)	LINC01525
cluster_1	chr1_11761961_11763059	10.4739190339492	5.37621605902155	2.68475837602967	2.72076616818979	0.838761818399364	Promoter (<=1kb)	C1orf167
cluster_1	chr1_11784767_11785570	25.3271495738321	13.149848843502	6.3017534612615	6.91591372506781	0.830778949564492	Promoter (<=1kb)	C1orf167
cluster_1	chr1_11882888_11883695	12.9678050016231	3.80057807130093	2.27300041441865	1.55384971528383	0.969136751461418	Distal Intergenic	NPPB
cluster_1	chr1_118984274_118984841	15.7623515212312	8.94502248419944	8.06155712562431	2.18931199824736	0.651694200440812	Intron (ENST00000207157.7/6913, intron 1 of 7)	TBX15
cluster_1	chr1_118987473_118988623	17.840536283558	7.54522090886186	5.55015549721171	6.29029403800833	0.94941537518444	Promoter (<=1kb)	TBX15
cluster_1	chr1_119327029_119328254	14.6067052154777	7.14824030597212	8.13606201896734	5.0809443103335	0.792245151856605	Promoter (<=1kb)	LINC01780
cluster_1	chr1_119340707_119341697	18.6273695017828	0.448200296961038	0.573508299057987	0.946601579027641	0.899725162841729	Intron (ENST00000457683.1/105378934, intron 2 of 3)	LINC01780
cluster_1	chr1_119611334_119612091	12.7465427772375	3.09794522929474	4.71019603174829	4.75839176849369	0.77796987924426	Distal Intergenic	LINC00622
cluster_1	chr1_11966970_11967594	15.624495811929	5.44666605421753	4.55692443793183	4.51014393092453	0.967744168394435	Promoter (2-3kb)	PLOD1
cluster_1	chr1_119674823_119675998	12.0442715410169	3.96679314517131	4.22744305547943	4.65195618792097	0.862284895976363	Intron (ENST00000641597.1/26227, intron 3 of 14)	PHGDH
cluster_1	chr1_12078737_12079919	19.1046033064918	4.93921804857569	2.71493811815617	5.07742160280261	0.884966305697111	Intron (ENST00000263932.7/943, intron 1 of 14)	TNFRSF8
cluster_1	chr1_12166719_12167645	13.289190363554	7.96258183790452	5.98123113995829	3.00324092342927	0.724278834954522	Promoter (<=1kb)	MIR7846
cluster_1	chr1_12629063_12630294	19.4872586097262	1.69751421358381	1.00486815663116	1.18809924010251	0.935463952379144	Distal Intergenic	DHRS3
cluster_1	chr1_1293573_1294367	23.8954342120472	3.13288146114829	5.47905782835844	6.37506695832014	0.803400941831404	Promoter (<=1kb)	ACAP3
cluster_1	chr1_1353487_1354419	23.7180614926596	6.17502887992964	4.6622318738145	2.88889428856666	0.971226163296855	Promoter (<=1kb)	MXRA8
cluster_1	chr1_13764505_13765412	7.83478890763717	5.31921656416224	2.80527003759398	3.65163041520142	0.720085773203043	Intron (ENST00000311066.10/7799, intron 6 of 9)	PRDM2
cluster_1	chr1_1409886_1410960	25.8851994014474	9.91454806859735	7.05686735806781	1.57050871056356	0.835255274869007	Promoter (<=1kb)	MRPL20-DT
cluster_1	chr1_1419774_1420597	14.8042073618752	5.18587564257504	1.71967952015545	2.28907656336244	0.906242943200908	Promoter (<=1kb)	ANKRD65-AS1
cluster_1	chr1_1425607_1426241	14.4349065219946	6.39842974365895	3.55583985466532	3.85169249692559	0.909159281843429	Promoter (<=1kb)	TMEM88B
cluster_1	chr1_145871786_145873130	11.4559864367602	6.43501841139441	4.0245076279271	4.4896711403352	0.860580364206465	Exon (ENST00000544626.2/148741, exon 8 of 12)	PIAS3
cluster_1	chr1_146019178_146020186	10.4145711320932	4.01215037399226	2.23585945765644	1.56823242287212	0.915187876494783	Promoter (1-2kb)	HJV
cluster_1	chr1_147567608_147568409	14.5327573480209	4.5819286593472	3.80594563468276	2.81822746848757	0.970693408322668	Intron (ENST00000683836.1/607, intron 1 of 9)	BCL9
cluster_1	chr1_147640697_147641410	11.986805603823	5.11520745459426	4.59792899903408	4.18527042058022	0.976006539348432	Intron (ENST00000609196.5/51205, intron 5 of 5)	ACP6
cluster_1	chr1_147833278_147834592	9.5703719902808	4.78419575468473	4.50969428717045	1.93116676993103	0.757473145069618	Distal Intergenic	LOC102723321
cluster_1	chr1_147837014_147837716	18.673879422011	3.10452809052316	1.20100842073226	0.969671320159028	0.982070317970323	Distal Intergenic	LOC102723321
cluster_1	chr1_148013120_148014146	9.03589561630052	3.52714688483046	1.96723031776247	1.31462740525685	0.907677371777996	Promoter (<=1kb)	LINC02804
cluster_1	chr1_148262878_148264272	39.543488745148	19.8222073425258	16.3981441242093	13.4260472569944	0.934087787533522	Exon (ENST00000363009.1/ENST00000363009.1, exon 1 of 1)	LOC101927468
cluster_1	chr1_148264712_148265291	23.733544196257	8.97606836617601	4.1528468012406	4.01654133612415	0.917224405037447	Distal Intergenic	LOC101927468
cluster_1	chr1_148303110_148304199	13.4002839202473	4.52516805480654	4.06050375744705	3.99609014509641	0.951614257168968	Intron (ENST00000648583.1/ENST00000648583.1, intron 1 of 3)	LOC105371225
cluster_1	chr1_148317319_148319033	8.31242789947556	5.3596494215514	3.44376971483502	1.62229216595421	0.678480389836025	Exon (ENST00000452108.1/ENST00000452108.1, exon 1 of 1)	MIR5087
cluster_1	chr1_148353313_148354363	12.0453006594666	5.48854827039598	2.90458743639709	3.24394661542814	0.893076305433897	Intron (ENST00000638958.1/105371225, intron 1 of 6)	RNVU1-1
cluster_1	chr1_148361294_148363052	11.3476829095262	7.62520744725737	6.38655966154031	3.23274142922798	0.651929284420534	Promoter (<=1kb)	RNVU1-1
cluster_1	chr1_148378519_148379591	8.67845182850003	2.70229831296353	0.639277324702027	0.790537803954174	0.912335888843063	Exon (ENST00000622328.1/388685, exon 2 of 4)	MIR6077
cluster_1	chr1_149845371_149845907	19.8696692071618	4.68976902250828	2.94227301592408	2.11409514211944	0.985035485257384	Promoter (2-3kb)	H2AC18
cluster_1	chr1_150259745_150260472	36.6368585580772	28.3771663673534	17.9867360846492	11.0472463369089	0.60313119667248	Promoter (1-2kb)	CA14
cluster_1	chr1_1504690_1505889	8.71793590971966	4.86103950506408	3.02281636131788	4.12372055597382	0.825015438377435	Promoter (<=1kb)	ATAD3B
cluster_1	chr1_150604418_150605587	17.2615226429539	6.20571558177577	7.08694891833902	7.65670562126884	0.825834237354196	Intron (ENST00000369016.8/2029, intron 4 of 4)	ENSA
cluster_1	chr1_150634809_150635779	17.3019613121181	9.62715484059808	5.09378252032706	3.0580002320954	0.765673547923783	Exon (ENST00000702956.1/112268239, exon 2 of 2)	LOC112268239
cluster_1	chr1_150981086_150982020	27.2585920250966	7.65019526721336	4.05801078073415	6.62590146656056	0.915184207358569	Promoter (<=1kb)	ANXA9
cluster_1	chr1_151024388_151024991	14.7644126829578	4.85439013621451	3.03144476339904	4.08039620643875	0.930666995767344	Promoter (<=1kb)	PRUNE1
cluster_1	chr1_151131048_151132312	30.7447238034378	18.341550494271	16.9790135930695	9.06618364109651	0.718867742269426	Promoter (2-3kb)	SEMA6C
cluster_1	chr1_151133061_151133709	17.9012001391857	5.82003247882602	2.17336714441994	2.41202084084306	0.930386279977067	Promoter (1-2kb)	SEMA6C
cluster_1	chr1_15128486_15129202	11.932123294585	7.05494671182294	4.02149028735822	5.76527032494161	0.781431927611844	Intron (ENST00000310916.6/200197, intron 1 of 5)	TMEM51-AS1
cluster_1	chr1_151294753_151295518	13.0120305818817	4.2437958861699	2.79837452481278	1.32816770747213	0.92793480977339	Promoter (<=1kb)	PI4KB
cluster_1	chr1_151512919_151513368	23.4812130743548	3.84534891728093	4.18824607771999	4.34757782121266	0.898732478250183	Promoter (1-2kb)	CGN
cluster_1	chr1_151593745_151594603	11.0115416043312	4.41685340451496	2.85858939361663	5.30262111663523	0.765588122199582	Distal Intergenic	SNX27
cluster_1	chr1_15186557_15187458	10.6893361493036	4.22547659877116	1.52345242373592	1.43283736254351	0.877765091139542	Intron (ENST00000428417.5/55092, intron 1 of 2)	TMEM51-AS2
cluster_1	chr1_15196838_15197558	14.0424011989902	4.98825175682195	3.23056354529795	8.19072565798735	0.635655966123246	Intron (ENST00000428417.5/55092, intron 1 of 2)	TMEM51-AS2
cluster_1	chr1_15206465_15207867	13.0252896215144	10.3915257379532	8.49146633653022	2.92449237865162	0.501749406272588	Intron (ENST00000428417.5/55092, intron 1 of 2)	FHAD1
cluster_1	chr1_153122796_153124230	17.7155348485199	2.28664531734314	1.65125369164808	4.02286044084649	0.841485307264435	Distal Intergenic	SPRR2F
cluster_1	chr1_153465617_153467055	9.53511263246044	2.15257202698548	2.88426093118687	1.64918565379913	0.878156335561548	Distal Intergenic	S100A7
cluster_1	chr1_153494804_153495504	13.301305332911	5.3648903269078	3.94288865319764	4.69486118497442	0.936644920550229	Distal Intergenic	S100A7
cluster_1	chr1_153598530_153599295	17.841230373779	3.53421919957454	1.75026336330571	2.18067252836009	0.963645617118733	Intron (ENST00000647794.1/ENST00000647794.1, intron 1 of 1)	S100A16
cluster_1	chr1_153678356_153680331	10.7797376754561	8.7317475010929	4.60364058515818	5.33517731575461	0.612830142028159	Promoter (<=1kb)	NPR1
cluster_1	chr1_153697169_153698771	13.195612841556	3.89911999967187	2.46575794477166	1.77804271541425	0.974564511459478	Distal Intergenic	MIR8083
cluster_1	chr1_15384142_15385033	24.7572217745508	10.6874287970141	9.23555367385744	1.74129529221949	0.758818614562044	Promoter (<=1kb)	FHAD1
cluster_1	chr1_15430854_15431561	11.4084734324944	5.69199197608994	3.92962784899654	3.06345778010449	0.885434757570447	Distal Intergenic	CTRC
cluster_1	chr1_154501467_154503228	10.1720064272111	2.56832877664562	2.98342583973177	1.8407461469388	0.906637503388761	Promoter (<=1kb)	TDRD10
cluster_1	chr1_154567321_154568421	29.2875818179287	17.2589901758963	12.7066851771322	6.96538221980868	0.748453330923219	Promoter (<=1kb)	LOC107985206
cluster_1	chr1_154609327_154609814	19.4226443689417	4.03649012656659	2.07792346331905	2.50715302005418	0.96541076928909	Promoter (<=1kb)	ADAR
cluster_1	chr1_154993048_154993724	8.82179133553595	3.54775454603919	3.16078827368986	3.14145879088606	0.96100129301013	Promoter (<=1kb)	LENEP
cluster_1	chr1_15508525_15509453	27.443280301343	0.907398802037445	0.437682956625994	1.50820959267495	0.905176806893207	Promoter (1-2kb)	CASP9
cluster_1	chr1_155165971_155168182	19.1660820046284	13.2667991675249	8.95973526642768	5.73475761286248	0.682810896039253	Distal Intergenic	KRTCAP2
cluster_1	chr1_155728806_155729609	7.83619117160876	4.93629699220708	4.2609857554895	1.60910072401091	0.638872775397387	Promoter (<=1kb)	DAP3
cluster_1	chr1_15584295_15585334	20.6573211999946	7.5099634367289	4.20967824604694	2.84388992295482	0.926375936364374	Promoter (<=1kb)	AGMAT
cluster_1	chr1_155984278_155984808	25.7649634694121	3.71280164290907	1.77518271601616	2.65050134856722	0.945125232668241	Exon (ENST00000462460.6/9181, exon 4 of 26)	ARHGEF2
cluster_1	chr1_156025843_156026365	13.8971851635531	11.8633278437398	5.49404655648245	2.54200305007375	0.527085549098735	Intron (ENST00000650235.1/105371729, intron 3 of 3)	SSR2
cluster_1	chr1_156060767_156061826	28.0519614082365	5.49387094612625	1.71723334511882	1.69983572046345	0.978282014832791	Promoter (<=1kb)	RAB25
cluster_1	chr1_156076778_156077200	21.136640612302	8.99412581494365	5.35367357869173	8.43484014455694	0.851553219828863	Exon (ENST00000532414.3/92312, exon 2 of 2)	MEX3A
cluster_1	chr1_156141098_156141677	17.686490504121	8.99970912103965	4.71990973844529	7.68621587645226	0.802816840869911	Distal Intergenic	LMNA
cluster_1	chr1_156149480_156150811	21.9871872563839	8.00708288206264	3.94184450832207	8.4903580319608	0.807620312366949	Promoter (<=1kb)	SEMA4A
cluster_1	chr1_156181314_156182405	26.7019782947341	12.4631867640175	8.8715817058527	3.80775301869399	0.81589886199021	Distal Intergenic	SEMA4A
cluster_1	chr1_156245463_156246247	15.238670584305	8.70755734744102	2.37547919560863	3.83926240365525	0.729887139489259	Promoter (1-2kb)	PAQR6
cluster_1	chr1_156356730_156357395	26.7754873920845	3.30803308809845	4.19830248403163	6.47482681002185	0.828892140326588	Intron (ENST00000413555.5/7203, intron 1 of 7)	CCT3
cluster_1	chr1_156368755_156369642	13.507182203919	6.03652071240163	3.9492672709856	6.21872361647062	0.819314563183783	Promoter (<=1kb)	RHBG
cluster_1	chr1_156382889_156383426	15.8939930896204	9.59283707778209	5.1345709104639	6.57465900745513	0.785933687543385	Promoter (<=1kb)	RHBG
cluster_1	chr1_156401637_156402353	14.5611942240933	3.07339842112513	1.90996446161621	1.18460840698308	0.98256976455869	Distal Intergenic	MIR9-1HG
cluster_1	chr1_156421268_156422848	22.1738581122526	7.1084340118486	5.31162515926145	3.89313364417421	0.97376572504446	Promoter (<=1kb)	MIR9-1HG
cluster_1	chr1_156445542_156446225	14.3528412968616	4.22618822644394	3.88757687995438	5.17580901598776	0.856378648476999	Exon (ENST00000663987.1/ENST00000663987.1, exon 3 of 3)	MIR9-1HG
cluster_1	chr1_156480606_156481278	14.39763441087	4.98666084142605	4.43722401977167	6.92145190122061	0.767876182781242	Promoter (<=1kb)	MEF2D
cluster_1	chr1_156503277_156503623	32.6008297295338	6.5265251441508	6.50989755538667	20.2185289181336	0.559234628274926	Promoter (2-3kb)	MEF2D
cluster_1	chr1_156583781_156584463	15.0140591516372	4.26240504303295	4.57914041546194	5.92672887925372	0.815319777724175	Promoter (<=1kb)	TTC24
cluster_1	chr1_156692539_156693596	42.1161687435055	20.475077897665	10.5416372807873	11.767510312469	0.868061089184661	Intron (ENST00000650347.1/ENST00000650347.1, intron 1 of 1)	CRABP2
cluster_1	chr1_156813477_156814595	20.445001912204	10.2604531823008	10.5613583998162	6.32559716608544	0.809166071266289	Promoter (<=1kb)	SH2D2A
cluster_1	chr1_156876076_156876753	14.9962494333232	4.24675571397507	1.198356700244	1.85223444867372	0.934482603961826	Promoter (1-2kb)	NTRK1
cluster_1	chr1_156927398_156928189	18.5792011236847	14.1764523682333	8.73616594745696	9.8090502888036	0.686848034104617	Promoter (<=1kb)	LRRC71
cluster_1	chr1_157074069_157074738	9.68641887474295	4.36214847783708	2.85101949303367	3.87780713318705	0.884851591006781	Exon (ENST00000414328.2/ENST00000414328.2, exon 1 of 1)	ETV3L
cluster_1	chr1_157155730_157156475	17.2587195969396	10.7846653684144	7.87271765186504	3.79800568453126	0.696484211799739	Distal Intergenic	LOC107985211
cluster_1	chr1_157161955_157162706	20.9647642209148	2.52691388297899	1.97972304560908	2.96590270547271	0.904808222218536	Distal Intergenic	LOC107985211
cluster_1	chr1_157163292_157164075	24.3182024284501	3.42231608808774	4.63404798035501	3.38462600472141	0.89606101036695	Distal Intergenic	LOC107985211
cluster_1	chr1_157310840_157311774	14.4959367249441	2.22172322018818	2.51958390687414	3.17633978065835	0.867648066703628	Promoter (<=1kb)	LOC101928202
cluster_1	chr1_157505442_157506067	9.35889688970859	3.52234691214348	2.80847184167916	2.84699411450061	0.974319585922785	Distal Intergenic	FCRL5
cluster_1	chr1_15791937_15792426	15.9414698502239	5.51508297434243	4.541650213287	2.94169070591416	0.94820151910952	Distal Intergenic	FBLIM1
cluster_1	chr1_157978512_157979483	9.31300212046643	3.23083920469248	1.85400431285783	2.94453957639444	0.890520633716592	Distal Intergenic	KIRREL1
cluster_1	chr1_158077322_158077926	10.217366537683	3.64526908301889	2.66832209336809	1.64848661003023	0.938622734864732	Intron (ENST00000360089.8/55243, intron 2 of 12)	KIRREL1
cluster_1	chr1_158103809_158104472	12.0927871587983	4.08220610714442	2.00620256555559	1.31061889491079	0.929034892981896	Distal Intergenic	KIRREL1
cluster_1	chr1_158117825_158118338	20.3159708197277	3.63876297523257	4.82146558446777	4.76596290851843	0.863408719625178	Distal Intergenic	SMIM42
cluster_1	chr1_158180741_158181740	16.304353240586	7.68078303295648	9.10269454602991	7.94252154485298	0.8288279327125	Promoter (<=1kb)	CD1D
cluster_1	chr1_158864440_158865090	17.7213845598282	2.11053639619066	3.10392149732292	2.38235104053605	0.887382921773254	Distal Intergenic	MNDA
cluster_1	chr1_159005626_159006887	8.92922643929769	3.22011939482116	0.738626393185958	1.35468117562772	0.875783172070447	Promoter (<=1kb)	IFI16
cluster_1	chr1_159207790_159208785	7.03505369235161	2.42232347333164	2.55857765561607	2.69369948129083	0.878249005907288	Promoter (<=1kb)	CADM3-AS1
cluster_1	chr1_159218912_159219688	10.3877727492842	1.84423391224476	3.44769000329075	2.11637443754024	0.813782686890883	Distal Intergenic	CADM3-AS1
cluster_1	chr1_159798758_159799366	13.9098970384429	3.9824061802816	7.16885437042655	4.4618616129968	0.720269014887836	Promoter (1-2kb)	FCRL6
cluster_1	chr1_159945155_159946383	37.8825150510602	29.5325115015047	29.2543409277776	14.4409279015879	0.503710792156737	Promoter (<=1kb)	IGSF9
cluster_1	chr1_160046402_160047096	11.671671829858	5.3101694950779	4.14713261798051	5.66721547620275	0.841360683250221	Intron (ENST00000639408.1/3766, intron 1 of 3)	PIGM
cluster_1	chr1_160083969_160084489	19.0225885099459	6.74113965144767	6.43784771539387	6.73617058866984	0.919065291208658	Promoter (2-3kb)	KCNJ9
cluster_1	chr1_160085642_160086068	21.0678372542816	5.93417954074214	4.91527735461098	5.48779795350632	0.936257074392106	Intron (ENST00000368088.4/3765, intron 2 of 2)	KCNJ9
cluster_1	chr1_160095755_160096260	31.0698284371142	3.76573996489956	3.17691461501344	4.64990229185365	0.899315167078391	Promoter (<=1kb)	IGSF8
cluster_1	chr1_160108970_160109774	13.6546299200441	5.86843480864551	3.77652864199692	3.88942092779056	0.944091181756848	Distal Intergenic	ATP1A2
cluster_1	chr1_160115463_160116187	15.0430495162512	6.98565050640666	4.63901011368807	7.04564225806793	0.824163926405617	Promoter (<=1kb)	ATP1A2
cluster_1	chr1_16012602_16013613	31.2146156764322	12.3665238561897	8.67223328432558	10.4894860658325	0.936876388074408	Distal Intergenic	HSPB7
cluster_1	chr1_160169014_160170244	28.9125912233313	15.4067697016231	12.2367009736842	6.69768929297831	0.796181269359049	Promoter (1-2kb)	ATP1A4
cluster_1	chr1_16026308_16027299	33.4279175606726	12.6277328485005	11.6061697655948	3.93436218293439	0.835658922884515	Promoter (<=1kb)	CLCNKA
cluster_1	chr1_160416197_160416807	10.71787838829	3.91018424153314	5.03815105035987	3.31070259435562	0.826422560056844	Promoter (2-3kb)	VANGL2
cluster_1	chr1_16048208_16049253	28.8887590595826	19.3201948508024	15.4468848526145	9.84505908839165	0.712900274565331	Promoter (<=1kb)	CLCNKB
cluster_1	chr1_160651916_160652893	13.4212153728647	9.04878506984255	5.62797759364639	2.4197941882976	0.645872850231677	Distal Intergenic	SLAMF1
cluster_1	chr1_160675465_160676093	10.6461983836725	2.78249402297693	4.60317065189624	3.55447352490009	0.773846311640221	Intron (ENST00000598917.6/ENST00000598917.6, intron 1 of 5)	SLAMF1
cluster_1	chr1_160681347_160682075	14.0008210296196	5.4199382959879	4.79357484934073	2.99142633818773	0.919305077967934	Exon (ENST00000368046.8/962, exon 3 of 4)	CD48
cluster_1	chr1_160954135_160955109	12.5534043455623	3.45209035868848	1.71815395067644	2.38082390350782	0.949017009977947	Promoter (<=1kb)	ITLN2
cluster_1	chr1_160971566_160972265	10.6949366356267	4.99705757118706	4.21864934620314	2.01764806733857	0.820906303300531	Distal Intergenic	ITLN2
cluster_1	chr1_160981264_160982575	26.6342949631388	2.55901243130607	1.82809656425183	1.5647447477464	0.940240692988243	Distal Intergenic	F11R
cluster_1	chr1_161013545_161014234	14.1532352732305	1.63294830162347	1.61551874757578	1.93181268563823	0.902908804352587	Intron (ENST00000368026.11/50848, intron 1 of 9)	F11R
cluster_1	chr1_161020065_161021700	38.2089479046321	12.364104898309	11.8492587548361	12.7128677920392	0.910745109601145	Promoter (<=1kb)	F11R
cluster_1	chr1_161038227_161039219	22.9314275942511	8.83424816737099	11.6162551400335	8.53312381044269	0.809427402895086	Promoter (<=1kb)	TSTD1
cluster_1	chr1_161198245_161198719	26.8096901638116	8.83725665164449	9.41718440248722	5.8491215773249	0.906309412561548	Promoter (<=1kb)	ADAMTS4
cluster_1	chr1_161198874_161199251	21.5285735873834	5.41781389235546	3.73135274700489	4.14392681641177	0.959864139642549	Promoter (<=1kb)	ADAMTS4
cluster_1	chr1_161200582_161201247	12.6768503652676	4.09471637876468	4.88190120647362	3.34946305535339	0.881641044893209	Promoter (<=1kb)	NDUFS2
cluster_1	chr1_161305728_161306705	40.0195458465403	17.1268157056834	11.4753046211081	8.77941238933289	0.922684357692389	Promoter (<=1kb)	MPZ
cluster_1	chr1_16162342_16162979	22.8684089874852	11.2458330632071	6.26422632011851	2.25470003097944	0.781184282284313	Distal Intergenic	EPHA2-AS1
cluster_1	chr1_162091590_162092580	26.5994065492886	16.6944116102193	9.52882688206361	2.77245575323	0.659240139809597	Intron (ENST00000361897.10/9722, intron 1 of 9)	NOS1AP
cluster_1	chr1_16212357_16212976	29.0532707404925	5.90925202886324	4.1325837954291	3.85703398878847	0.966030199594918	Promoter (<=1kb)	ARHGEF19
cluster_1	chr1_16215875_16216679	43.0806055014305	22.4113659752601	16.5227438455014	9.12237287219355	0.808161320695743	Promoter (<=1kb)	ANO7L1
cluster_1	chr1_162197619_162198572	13.107309722506	2.38584048473368	1.23000536472607	2.51916509936863	0.900483415584995	Intron (ENST00000361897.10/9722, intron 2 of 9)	LOC105371475
cluster_1	chr1_162229984_162230534	19.507585056483	7.18299102199642	2.28894634111264	3.240022693071	0.891406312594117	Intron (ENST00000361897.10/9722, intron 2 of 9)	LOC105371475
cluster_1	chr1_16226394_16227483	24.5360736760823	14.4042686312332	9.60416947028397	5.33170063971818	0.749075833737241	Promoter (<=1kb)	ANO7L1
cluster_1	chr1_162822234_162823216	20.6835949218542	6.10193554686007	7.00650648241897	7.87481629703062	0.834995728763857	Distal Intergenic	HSD17B7
cluster_1	chr1_1628697_1629441	21.1505603995225	4.6551867885662	2.34935861349515	2.66762213951504	0.971836127711305	Promoter (<=1kb)	MIB2
cluster_1	chr1_1630205_1630692	22.3964401596263	9.6969228510706	4.66703114629043	1.85049370273617	0.830263374160812	Promoter (<=1kb)	MIB2
cluster_1	chr1_163202773_163203647	25.1973358522365	7.7479367923693	4.56910827643825	6.61520905017602	0.923574350270873	Promoter (<=1kb)	RGS5
cluster_1	chr1_163399841_163400572	27.8800091134798	1.62494374670768	3.24247295854421	6.51685177599489	0.791840841234012	Distal Intergenic	NUF2
cluster_1	chr1_164605074_164605664	14.53261438065	3.74318737657105	1.89861429574303	1.11543058904338	0.969795141422958	Promoter (<=1kb)	PBX1
cluster_1	chr1_16490846_16491759	8.85860924541972	5.65759806395215	3.21308578340173	1.87024082026895	0.701627798423743	Promoter (<=1kb)	CROCCP3
cluster_1	chr1_16532525_16533030	19.7730786009184	11.3512988233983	5.36894054231525	1.4366878862054	0.700429938017741	Promoter (2-3kb)	LINC01783
cluster_1	chr1_165933451_165934182	6.99623408117373	3.26511756707785	2.42793975276656	1.04421754493393	0.814683435412976	Distal Intergenic	MIR3658
cluster_1	chr1_16618796_16619141	32.9676970218096	4.70747373575753	4.89302776226766	3.11152819625511	0.933189203623256	Exon (ENST00000639481.1/84809, exon 4 of 4)	NBPF1
cluster_1	chr1_16620341_16621452	40.0737607113613	30.0536606599783	16.0440387361057	12.6548131747874	0.637891330072425	Intron (ENST00000639481.1/84809, intron 2 of 3)	CROCCP2
cluster_1	chr1_16624942_16625291	31.9013464985079	9.91050656472791	5.24737995019067	6.71455075656386	0.950356585010354	Promoter (1-2kb)	CROCCP2
cluster_1	chr1_166883866_166884716	13.7293065622814	6.96346276528904	5.72273859985528	2.99584579682462	0.807103831823457	Distal Intergenic	TADA1
cluster_1	chr1_166920366_166921569	15.3748412453582	2.84238657024759	2.68439913712543	3.43692373499437	0.889512561974949	Exon (ENST00000271417.8/387597, exon 9 of 10)	TADA1
cluster_1	chr1_16707301_16708314	10.7842784497547	6.78960589011767	3.61394492099499	3.35216704541673	0.752646163673772	Promoter (2-3kb)	ESPNP
cluster_1	chr1_167121211_167122132	14.7319663322445	5.81085148307001	5.25975879173196	6.32391263886942	0.878732248630892	Intron (ENST00000361200.7/92235, intron 5 of 5)	STYXL2
cluster_1	chr1_167430130_167431951	10.3713377241867	3.97355324791299	3.6591208216666	3.13821331407382	0.965360250105111	3' UTR	CD247
cluster_1	chr1_167683781_167684421	9.93850433423555	3.21221849606293	2.48877993629086	5.42223098326663	0.669450371020184	Exon (ENST00000537350.5/92241, exon 2 of 6)	MPZL1
cluster_1	chr1_167803262_167803940	20.1297124836139	1.55363263361196	2.26606369133633	4.21649912806372	0.823084977942434	Distal Intergenic	MPZL1
cluster_1	chr1_168082165_168082717	14.1362936996878	5.95340534914045	5.50818290889001	4.89172436193933	0.967812593957123	3' UTR	GPR161
cluster_1	chr1_168145502_168146264	9.24756693849658	4.97725929840561	3.55887084841004	4.3960950517069	0.879716776431789	Distal Intergenic	GPR161
cluster_1	chr1_168342462_168343090	11.6640286963539	6.33174629129805	3.30378401198879	7.72317234430838	0.59670122009205	Intron (ENST00000636624.1/ENST00000636624.1, intron 1 of 3)	MIR557
cluster_1	chr1_16921275_16922175	49.3125707570333	29.6881420060205	24.2379734527514	13.9896904379246	0.747532842098258	Promoter (<=1kb)	CROCC
cluster_1	chr1_16938633_16939995	19.8488158819975	11.271315539801	4.65198398122302	2.80581286811451	0.736077009106923	Promoter (<=1kb)	CROCC
cluster_1	chr1_169586109_169586967	12.6631269431418	5.21457203136909	5.07103968344393	5.8843394826196	0.860427698505323	Promoter (<=1kb)	F5
cluster_1	chr1_16960541_16961432	26.7352976820746	10.1967112016689	12.2663731145418	14.1009397561123	0.750881287318615	Exon (ENST00000375541.10/9696, exon 27 of 37)	CROCC
cluster_1	chr1_170094371_170095250	7.76627478416232	2.49682175584539	0.527561837034146	1.32199641339868	0.887542810928878	Distal Intergenic	KIFAP3
cluster_1	chr1_17118967_17120411	14.2310533907447	10.6325014411158	8.88320429150171	3.47661976677281	0.548228219843242	Promoter (<=1kb)	PADI2
cluster_1	chr1_171219807_171221118	18.9388579836621	13.1118079049816	9.80971999575791	5.34768887972418	0.656309958658852	Intron (ENST00000669750.1/105371611, intron 2 of 4)	FMO2
cluster_1	chr1_171431723_171432661	16.5619694935896	1.23605940457214	1.22907299487338	2.26758037934558	0.876227349254338	Distal Intergenic	PRRC2C
cluster_1	chr1_171641174_171642013	18.7236033905021	2.11007655499713	1.96207264982934	2.77093865999835	0.894193098353402	Intron (ENST00000638471.1/4653, intron 2 of 3)	MYOC
cluster_1	chr1_171644864_171645556	21.0505160273209	6.92899640536109	6.49620359679687	7.4238925435602	0.897567052577427	Intron (ENST00000638471.1/4653, intron 1 of 3)	MYOC
cluster_1	chr1_171655249_171655866	10.8637044024931	3.10653876088002	2.39764552063706	7.92994541313128	0.503133858209	Promoter (2-3kb)	MYOC
cluster_1	chr1_171909276_171910599	8.25462882044863	1.65070563301241	1.95861120233036	1.43686749469015	0.909074551872566	Intron (ENST00000688173.1/26052, intron 1 of 14)	DNM3-IT1
cluster_1	chr1_17236968_17237666	14.1204874456921	8.68418695099845	5.58446082884018	5.95111493378405	0.829121533203444	Promoter (1-2kb)	PADI1
cluster_1	chr1_173669093_173670071	18.6564337405409	11.2094562902867	13.3972201672963	6.90476689779349	0.6093782361878	Promoter (<=1kb)	ANKRD45
cluster_1	chr1_173861470_173863327	23.0952966165521	5.80339671235475	2.48228229256728	1.53529393769364	0.967490223589673	Promoter (1-2kb)	GAS5
cluster_1	chr1_17406078_17406579	22.2479258395647	11.7048008943908	8.29917202465969	4.08196192909349	0.784376904612343	Promoter (<=1kb)	RCC2-AS1
cluster_1	chr1_174238587_174239462	13.0566019889883	4.21942740015377	4.06943985066362	3.58524437651418	0.94627429642069	Promoter (<=1kb)	RABGAP1L
cluster_1	chr1_17469750_17470897	19.6575870718306	0.607857590836004	0.483615783467371	0.843535445802875	0.90997429268492	Distal Intergenic	RCC2
cluster_1	chr1_174871920_174872639	10.589289635777	1.45371218932602	2.96064192487364	1.81105019571818	0.827290395796689	Promoter (1-2kb)	RABGAP1L
cluster_1	chr1_17494034_17494685	20.7334319232882	3.25383272404151	1.24370825990533	3.36856650500996	0.902474310638755	Distal Intergenic	ARHGEF10L
cluster_1	chr1_175129635_175130797	17.1441624290532	10.1488710235211	10.0918277607579	2.56069839507558	0.598282813150421	Intron (ENST00000239462.9/63923, intron 15 of 18)	KIAA0040
cluster_1	chr1_175146498_175147200	17.3432193036096	5.86631083685268	3.89833505773167	5.30489702788166	0.918483796045432	3' UTR	KIAA0040
cluster_1	chr1_175191993_175193497	17.9236114973495	6.67070245232788	8.42966679206171	11.4306446682348	0.623818148602143	Promoter (<=1kb)	KIAA0040
cluster_1	chr1_17547030_17547619	16.4407477952478	4.19775904210379	2.44418787005848	1.72503955214971	0.981919403628402	Intron (ENST00000361221.8/55160, intron 1 of 28)	ARHGEF10L
cluster_1	chr1_175865119_175865895	22.4007861976918	2.95232855051038	1.04554087011765	2.91428807861692	0.913223957304272	Distal Intergenic	LINC01657
cluster_1	chr1_17587575_17588744	11.6011647887751	6.197883917194	3.58664124942311	5.14556972897896	0.822977915635696	Exon (ENST00000361221.8/55160, exon 3 of 29)	ARHGEF10L
cluster_1	chr1_175887533_175888559	13.9667933707075	6.48045538531645	6.98833418936741	4.96666025782615	0.867643786941195	Distal Intergenic	LINC01657
cluster_1	chr1_176948944_176949469	17.0625991557621	6.47355690882343	4.69838402365146	2.92073630495975	0.927064885939066	Exon (ENST00000367657.7/460, exon 12 of 23)	MIR488
cluster_1	chr1_177044263_177044921	19.9345321425097	3.72634869329485	3.46252721232433	1.32790694630876	0.944249819784643	Intron (ENST00000367657.7/460, intron 2 of 22)	ASTN1
cluster_1	chr1_177945899_177946574	11.2923311910543	5.35027968865222	4.48014552313417	5.98705658704551	0.818038418836851	Promoter (2-3kb)	SEC16B
cluster_1	chr1_1779999_1780532	25.8587631923925	4.81520505393053	3.73110882060049	2.1948015408254	0.966624381536623	Promoter (<=1kb)	NADK
cluster_1	chr1_178037401_178038306	26.0870769882933	8.62072647334999	6.06209899818459	8.08826265992353	0.916948759485448	Promoter (<=1kb)	CRYZL2P-SEC16B
cluster_1	chr1_1782098_1783268	19.3317093288637	6.09834122446571	2.45957117390982	12.3066308253517	0.558107614904703	Promoter (1-2kb)	NADK
cluster_1	chr1_178266480_178267166	45.2491623642916	4.33352574574794	2.8094000056663	2.21465889576825	0.945948391324553	Intron (ENST00000367649.8/9462, intron 1 of 17)	RASAL2
cluster_1	chr1_178282906_178283900	15.1927354590911	1.04194575315239	1.78919422550459	2.0011358042841	0.868359766697597	Exon (ENST00000367649.8/9462, exon 2 of 18)	RASAL2
cluster_1	chr1_178320079_178320927	17.7997521747121	6.82280389254259	6.42798393477605	5.21701031918595	0.956366971625276	Intron (ENST00000367649.8/9462, intron 3 of 17)	RASAL2
cluster_1	chr1_178501654_178502094	15.9071942400616	7.27665596670308	6.55944373628512	2.90127713511385	0.807515643612795	Promoter (2-3kb)	CLEC20A
cluster_1	chr1_178575593_178576294	9.69802082703869	3.14581411087604	3.47244604431043	4.97627977890609	0.725081602013198	Distal Intergenic	C1orf220
cluster_1	chr1_178581213_178582275	14.4635725363106	3.92391013164383	3.60396662431095	2.37129206182722	0.952916940209566	Distal Intergenic	C1orf220
cluster_1	chr1_179087551_179088323	14.3895010651446	3.77612057839421	1.20237491488942	1.97948936864056	0.942853146286899	Promoter (1-2kb)	TOR3A
cluster_1	chr1_179529337_179530091	23.8705050109171	1.17382971859492	0.934778193268259	0.377423146695074	0.933071165001584	Intron (ENST00000617277.4/126859, intron 22 of 24)	AXDND1
cluster_1	chr1_179575249_179576250	11.1279232488844	4.58533809092672	3.62189913519809	1.98120392445957	0.88798212249177	Promoter (<=1kb)	NPHS2
cluster_1	chr1_179586071_179586844	16.8144597870539	8.23092770035523	6.79632726140353	6.05727918828048	0.966028090201009	Exon (ENST00000427215.2/ENST00000427215.2, exon 1 of 1)	TDRD5
cluster_1	chr1_179591437_179592480	16.3901209078526	3.9950452472614	1.62253924090359	2.38672364541317	0.95426530632622	Promoter (<=1kb)	TDRD5
cluster_1	chr1_18009103_18009984	5.28089704525048	2.53476915525925	1.24597142974412	2.4626171125427	0.759522112070627	Distal Intergenic	LOC105376812
cluster_1	chr1_180167828_180168658	21.1336560393556	2.97988586160914	1.3994494552137	1.63668988492066	0.959384394444858	Intron (ENST00000367602.8/5768, intron 2 of 11)	QSOX1
cluster_1	chr1_180234484_180235294	23.930499947703	9.02561977849046	5.77712057715749	4.94799218279732	0.956610101845151	Intron (ENST00000263726.4/89884, intron 1 of 5)	LHX4
cluster_1	chr1_180269946_180270548	20.0959936464409	4.14567004720415	3.91014181833298	3.38544925831682	0.938826246218516	3' UTR	LHX4-AS1
cluster_1	chr1_180923008_180923878	42.3376485266	16.6145532407008	15.8192323704339	9.93636087911362	0.908040456309527	Intron (ENST00000367588.9/57710, intron 3 of 8)	KIAA1614
cluster_1	chr1_181038341_181038952	18.0002854543619	2.76774366990683	1.87198766198489	5.01665109986495	0.811811795443308	Intron (ENST00000614012.5/3140, intron 2 of 6)	MR1
cluster_1	chr1_181101506_181102288	26.8326127669897	6.28405891107577	2.48194715281028	6.95803383833607	0.856953006179477	Distal Intergenic	IER5
cluster_1	chr1_181128420_181129194	12.4766881781049	8.72203802715608	8.01466491124899	2.62544779384026	0.548670138636859	Distal Intergenic	IER5
cluster_1	chr1_181482292_181483278	15.9092467479863	9.5856304920106	6.85269072802368	6.51616339219424	0.865122642115942	Promoter (<=1kb)	CACNA1E
cluster_1	chr1_181969664_181970689	21.4941683683389	1.90936099235636	1.51152127568931	2.08667445234988	0.91334637848194	Intron (ENST00000671017.1/ENST00000671017.1, intron 1 of 1)	ZNF648
cluster_1	chr1_182611769_182612225	15.5584458099643	10.3820417401107	7.17307416723865	1.49930087124741	0.598823834650778	Distal Intergenic	LINC01686
cluster_1	chr1_182662146_182662984	9.58474790525682	4.53063445536222	2.33894275797126	1.44197220173824	0.832405914290753	Intron (ENST00000258302.8/85397, intron 4 of 5)	RGS8
cluster_1	chr1_182806030_182806686	15.8785896446811	4.11844768057796	2.80147205939494	2.04705771072747	0.983423765131139	5' UTR	NPL
cluster_1	chr1_18294580_18295306	28.284795622848	1.80115882399528	0.898033498261142	1.0626938338805	0.934574657921905	Intron (ENST00000251296.4/84966, intron 3 of 9)	IGSF21
cluster_1	chr1_182957753_182958445	21.621770439152	0.741452707495727	0.706005385569298	1.25998881194081	0.90240434587417	Distal Intergenic	SHCBP1L
cluster_1	chr1_18298131_18298912	27.6459719442509	3.92770867286343	1.31672164673716	1.3460567639693	0.97342660669581	Intron (ENST00000251296.4/84966, intron 3 of 9)	IGSF21
cluster_1	chr1_183185695_183186588	23.4699335888635	7.05644736058051	7.08635461324185	4.13167029845958	0.9232168895571	Promoter (<=1kb)	LAMC2
cluster_1	chr1_183330994_183332035	16.2208015635311	5.70710266513196	6.94950297380068	4.30819975014684	0.852860606530208	Intron (ENST00000287713.7/23057, intron 1 of 10)	NMNAT2
cluster_1	chr1_18418508_18420278	13.4587721900174	1.51368436679074	0.868331556064439	1.09198614360314	0.939850126257481	Distal Intergenic	IGSF21
cluster_1	chr1_184497840_184498456	15.706180876322	5.30449957264586	3.34760878385094	1.60072569364561	0.921032887259471	Intron (ENST00000235307.7/81563, intron 2 of 5)	C1orf21
cluster_1	chr1_184663829_184664606	21.5581501315676	11.4070556526951	9.53975200046553	7.75345729936118	0.918253810053469	Promoter (<=1kb)	LOC105371648
cluster_1	chr1_185733755_185734865	25.4173385306437	11.5820704472478	12.6021624371248	6.97476094950012	0.807145632603318	Promoter (<=1kb)	HMCN1
cluster_1	chr1_18575524_18576098	15.1290404176476	5.40214257689204	3.56842571664499	2.75914671218167	0.959572760381642	Distal Intergenic	PAX7
cluster_1	chr1_185912045_185912955	14.4379004136894	0.532093107642145	1.21326043533692	1.7896355259059	0.856291480382742	Intron (ENST00000271588.9/83872, intron 6 of 106)	HMCN1
cluster_1	chr1_18637552_18637978	15.0916975454394	11.8278043293945	5.42362409406081	1.06471161303625	0.547688691439659	Intron (ENST00000420770.7/5081, intron 4 of 8)	PAX7
cluster_1	chr1_18651733_18652473	22.162429622064	5.45045067138065	2.46277767823777	1.64096833260947	0.97387051569774	Intron (ENST00000420770.7/5081, intron 4 of 8)	PAX7
cluster_1	chr1_186637205_186638024	12.4386349888171	3.50917408256635	3.66269331665759	2.80831781062121	0.930681582851	Distal Intergenic	PTGS2
cluster_1	chr1_186679987_186681158	25.8407382955349	11.2931856187359	9.74389665279226	15.9086252923421	0.677310122808903	Promoter (<=1kb)	PACERR
cluster_1	chr1_18693532_18694268	23.0332291185399	5.15534253279727	2.48763785326015	3.09484428240595	0.966154066621361	Intron (ENST00000420770.7/5081, intron 5 of 8)	PAX7
cluster_1	chr1_18702893_18703722	15.7288454387151	4.36385969168617	1.895415813717	2.15851451254945	0.962071811282503	Exon (ENST00000420770.7/5081, exon 7 of 9)	PAX7
cluster_1	chr1_18784004_18785352	6.26735311673548	3.12092810359256	1.85870108660575	1.99790695253946	0.890112185295903	Distal Intergenic	TAS1R2
cluster_1	chr1_18912970_18913597	17.3701446537768	10.4819801966065	4.55059635852597	5.01872363262931	0.749314693281368	Promoter (<=1kb)	IFFO2
cluster_1	chr1_193216840_193217418	15.9756473521046	2.90351963270164	1.06598073968484	1.81366505557584	0.952405415265548	Intron (ENST00000649895.1/79577, intron 13 of 15)	CDC73
cluster_1	chr1_19338115_19338805	22.7731151155294	8.65289392044206	6.3172534137664	3.89989816673481	0.925955173764474	3' UTR	CAPZB
cluster_1	chr1_19353433_19354101	27.0737238337217	2.81023440074672	1.7378908033933	1.68744181901445	0.944629582885557	Intron (ENST00000264202.8/832, intron 6 of 8)	CAPZB
cluster_1	chr1_195847846_195848834	20.5028463789541	2.79729280094606	2.14467698417336	0.312786219263413	0.957938378038005	Distal Intergenic	LOC105371672
cluster_1	chr1_1959723_1960660	24.3521565139554	8.40261771296244	7.9158450770421	6.92856613992198	0.955391182212251	Promoter (<=1kb)	CFAP74
cluster_1	chr1_19653516_19654362	21.9065156367364	9.1432515307883	5.84252918607279	6.16047364326978	0.947709917459542	Intron (ENST00000602662.1/100532736, intron 1 of 3)	NBL1
cluster_1	chr1_19659567_19660211	31.2894604448527	22.0953429366439	18.0681330461909	9.65454445627239	0.63397718468077	Distal Intergenic	HTR6
cluster_1	chr1_19665488_19666389	11.9805336864933	2.57473910424455	2.57788156722803	2.69005897409509	0.908965593924822	Promoter (<=1kb)	HTR6
cluster_1	chr1_196786018_196786997	11.7443175144977	2.27328449569654	3.10682725007545	1.61468670301848	0.885828236021638	Promoter (2-3kb)	CFHR3
cluster_1	chr1_196877885_196878460	18.6948901949996	5.00773311732009	4.73051900847002	4.45950426558752	0.937537036312321	Intron (ENST00000649395.1/ENST00000649395.1, intron 3 of 3)	CFHR4
cluster_1	chr1_196897026_196897964	8.35966319150106	1.67404883820111	2.87256317893151	1.17170616095874	0.818164029550962	Promoter (<=1kb)	CFHR4
cluster_1	chr1_19704040_19704999	14.7016983026424	7.45502055035957	7.69774254611297	4.59884516916672	0.803308494459768	Promoter (2-3kb)	TMCO4
cluster_1	chr1_19715471_19716087	31.512500954906	15.7523491419079	10.9695455363002	10.6823138391257	0.926299942979331	Intron (ENST00000375127.5/255104, intron 12 of 15)	TMCO4
cluster_1	chr1_197911133_197912002	15.8418903485472	5.96155737408165	5.07137313788885	3.302964104497	0.935132999055703	Promoter (<=1kb)	LHX9
cluster_1	chr1_19816439_19817537	10.3238808694291	1.246337528689	0.561445383976551	1.62801823279911	0.887317603594373	Promoter (1-2kb)	RNF186
cluster_1	chr1_198314582_198315465	24.9521827907218	3.43958957629079	1.44834695383164	2.3165391353094	0.946785120975104	Intron (ENST00000538004.5/140609, intron 9 of 9)	NEK7
cluster_1	chr1_19989900_19990672	22.6299867413589	1.54931441070653	1.21390068992942	0.808302370905273	0.934512047281768	Distal Intergenic	PLA2G2A
cluster_1	chr1_200038449_200039992	34.2930192007303	14.0234538932035	11.9847644617486	7.6163657835218	0.914437658959338	Promoter (2-3kb)	NR5A2
cluster_1	chr1_200048037_200048814	34.9674760981423	2.92915235633011	1.89569855133106	1.24470634770637	0.945232038197097	Exon (ENST00000236914.7/2494, exon 4 of 7)	NR5A2
cluster_1	chr1_200129123_200129997	8.08289048456552	1.54332245239981	1.51712871694245	3.76907603654675	0.67729246008813	Intron (ENST00000236914.7/2494, intron 6 of 6)	NR5A2
cluster_1	chr1_200364209_200365400	23.7584047383914	2.35168326503728	0.719930052748246	6.83386184994526	0.761296753016105	Intron (ENST00000637430.1/ENST00000637430.1, intron 4 of 5)	LINC00862
cluster_1	chr1_200411474_200412080	26.5039208484599	5.91405990984302	10.3233588582237	2.90146178918143	0.776931316946322	Promoter (1-2kb)	ZNF281
cluster_1	chr1_200488445_200489200	10.7346037875011	4.66940403492233	3.93445883711574	4.73035895641396	0.898025105493017	Distal Intergenic	ZNF281
cluster_1	chr1_200802781_200803356	16.160342616099	4.39202610359524	8.30442054369427	5.33790942473827	0.71048742127148	Intron (ENST00000358823.7/23271, intron 2 of 16)	CAMSAP2
cluster_1	chr1_200890876_200892219	24.9434474244336	17.7864101612226	16.7066800569594	7.83264476365605	0.575321039374707	Promoter (<=1kb)	INAVA
cluster_1	chr1_200915794_200916893	19.1788191358225	2.04459810057788	1.0509274355821	2.92565102084061	0.883736699209542	Promoter (<=1kb)	MROH3P
cluster_1	chr1_201014017_201014915	21.7574316444941	7.72373921193075	5.21052250507423	3.91518551435498	0.959440212560806	Intron (ENST00000332129.6/23046, intron 1 of 33)	KIF21B
cluster_1	chr1_201126906_201127820	11.2406481148845	4.07044686437975	2.61872158594208	1.69545907448304	0.935055032010581	Promoter (<=1kb)	ASCL5
cluster_1	chr1_201259319_201260436	18.0719291158083	2.57218927979376	2.04819349905508	2.68177117323367	0.915182755118134	Distal Intergenic	PKP1
cluster_1	chr1_201282931_201283913	12.4718384536278	2.45606293679074	1.12174359440154	2.19539332845787	0.918930199660425	Promoter (<=1kb)	PKP1
cluster_1	chr1_201347513_201348554	18.5364380121949	2.67420834315391	1.75874699021329	1.36367200921444	0.961350081852217	Distal Intergenic	TNNT2
cluster_1	chr1_201376238_201377251	42.7848279121469	9.29210432918759	6.99131994741009	6.40356856530381	0.964334097399462	Promoter (<=1kb)	TNNT2
cluster_1	chr1_201399122_201399959	19.1420045885393	6.11650072003306	4.97241906805083	9.4647314987956	0.723576178709671	Promoter (<=1kb)	LOC101929343
cluster_1	chr1_201408115_201408833	12.0160337920995	10.8344386624403	5.07915258551775	5.2743985842467	0.529245040856686	3' UTR	LAD1
cluster_1	chr1_201481633_201482507	32.7825073620113	17.954695273769	14.0191659125386	14.4303282533424	0.944939304485722	Distal Intergenic	CSRP1
cluster_1	chr1_201500204_201500977	13.3882576360581	5.40694593548967	2.87582111145944	7.51405856567128	0.658401414068502	Intron (ENST00000340006.7/1465, intron 1 of 5)	CSRP1
cluster_1	chr1_201614097_201614810	14.9351370529996	7.04313102407505	5.66706328402331	4.22834525852606	0.917758873379218	Intron (ENST00000685211.1/89796, intron 2 of 33)	NAV1
cluster_1	chr1_201676157_201676669	14.9006404463636	6.6730925944612	3.49896366729571	7.07012383404696	0.75727640737261	Intron (ENST00000685211.1/89796, intron 5 of 33)	NAV1
cluster_1	chr1_201678602_201679420	13.9472755053996	4.49939360677582	2.15146534326657	1.45685250048522	0.938028089293148	Intron (ENST00000685211.1/89796, intron 5 of 33)	NAV1
cluster_1	chr1_201894346_201895164	10.6452905084734	3.82589770834794	2.16759400742023	1.27653429566821	0.918858409122003	Intron (ENST00000414927.5/ENST00000414927.5, intron 1 of 2)	SHISA4
cluster_1	chr1_202007986_202008524	26.1749353336378	5.56820158607832	2.19234369177835	2.27562494835425	0.977644501339658	Promoter (<=1kb)	ELF3
cluster_1	chr1_202009536_202010972	32.8873990701816	19.8069286722213	12.4700364421066	7.84588316858989	0.750639471344638	Promoter (<=1kb)	ELF3-AS1
cluster_1	chr1_202105476_202106175	27.157016545165	24.249753322367	12.0897413729688	7.04416052040536	0.511874104526018	Distal Intergenic	GPR37L1
cluster_1	chr1_202118819_202119398	16.6546255829593	10.4483988598914	5.79215675540107	7.13660527492481	0.776550716405377	Distal Intergenic	GPR37L1
cluster_1	chr1_202122549_202123120	22.062057930926	12.1403087387581	7.44271952118481	10.6629390704884	0.811140128574146	Promoter (<=1kb)	GPR37L1
cluster_1	chr1_20212765_20213530	15.4431389464605	8.46176090985897	4.43463960704755	8.45633945121783	0.70556047103667	Distal Intergenic	PLA2G2C
cluster_1	chr1_202184558_202185320	35.74392675181	10.2527142218048	8.6630669090001	7.65032849006582	0.967901484003826	Promoter (<=1kb)	PTPRVP
cluster_1	chr1_202192779_202193281	14.9252431986802	4.50935084679245	4.82680077172834	3.27374896362993	0.919794800070639	Promoter (<=1kb)	LGR6
cluster_1	chr1_202193607_202194372	10.4955463292745	8.0922786359974	3.61470206217426	2.49502812363722	0.597914265580144	Promoter (<=1kb)	LGR6
cluster_1	chr1_202213390_202214701	20.4453851076884	5.59372229226069	3.63559755596979	4.89661717968901	0.933218037368526	Promoter (<=1kb)	LGR6
cluster_1	chr1_202236990_202237503	25.8982523667495	9.11765723493932	4.40940568711492	5.02312381848226	0.938535039861023	Intron (ENST00000367278.8/59352, intron 4 of 17)	LGR6
cluster_1	chr1_202315482_202315969	11.2641231084729	4.47508972925516	6.50853125938144	7.04655500739303	0.624586205031889	Intron (ENST00000367278.8/59352, intron 17 of 17)	UBE2T
cluster_1	chr1_202711783_202712514	12.5670546953519	4.63391888048058	3.46648680913674	2.62681895823231	0.963399165237043	Promoter (1-2kb)	SYT2
cluster_1	chr1_203039195_203039772	16.1757247217169	6.93319131075025	4.34047791524526	5.81831138690585	0.901566231048032	Exon (ENST00000688357.1/8497, exon 2 of 30)	PPFIA4
cluster_1	chr1_203048477_203049181	16.7091291193841	6.73633017996255	3.75502018256615	1.6590606654145	0.865499050388084	Promoter (2-3kb)	PPFIA4
cluster_1	chr1_203075195_203076519	9.3702411826979	3.98886134558955	3.07249768642825	2.41223615475739	0.948841829499216	Promoter (<=1kb)	PPFIA4
cluster_1	chr1_203117514_203118199	17.4612328756936	8.84608798617255	5.64357028707949	6.44433156144884	0.899325717449383	Exon (ENST00000665660.1/ENST00000665660.1, exon 3 of 3)	ADORA1
cluster_1	chr1_203216128_203216980	10.8689157819236	4.57451773918609	3.15101464304955	2.83391616565388	0.954444643515292	Promoter (1-2kb)	CHIT1
cluster_1	chr1_203307552_203308186	24.763206826469	7.49555258451768	7.71686364220995	2.65815167979043	0.870632381702076	Promoter (2-3kb)	BTG2
cluster_1	chr1_203320776_203321469	9.00443652571509	4.68358131248467	2.59567049543876	4.63265696695481	0.746784612906437	Distal Intergenic	BTG2
cluster_1	chr1_203487257_203488289	40.1390705078425	21.0804358473996	18.8039636665948	10.8540730358351	0.808119301185709	3' UTR	OPTC
cluster_1	chr1_203519136_203519844	27.5489095768945	3.19932953600904	3.60825977760527	2.77285065389808	0.917973101438661	Distal Intergenic	OPTC
cluster_1	chr1_203984916_203985509	16.3453165735625	9.58056052357123	3.54121620410063	2.54571857640203	0.722218784074356	Distal Intergenic	LOC105371689
cluster_1	chr1_203996055_203997589	17.6836613374514	11.3912315511077	10.5418083980331	3.34851926410484	0.591197311904039	Promoter (<=1kb)	LOC105371689
cluster_1	chr1_204025926_204026834	6.78463861951511	4.67607104216303	4.87780543127981	1.31245743052309	0.503363015421243	Distal Intergenic	LINC00303
cluster_1	chr1_204065064_204066101	17.0389455084353	3.78756456860522	4.30512232350569	3.93493710088084	0.899286725638274	Exon (ENST00000665939.1/ENST00000665939.1, exon 2 of 2)	SOX13
cluster_1	chr1_204078105_204078959	25.2088241755412	11.558525801499	6.95977322359451	6.48377298885332	0.908544850293011	Promoter (<=1kb)	SOX13
cluster_1	chr1_204080036_204080872	45.9009847232231	15.0479708839672	10.6077668947131	6.88620741938087	0.957243622307594	Promoter (1-2kb)	SOX13
cluster_1	chr1_204084241_204084838	40.3184167082485	9.54501002415513	9.30409810796991	16.2329064615446	0.766927495595271	Intron (ENST00000367203.8/9580, intron 1 of 6)	SOX13
cluster_1	chr1_204094235_204094841	11.8275142288878	10.6740186555589	5.08992936542987	3.12221106248106	0.5084788431744	Intron (ENST00000367203.8/9580, intron 1 of 6)	SOX13
cluster_1	chr1_204213640_204214713	22.3547009598795	7.70591276827205	5.35645124781187	4.68112148405151	0.980442570124926	Promoter (<=1kb)	GOLT1A
cluster_1	chr1_204287923_204288622	12.694606362258	3.29340335656807	2.00253268926714	2.58537705634852	0.94887096700045	Intron (ENST00000272203.8/22874, intron 1 of 22)	PLEKHA6
cluster_1	chr1_204307304_204307919	19.803139262034	8.69789704971761	3.78539835654674	10.5778770420481	0.672110686876328	Promoter (<=1kb)	PLEKHA6
cluster_1	chr1_204377604_204378685	17.8987120947847	8.51404814147751	6.29338990736051	7.22796903358276	0.933623652424838	Promoter (<=1kb)	PLEKHA6
cluster_1	chr1_204398410_204398945	18.0479175679789	9.17485711501087	6.32184524659165	9.55823515990827	0.788301172941605	Promoter (2-3kb)	PPP1R15B
cluster_1	chr1_204445861_204447227	13.0244096237759	8.41362997051612	5.62705647819039	3.0666912593156	0.696294281810321	Promoter (2-3kb)	PIK3C2B
cluster_1	chr1_204481469_204482419	9.07621766834653	3.92548444801902	2.83504037040707	1.560193108679	0.874756300623143	Intron (ENST00000367187.7/5287, intron 2 of 33)	PIK3C2B
cluster_1	chr1_204576173_204576880	19.0054655711093	2.75888899633192	2.43547418571669	2.9340734217789	0.912319068609098	Distal Intergenic	LOC105371692
cluster_1	chr1_204692344_204693217	14.0142352992742	2.24478250693864	2.20908952062191	1.39520227975854	0.940388734301777	Distal Intergenic	LRRN2
cluster_1	chr1_204710121_204711150	26.9044721586254	14.2708598859111	12.9040678580342	3.74265075256699	0.690107488515729	Distal Intergenic	LRRN2
cluster_1	chr1_204714783_204715686	18.8561856761683	7.13787366026864	3.72462948405973	2.49499012522844	0.909169202590071	Distal Intergenic	LRRN2
cluster_1	chr1_20473089_20473740	14.6587018083285	8.84490019775006	8.07835746374469	1.84194684582091	0.604333438529742	Distal Intergenic	CAMK2N1
cluster_1	chr1_204923855_204924672	13.594059686956	4.92330088406504	4.29651549275266	2.4365345549027	0.916912940955158	Intron (ENST00000404977.6/23114, intron 2 of 25)	NFASC
cluster_1	chr1_20493730_20494925	12.8652524241141	5.99272322870213	4.85217976018141	3.83452765174182	0.937663309427303	Distal Intergenic	CAMK2N1
cluster_1	chr1_204991168_204991880	16.3335765413345	9.68852281301576	7.33906201116699	4.42746180873867	0.7653603824861	Promoter (2-3kb)	NFASC
cluster_1	chr1_205335550_205336109	13.1200090029345	5.1718535640007	3.2607611003902	3.78042605078238	0.94578773253427	3' UTR	KLHDC8A
cluster_1	chr1_205343330_205344614	14.7884627233265	12.1396375985125	7.08821877281257	6.51808253176756	0.607371781742342	Promoter (<=1kb)	KLHDC8A
cluster_1	chr1_205350421_205351273	18.2343646579785	7.74973714851854	8.27970534974072	4.44144812935327	0.829705927100888	Exon (ENST00000432323.1/ENST00000432323.1, exon 1 of 1)	KLHDC8A
cluster_1	chr1_205375884_205376612	14.3493086595442	8.23423525168166	6.71691675138272	3.53654901152084	0.751758598059678	Promoter (2-3kb)	LEMD1-AS1
cluster_1	chr1_205430385_205431210	13.575290428972	9.66620268631909	8.28379560683449	3.4670523075884	0.580902279144553	Intron (ENST00000367154.5/93273, intron 1 of 3)	LEMD1
cluster_1	chr1_205448457_205449034	48.7033854091696	16.7974977707587	13.2397999001675	3.57005646301865	0.86572863126397	Promoter (<=1kb)	MIR135B
cluster_1	chr1_205485219_205485953	17.6827930051581	9.65733978423802	7.32461549012843	7.22475679092364	0.932809264493183	Distal Intergenic	CDK18
cluster_1	chr1_205504244_205505582	24.8731955019192	10.9002291238602	9.97916057615714	7.9985015309211	0.953115790355959	Promoter (<=1kb)	CDK18
cluster_1	chr1_205528666_205529463	19.0038988570991	11.1286853125599	8.18762228639383	7.34369062489525	0.87497338227095	Promoter (<=1kb)	CDK18
cluster_1	chr1_205672064_205672461	28.6773784586366	9.92960001766059	8.36254343043576	10.8533213186851	0.880274500843581	Intron (ENST00000367145.4/85414, intron 1 of 4)	SLC45A3
cluster_1	chr1_205711101_205711843	13.0393239439484	6.18677179204382	4.47076077202625	3.46930102325503	0.909535271054909	Distal Intergenic	NUCKS1
cluster_1	chr1_206506941_206508337	17.4691050702843	9.21525236616215	6.87528358528128	6.1587420273956	0.918534360663386	Promoter (<=1kb)	RASSF5
cluster_1	chr1_206544531_206545196	13.4422020164694	6.18059004623707	3.84471712155311	3.72340099057067	0.918442521920409	Exon (ENST00000624347.1/ENST00000624347.1, exon 1 of 1)	RASSF5
cluster_1	chr1_206658199_206659424	10.2092585178487	3.86996816552662	2.64193723156746	1.26351435329586	0.894474357839514	Intron (ENST00000489878.1/8444, intron 3 of 3)	DYRK3
cluster_1	chr1_206663715_206664602	13.4984105005369	10.8135931767611	8.24626857513966	4.81173279784201	0.570478107397617	Intron (ENST00000489878.1/8444, intron 3 of 3)	MAPKAPK2
cluster_1	chr1_206687796_206688359	24.2540459723006	6.21710477610439	2.80979027502988	5.19103290238614	0.91537881736144	Promoter (2-3kb)	MAPKAPK2
cluster_1	chr1_206694456_206695111	10.5582190175689	5.03174526888818	3.02655480940647	5.17813223841774	0.779434982490259	Intron (ENST00000367103.4/9261, intron 1 of 9)	MAPKAPK2
cluster_1	chr1_207024876_207025596	13.6515108034864	4.30337647644245	1.78111381219766	4.87430612245335	0.800284233463648	5' UTR	C1orf116
cluster_1	chr1_207032393_207033141	36.2744947913973	3.47705446307616	1.40897268541329	12.6522116102259	0.712062195857489	Promoter (<=1kb)	C1orf116
cluster_1	chr1_20722365_20722829	22.81814677052	6.41177460068091	1.33113080759005	3.29503208549478	0.912626533510827	Exon (ENST00000444387.7/400745, exon 9 of 10)	KIF17
cluster_1	chr1_207453996_207455385	15.0123317503286	6.59970414540286	4.99842434103015	4.45651473526139	0.96537589832043	Promoter (<=1kb)	CR2
cluster_1	chr1_207633676_207634318	26.5272031964585	0.493599485697383	0.148727662908726	0.788432453738263	0.911387688344354	Intron (ENST00000400960.7/1378, intron 38 of 38)	CR1L
cluster_1	chr1_207910606_207911434	11.5328755666292	7.61958957388351	4.06453225409238	7.45391825176835	0.622665796726567	Promoter (<=1kb)	CD34
cluster_1	chr1_208131780_208132590	12.6677063022347	4.73006449677622	3.41026342026456	4.71609991562921	0.889180304477565	Intron (ENST00000367033.4/5362, intron 4 of 31)	LOC105372887
cluster_1	chr1_2091551_2092399	10.361429174228	4.74173005713039	2.0507328818983	2.09091590752063	0.856723191760602	Intron (ENST00000378567.8/5590, intron 4 of 17)	PRKCZ
cluster_1	chr1_209155228_209156031	9.18025357973577	3.22992459327649	1.38440015235054	1.34103048868399	0.924820447174124	Exon (ENST00000665387.1/ENST00000665387.1, exon 3 of 6)	LOC105372895
cluster_1	chr1_209157411_209158157	6.99659455698998	2.87921754691269	2.99930657928541	1.05901822298531	0.783882810387573	Intron (ENST00000665460.1/ENST00000665460.1, intron 1 of 2)	LOC105372895
cluster_1	chr1_209190448_209191264	10.2445220997572	6.65956373735238	4.57704112325976	4.54424687562539	0.818807814171424	Intron (ENST00000666483.1/105372896, intron 2 of 3)	LOC105372896
cluster_1	chr1_209198873_209200271	13.3767411771126	3.08378305058443	2.87984296423888	2.64320934887258	0.938496116153664	Intron (ENST00000666483.1/105372896, intron 2 of 3)	LOC105372896
cluster_1	chr1_209427861_209428955	27.0681707403854	9.59409717844007	6.39620467859874	1.71799990309697	0.871713337955264	Promoter (<=1kb)	MIR205HG
cluster_1	chr1_209565811_209566666	13.1440202607095	5.4797013659312	5.66372601417191	3.60581824847063	0.880239777359975	Promoter (1-2kb)	LOC105372898
cluster_1	chr1_209576367_209577199	13.5107098788485	4.78322282684203	4.60102784915088	3.67077974726311	0.950755364208299	Distal Intergenic	CAMK1G
cluster_1	chr1_209747480_209748489	40.562979267517	14.5427371955135	13.1920342721783	12.6864784695023	0.956291155716469	Distal Intergenic	TRAF3IP3
cluster_1	chr1_209805444_209806675	35.7129126550805	4.06890663216747	4.69392141635714	2.44124881045863	0.926097893885677	Promoter (<=1kb)	C1orf74
cluster_1	chr1_210373336_210374715	29.9406694050873	7.70202164773307	4.85865608531463	4.23541361981489	0.98548550352176	Exon (ENST00000364102.1/ENST00000364102.1, exon 1 of 1)	HHAT
cluster_1	chr1_211398277_211400547	13.3859676154289	2.4664687410052	2.05346067522996	2.17793207847062	0.934225095014906	Promoter (<=1kb)	LINC00467
cluster_1	chr1_2115445_2116702	10.9462516546097	6.89011746853073	4.9818107548225	3.37478048609517	0.756990189344257	Promoter (<=1kb)	PRKCZ
cluster_1	chr1_211630103_211630776	13.5683338055357	2.45861752253657	3.11170298458089	3.98909525197577	0.825079705638686	Distal Intergenic	NTRAS
cluster_1	chr1_211698389_211699484	14.9356006072174	7.21365686309513	7.53576870222907	5.91158016809249	0.898803799422135	Distal Intergenic	NEK2-DT
cluster_1	chr1_211928326_211929306	9.63102907835196	2.05222963852352	1.4885258591173	2.98560303668411	0.827093315079214	Distal Intergenic	INTS7
cluster_1	chr1_212126953_212127650	11.9995138698597	6.50445683278004	4.29406061661332	1.5109251706601	0.735935980344989	Distal Intergenic	DTL
cluster_1	chr1_212629962_212630965	12.1401625869097	7.10073619221321	4.94991740567609	3.82965544719119	0.82078427387766	Distal Intergenic	GARIN4
cluster_1	chr1_212658195_212658863	14.1634128059335	6.48753358757143	3.55301291736161	3.22963471623165	0.887594397760115	Intron (ENST00000653931.1/102723761, intron 2 of 2)	LINC02773
cluster_1	chr1_212759780_212760713	10.8832288092186	1.89694165242286	1.63079802104428	2.42346755236521	0.881763824019089	Intron (ENST00000366978.5/25936, intron 4 of 4)	NSL1
cluster_1	chr1_212908167_212908909	17.0181097652974	1.16494553512175	0.574195117724781	1.66896761992874	0.899460080867282	Distal Intergenic	FLVCR1
cluster_1	chr1_212909742_212910581	20.268627246291	1.32020002753403	0.850580703579459	0.66601445168599	0.936224456561632	Distal Intergenic	FLVCR1
cluster_1	chr1_212914698_212915699	18.3100794289408	3.89416705119445	4.3982676990737	2.80041357808347	0.920266966056094	Distal Intergenic	FLVCR1
cluster_1	chr1_212916544_212917340	25.7684224231274	4.35588214175677	3.17622421898531	6.25838876239831	0.856886893907831	Exon (ENST00000632866.1/ENST00000632866.1, exon 1 of 3)	FLVCR1
cluster_1	chr1_212928535_212929443	15.2987244812569	3.38153067733366	2.72738731677275	2.47183685759582	0.958649204603506	Distal Intergenic	VASH2
cluster_1	chr1_213231802_213232428	22.4864886002087	7.98111579274603	4.29290402712111	1.21050717003256	0.878868501237863	Exon (ENST00000543354.5/26750, exon 9 of 14)	RPS6KC1
cluster_1	chr1_213670086_213670945	18.7790374395025	1.4238293076416	1.08107798810963	1.85708918599879	0.903872033722481	Distal Intergenic	NA
cluster_1	chr1_213979649_213980401	21.0637775340283	8.68171480511772	6.48003202535977	4.02535294261657	0.908584664782043	Promoter (<=1kb)	PROX1-AS1
cluster_1	chr1_214224477_214225452	11.3991078584083	3.46857569743551	5.02929583175944	2.08420778866709	0.782065659759202	Distal Intergenic	LINC02775
cluster_1	chr1_214289559_214290312	18.3472995407845	4.34165209246402	4.81229597887787	3.48112657637914	0.920267176530487	Intron (ENST00000491455.5/56950, intron 1 of 10)	SMYD2
cluster_1	chr1_214316447_214317088	28.3900640979843	6.51618542618513	9.68228787558841	11.194164822873	0.761076058609019	Intron (ENST00000491455.5/56950, intron 3 of 10)	SMYD2
cluster_1	chr1_21436583_21437556	17.6624729204915	9.49120600917739	2.66749662629196	3.50295455151239	0.756855240035146	Promoter (2-3kb)	NBPF3
cluster_1	chr1_214404470_214405354	12.7781087225591	2.84279601591836	3.43026798813439	3.00972589955376	0.889479893026656	Intron (ENST00000366956.10/5784, intron 5 of 18)	PTPN14
cluster_1	chr1_214446678_214447468	24.5609212696473	2.77408016163963	4.00989769124504	8.17181655168041	0.748107289441793	Intron (ENST00000366956.10/5784, intron 3 of 18)	PTPN14
cluster_1	chr1_214514062_214515013	9.32301118082005	4.64932880481726	2.82717972461667	3.84543922475588	0.862645520601119	Intron (ENST00000366956.10/5784, intron 1 of 18)	PTPN14
cluster_1	chr1_214976590_214977658	4.90952254674538	4.2879211038282	1.82547306009585	0.586378526027143	0.508044347033112	Intron (ENST00000658732.1/ENST00000658732.1, intron 1 of 1)	KCNK2
cluster_1	chr1_21508913_21510586	26.465520711649	16.4679010050643	11.280088305058	6.01413566971155	0.714029344834109	Promoter (<=1kb)	ALPL
cluster_1	chr1_21607487_21608385	82.6302734484624	43.3009369883788	31.3970521708879	16.7891616382338	0.799180223740315	Exon (ENST00000374763.6/5909, exon 14 of 23)	RAP1GAP
cluster_1	chr1_216388452_216389042	9.94839308998972	3.92832654419081	4.44845027467232	1.08588269233991	0.74110257813003	Intron (ENST00000307340.8/7399, intron 3 of 71)	USH2A
cluster_1	chr1_216686835_216687632	9.50009804944586	4.12174229164898	2.46856165634681	1.41198823183873	0.868251146193321	Intron (ENST00000616180.4/2104, intron 1 of 6)	ESRRG
cluster_1	chr1_21814238_21814888	25.0359307715667	9.87826075990595	3.76239296038845	2.48837923972454	0.869406090748432	Promoter (1-2kb)	LDLRAD2
cluster_1	chr1_218346733_218347586	13.082139849459	6.94058760791823	4.94594315651637	8.88539874731009	0.627272603144251	Promoter (<=1kb)	TGFB2
cluster_1	chr1_21913100_21913660	11.6311730605394	3.86206326730939	2.79237952608399	5.81031867738756	0.716289582589518	Intron (ENST00000374695.8/3339, intron 1 of 96)	HSPG2
cluster_1	chr1_21922264_21923051	19.5719338168469	7.88023576602021	2.68480959792893	2.45493116756999	0.866372859152812	Intron (ENST00000374695.8/3339, intron 1 of 96)	HSPG2
cluster_1	chr1_21963577_21964368	13.366186277841	3.91407651866014	4.42489579133671	4.40729721288162	0.876071079336387	Distal Intergenic	CELA3B
cluster_1	chr1_219660566_219662103	13.239498209794	6.31716214581889	4.74329287937149	4.35063661627075	0.952258231815272	Distal Intergenic	ZC3H11B
cluster_1	chr1_219834202_219834863	23.52992695908	1.65583612256935	0.4551133273452	1.57973533109924	0.921217400179486	Intron (ENST00000484239.5/105372926, intron 4 of 8)	SLC30A10
cluster_1	chr1_219839438_219840266	15.3803402129937	1.47442788955525	1.21589139828261	2.99667345643309	0.846382825827633	Intron (ENST00000484239.5/105372926, intron 4 of 8)	SLC30A10
cluster_1	chr1_2199112_2199773	29.9265075029945	14.585170501087	6.33794034619383	12.3368754370121	0.780431715481413	Promoter (<=1kb)	FAAP20
cluster_1	chr1_220338542_220339594	21.6055160781917	1.06239778050217	0.840030929143166	2.04441353069326	0.889226028111209	Distal Intergenic	RAB3GAP2
cluster_1	chr1_220776670_220777161	11.4830707834444	4.86536303449401	7.84410690324671	5.65414389667669	0.630647728810534	Promoter (2-3kb)	MTARC2
cluster_1	chr1_220810117_220810801	13.2528392496482	5.67036294179782	4.05490854214807	2.44431214662816	0.891502211819882	Promoter (<=1kb)	MTARC1
cluster_1	chr1_220884317_220885015	20.0431748240248	12.0985359471182	11.9018200244724	5.69203038883013	0.67147440024344	3' UTR	HLX
cluster_1	chr1_220893879_220894682	13.1673760612493	7.50243990288763	5.10541266478734	4.8804215873186	0.871344955451208	Distal Intergenic	HLX
cluster_1	chr1_221715249_221716128	29.5686992984699	3.76648807135904	2.82955456332054	3.36910555552365	0.928240594584374	Intron (ENST00000366899.4/11221, intron 2 of 3)	DUSP10
cluster_1	chr1_222736378_222736923	20.5103956039675	3.0083743439977	4.10835127318745	2.29672272435951	0.901376090859812	Promoter (<=1kb)	FAM177B
cluster_1	chr1_223029797_223031355	17.0078405731233	2.49792089626602	0.880724579161418	1.64894489214557	0.94663832438019	Distal Intergenic	LOC102724046
cluster_1	chr1_223133469_223134402	25.8125690366814	8.41215166608663	10.7151697016708	13.2770851334357	0.720978735495379	Promoter (<=1kb)	TLR5
cluster_1	chr1_22320437_22321097	10.7928180407711	3.66593520757364	3.00389365625147	1.06503358078437	0.884308012420609	Distal Intergenic	MIR4418
cluster_1	chr1_224164473_224165350	16.3603733896864	1.23483692830299	1.34442901044983	1.1645029232948	0.915693114875876	Distal Intergenic	DEGS1
cluster_1	chr1_224175416_224176084	14.6763516909403	7.06146540469313	6.13157982835199	4.91815002632836	0.941913069087392	Promoter (<=1kb)	DEGS1
cluster_1	chr1_224203279_224204099	14.4946770931517	4.9296777160528	2.59496495505453	4.47460534991728	0.881656145801521	Distal Intergenic	LOC101927143
cluster_1	chr1_224213237_224214256	11.2758760687827	2.31040672018781	1.85050109619236	4.79058452987124	0.716407555816602	Promoter (<=1kb)	LOC101927143
cluster_1	chr1_224340414_224341387	17.6136862632627	5.63668684132332	2.50644502371953	1.98570645489882	0.940490539813961	Distal Intergenic	NVL
cluster_1	chr1_224498053_224499048	17.9985370524829	6.61803907227633	6.37919476381819	12.5458606280726	0.560338753870325	Intron (ENST00000471578.5/149111, intron 1 of 5)	CNIH3
cluster_1	chr1_2247895_2248887	35.1621944980588	24.2392263079513	18.0151612565012	7.13646257617303	0.615289876326629	Promoter (<=1kb)	SKI
cluster_1	chr1_224851458_224852383	9.81553512189753	3.14765189528033	2.19151927498355	3.68031722528803	0.839292144012893	Intron (ENST00000657178.1/105373108, intron 1 of 3)	LOC105373108
cluster_1	chr1_224880463_224881129	15.265848546606	6.45158645348283	4.32855457981508	3.2314943287228	0.922347112189014	Promoter (<=1kb)	LOC105373108
cluster_1	chr1_224922301_224922913	9.73391556848226	4.08442834688104	3.75634735614421	4.25708830783777	0.898399313016893	Intron (ENST00000445597.6/127602, intron 1 of 60)	DNAH14
cluster_1	chr1_22556230_22557097	21.3717695440989	11.6592911679034	8.81707505871796	4.89247324293964	0.788523134224684	Distal Intergenic	EPHA8
cluster_1	chr1_225677170_225678125	15.2368654869225	5.76675124900955	4.45370680599556	3.67019841327005	0.975176795781555	Distal Intergenic	LOC102723834
cluster_1	chr1_225845553_225846276	25.266289344922	6.30857679581644	5.7236327400143	4.89046563346986	0.952011299723099	Promoter (<=1kb)	TMEM63A
cluster_1	chr1_225898858_225899962	21.3992685060954	3.77696577066304	2.37408992350705	1.17744225882717	0.977211043880928	Intron (ENST00000432920.2/10637, intron 5 of 7)	LEFTY1
cluster_1	chr1_225911095_225911832	12.5752216926368	3.2910289709273	3.36180748817548	2.34502656080525	0.93625448418402	Promoter (<=1kb)	LEFTY1
cluster_1	chr1_22593018_22593827	15.2139931718029	2.28257658409929	1.11522070874473	2.42533207607792	0.906089217909904	Exon (ENST00000166244.8/2046, exon 6 of 17)	EPHA8
cluster_1	chr1_225939169_225940071	18.1129079710683	7.44260250601447	2.57326181546743	2.93648555771263	0.867876673371989	Promoter (<=1kb)	LEFTY2
cluster_1	chr1_226002690_226003194	21.0873729026023	10.7323426714191	5.81666473521157	5.70096128532521	0.855929827304373	Distal Intergenic	SDE2
cluster_1	chr1_226111557_226112360	19.5806898057617	5.66867333186341	6.24865491169766	5.72397795407481	0.901060721908879	Distal Intergenic	LINC01703
cluster_1	chr1_226196825_226197418	13.6224618674013	7.83561225357998	4.72711919183728	5.25209040767609	0.840841811163579	Distal Intergenic	ACBD3
cluster_1	chr1_226223147_226224338	16.826853081765	12.0502748886204	7.77902446656236	2.80915729110974	0.597841936073424	Promoter (<=1kb)	MIXL1
cluster_1	chr1_226404800_226405718	31.6051792453362	2.53703687636357	0.993643905843612	2.36177286055772	0.922900989471402	Promoter (2-3kb)	PARP1
cluster_1	chr1_22662308_22662895	21.6156399076966	8.06545889767636	6.61309603231399	2.56169686896832	0.868382003732994	Promoter (2-3kb)	C1QB
cluster_1	chr1_227356405_227357107	17.4916270764475	1.92372558460759	1.09277209718869	2.79022136449846	0.881393960388309	Distal Intergenic	LINC01641
cluster_1	chr1_227793644_227794338	16.4767421812598	10.1654939137368	5.79510840436495	5.76696337311037	0.785710770202924	Distal Intergenic	LOC105373289
cluster_1	chr1_22780655_22781362	25.4816856532413	9.93435961341144	4.56720005095063	3.66359211292206	0.899831506443569	Intron (ENST00000544305.5/2048, intron 1 of 6)	EPHB2
cluster_1	chr1_2278872_2279943	34.4719923056262	16.8087551650851	11.8146578429758	15.3393184900684	0.881309219809225	Intron (ENST00000378536.5/6497, intron 1 of 6)	SKI
cluster_1	chr1_228004297_228005085	15.2507895956797	7.45531568357327	6.2224062406992	3.9251266608463	0.863048006912122	Promoter (1-2kb)	WNT3A
cluster_1	chr1_229093547_229094327	28.1024268717002	2.62538193108591	0.822605104317528	2.16915528351355	0.928878380659572	Promoter (<=1kb)	LINC02814
cluster_1	chr1_22953051_22954273	9.04140032088753	2.78711848921312	0.982797100399053	2.03169772085346	0.897166613006587	Exon (ENST00000426928.7/646262, exon 8 of 8)	LACTBL1
cluster_1	chr1_229661080_229661721	14.2192733587771	9.10955043761663	5.86377831216706	7.16934734363169	0.800041837937635	Distal Intergenic	URB2
cluster_1	chr1_230277124_230277908	24.7333219775559	13.0673405038915	10.3637129900534	1.80504903369257	0.684582859880982	Intron (ENST00000366672.5/2590, intron 15 of 15)	GALNT2
cluster_1	chr1_230753395_230754314	16.394124722335	7.83651050865645	6.09463762892015	3.31326550005735	0.839447574815805	Intron (ENST00000366666.6/10753, intron 1 of 17)	CAPN9
cluster_1	chr1_231806385_231807277	13.4858361073334	5.48356187942878	3.39285179651515	3.80943811816821	0.943320360804374	Intron (ENST00000646525.1/100303453, intron 11 of 11)	DISC1
cluster_1	chr1_23263019_23264127	21.1945304468392	6.27481693866434	2.11753379520594	2.26077753603874	0.939864213249012	Distal Intergenic	LINC01355
cluster_1	chr1_233289518_233290225	20.0392501890811	2.66647786071161	3.84331417451618	4.10808087126097	0.856388597586569	Intron (ENST00000258229.14/80003, intron 1 of 33)	PCNX2
cluster_1	chr1_233294852_233295955	16.3927940044378	6.59214921027085	6.75438663471508	12.2399424816058	0.531666670033191	Promoter (<=1kb)	PCNX2
cluster_1	chr1_233326869_233328902	26.1535737501172	11.3215648090811	11.4423579629987	10.497757173618	0.932293128465043	Promoter (<=1kb)	MAP3K21
cluster_1	chr1_23357417_23358070	20.1615986841959	2.75789251327628	1.11605488458368	1.61729368454109	0.954134070454291	Distal Intergenic	ZNF436
cluster_1	chr1_233730630_233731522	16.8454725341641	1.75167548438248	0.741467929694688	1.49424826593371	0.928743668295648	Exon (ENST00000651271.1/ENST00000651271.1, exon 3 of 3)	KCNK1
cluster_1	chr1_23394719_23395654	15.1692635010968	3.13447518044012	2.33212001888129	1.46122671483063	0.972678665811112	Intron (ENST00000450454.7/6920, intron 7 of 10)	TCEA3
cluster_1	chr1_234214012_234215587	14.1027086326712	8.85400112557611	5.64182892634767	6.28762086035649	0.816892557977148	Promoter (<=1kb)	SLC35F3
cluster_1	chr1_234309627_234310676	6.5088763468813	2.4962051309155	4.21006602890387	4.16899406753989	0.564382614809531	Intron (ENST00000366618.8/148641, intron 4 of 7)	MIR4671
cluster_1	chr1_23436421_23437385	35.3391097089399	5.6304724530342	5.00067761010934	4.34828570681466	0.938983730772668	Promoter (<=1kb)	ASAP3
cluster_1	chr1_235093196_235094244	17.4315921289509	9.33914198385704	7.80412945721443	9.733368557047	0.843749115445175	Distal Intergenic	NA
cluster_1	chr1_235199382_235200274	10.5677777681117	4.63132965383086	3.67048782956599	3.26020425847718	0.973951637232174	Intron (ENST00000366603.6/51742, intron 17 of 23)	ARID4B
cluster_1	chr1_235357414_235358215	9.68392468357559	6.72741072825645	4.45146143686993	1.97629852209133	0.630779769411084	Intron (ENST00000643418.1/6905, intron 1 of 7)	TBCE
cluster_1	chr1_23539573_23540371	24.7660198148018	10.3724770711667	7.74430648600939	8.34950761962453	0.963154446928688	Distal Intergenic	E2F2
cluster_1	chr1_23598159_23599064	38.8447560104013	10.6123132306692	10.0635358363508	3.62363133484092	0.907012574795327	Intron (ENST00000477916.5/259283, intron 2 of 6)	LOC107984928
cluster_1	chr1_23619420_23620177	17.1087300172001	7.4185621721886	4.77292741118657	6.50940393405873	0.892306982110621	Intron (ENST00000477916.5/259283, intron 2 of 6)	MDS2
cluster_1	chr1_236287821_236288550	16.039465232881	5.72927727205657	4.34471046592577	1.05115906156912	0.854243984832029	Distal Intergenic	ERO1B
cluster_1	chr1_236502993_236503742	21.8715941999295	7.70841021233459	6.85450951488502	8.69090385550779	0.870350760150132	Downstream (<=300bp)	LGALS8
cluster_1	chr1_237031713_237032552	13.8068628663199	3.9981163897099	2.71902152126367	2.10980305010765	0.98316480056153	Distal Intergenic	RYR2
cluster_1	chr1_23916652_23917294	17.973261450771	9.8640385598472	3.63399135308071	2.25450240462221	0.744052117956703	Distal Intergenic	CNR2
cluster_1	chr1_239809991_239810491	13.524059545458	7.32874287317733	3.85216641501502	1.3458417887744	0.737854919647446	Intron (ENST00000468573.5/1131, intron 6 of 8)	CHRM3
cluster_1	chr1_239997310_239998310	12.0228131853674	4.33585421315981	3.30706962537941	3.17898382204718	0.983770472379914	Distal Intergenic	FMN2
cluster_1	chr1_240492680_240493544	22.6634633699271	4.37231567981734	3.25145876339101	4.07698558977114	0.928641475430101	5' UTR	FMN2
cluster_1	chr1_24112114_24112919	14.8875886440598	6.25260819352631	6.75274992599785	8.7288318414958	0.719917675455431	Promoter (<=1kb)	MYOM3
cluster_1	chr1_2413702_2414770	16.0480254791801	11.218925276984	11.2404819910873	5.34556306341663	0.570975138892369	Promoter (<=1kb)	PEX10
cluster_1	chr1_24150270_24151866	28.6968679063048	10.0365712584659	8.1075413270628	4.96856524732951	0.939745211103185	Distal Intergenic	IL22RA1
cluster_1	chr1_24186924_24188042	19.316130530894	9.48091068072571	9.53213511100776	8.09943829259997	0.932259477194247	Promoter (<=1kb)	IFNLR1
cluster_1	chr1_242178769_242179871	9.76889314428119	2.9106020755398	4.19199222217364	1.2831551948148	0.769358558044057	Intron (ENST00000656612.1/ENST00000656612.1, intron 3 of 3)	PLD5
cluster_1	chr1_24286453_24287273	20.0403736011201	5.25307143485698	3.09673908515501	1.97838408620039	0.976172129777202	Intron (ENST00000690803.1/57822, intron 2 of 15)	GRHL3
cluster_1	chr1_24308219_24309030	18.172553117333	3.94859635598943	2.137146936924	1.74812829689779	0.985362568029639	Exon (ENST00000437965.1/105376871, exon 4 of 5)	GRHL3
cluster_1	chr1_24319121_24319762	16.3217215091702	9.8103757464666	3.99505409262507	6.12991101418622	0.738854729813225	Promoter (<=1kb)	GRHL3
cluster_1	chr1_24392198_24392774	12.6408966411537	7.27762062632359	5.09387529063422	4.94653182730047	0.880025638942102	Promoter (<=1kb)	STPG1
cluster_1	chr1_244299417_244299995	9.16463260977141	5.10260818363707	2.76258668664635	6.75001474931306	0.538433863445657	Distal Intergenic	LOC105373262
cluster_1	chr1_244341281_244342163	9.35291565684222	3.43620947224158	2.56834015697669	3.7269622810811	0.860692082987719	Distal Intergenic	C1orf100
cluster_1	chr1_24463601_24464333	17.3318301057801	5.99026332942139	3.12696880996376	2.59488518248355	0.943679974643161	3' UTR	NIPAL3
cluster_1	chr1_244815170_244816253	13.5106377200532	1.30508092276148	0.90375752682679	1.87191149640361	0.889882758298106	Distal Intergenic	COX20
cluster_1	chr1_246647024_246647732	11.5196110257426	4.06470331234666	2.55434010998578	2.36302955438511	0.968859988957313	Exon (ENST00000483271.1/163882, exon 8 of 8)	LOC102724382
cluster_1	chr1_246753788_246754398	14.1377738642143	3.6935901691995	3.90530750961085	3.71287180687526	0.909226248144439	Intron (ENST00000366510.4/51097, intron 5 of 11)	LINC01341
cluster_1	chr1_246788809_246789846	11.5324108904881	5.78041010076142	4.36116522414872	4.63175895174768	0.948788382087056	Promoter (<=1kb)	LINC01341
cluster_1	chr1_247118767_247119375	27.5504402534195	3.95284780938409	3.30068261212329	3.22767174417443	0.93502793916012	Distal Intergenic	LINC02897
cluster_1	chr1_24724507_24725894	25.1817692707377	12.707317637058	5.69763457689722	8.46651068002948	0.823024178875823	Distal Intergenic	CLIC4
cluster_1	chr1_247376516_247377248	15.3065648245325	5.35218953153952	6.45054960333548	3.13703724218924	0.829077875496961	Exon (ENST00000697393.1/107985115, exon 6 of 6)	LOC107985375
cluster_1	chr1_247390042_247390606	21.0700131850961	6.8011052972225	5.78638176933682	5.71524399316164	0.960478163353558	Promoter (<=1kb)	LOC107985375
cluster_1	chr1_247447995_247448787	16.9337960215636	6.43817967944496	5.0733901636209	3.38549955953864	0.939718538483925	3' UTR	NLRP3
cluster_1	chr1_24909467_24909994	21.6613019297412	4.15442813356848	2.43691350245624	2.15721066465695	0.976180477588841	Intron (ENST00000308873.11/864, intron 3 of 4)	MIR6731
cluster_1	chr1_24926576_24927070	15.9670652565768	8.02315272413753	4.25671174657142	2.45732437644324	0.805720794179937	Promoter (1-2kb)	RUNX3
cluster_1	chr1_24929975_24930703	17.6950074085951	10.1235399610727	4.96276297272659	11.5256965471175	0.600760775285287	Promoter (<=1kb)	RUNX3
cluster_1	chr1_24970108_24970780	12.4559587480515	5.28936155841673	2.42357757757325	2.70961605427686	0.890470302202191	Exon (ENST00000568143.1/ENST00000568143.1, exon 1 of 1)	RUNX3
cluster_1	chr1_25506540_25507360	16.7962167754168	6.41306873059364	3.38433648881329	3.46915934157412	0.934247853497478	Distal Intergenic	LDLRAP1
cluster_1	chr1_25517466_25518370	13.3585014254226	1.95172511470295	1.5757506327162	2.31435031534117	0.899631147558458	Distal Intergenic	LDLRAP1
cluster_1	chr1_25586103_25586591	17.9898894173985	7.05242675198876	2.77994863415193	3.49145254772398	0.894322660100829	Intron (ENST00000412797.1/26119, intron 1 of 1)	LDLRAP1
cluster_1	chr1_25587873_25588703	12.7882039691771	6.23660967881437	1.9356217268179	1.56256665629647	0.789227362855336	Intron (ENST00000412797.1/26119, intron 1 of 1)	LDLRAP1
cluster_1	chr1_25708050_25708650	8.04834468318815	4.96064273693575	1.65125922576148	2.53516752297848	0.71070008591163	Promoter (<=1kb)	MAN1C1
cluster_1	chr1_25780178_25781094	19.7732712298079	3.29169794156207	1.56174544172537	4.22654940961635	0.86911269904722	Promoter (<=1kb)	MAN1C1
cluster_1	chr1_26009772_26010552	9.52030277895575	4.0220944276115	2.92003360019023	3.19766821414013	0.958113432991004	Distal Intergenic	EXTL1
cluster_1	chr1_26094257_26095344	11.5109393297874	5.53431213929148	2.76195190569817	4.64230880378885	0.815954541224894	Distal Intergenic	PDIK1L
cluster_1	chr1_26154711_26155495	16.2698290099969	13.0865139423465	8.69537826612246	2.66192846626921	0.521999462793701	Distal Intergenic	FAM110D
cluster_1	chr1_26176961_26177894	24.614968487906	3.71215621172234	1.55520443357999	1.39565390216653	0.974868035397523	Promoter (<=1kb)	CNKSR1
cluster_1	chr1_26190085_26191010	20.9486791383185	6.7959855858878	2.43366908920509	1.38484979311065	0.911663630053097	Promoter (<=1kb)	CATSPER4
cluster_1	chr1_26200673_26201698	20.1249353161115	6.62185421251713	2.73982671894294	1.35097838809598	0.911470783781808	3' UTR	ZPLD2P
cluster_1	chr1_26224980_26225966	22.5492742942776	12.9599815038214	10.9879915280485	6.19041924976527	0.763870371032544	Promoter (<=1kb)	ZPLD2P
cluster_1	chr1_26281907_26282646	24.5083305281333	18.7616135281252	12.4478383213283	8.2149160847567	0.622933272935296	Promoter (1-2kb)	SH3BGRL3
cluster_1	chr1_26335958_26337157	31.8087315531588	15.8479483028608	13.2540109835421	8.89178605595871	0.87319267516362	Promoter (<=1kb)	CRYBG2
cluster_1	chr1_26359869_26360708	19.179476861451	12.022013861186	5.66758609827419	3.33500212028997	0.698401184975233	Promoter (<=1kb)	CRYBG2
cluster_1	chr1_26411741_26412414	19.7378998848982	15.5663855177896	8.86227218576614	2.42702046122083	0.541432026730463	Promoter (<=1kb)	LIN28A
cluster_1	chr1_26412528_26412811	33.2869144613127	16.176015814932	6.46509646184028	3.18441849198768	0.788684105632094	Promoter (1-2kb)	LIN28A
cluster_1	chr1_26416979_26417811	18.5199006772086	13.3109135505077	8.72005481555116	4.54464889085319	0.628988528441677	Intron (ENST00000254231.4/79727, intron 2 of 4)	LIN28A
cluster_1	chr1_26418417_26419494	39.0865691974119	19.8815780287496	7.76631012208346	1.71069577041423	0.745519910170084	Intron (ENST00000254231.4/79727, intron 2 of 4)	LIN28A
cluster_1	chr1_26530936_26531839	29.3621232210561	12.3648713663431	9.42489171523585	16.2513725957271	0.722112420564958	Promoter (<=1kb)	RPS6KA1
cluster_1	chr1_26541624_26542353	13.8929853000851	5.94195642761714	3.43270186009563	3.76397880504753	0.924577793092603	Promoter (<=1kb)	RPS6KA1
cluster_1	chr1_26743972_26744524	11.6942621722534	2.17929486506296	2.35291857045959	3.23295668310913	0.846416729681334	Intron (ENST00000430799.7/8289, intron 4 of 19)	ARID1A
cluster_1	chr1_26862744_26863268	31.4989633830165	4.62377402710561	2.13403691821156	2.71477574254447	0.957334966661208	Promoter (<=1kb)	SFN
cluster_1	chr1_26959684_26960954	26.8213055486092	6.99730698325844	3.56883288282806	4.34948899924748	0.964693349006301	Promoter (<=1kb)	KDF1
cluster_1	chr1_26997637_26998211	33.2256001446807	16.7542341258342	13.2352103588615	10.6226466759408	0.917238105577276	Intron (ENST00000522111.3/388610, intron 1 of 1)	TRNP1
cluster_1	chr1_26999387_26999903	48.5033885637624	11.3847996319329	6.7506532995939	6.42288773315277	0.980655678271414	3' UTR	TRNP1
cluster_1	chr1_27007114_27007748	27.0049131530026	2.55185657238092	1.10010733512316	1.25192842026062	0.949232105063936	Intron (ENST00000289166.6/115572, intron 1 of 1)	TENT5B
cluster_1	chr1_27008149_27008567	30.0121011653352	4.60178628891115	1.80119387829819	4.4493057367389	0.912706210741828	Intron (ENST00000289166.6/115572, intron 1 of 1)	TENT5B
cluster_1	chr1_27027017_27027531	19.8973375905548	10.7507368783102	3.71120202388679	8.44980535631083	0.722510003127177	Distal Intergenic	TENT5B
cluster_1	chr1_27044524_27045212	18.7164908606981	8.06816579247105	5.43234630142992	6.04405390381842	0.946208765011717	Distal Intergenic	TENT5B
cluster_1	chr1_27049548_27050122	19.7789986620483	2.58865943036992	0.587412260452421	1.74430566091389	0.93950236491024	Distal Intergenic	TENT5B
cluster_1	chr1_27057442_27058614	11.7478628620834	5.4147050790316	3.40722262244368	4.60846351184727	0.884244809219174	Distal Intergenic	SLC9A1
cluster_1	chr1_27306801_27308106	23.3493949649692	9.80681689436246	6.72985370257474	2.95565631070176	0.855920984307165	Promoter (1-2kb)	WDTC1
cluster_1	chr1_27350569_27351854	42.495489263836	29.601605680212	17.4238562676382	6.42107498721594	0.618437207216391	Promoter (<=1kb)	SYTL1
cluster_1	chr1_27357420_27357933	23.4625546247406	10.7875698099531	6.91519673999744	6.08127168559671	0.915163133309766	Promoter (<=1kb)	MAP3K6
cluster_1	chr1_27382874_27383705	28.5399477651496	7.29308696326619	5.14855847177734	5.98369301672763	0.950818727114497	Promoter (<=1kb)	CD164L2
cluster_1	chr1_27614760_27616058	13.1967442971828	5.92101259084247	3.02192792461119	1.70089340765112	0.842759390709779	Exon (ENST00000374005.8/2268, exon 8 of 13)	FGR
cluster_1	chr1_27643593_27644433	11.8961821518974	3.56054755061921	1.55209451968404	0.838147120293743	0.937259432638084	Distal Intergenic	FGR
cluster_1	chr1_27656048_27656572	23.7375818264842	5.24248822059582	1.96160510392412	2.00762104240655	0.975856807439552	Distal Intergenic	LINC02574
cluster_1	chr1_27872177_27873384	18.1691154323818	12.3363493239429	8.31037770908162	5.77194457508984	0.709636649349751	Promoter (<=1kb)	THEMIS2
cluster_1	chr1_27934682_27935413	32.3996526995543	7.80587383924853	5.30619491846197	4.56318450106122	0.981256937359527	Promoter (<=1kb)	SMPDL3B
cluster_1	chr1_27937130_27937773	23.8715861900119	2.16003827509287	2.49061727341358	3.24041627428908	0.885769534020743	Promoter (2-3kb)	SMPDL3B
cluster_1	chr1_27959338_27960534	39.3618816222113	19.9381025102228	15.9760955023437	13.3153709003515	0.930736031785002	Promoter (<=1kb)	XKR8
cluster_1	chr1_28104797_28105678	20.2102021744944	7.12326110900992	5.32081335878189	3.45568202731941	0.947706579669719	Distal Intergenic	EYA3
cluster_1	chr1_28510656_28511893	23.4644597202643	3.22062630412039	2.18014321240877	3.35980946546528	0.91488078970135	Promoter (<=1kb)	RCC1
cluster_1	chr1_28784841_28785829	9.87944267520876	6.10784747964749	4.39071453253797	2.28781997092882	0.714433390127174	Distal Intergenic	OPRD1
cluster_1	chr1_28811959_28812858	13.9928900554056	4.61561701439415	2.81127373169393	5.93951919791448	0.777062541077555	Promoter (<=1kb)	OPRD1
cluster_1	chr1_28882027_28882509	27.0551440172068	10.7450531442183	10.203393869195	10.5691088940846	0.925492469270974	Distal Intergenic	EPB41
cluster_1	chr1_29121216_29121786	28.3454825399835	9.56958703631052	6.20302586278757	5.73506601550637	0.977189214753829	Promoter (<=1kb)	TMEM200B
cluster_1	chr1_29282727_29283883	61.1608998718953	42.6486659356743	31.4874279998638	8.01248233007856	0.576179932088459	Promoter (<=1kb)	PTPRU
cluster_1	chr1_29324607_29325506	63.5414554379703	12.2089666197418	6.79430356027097	3.46890562369512	0.98284495324317	Promoter (1-2kb)	PTPRU
cluster_1	chr1_29974002_29974853	10.5659325062081	6.49405920290073	6.33547817872769	1.82447417876937	0.593797463827425	Distal Intergenic	LINC01648
cluster_1	chr1_30685055_30686249	42.9612719140069	18.014513109088	11.7823913429511	7.72765097850453	0.902665363727202	Distal Intergenic	MATN1
cluster_1	chr1_30782317_30783296	17.1390548664311	7.31326537691817	5.25700613599164	5.15860164959	0.967312783743836	Distal Intergenic	LAPTM5
cluster_1	chr1_30854062_30854524	15.0755977911681	11.1842350526967	7.0762316254985	3.62214123417915	0.608491691319884	Distal Intergenic	LOC400748
cluster_1	chr1_30929323_30930254	14.9494840895574	6.28620613099919	3.09462528113197	3.3453164465649	0.902829486583869	Distal Intergenic	PUM1
cluster_1	chr1_31394495_31395341	21.7472978724557	12.4905930162882	8.44165919283755	9.73422682297382	0.871191199382378	Distal Intergenic	SERINC2
cluster_1	chr1_31575958_31576819	20.7525041621521	5.57075541585616	2.39025694831064	9.49870129332744	0.691640704041216	Promoter (<=1kb)	TINAGL1
cluster_1	chr1_31745544_31746090	11.7307935575271	6.31124554468702	3.20234809599586	5.4449105828752	0.769526907166025	Promoter (1-2kb)	ADGRB2
cluster_1	chr1_31815636_31816367	20.7635614629757	6.1799616596499	3.13857500822434	3.66801867670679	0.961353627154243	Promoter (<=1kb)	SPOCD1
cluster_1	chr1_31977460_31978239	11.9135236488235	7.31951565852882	2.25767753516681	7.24643327468194	0.57624717283746	Intron (ENST00000641788.1/ENST00000641788.1, intron 1 of 1)	PTP4A2
cluster_1	chr1_32248136_32248949	34.7263921361124	9.1185715433512	4.88266495028485	7.28883486677605	0.935271173347327	Promoter (<=1kb)	FAM167B
cluster_1	chr1_32273625_32274506	23.7497549049919	3.78341316841926	2.55685404416164	5.30460955837601	0.865127946415937	Promoter (<=1kb)	LCK
cluster_1	chr1_32361303_32362787	16.4344405044983	9.94492261464798	7.45246478013886	6.67618040543224	0.867205347023004	Promoter (<=1kb)	FAM229A
cluster_1	chr1_32437788_32438882	20.4976119036933	1.76231194709063	0.506261339392624	1.39142772533468	0.930426877094259	Distal Intergenic	ZBTB8A
cluster_1	chr1_32447581_32448792	14.663928250523	5.53854579302384	5.19455265747843	7.56680467806921	0.759038130513013	Distal Intergenic	ZBTB8A
cluster_1	chr1_32712138_32712619	21.5527438724323	8.23195476527721	7.02689230597227	2.41587286357057	0.845341477464282	Distal Intergenic	SYNC
cluster_1	chr1_32716346_32717417	30.6412712796751	9.88526985434585	8.15360187478808	6.67851471921921	0.977959865661208	Distal Intergenic	SYNC
cluster_1	chr1_32760787_32761288	20.2818635047998	3.2960614760246	1.96495292876823	2.6670222678226	0.93973188488961	Intron (ENST00000401073.7/57648, intron 1 of 6)	KIAA1522
cluster_1	chr1_32765266_32766266	17.1844786038226	10.6860887848061	7.19864160258097	5.51822588198741	0.780332707125066	Promoter (<=1kb)	KIAA1522
cluster_1	chr1_32772868_32773483	18.5048653737928	6.4045806262112	7.98775507831022	6.8349703737765	0.848351775574381	3' UTR	KIAA1522
cluster_1	chr1_32892754_32894381	19.9600285747509	12.5692722572378	9.47559536741429	4.9517640870617	0.704171326545177	Promoter (<=1kb)	HPCA
cluster_1	chr1_33055103_33056039	7.55480900510689	5.02486238274646	2.87330190096912	3.4252341473916	0.753895149451509	Intron (ENST00000548559.1/204, intron 2 of 4)	AK2
cluster_1	chr1_33152721_33153521	26.9325860130995	5.05553615371307	4.90977204571659	1.8916936840712	0.938981898652487	Intron (ENST00000291416.10/55223, intron 4 of 4)	TRIM62
cluster_1	chr1_33633080_33633842	11.1268873871568	3.67203088572642	4.30533226665646	4.35231615328223	0.847157788911407	Exon (ENST00000373381.9/114784, exon 32 of 71)	CSMD2
cluster_1	chr1_34162929_34163702	27.854447513088	17.2211657771328	14.2830796756538	8.24423090875036	0.73222049729566	Promoter (1-2kb)	CSMD2
cluster_1	chr1_34166188_34166602	18.6530795939196	9.65386665504556	7.99138265742736	1.57622828654415	0.692401812230427	Promoter (<=1kb)	C1orf94
cluster_1	chr1_34166706_34167398	17.7097048593513	5.10589452401036	4.7471551574977	2.24367272343162	0.922426557651349	Promoter (<=1kb)	C1orf94
cluster_1	chr1_34188141_34189054	15.1712508502525	2.12436510308644	1.24292480245531	1.22732111770676	0.957022106321963	Intron (ENST00000373374.7/84970, intron 1 of 6)	C1orf94
cluster_1	chr1_34742616_34743073	17.2178133826739	8.48157880681226	5.9429751170161	4.79538426179314	0.899891655627448	Intron (ENST00000426886.1/113444, intron 2 of 4)	GJB5
cluster_1	chr1_34781101_34782439	13.6436826842037	5.16843234708471	3.7583069497338	2.83981001757484	0.956733178408987	Promoter (<=1kb)	GJB3
cluster_1	chr1_34884896_34886359	20.0128089449175	6.96019043231368	5.94921211712644	3.07914422177486	0.913832411937598	Exon (ENST00000235180.4/58512, exon 4 of 10)	DLGAP3
cluster_1	chr1_34918626_34919579	16.7807972706315	9.20170508703236	4.59893560512335	1.29868927641775	0.722632165523582	Intron (ENST00000373347.6/58512, intron 1 of 11)	DLGAP3
cluster_1	chr1_35210133_35211198	11.940644360927	8.26236482635971	6.9335486615062	1.85730132639403	0.560615810619184	Distal Intergenic	SFPQ
cluster_1	chr1_35390204_35391503	15.4690476258989	1.57244079783902	0.825999374836557	1.4953129742231	0.922574113611004	Promoter (1-2kb)	ZMYM4
cluster_1	chr1_35554898_35555457	24.4649993760922	2.76590766171251	2.73015413426905	2.88023337407247	0.91293030289328	Promoter (<=1kb)	KIAA0319L
cluster_1	chr1_35577447_35577988	17.7727669185391	10.4641520694175	4.48473236197338	1.71232765030996	0.700503405759438	Promoter (<=1kb)	TFAP2E-AS1
cluster_1	chr1_36096993_36097645	14.838557991646	3.94891665743288	2.65218039543097	3.72823376451396	0.919788369929154	Promoter (2-3kb)	COL8A2
cluster_1	chr1_36160792_36161680	23.4920620542805	11.1940101347547	9.73134699179669	11.863865573101	0.866473951528065	Intron (ENST00000429533.6/55700, intron 1 of 5)	MAP7D1
cluster_1	chr1_36176164_36176768	25.9146487181155	4.20388317067201	3.70115891903401	2.44789939566419	0.950535198694601	Promoter (<=1kb)	MAP7D1
cluster_1	chr1_36178586_36179405	29.939869936007	8.17684218462303	7.49937576117784	4.21459427203868	0.943137250047964	Promoter (<=1kb)	MAP7D1
cluster_1	chr1_36187665_36188642	26.0859491868492	14.042446325569	8.03057909590735	18.2998836233127	0.572176446802747	Distal Intergenic	MAP7D1
cluster_1	chr1_36299697_36300354	11.303077765538	2.42134365518171	2.95642402014365	4.31967382176748	0.772534229546768	Intron (ENST00000469141.6/9967, intron 10 of 12)	SH3D21
cluster_1	chr1_3631473_3632229	7.1699860015464	3.23044566214491	3.52873173297941	0.936689059937813	0.70526797410844	Exon (ENST00000378322.7/49856, exon 10 of 11)	WRAP73
cluster_1	chr1_36369023_36369442	20.5309198931103	9.83251481907675	6.88227155559114	8.00175371885171	0.925223152526881	Promoter (2-3kb)	STK40
cluster_1	chr1_36576032_36576534	16.7339111598905	6.2432656432974	6.11991176968765	3.98375794128626	0.917169192646353	Distal Intergenic	CSF3R
cluster_1	chr1_3674192_3675449	12.1206575454696	3.31848631897721	2.48491232511334	3.51777523225978	0.896803133468249	Intron (ENST00000378295.9/7161, intron 1 of 13)	TP73-AS3
cluster_1	chr1_36771120_36772231	20.3399257926113	6.2977035117898	3.24096913960718	3.52441676491113	0.962400790162928	Intron (ENST00000664693.1/ENST00000664693.1, intron 1 of 2)	GRIK3
cluster_1	chr1_3695495_3696157	14.2328361796386	4.97331812537579	3.87657992959951	5.55325327609019	0.860581852781915	Promoter (1-2kb)	TP73
cluster_1	chr1_37036033_37036742	19.6750686059065	7.83871535585337	5.05339769015857	3.0485497679153	0.904743220624146	Promoter (1-2kb)	GRIK3
cluster_1	chr1_3707273_3708191	14.2215625471808	5.4365090576118	3.26076087823328	2.32827709812394	0.926909992770305	5' UTR	TP73
cluster_1	chr1_3708759_3709365	11.2146623927522	4.07482737636246	2.79380405410887	2.23065948569425	0.964561391745113	Intron (ENST00000378295.9/7161, intron 4 of 13)	TP73
cluster_1	chr1_3732516_3733544	14.4854477719609	3.46143635687478	2.59088680987935	2.28599451638312	0.972395863354871	3' UTR	TP73
cluster_1	chr1_37394855_37395712	24.5436318456704	5.75059809718392	5.51193831908106	5.70263380905854	0.918800751208987	Intron (ENST00000668045.1/107984942, intron 1 of 1)	LOC107984942
cluster_1	chr1_37764316_37766359	11.8134897854964	7.56967432361994	6.42849244587576	2.1525817461358	0.61903393326867	Promoter (<=1kb)	EPHA10
cluster_1	chr1_3793212_3794235	23.615896856033	1.9433039084646	1.18430079756328	1.42895510213796	0.932568778128994	Promoter (2-3kb)	LRRC47
cluster_1	chr1_38028303_38029775	12.1246347374821	5.43085991261086	4.04245439632318	3.69521464323567	0.962036645012693	Distal Intergenic	UTP11
cluster_1	chr1_38139650_38140651	10.8738990416748	8.22909468099611	4.06769925957846	3.06772518851038	0.621042038890185	Promoter (<=1kb)	LINC02786
cluster_1	chr1_38270299_38271074	27.7845854233505	4.33839757269659	1.22361598045989	0.988767685011465	0.982012722005262	Distal Intergenic	LINC01343
cluster_1	chr1_38291832_38292640	10.8702939088454	3.66985805626852	1.56810363323428	1.86977145961606	0.933816014814455	Distal Intergenic	LINC01343
cluster_1	chr1_38489685_38490421	27.3458947450318	1.9030623347682	2.60657577619317	2.07631221819363	0.904856844246065	Intron (ENST00000665359.1/105378656, intron 1 of 1)	LINC01685
cluster_1	chr1_38558009_38559603	13.554292420875	8.87847104051245	5.1341841681524	2.25845426217127	0.663359807550212	Distal Intergenic	LINC01685
cluster_1	chr1_38803770_38804926	14.3666887652648	9.81436102617779	6.74971903274107	4.130592796095	0.68398033987121	Exon (ENST00000641963.1/ENST00000641963.1, exon 1 of 3)	RRAGC
cluster_1	chr1_38953101_38953953	19.1520261586812	2.31022649092674	0.483303933330604	2.91830144913717	0.883235311424328	Intron (ENST00000667635.1/ENST00000667635.1, intron 1 of 1)	RHBDL2
cluster_1	chr1_39001360_39002012	20.6656419417284	1.25666276470665	1.54583872779299	0.916722677157332	0.918625220575523	Intron (ENST00000432648.8/79647, intron 3 of 4)	AKIRIN1
cluster_1	chr1_39016588_39017327	18.3643189613333	3.84745235536329	2.85113119089644	1.6110743270201	0.971837857701952	Distal Intergenic	NDUFS5
cluster_1	chr1_39230131_39231017	10.5879644858821	3.52851922928965	2.35511667274086	3.36051789187608	0.904275616234371	Intron (ENST00000361689.7/23499, intron 2 of 93)	MACF1
cluster_1	chr1_39609443_39610451	14.1627768423148	3.509340628614	1.86415744977735	2.1707602722741	0.9689895996845	Distal Intergenic	HEYL
cluster_1	chr1_39639224_39640249	24.4221192348076	12.6477121974121	6.13585747162083	4.77304584801551	0.80969530981715	Promoter (<=1kb)	HEYL
cluster_1	chr1_39799150_39800202	11.6481889619203	4.15790711549575	2.94140088355396	4.48640007327985	0.85844993802879	Promoter (<=1kb)	NA
cluster_1	chr1_39922108_39922847	21.4880674768893	8.62916569117203	6.33099542110598	2.25140780110718	0.847977979801185	Distal Intergenic	MYCL
cluster_1	chr1_40773523_40774493	18.3041181512467	3.45681911368944	2.77025467288951	3.63295024400442	0.911987997424692	Distal Intergenic	NFYC
cluster_1	chr1_40802156_40802879	31.8198910177425	18.595582313096	13.8884346407015	10.5871021346781	0.832495891431827	Intron (ENST00000347132.10/9132, intron 1 of 13)	KCNQ4
cluster_1	chr1_40818034_40819128	27.2720995910756	19.3598134602435	12.4190338214803	6.38405146506115	0.634646344902976	Promoter (<=1kb)	KCNQ4
cluster_1	chr1_40837785_40838710	14.3282750206086	0.929384581260177	2.75703452163115	2.19207834946497	0.826374186863006	3' UTR	KCNQ4
cluster_1	chr1_40948522_40949335	8.58233074273252	3.80599870955912	1.37557220504211	6.19455997743914	0.51277378375513	Distal Intergenic	CTPS1
cluster_1	chr1_40952394_40952948	11.3385692842557	5.15529290219454	2.79636248915467	6.09276096772161	0.701592921578884	Distal Intergenic	CTPS1
cluster_1	chr1_41021480_41022303	13.7120733484127	3.08798938729746	2.44544130521696	1.68120465379019	0.970363977627194	Promoter (<=1kb)	SLFNL1
cluster_1	chr1_41371732_41372717	24.5875760207102	20.4802194989709	10.8926294340864	4.07984362843001	0.528439512103204	Promoter (2-3kb)	FOXO6-AS1
cluster_1	chr1_41394539_41395775	22.6543210937717	15.1500705417072	9.96403792416957	3.20935483771687	0.625469293759334	Distal Intergenic	FOXO6-AS1
cluster_1	chr1_41823187_41824130	18.4566609090518	12.8286414426425	7.72234461143361	5.00424234620379	0.672502398034798	Intron (ENST00000372584.5/59269, intron 1 of 7)	HIVEP3
cluster_1	chr1_42146662_42147287	10.654792748298	4.93138560795473	3.09588668111641	2.8535434717266	0.914152146491767	Distal Intergenic	GUCA2B
cluster_1	chr1_42173228_42173787	14.7906779014888	5.95648027879324	5.73586559475937	4.49238083960469	0.944810879621431	Distal Intergenic	GUCA2A
cluster_1	chr1_42922972_42923438	27.6542227191916	11.9915858792791	4.99354118842222	6.25245007285387	0.872816075284589	Distal Intergenic	SLC2A1
cluster_1	chr1_42978380_42979350	7.72899837896566	3.64043707204811	2.05827394391281	3.53783823855526	0.796376833730799	Intron (ENST00000431759.6/440584, intron 3 of 3)	SLC2A1-DT
cluster_1	chr1_43067962_43068853	9.03248665763111	2.66450745815726	2.10689395819167	4.58009045834105	0.692417017091315	Distal Intergenic	FAM183A
cluster_1	chr1_43147433_43148273	51.6687601287566	24.1527813125704	27.2342056101449	28.6084307729687	0.800231673333011	Promoter (<=1kb)	FAM183A
cluster_1	chr1_43270288_43271449	31.0874968324225	6.16774705538537	2.510349968511	2.69120587146966	0.977277105891784	Promoter (<=1kb)	EBNA1BP2
cluster_1	chr1_43285171_43286121	19.2156577767348	4.58763100086369	0.857921759101891	1.78251927345331	0.94274123995606	Promoter (<=1kb)	C1orf210
cluster_1	chr1_43454379_43454965	22.6798064237138	7.27189465241097	6.77846984937123	10.2969619631616	0.779534339136669	Promoter (<=1kb)	HYI
cluster_1	chr1_43545667_43546467	33.2149979180605	24.7618350024905	20.2375460187986	9.55437516271127	0.577024943640376	Promoter (<=1kb)	PTPRF
cluster_1	chr1_43549881_43550601	39.714019069762	24.4864009283915	15.4682876705403	5.92673207473417	0.682407775542622	Intron (ENST00000496043.5/5792, intron 4 of 4)	PTPRF
cluster_1	chr1_43653215_43653712	22.0004663467839	4.24531703951683	2.32428260392075	0.170737613789099	0.962934520542124	Promoter (<=1kb)	KDM4A
cluster_1	chr1_43659545_43660874	16.2910178531116	1.04881839243185	0.747656229379402	0.33681210389697	0.93993587757865	3' UTR	KDM4A
cluster_1	chr1_43765921_43766810	13.2679211903453	6.33679147620434	5.46284555677627	1.44011582122198	0.739216291828796	Intron (ENST00000645057.1/9682, intron 16 of 25)	ST3GAL3
cluster_1	chr1_43885127_43885934	17.2653854758457	4.7552528002774	3.13257728058568	4.32399354870068	0.92581161516298	Intron (ENST00000645057.1/9682, intron 19 of 25)	ST3GAL3
cluster_1	chr1_43933213_43934041	24.1082645979302	11.033026994483	9.79886434501492	9.75466008132256	0.97002764807217	Promoter (<=1kb)	ARTN
cluster_1	chr1_43934129_43934530	30.7330736013011	8.88695510405617	6.1951738095799	5.81697233940911	0.982885894911655	Promoter (<=1kb)	ARTN
cluster_1	chr1_43934648_43935093	28.8272631550128	17.945650915891	10.792090159097	6.80742077929826	0.729376459422887	Promoter (<=1kb)	ARTN
cluster_1	chr1_43935673_43936995	20.500228460428	7.9485907401787	6.85189855428374	6.0101322817176	0.979382653648444	Promoter (<=1kb)	ARTN
cluster_1	chr1_44238036_44238759	27.5854558471358	10.9991341778563	10.3208088574579	5.67056645504103	0.881695988703146	Intron (ENST00000456170.6/79033, intron 6 of 6)	ERI3-IT1
cluster_1	chr1_44378075_44378916	8.81204281734642	3.87301491177346	1.98909250753402	3.31646966386651	0.842545205305557	Distal Intergenic	ERI3
cluster_1	chr1_44417111_44418502	21.6554747526526	18.023514142317	11.3310761442238	3.60109066891914	0.510964718451206	Intron (ENST00000355387.6/55182, intron 2 of 14)	NA
cluster_1	chr1_44483950_44484674	10.8675788934784	4.37330798135741	2.58163121258245	3.63698347259976	0.900665696211199	Intron (ENST00000355387.6/55182, intron 2 of 14)	MIR5584
cluster_1	chr1_44523679_44525104	16.9744701613845	8.13745093492722	7.63250541681392	4.36575217730349	0.835078043330369	Intron (ENST00000355387.6/55182, intron 2 of 14)	MIR5584
cluster_1	chr1_44542561_44544085	41.3140410280244	25.9076423822925	22.2609541305854	5.4354862081987	0.602762867156297	Promoter (1-2kb)	MIR5584
cluster_1	chr1_44592112_44593003	14.6629852472246	2.95329729445189	0.944262109701987	1.86065151787406	0.945246906380524	Intron (ENST00000355387.6/55182, intron 2 of 14)	RNF220
cluster_1	chr1_44594927_44595600	14.3780414323181	5.88647540750932	5.08898381242884	4.72636008376428	0.981048249421624	Intron (ENST00000355387.6/55182, intron 2 of 14)	RNF220
cluster_1	chr1_44609436_44610710	10.8882120936818	5.78716267920637	3.67681801181574	2.72271965294535	0.835981934187715	Intron (ENST00000355387.6/55182, intron 2 of 14)	RNF220
cluster_1	chr1_44720809_44722347	16.999822337948	11.368088998389	6.1323116986172	3.89925322813823	0.682274203197832	Promoter (<=1kb)	RNU5F-1
cluster_1	chr1_44784042_44784965	20.3363015085461	11.285317927617	7.46197081001044	5.74655271380746	0.832382891461379	3' UTR	BEST4
cluster_1	chr1_44793228_44794057	27.0301500621894	5.06743383592358	2.59878283815718	2.12049881977558	0.982026721993446	Distal Intergenic	BEST4
cluster_1	chr1_45018562_45019131	11.6136501764361	5.35416210922718	3.03571794745147	6.01744590873512	0.731222909412814	Exon (ENST00000359600.6/57643, exon 14 of 14)	UROD
cluster_1	chr1_45570025_45570594	15.0985949393943	9.37832960565585	5.58626711895286	4.78138178310114	0.773807956776091	Promoter (<=1kb)	AKR1A1
cluster_1	chr1_45573191_45573679	17.5787878049257	6.83852465609687	4.15731754224656	2.02438020511029	0.88663052461883	Distal Intergenic	AKR1A1
cluster_1	chr1_45926967_45927957	20.7929138386919	8.37256908262967	11.678127595958	3.57720378403856	0.672416976849135	Intron (ENST00000361297.7/23139, intron 4 of 28)	MAST2
cluster_1	chr1_45929174_45929704	14.0730322102214	7.89144201000344	4.45483392367651	4.74388986269543	0.832702816027694	Intron (ENST00000361297.7/23139, intron 4 of 28)	MAST2
cluster_1	chr1_46166579_46167637	8.77080564395824	1.97170953757458	1.81825979299597	1.52179249302889	0.946972580547653	Intron (ENST00000540385.2/110117499, intron 1 of 9)	TSPAN1
cluster_1	chr1_46347855_46348523	13.65923143535	4.71208889170022	4.27543314422507	6.51740042457532	0.772577641165737	Intron (ENST00000307089.7/387338, intron 2 of 4)	NSUN4
cluster_1	chr1_46406033_46407125	14.623867329116	7.45960315519375	6.27289582394753	6.76189706768514	0.950169770151622	Promoter (<=1kb)	FAAH
cluster_1	chr1_46442224_46443251	31.2068594790223	11.5985476066643	10.2362865961275	6.89573561427513	0.93992754820368	Promoter (<=1kb)	FAAHP1
cluster_1	chr1_46448021_46448840	14.8447866107397	6.65258386889049	4.88958888955501	2.9820412831816	0.880939964698606	Promoter (<=1kb)	LINC01398
cluster_1	chr1_46489221_46490125	21.642389372158	9.69688445937054	8.37102252892253	4.77900570484778	0.867040505479134	Promoter (<=1kb)	DMBX1
cluster_1	chr1_46516865_46517591	22.7020550866012	10.2702859746387	4.89015946622154	5.43929889283051	0.877625057685799	Distal Intergenic	DMBX1
cluster_1	chr1_46613461_46614241	18.8531902221889	11.0108081153089	4.26885287949512	5.22190285776096	0.751896650627114	Promoter (<=1kb)	MOB3C
cluster_1	chr1_46747615_46748317	11.8492412217266	3.77361847495944	2.98518126001884	3.47539060694395	0.936494545447791	Distal Intergenic	LOC105378699
cluster_1	chr1_46983152_46984660	7.28888522369964	2.39585636033432	1.47655979608083	1.68960286202984	0.962145439879688	Distal Intergenic	CYP4X1
cluster_1	chr1_47023181_47024265	11.9555251210106	6.55595568474517	3.88828630297781	3.27070621602515	0.829048539190901	Promoter (<=1kb)	CYP4X1
cluster_1	chr1_47192765_47193468	23.6355490181798	6.81156950046406	5.78037991804611	4.99378069333361	0.968816093858285	Promoter (1-2kb)	PDZK1IP1
cluster_1	chr1_47208171_47209488	14.9100503842153	5.15124766953233	3.00352240353087	2.96500799564694	0.963333907393395	Distal Intergenic	TAL1
cluster_1	chr1_47230720_47231880	13.6589502755076	4.77076767247671	4.41798910744005	3.16056315840289	0.948670877738581	Promoter (<=1kb)	TAL1
cluster_1	chr1_47449814_47450523	14.1592831650937	6.17413482168889	4.74455174774872	4.87780656497127	0.972267765247291	Distal Intergenic	FOXD2
cluster_1	chr1_47708959_47710851	15.1606198627435	12.0084335797285	9.3683461400591	5.60198271612314	0.581583072823099	Distal Intergenic	LINC01738
cluster_1	chr1_47776698_47777337	12.412688345027	3.89821000865629	1.04432203175057	1.82554071720451	0.91199951712792	Intron (ENST00000606738.3/388630, intron 5 of 6)	TRABD2B
cluster_1	chr1_48093647_48094389	10.5303645546042	3.10143909776696	3.67923389208449	4.73824129400512	0.766990005057832	Distal Intergenic	SKINT1L
cluster_1	chr1_50047783_50048993	12.7670905547698	4.17245239645105	4.15057637134001	1.25312733219821	0.850368793660213	Promoter (<=1kb)	ELAVL4
cluster_1	chr1_50332913_50334033	23.1167249775306	9.73686594056718	11.0094830311121	7.04745527512137	0.848291998217404	Distal Intergenic	LINC02808
cluster_1	chr1_50348502_50349568	6.09826987398992	3.89283063558756	2.21743107797979	2.70368923654636	0.774124514020501	Distal Intergenic	LINC02808
cluster_1	chr1_50416709_50417217	20.9373662118794	8.02545163304812	3.00991525156783	3.47066197746682	0.894915358068899	Distal Intergenic	DMRTA2
cluster_1	chr1_50430513_50431212	11.5396366594827	6.98180560095737	3.50398479249246	5.47769266747976	0.743778986042056	Distal Intergenic	LOC105378714
cluster_1	chr1_50620596_50621387	11.3876000999093	2.51895157546636	2.47996960195094	1.07279133194429	0.932447516936156	Intron (ENST00000396153.7/11124, intron 8 of 18)	FAF1
cluster_1	chr1_5119148_5120233	6.0792701250123	2.54180922298958	1.67838941222892	3.11060207832796	0.745063452482993	Distal Intergenic	LINC02782
cluster_1	chr1_51296315_51297353	15.8352222269944	10.4406392594182	7.48248507847056	6.71379492023417	0.805368452869339	Promoter (<=1kb)	TTC39A
cluster_1	chr1_51344498_51345687	14.8682663239649	4.175678059236	3.85010335693887	4.28585284793797	0.913156043282578	Promoter (<=1kb)	TTC39A
cluster_1	chr1_51423077_51423872	8.9090820425899	3.19268902330887	2.99949301472064	2.34727601250597	0.954794981169903	Promoter (<=1kb)	EPS15
cluster_1	chr1_52904662_52905476	13.9329337366718	3.53127521894863	2.35818637947225	2.29021365741292	0.977278739755449	Promoter (<=1kb)	ECHDC2
cluster_1	chr1_52920785_52921971	13.1484128903804	5.98822495367313	3.54225500131725	4.23258572885949	0.909073375525808	Promoter (<=1kb)	ECHDC2
cluster_1	chr1_53119906_53121005	15.9494408934507	6.20707627261793	5.92600256727751	3.99016127972775	0.922449965194274	Intron (ENST00000611397.5/6512, intron 2 of 9)	SLC1A7
cluster_1	chr1_53375468_53376581	5.995523517155	3.52762202771977	1.9882445577419	2.08882330779239	0.810219361640228	Distal Intergenic	LINC02812
cluster_1	chr1_53416931_53417709	6.27801691584462	3.10513704239954	1.25172263189281	0.696810752319814	0.787946406438877	Exon (ENST00000563752.5/163742, exon 2 of 3)	SLC25A3P1
cluster_1	chr1_53430234_53431300	19.3436935404329	1.67760075451241	2.23262677225162	3.19279693478241	0.861803784828134	Intron (ENST00000563752.5/163742, intron 1 of 2)	SLC25A3P1
cluster_1	chr1_53434651_53435852	6.36982910914518	1.21564426151284	0.942144522987457	1.30020259595694	0.908541260212293	Intron (ENST00000563752.5/163742, intron 1 of 2)	SLC25A3P1
cluster_1	chr1_53470013_53470926	28.5701641365421	12.8822607801876	10.8787874054597	4.83512094391048	0.822397564526934	Distal Intergenic	DMRTB1
cluster_1	chr1_53552003_53552855	8.32834885759981	1.96279925859982	1.99662723868522	4.78064433858717	0.609490100495522	Intron (ENST00000312233.4/148979, intron 3 of 9)	DMRTB1
cluster_1	chr1_53704992_53705973	15.2838513626319	2.2864249628911	2.00556796988688	1.79987960648154	0.936793998053043	Intron (ENST00000312233.4/148979, intron 1 of 9)	GLIS1
cluster_1	chr1_53860832_53861592	10.9132652502529	3.83376227328364	3.87702187030916	5.91086412768424	0.712001870929035	Intron (ENST00000464950.6/54432, intron 8 of 10)	NDC1
cluster_1	chr1_54375708_54376212	17.4741921436574	5.93541734253347	4.98774086426199	4.3900319146	0.978063161401816	Intron (ENST00000533946.6/23648, intron 2 of 5)	SSBP3
cluster_1	chr1_54490348_54490787	17.5046366244151	14.1697124679056	10.753627376086	4.51330436695663	0.522090670260049	Distal Intergenic	LOC105378735
cluster_1	chr1_54774830_54775580	14.1020490951858	3.87523733013161	1.9579747835731	2.8957526841684	0.939051008713113	Distal Intergenic	PARS2
cluster_1	chr1_54780962_54781858	14.8155528792491	3.53623809462879	1.7122474149796	2.02189891458654	0.96978951880185	3' UTR	TTC22
cluster_1	chr1_54800676_54801798	12.81505970525	1.95995338412788	2.45231151387386	1.37653978067425	0.912879295135022	Promoter (<=1kb)	TTC22
cluster_1	chr1_54813487_54814221	17.9439311259097	2.69102120447942	2.0569515236406	2.82859893004556	0.913964313417734	Exon (ENST00000358193.7/163747, exon 7 of 11)	LEXM
cluster_1	chr1_54950346_54951227	11.202504185338	6.16054410258721	4.75534668151078	5.27057718263728	0.925418490561384	Intron (ENST00000689429.1/ENST00000689429.1, intron 1 of 1)	LOC105378736
cluster_1	chr1_55021845_55022525	27.4346858388243	9.54440416547198	11.0801001982104	8.03277344625281	0.886111223405298	Distal Intergenic	PCSK9
cluster_1	chr1_56453129_56453965	18.7076715903542	4.9230613859432	2.00040906925934	2.57389581191547	0.959117779030103	Intron (ENST00000641494.1/8613, intron 3 of 5)	LINC01767
cluster_1	chr1_56516802_56517431	10.962667254448	2.3422014547222	1.74261030662211	7.49526377890209	0.516103456467496	Promoter (<=1kb)	PLPP3
cluster_1	chr1_56535099_56536044	23.5748299260445	2.15189770339143	0.953066332361098	1.57669611336248	0.935180563060633	Intron (ENST00000371250.4/8613, intron 2 of 5)	PLPP3
cluster_1	chr1_56549962_56551157	17.1915943452365	2.95041030591746	4.65428442206307	5.419687429989	0.791541463450707	Intron (ENST00000371250.4/8613, intron 1 of 5)	PLPP3
cluster_1	chr1_57307340_57307996	21.7678095010281	1.47073865880187	0.798405347820292	0.828119183768188	0.936298503174345	Promoter (<=1kb)	DAB1
cluster_1	chr1_5830612_5831177	15.476077286216	7.22642732818983	4.91553933757095	3.00113654293242	0.86224946416219	Distal Intergenic	MIR4689
cluster_1	chr1_58576584_58577779	13.7793701953781	3.77143023142007	2.67315627442339	1.82548401531285	0.977878765419908	Promoter (<=1kb)	TACSTD2
cluster_1	chr1_59077874_59078705	22.0461445969464	2.47582105196164	1.80091856544774	0.884683837815094	0.954806317759387	Exon (ENST00000451090.1/ENST00000451090.1, exon 1 of 3)	LINC01358
cluster_1	chr1_59084016_59084795	9.99601030550964	2.3715132853789	1.53425721754455	3.52051650670285	0.797019285293187	Intron (ENST00000634502.1/101926925, intron 12 of 13)	LINC01358
cluster_1	chr1_59116490_59117501	11.3712899019341	3.44912760223762	2.17091352206742	0.907519559405052	0.93312260504034	Intron (ENST00000634569.1/101926925, intron 4 of 5)	HSD52
cluster_1	chr1_59146577_59147439	14.3212153602079	8.09367150240661	5.84434397191334	5.74227108604009	0.901212318360774	Promoter (<=1kb)	HSD52
cluster_1	chr1_59759159_59759872	14.4568029239166	5.31028238698636	7.19126566048227	6.65129263826302	0.773049444136759	Intron (ENST00000634606.1/55277, intron 13 of 16)	FGGY
cluster_1	chr1_59926337_59927145	13.6779527625803	5.99082497424546	3.07561042737189	5.77424677533353	0.801705730225581	Promoter (<=1kb)	CYP2J2
cluster_1	chr1_60073561_60074291	13.4862089055941	4.46919835985649	2.38267217649485	1.16904162590855	0.921709154335162	Promoter (<=1kb)	C1orf87
cluster_1	chr1_6025796_6026522	13.33536390362	4.55428253111155	3.4148088427508	1.43474579334629	0.904801396485511	Promoter (<=1kb)	KCNAB2
cluster_1	chr1_6033938_6034902	17.4931302830497	8.04631202765315	7.57003900680186	4.07145185669802	0.834876585276223	Promoter (<=1kb)	KCNAB2
cluster_1	chr1_60886726_60887474	13.6447395145837	6.22259364333365	2.12234274387752	2.0157879817522	0.827605997862627	Intron (ENST00000371191.5/4774, intron 1 of 10)	LOC101926964
cluster_1	chr1_61005514_61006513	16.4294322657229	6.24270571767731	5.1749959528842	1.9688481367128	0.860336511059708	Intron (ENST00000371191.5/4774, intron 1 of 10)	NFIA-AS2
cluster_1	chr1_61042484_61043999	11.165801955705	6.7658694325568	3.39778856114937	5.90094246007338	0.708650755470584	Intron (ENST00000371191.5/4774, intron 1 of 10)	NFIA
cluster_1	chr1_6148396_6149291	18.2795665872374	12.2130146641006	10.0539526058387	5.9645031567576	0.693403766914315	Exon (ENST00000262450.8/26038, exon 8 of 42)	CHD5
cluster_1	chr1_61641613_61642242	13.5221403253162	5.26881238899886	3.63969361470269	3.06339843342012	0.960865821067486	Distal Intergenic	MGC34796
cluster_1	chr1_6204856_6205602	29.0598230955066	15.6687846406504	9.63242551279591	6.44902307329645	0.80903956579657	Promoter (<=1kb)	RNF207
cluster_1	chr1_6205858_6206485	26.0913415966809	14.4089371649073	7.70904695963584	12.5891553991399	0.7681392472647	Promoter (<=1kb)	RNF207
cluster_1	chr1_62181074_62183108	13.808606086755	3.87655261984608	1.82871539691521	1.50860731190092	0.966589495896939	Distal Intergenic	L1TD1
cluster_1	chr1_62194390_62195219	34.9501620023437	6.5154415369521	3.98821954150575	1.47323798754813	0.975483278744705	Promoter (<=1kb)	L1TD1
cluster_1	chr1_62198104_62199023	34.4345977912689	3.61860493354914	2.15713540776252	1.4209424552096	0.955421217104991	Intron (ENST00000498273.2/54596, intron 2 of 3)	L1TD1
cluster_1	chr1_62212493_62214026	14.4748432284289	0.278285562914528	0.710137728560814	0.9620147799256	0.884041359846068	Downstream (<=300bp)	L1TD1
cluster_1	chr1_62279074_62279814	14.5772836016915	6.06479628760374	2.33727368401174	2.21825664215558	0.869795106683475	Intron (ENST00000371153.9/163782, intron 2 of 9)	KANK4
cluster_1	chr1_62327265_62328153	15.1136725347091	1.77381940372908	1.21581351513646	0.829159557379957	0.953990372078243	Distal Intergenic	KANK4
cluster_1	chr1_6241841_6242680	28.0604511499091	20.7902869586835	15.2696868647894	7.54002271518415	0.59952076144293	Promoter (1-2kb)	HES3
cluster_1	chr1_6245085_6246433	38.0821339434943	23.6720346251198	19.8389420628584	8.45809354511217	0.668172967906475	Promoter (<=1kb)	HES3
cluster_1	chr1_6249085_6249553	22.1484413924313	12.4797538851183	5.76528811406996	3.89791931978895	0.756594810825053	3' UTR	HES3
cluster_1	chr1_62755754_62756804	8.41701017978144	0.932362311659687	0.490208434063483	0.705130509732995	0.937126971055225	Distal Intergenic	ATG4C
cluster_1	chr1_62962881_62963636	14.3770829254387	5.11421612393868	4.46833600389393	2.98992609369601	0.945206211511425	Distal Intergenic	LINC01739
cluster_1	chr1_63189572_63190394	13.9085904646484	1.84257540912806	1.43592105985801	0.556280013688119	0.958169048360172	Exon (ENST00000455304.6/199899, exon 5 of 5)	LINC00466
cluster_1	chr1_63294678_63295496	14.1134320150489	3.08970904730405	3.10563660142313	4.87247527820539	0.809443856370093	Intron (ENST00000666431.1/199899, intron 2 of 10)	LINC00466
cluster_1	chr1_63316826_63317841	39.8323263145716	7.69403540413461	6.0574319765373	2.84466550651982	0.963659273453701	Promoter (<=1kb)	LINC00466
cluster_1	chr1_63327552_63327987	31.0020915564496	14.506101817081	6.59491697295007	3.25823844739323	0.810991222447688	Promoter (<=1kb)	MIR6068
cluster_1	chr1_63441311_63442081	10.019670891396	3.59706792946371	4.21825651448083	5.08186321239281	0.757870826119407	Intron (ENST00000492655.1/23421, intron 1 of 1)	ITGB3BP
cluster_1	chr1_63574011_63574849	16.223672101161	1.86705818161787	1.07710328286045	0.818056933289912	0.957468168837382	Intron (ENST00000478138.1/23421, intron 1 of 4)	PGM1
cluster_1	chr1_63782832_63783651	22.6980991543803	1.67496269799909	1.63583432020696	1.07725792014238	0.928043087012577	Intron (ENST00000371079.6/4919, intron 1 of 8)	ROR1
cluster_1	chr1_6385524_6386385	16.7930732255222	7.42825544387598	4.1492838116082	12.3521027198278	0.522138856880337	Promoter (<=1kb)	ACOT7
cluster_1	chr1_6414282_6414798	17.6853921573223	6.0203315980122	4.63262802271296	6.52778352781097	0.874546051483729	Intron (ENST00000377837.5/54626, intron 3 of 3)	HES2
cluster_1	chr1_6423415_6423929	19.7300025804709	7.81212559571008	5.73841524180007	5.33261209498913	0.978121145010608	Promoter (<=1kb)	HES2
cluster_1	chr1_6437968_6438456	18.5113049202094	5.79203143819779	7.21404148109118	5.33501543358318	0.870026442873891	Promoter (<=1kb)	ESPN
cluster_1	chr1_6440216_6441052	19.8483691139375	12.0402489987999	8.40187952922052	4.74229970071082	0.737158469037828	Promoter (<=1kb)	ESPN
cluster_1	chr1_6447029_6448524	39.2718509480067	13.3152147666271	10.4602886430029	6.99015436942023	0.95679618587664	Promoter (<=1kb)	ESPN
cluster_1	chr1_64472799_64473326	42.048980496238	8.57374030179967	8.24078809416157	2.63539316429351	0.931317911899641	Promoter (2-3kb)	CACHD1
cluster_1	chr1_6448554_6449473	22.7866369450567	13.075328968445	9.35018517743132	8.02278925999331	0.862225649242018	Promoter (<=1kb)	ESPN
cluster_1	chr1_64497180_64497931	26.2048929129462	5.7205999815516	9.19426004530272	10.1159316348669	0.754087418857413	Intron (ENST00000651257.2/57685, intron 1 of 26)	CACHD1
cluster_1	chr1_6454858_6455822	18.2257071068038	2.94717708448849	2.74674576339853	1.98842365693013	0.942706467804488	Exon (ENST00000636330.1/83715, exon 11 of 11)	ESPN
cluster_1	chr1_6465541_6466544	14.4616438116287	5.06311350996392	1.53633639935907	2.19450916101273	0.90001705094168	Promoter (<=1kb)	TNFRSF25
cluster_1	chr1_6470841_6471864	19.737780044552	1.86393039716424	1.23305908206281	1.90456248057311	0.918086203286048	Promoter (<=1kb)	PLEKHG5
cluster_1	chr1_6486189_6486857	25.5115225860753	14.9526511192204	10.3293954671925	8.12829201364698	0.821733268219347	Promoter (<=1kb)	PLEKHG5
cluster_1	chr1_65026101_65026908	15.4952145844037	1.79085880630681	1.54673031298449	2.68892689010926	0.877515236081624	Intron (ENST00000671954.2/3716, intron 2 of 25)	LINC01359
cluster_1	chr1_65148385_65149635	19.7399735036806	12.1264836740938	9.59076493069402	15.39804508607	0.567966369589307	Promoter (<=1kb)	AK4
cluster_1	chr1_65265273_65266427	20.5098459893347	10.9812511553643	11.2150012331748	7.64254282455017	0.829162343414377	Promoter (<=1kb)	DNAJC6
cluster_1	chr1_65278460_65279548	8.7327063954162	4.19730052126728	2.14716621593849	3.81788003341778	0.793987648258121	Exon (ENST00000435739.1/102724416, exon 2 of 2)	DNAJC6
cluster_1	chr1_65550035_65551005	17.1543312827922	5.38767392863994	1.94322211812471	1.58993278191586	0.929128970007219	Intron (ENST00000371059.7/3953, intron 2 of 19)	LEPR
cluster_1	chr1_66725753_66726417	8.56405947161102	2.77509303695096	4.22554968705532	5.68944340471182	0.565201116363441	Intron (ENST00000682707.1/84251, intron 17 of 22)	SGIP1
cluster_1	chr1_67341905_67342746	18.6637261733563	1.50292327602561	1.54566838843478	0.606271891695856	0.933974210543112	Promoter (<=1kb)	IL12RB2
cluster_1	chr1_67458648_67459424	22.985410981326	2.05832938015257	2.87662848673689	3.05040058312364	0.882483164582131	Distal Intergenic	SERBP1
cluster_1	chr1_68051454_68051990	12.2565187037855	4.237078772291	5.09109245794696	3.23119038744903	0.863564983722073	Promoter (<=1kb)	DIRAS3
cluster_1	chr1_6956609_6957239	18.2449136406746	2.58536195601622	1.59842281697899	1.02930978152863	0.967410606184289	Intron (ENST00000303635.12/23261, intron 3 of 22)	CAMTA1
cluster_1	chr1_6962067_6963981	67.6007973278303	49.6865298855885	32.5851782907398	12.57120072417	0.587213215174383	Intron (ENST00000303635.12/23261, intron 3 of 22)	CAMTA1
cluster_1	chr1_70685133_70685730	15.0807429055448	3.4377037276301	3.8130914041134	3.83646130688133	0.890888862471456	Distal Intergenic	LINC01788
cluster_1	chr1_70706191_70707121	15.1949027571352	3.58460862910455	3.05480249570394	1.53161183163385	0.953682222512923	Promoter (<=1kb)	LINC01788
cluster_1	chr1_7297867_7298543	16.393104061134	2.63536672634666	1.30818261936342	2.06438632209484	0.939600635792004	Intron (ENST00000303635.12/23261, intron 5 of 22)	CAMTA1
cluster_1	chr1_75074697_75075596	11.2449150094622	3.0480219310111	1.79789761499242	1.81608640360468	0.978942329668375	Distal Intergenic	LHX8
cluster_1	chr1_75092024_75092643	18.6084878088529	1.20655149442526	1.02751459416657	0.858414317291109	0.926764682335735	Distal Intergenic	LHX8
cluster_1	chr1_75130841_75131828	12.3760879291147	7.44413931126851	6.89310101258098	2.43129253070269	0.640613954520156	Promoter (2-3kb)	LHX8
cluster_1	chr1_75135859_75136925	18.8047962576355	10.8625658930272	9.77597542121435	3.80318835024242	0.681764912277354	Promoter (1-2kb)	LHX8
cluster_1	chr1_7536103_7537009	10.144315304642	4.1128805630395	3.95115050375437	2.50720834422229	0.902233706661674	Intron (ENST00000303635.12/23261, intron 6 of 22)	CAMTA1-AS1
cluster_1	chr1_75672194_75673163	7.2756663544797	2.53498038605736	0.878583812224945	2.71429855136499	0.778985622601888	Intron (ENST00000648424.1/204962, intron 2 of 2)	SLC44A5
cluster_1	chr1_75677690_75678592	10.4765991096687	1.91333208141441	0.989224344564392	0.884496637152414	0.977988979931413	Intron (ENST00000648424.1/204962, intron 2 of 2)	SLC44A5
cluster_1	chr1_75796638_75797825	12.8745565438304	1.39833921825863	0.977674551412725	1.73477231523002	0.901118484746984	Promoter (<=1kb)	MSH4
cluster_1	chr1_76052931_76053625	14.9521995967223	6.90260983783075	7.40027012249988	3.04770702477734	0.751135236472141	Intron (ENST00000434540.1/ENST00000434540.1, intron 1 of 1)	ST6GALNAC3
cluster_1	chr1_77514290_77515949	10.9997942050768	4.59222076845759	4.24412914469623	3.80113212425158	0.967817415515082	Intron (ENST00000354567.7/26289, intron 10 of 13)	AK5
cluster_1	chr1_77687272_77688176	15.2478240818958	2.91279144224994	2.71766838430544	1.87489717938019	0.947934035897497	Distal Intergenic	ZZZ3
cluster_1	chr1_7885339_7886267	36.25448628086	0.649729114112965	1.25741948124257	2.1921761076406	0.88920049950749	Distal Intergenic	UTS2
cluster_1	chr1_79006372_79007102	15.4889523239758	5.21561609411122	4.20517567494481	3.68267962832587	0.982759571544107	Promoter (<=1kb)	ADGRL4
cluster_1	chr1_79193079_79193899	10.8648852333376	1.31855329465924	2.71969212786367	1.45693082616116	0.842738500438038	Intron (ENST00000661030.1/64123, intron 1 of 16)	ADGRL4
cluster_1	chr1_79262633_79263394	13.3706335840424	2.05926777012326	1.00991329024398	1.33029339305912	0.953746781740938	Intron (ENST00000661030.1/64123, intron 1 of 16)	ADGRL4
cluster_1	chr1_7942208_7942761	14.7544145460961	6.93346782198788	5.41089878526182	2.91410966500287	0.843945705272901	Promoter (<=1kb)	TNFRSF9
cluster_1	chr1_7991637_7992452	26.167244114349	3.99833953613163	1.76195827418238	2.9894816026313	0.941160394734568	Intron (ENST00000641354.1/ENST00000641354.1, intron 1 of 5)	ERRFI1
cluster_1	chr1_81312191_81312971	18.7348713140476	1.48683849490335	2.20330282927843	1.44802560522798	0.903319145785901	Intron (ENST00000674378.1/23266, intron 1 of 5)	ADGRL2
cluster_1	chr1_81414305_81415094	8.79617145314615	5.09745665837947	3.46274279903834	1.36340439123471	0.713401784300362	Promoter (<=1kb)	ADGRL2
cluster_1	chr1_81547203_81547979	20.0487695047736	2.95289541087087	5.18624409245636	2.44587340646885	0.857032409473391	Intron (ENST00000674378.1/23266, intron 3 of 5)	LOC101927434
cluster_1	chr1_8166847_8167690	13.7759394879532	1.49577552743327	0.914643132343651	2.44660757296896	0.866531906006402	Distal Intergenic	LINC01714
cluster_1	chr1_8216853_8217809	13.5177951024038	5.88781371935163	4.04071491171062	5.34975617267346	0.89629210834314	Distal Intergenic	LINC01714
cluster_1	chr1_8348930_8349488	15.514926977044	9.86518659367438	5.35903533880166	3.54487081656946	0.713536722008614	Distal Intergenic	RERE
cluster_1	chr1_83860345_83861275	15.1069073502416	1.82721444958894	2.81104171101726	3.23301400977391	0.842078182720926	Promoter (<=1kb)	LOC101927560
cluster_1	chr1_8443368_8444254	24.8084511953726	2.86203307647803	2.13652087613115	2.39143307089359	0.931186952109691	Intron (ENST00000337907.7/473, intron 12 of 23)	RERE-AS1
cluster_1	chr1_84740031_84741018	7.8968369915703	2.10246241387009	3.8052133090399	3.52346568334744	0.691219710399749	Distal Intergenic	SSX2IP
cluster_1	chr1_84763575_84764739	8.44011978381179	2.12358217095222	2.96498680963368	3.57695761227904	0.753359534311741	Distal Intergenic	SSX2IP
cluster_1	chr1_84774648_84775670	7.816322850439	2.16670204690011	2.07650927097353	4.26567371559522	0.654385860567815	Distal Intergenic	SSX2IP
cluster_1	chr1_84781995_84782916	7.899850672233	1.52767880358461	2.36269222333896	1.38806998073639	0.856499717729746	Distal Intergenic	LPAR3
cluster_1	chr1_85343343_85344704	9.17785647993917	2.31997007908949	2.97534965347183	2.98317401660432	0.841048827823674	Intron (ENST00000654182.1/646626, intron 2 of 2)	DDAH1
cluster_1	chr1_85607046_85607923	26.6365133779706	10.3373538367688	5.75711805751602	11.4186045599789	0.791984507678517	Distal Intergenic	CCN1
cluster_1	chr1_86154743_86155534	13.4641409356364	6.23996089696991	3.74788157908573	3.35982270941881	0.900979280464616	Promoter (1-2kb)	COL24A1
cluster_1	chr1_86502125_86503509	13.0036676500767	3.08347764609461	1.85973682588487	2.95183975104096	0.913628582445764	Distal Intergenic	CLCA1
cluster_1	chr1_86833475_86834124	10.9470866685133	2.59611042405683	3.56720975183398	3.79972950599212	0.809418671329287	Promoter (<=1kb)	LOC105378831
cluster_1	chr1_87200775_87201617	9.26562986575088	2.18948297724401	0.656574252874546	1.60936146054503	0.916393911092869	Distal Intergenic	LINC02801
cluster_1	chr1_89910681_89911250	28.1884129713043	10.5944041870399	8.86983687663552	8.15010525378973	0.982020497896882	Intron (ENST00000370453.5/55144, intron 3 of 3)	LRRC8D
cluster_1	chr1_89929103_89930124	18.3106087636936	1.00661549675366	0.950326119119546	1.96925836527461	0.883904213127705	5' UTR	GEMIN8P4
cluster_1	chr1_9009154_9010438	15.4910928781514	5.07265230664601	1.64450347534916	1.37200630759282	0.913629940558548	Exon (ENST00000400906.2/155184, exon 9 of 12)	SLC2A7
cluster_1	chr1_90219064_90219971	16.7864078206651	4.41824973046934	3.81957769683763	2.86964767314845	0.965224157112453	Distal Intergenic	LOC105378849
cluster_1	chr1_90561548_90562435	21.7700843433294	2.76897235960243	5.31208143671976	0.979639602396682	0.849461598341754	Distal Intergenic	LINC02787
cluster_1	chr1_90974030_90974931	8.47032840133355	2.5410666013566	2.74891361067427	3.46861166687607	0.814052062416654	Intron (ENST00000370440.5/84146, intron 2 of 5)	ZNF644
cluster_1	chr1_91644881_91645622	14.5638867307103	7.80486037340339	5.91689879576953	3.38097574869462	0.802392997991941	Distal Intergenic	TGFBR3
cluster_1	chr1_92080016_92081021	42.5512351801094	20.3808781705527	20.5119981806377	23.5047528161277	0.824988300176073	Promoter (<=1kb)	BTBD8
cluster_1	chr1_92480385_92481317	15.2472564786454	9.05739413629702	7.46467541108086	2.68606841900832	0.673111465043856	Promoter (<=1kb)	GFI1
cluster_1	chr1_9249807_9250407	13.9264980726025	5.98914373103011	4.65531501541237	5.8262602861525	0.901270509403534	Intron (ENST00000377403.7/9563, intron 3 of 4)	H6PD
cluster_1	chr1_9266832_9267568	15.1713162569275	9.07342859167391	6.07666913709409	5.37400432054254	0.829728275881406	3' UTR	SPSB1
cluster_1	chr1_93410928_93411978	14.7757492676193	0.48313506005946	0.380590798990575	0.889679650190649	0.900920524750119	Distal Intergenic	FNBP1L
cluster_1	chr1_94012529_94013559	8.97052681443784	2.93754318365645	1.89375682411	2.86804906740307	0.892980049086262	Promoter (1-2kb)	ABCA4
cluster_1	chr1_9455733_9456234	13.0354173395303	9.86768348058966	4.98505670376271	4.43187716335507	0.63623989262581	Distal Intergenic	LINC02606
cluster_1	chr1_94660844_94661719	13.4187547321362	4.25369747659812	4.18679099865175	3.54546642483233	0.943112356248335	Promoter (2-3kb)	SLC44A3-AS1
cluster_1	chr1_94688504_94689357	17.9282769480986	7.2027815240585	9.2432995390823	1.14552313678094	0.658632001180847	Intron (ENST00000634870.1/101928079, intron 2 of 5)	SLC44A3-AS1
cluster_1	chr1_94819562_94820812	20.2396720115604	11.3324567403157	9.54618860758219	12.3096142504801	0.796237451315408	Promoter (<=1kb)	SLC44A3-AS1
cluster_1	chr1_9494924_9495850	10.4069385584548	3.93057774508202	3.39300601753131	3.10286580870748	0.977665576131794	Distal Intergenic	SLC25A33
cluster_1	chr1_9626861_9627603	19.114205808773	6.91162682618403	5.4441111279732	6.38083999827102	0.934786336696644	Promoter (2-3kb)	PIK3CD
cluster_1	chr1_96715137_96716004	23.2095464176826	0.910496522074403	0.622978512927086	1.69078940917344	0.897376568703301	Distal Intergenic	PTBP2
cluster_1	chr1_9714193_9714971	34.418845680883	2.15747243848629	1.07046761951424	2.15568672787784	0.919411303424536	Promoter (<=1kb)	PIK3CD
cluster_1	chr1_9717352_9718032	17.012086257202	5.7347138605753	1.29332280113326	3.30499087605314	0.874908964006855	Promoter (<=1kb)	PIK3CD
cluster_1	chr1_9721477_9722113	16.0655754838557	7.12222870950504	1.68036742482707	2.75410831460773	0.817979753468289	Promoter (<=1kb)	PIK3CD
cluster_1	chr1_9724850_9725369	19.8362866738312	2.65513775220696	1.81332948433668	2.16043790756702	0.936185016316574	3' UTR	PIK3CD
cluster_1	chr1_99003814_99006035	15.2013427342082	11.2249483375536	10.2524099847819	4.40221392882447	0.546177266639747	Promoter (<=1kb)	PLPPR5-AS1
cluster_1	chr1_99514584_99515499	13.0084409974475	0.788430439250736	0.593308825972644	1.02541746553708	0.906995599498784	Intron (ENST00000635551.1/101928270, intron 2 of 4)	LINC01708
cluster_1	chr1_9960752_9961608	8.6919484603588	3.80141304369665	2.08796350928093	2.96612771533814	0.883623076374264	Promoter (<=1kb)	TMEM274P
cluster_1	chr10_100300910_100301606	20.0288711198604	2.2897677674364	0.678814782162156	1.38320792096349	0.946413901363521	Intron (ENST00000318222.4/9033, intron 2 of 15)	BLOC1S2
cluster_1	chr10_100364630_100365437	8.57764204053434	1.09427255147811	0.972656481464793	5.41585733180215	0.529539951590398	3' UTR	OLMALINC
cluster_1	chr10_100637744_100638401	14.2144332628362	6.3234392580405	2.97410840562388	1.85388978494847	0.845907651777627	Distal Intergenic	PAX2
cluster_1	chr10_100729109_100730169	12.4339681639991	6.76874039515773	5.0021843126453	3.00041133083703	0.804256374461985	Distal Intergenic	PAX2
cluster_1	chr10_100737263_100737940	16.8248841534477	4.63301264526808	2.43022518969028	1.7170268390361	0.97079204436944	Promoter (1-2kb)	PAX2
cluster_1	chr10_100745103_100746286	22.6362051804262	12.0501748728519	9.30637990896797	6.42155299262269	0.850530226434091	Promoter (<=1kb)	PAX2
cluster_1	chr10_101018310_101019485	14.4330173230491	11.3321422501296	6.93757681935097	4.10728342132195	0.589550507366723	3' UTR	PDZD7
cluster_1	chr10_101050096_101050669	13.04132024655	7.74509511424035	7.41850355723869	3.63823574536988	0.693492970750957	Distal Intergenic	KAZALD1
cluster_1	chr10_101095374_101096089	32.5019851551181	6.1013109783729	3.32605780940915	5.01004379719463	0.93757123175819	Intron (ENST00000445873.5/100038246, intron 2 of 2)	KAZALD1
cluster_1	chr10_101139581_101140266	10.1314630821985	6.28356333858957	4.49411485989104	2.04102008774489	0.69293626133422	Distal Intergenic	TLX1
cluster_1	chr10_101146618_101147479	9.68155249125747	4.57724618437617	3.78985119497087	1.51059157642998	0.791478213369815	Distal Intergenic	TLX1
cluster_1	chr10_101161578_101162435	13.0491966930591	5.76085297905844	4.20655249627789	4.2896565510123	0.964930908668081	Distal Intergenic	LINC01514
cluster_1	chr10_101236342_101237571	17.9003994057289	6.43870034389418	4.05625895537278	3.1248092522628	0.952677087730961	Promoter (<=1kb)	LBX1-AS1
cluster_1	chr10_101272124_101272846	14.9642382529112	5.3890702040243	2.96972851317948	2.91615483172418	0.950084442674341	Distal Intergenic	LINC02681
cluster_1	chr10_101284051_101284647	13.3984690645016	9.85389137178307	6.09256528642349	4.16067564487541	0.648294772167425	Promoter (<=1kb)	LOC105378453
cluster_1	chr10_101285507_101286149	26.1046930536143	6.54405045713887	3.14345924805712	1.10127026726469	0.956087383822475	Promoter (1-2kb)	LOC105378453
cluster_1	chr10_101297838_101298350	12.6107488087531	8.26608715759906	4.48365470079525	8.13405962242751	0.628250127884795	Distal Intergenic	LOC105378453
cluster_1	chr10_101310335_101311747	13.0171500580433	5.17841715878244	2.75381699610474	4.08474115211343	0.893954936910993	Exon (ENST00000442188.1/ENST00000442188.1, exon 1 of 2)	LOC105378453
cluster_1	chr10_101566129_101566816	5.98564877966556	4.06514031046479	1.75893414682396	3.13972585845216	0.652841176833432	Distal Intergenic	DPCD
cluster_1	chr10_101643539_101644617	27.5437615311354	10.0732115767887	8.61374742633497	2.82759822835491	0.853576925203141	Intron (ENST00000331272.9/6468, intron 5 of 8)	FBXW4
cluster_1	chr10_101759282_101760158	14.2988657005575	9.22527784713552	4.27899977057094	1.99827793420258	0.669396880690288	Distal Intergenic	FGF8
cluster_1	chr10_101779077_101779483	22.8655029550463	15.5600491407386	12.3894065240658	4.87835350249974	0.613408584489405	Promoter (<=1kb)	FGF8
cluster_1	chr10_101843362_101844151	28.7826625593356	10.9775950004544	6.46790807073889	3.06443863171055	0.888773800788837	Promoter (<=1kb)	KCNIP2
cluster_1	chr10_102229845_102232149	18.3611616063193	12.7776203504576	7.89161308956833	11.7400885291364	0.671856441701751	Promoter (<=1kb)	PITX3
cluster_1	chr10_102403772_102404196	24.1985149533373	8.86276126030877	8.43209721842876	7.22218842688292	0.955552249540686	Promoter (1-2kb)	PSD
cluster_1	chr10_102435466_102435981	18.6424869552205	8.81341966456441	3.86251547555683	5.71077796234289	0.844013082577594	Promoter (<=1kb)	MIR146B
cluster_1	chr10_103281649_103282223	21.4998861052756	12.1821149393651	7.48311684628866	2.55190418122702	0.715383797507864	Intron (ENST00000369849.9/9118, intron 1 of 2)	NT5C2
cluster_1	chr10_103458744_103459329	11.5329666598468	6.03030958081227	3.66624345376062	2.71798092864889	0.835259033396908	Promoter (<=1kb)	CALHM1
cluster_1	chr10_103476257_103477154	11.1132910527654	6.5328979683102	4.28111983877516	2.01014934228098	0.725837120475596	Promoter (2-3kb)	CALHM3
cluster_1	chr10_103840119_103840973	13.6730074600865	5.01904962704359	3.52108463206937	2.84770003947332	0.967192587993846	Intron (ENST00000369774.9/9644, intron 1 of 14)	SH3PXD2A
cluster_1	chr10_104067011_104067850	10.078728367893	4.95706915667292	5.48618689408701	1.7233478026514	0.676820069347606	Promoter (2-3kb)	COL17A1
cluster_1	chr10_104291184_104292076	18.1336540762925	9.79385815710581	7.82659656165664	7.26527565300289	0.945473838398187	Exon (ENST00000477078.2/119391, exon 6 of 7)	GSTO2
cluster_1	chr10_104638810_104639286	18.3846390921184	10.0931267285138	9.04256472241859	4.48712055277615	0.751038571706453	Promoter (2-3kb)	SORCS3
cluster_1	chr10_104680545_104681556	12.9931280173536	6.26896693328329	5.39995471649767	3.65500165155675	0.88649101672939	Intron (ENST00000369701.8/22986, intron 1 of 26)	SORCS3-AS1
cluster_1	chr10_108204177_108205209	8.95312036124623	2.62358091114522	3.09954702977683	2.71021837325022	0.883400176352143	Distal Intergenic	LINC01435
cluster_1	chr10_109934201_109935659	27.7217036558236	7.55475349518537	6.86576367562636	8.5529210436597	0.887726951617523	Distal Intergenic	XPNPEP1
cluster_1	chr10_110168837_110169587	21.7429750073111	1.45308282753642	2.19563705415221	2.11413430080054	0.890558209652021	Distal Intergenic	MXI1
cluster_1	chr10_110353217_110354714	7.31630468429831	3.22876516271166	2.73506760873334	2.65898517994316	0.982845128491814	Distal Intergenic	SMNDC1
cluster_1	chr10_110499204_110499808	19.5405802045378	9.09182164343776	4.95788777383179	4.69938746123731	0.885254488995382	Promoter (1-2kb)	DUSP5
cluster_1	chr10_110529610_110530847	21.4785570557562	7.51240697956484	4.12584515698273	2.92123461544679	0.93639306810043	Distal Intergenic	DUSP5
cluster_1	chr10_111136714_111137465	26.9102943307228	6.58727173956915	7.0404504078019	3.29205037325572	0.91463794523886	Distal Intergenic	ADRA2A
cluster_1	chr10_111999188_111999942	11.1820578962066	4.55937420330923	3.63726918245368	2.18845482214279	0.906703424093067	Distal Intergenic	NA
cluster_1	chr10_112140097_112140573	14.7959747392708	5.93706045230174	7.12411376571259	5.95603314058449	0.852528863114082	Distal Intergenic	GPAM
cluster_1	chr10_11270359_11271208	13.4045535320109	6.70571868780845	5.09464353170273	6.5599003934878	0.867514487756651	3' UTR	CELF2-AS1
cluster_1	chr10_112811712_112812888	19.0154247780943	4.96725469374683	6.73243024867378	12.9711955896984	0.536494202791486	Intron (ENST00000393077.3/143187, intron 7 of 7)	NA
cluster_1	chr10_112831933_112833062	27.1016453260254	5.99961383471808	6.22222625648213	3.76329497266514	0.934238376352257	Exon (ENST00000624062.1/ENST00000624062.1, exon 1 of 1)	LOC103344931
cluster_1	chr10_112898340_112899503	23.5194529961178	11.958594942394	8.95190911975876	4.7213263774715	0.80998919807869	Intron (ENST00000428766.2/107984158, intron 2 of 2)	LINC02935
cluster_1	chr10_113053773_113054447	27.0259150412058	4.92880098049485	4.23488240556792	1.50748114940374	0.951783312348693	Intron (ENST00000355995.9/6934, intron 5 of 14)	TCF7L2
cluster_1	chr10_113134740_113135546	17.0442014271975	12.7321068592121	5.54639380377872	2.00446897584477	0.585886358176905	Promoter (1-2kb)	TCF7L2
cluster_1	chr10_113558008_113558821	16.1771032017163	6.4496235200171	4.53541757601676	4.07383614586431	0.967441339145226	Intron (ENST00000542051.5/3026, intron 1 of 12)	HABP2
cluster_1	chr10_113616725_113617472	11.6135284905746	3.70059906378028	2.72575887558656	1.06352304353989	0.914324687261443	Exon (ENST00000359988.4/4892, exon 26 of 42)	NRAP
cluster_1	chr10_114239155_114240246	14.5886452374629	6.04770193024366	5.65894566437347	4.18846835855266	0.937105775847721	Promoter (<=1kb)	VWA2
cluster_1	chr10_114489421_114490246	12.7979436509069	8.25580774388206	5.37341242320552	3.22408315166843	0.710031228736202	Promoter (1-2kb)	ABLIM1
cluster_1	chr10_114874750_114875442	14.1534242147164	3.89188596690093	4.05666070173084	2.22655579234141	0.918908400345867	Intron (ENST00000369250.7/57700, intron 16 of 16)	FHIP2A
cluster_1	chr10_116608961_116610171	18.7734458471928	9.34047626220216	8.03245757787045	3.98784968774878	0.800958783739876	3' UTR	PNLIPRP2
cluster_1	chr10_116627292_116628146	17.0011240895574	6.93213478574541	6.93992788572571	5.23547037872125	0.927269296397016	Exon (ENST00000579578.6/5408, exon 6 of 13)	PNLIPRP2
cluster_1	chr10_116669717_116670701	22.1294940344632	5.28700646615536	4.44778742687193	3.61741188002419	0.963633205704222	Promoter (<=1kb)	HSPA12A-AS1
cluster_1	chr10_116787766_116788465	9.97008786819045	5.84434183350963	3.91852641747703	7.97457322570646	0.511813047904031	Intron (ENST00000635765.1/259217, intron 2 of 12)	HSPA12A
cluster_1	chr10_117084242_117085207	10.3268395944994	1.74935119076025	0.984064768825858	1.22877459672601	0.95211858620077	Intron (ENST00000392901.10/57698, intron 1 of 17)	SHTN1
cluster_1	chr10_117162699_117163559	21.6784582949113	11.9711615383494	9.88550255858196	5.99090761446857	0.803151073978734	Intron (ENST00000654523.1/101927704, intron 1 of 3)	MIR3663
cluster_1	chr10_117240152_117242058	11.9814780222286	6.74909751977187	3.77457001265976	3.48294551640636	0.816049708109159	Promoter (<=1kb)	SLC18A2-AS1
cluster_1	chr10_117346485_117347312	25.3566534809646	0.745627930783513	0.665984565720229	1.35854426965352	0.902555071552603	Intron (ENST00000334464.7/118987, intron 1 of 4)	PDZD8
cluster_1	chr10_118594180_118594868	31.7731272664071	13.4036047171121	10.5361567828743	4.85166963704657	0.85591559356452	Promoter (<=1kb)	PRLHR
cluster_1	chr10_118759743_118760822	14.3338795963718	3.83306782148238	3.93145561340468	8.04223954514658	0.637084997809865	Distal Intergenic	CACUL1
cluster_1	chr10_11936160_11937247	11.5983588349436	1.42086381579023	0.422230419568571	1.81151989331574	0.884534677546775	Exon (ENST00000356352.6/26019, exon 18 of 21)	PROSER2-AS1
cluster_1	chr10_119489504_119490169	14.1275537571191	6.68248518378432	4.86469203395084	1.81928555443115	0.795064093433405	Distal Intergenic	RGS10
cluster_1	chr10_119686523_119688471	19.5517011036664	14.8347704973428	14.6133697835308	6.8710154173663	0.517701636315041	Distal Intergenic	BAG3
cluster_1	chr10_121542332_121543310	7.47969152453007	2.2522983388735	1.55994617009904	1.61896921127222	0.974260342059275	Intron (ENST00000358487.10/2263, intron 5 of 17)	FGFR2
cluster_1	chr10_121579554_121581184	23.5383775264542	5.70713611007295	3.87758273672367	3.78577251159315	0.973701840105339	Intron (ENST00000358487.10/2263, intron 2 of 17)	FGFR2
cluster_1	chr10_121608221_121609215	11.2719188871029	4.55113484532385	3.76782553382503	8.63527898502953	0.508210239937691	Distal Intergenic	FGFR2
cluster_1	chr10_121890989_121891678	41.9506758697159	2.34039270219976	1.14684038864192	1.96625773420595	0.924521526195311	Intron (ENST00000693411.1/11101, intron 7 of 11)	ATE1
cluster_1	chr10_122142416_122143492	9.54341851062706	4.43764851244142	4.0990745017423	4.14117777077051	0.951898566263471	Intron (ENST00000369005.6/10579, intron 6 of 22)	TACC2
cluster_1	chr10_122342212_122342977	19.8295705662171	3.22089048984081	3.54759519796834	3.98890868412258	0.887117254105256	Distal Intergenic	BTBD16
cluster_1	chr10_122875785_122876769	17.2440717470845	4.9347005590312	2.55059076882895	1.02881430093291	0.940545338599029	Promoter (2-3kb)	FAM24B
cluster_1	chr10_123117571_123118483	16.5443913366085	3.20514166393472	1.47842821142043	1.71381086226355	0.970883981275869	Distal Intergenic	HMX3
cluster_1	chr10_123147816_123148200	25.7588798190992	11.2098369156752	5.77492976579034	5.29774329784485	0.893100072101732	Promoter (<=1kb)	HMX2
cluster_1	chr10_123150915_123151798	27.2036229344539	8.91233573570069	6.88640330154719	2.88506997763861	0.911424319125065	Promoter (2-3kb)	BUB3
cluster_1	chr10_123459163_123460221	18.624774504164	2.34495445190207	1.47306654084166	1.06716601881831	0.959150728247948	Intron (ENST00000448347.5/105378531, intron 4 of 4)	LINC02641
cluster_1	chr10_123558908_123559669	9.26975693236196	4.17708952926204	3.4407954881581	3.04814661505857	0.9759439022986	Promoter (<=1kb)	LINC02641
cluster_1	chr10_123972482_123973372	14.1252722129895	4.44018595376342	4.49196384074351	3.04520477844367	0.931317285253535	Distal Intergenic	CPXM2
cluster_1	chr10_123995137_123996221	20.0124016688669	10.1522269479567	8.52070081587817	5.69990879024598	0.866069372413463	Distal Intergenic	CHST15
cluster_1	chr10_124010652_124011364	29.1373569466943	8.12798536227583	4.69826763880728	2.92125764902247	0.967878875147056	Intron (ENST00000346248.7/51363, intron 7 of 7)	CHST15
cluster_1	chr10_124020407_124021329	12.0493033617777	2.81029434395234	1.35612926347405	2.1364915592139	0.939630885896274	3' UTR	CHST15
cluster_1	chr10_124403409_124404007	13.0650738226352	5.13511954083665	4.77425221871686	3.67276429930564	0.950942095389041	Promoter (<=1kb)	OAT
cluster_1	chr10_124449809_124450490	20.1278039548521	9.93797999164939	8.21776195813909	8.91279002874725	0.950505070252223	Promoter (<=1kb)	NKX1-2
cluster_1	chr10_124469702_124470629	44.0868598207069	6.86736993540887	6.50548502353952	0.936158478529447	0.937045959935775	Intron (ENST00000368842.10/64077, intron 1 of 6)	LHPP
cluster_1	chr10_124530049_124530697	14.4864486196431	8.26023338137023	6.99651844447943	11.5699914605269	0.537006863289157	Intron (ENST00000368842.10/64077, intron 6 of 6)	LHPP
cluster_1	chr10_124565471_124566199	23.9409622281189	8.00271926935637	4.28983246453226	4.73524867632608	0.956446504109813	Intron (ENST00000368842.10/64077, intron 6 of 6)	LHPP
cluster_1	chr10_125047997_125048861	17.6702527314873	8.39123540120755	9.45170182870311	5.17273980571514	0.775915692288092	Intron (ENST00000337195.9/1488, intron 2 of 10)	MIR4296
cluster_1	chr10_125134987_125135861	10.8297284730697	1.58738500986126	1.58563533851415	1.19519150630044	0.932297707350086	Promoter (2-3kb)	CTBP2
cluster_1	chr10_125151598_125152507	43.2009191905813	4.35880467760246	3.64021433873379	4.37894830589511	0.917943014812149	Intron (ENST00000337195.9/1488, intron 1 of 10)	CTBP2
cluster_1	chr10_126686444_126687854	6.28212957418244	4.64646987513053	3.75574899808318	1.54422272944295	0.565983311588965	Intron (ENST00000657225.1/118611, intron 1 of 2)	C10orf90
cluster_1	chr10_126881742_126882662	20.9708706421403	5.4784467063043	2.07597080739984	1.94300436914503	0.963425511978311	Distal Intergenic	DOCK1
cluster_1	chr10_127735901_127737829	17.2396104921308	5.24029488688441	3.63466072425204	2.26788634407769	0.962713849825997	Promoter (<=1kb)	FOXI2
cluster_1	chr10_12774250_12775063	9.43228456546662	2.94770947894735	2.47784083158042	3.61162725053383	0.843271398764963	Intron (ENST00000619168.5/57118, intron 5 of 10)	MIR548Q
cluster_1	chr10_128047037_128047863	16.6922875871781	3.92805403621092	2.44734584130041	7.02652016982726	0.727419588210952	Promoter (<=1kb)	PTPRE
cluster_1	chr10_128267877_128268737	10.5159682785364	3.44123792854694	4.83852760181907	2.56546680578258	0.794927436628316	Intron (ENST00000626518.2/101927381, intron 1 of 3)	LINC01163
cluster_1	chr10_129888921_129889620	13.6462012079259	4.55289091880576	3.59202146743872	4.66723924248412	0.901001329645383	Intron (ENST00000440978.2/253738, intron 6 of 16)	EBF3-AS1
cluster_1	chr10_1309594_1310891	37.4566509112145	3.81682033090406	2.24798530182683	2.84927327142992	0.936071346379302	Intron (ENST00000381312.6/105, intron 3 of 9)	ADARB2
cluster_1	chr10_131890855_131891889	8.80059595826313	2.9590179081414	2.90866223897338	1.86638640584176	0.926882560020647	Exon (ENST00000634373.1/ENST00000634373.1, exon 1 of 2)	PPP2R2D
cluster_1	chr10_132001146_132001958	17.7234554743541	2.39052044487593	2.09743908527045	1.44842684624382	0.944497514918376	Distal Intergenic	BNIP3
cluster_1	chr10_132006912_132007781	14.5317175289664	1.57980505403998	1.72624750582846	0.656701780337492	0.933259513428866	Distal Intergenic	BNIP3
cluster_1	chr10_132037266_132038048	17.8318872209752	4.35109210530324	5.45375357422778	6.71449177956355	0.797367210479907	Promoter (<=1kb)	JAKMIP3
cluster_1	chr10_132163061_132163938	29.2237943682443	4.94631871806117	4.83385384320454	6.23945767949557	0.885482592612907	Promoter (1-2kb)	JAKMIP3
cluster_1	chr10_132335197_132335822	25.2551459209063	9.76332509873323	3.51388872977951	2.40477914720854	0.872469112751684	Promoter (<=1kb)	LRRC27
cluster_1	chr10_132388887_132390036	10.1500612579647	5.76863617708457	4.58902053716079	6.02433054018068	0.802297318185084	Distal Intergenic	PWWP2B
cluster_1	chr10_132407816_132408818	23.101490788352	6.49165640406431	5.63093583700607	8.78229054823751	0.820557277047815	Intron (ENST00000631148.2/170394, intron 2 of 2)	PWWP2B
cluster_1	chr10_132418851_132419782	23.6963756418996	10.1925359792415	6.49177041224339	6.47532725012876	0.941239912875693	Exon (ENST00000428814.1/ENST00000428814.1, exon 1 of 2)	PWWP2B
cluster_1	chr10_132517982_132519468	22.5942087595107	9.98839690384061	9.57733676362159	6.36351424292	0.894702912213037	Promoter (<=1kb)	LOC107984282
cluster_1	chr10_13271364_13271997	14.5344160939071	5.61968075862651	2.08320118073042	3.01416653949985	0.889279115526682	Distal Intergenic	PHYH
cluster_1	chr10_132879026_132879832	9.06295424243993	3.1789187430643	1.94696433804306	2.77228065832932	0.912640773069659	Promoter (2-3kb)	CFAP46
cluster_1	chr10_132971459_132972617	8.98329793745451	2.34439923847392	1.29044112656955	2.4828402410138	0.876401308971598	Exon (ENST00000461291.2/399829, exon 2 of 3)	LINC01168
cluster_1	chr10_133100831_133101640	29.0717842095808	19.5994803193	18.847734439995	9.21952604737099	0.614135937738251	Promoter (<=1kb)	ADGRA1
cluster_1	chr10_133219592_133220318	19.9594017627582	3.76194374365548	2.30792403944913	1.02181711275443	0.977878459134889	3' UTR	KNDC1
cluster_1	chr10_133236852_133238492	13.5593592094769	8.23528234685524	6.24389057114841	3.92944050506444	0.762948528757993	Promoter (<=1kb)	VENTX
cluster_1	chr10_133246933_133247832	15.5871008099274	7.28630645842226	2.68646168915032	2.19943278605343	0.82022634309285	Promoter (<=1kb)	MIR202
cluster_1	chr10_133257381_133258234	16.7108716320374	7.77621294768408	5.32045137942331	5.41833428627848	0.941492592119292	Exon (ENST00000611956.1/ENST00000611956.1, exon 1 of 1)	ADAM8
cluster_1	chr10_133276367_133277412	17.1006196868491	6.98851739602771	5.06039788058588	3.46260326468303	0.925163514868814	Promoter (<=1kb)	ADAM8
cluster_1	chr10_133318469_133319249	22.4350407978389	12.8123683604761	9.36034649761796	6.40195080747819	0.810518245385112	Promoter (<=1kb)	TUBGCP2
cluster_1	chr10_133422779_133423882	11.9989587473629	4.4748803009456	4.8452654283642	4.85850428180919	0.878026093240637	Promoter (<=1kb)	SPRN
cluster_1	chr10_13349487_13350323	45.9571245327112	9.45898229500175	8.08150441850985	7.81967962214863	0.943104060491649	Promoter (1-2kb)	SEPHS1
cluster_1	chr10_13351344_13351816	32.9810684298591	3.30411908945411	2.66016669181998	3.41505714074723	0.916483301383988	Distal Intergenic	SEPHS1
cluster_1	chr10_13690185_13690973	11.5280571643117	5.11215778947619	3.20633784294548	1.11871972466447	0.818657845027455	Intron (ENST00000357447.7/55691, intron 15 of 24)	FRMD4A
cluster_1	chr10_13758938_13759562	13.4346709583501	9.09925694059148	6.300531392658	2.99051030196184	0.651083611285112	Promoter (2-3kb)	FRMD4A
cluster_1	chr10_13808993_13810110	10.4664041107915	4.41486884702123	4.84649976268509	6.20913376225406	0.713046806408104	Intron (ENST00000357447.7/55691, intron 4 of 24)	FRMD4A
cluster_1	chr10_13822728_13823574	18.6817667566358	3.86906335822057	2.74577294327114	2.76776324022773	0.959864013318152	Intron (ENST00000357447.7/55691, intron 3 of 24)	FRMD4A
cluster_1	chr10_13881846_13882876	20.5042193977991	11.4713696117532	6.94145881077325	5.04596328108998	0.802562574019302	Intron (ENST00000357447.7/55691, intron 2 of 24)	FRMD4A
cluster_1	chr10_14185013_14186308	29.3224300084739	18.6314538720748	9.1961774917236	4.17394697887736	0.677411698650048	Intron (ENST00000357447.7/55691, intron 2 of 24)	FRMD4A
cluster_1	chr10_14329625_14331056	6.81481970555927	4.7305483437131	2.45859908013392	1.61350249964519	0.661927446094538	Promoter (<=1kb)	FRMD4A
cluster_1	chr10_16242680_16243590	17.1687359109511	1.91414128489437	1.0813369309568	0.781007183736459	0.957849837277442	Distal Intergenic	LINC02654
cluster_1	chr10_16386647_16387521	15.931890006435	0.962725974266357	0.551843953577048	0.977713735288674	0.918478225027367	Distal Intergenic	PTER
cluster_1	chr10_1754421_1755926	5.80791548661211	4.02849261196684	3.49766945570679	1.62946247395512	0.610888888063663	Distal Intergenic	ADARB2
cluster_1	chr10_19488551_19489439	15.7191726794532	6.40820627042193	4.46608309909262	6.37367693500864	0.871379242354251	Promoter (<=1kb)	MALRD1
cluster_1	chr10_21281967_21282599	33.3585783227213	4.98966583873906	1.69035717927717	1.65577197676379	0.976132027378901	Intron (ENST00000675702.1/10529, intron 1 of 8)	NEBL
cluster_1	chr10_21473119_21473864	19.6445222787102	4.71367005569264	4.25216130219	1.35584487938498	0.924964963899151	Distal Intergenic	MIR1915
cluster_1	chr10_21515975_21517112	16.2219008223997	6.53517880169392	7.71495972657472	8.11276245648592	0.797220912937933	Exon (ENST00000449193.7/387640, exon 4 of 4)	SKIDA1
cluster_1	chr10_21517213_21517904	18.6412924394159	8.21601055933235	11.38310589066	8.73934247045642	0.732188337499294	5' UTR	SKIDA1
cluster_1	chr10_21751307_21752433	18.6753981561409	4.43392275468261	1.87533375119582	1.77442448955207	0.976683639252515	Distal Intergenic	MLLT10
cluster_1	chr10_2201584_2202750	15.0676598301229	3.42916939226089	1.94624537255384	2.74956639325542	0.941953926895495	Distal Intergenic	LINC02662
cluster_1	chr10_22690638_22691577	14.2656881621539	1.58154410468544	0.225626940524847	2.2461819106721	0.871740080689768	Intron (ENST00000376573.9/5305, intron 1 of 9)	PIP4K2A
cluster_1	chr10_23157869_23158784	8.27222109536003	3.26445035780259	4.38812112185119	3.67431706735093	0.781819624992228	Distal Intergenic	PTF1A
cluster_1	chr10_23198827_23199880	12.5015033221843	3.51259233466701	1.33912809303536	2.9397950275943	0.892490629394356	Distal Intergenic	PTF1A
cluster_1	chr10_23280273_23281382	10.0252377736307	1.87278307769358	1.88953325515786	2.28278563986926	0.886911721951533	Intron (ENST00000376501.7/256815, intron 8 of 14)	C10orf67-AS1
cluster_1	chr10_23702818_23703405	16.169419489926	4.59705942623807	3.9523339784914	3.19611863591628	0.968309238657898	Intron (ENST00000376462.5/56243, intron 1 of 18)	KIAA1217
cluster_1	chr10_24552188_24552873	34.2364989027117	2.48481466471003	1.51942826053356	1.98960105644001	0.927858705324771	Distal Intergenic	KIAA1217
cluster_1	chr10_2477012_2477665	20.2374459067721	3.66951828326524	2.86932011941981	0.690038616563947	0.954196049409209	Intron (ENST00000666064.1/ENST00000666064.1, intron 1 of 1)	LOC105376350
cluster_1	chr10_25766282_25767275	23.1224404679266	15.4998645204715	15.6221501732746	2.32855541528826	0.503564878094873	Distal Intergenic	LINC00836
cluster_1	chr10_25933666_25935337	15.7313592830708	12.6484516999975	10.8361106782254	5.62328213666579	0.531226664428762	Promoter (<=1kb)	LOC101929073
cluster_1	chr10_26213965_26214419	29.8829168415716	7.10993270577016	3.42296484762324	1.26673560856947	0.964158625680293	Promoter (2-3kb)	GAD2
cluster_1	chr10_26438004_26439173	7.24971519208383	4.10641283944677	1.9612105991498	1.45400298845595	0.765202131059258	Promoter (<=1kb)	APBB1IP
cluster_1	chr10_26621978_26622800	8.53193841141109	4.02004469746761	2.16050217614809	3.44672659254742	0.832908108025835	Promoter (<=1kb)	LINC03028
cluster_1	chr10_27252158_27253037	18.1807261940965	2.45417364009099	1.67706512451189	1.95437070266111	0.937811249155578	Promoter (<=1kb)	LRRC37A6P
cluster_1	chr10_30359595_30360397	26.6044459800364	9.2831637532669	7.19841327957972	5.26591325521056	0.966100693950893	Intron (ENST00000488290.5/55149, intron 9 of 16)	MIR7162
cluster_1	chr10_30522499_30523307	26.2391830948928	8.1555649743513	3.18397664446474	0.565023611003248	0.900755738674849	Distal Intergenic	LOC105376478
cluster_1	chr10_30552928_30554312	14.5111190957976	8.3738002722121	3.80510273036121	1.64341812670988	0.716988654625602	Exon (ENST00000670247.1/105376478, exon 2 of 2)	LOC105376478
cluster_1	chr10_31036273_31036765	21.8536065967905	3.20767000395422	2.0079144317417	1.93861162881918	0.956506250683625	Intron (ENST00000658872.1/105376481, intron 1 of 2)	LOC105376481
cluster_1	chr10_31754912_31755409	16.740507492169	5.29489188355611	3.94654307619597	7.97851588292573	0.7329337594133	Distal Intergenic	MACORIS
cluster_1	chr10_32139078_32139980	11.8030975090734	3.16397257976878	2.1532315845026	8.2613797157244	0.516644655840062	Distal Intergenic	KIF5B
cluster_1	chr10_32266856_32267471	21.4067002768871	2.34729191658258	1.39483244306451	1.57140445301925	0.942485044075397	Exon (ENST00000628416.1/ENST00000628416.1, exon 2 of 4)	EPC1
cluster_1	chr10_33772254_33773424	10.4378601219883	5.84541472217712	3.85731220401675	2.13019717454801	0.77050463360067	Promoter (<=1kb)	LINC00838
cluster_1	chr10_34426941_34428051	24.9371660104975	13.9787137369437	9.00772774498365	4.34979824705519	0.751740033164996	Promoter (<=1kb)	PARD3
cluster_1	chr10_35593923_35595068	17.2842083422784	1.60660042822367	1.58591464298902	3.33987099081229	0.846574441384658	Distal Intergenic	GJD4
cluster_1	chr10_35639043_35639385	19.6182779697523	6.99839790486267	3.80740198500008	5.14116913077746	0.928928542597897	Promoter (1-2kb)	LOC105376494
cluster_1	chr10_3668344_3669093	16.339928071628	5.47288936376461	3.17233865568204	5.41135929582128	0.871200503281433	Distal Intergenic	LOC105376363
cluster_1	chr10_3887890_3888515	23.0131419109634	8.92806499487366	5.79149896432928	11.0850713796232	0.757874488197605	Distal Intergenic	LINC02660
cluster_1	chr10_42816417_42817291	13.611963108719	0.908697366619581	1.10402266080005	1.16509969472809	0.901935248570158	Exon (ENST00000374518.6/9790, exon 14 of 23)	BMS1
cluster_1	chr10_42932648_42934376	14.6011926368081	9.26557558968474	8.36116750785366	4.99388008988845	0.719126145776238	Distal Intergenic	LINC01264
cluster_1	chr10_42951494_42952727	24.5637502555554	7.67451898764578	5.55504745001243	4.61826282210255	0.984944387763403	Distal Intergenic	LINC01264
cluster_1	chr10_43026091_43027135	16.2035625111409	4.63350995098993	3.80757735224769	3.61677692206933	0.965247657343742	Distal Intergenic	MIR5100
cluster_1	chr10_43202217_43203384	48.4454596400481	13.686001305281	13.2462284020516	9.83405508292014	0.947494715769898	Promoter (<=1kb)	RASGEF1A
cluster_1	chr10_43255767_43256424	14.224600064119	7.35496218715138	4.42908786980972	5.01964114231186	0.880314856654363	Intron (ENST00000395810.6/221002, intron 1 of 12)	RASGEF1A
cluster_1	chr10_43401635_43402058	34.0847993613831	5.26045181863179	3.05187250360895	2.34419045908278	0.970436705701285	Intron (ENST00000357065.8/3185, intron 1 of 3)	HNRNPF
cluster_1	chr10_436247_437588	57.2016459868464	0.863704336206408	0.469550225643163	0.589672399633148	0.918991289849967	Exon (ENST00000425723.2/ENST00000425723.2, exon 1 of 2)	DIP2C
cluster_1	chr10_44316297_44317118	23.430654103445	1.95233039117728	3.2168532760184	2.82636080866471	0.879932039835236	Distal Intergenic	CXCL12
cluster_1	chr10_44370455_44371407	30.9148766792514	1.83988809146656	2.47250934332499	2.22175281007928	0.903786629540026	3' UTR	CXCL12
cluster_1	chr10_44382170_44382857	19.1195072777411	4.56459599962523	5.12427629511096	3.81612901697742	0.916480940214072	Promoter (2-3kb)	CXCL12
cluster_1	chr10_44383914_44385424	13.3481251036756	9.18190225987293	8.89843096814407	4.98452492833836	0.6310786714095	Promoter (<=1kb)	CXCL12
cluster_1	chr10_44932626_44933404	13.7088571114103	6.09071495747731	8.81350355673303	9.43197533653438	0.577344157807485	Promoter (<=1kb)	TMEM72
cluster_1	chr10_44974629_44975849	14.7600553634628	6.96181393333113	8.96808542390214	5.74538355137568	0.742935297589307	Promoter (2-3kb)	RASSF4
cluster_1	chr10_46540983_46541676	19.9922397003729	10.6017184337307	9.97752654809541	3.66377968659652	0.707289354843973	Distal Intergenic	GPRIN2
cluster_1	chr10_46555403_46557753	28.6796113462513	13.4979888580231	11.7009150606003	6.42552711533723	0.842016524268636	Promoter (<=1kb)	GPRIN2
cluster_1	chr10_48671057_48672493	8.46724129521221	3.51108203212213	2.71034013742579	1.89328392881366	0.930279303980919	Exon (ENST00000440750.1/ENST00000440750.1, exon 1 of 2)	WDFY4
cluster_1	chr10_49689906_49690794	16.8000254915133	2.35080362083828	2.0241559518964	1.78305392863089	0.937784046075363	Intron (ENST00000374113.3/282966, intron 1 of 1)	C10orf53
cluster_1	chr10_51083212_51083970	11.4970105663204	2.69317343463347	4.7346797958271	3.20590939232722	0.78093094689568	Intron (ENST00000401604.8/5592, intron 1 of 17)	PRKG1
cluster_1	chr10_51267913_51268873	28.9662305366372	0.486564079946822	1.13070225981516	0.96998510483848	0.9017630637179	Intron (ENST00000401604.8/5592, intron 2 of 17)	MIR605
cluster_1	chr10_52018687_52019630	7.27278101258986	6.17450625881221	3.38622627344364	1.65235743694491	0.529443567885866	Intron (ENST00000401604.8/5592, intron 5 of 17)	PRKG1
cluster_1	chr10_52038962_52039877	22.8713623624461	0.840592316299308	0.601068210271978	0.856922112866311	0.916812125110253	Exon (ENST00000691193.1/ENST00000691193.1, exon 1 of 3)	PRKG1
cluster_1	chr10_52040521_52041128	19.6084769358668	0.66123146591535	0.43939000525849	1.58232269774707	0.888733193714057	Intron (ENST00000401604.8/5592, intron 5 of 17)	PRKG1
cluster_1	chr10_52780030_52780549	15.5185632138387	6.1438725182749	5.15861287160566	8.77183823563382	0.703198377386861	Distal Intergenic	MBL2
cluster_1	chr10_5293880_5294596	19.0675931943123	3.52962491641511	2.77001331199911	1.79373394901993	0.964994491311291	Distal Intergenic	LINC02561
cluster_1	chr10_52965861_52966535	23.1014843488643	3.78337519892864	3.94506730893919	1.92588388863068	0.936007795224639	Distal Intergenic	LINC02672
cluster_1	chr10_5466123_5467110	21.1945493620257	4.52998515085951	2.59642881899248	6.44200771093123	0.822291280280603	Distal Intergenic	NET1
cluster_1	chr10_55601743_55602614	14.0875975918259	5.51605610815199	7.63281002987141	5.87225536446116	0.77240927524916	Intron (ENST00000613346.4/65217, intron 2 of 5)	PCDH15
cluster_1	chr10_57222193_57223068	28.228850126731	4.04551395599994	2.33996138455005	1.87692178689283	0.965800350475474	Exon (ENST00000690550.1/ENST00000690550.1, exon 1 of 3)	MIR3924
cluster_1	chr10_58229732_58230464	11.0274437033528	1.53439891694872	1.74605611458602	1.64519037812896	0.904311133488645	Intron (ENST00000373935.4/253430, intron 2 of 5)	IPMK
cluster_1	chr10_58963544_58964364	37.3789713367727	7.32689527612115	11.2168764656656	24.1888701930344	0.541263211530635	Distal Intergenic	LOC102724768
cluster_1	chr10_59847001_59848171	24.1991356772882	3.11599610723676	1.36980004682674	0.659415148202772	0.975560730144958	Intron (ENST00000263102.7/8030, intron 2 of 8)	CCDC6
cluster_1	chr10_60003310_60004554	22.5735037013851	1.45625140419571	2.49071458510243	1.9427213907663	0.890939280449329	Distal Intergenic	ANK3
cluster_1	chr10_60732791_60733762	24.1092049909759	9.61451364864747	8.875882584843	6.50661499928446	0.941766680590035	Promoter (<=1kb)	NA
cluster_1	chr10_6086345_6086781	19.4021282268027	7.18266112388752	5.83535228938602	7.3370639556724	0.899615896412305	Promoter (2-3kb)	RBM17
cluster_1	chr10_6108524_6109284	25.3350697197752	2.24723002722242	2.51454748169724	2.37641564547792	0.909920848251685	Promoter (<=1kb)	RBM17
cluster_1	chr10_61985963_61987315	7.48860133749151	0.729859900256367	1.41175140078308	2.24824513402739	0.761864826030259	Intron (ENST00000644638.1/84159, intron 3 of 4)	ARID5B
cluster_1	chr10_62924215_62924923	25.4156467280321	4.88523508424389	3.55102951217599	2.80372265705106	0.968370939370649	Distal Intergenic	LOC107984012
cluster_1	chr10_63504050_63504826	9.90162557776984	1.85327970214663	1.41192992528036	2.29590226615858	0.881656336160373	Intron (ENST00000633035.1/221037, intron 1 of 3)	REEP3
cluster_1	chr10_63713042_63714042	31.7830279627658	5.32205265951676	14.0081773253815	9.97973350911322	0.696756241527985	Intron (ENST00000444770.1/ENST00000444770.1, intron 2 of 2)	LOC101929846
cluster_1	chr10_64041133_64041997	8.87624124831657	1.59404302535569	4.16655555433446	3.25691469278145	0.667838556507822	Intron (ENST00000654191.1/ENST00000654191.1, intron 2 of 5)	LOC105378333
cluster_1	chr10_6647723_6648369	12.6841810254974	3.79926242542693	2.41088207631168	2.17398163776362	0.983185527643888	Distal Intergenic	LINC02648
cluster_1	chr10_67230541_67231531	15.1287081851001	7.52831097214159	5.10212329197882	5.92060211075828	0.913509108670805	Intron (ENST00000683963.1/29119, intron 4 of 16)	CTNNA3
cluster_1	chr10_67861442_67862592	26.5927356933733	2.4775228549835	0.711303075234008	2.06157032748012	0.928167609480405	Distal Intergenic	SIRT1
cluster_1	chr10_68208376_68208969	16.2365269783586	4.45479966983036	3.85990405205643	4.43540995296288	0.920308063385099	Intron (ENST00000354393.7/84665, intron 19 of 19)	ATOH7
cluster_1	chr10_68550744_68551279	15.0572866242054	6.30752541097953	2.90208359651566	3.7013218622968	0.893291849630592	Distal Intergenic	TET1
cluster_1	chr10_69222151_69223010	11.9761886901414	5.23711755532454	2.82157874547348	3.07786674005993	0.907244216965074	Promoter (1-2kb)	HKDC1
cluster_1	chr10_69329473_69330303	32.7648053070465	3.86550271253823	1.3909938440943	1.21612209829012	0.967596120583449	Intron (ENST00000436817.6/3098, intron 4 of 20)	HK1
cluster_1	chr10_69389704_69390507	15.4768676447705	3.92920483083801	2.70388666760208	6.86560986877288	0.721489916694424	Promoter (1-2kb)	HK1
cluster_1	chr10_69392228_69392924	17.0732803693146	6.38330558116298	6.90269752283586	7.36631166020894	0.855449104487387	Promoter (<=1kb)	HK1
cluster_1	chr10_69507638_69508268	18.490075178269	7.82319157240611	4.92165115971077	7.43694204841384	0.860282052093085	Promoter (1-2kb)	TSPAN15
cluster_1	chr10_69574502_69575211	24.0077421846005	10.8738768542938	7.91691066467515	6.02507132659965	0.919866555837976	Promoter (<=1kb)	LOC101929021
cluster_1	chr10_69801128_69802228	19.0049995806399	9.02756834965815	6.34843275116161	4.42906073147605	0.883110569855621	Promoter (<=1kb)	COL13A1
cluster_1	chr10_69867536_69868429	26.5184402168246	3.12617224846625	1.89534741352482	1.88801484889832	0.948633254602617	Exon (ENST00000357811.8/1305, exon 3 of 38)	COL13A1
cluster_1	chr10_70264989_70265571	19.0865318398489	3.01790967170435	3.06884023755953	4.60964019204737	0.854723029712179	Intron (ENST00000277942.7/64106, intron 2 of 3)	NPFFR1
cluster_1	chr10_70283361_70284318	15.7260670568802	7.48232657673147	3.21728896298389	2.34569089954551	0.823223589758099	Promoter (<=1kb)	NPFFR1
cluster_1	chr10_70368762_70369574	23.7914352554504	2.35571809534367	1.33564438153468	1.37632050483878	0.944733128471003	Intron (ENST00000395011.5/55222, intron 2 of 3)	LRRC20
cluster_1	chr10_70387265_70387916	22.5531308301021	4.62066967775317	2.22408271859906	4.27473365269375	0.914206416202182	Distal Intergenic	LRRC20
cluster_1	chr10_70440751_70441721	13.68000377337	7.88606219800716	3.7589873520864	3.5595758440387	0.776886318163008	Promoter (<=1kb)	NODAL
cluster_1	chr10_70441876_70442884	22.1409091549553	3.45763831346572	1.15109623951964	2.49091524322517	0.939052431029298	Promoter (<=1kb)	NODAL
cluster_1	chr10_70455188_70455748	30.8586802343645	2.20494890165036	1.55939193465348	1.88057293833597	0.92472264334255	Distal Intergenic	NODAL
cluster_1	chr10_70461395_70461731	20.2366588732199	9.86790413085421	8.35671349956483	4.96058420844445	0.848466325390439	Distal Intergenic	NODAL
cluster_1	chr10_70493610_70494305	11.249010317913	5.50331924924106	3.21294590357692	1.7903853741892	0.820811569051206	Intron (ENST00000263563.7/27143, intron 1 of 19)	PALD1
cluster_1	chr10_70508815_70509438	13.8209874316406	5.47775873541789	5.15975441617326	4.02070417993035	0.949980687202729	Intron (ENST00000263563.7/27143, intron 1 of 19)	PALD1
cluster_1	chr10_70558981_70559744	13.3501548078578	5.44422168675261	2.77750741142862	4.50976363554544	0.868818786588365	Intron (ENST00000263563.7/27143, intron 18 of 19)	PALD1
cluster_1	chr10_70624192_70624992	17.8357258799268	3.19455218588315	0.987467156339617	1.02965485921965	0.978780389768699	Intron (ENST00000697571.1/27143, intron 20 of 20)	PRF1
cluster_1	chr10_70760867_70761634	11.8316978709354	6.43063517851556	4.96115331316989	2.64165936291785	0.78232584256303	3' UTR	TBATA
cluster_1	chr10_71269407_71270691	19.9134353733111	5.75734040204626	3.97602810743753	3.60048451375668	0.985127746872157	Intron (ENST00000335350.10/219699, intron 1 of 16)	SLC29A3
cluster_1	chr10_71278563_71279275	12.6051842031033	4.25502153520148	1.99084704068104	2.84003959332039	0.927203304113465	Intron (ENST00000335350.10/219699, intron 1 of 16)	SLC29A3
cluster_1	chr10_71344207_71345252	23.5692679609403	3.00735769961204	2.67405650277524	1.51340418883652	0.946158470083412	Promoter (2-3kb)	LOC105378353
cluster_1	chr10_71384132_71384700	14.6747225073585	7.33415369190769	5.71711389899558	5.15377317709596	0.949115690292537	Distal Intergenic	CDH23
cluster_1	chr10_71657513_71658710	15.7990740245614	13.0988086161838	7.07335746597193	2.22829126970835	0.523843027013107	Intron (ENST00000224721.12/64072, intron 14 of 69)	CDH23
cluster_1	chr10_71805526_71806490	19.2955689009091	4.18116153045855	3.41249209155132	5.65596793743215	0.851117105160805	3' UTR	CDH23
cluster_1	chr10_72395485_72396075	11.1314676505214	4.29890392238648	2.92293540817473	4.48934910944889	0.853218124203476	Intron (ENST00000476605.7/10367, intron 7 of 9)	DNAJB12
cluster_1	chr10_72886411_72887538	9.74537967313467	4.93090486900373	2.81198089676447	2.72837645115091	0.868403529545823	3' UTR	OIT3
cluster_1	chr10_73591173_73592331	16.4704751847067	14.1916385816019	9.11585974055407	4.3276731552123	0.511903664896746	Promoter (<=1kb)	USP54
cluster_1	chr10_73940523_73941316	13.6724327016157	10.0755376718882	5.3187728290433	4.21157026106423	0.647350236942806	Distal Intergenic	C10orf55
cluster_1	chr10_74207655_74208534	12.6229785359642	2.22104649167193	2.59023605488623	2.92225690479272	0.872249046013251	Intron (ENST00000672429.1/132, intron 2 of 9)	ADK
cluster_1	chr10_74730125_74731106	12.2843949192338	2.31861875743747	0.705614168304934	1.98912675499023	0.912354181019379	Distal Intergenic	KAT6B
cluster_1	chr10_74813209_74814230	9.21838589557509	2.76734442355944	2.38165774000176	0.498673423934524	0.875533770920812	Distal Intergenic	KAT6B
cluster_1	chr10_75043310_75044244	14.3862766237677	1.06980906082794	1.5436011604774	2.14873422574645	0.864160255090581	Exon (ENST00000338487.6/338599, exon 3 of 4)	KAT6B
cluster_1	chr10_75099866_75100923	25.0730398841265	10.5611699901962	6.92898042152475	6.91294695171467	0.951336166484398	Promoter (<=1kb)	SAMD8
cluster_1	chr10_75187756_75188578	15.0260061765111	1.94503805301483	2.18430079052132	1.23108874446464	0.927373373207155	Distal Intergenic	VDAC2
cluster_1	chr10_75520975_75521787	8.56512029615048	6.27245245157257	2.50491258002508	3.73432041355524	0.636387394560414	Intron (ENST00000611255.5/83938, intron 2 of 6)	MIR606
cluster_1	chr10_76082714_76083507	21.3523203825837	3.41759967219368	2.01962773189609	1.49062605324634	0.972472581127079	Intron (ENST00000611255.5/83938, intron 5 of 6)	LRMDA
cluster_1	chr10_76103119_76103764	11.7714993756889	2.66702892350698	1.2948253473287	2.66564036397076	0.894463244136232	Intron (ENST00000611255.5/83938, intron 5 of 6)	LRMDA
cluster_1	chr10_76631906_76633038	9.0364016353991	3.18882883311574	1.9841177301736	3.07569472126602	0.882972531188878	Distal Intergenic	LRMDA
cluster_1	chr10_77564717_77565973	12.8048396963054	6.10899076718383	1.8842047744889	1.14145247758496	0.787703292862335	Intron (ENST00000639601.1/3778, intron 1 of 27)	KCNMA1
cluster_1	chr10_77709920_77710602	20.1416072971863	1.95154469426733	2.27346246704836	2.17929149781715	0.905134672215935	Distal Intergenic	KCNMA1
cluster_1	chr10_77711074_77711857	23.3201700198198	9.97990217805397	9.58934893807154	9.94666277626197	0.920584826396797	Distal Intergenic	KCNMA1
cluster_1	chr10_788986_789847	16.8220429767085	11.0105486006769	5.61230657098385	6.29039215106372	0.736949220378391	Distal Intergenic	LARP4B
cluster_1	chr10_79487346_79488070	17.6780112460948	4.39416367279197	6.68556623507464	5.5398585657999	0.811275120096081	Distal Intergenic	LOC729815
cluster_1	chr10_79502330_79503175	10.3776636092461	6.10440681484926	4.33069803537908	3.84979895053106	0.857519376319895	Distal Intergenic	LOC729815
cluster_1	chr10_80207208_80207694	18.5326042658122	4.79747632320772	3.56477666461312	8.81920287111348	0.697613388873495	Promoter (<=1kb)	LINC00857
cluster_1	chr10_80256592_80257282	15.5515341511061	4.06976393703794	3.45975406973186	4.62438077803413	0.88665795545796	Distal Intergenic	MAT1A
cluster_1	chr10_80265718_80266659	12.5220119880917	4.88824312271637	2.82485783270105	4.72817170857908	0.851950598141298	Distal Intergenic	MAT1A
cluster_1	chr10_80289435_80290212	15.2349318442809	1.77968060866159	2.31824395030133	3.17667862018419	0.849337638452465	Promoter (<=1kb)	MAT1A
cluster_1	chr10_80460708_80461333	17.6028011700502	2.84420167333259	2.68469188722574	8.87357499090752	0.630158544203128	Promoter (1-2kb)	TSPAN14
cluster_1	chr10_80464497_80465670	20.2897711073264	15.8591639313619	12.9941058266599	6.07925516203961	0.544132658091468	Intron (ENST00000481124.5/81619, intron 1 of 5)	TSPAN14
cluster_1	chr10_80535780_80536650	12.8416251798101	0.788264202838645	2.073485942062	0.982208970853219	0.866527174168117	Promoter (<=1kb)	TSPAN14-AS1
cluster_1	chr10_80599297_80599912	12.3952646734726	4.67921071656317	3.03007261349383	4.58764405401365	0.874332534896171	Intron (ENST00000339284.6/387694, intron 4 of 6)	SH2D4B
cluster_1	chr10_8296009_8296874	9.86652719355623	3.9135867427903	2.08155707166074	1.04526747081115	0.876963143260101	Distal Intergenic	LINC00708
cluster_1	chr10_84279793_84280665	10.4239082169528	3.95252018301757	5.80867456510687	2.29045055063827	0.696423265953658	Promoter (<=1kb)	LINC00858
cluster_1	chr10_84540508_84541081	10.7049389417623	5.7119610354578	3.44176181118315	6.11313691450782	0.712967584121838	Distal Intergenic	CCSER2
cluster_1	chr10_85492534_85493350	22.7387341333624	4.09822882692956	1.82098750272781	2.25098805707447	0.966597735752657	Distal Intergenic	LINC01520
cluster_1	chr10_86261876_86262859	9.97603068689728	3.30257398003754	2.2775664502325	2.00578812704505	0.982999481756902	Promoter (1-2kb)	MIR346
cluster_1	chr10_86376843_86377657	15.7781245224171	6.7163674078347	5.64672726376516	5.67940309422567	0.974587160703115	Distal Intergenic	GRID1
cluster_1	chr10_86389376_86390287	22.150657333891	7.98123345949337	5.91695835279262	3.27359088424535	0.922711393793724	Distal Intergenic	GRID1
cluster_1	chr10_86535252_86535970	18.0589842542168	5.40650996500211	3.32087973579252	3.04338220389561	0.981251193445289	Distal Intergenic	WAPL
cluster_1	chr10_86536176_86537069	13.6345940853059	3.30460100380966	3.52771100373085	0.888017385088719	0.886677321965721	Distal Intergenic	WAPL
cluster_1	chr10_86631779_86632764	22.0067028383279	8.46229316053101	7.13592600630117	3.32256386285656	0.878694539012215	Distal Intergenic	LDB3
cluster_1	chr10_86688270_86688725	17.7996105489448	7.53026529586266	6.1439341559994	7.62035582477256	0.894147141708916	Promoter (<=1kb)	LDB3
cluster_1	chr10_86856996_86857822	18.5598106678024	1.83642479629908	3.77565425229121	2.3219876791885	0.858252435343227	Intron (ENST00000638429.1/657, intron 2 of 13)	BMPR1A
cluster_1	chr10_86864922_86865636	17.4948197080651	2.13800760874678	3.03103806256711	0.869800419890318	0.905357562955483	Intron (ENST00000638429.1/657, intron 2 of 13)	BMPR1A
cluster_1	chr10_86945356_86946421	9.97871423902729	5.30408414201942	3.6859700354058	2.85826435716648	0.862229830044494	Promoter (<=1kb)	MMRN2
cluster_1	chr10_86954053_86954968	24.6547549581132	17.999997189479	9.96771912486467	4.97997529241551	0.614755159270913	Promoter (<=1kb)	MMRN2
cluster_1	chr10_86960323_86960747	16.7748630390537	9.07781895240285	4.7187208537098	5.6316858725733	0.831121528645487	Promoter (<=1kb)	SNCG
cluster_1	chr10_87625662_87626846	13.7293394829299	1.14464010110623	0.921819290539194	1.22246836723275	0.914733857683196	Intron (ENST00000438082.1/ENST00000438082.1, intron 1 of 3)	PAPSS2
cluster_1	chr10_87915269_87915902	16.0160657870657	8.33669231436062	3.87648851802338	5.94172237413095	0.809892095794187	Intron (ENST00000688308.1/5728, intron 3 of 9)	PTEN
cluster_1	chr10_88702977_88703751	23.5525066620842	1.21851686512124	1.10395068959892	2.31283155615569	0.888214310339177	Promoter (2-3kb)	LIPK
cluster_1	chr10_88728275_88728935	24.9456022272136	3.02090252243432	1.62861488745819	1.15545444209953	0.963193616219202	Exon (ENST00000441370.1/ENST00000441370.1, exon 1 of 1)	LIPK
cluster_1	chr10_89260202_89260960	13.1146649104285	5.49574909404111	7.26592860037647	7.47951187991859	0.708845212642214	Intron (ENST00000371837.5/3988, intron 2 of 8)	LIPA
cluster_1	chr10_90812676_90813485	18.9699899448746	0.755575538466418	0.57668286944989	0.489171682933941	0.924216296934835	Exon (ENST00000685016.1/ENST00000685016.1, exon 3 of 3)	HTR7
cluster_1	chr10_90925338_90926088	27.0335705197819	1.2920309644816	0.340317289535034	0.819152724864339	0.929901047436306	Distal Intergenic	ANKRD1
cluster_1	chr10_91551761_91552344	14.7448797155414	4.2037983975222	3.25062453994802	4.93283034239944	0.863880471366847	Intron (ENST00000688440.1/100188947, intron 1 of 3)	HECTD2-AS1
cluster_1	chr10_91744968_91745692	18.3849339108191	1.442900114368	1.0597895274469	2.44544797970124	0.881697176158689	Distal Intergenic	TNKS2-DT
cluster_1	chr10_92045450_92046298	16.58198694125	5.10598346760803	2.5790173916172	1.67450576150976	0.948441721566557	Distal Intergenic	BTAF1
cluster_1	chr10_92305078_92306055	14.8471938158074	1.77217440228972	0.786644994888034	0.961091173025066	0.953872371376974	Promoter (2-3kb)	MARCHF5
cluster_1	chr10_92387108_92387729	15.3880335717012	5.60093072902604	5.3017023286368	1.80919502332593	0.841702708942425	Distal Intergenic	MARCHF5
cluster_1	chr10_92691448_92692531	16.3886121990008	5.10445391557775	3.5555041327151	1.81067980637112	0.941518886775297	Promoter (<=1kb)	HHEX
cluster_1	chr10_92842915_92843510	7.85670189134885	4.66027620248963	2.8885850104652	4.89322092730894	0.681523417848583	Intron (ENST00000671701.1/54536, intron 2 of 22)	EXOC6
cluster_1	chr10_93272704_93273703	32.3166840111146	3.30951506129901	1.18355506720923	1.61093830084635	0.952138503828654	Distal Intergenic	MYOF
cluster_1	chr10_93280114_93281685	28.7265968352944	7.11521371579323	6.57881831412948	3.34655396353463	0.941912617640631	Distal Intergenic	MYOF
cluster_1	chr10_93438479_93439320	16.8014953283537	6.20293271324611	5.66650628571356	8.18789941147367	0.783227737894191	Intron (ENST00000359263.9/26509, intron 3 of 53)	MYOF
cluster_1	chr10_93554735_93555439	9.98051394751555	4.10773654123663	3.84436422898208	3.90345724026406	0.939108326929088	Distal Intergenic	FFAR4
cluster_1	chr10_93841767_93842649	20.5149351904763	3.78401414648688	3.52627028903649	2.1498268147525	0.94894801381983	Distal Intergenic	LGI1
cluster_1	chr10_95229842_95231699	27.5433339065633	5.54695408630684	4.83469977449133	5.61811931991686	0.917431550860506	Exon (ENST00000451737.1/ENST00000451737.1, exon 1 of 2)	PDLIM1
cluster_1	chr10_95264308_95265039	24.0560947016104	3.03596315679829	2.17469800160465	2.39872695269042	0.936506749446186	Intron (ENST00000329399.7/9124, intron 3 of 6)	PDLIM1
cluster_1	chr10_95430351_95430932	8.53574262627721	4.40632502333203	2.34276927411622	4.99642725797349	0.667040030859577	Intron (ENST00000371227.8/10580, intron 6 of 31)	SORBS1
cluster_1	chr10_95476282_95477348	6.99081386780609	1.69300611380981	2.3501503332257	2.6901465280682	0.781528887420737	Intron (ENST00000371227.8/10580, intron 2 of 31)	SORBS1
cluster_1	chr10_95601042_95601650	13.3403054758913	6.79876921383561	5.39447103708595	10.687405889678	0.506542368092935	Distal Intergenic	ALDH18A1
cluster_1	chr10_95755431_95756652	8.00606520008166	6.17380502589684	2.5575476908396	1.41725295580066	0.584540361595893	Promoter (<=1kb)	ENTPD1
cluster_1	chr10_96309653_96310465	32.3413950650598	4.90351233498373	2.08794553685455	2.26394827151463	0.968720853726259	Intron (ENST00000630152.1/1791, intron 1 of 10)	DNTT
cluster_1	chr10_96341096_96341785	10.5313830233338	7.11012923107231	2.6867598844533	1.64789235360542	0.650636837150455	Distal Intergenic	OPALIN
cluster_1	chr10_96395804_96396651	7.93505093094656	2.25977845340836	4.64103545006803	4.86924501959399	0.548703507130472	Exon (ENST00000357947.4/7093, exon 12 of 21)	OPALIN
cluster_1	chr10_96509029_96509591	24.9789622593727	4.65004211535692	4.9704620864764	3.55386633479816	0.928465978375775	Intron (ENST00000357947.4/7093, intron 1 of 20)	TLL2
cluster_1	chr10_96984518_96985186	7.73236061693266	2.73707431595788	4.64921209270677	1.44672715360305	0.637565833970368	3' UTR	LCOR
cluster_1	chr10_97037262_97038259	14.9896240153578	4.20779482932358	2.27352304972578	4.91043675486948	0.836295848054225	Exon (ENST00000266058.9/6585, exon 22 of 37)	NA
cluster_1	chr10_97195905_97196979	15.3657830359182	7.80011882939173	5.83393892037414	5.16737332375097	0.928290762527804	Promoter (<=1kb)	LOC112268065
cluster_1	chr10_97336945_97338262	34.4119648136395	14.477177361074	10.8423433672297	6.52081653949234	0.897839332535319	Promoter (2-3kb)	FRAT2
cluster_1	chr10_97407125_97407863	28.3289659954328	12.8088029825681	10.685493198404	10.7314185960423	0.978143503266891	Intron (ENST00000422848.1/ENST00000422848.1, intron 1 of 1)	RRP12
cluster_1	chr10_97418718_97419458	17.0656952436567	4.62547503818716	0.956857124374632	1.55077502548591	0.932181025716389	Exon (ENST00000422848.1/ENST00000422848.1, exon 2 of 2)	LOC644215
cluster_1	chr10_97427492_97428056	22.318787788657	10.2232233964469	6.78678470099497	5.52732754421407	0.91244820414579	Promoter (<=1kb)	PGAM1
cluster_1	chr10_97479831_97480476	37.146710260894	2.70817560242011	1.47027947703674	1.49083921745974	0.938443945529104	Exon (ENST00000422685.5/64210, exon 4 of 10)	MMS19
cluster_1	chr10_97572104_97572884	16.1908167966352	7.23497448740961	3.36817794837678	2.90366385091277	0.865559325469654	Promoter (<=1kb)	ANKRD2
cluster_1	chr10_97771200_97772415	14.4708647561441	7.36497193519432	5.5956631913647	9.18021082672186	0.682624650702861	Promoter (<=1kb)	SFRP5
cluster_1	chr10_98062156_98063233	6.2408444049207	3.15759668028504	2.86023955159715	0.9588761878903	0.726731197506205	Distal Intergenic	CRTAC1
cluster_1	chr10_98321007_98321679	9.4950949220595	3.1811708239676	1.68452687818229	2.09261406143655	0.946780357301873	Distal Intergenic	LOXL4
cluster_1	chr10_9911327_9912132	18.4058687633324	1.13401402596059	0.259260714064098	0.461222558347072	0.941632284448126	Distal Intergenic	LINC02663
cluster_1	chr10_99232063_99233023	16.0535303652791	6.67446729599143	5.43599656568506	3.40825286985371	0.909448005319383	Promoter (2-3kb)	HPSE2
cluster_1	chr10_99236003_99236653	20.1627298878059	5.9951247948646	5.9304860131516	1.00850837102533	0.845348981713768	Promoter (<=1kb)	HPSE2
cluster_1	chr10_99392508_99393507	9.36125332765606	2.51990721242837	2.08443237895957	3.31009937254221	0.835240806027366	3' UTR	GOT1
cluster_1	chr10_99522832_99523363	17.254124992959	7.33790355353711	3.39150049567638	3.17724798078203	0.884807276585574	Distal Intergenic	LINC01475
cluster_1	chr10_99913534_99914625	30.9652997867373	22.4699323993805	17.371793160963	6.91753600000704	0.580949632074887	Promoter (<=1kb)	DNMBP
cluster_1	chr11_100753058_100753989	14.3041221113736	5.19483203819699	3.95208854504454	5.55667671940054	0.871331136379684	Intron (ENST00000298815.13/143872, intron 1 of 23)	ARHGAP42
cluster_1	chr11_101516545_101517249	10.0539808230426	3.35118111427256	2.38692563479509	1.52642705533399	0.953451807966265	Promoter (2-3kb)	MIR3920
cluster_1	chr11_102268251_102269431	24.0158753376499	5.60919754121037	9.32801644874664	8.76547461454149	0.764320678188889	Distal Intergenic	YAP1
cluster_1	chr11_102390643_102391254	14.4756160979117	5.41908142933109	4.84293949281222	5.21686954338583	0.932232682285237	Distal Intergenic	BIRC2
cluster_1	chr11_102612853_102613820	20.2892371429899	3.6802155273823	4.78291546870673	1.53281516090736	0.89231774943313	Intron (ENST00000542119.1/101928477, intron 1 of 3)	MMP20
cluster_1	chr11_102807634_102808414	14.9686090011449	1.44435204866889	0.621028527961408	0.981494693339512	0.939272402876135	Exon (ENST00000546014.1/ENST00000546014.1, exon 1 of 1)	MMP1
cluster_1	chr11_103325707_103326778	14.1227909667193	4.48146801188568	4.49111078330856	3.51005205558807	0.940151702755818	Intron (ENST00000375735.7/79659, intron 82 of 88)	DYNC2H1
cluster_1	chr11_10351578_10352972	56.5133427877499	14.3274235393843	23.319016678494	6.17556502308204	0.764691449816284	Intron (ENST00000527261.5/100130460, intron 2 of 2)	CAND1.11
cluster_1	chr11_10366365_10367187	17.3172187313207	4.00202316304323	2.18334178329493	2.96900347251916	0.950459330585221	Intron (ENST00000527261.5/100130460, intron 2 of 2)	CAND1.11
cluster_1	chr11_104163395_104164629	29.6361014524756	12.2329821714151	14.8822479863395	11.6386817516739	0.841826945554268	Promoter (<=1kb)	PDGFD
cluster_1	chr11_10450189_10451456	20.1233706867945	8.88232684994482	7.50854816234693	10.1877163153757	0.81934046358235	Promoter (<=1kb)	AMPD3
cluster_1	chr11_104968984_104969834	10.6775612972919	3.26014498960763	2.15241595925336	2.39070893405931	0.967043974941818	Promoter (<=1kb)	CASP4
cluster_1	chr11_105960016_105960988	19.5729597597622	3.43999516755338	1.68595733017584	1.28627746516035	0.981905711790559	Intron (ENST00000282499.10/2893, intron 14 of 16)	GRIA4
cluster_1	chr11_106956869_106957695	13.3711264019352	3.34668953907822	1.79105448824394	1.12735072901089	0.976865579739507	Intron (ENST00000526355.7/2977, intron 3 of 7)	GUCY1A2
cluster_1	chr11_107858060_107859839	23.3473028547271	9.43288360211555	8.3968518517373	15.4268486772276	0.608656929136708	Promoter (<=1kb)	SLC35F2
cluster_1	chr11_107999740_108000411	13.744202820894	3.38970269288732	1.84296328793668	3.40450601957345	0.893884461357445	Distal Intergenic	CUL5
cluster_1	chr11_108788477_108789219	12.9722468131194	2.35580752726124	0.920778331730466	0.769102219829219	0.983287955150622	Intron (ENST00000690021.1/1662, intron 14 of 18)	DDX10
cluster_1	chr11_109421918_109422642	20.5836045525237	8.33827940574614	8.70053412116655	4.88835760522912	0.859078090705186	Promoter (<=1kb)	C11orf87
cluster_1	chr11_110208826_110209744	11.7092212225587	4.00075910391859	3.15834260500645	2.84130280659255	0.984620682314324	Intron (ENST00000645527.1/5962, intron 14 of 18)	RDX
cluster_1	chr11_110564617_110565776	10.2645548357473	3.97979825277378	2.59048372594083	1.54421510209885	0.9110024969869	Distal Intergenic	ARHGAP20
cluster_1	chr11_111422871_111423502	13.9748536689822	3.82319651593253	3.42382025658256	5.61399493153688	0.793483386527816	Intron (ENST00000531398.1/5450, intron 1 of 4)	LOC100132078
cluster_1	chr11_111454540_111455557	12.3019832400534	3.87008760458242	4.29552635490215	6.20684250505094	0.726717535902888	Promoter (<=1kb)	BTG4
cluster_1	chr11_111512303_111513340	11.6271564148893	4.98238390139918	4.52998961148085	3.75699685648363	0.963451433482648	Promoter (<=1kb)	MIR34B
cluster_1	chr11_111918572_111919353	14.4429804147249	2.42485811248169	1.38431228611829	4.48175908533143	0.787701045090784	Promoter (<=1kb)	C11orf52
cluster_1	chr11_112822268_112823382	17.4115649404389	3.03149202852893	4.56363502003598	1.45228979488964	0.866987359643025	Exon (ENST00000669768.1/105369498, exon 3 of 3)	LOC105369498
cluster_1	chr11_112877422_112878568	8.66320012481895	4.88702345659357	3.32899571513147	1.48416833573483	0.739760044289993	Distal Intergenic	LOC105369498
cluster_1	chr11_112922338_112923222	8.53299071123798	4.31446138814283	3.17609834620309	0.736919788348665	0.729473917581204	Distal Intergenic	NCAM1
cluster_1	chr11_113628694_113629556	30.1279119336604	5.72239999270641	6.26994649224001	5.55614361717574	0.912052327085149	Distal Intergenic	TMPRSS5
cluster_1	chr11_113849539_113850498	30.001628851048	0.339962039969111	0.133294708433269	1.08498855916616	0.902847877107531	Intron (ENST00000003302.8/57646, intron 3 of 24)	USP28
cluster_1	chr11_113895946_113897062	7.7180137478993	3.59168609413445	4.39762534153229	2.9116353844987	0.785956609535325	Distal Intergenic	HTR3B
cluster_1	chr11_113974768_113975732	19.4229588962933	7.93910926200135	5.2383092490785	8.68422107472589	0.812962471735968	Promoter (<=1kb)	HTR3A
cluster_1	chr11_115527684_115528616	11.0733365034888	1.45655530416651	1.85509397906848	1.38120755154019	0.905200321657741	Distal Intergenic	CADM1
cluster_1	chr11_115989646_115990515	8.65725753252697	2.12321905887312	2.48514482959554	3.41517372675225	0.784109041329984	Distal Intergenic	LINC02703
cluster_1	chr11_116579837_116581442	18.0450352707356	7.09861961748368	7.47850334757045	5.15729670531918	0.900764210553771	Distal Intergenic	LINC02702
cluster_1	chr11_116687366_116689084	16.8601511050604	6.31490936515124	3.17092604842702	3.80110430183164	0.929628924637683	Distal Intergenic	LINC02702
cluster_1	chr11_116696282_116697177	13.0675033398675	5.59540740613175	3.15600280311316	3.78506377122877	0.916180537380646	Distal Intergenic	LINC02702
cluster_1	chr11_116732047_116733165	18.1025906473912	7.7010669519831	6.27161069826073	4.11859016054461	0.913427406586303	Distal Intergenic	BUD13
cluster_1	chr11_116791152_116791738	17.1639196832085	11.2781692832901	7.30970597262284	2.82284690130018	0.649208268385008	Promoter (<=1kb)	APOA5
cluster_1	chr11_117181250_117181622	30.4581950622746	7.72364636654005	4.71363713524767	6.9430279031069	0.924783716666463	Promoter (<=1kb)	SIDT2
cluster_1	chr11_117197639_117198369	17.9525580553489	6.8104328216696	4.83055615773093	5.89935853366837	0.935801204670204	Promoter (1-2kb)	TAGLN
cluster_1	chr11_117717760_117718429	10.2890294686052	4.2129338664814	3.1619947674382	5.03872033662412	0.787739973177424	Intron (ENST00000651296.2/57453, intron 3 of 32)	DSCAML1
cluster_1	chr11_117861089_117861971	22.3976996580316	10.4911759704096	7.31046097869055	7.88702627290603	0.94201585667114	Intron (ENST00000532984.1/100533181, intron 1 of 9)	FXYD6
cluster_1	chr11_118171295_118172052	14.6350368688738	9.55955684179911	6.74434566407719	4.59643215222712	0.734364153834954	Promoter (<=1kb)	SCN2B
cluster_1	chr11_118210707_118211512	14.04831947775	3.0268711139887	2.03825746464148	1.74918405417583	0.976316187979825	Promoter (<=1kb)	JAML
cluster_1	chr11_118610904_118611363	30.1396437138334	14.3281826009367	8.62628963617442	13.9000823282865	0.810156626973618	Promoter (<=1kb)	PHLDB1
cluster_1	chr11_118615248_118615736	32.7471604357721	14.184361231446	15.8650084569092	7.51056678983815	0.785201517703959	Promoter (<=1kb)	PHLDB1
cluster_1	chr11_118634278_118636001	29.155985056166	14.209600540746	13.8402620796386	13.6798750295497	0.936609966492635	Promoter (<=1kb)	PHLDB1
cluster_1	chr11_118659167_118660147	27.0021529689206	13.4270975451381	11.5137390594077	13.2116611961113	0.909167632845457	3' UTR	PHLDB1
cluster_1	chr11_118715613_118716297	26.9629076086655	6.59420550053583	2.76173695106538	3.03590524836361	0.971405661177546	Intron (ENST00000526274.2/105369519, intron 2 of 2)	LOC105369519
cluster_1	chr11_118911734_118912769	45.7226283377779	20.8300265062224	11.3724650103342	18.0849462385061	0.842235315154016	Promoter (<=1kb)	BCL9L
cluster_1	chr11_118930052_118930631	33.451117211569	15.6083583666372	10.5034207576528	10.8970413660744	0.936934880625153	Intron (ENST00000534788.1/7379, intron 1 of 5)	BCL9L
cluster_1	chr11_119168538_119169761	27.2659572225549	15.4699693983527	11.5184758968014	14.7801984031134	0.840052190677528	Promoter (<=1kb)	NLRX1
cluster_1	chr11_119195601_119196136	21.8491395234587	2.85132856158621	2.30484512586756	4.32059893604509	0.868689119557568	Promoter (<=1kb)	CCDC153
cluster_1	chr11_119416663_119417703	16.9058055521301	1.71550143240193	1.08967299933502	4.04542750942794	0.81066432639558	3' UTR	THY1
cluster_1	chr11_119421712_119423757	17.603679433033	8.86709351616724	5.84330622180397	6.30007966299771	0.912092704403916	Promoter (<=1kb)	THY1
cluster_1	chr11_11966641_11967367	11.8739562971954	6.71511988264004	5.27594875576232	5.39194823063302	0.939830369381926	Promoter (1-2kb)	DKK3
cluster_1	chr11_119726403_119726954	20.828016845318	8.60138061467177	7.71233791979985	4.49236979915458	0.890437983667545	Promoter (1-2kb)	NECTIN1
cluster_1	chr11_119964279_119965343	13.726629582316	5.41223779781423	3.10183643075263	1.17157957755602	0.862888213812662	Distal Intergenic	LINC02744
cluster_1	chr11_120013203_120013916	19.2322317605475	9.53011565530244	5.12100139200266	4.08803527797618	0.844689036471548	Exon (ENST00000667462.1/ENST00000667462.1, exon 1 of 4)	LOC105369527
cluster_1	chr11_120057584_120058636	23.7634863086896	9.25682722978654	5.59396961453931	2.93447523831619	0.892530293753037	Distal Intergenic	LOC105369527
cluster_1	chr11_120254897_120255980	17.5144114227176	6.55135058382154	4.88235793672037	2.32701447917874	0.896387889853599	Exon (ENST00000558822.5/649133, exon 5 of 8)	LOC649133
cluster_1	chr11_1202906_1203557	17.0498304841664	8.23362715251043	7.63961652199918	6.6374897119545	0.964240522659646	Distal Intergenic	MUC5B
cluster_1	chr11_120316834_120317548	11.2188430366907	2.01942646732899	1.95087577551388	6.40316780761775	0.587444689076921	Promoter (<=1kb)	POU2F3
cluster_1	chr11_120403792_120405031	4.48578907399556	2.65554880492963	1.29578009273489	1.66315712206685	0.7790982166633	Promoter (<=1kb)	ARHGEF12
cluster_1	chr11_120527048_120527960	31.4057528419987	6.2272346438157	4.24189120338735	8.49338644553502	0.851135882710074	Intron (ENST00000638419.1/2900, intron 1 of 20)	GRIK4
cluster_1	chr11_120555024_120555796	9.45193552483163	4.29691917130734	3.50340158242434	5.00438874727592	0.793321521387369	Intron (ENST00000638419.1/2900, intron 1 of 20)	GRIK4
cluster_1	chr11_120645517_120646182	20.5656823858934	7.12961435093017	5.82026171322462	3.0319276430478	0.919132696931174	Intron (ENST00000638419.1/2900, intron 1 of 20)	LOC107984400
cluster_1	chr11_121245991_121246934	8.01000468642104	2.76634700749058	1.81057808202769	1.16626031022301	0.944845159993647	Distal Intergenic	SC5D
cluster_1	chr11_121372545_121373508	12.640648984132	2.20377846946456	0.866501071995465	1.35176195903772	0.955568816571466	Distal Intergenic	SC5D
cluster_1	chr11_121406127_121406955	31.2558426931808	1.5893189133638	0.617439807872975	1.02126330076178	0.929960919955583	Distal Intergenic	SORL1
cluster_1	chr11_121479043_121480202	16.7292751313802	4.23447740246894	2.26562515502527	3.08112915396251	0.950830996785211	Intron (ENST00000260197.12/6653, intron 3 of 47)	SORL1-AS1
cluster_1	chr11_122215102_122215838	12.6199483418781	9.71614299783166	4.53748166172014	7.13608697396203	0.604833387135087	Intron (ENST00000660311.1/399959, intron 2 of 4)	MIR100HG
cluster_1	chr11_122580109_122581428	10.4100706650952	4.74109273834695	6.29273408143501	6.49801402690056	0.668801252819102	Distal Intergenic	MIR100HG
cluster_1	chr11_123165967_123166684	14.8446212774881	4.79002262160679	0.855369683605409	2.11066798568885	0.888090535352695	Intron (ENST00000448775.4/79827, intron 1 of 6)	CLMP
cluster_1	chr11_123194304_123196582	17.5029559321035	9.4881009769434	6.69527546923253	8.97532938886376	0.835967381236266	Promoter (<=1kb)	CLMP
cluster_1	chr11_123505594_123506443	13.1231921507148	9.55072413667021	8.9602999500807	3.76534581973384	0.545349516249969	Intron (ENST00000638157.1/57476, intron 2 of 20)	GRAMD1B
cluster_1	chr11_123580504_123581030	16.6372969542222	9.31026950450563	8.96659480200553	5.02427017487152	0.757793424625668	Intron (ENST00000638157.1/57476, intron 3 of 20)	GRAMD1B
cluster_1	chr11_123640800_123641484	14.350794560819	3.66037168014548	5.68783877227171	4.63355400349807	0.800348699380689	Promoter (<=1kb)	SCN3B
cluster_1	chr11_123742316_123743099	17.1311781726147	2.41722785725582	3.26100982725195	1.5058678540066	0.906212240091537	Promoter (<=1kb)	ZNF202
cluster_1	chr11_123775113_123776387	14.8402512887992	0.832258979410897	1.70439989457848	5.64115128820427	0.679760396325491	Distal Intergenic	OR6X1
cluster_1	chr11_124069317_124070025	12.0525062912503	3.92315951456182	4.88781459779448	5.86714657559356	0.749835619692495	Distal Intergenic	OR10G7
cluster_1	chr11_124481384_124482273	9.86516714928946	4.19845131485621	3.97212835900427	3.9289393104484	0.944616343748956	Exon (ENST00000642028.1/ENST00000642028.1, exon 2 of 2)	OR8B8
cluster_1	chr11_124724922_124725959	4.99325469564303	3.00999168682989	1.42283963916444	1.38499895827763	0.756541225722558	Distal Intergenic	NRGN
cluster_1	chr11_124745660_124747286	18.770954433588	9.0936905899243	7.61226915410521	5.63985079672834	0.911812635571994	3' UTR	VSIG2
cluster_1	chr11_124758200_124758928	25.5534856893209	12.520198534878	9.97624262635234	7.58351578070954	0.911064539665329	Promoter (<=1kb)	ESAM-AS1
cluster_1	chr11_125433219_125433994	15.6527224022759	5.85181589420873	7.61265365531609	10.1277884982616	0.613479094861258	3' UTR	FEZ1
cluster_1	chr11_125441677_125442255	8.5505272459283	2.8375221158668	2.25774468753067	2.30921447671116	0.967108494390527	Distal Intergenic	FEZ1
cluster_1	chr11_125941379_125942383	14.4789455982504	4.79241366124338	4.04089364099397	4.82940044635434	0.913681671438248	Intron (ENST00000637851.1/29118, intron 8 of 8)	VSIG10L2
cluster_1	chr11_12598809_12599983	5.22834202074624	2.52408192525771	1.11486537417801	2.04594085586008	0.798869546912196	Distal Intergenic	LOC105376556
cluster_1	chr11_126159579_126160697	19.4182655516634	10.0040586788642	9.55574787431469	3.13148027169859	0.703641298008836	Distal Intergenic	LOC105369591
cluster_1	chr11_126336354_126337110	9.29393056550374	3.1387623374543	1.59750470729377	4.04958306803882	0.751222614950354	Promoter (<=1kb)	DCPS
cluster_1	chr11_126440645_126441775	10.3794139191658	4.4078810151182	5.15743693212932	5.65278773907075	0.768602980439154	Promoter (<=1kb)	KIRREL3
cluster_1	chr11_12680299_12681231	28.4833135334266	16.8134811901089	16.2742122682798	6.8028193349791	0.663517513340513	Intron (ENST00000527636.7/7003, intron 2 of 12)	TEAD1
cluster_1	chr11_12687594_12688350	19.1500591935597	2.94701229180703	1.86444777674056	2.54782344055588	0.933393344915357	Intron (ENST00000527636.7/7003, intron 2 of 12)	TEAD1
cluster_1	chr11_126890410_126891086	12.6152634458299	3.15361157931343	2.28700865463094	3.739509244081	0.868959543694879	Intron (ENST00000525144.7/84623, intron 1 of 16)	LOC105369559
cluster_1	chr11_126977935_126979342	8.88306243705003	2.14574676466031	0.517047339519263	1.0397601188459	0.941525828131993	Intron (ENST00000525144.7/84623, intron 1 of 16)	MIR3167
cluster_1	chr11_126989993_126990850	16.3504082984785	7.70986092770491	7.50039999466686	6.33957265997724	0.946447477993305	Promoter (1-2kb)	MIR3167
cluster_1	chr11_12724261_12725168	26.7977345958768	4.80868371880002	2.86431534675179	5.08026564842984	0.905599151227499	Intron (ENST00000527636.7/7003, intron 2 of 12)	TEAD1
cluster_1	chr11_127363000_127364013	9.45393997877913	6.32017670799895	1.63638548598677	2.18236088219973	0.654805329221398	Distal Intergenic	LINC02712
cluster_1	chr11_128532237_128533300	15.9581334533956	11.8629319431398	9.8297248430341	3.12829228494313	0.534644584498128	Intron (ENST00000392668.8/2113, intron 3 of 9)	ETS1-AS1
cluster_1	chr11_128548388_128549949	10.5158167215344	6.41499018273825	4.19237919713238	5.85903552959651	0.774352620949839	Intron (ENST00000392668.8/2113, intron 3 of 9)	ETS1-AS1
cluster_1	chr11_128582614_128583370	20.2409835988658	4.42913824998159	2.10989305306955	6.86205734291489	0.783505198877163	Intron (ENST00000392668.8/2113, intron 1 of 9)	ETS1
cluster_1	chr11_128686026_128686717	17.0551827827081	4.04105069585606	2.89978242917769	1.5518897394775	0.970491393267941	Promoter (<=1kb)	LOC101929538
cluster_1	chr11_128733394_128734406	21.8748555334374	8.18780665482107	5.09848083890664	2.06879928232064	0.883473261882964	Intron (ENST00000608303.5/2313, intron 1 of 6)	FLI1
cluster_1	chr11_128784138_128784921	20.2251709135674	2.38801668434897	1.82395261357675	1.12063575321757	0.951248470714824	Intron (ENST00000608303.5/2313, intron 3 of 6)	FLI1
cluster_1	chr11_128859605_128860273	13.4378543124941	5.03030506180276	3.89552441678543	3.80762125036779	0.982296744920053	Intron (ENST00000392665.6/3758, intron 1 of 1)	KCNJ1
cluster_1	chr11_128870841_128871821	16.5584257220263	2.78656510778855	4.83195860785498	2.70579786081018	0.843733530848238	Distal Intergenic	KCNJ1
cluster_1	chr11_12913819_12915023	22.6715010499464	6.70029114437215	8.13164669386148	5.25241675860172	0.882664580472306	Intron (ENST00000527636.7/7003, intron 10 of 12)	TEAD1
cluster_1	chr11_129315707_129316490	11.6343700794837	4.62801948116837	3.67134651241117	1.64497386093809	0.869556972030341	Distal Intergenic	ARHGAP32
cluster_1	chr11_129364002_129364634	18.2108183354612	8.3636344884196	7.97153363008511	8.98826871236336	0.877534860511474	Distal Intergenic	BARX2
cluster_1	chr11_129695388_129696505	15.5522951432261	9.06797480807803	9.02464642518699	5.59245120939359	0.76072085997992	Distal Intergenic	LINC01395
cluster_1	chr11_129750319_129751245	14.0981879806056	5.07978366253611	5.71265747286926	5.37185336287801	0.879167674173013	Distal Intergenic	TMEM45B
cluster_1	chr11_13008591_13010782	22.9052514395828	15.5830290466655	12.7455445208643	7.75163209459844	0.688781547285197	Promoter (<=1kb)	RASSF10-DT
cluster_1	chr11_130146003_130146898	27.28900721311	2.22027234158729	1.51212332113405	2.06929097661941	0.922483912580429	Distal Intergenic	APLP2
cluster_1	chr11_130159316_130160291	9.92992319204949	5.87927019058807	3.27356387314656	3.44593649637557	0.804384572315367	Promoter (<=1kb)	ST14
cluster_1	chr11_130377913_130378765	16.7958854077227	0.824671934167067	0.491771085305307	1.3369704897305	0.89949290337383	Intron (ENST00000602376.5/646383, intron 2 of 5)	ZBTB44-DT
cluster_1	chr11_130403262_130404561	14.9324869777664	1.57694501895167	1.56282800274633	3.82244254746455	0.804492393721267	Promoter (1-2kb)	ZBTB44-DT
cluster_1	chr11_130431234_130431673	18.0714277039243	11.9460691292426	6.75860820282997	6.47408895372558	0.743158844238093	Promoter (2-3kb)	ADAMTS8
cluster_1	chr11_130760210_130761168	5.6428858130418	2.9949643401716	1.25750012360677	0.940699825921205	0.779295903765715	Distal Intergenic	LOC105369576
cluster_1	chr11_131217456_131218390	12.9292321503236	1.50848408555844	1.1355547969019	1.82104594513075	0.902508412417423	Distal Intergenic	LOC107984412
cluster_1	chr11_131246146_131247140	16.8429692252669	4.8006370155526	3.0589275672028	1.70514391516876	0.960986437471239	Intron (ENST00000441638.1/ENST00000441638.1, intron 1 of 1)	LOC107984412
cluster_1	chr11_131253094_131254991	15.043797504136	4.54251248714582	3.38411135547094	2.82690102712271	0.984765207913436	Exon (ENST00000416553.2/ENST00000416553.2, exon 1 of 2)	LOC107984412
cluster_1	chr11_131465707_131466175	18.5143523694505	6.69727460122767	5.03472939192683	4.41819861761592	0.983835075497622	Intron (ENST00000374791.7/50863, intron 1 of 7)	NTM
cluster_1	chr11_131503981_131504716	13.6065296132955	5.71538796845329	5.72634842059461	4.27274161316081	0.921815927718217	Intron (ENST00000374791.7/50863, intron 1 of 7)	LOC101929653
cluster_1	chr11_131584546_131585700	9.81098721705556	1.4349399208586	1.25736343991517	1.27412871616004	0.92849052678534	Promoter (2-3kb)	NTM
cluster_1	chr11_131656412_131657157	18.0104357255798	2.08742970960685	2.81968889307488	1.35088511549479	0.91166938895381	Intron (ENST00000374791.7/50863, intron 1 of 7)	NTM-AS1
cluster_1	chr11_131904525_131905348	18.6696753259076	3.08164433044651	3.0522324458348	1.46776960010765	0.941719262609844	Intron (ENST00000374791.7/50863, intron 1 of 7)	NTM
cluster_1	chr11_131982043_131982617	25.3995765580772	5.56964218264586	1.87221166106399	1.51383332286735	0.975130401850604	Intron (ENST00000374791.7/50863, intron 2 of 7)	NTM
cluster_1	chr11_133509857_133510834	12.4388750044477	1.54476575852205	1.55181998881821	0.758556938363003	0.938661331470157	Intron (ENST00000524381.6/4978, intron 1 of 7)	OPCML
cluster_1	chr11_133529859_133530786	14.5314883375278	4.04135322011565	0.969042168284124	2.41718105833954	0.909562283190751	Promoter (1-2kb)	OPCML
cluster_1	chr11_133540988_133542028	18.8900975082831	8.96364685400818	4.96252487305958	4.11844174108522	0.869319176594899	Intron (ENST00000663344.1/ENST00000663344.1, intron 1 of 1)	OPCML
cluster_1	chr11_133787391_133788302	16.240726637288	3.87898231832944	2.23077400260017	1.48870446654888	0.983294654268309	Intron (ENST00000526254.1/646522, intron 2 of 2)	LINC02743
cluster_1	chr11_133894960_133895659	10.3022021534032	5.24000651961146	3.27062168675061	2.73117144096204	0.869062789840412	Promoter (2-3kb)	MIR4697
cluster_1	chr11_133918158_133919093	11.6488358927601	2.19489843922209	1.91853970393679	1.62683905055511	0.947179014679201	Exon (ENST00000321016.12/22997, exon 19 of 19)	IGSF9B
cluster_1	chr11_134272792_134273491	31.9259848726575	5.08793292336578	6.21790698707945	1.59197798629198	0.909465531787735	Promoter (<=1kb)	GLB1L3
cluster_1	chr11_134275643_134277399	18.942765629861	8.35830715247994	8.08149275125133	6.10587488731662	0.927503253489622	Promoter (<=1kb)	GLB1L3
cluster_1	chr11_134359961_134360718	18.8660025833601	8.48660984651726	9.43313653651168	7.38174856754338	0.879006931510098	Exon (ENST00000529077.5/89944, exon 5 of 22)	GLB1L2
cluster_1	chr11_134413179_134413843	11.9584883397183	4.52065281899003	2.93042964868694	2.23614437567545	0.945741516357629	Promoter (<=1kb)	B3GAT1-DT
cluster_1	chr11_134466170_134466694	10.4914579388913	5.12366179488743	4.5071585635131	2.38245263704137	0.818599202216256	Promoter (<=1kb)	B3GAT1-DT
cluster_1	chr11_13486929_13488051	10.8926777648332	0.667432283820515	0.877922911047636	1.65923378856059	0.855575608574547	Distal Intergenic	PTH
cluster_1	chr11_134990169_134991173	17.1389028109566	0.868372517249873	0.77602639814987	1.35824041035608	0.899797588960638	Distal Intergenic	LOC100507548
cluster_1	chr11_14300358_14301243	14.6301690540533	4.47187991045495	5.63482541828655	8.76012220624914	0.626330866910701	Intron (ENST00000256196.9/22800, intron 1 of 5)	RRAS2
cluster_1	chr11_14340638_14341313	20.9672499511667	1.45533281128537	2.18371089561446	3.08630650882499	0.862337350769931	Promoter (<=1kb)	RRAS2
cluster_1	chr11_14350105_14350655	21.5185438477875	3.18555333410333	1.82380318704724	2.01113755960494	0.954917579930495	Intron (ENST00000256196.9/22800, intron 1 of 5)	RRAS2
cluster_1	chr11_14904863_14906210	22.504773916683	8.89983604989822	9.97360250767014	3.92453372732927	0.789561561143892	Promoter (<=1kb)	CALCB
cluster_1	chr11_14907379_14908123	14.6208142041566	3.85255789147329	3.76459976066826	4.8624883286488	0.858222232860279	Promoter (2-3kb)	CALCB
cluster_1	chr11_14969778_14970223	14.8757645854081	5.20004362784813	4.54685500383268	2.99938419671696	0.944933096303935	Promoter (<=1kb)	CALCA
cluster_1	chr11_15034749_15035747	9.74656148586806	0.74544279472864	1.02872020818337	1.87988140208703	0.835362151976046	Intron (ENST00000523376.5/797, intron 6 of 9)	CALCB
cluster_1	chr11_15552330_15553086	13.557709197038	3.50766699752124	1.56634327258864	0.263216089253754	0.93794089023094	Promoter (<=1kb)	LINC02751
cluster_1	chr11_15871817_15872562	7.06437237797247	3.54566121668881	2.89952913763601	1.36684178951994	0.792840331368134	Intron (ENST00000659436.1/ENST00000659436.1, intron 2 of 2)	LINC02682
cluster_1	chr11_16820276_16820934	8.19825326172404	3.33913331210907	4.57594967617842	4.28553396857338	0.730299981310878	Promoter (2-3kb)	PLEKHA7
cluster_1	chr11_17473289_17473780	16.9228697093621	6.41364547067633	2.48104947391726	4.29565135258881	0.881125920810631	Promoter (2-3kb)	ABCC8
cluster_1	chr11_17544017_17544666	22.0763858425205	5.91159861829705	4.01424717643762	2.49964398947036	0.974138761925627	Promoter (<=1kb)	USH1C
cluster_1	chr11_17546883_17547616	32.9591015153307	7.75533223571513	4.89330387072745	4.2732147150131	0.982959925865623	Promoter (<=1kb)	OTOG
cluster_1	chr11_17720075_17721137	14.6887445619816	5.66709962736033	4.21885103854007	2.48148711236083	0.916014987595274	Promoter (<=1kb)	MYOD1
cluster_1	chr11_1824881_1825531	22.145163755572	16.8372885061982	10.7191230678134	6.29023833601068	0.609169720551429	Promoter (2-3kb)	SYT8
cluster_1	chr11_18727346_18728013	11.0826148387057	4.05808190452658	3.75872784844736	2.80107235736769	0.951190263422356	Promoter (1-2kb)	IGSF22
cluster_1	chr11_18790908_18792687	16.5865771510624	11.7660087913595	7.72447854372702	3.82756444458643	0.630766870752245	Promoter (<=1kb)	PTPN5
cluster_1	chr11_19772202_19772901	20.9515527622771	2.50894779392776	1.83526624640677	1.34965693164914	0.950004420613269	Intron (ENST00000360655.8/89797, intron 1 of 37)	NAV2
cluster_1	chr11_19791089_19791793	28.2730261121657	1.44850332030793	1.24544201524425	1.12218976254117	0.922600735015871	Intron (ENST00000360655.8/89797, intron 1 of 37)	NAV2
cluster_1	chr11_19816889_19818295	25.4340974715286	1.20153114117186	1.2158383458406	0.970410003953425	0.919547888650105	Intron (ENST00000360655.8/89797, intron 1 of 37)	NAV2
cluster_1	chr11_20026913_20027776	64.3792953639601	8.457846300917	9.61819837581348	7.12856054724674	0.918636578966992	Promoter (<=1kb)	NAV2
cluster_1	chr11_20064822_20065811	9.13701567983703	0.947460890040228	1.48025937669696	2.14237583499669	0.818950925338956	Intron (ENST00000360655.8/89797, intron 20 of 37)	NAV2-AS2
cluster_1	chr11_20131805_20132746	12.8997975665269	4.19605567415012	4.3811833003515	3.20618087191386	0.926643642634671	Exon (ENST00000623701.1/ENST00000623701.1, exon 1 of 1)	NAV2
cluster_1	chr11_20156264_20156982	14.8576312891388	5.16718464141923	3.40907323404183	2.08914907374665	0.938791851165152	Exon (ENST00000524983.3/120237, exon 4 of 4)	DBX1
cluster_1	chr11_20363463_20364630	14.4691298475079	3.90975158354085	4.67865925286537	5.31407096144106	0.826045578363083	Promoter (<=1kb)	HTATIP2
cluster_1	chr11_20474119_20475197	10.1900319939631	2.61840120861597	3.50742554043916	3.18820691520937	0.842402756488856	Intron (ENST00000330796.9/10196, intron 12 of 14)	PRMT3
cluster_1	chr11_20544525_20545366	11.7104293707008	2.8056347908593	2.96085875687407	2.63356114379854	0.9183894049352	Distal Intergenic	SLC6A5
cluster_1	chr11_20596666_20597831	12.0995310761	6.35796537473222	7.33210224780641	2.02544828286049	0.616742521569424	Promoter (1-2kb)	SLC6A5
cluster_1	chr11_2089068_2089964	13.7707588555878	2.03891816128331	2.14203821160221	1.51568558070993	0.929454166505067	Distal Intergenic	MIR483
cluster_1	chr11_2166048_2167087	10.2454020056022	4.05917319028238	3.48842103216892	3.63279588165199	0.95625341786294	Promoter (<=1kb)	TH
cluster_1	chr11_22337560_22338127	12.0061894401085	4.0228410150802	5.4161362113986	4.49111627122199	0.817444474022678	Promoter (<=1kb)	SLC17A6
cluster_1	chr11_22340622_22341412	17.5815666103592	2.8745668293611	3.02657322089925	1.70358960412196	0.934509309794981	Promoter (1-2kb)	SLC17A6
cluster_1	chr11_22343280_22344166	15.1671879618682	3.50695445172618	3.74008936373915	2.56834825606615	0.929183986766946	Promoter (<=1kb)	SLC17A6
cluster_1	chr11_22370994_22371679	19.9009749735068	1.5290939675922	3.73897940711213	1.03754239007325	0.863976318274755	Intron (ENST00000263160.4/57084, intron 8 of 11)	SLC17A6
cluster_1	chr11_22528428_22529399	18.4930035477136	4.43621687909822	2.85443340449442	0.871611851812375	0.952814796009204	Distal Intergenic	LOC105376588
cluster_1	chr11_22634952_22636183	9.40894524811793	1.47873868181863	1.82638609231554	1.71670037561929	0.889632574570306	Intron (ENST00000528582.5/2620, intron 1 of 5)	FANCF
cluster_1	chr11_24679751_24680611	18.0496612332859	3.80843085969703	4.368091145578	0.467074130892937	0.874294521334319	Intron (ENST00000531187.5/338645, intron 1 of 5)	LUZP2
cluster_1	chr11_2693014_2694208	35.8058300665443	6.93478049518131	4.93115934419206	3.07212941579577	0.973895778157497	Exon (ENST00000597346.1/10984, exon 1 of 1)	KCNQ1OT1
cluster_1	chr11_26964770_26965830	3.78749578128383	0.538648864597988	0.878813386436377	1.23124247288543	0.769075766674909	Distal Intergenic	FIBIN
cluster_1	chr11_27347628_27348820	17.3771619277745	2.91714861969243	2.88150528393264	1.0790325722657	0.939788420709418	Promoter (1-2kb)	CCDC34
cluster_1	chr11_27444700_27445374	37.1273414546894	23.3819440460615	6.78771427758149	1.3887361186799	0.651011457709296	Intron (ENST00000389858.4/55366, intron 1 of 16)	LGR4-AS1
cluster_1	chr11_27687777_27688741	11.8030743572115	1.61893387392296	1.51784489389192	1.6486470432558	0.915529065014724	Intron (ENST00000652063.1/497258, intron 5 of 5)	BDNF
cluster_1	chr11_27722223_27723290	18.3076417269802	6.71827725786586	5.98923045929583	7.9079707478918	0.845093621680791	Promoter (<=1kb)	BDNF
cluster_1	chr11_27796145_27796937	11.4890035029268	6.97806604180158	3.05506828625038	3.14738512422882	0.744264221234144	Intron (ENST00000530663.1/ENST00000530663.1, intron 1 of 1)	BDNF
cluster_1	chr11_28793060_28794118	18.0053561986522	1.14893766597414	1.01323291055847	1.44439110830861	0.907311729132018	Intron (ENST00000662190.1/ENST00000662190.1, intron 2 of 2)	LINC02742
cluster_1	chr11_30025341_30026256	15.9939180629888	3.18518854044869	2.45776798129112	1.07923411576587	0.963668391387113	Distal Intergenic	KCNA4
cluster_1	chr11_30196469_30197018	9.93143152806745	3.13024524113629	4.02028839092273	4.77259543032481	0.746407277904032	Intron (ENST00000662729.1/105376607, intron 3 of 4)	FSHB
cluster_1	chr11_30453645_30454378	15.8290147352448	1.57504300353612	1.79181100842209	1.93063088799033	0.899530058490204	Intron (ENST00000448418.6/744, intron 4 of 6)	MPPED2
cluster_1	chr11_304874_306032	11.9443574509077	5.03217804268843	3.20107842071957	3.15707883120194	0.944780763128797	Promoter (1-2kb)	IFITM2
cluster_1	chr11_30560379_30561171	13.4182848396363	4.48778269306334	3.13716642231052	7.27716963722678	0.671120954762026	Intron (ENST00000448418.6/744, intron 2 of 6)	MPPED2-AS1
cluster_1	chr11_307777_308442	16.5415855626006	13.4618011160077	6.91233173305732	8.18831016713111	0.605813006618579	Promoter (<=1kb)	IFITM2
cluster_1	chr11_3091578_3092389	21.7705106943724	4.87613304310488	4.64771197529571	3.97875939379341	0.940178862612738	Promoter (<=1kb)	OSBPL5
cluster_1	chr11_3109807_3110536	16.7699072672283	1.25670193323442	1.17803666299755	2.52832433445156	0.866478160276416	Intron (ENST00000263650.12/114879, intron 7 of 21)	OSBPL5
cluster_1	chr11_3169225_3169991	13.9742466279927	5.16147297498081	3.22627418927866	7.995409059078	0.649522491519973	Promoter (2-3kb)	OSBPL5
cluster_1	chr11_31819608_31820830	20.3163624080518	6.88386684476725	13.337723726324	8.39324626577708	0.612458108631136	Promoter (1-2kb)	PAX6
cluster_1	chr11_31863187_31864039	9.72134464278079	2.35766974349053	2.36478130040376	2.58080264262863	0.898949252754788	Intron (ENST00000530348.5/5954, intron 1 of 3)	PAUPAR
cluster_1	chr11_3188862_3189891	11.2263973613257	3.06049829909265	2.96652483471892	1.75517579257845	0.938053468242415	Exon (ENST00000455154.1/ENST00000455154.1, exon 1 of 2)	OSBPL5
cluster_1	chr11_3223853_3224658	10.4090481698131	5.64757249431302	2.85386817560155	2.98974534793656	0.820979238768438	Distal Intergenic	MRGPRG
cluster_1	chr11_32312835_32313631	10.0997016934568	2.48995262099336	2.04482893256703	3.85818050448969	0.78739316374048	Intron (ENST00000525689.2/ENST00000525689.2, intron 1 of 1)	WT1
cluster_1	chr11_32333305_32334238	13.0879566944596	4.76073674090511	4.23201538629325	2.69397397993471	0.932524645648086	Intron (ENST00000525689.2/ENST00000525689.2, intron 1 of 1)	WT1
cluster_1	chr11_32430768_32431380	19.4684994583919	8.19414898751539	8.39782119091676	4.84690037739682	0.85913138043921	Promoter (<=1kb)	WT1
cluster_1	chr11_32435513_32436173	22.073508582227	6.87242864062	5.12384450666235	3.58537122267582	0.971283753104328	Promoter (<=1kb)	WT1-AS
cluster_1	chr11_32829503_32830596	14.2549383464921	7.02396710803511	7.56720466956128	7.93719888488359	0.82975192879653	Promoter (<=1kb)	PRRG4
cluster_1	chr11_33065430_33065998	17.9649569352958	6.9817173922665	6.63268276197175	4.68217654485293	0.932522281604331	Promoter (2-3kb)	TCP11L1
cluster_1	chr11_3408294_3409118	11.0267049602266	3.70899225267372	2.04253214480922	2.7076310144517	0.938403266532498	Exon (ENST00000685598.1/650368, exon 9 of 9)	TSSC2
cluster_1	chr11_34233956_34234767	19.3039065292475	4.47431629117061	2.44358882545811	5.99322005742617	0.824804561988216	Intron (ENST00000435224.3/25841, intron 1 of 16)	ABTB2
cluster_1	chr11_34512816_34513800	7.85631398463771	4.79833812488797	2.96820646508506	1.81247019445852	0.737479889192101	Promoter (<=1kb)	ELF5
cluster_1	chr11_3454297_3455299	8.28726567959218	3.34751595848782	2.94649034008894	3.19480111486544	0.935654976876193	Intron (ENST00000637148.1/ENST00000637148.1, intron 1 of 3)	LOC105376526
cluster_1	chr11_35237359_35238528	5.69641678655092	3.16372494510583	2.32468766410981	0.876163381307669	0.725092240046167	Distal Intergenic	CD44
cluster_1	chr11_35525366_35526241	24.6211876832185	10.929790485735	7.40398342955899	7.60580109270748	0.948578511838955	Promoter (<=1kb)	PAMR1
cluster_1	chr11_36033053_36033910	15.7715422425412	3.27134107219298	4.88022938566523	2.88833344323481	0.85838000815428	Intron (ENST00000524419.5/143458, intron 1 of 5)	MIR3973
cluster_1	chr11_36069826_36070975	11.6697767166347	4.16325651759285	2.94400924796475	4.5198412868658	0.855813292033511	Intron (ENST00000524419.5/143458, intron 1 of 5)	LDLRAD3
cluster_1	chr11_3824591_3825193	23.0435894731458	3.25666092154639	2.80752335454679	1.93588887389149	0.947171523473392	Promoter (<=1kb)	PGAP2
cluster_1	chr11_3826512_3827232	21.748629018468	0.938627975959789	1.95537902521998	0.776091840228536	0.901975278062136	Promoter (1-2kb)	PGAP2
cluster_1	chr11_393884_394697	13.2177274876145	3.4169909599335	2.4302056135548	2.8043968911855	0.95137285373163	Promoter (<=1kb)	PKP3
cluster_1	chr11_406602_407803	13.1188554694252	7.90088855808638	4.78119089345648	4.41736646613687	0.80449538647914	Promoter (<=1kb)	SIGIRR
cluster_1	chr11_416640_417822	23.7193387371125	7.67793958635615	4.19930965850074	5.62253925265025	0.940352495431052	Promoter (<=1kb)	SIGIRR
cluster_1	chr11_4175557_4176370	7.28432993125338	2.39981887663471	1.89385706978987	1.85503097326158	0.975116962103881	Distal Intergenic	LINC02749
cluster_1	chr11_43576796_43577429	19.7753704745584	11.1407177631872	7.77840545053807	8.25393213157319	0.894941327126725	Promoter (<=1kb)	HSD17B12
cluster_1	chr11_44065711_44066809	26.9180276546361	12.7974765291158	9.80322263152787	11.4908288997946	0.92473264050259	Promoter (<=1kb)	ACCS
cluster_1	chr11_441489_442263	16.2728092352605	7.15156955196059	3.71094915002575	2.13952970430971	0.853046483265679	Promoter (<=1kb)	ANO9
cluster_1	chr11_44285843_44286784	9.84093697694247	6.13071427893282	3.58150540640559	3.94215768707439	0.794546025226086	Intron (ENST00000652299.1/60529, intron 1 of 3)	ALX4
cluster_1	chr11_44334403_44335406	10.4511189701039	6.25492710959296	2.80900149034921	1.39279296197222	0.70693988521082	Distal Intergenic	ALX4
cluster_1	chr11_44467392_44468304	8.50596450506885	5.01942832863204	2.4496922186734	1.61873728017879	0.739173662810228	Distal Intergenic	CD82
cluster_1	chr11_44670773_44671882	18.1752101273341	1.52739837709504	0.576359071226687	1.46818648490413	0.921115300696888	Distal Intergenic	LINC02704
cluster_1	chr11_44753497_44754588	10.5830466082498	7.50777321657977	5.94135266097244	2.62545251713323	0.603770686361377	Intron (ENST00000533786.5/90139, intron 1 of 6)	TSPAN18
cluster_1	chr11_44927037_44927775	10.5148519141794	4.64797111063015	5.91226500646816	3.29780534552884	0.751759651317308	Promoter (<=1kb)	TSPAN18
cluster_1	chr11_44943775_44944600	15.1568908525407	5.30047769760799	4.51869955668042	2.17706846915991	0.904118960184059	Promoter (<=1kb)	TP53I11
cluster_1	chr11_45082788_45083859	11.6333494618902	2.86104274115377	4.94221231616853	3.90763255388973	0.765095161558615	Distal Intergenic	PRDM11
cluster_1	chr11_45091577_45092554	14.5105850490162	2.8056553877049	1.77869108778999	3.0865232987616	0.897543655276534	Distal Intergenic	PRDM11
cluster_1	chr11_45233338_45233935	11.9736620497421	5.30333455589354	2.79783652561833	4.39016213092412	0.856321554952134	3' UTR	PRDM11
cluster_1	chr11_45816577_45817252	14.2822730154261	2.48806350896007	1.46935420729514	1.51406245524525	0.963580194785185	Intron (ENST00000534128.1/ENST00000534128.1, intron 1 of 2)	SLC35C1
cluster_1	chr11_45921684_45922839	43.8653157156394	14.9040883359723	15.2835363382275	14.8775247771883	0.912478933902397	Promoter (<=1kb)	LARGE2
cluster_1	chr11_46001136_46001935	19.4546333958446	6.4289265744047	7.42014099068215	3.88642684889295	0.864345167251386	Intron (ENST00000676320.1/51317, intron 6 of 18)	PHF21A
cluster_1	chr11_46202097_46203152	8.89718374501123	3.06878334035288	1.12409265077102	0.796579381076254	0.905294023532075	Distal Intergenic	LINC02710
cluster_1	chr11_46338779_46339653	50.5011984024246	8.91623599571815	7.11307342712142	5.02577630121832	0.960419907510639	Promoter (<=1kb)	DGKZ
cluster_1	chr11_46352093_46352621	18.8182052338481	6.13595691914569	4.71142564802893	2.95746840481872	0.954231911318714	Intron (ENST00000343674.10/8525, intron 1 of 30)	DGKZ
cluster_1	chr11_4636799_4637521	12.9290355103792	5.59170382777348	7.08286914344552	5.45157647773761	0.805185746219104	Promoter (<=1kb)	OR51D1
cluster_1	chr11_46369411_46369895	17.6449937677572	8.87769310044447	6.03827722484913	8.50736688513753	0.836936046825241	Promoter (1-2kb)	DGKZ
cluster_1	chr11_46537189_46538290	11.8243412174239	4.74061358577983	3.37940951189178	5.24730911587761	0.826571429567757	Intron (ENST00000314845.7/55626, intron 8 of 18)	AMBRA1
cluster_1	chr11_46912443_46913277	32.3709378006768	14.1343887141008	14.4399716652962	7.78160717998514	0.834747707433741	Intron (ENST00000378623.6/4038, intron 1 of 37)	LRP4
cluster_1	chr11_47118752_47119398	11.5582459113123	4.32699590659385	3.34488590960934	4.56481388840836	0.87652486015643	Intron (ENST00000528488.5/79096, intron 3 of 9)	CSTPP1
cluster_1	chr11_47130476_47131033	8.59701983301597	7.54962400561587	1.34755439481821	1.1136596135056	0.51639171849267	Exon (ENST00000532022.1/ENST00000532022.1, exon 1 of 2)	CSTPP1
cluster_1	chr11_47160967_47161997	19.4402035562621	6.66363463415139	5.40686049878461	5.66731328182187	0.960272593660444	3' UTR	CSTPP1
cluster_1	chr11_47185120_47186776	26.9899393872629	14.0556510462841	10.6837079860317	19.1936879277606	0.597458018780752	Promoter (<=1kb)	PACSIN3
cluster_1	chr11_47257380_47258241	19.7321921759705	10.1211459049	5.86433359160608	5.61336968155703	0.865910470061232	Promoter (<=1kb)	NR1H3
cluster_1	chr11_47259196_47259934	21.0151231833245	7.53654981477992	5.0075164891539	5.03757768651323	0.973534431147249	Promoter (<=1kb)	NR1H3
cluster_1	chr11_47399911_47401159	16.0004912216721	8.06138688179969	5.17248850927088	4.81628377129521	0.894818336619116	Promoter (<=1kb)	MIR4487
cluster_1	chr11_47564945_47566394	15.741761004169	8.33718948129987	7.57484613926342	10.2818706334876	0.716229378976213	Promoter (<=1kb)	CELF1
cluster_1	chr11_47943742_47944670	9.85062076926725	5.36759645887585	5.73448652036797	3.14969724721255	0.734643814172563	Distal Intergenic	PTPRJ
cluster_1	chr11_5624774_5625619	7.9322738598226	2.67452441636567	1.22418720195438	3.08369747399841	0.786863011781208	Promoter (<=1kb)	TRIM34
cluster_1	chr11_56659628_56660358	19.8651481520019	4.49574940763578	4.16015600346343	2.07303033071596	0.945222346970549	Distal Intergenic	OR5AR1
cluster_1	chr11_57155897_57156744	11.4866561498244	3.69088470273685	4.0381884426538	2.45915865010766	0.900216488143774	Distal Intergenic	LRRC55
cluster_1	chr11_57349495_57350259	11.203739937624	4.29072197815755	5.27959715779325	3.8219203074294	0.846314498022554	Promoter (2-3kb)	P2RX3
cluster_1	chr11_57364864_57365716	13.213459628642	3.39555069905059	2.06413281889075	2.91047638501114	0.933476518061157	Intron (ENST00000263314.3/5024, intron 8 of 11)	PRG3
cluster_1	chr11_57480362_57480808	19.4978285383112	7.56397753402714	6.58160981874813	2.21500344972144	0.835865531684413	Distal Intergenic	SLC43A1
cluster_1	chr11_57493333_57493997	17.3095424668588	2.49218269517074	2.82162192782748	3.16139218237463	0.887278067292142	Promoter (<=1kb)	SLC43A1
cluster_1	chr11_57514131_57515019	16.7118296329105	7.97768094992527	5.33312252479999	10.7617820344036	0.631374667121723	Promoter (<=1kb)	SLC43A1
cluster_1	chr11_57646768_57647844	25.5429773391278	7.05575300626465	5.33730924517685	3.53986459816553	0.973136560801535	Promoter (<=1kb)	YPEL4
cluster_1	chr11_57649411_57649737	20.4632265709936	10.5764597539962	9.06398109115829	4.33186046588278	0.777869810313272	Promoter (<=1kb)	YPEL4
cluster_1	chr11_57781282_57781981	19.9794172124171	4.53890405876583	4.07959436677682	3.68641053954567	0.945621377480147	Promoter (<=1kb)	TMX2-CTNND1
cluster_1	chr11_57868247_57869242	16.4760686746208	0.573340732239107	0.708016470826103	2.64075471453544	0.832940281174315	Intron (ENST00000641215.1/ENST00000641215.1, intron 1 of 2)	CTNND1
cluster_1	chr11_58923222_58923785	15.2081520108659	4.60556848521847	3.18709810356857	6.00122962267491	0.804079627957958	Intron (ENST00000534674.5/92292, intron 1 of 2)	GLYATL1
cluster_1	chr11_59102129_59102617	18.3254313483174	5.03532987982685	7.05776590328216	2.89678831762255	0.81933764087039	Exon (ENST00000688864.1/ENST00000688864.1, exon 1 of 1)	FAM111B
cluster_1	chr11_59144527_59145239	15.8918147430958	5.22490924909759	6.83129807235891	9.69987673319128	0.626443800997108	Promoter (<=1kb)	FAM111A
cluster_1	chr11_59557221_59557900	29.5945318199882	6.14292711092122	5.30016762156068	11.9657539760082	0.739841248556927	Intron (ENST00000659845.1/102723575, intron 1 of 1)	LINC02739
cluster_1	chr11_60851793_60853095	7.30993878018799	4.25698043048805	3.42829240165587	1.71358982905242	0.734800941665836	Promoter (2-3kb)	PTGDR2
cluster_1	chr11_60950875_60952385	12.0203579316977	6.29263245308478	4.5837559010683	2.78206253483361	0.822730363480381	Promoter (<=1kb)	SLC15A3
cluster_1	chr11_61007502_61008924	17.4319695017092	6.95714056654729	5.75385833875215	4.04140769477121	0.940841153786902	Promoter (<=1kb)	CD6
cluster_1	chr11_61021472_61022275	15.3999574550314	3.19317042053907	1.84373382862324	2.64280691656152	0.938569414938815	Distal Intergenic	CD6
cluster_1	chr11_61281482_61282229	17.928223576134	7.72609013506635	8.58116392224197	5.43031006267274	0.847099564412648	3' UTR	VWCE
cluster_1	chr11_61482475_61483058	14.444307213848	8.08602749567487	4.03939180353511	3.15514136226233	0.781060919909602	Promoter (1-2kb)	PPP1R32
cluster_1	chr11_61541576_61542553	17.1224513905792	5.54389980495825	3.09094005521234	5.62848896961199	0.862454995385597	Promoter (<=1kb)	SYT7
cluster_1	chr11_61587155_61588949	24.8593162977731	10.1152811482619	7.38504898384355	9.41087216792857	0.911413205425622	Promoter (<=1kb)	LOC101927495
cluster_1	chr11_61599418_61600300	16.975479957929	5.72662746858444	3.02531936081266	7.00052320410219	0.778271790703692	Intron (ENST00000667359.1/101927495, intron 2 of 3)	LOC101927495
cluster_1	chr11_61626502_61627287	32.5569996006007	5.17747186239539	5.26515373080815	11.8066425170908	0.749541366584635	Promoter (1-2kb)	RPLP0P2
cluster_1	chr11_61718144_61719204	22.5837693514674	13.9424040244123	11.7423626259979	7.06846681972685	0.743669303046642	Intron (ENST00000257215.10/747, intron 1 of 19)	MYRF
cluster_1	chr11_61777137_61777804	14.4047007280634	3.19931549786594	2.61696339727883	3.80051391133644	0.883021548320176	Promoter (<=1kb)	MYRF
cluster_1	chr11_61904284_61905179	14.1470404418849	7.4425974430833	6.29510449073642	3.53660065935915	0.805014475632772	Promoter (<=1kb)	RAB3IL1
cluster_1	chr11_61954940_61956436	25.8339803570194	6.65286240834681	4.84487283313615	5.24119699035631	0.958499742974735	Promoter (<=1kb)	BEST1
cluster_1	chr11_62310912_62311593	13.0012983119236	6.5298818014842	4.52750866501333	5.40808901669746	0.907248400477542	Distal Intergenic	SCGB1D4
cluster_1	chr11_62560469_62561031	26.809315412954	12.8006503432582	8.22596309256789	19.1987232472076	0.556202373332968	Intron (ENST00000329251.5/1937, intron 7 of 9)	AHNAK
cluster_1	chr11_62757827_62758375	33.888369932008	1.7005969464923	1.12575376972259	3.0976033905965	0.89221759521471	Distal Intergenic	POLR2G
cluster_1	chr11_62850504_62852130	26.7193082089904	7.4032619909012	2.36415172773537	2.1032411919559	0.945827084198638	Promoter (<=1kb)	SNORD22
cluster_1	chr11_62862273_62863154	14.878127948346	8.96808400807345	6.76848575262692	4.56019359567828	0.783923614164107	Intron (ENST00000680002.1/6520, intron 1 of 12)	SLC3A2
cluster_1	chr11_62906016_62906371	17.8935438900889	9.45764126059794	6.41533653954021	8.33576041219469	0.862725391783972	Distal Intergenic	LOC105369333
cluster_1	chr11_62908908_62909992	26.489315979429	3.93330566711162	3.58223849238355	7.98156648096365	0.794540742084798	Promoter (<=1kb)	LOC105369333
cluster_1	chr11_62925372_62926098	13.3619041987334	5.12163800968057	3.41242372916821	3.19254691632431	0.966853847042239	Distal Intergenic	CHRM1
cluster_1	chr11_6323274_6323758	34.0053846887349	0.802312943447687	1.27774150143225	1.82138665916446	0.896659423399214	Promoter (<=1kb)	LOC101927825
cluster_1	chr11_6353302_6353843	15.8485522429875	4.72882130200128	4.04078670054047	5.21718625420468	0.888472749778784	Intron (ENST00000655261.1/101927825, intron 5 of 5)	LOC101927825
cluster_1	chr11_63761809_63763598	27.5635251902349	21.2949976150834	16.8524287702889	10.8411974589194	0.615774847673449	Promoter (2-3kb)	ZFTA
cluster_1	chr11_63763813_63764449	40.5549100596517	22.537414329683	21.9817489940169	9.51740716934787	0.700086859300992	Promoter (1-2kb)	ZFTA
cluster_1	chr11_63882745_63883379	14.2069948660749	3.55452625777689	3.34627970358709	6.47002338989866	0.723443012550838	Intron (ENST00000377810.8/2011, intron 1 of 17)	MARK2
cluster_1	chr11_63888238_63888949	14.284498945088	5.60690381369714	3.30564097973681	5.03972880802011	0.880936940319565	Promoter (<=1kb)	MARK2
cluster_1	chr11_63907777_63908213	16.2767607364643	11.5078459454476	7.19466451470174	4.42626042467532	0.658508131662306	Intron (ENST00000377810.8/2011, intron 16 of 17)	RCOR2
cluster_1	chr11_63909540_63910498	23.7550117064985	17.6725992524995	8.62852867192562	6.37905785693829	0.628140671583321	Promoter (1-2kb)	RCOR2
cluster_1	chr11_63916152_63919811	34.1946926984448	26.4525905682661	22.0828966454261	12.0313909770886	0.572571900415142	Promoter (<=1kb)	RCOR2
cluster_1	chr11_63920181_63920511	45.6700771693146	22.7595843156779	15.502384388225	15.2251016302764	0.921280086873708	Distal Intergenic	RCOR2
cluster_1	chr11_63998502_64000831	25.9427148013489	16.158400556256	14.1675955523702	10.21889859909	0.803904957838616	Promoter (<=1kb)	MACROD1
cluster_1	chr11_64249435_64249905	41.8012562417114	5.03882177805945	1.27799113532479	1.58231858865499	0.967743906567123	Promoter (1-2kb)	PLCB3
cluster_1	chr11_64340580_64341361	32.2813199781415	7.72323309811089	5.23221581103974	5.66173196434359	0.962922129666135	Promoter (<=1kb)	CCDC88B
cluster_1	chr11_64356508_64356911	18.6753478845351	8.10366889739259	7.29131858036151	4.83645288135807	0.907168691111763	Promoter (1-2kb)	CCDC88B
cluster_1	chr11_64372782_64373725	12.4069206664999	5.29595857615836	2.28489592368137	1.65116187040502	0.860421861822705	Distal Intergenic	MIR1237
cluster_1	chr11_64565274_64566095	13.8087445540202	8.36163031803846	3.98546241384161	2.4119600479475	0.717929887234616	Promoter (1-2kb)	SLC22A11
cluster_1	chr11_64629972_64630897	25.6418856969001	2.85076243330192	5.02782264407704	4.68143342678923	0.849016143160419	Exon (ENST00000301894.6/9379, exon 3 of 7)	NRXN2
cluster_1	chr11_64652900_64653728	19.7226831137886	7.40133904025118	6.60773547873188	5.18141048939106	0.962984046517681	Promoter (2-3kb)	NRXN2
cluster_1	chr11_64711114_64711858	25.8284295385245	9.71620878299483	8.11146382000468	4.94573107994213	0.924937679357164	Promoter (<=1kb)	NRXN2
cluster_1	chr11_64729645_64730538	16.3867059023433	7.30017446633361	5.41016517775874	2.78808856592396	0.855804719042306	3' UTR	RASGRP2
cluster_1	chr11_64742685_64743340	20.2405584376992	11.2854381042891	8.26097297165748	8.12325116486406	0.911565368394024	Promoter (<=1kb)	RASGRP2
cluster_1	chr11_64743598_64743852	35.3622983784351	9.38095467108162	9.36592347235007	6.83338828751145	0.941081319117553	Promoter (<=1kb)	RASGRP2
cluster_1	chr11_64744668_64746351	21.3945524639377	13.4696902321153	10.2031074132711	8.83911087285685	0.841137368834563	Promoter (<=1kb)	RASGRP2
cluster_1	chr11_64759722_64760621	31.4809877628217	29.1549599619764	13.7759686945266	14.3166478993123	0.512941056227277	Promoter (<=1kb)	PYGM
cluster_1	chr11_64762433_64764442	20.5708201205784	11.9627091291172	14.8426824247112	6.27248090780324	0.575673574116054	Promoter (2-3kb)	PYGM
cluster_1	chr11_64844320_64845089	29.5841931151573	13.6335233789045	7.88414853383086	11.858542379586	0.853051779360762	Promoter (<=1kb)	CDC42BPG
cluster_1	chr11_64846962_64847550	34.399302412877	13.8312600872482	12.2271983079897	14.5182923073041	0.892992664835182	Promoter (2-3kb)	CDC42BPG
cluster_1	chr11_64887751_64888537	25.9499018611891	14.385918576904	11.2156283581696	9.90176045494473	0.913162300174459	Promoter (<=1kb)	EHD1
cluster_1	chr11_64996459_64997361	19.8599226859352	10.2836016395326	5.48269020011001	4.64623943148439	0.832557702725259	Promoter (<=1kb)	BATF2
cluster_1	chr11_65066454_65067507	18.4554515425034	4.35002530967884	1.71230522877231	1.95693416357153	0.970734960567052	Exon (ENST00000529290.5/113130, exon 5 of 6)	NAALADL1
cluster_1	chr11_65184186_65184573	27.5375006932222	7.98705036001185	6.09270699107233	4.22064798945652	0.973876927593629	Promoter (<=1kb)	CAPN1
cluster_1	chr11_65204235_65205339	20.8817806308366	4.76395640002529	2.60757430032205	2.30251562940818	0.984246543079934	Promoter (<=1kb)	CAPN1
cluster_1	chr11_65213192_65214199	37.4477378283648	3.01979781055344	2.40780303278756	3.01117123128321	0.918275382300442	Promoter (<=1kb)	SLC22A20P
cluster_1	chr11_65224894_65226137	17.521472050332	9.66974043974929	6.87290478444951	10.253171431834	0.754997522914569	Exon (ENST00000525264.5/440044, exon 6 of 6)	SLC22A20P
cluster_1	chr11_65316933_65317505	19.2193816953511	9.68687485369204	5.58312595131438	5.87445176247243	0.877711985946308	Promoter (<=1kb)	CDC42EP2
cluster_1	chr11_65538966_65541238	28.8509466739809	16.2978428567279	12.2085755800813	15.371316111444	0.853053699972521	Promoter (<=1kb)	LTBP3
cluster_1	chr11_65553192_65554018	20.2658880333588	13.1702049394439	8.53725396655079	2.68362643431319	0.639822057151895	Promoter (<=1kb)	LTBP3
cluster_1	chr11_65586708_65587172	21.4031198190927	8.1146449145616	4.00366573430783	2.81103528647082	0.906513805901999	Promoter (2-3kb)	EHBP1L1
cluster_1	chr11_65606712_65607787	54.798138544178	30.7974449406191	30.2356305526089	15.6264196580665	0.729525573329687	Promoter (<=1kb)	MAP3K11
cluster_1	chr11_65641897_65642473	27.6834107269046	6.66068736473303	6.15873933241829	4.14812108949988	0.953174565410249	Promoter (<=1kb)	SIPA1
cluster_1	chr11_65646752_65647697	28.0737484500816	6.23244783665958	4.77159977912316	4.38270870975822	0.963535560356872	Promoter (<=1kb)	SIPA1
cluster_1	chr11_65787858_65788732	17.0139290055427	6.56070346734156	2.32848028687785	3.3985738826073	0.886668904809338	Promoter (<=1kb)	OVOL1
cluster_1	chr11_65851137_65851835	15.0661022127723	4.34724460226601	3.20639014001834	2.87684696930694	0.982637696409069	Exon (ENST00000526972.5/254122, exon 5 of 5)	CFL1
cluster_1	chr11_65867129_65868484	15.3711854387476	9.79370819929446	5.16400431054769	3.60405826906364	0.714773854921089	Promoter (<=1kb)	EFEMP2
cluster_1	chr11_65891817_65892049	32.3893581399689	22.1974117253289	11.6535267713791	12.2935375357205	0.714461102754712	Promoter (1-2kb)	CCDC85B
cluster_1	chr11_65945265_65946144	13.726539259338	10.2579564635037	4.70593786591647	0.941778426803205	0.570473817864729	Promoter (<=1kb)	TSGA10IP
cluster_1	chr11_66022285_66023046	20.5603431073859	9.12775566809456	6.3318210930695	5.2135238823878	0.931342673964532	Promoter (1-2kb)	CATSPER1
cluster_1	chr11_6629681_6631032	18.0366753701311	7.67955310099779	7.75145532486182	4.48338560242794	0.860266611367716	Promoter (2-3kb)	DCHS1
cluster_1	chr11_66363939_66364519	23.4436790552588	5.69121644876683	2.3883693973493	1.67579185433303	0.97306705051919	3' UTR	B4GAT1-DT
cluster_1	chr11_66370997_66372643	54.1829261516929	30.5920026214438	22.2396265338257	14.1920881352757	0.799393299745175	Promoter (<=1kb)	SLC29A2
cluster_1	chr11_66419803_66420227	15.4892907190218	8.46743140480325	4.89171424374948	1.3319103444314	0.720366206922692	Promoter (<=1kb)	NPAS4
cluster_1	chr11_66718385_66719120	13.3885046956252	5.2981919820111	3.75664840721047	3.81597242867581	0.972023192722313	Promoter (<=1kb)	SPTBN2
cluster_1	chr11_66720193_66720810	15.5350114544298	7.76658906112118	3.71042056131571	5.5372672964295	0.830221946506433	Promoter (<=1kb)	SPTBN2
cluster_1	chr11_66868653_66869199	27.6465647150675	7.59911395583615	5.86473374784872	6.81381444958742	0.93993432127724	Promoter (2-3kb)	PC
cluster_1	chr11_66975854_66976389	16.109439334711	7.57281263925974	4.95197450835931	5.57428279541592	0.924598503713122	Promoter (<=1kb)	C11orf86
cluster_1	chr11_67053855_67054359	15.554671951085	9.21730804951688	5.34073406478559	7.90737550833762	0.769065891232021	Promoter (2-3kb)	RHOD
cluster_1	chr11_67071342_67072125	22.8516378951757	5.24550933550426	4.78889785446247	2.88206782138361	0.952734707437505	3' UTR	RHOD
cluster_1	chr11_67081433_67082442	11.6915240613357	4.71989752480837	3.10135614499912	4.27766562262875	0.897410465847072	Distal Intergenic	RHOD
cluster_1	chr11_67276941_67278057	18.8566788169403	7.20734276834666	6.94491994730848	10.1775378337728	0.736881536351324	Promoter (<=1kb)	GRK2
cluster_1	chr11_67396410_67397181	8.64467136275998	4.29606214560203	2.22319193539858	3.41859615758139	0.828518940455388	Promoter (<=1kb)	RAD9A
cluster_1	chr11_67409855_67410518	27.6447618094539	3.98421254001193	3.27028586237311	4.09789624278778	0.916421442093032	Promoter (<=1kb)	TBC1D10C
cluster_1	chr11_67415100_67416224	14.6651975204739	6.22330363881048	3.04293072091321	5.30275594617396	0.843353063734334	Promoter (<=1kb)	CARNS1
cluster_1	chr11_67436250_67437513	12.6152925319148	4.51312173215303	2.68393911568684	3.42151494672182	0.938541325637844	Promoter (<=1kb)	PTPRCAP
cluster_1	chr11_67613943_67614747	12.3729622586025	8.20159420989243	5.05201139280172	2.95524209089475	0.687778962230767	Promoter (1-2kb)	DOC2GP
cluster_1	chr11_67710746_67712048	10.3993288992548	4.91868113379318	3.67253310770147	3.03815015791506	0.931288134472901	Exon (ENST00000530315.1/ENST00000530315.1, exon 3 of 3)	ALDH3B2
cluster_1	chr11_67825795_67826935	5.02226758328778	3.10832949649822	1.60713372363506	2.07704732110961	0.766979188390694	Intron (ENST00000611822.1/ENST00000611822.1, intron 2 of 3)	FAM86C2P
cluster_1	chr11_67942792_67943806	13.5612978050111	5.55521319530759	6.95703253349005	2.33514195864394	0.718637980637873	Intron (ENST00000527543.2/112268076, intron 1 of 3)	LOC112268076
cluster_1	chr11_67990650_67992135	17.9927251288846	5.47604213148403	5.15635978849452	3.82983676075384	0.952896133776318	3' UTR	UNC93B1
cluster_1	chr11_68020562_68021117	12.8798230371031	4.45349522506628	3.65684990707877	5.54692699413887	0.817054806317363	Promoter (<=1kb)	ALDH3B1
cluster_1	chr11_68038441_68039265	22.0382068675661	10.616109335423	6.352616517535	9.22553925868142	0.850965140690141	Promoter (<=1kb)	TCIRG1
cluster_1	chr11_68040238_68040680	17.0423334674678	10.6218302516665	3.55552982119056	11.9128974320709	0.524016036742502	Promoter (1-2kb)	TCIRG1
cluster_1	chr11_68127877_68129099	38.4855319407251	18.393942948672	14.8758613919717	19.8151879228757	0.834013936119411	Exon (ENST00000530842.2/105369362, exon 2 of 3)	CHKA-DT
cluster_1	chr11_6817566_6818505	5.91605720040917	1.7422272002956	1.24715778862413	2.79515715143842	0.7199709412902	Distal Intergenic	OR6A2
cluster_1	chr11_68209224_68209938	12.9498509724557	4.59481984310958	4.4430142129427	7.70372815949407	0.653745449424527	Promoter (2-3kb)	KMT5B
cluster_1	chr11_68257320_68258085	12.9175148736684	5.54770664682385	5.5273982252476	6.04746773081786	0.875970707733708	Distal Intergenic	C11orf24
cluster_1	chr11_68297495_68298281	13.6457771714852	6.91104197529959	5.41562359091577	5.97174422130308	0.942613800996799	Distal Intergenic	LRP5
cluster_1	chr11_68342181_68343191	15.9166740027741	4.90169888818758	2.84312074596398	6.46558062773831	0.778473137291879	Intron (ENST00000294304.12/4041, intron 1 of 22)	LRP5
cluster_1	chr11_68446939_68447651	16.1562221558667	6.07832071951491	4.94256073295318	5.10236199453882	0.967522780039607	Promoter (<=1kb)	LRP5
cluster_1	chr11_68684341_68685429	11.2033457589833	7.46042402745418	4.5514196136951	4.49903639899181	0.762602256359213	Promoter (<=1kb)	GAL
cluster_1	chr11_68694466_68695294	21.628166690208	0.394081510788785	0.738473621087745	2.03981786304756	0.868609286523852	Distal Intergenic	GAL
cluster_1	chr11_68749854_68751925	25.934021259277	9.03845175029951	8.10966643028979	4.44573982172145	0.915642467802194	Promoter (<=1kb)	TESMIN
cluster_1	chr11_68854531_68855857	9.27782515948153	5.84136229331904	3.41439321961939	3.35200656951202	0.780422540859105	Distal Intergenic	CPT1A
cluster_1	chr11_69044129_69044648	19.0635332949934	9.54924588090181	7.19173740291782	5.37048502620221	0.890484540080286	Distal Intergenic	TPCN2
cluster_1	chr11_69249609_69250593	9.6022824524383	5.37226372091635	2.22083661056152	2.97306163799023	0.779380826977661	Distal Intergenic	MYEOV
cluster_1	chr11_69434468_69435008	16.6299416600515	6.25685149285067	3.82130258642231	2.39279237292734	0.919067406574238	Distal Intergenic	LINC02953
cluster_1	chr11_69436986_69437581	20.2112568218634	13.3598626636485	5.96165087015061	9.4276146498462	0.692936420800337	Distal Intergenic	LINC02953
cluster_1	chr11_69476015_69477060	10.2934170883031	3.57625769317105	1.45715892483374	1.33543076912547	0.920975029769948	Promoter (2-3kb)	LINC02747
cluster_1	chr11_69521224_69521988	30.6807215227408	3.82490228503821	1.77095163658082	0.952065308039072	0.972106910718948	Distal Intergenic	LINC01488
cluster_1	chr11_69638088_69638586	34.9194798820751	16.6380208836175	13.0769337126896	11.7602121472721	0.961160996551927	Promoter (2-3kb)	CCND1
cluster_1	chr11_69685761_69686320	14.3259876910621	9.19550176198449	8.89655308558091	2.89016456982269	0.583132277814296	Distal Intergenic	LTO1
cluster_1	chr11_69700542_69701116	36.6422044848676	7.88537133460967	8.51403199254073	13.7756740741428	0.778700376788715	Promoter (2-3kb)	FGF19
cluster_1	chr11_69703748_69704971	27.0199831750171	14.9970206454295	12.6741581364011	5.15015976611618	0.719637087933942	Promoter (<=1kb)	FGF19
cluster_1	chr11_69775082_69775951	11.3121860165556	6.56648419074288	3.61883117997998	1.40033391542019	0.713278764524924	Promoter (<=1kb)	FGF4
cluster_1	chr11_69984428_69985225	12.0934042501273	4.1314785986768	3.11941260205627	2.46972933883373	0.977612952959557	Promoter (<=1kb)	ANO1
cluster_1	chr11_70128383_70129205	10.5537613503236	3.33132321581846	2.67187921347547	1.66747578591952	0.955384277501253	Intron (ENST00000531349.6/55107, intron 12 of 27)	ANO1
cluster_1	chr11_70312390_70313319	12.0754919167946	3.91884214060313	1.51437491220227	1.99995617346473	0.930843686172826	Intron (ENST00000253925.12/8500, intron 2 of 27)	PPFIA1
cluster_1	chr11_705828_706750	15.5626352365715	7.90300369632714	5.78199048188561	11.4239645727616	0.562466250905119	Promoter (<=1kb)	DEAF1
cluster_1	chr11_70647072_70647921	19.9622041238726	1.83226677458169	1.05967946113367	1.34084306677194	0.93495971037052	Exon (ENST00000429268.1/ENST00000429268.1, exon 2 of 2)	SHANK2
cluster_1	chr11_70713845_70714382	22.3362392322059	4.42183691900728	3.90009764264714	1.68926311788991	0.950992096261197	Intron (ENST00000601538.6/22941, intron 14 of 25)	SHANK2
cluster_1	chr11_70814816_70815563	14.4216851802464	3.82798504202009	1.9143068390038	3.85585678605704	0.879901785098645	Intron (ENST00000601538.6/22941, intron 12 of 25)	SHANK2
cluster_1	chr11_70872914_70873704	11.2127194060039	1.78158113301768	1.07547685081303	1.56003811761109	0.931882557416006	Promoter (<=1kb)	SHANK2
cluster_1	chr11_71245889_71246910	30.1663812735978	3.19213463324876	1.20232504808854	2.05747125315946	0.943110582653147	Intron (ENST00000601538.6/22941, intron 1 of 25)	SHANK2
cluster_1	chr11_720533_721250	19.0908295608755	6.89407209617763	6.20456484155499	2.86311199280373	0.885193866199485	Promoter (<=1kb)	EPS8L2
cluster_1	chr11_72091189_72091733	18.640849869234	11.5743221443019	10.3350541199914	4.43296074286394	0.658459599321611	Promoter (2-3kb)	LRRC51
cluster_1	chr11_72237970_72238799	28.1984246089406	14.5324052990361	9.09592722321045	8.53028625389548	0.881300250685551	Promoter (<=1kb)	INPPL1
cluster_1	chr11_72239471_72240245	14.4033374822879	12.7710455411743	6.19920727618077	7.90993546834431	0.539592231495715	Promoter (1-2kb)	INPPL1
cluster_1	chr11_72243982_72245215	23.3547633154315	8.30802093091831	6.26746455201834	3.76051220054182	0.935533575294129	Promoter (<=1kb)	PHOX2A
cluster_1	chr11_72333591_72334219	9.97410693760719	4.51640207491488	2.67254337525205	3.43647624357904	0.899633307888498	Promoter (<=1kb)	CLPB
cluster_1	chr11_72417682_72418391	28.7679470209534	1.99254840445645	1.57579135805156	1.35365413604148	0.929628073139866	Intron (ENST00000294053.9/81570, intron 2 of 16)	CLPB
cluster_1	chr11_72584017_72585023	13.9573631649359	3.63086180524418	2.54615565242795	1.26894824995039	0.962058805815037	Promoter (<=1kb)	PDE2A-AS2
cluster_1	chr11_72589748_72590762	16.9862010684361	12.8263308398117	11.006961609589	5.66027786510452	0.574019382680374	Promoter (<=1kb)	PDE2A
cluster_1	chr11_72740920_72741704	10.1861526492142	6.285302425932	1.70550663204692	4.72690486970714	0.644733572614652	Intron (ENST00000393609.8/116985, intron 1 of 34)	ARAP1
cluster_1	chr11_72764365_72765011	23.7144436734539	3.36029465344986	1.37140715687172	1.95658068690457	0.955526210035247	Intron (ENST00000359373.9/116985, intron 1 of 33)	STARD10
cluster_1	chr11_72787154_72787880	21.8912948365686	5.82391777363812	2.01723468772693	2.0747791576495	0.956844113029312	Promoter (1-2kb)	STARD10
cluster_1	chr11_73200179_73200931	13.857083200763	5.07497244623011	3.53429956813561	3.74641189286449	0.970401132647849	Distal Intergenic	IUR1
cluster_1	chr11_73227710_73228340	13.0225382928332	3.12337186771293	1.82791068028915	3.32907920286775	0.887041045044918	5' UTR	P2RY2
cluster_1	chr11_73361767_73362715	38.6351231190461	6.16402160554656	3.85869613550887	2.65136047079662	0.971346528839905	Promoter (1-2kb)	ARHGEF17
cluster_1	chr11_73660761_73661820	27.8169154951826	13.217989599417	11.6994731098844	9.19664356096844	0.937966095076183	Promoter (<=1kb)	PLEKHB1
cluster_1	chr11_7415075_7416149	6.10231371466792	0.936586640238451	1.94858271757548	2.16400116202227	0.733145540170676	3' UTR	SYT9-AS1
cluster_1	chr11_74311198_74311988	19.3435324211501	9.60409369506685	9.23598486508005	10.8891861551017	0.827419584237478	Promoter (<=1kb)	P4HA3-AS1
cluster_1	chr11_743615_744569	30.4050544369556	1.68716876101342	0.839108846567862	1.98363173297325	0.913117228768979	Promoter (2-3kb)	TALDO1
cluster_1	chr11_74388646_74389347	11.4157553232408	1.6885107469597	3.85367748449893	6.04622545923457	0.601325228959708	Intron (ENST00000298198.5/283209, intron 1 of 13)	PGM2L1
cluster_1	chr11_74849350_74850222	16.0068411364268	2.71046219135064	2.74312056757521	2.22199124516502	0.929563320955123	Promoter (1-2kb)	XRRA1
cluster_1	chr11_75204869_75205326	18.8621170460518	6.31359746543334	4.56544777014438	8.56647524033377	0.766975500687698	3' UTR	SLCO2B1
cluster_1	chr11_75280149_75280675	18.6717075380818	6.42914678435679	5.52694966715632	7.8082904711762	0.835224022983387	Promoter (1-2kb)	ARRB1
cluster_1	chr11_75331223_75332136	6.78660148666839	2.13819741027396	0.920890160010398	1.50940404508544	0.918788879213506	Intron (ENST00000420843.7/408, intron 1 of 15)	MIR326
cluster_1	chr11_75425332_75425909	18.3314862633901	3.49799860191454	2.53536445480163	2.06787441170718	0.96703121808319	Promoter (<=1kb)	KLHL35
cluster_1	chr11_75475289_75476018	10.7325335633399	7.79103746412221	3.27944000294145	2.47746212489049	0.630960271714157	Promoter (1-2kb)	GDPD5
cluster_1	chr11_7548272_7549344	10.3709986714182	2.40378431415883	2.52317470399491	4.73565299604272	0.713344427985414	5' UTR	PPFIBP2
cluster_1	chr11_75495936_75496713	8.97407728712088	5.08622737619588	2.59050861517419	3.11221569785753	0.807914463558677	Intron (ENST00000336898.8/81544, intron 1 of 16)	GDPD5
cluster_1	chr11_75706182_75706780	10.4045669338082	6.5359744058969	3.22459526917735	3.85293783915158	0.753402761220586	Distal Intergenic	MOGAT2
cluster_1	chr11_76152113_76152987	12.6822564672607	6.33051971242248	4.83702900865406	5.88308074163769	0.899954963654726	Distal Intergenic	UVRAG
cluster_1	chr11_76243086_76243887	13.5301559579083	9.52935176828195	6.37268008900147	3.90911332989509	0.664393449347504	Distal Intergenic	LINC02761
cluster_1	chr11_762496_763630	13.6850779734747	2.26523696208874	1.24281401617774	2.55762312962558	0.895971985112337	Promoter (<=1kb)	TALDO1
cluster_1	chr11_76455267_76456129	21.6369857663165	17.6105764128369	13.7161229401794	5.57898363753454	0.511789603724535	Intron (ENST00000427574.6/56946, intron 5 of 9)	EMSY
cluster_1	chr11_76704091_76704716	18.8707048457623	1.78843476938845	2.07915627688178	2.08100055811883	0.903082427314423	Promoter (<=1kb)	GUCY2EP
cluster_1	chr11_7673051_7674584	19.3548965807066	10.9123739180442	8.11971822391301	4.77975558791552	0.784487960212836	Promoter (<=1kb)	CYB5R2
cluster_1	chr11_76758984_76759643	14.1185551263893	4.38498693306643	8.16656495643804	3.3136604480653	0.661193885186647	Distal Intergenic	TSKU
cluster_1	chr11_77039492_77040271	11.0110404498889	3.74759228344866	2.60165628257616	2.5505521854714	0.980851551678684	Exon (ENST00000528622.5/192134, exon 3 of 3)	B3GNT6
cluster_1	chr11_77091027_77091628	12.9736658409265	4.58410153453961	4.17328287363161	6.79632674365873	0.726283891101046	Intron (ENST00000531028.2/726, intron 2 of 13)	CAPN5
cluster_1	chr11_77140117_77140798	13.3350422563128	5.38440944027446	3.69875193352924	3.58254361679668	0.966109570724383	Promoter (1-2kb)	MYO7A
cluster_1	chr11_77147556_77148539	19.5981283914442	13.5789510452447	8.73333419039544	6.39708262724201	0.700985081903538	Exon (ENST00000409709.9/4647, exon 4 of 49)	MYO7A
cluster_1	chr11_77175699_77176276	14.7796396765633	5.80941848326769	2.70363179008172	2.24644927148528	0.901062191322321	Promoter (<=1kb)	MYO7A
cluster_1	chr11_77191855_77192447	26.2946900967533	2.9264997243146	2.35719924681201	3.15785250528619	0.913135842263107	Exon (ENST00000409709.9/4647, exon 31 of 49)	MYO7A
cluster_1	chr11_77411301_77412380	22.3376135937165	12.2717397467566	8.52940688406555	15.1352226147276	0.632777375070217	Promoter (<=1kb)	PAK1
cluster_1	chr11_77547567_77548687	11.0404175293945	2.48357863335823	2.86494636576804	2.91080588050702	0.879806716761021	Intron (ENST00000526761.5/1207, intron 4 of 5)	AQP11
cluster_1	chr11_78022339_78023607	21.1874995808397	5.25126265788012	3.32063064222686	7.93761586897683	0.780402743475057	Promoter (<=1kb)	KCTD14
cluster_1	chr11_783196_784043	38.283593195788	15.9195458071408	13.5311214001286	16.4577412980912	0.892459922216518	Exon (ENST00000530083.3/171391, exon 2 of 2)	GATD1-DT
cluster_1	chr11_78594732_78595678	12.4939965804119	1.14858464117579	0.906460781388246	1.35725580410422	0.907930420922499	Distal Intergenic	NARS2
cluster_1	chr11_78940382_78940990	20.2299580188741	7.3959487774572	5.09539713009296	2.68041076694642	0.913377737092445	Intron (ENST00000278550.12/26011, intron 6 of 33)	TENM4
cluster_1	chr11_790650_791330	28.0801043287301	16.2068284273923	9.38892029095747	7.24155077190482	0.789336648927986	Promoter (<=1kb)	CEND1
cluster_1	chr11_79269558_79270333	6.88743841004246	2.89040283973459	1.50563093479272	1.9441057949723	0.904996457762941	Promoter (<=1kb)	TENM4
cluster_1	chr11_79375626_79376339	9.59717686175803	4.24203641884046	1.83244948909225	2.8532193960849	0.857891370545529	Intron (ENST00000278550.12/26011, intron 1 of 33)	MIR708
cluster_1	chr11_79472756_79473730	22.3248212073965	6.87063619484035	8.43057167500949	3.93758373098199	0.848115345640925	Distal Intergenic	TENM4
cluster_1	chr11_79485621_79486688	13.218954320977	1.99059641581969	3.2084392456023	2.96444639491207	0.841240311711777	Distal Intergenic	TENM4
cluster_1	chr11_79493420_79494096	16.6946492558258	3.56563888493422	3.82609854352511	6.76915556418233	0.749546889665034	Distal Intergenic	TENM4
cluster_1	chr11_8054984_8055953	4.93045153178913	2.2471732293156	1.04963697461616	2.68488031147222	0.673981387468511	Intron (ENST00000534099.5/7275, intron 1 of 11)	TUB-AS1
cluster_1	chr11_8071955_8072749	11.6750901110092	5.27914402759554	3.68874861391598	2.62840291883509	0.901653394070063	Intron (ENST00000534099.5/7275, intron 1 of 11)	TUB
cluster_1	chr11_8218861_8219709	9.79171619850876	2.30315315545513	1.87171602019944	1.70287534624575	0.960488660535936	Distal Intergenic	LMO1
cluster_1	chr11_827151_828001	22.0918179992965	16.213978653405	12.8929347453435	7.37657683782545	0.62492923778366	Promoter (<=1kb)	CRACR2B
cluster_1	chr11_8357522_8358194	9.91296732224031	4.82355384217177	2.38049377280531	1.32778964526929	0.809586642133451	Distal Intergenic	LMO1
cluster_1	chr11_83587570_83588314	11.1664799810953	3.69572148669347	1.98131192789487	1.19529934285454	0.934725400533577	Intron (ENST00000280241.12/1740, intron 13 of 21)	DLG2-AS2
cluster_1	chr11_83723946_83725494	10.2003644002634	4.19140271973186	3.00766349241238	4.86385210108289	0.796046675952661	Promoter (<=1kb)	DLG2
cluster_1	chr11_84437025_84438247	18.6193764001052	4.93038240387994	4.33194404948474	4.02880577776044	0.952692057607256	Promoter (<=1kb)	DLG2
cluster_1	chr11_84673709_84674392	5.61627200771267	0.67638298701353	0.542537723697281	1.65473362465423	0.778971892338607	Intron (ENST00000398309.6/1740, intron 1 of 22)	DLG2
cluster_1	chr11_84719797_84721381	14.2216243202062	6.56906914068481	5.77306170400695	3.89734899294201	0.897828402534684	Promoter (<=1kb)	DLG2
cluster_1	chr11_850422_851110	18.4401214855622	11.3922357969834	9.60213827720455	3.77665744018943	0.659295753163441	Promoter (<=1kb)	TSPAN4
cluster_1	chr11_86571385_86572036	21.8134036748719	3.47240046344235	2.68096049114307	1.7093588516407	0.960816111105417	Intron (ENST00000524610.1/ENST00000524610.1, intron 2 of 2)	ME3
cluster_1	chr11_86923962_86924755	16.9219701005152	0.915881175481841	0.530847386842223	1.49062605324634	0.897090679356824	Promoter (<=1kb)	LOC107984428
cluster_1	chr11_8698694_8699420	16.0290002669037	3.99395289246495	1.92315423628802	2.63418221226362	0.955490156603251	Promoter (<=1kb)	DENND2B
cluster_1	chr11_8700973_8701658	19.0450914803808	2.03855185713499	2.82768257526943	3.12615316792374	0.871954782173532	Promoter (<=1kb)	DENND2B
cluster_1	chr11_87352641_87353326	14.8458516108234	6.76841263075948	6.48314203886936	7.69610334791859	0.840587155946335	Distal Intergenic	TMEM135
cluster_1	chr11_87623286_87624183	13.7164640667792	3.45191636106267	2.76093131318519	2.69260699448215	0.959308061072305	Distal Intergenic	LINC02711
cluster_1	chr11_877535_878210	18.8821534380618	3.35617116277608	2.95826634842301	2.62515744202444	0.94158151441743	Intron (ENST00000323578.13/66005, intron 10 of 12)	CHID1
cluster_1	chr11_88103383_88104197	14.4217368903737	3.52246720039961	0.668252277999787	1.62924139874385	0.933764051105089	Intron (ENST00000528458.1/ENST00000528458.1, intron 1 of 2)	RAB38
cluster_1	chr11_88300974_88301830	19.8495801770953	4.003784659274	1.39428067052098	1.99260905908805	0.965399458154701	Intron (ENST00000678554.1/1075, intron 4 of 7)	CTSC
cluster_1	chr11_88307969_88309067	32.4291663957799	1.83788752777261	0.84347570571621	0.482247677226841	0.941935676347043	Promoter (<=1kb)	CTSC
cluster_1	chr11_88508357_88509691	14.1790088707358	5.47293091807681	4.86383590407236	2.68221081021233	0.897480125142003	Promoter (2-3kb)	GRM5-AS1
cluster_1	chr11_89062827_89063767	7.9373585207997	4.05503673402001	3.84872821931256	1.26067913910802	0.709127296935084	Promoter (<=1kb)	GRM5
cluster_1	chr11_89065342_89066304	11.0881266753579	5.83523471168741	4.9433028065728	2.06882287042946	0.749150966748209	Promoter (<=1kb)	GRM5
cluster_1	chr11_89293913_89294895	13.3176324542007	3.35637300524354	2.92374201480325	0.74185266096834	0.913967582794337	Exon (ENST00000532876.1/ENST00000532876.1, exon 1 of 1)	TYR
cluster_1	chr11_90240041_90240916	22.1704450334654	10.3890058346708	9.15341142064737	4.30225658972808	0.811843902602955	Distal Intergenic	DISC1FP1
cluster_1	chr11_9120722_9121743	13.1098894246849	2.58720437323007	1.68344728708668	1.79468181425994	0.960118437788128	Intron (ENST00000534295.1/57758, intron 2 of 3)	SCUBE2
cluster_1	chr11_9137580_9138371	19.2575657141859	8.52497993549787	8.08541400444328	8.15726367896722	0.938499298289453	Promoter (<=1kb)	SCUBE2
cluster_1	chr11_92311592_92312427	35.128528926157	1.4976431467316	0.651473092826801	1.41295523742297	0.920282019875691	Intron (ENST00000525166.6/120114, intron 1 of 27)	FAT3
cluster_1	chr11_92440420_92441395	9.0430902259548	2.34767763516018	2.27373705671363	1.12839158636754	0.930329165044971	Intron (ENST00000525166.6/120114, intron 2 of 27)	FAT3
cluster_1	chr11_93072097_93073380	12.7658122741237	0.662721836750016	0.489492380270605	2.00151264672782	0.845876022966406	Distal Intergenic	SLC36A4
cluster_1	chr11_93089324_93089927	12.8950537858735	5.24364804252593	3.56170629071921	2.65836016388249	0.933270400758764	Distal Intergenic	SLC36A4
cluster_1	chr11_93116562_93117522	19.635931018117	2.53266982787355	1.33431583260489	2.17583586496165	0.930794160808426	Distal Intergenic	SLC36A4
cluster_1	chr11_934229_935118	11.3398002397308	3.49384311091795	4.80451736799781	4.51418722174731	0.797818160010789	Promoter (<=1kb)	AP2A2
cluster_1	chr11_93444390_93445205	14.6444160155646	10.4432764291942	7.86524779490508	3.17313997718278	0.596029542807907	Distal Intergenic	DEUP1
cluster_1	chr11_93477548_93478532	12.6623949642593	9.04169246561202	6.864851007313	3.37609552740285	0.619387933039067	3' UTR	SMCO4
cluster_1	chr11_94119599_94120628	16.2524815519928	1.27417646896313	2.14435709670668	1.28125765424009	0.895337223619303	Distal Intergenic	PANX1
cluster_1	chr11_94649843_94650430	23.8991657932399	2.12393971216816	1.17829953518272	2.04029848039069	0.921817139304106	Promoter (2-3kb)	LINC02700
cluster_1	chr11_94734410_94735304	17.9618715868131	3.24415752022984	4.21771270188379	1.64134967158104	0.896695166693348	Intron (ENST00000299004.13/154810, intron 2 of 4)	PIWIL4-AS1
cluster_1	chr11_95150847_95151964	37.0799297280498	16.3989211323611	16.8486985099699	9.04482729550721	0.828296401968532	Promoter (<=1kb)	LOC100129203
cluster_1	chr11_95255408_95256252	8.04246106985889	3.01234193504167	1.65689154250295	2.58247498460757	0.889800290314042	Distal Intergenic	LOC100129203
cluster_1	chr11_9601106_9601947	9.18234902109064	3.81639287624246	2.15658500093578	3.27895984430609	0.875513011761717	Distal Intergenic	WEE1
cluster_1	chr11_9607037_9607898	17.2903899024814	1.91838802748374	1.00961623541704	2.4058211116637	0.897464170248373	Distal Intergenic	WEE1
cluster_1	chr11_9626776_9627511	18.7424035673447	7.67785493224487	4.85314582228717	1.58306746840075	0.841321593417063	Distal Intergenic	SWAP70
cluster_1	chr11_9905480_9906488	11.3264668914174	3.06283244578745	2.50660142306654	2.29827543849636	0.96630037798413	Intron (ENST00000533659.1/101928008, intron 1 of 2)	SBF2
cluster_1	chr11_9922647_9923338	32.0785893646084	2.96650135511845	1.90467195791137	2.54721324749054	0.927702236698755	Intron (ENST00000533659.1/101928008, intron 2 of 2)	SBF2
cluster_1	chr12_100154652_100155203	20.2645860668219	2.48963282793504	2.50016187097923	1.28985578163724	0.93796190567828	Distal Intergenic	GOLGA2P5
cluster_1	chr12_100715934_100717867	16.0213857295142	7.93136156858775	6.8608349967119	8.8436082729208	0.818627723042557	Promoter (<=1kb)	ANO4
cluster_1	chr12_100926573_100927191	15.4285387825702	5.46560664386111	3.66096670936853	2.29043562026859	0.938231478027258	Intron (ENST00000549155.6/121601, intron 5 of 10)	ANO4
cluster_1	chr12_100987721_100988561	12.8444253575054	4.59971830736469	3.38453692970104	2.82946397342441	0.978565207396312	Promoter (<=1kb)	ANO4
cluster_1	chr12_101642271_101642865	13.8141392886892	3.27075892112987	3.15482587719323	2.66746347870924	0.940480233040278	Exon (ENST00000550514.5/4604, exon 7 of 7)	LOC105369937
cluster_1	chr12_102824202_102824976	10.8853096178121	6.54341146685682	7.76834068146327	3.16933348431972	0.572345580383256	Promoter (<=1kb)	LINC00485
cluster_1	chr12_102916907_102917921	24.7212859138636	3.01724400235475	3.19615564062916	1.75226007265847	0.932793758137548	Promoter (<=1kb)	PAH
cluster_1	chr12_103301678_103302693	19.5023061613946	13.4912403610208	11.5308846125882	2.4245155055849	0.543478156798783	3' UTR	C12orf42
cluster_1	chr12_103575281_103575960	13.9145022186441	5.76514464869772	6.3761273881688	6.64478714201139	0.840676006804777	Intron (ENST00000654623.1/101929084, intron 6 of 6)	STAB2
cluster_1	chr12_10361046_10361466	17.0952431641594	1.98503438124592	2.20930822680314	3.72665603811468	0.843378242879061	Promoter (<=1kb)	LINC02598
cluster_1	chr12_104171750_104172887	11.2670193993718	1.1674640343581	0.702389404380197	1.34403323886589	0.908368208162541	Promoter (1-2kb)	LINC02385
cluster_1	chr12_104215506_104216370	21.9972488760996	9.18012697351643	7.00578503186188	4.81887859656918	0.925092899556836	Promoter (<=1kb)	TXNRD1
cluster_1	chr12_104381637_104382450	13.3098989187653	4.79418207597503	4.89828358625745	4.30714149358416	0.930741620856558	Distal Intergenic	TXNRD1
cluster_1	chr12_104506713_104507803	5.36455169688172	1.02328706356374	1.84352450002666	3.52191085520182	0.530721883124013	Intron (ENST00000303694.6/50515, intron 1 of 2)	CHST11
cluster_1	chr12_104526308_104527093	13.5839008341952	4.63003223098029	1.84329189288623	1.64363995996515	0.922197109501466	Intron (ENST00000303694.6/50515, intron 1 of 2)	CHST11
cluster_1	chr12_104605283_104606075	14.1188712239797	2.73858762945202	4.47513979774288	4.81854085331123	0.777104328177917	Intron (ENST00000303694.6/50515, intron 2 of 2)	MIR3922
cluster_1	chr12_104704105_104704947	10.3662797066767	5.50757037367918	5.68380874407793	2.25149041325619	0.691973508932732	Intron (ENST00000303694.6/50515, intron 2 of 2)	NA
cluster_1	chr12_104788802_104789417	17.2758662217917	3.03758303175017	4.08430168495085	1.8280312269341	0.894714881103875	Distal Intergenic	SLC41A2
cluster_1	chr12_105092120_105093057	21.1522482479694	2.85879257454919	2.29885592223262	1.51228276971515	0.951620744291277	Intron (ENST00000652515.1/160428, intron 1 of 22)	ALDH1L2
cluster_1	chr12_10673793_10674652	18.9504157481652	4.55687634624584	2.59566403512011	5.88131312337794	0.832781859434569	Promoter (<=1kb)	STYK1
cluster_1	chr12_107634587_107635769	12.7169597684854	4.63350332709406	2.10976634446089	2.9450345889756	0.91658441400912	Promoter (<=1kb)	ABTB3
cluster_1	chr12_107775058_107775874	15.084923178243	9.57543319253678	9.65437938105887	3.07888273111047	0.5750127587401	Promoter (<=1kb)	ASCL4
cluster_1	chr12_107912293_107913158	16.1366609768437	8.12969161851332	8.13311638547716	3.31781992265743	0.73149019091302	Exon (ENST00000547829.1/ENST00000547829.1, exon 1 of 1)	LOC728739
cluster_1	chr12_108112621_108113672	12.5366722872869	4.20106984602334	3.36483085253037	7.10890517982992	0.657239503558945	Distal Intergenic	WSCD2
cluster_1	chr12_108316052_108316960	16.1174060342362	2.27631867778892	1.81083409193138	2.66733637687656	0.901915362682193	Promoter (<=1kb)	CMKLR1
cluster_1	chr12_108441601_108442629	14.0619411535327	1.65655588609323	0.996104497627198	0.333781519288889	0.966015938786694	Exon (ENST00000502160.6/102723562, exon 16 of 18)	LINC01498
cluster_1	chr12_108456978_108458024	9.89140852407944	3.25764908863058	1.84537345984895	2.2374821066	0.953175253174571	Exon (ENST00000502160.6/102723562, exon 10 of 18)	LINC01498
cluster_1	chr12_108768445_108769158	13.7051301731916	6.65042106151604	3.82960045119493	3.64266325542955	0.883207340732899	Distal Intergenic	CORO1C
cluster_1	chr12_109069258_109070504	16.4696531483308	6.39171420182573	4.69400420874622	2.45111938301843	0.898313196729805	Promoter (1-2kb)	USP30
cluster_1	chr12_109458557_109459416	19.2454021289101	3.52820458529438	0.713916656231092	1.54735090700195	0.958541995940168	Promoter (<=1kb)	KCTD10
cluster_1	chr12_109832955_109833703	12.8320012613775	6.62667714280447	2.76373606780253	6.80018036474381	0.678114698774061	Promoter (<=1kb)	MIR4497
cluster_1	chr12_109845148_109845738	15.7778171801795	10.8428224911019	5.97772202493434	6.19574060902997	0.722323334479602	Distal Intergenic	TRPV4
cluster_1	chr12_109944931_109945522	21.641237710285	12.2895623030154	10.5170465119771	4.9369764581562	0.729801888637436	Promoter (1-2kb)	GIT2
cluster_1	chr12_110244795_110245836	12.4214748633357	2.22155256929187	1.2237185968083	0.896294154631242	0.980524430985078	Distal Intergenic	ATP2A2
cluster_1	chr12_110688647_110690160	22.2957001657309	14.1685607695506	8.90370099556219	6.28986006581984	0.740745771801738	Promoter (<=1kb)	HVCN1
cluster_1	chr12_110698193_110698824	17.6228222516409	7.83828677955163	2.86405816184867	3.16522049802203	0.84816822434918	Intron (ENST00000546713.5/84329, intron 2 of 4)	HVCN1
cluster_1	chr12_110826574_110827199	13.7415583339857	11.2041015656027	4.7188570320736	4.21892520388178	0.576496656091807	Distal Intergenic	CCDC63
cluster_1	chr12_110846493_110847397	19.1793695511964	13.397405879761	7.56238360357843	5.98787356966206	0.687783398945797	Promoter (<=1kb)	CCDC63
cluster_1	chr12_110894239_110894975	12.6294393288348	6.05425725021977	4.62713943040877	3.36018441536735	0.899853016972793	Intron (ENST00000545036.5/160762, intron 8 of 10)	MYL2
cluster_1	chr12_110936837_110937706	28.3025991179181	4.12679427830757	2.51839769711864	1.78834719592031	0.967445679135772	Promoter (<=1kb)	LINC01405
cluster_1	chr12_111412073_111412711	13.7458940004543	6.481241170836	4.79086509169957	7.2501312209978	0.786245659081703	Intron (ENST00000341259.7/10019, intron 1 of 7)	SH2B3
cluster_1	chr12_111868593_111870078	8.65489230459389	3.94968016628634	4.4440699767907	2.34582874288614	0.784131353183727	Exon (ENST00000550735.7/8550, exon 5 of 14)	MAPKAPK5
cluster_1	chr12_112577777_112578603	14.9119910782625	6.95894520740581	6.53696729039633	1.80968555747319	0.735395716961107	Promoter (2-3kb)	RPH3A
cluster_1	chr12_112616621_112617508	16.2069200524774	1.63353721179658	1.26600660432351	2.21745128362581	0.89438555230796	Intron (ENST00000549736.5/22895, intron 1 of 6)	RPH3A
cluster_1	chr12_112777298_112778141	21.9408236815961	8.29814349780285	7.63193212670936	0.974080997635331	0.779168432552168	Intron (ENST00000549736.5/22895, intron 3 of 6)	RPH3A
cluster_1	chr12_112791345_112792462	4.85923213010015	2.80565641835427	3.57319852208148	0.789213198778514	0.51359396935415	Promoter (<=1kb)	RPH3A
cluster_1	chr12_113065086_113065776	15.0567476273743	8.85755621577987	5.72072627597781	3.08201749515667	0.742225203298465	Intron (ENST00000548759.2/1840, intron 2 of 9)	DTX1
cluster_1	chr12_113092737_113093724	30.8519016213376	6.98580927584576	5.33053495122077	2.62427520145481	0.964682765545512	Promoter (<=1kb)	DTX1
cluster_1	chr12_113103705_113104552	18.4238816632542	4.89185202397148	3.67060503419582	1.78055983440803	0.955115395978199	Promoter (<=1kb)	RASAL1
cluster_1	chr12_113135472_113136334	24.5503605401775	8.29685387115605	3.41146004783111	2.51475076953828	0.920112886606432	Promoter (<=1kb)	RASAL1
cluster_1	chr12_113152678_113153613	22.2237522784978	10.6793153483219	7.71042315336117	7.20850405997529	0.942366322711672	Promoter (<=1kb)	CFAP73
cluster_1	chr12_113154316_113155059	23.0391064888282	8.81108531961468	5.59199223913687	4.60022995687725	0.948895801484999	Promoter (1-2kb)	CFAP73
cluster_1	chr12_113232839_113233772	20.3461725635404	3.62799749338104	2.14057684468324	5.82674520403531	0.817179300590517	Intron (ENST00000552642.5/53373, intron 1 of 3)	TPCN1
cluster_1	chr12_113245477_113246739	20.2591124614431	8.23690352411896	6.47732737931962	6.07157275858405	0.984877718741846	Promoter (<=1kb)	TPCN1
cluster_1	chr12_113348800_113349776	7.80451310702944	3.38516757667666	2.05291004260596	1.64281096462206	0.908914770064402	Intron (ENST00000549372.1/80024, intron 1 of 2)	PLBD2
cluster_1	chr12_113392882_113393489	22.4436010229666	2.48642022146886	0.400652024016099	2.31670947414073	0.916033347148822	3' UTR	SDS
cluster_1	chr12_113425440_113426406	19.2999266046556	3.49334725759335	2.165380084466	1.52059249462589	0.977436674918858	Promoter (<=1kb)	SDS
cluster_1	chr12_113472245_113472619	22.4545243456898	16.2237422550205	8.97152615820323	2.36503495607696	0.586296854467518	Promoter (<=1kb)	LHX5-AS1
cluster_1	chr12_113477290_113477937	22.0215947152673	12.8194873495484	5.90196877261945	2.37571497020111	0.710070027209379	Promoter (<=1kb)	LHX5-AS1
cluster_1	chr12_114186478_114187220	12.3238264378829	3.87889604848132	1.30515820766608	2.26774907169175	0.915569957026492	Distal Intergenic	LINC02459
cluster_1	chr12_114668035_114668878	22.7489218935382	9.55490786725723	10.738865016745	10.3652912537674	0.859610982944143	Distal Intergenic	TBX3
cluster_1	chr12_114697988_114699142	12.6480945852254	4.82559517572124	3.01372120605414	2.20662991572509	0.934656250000926	Intron (ENST00000660721.1/107984437, intron 1 of 1)	TBX3
cluster_1	chr12_115916914_115917813	11.6226362065719	4.07122884863126	4.37310458148801	3.03528963054505	0.90932073662927	Distal Intergenic	LINC02463
cluster_1	chr12_11608904_11609547	24.5514276118235	1.18553032934646	0.774528743895891	1.30585093616856	0.91529822648952	Distal Intergenic	ETV6
cluster_1	chr12_116426945_116427902	22.32679144518	8.9292385013639	4.46599423126502	3.35006599837041	0.898351150740214	Promoter (<=1kb)	MIR4472-2
cluster_1	chr12_117009665_117010539	9.48701226717006	4.87514112019237	3.91997240681636	0.968346805617638	0.714141440510614	Exon (ENST00000652555.1/26259, exon 8 of 11)	LOC100506551
cluster_1	chr12_117052446_117053467	10.8741214027635	6.70972958222295	6.60831677607878	3.18579215677454	0.659832480170478	Promoter (<=1kb)	TESC
cluster_1	chr12_117111364_117112244	12.8730120992154	2.9572167728459	1.84805367439972	3.70208523100798	0.853338547018711	Intron (ENST00000547006.1/101928244, intron 2 of 2)	TESC-AS1
cluster_1	chr12_117155113_117155958	39.9952599367836	5.29561199446864	3.67597230198839	4.67992672762159	0.929971762902631	Promoter (2-3kb)	FBXO21
cluster_1	chr12_117236398_117237107	14.9851339059674	4.33992003171284	3.72916582458819	4.9144253654433	0.88200818059003	Intron (ENST00000317775.11/4842, intron 20 of 28)	FBXO21
cluster_1	chr12_117580487_117581208	29.8629500517724	16.3724445556704	6.68068692430713	2.95673625194647	0.736004922699362	Intron (ENST00000425217.5/283455, intron 6 of 19)	KSR2
cluster_1	chr12_117628413_117629208	18.5897160699857	7.27757574983061	5.699551180268	2.45683504333779	0.870423021092732	Intron (ENST00000425217.5/283455, intron 5 of 19)	KSR2
cluster_1	chr12_118119512_118120354	20.4934745107997	3.69849947036406	2.0043415769827	2.27261722725713	0.963482611111361	Promoter (<=1kb)	LOC101928274
cluster_1	chr12_118120498_118121457	19.7766302603492	6.41938231445881	4.88456741130964	3.8306895255998	0.979623894173502	Promoter (<=1kb)	LOC101928274
cluster_1	chr12_118773969_118775063	16.4091681328002	8.17594627188042	9.72446493382204	1.88800193563632	0.607957685018824	Promoter (<=1kb)	LINC02440
cluster_1	chr12_118874770_118875528	14.5939578602628	3.7154826932366	2.45964479923618	1.9735114620078	0.985613487522886	Intron (ENST00000544515.1/ENST00000544515.1, intron 2 of 4)	LINC02439
cluster_1	chr12_118979808_118982114	19.3928665218312	15.3836163734801	13.1506028564672	5.52234720862633	0.512901677090114	Promoter (<=1kb)	SRRM4
cluster_1	chr12_119088899_119089883	34.351659674091	2.40241037998436	1.13187723296334	0.946333030653453	0.943709028228771	Intron (ENST00000267260.5/84530, intron 1 of 12)	SRRM4
cluster_1	chr12_119153365_119154879	33.0099758741104	12.6361600534377	8.48246491781483	2.36575838147026	0.851137254953574	Exon (ENST00000267260.5/84530, exon 11 of 13)	HSPB8
cluster_1	chr12_119202052_119202995	20.144158114829	4.70515203563432	2.17602905062114	2.63276544068576	0.968915376375352	Intron (ENST00000541798.1/105370026, intron 2 of 3)	HSPB8
cluster_1	chr12_119593516_119594666	11.5577175529577	5.53249488683811	3.8135950343146	1.91880541075302	0.825915063355521	Promoter (<=1kb)	LOC105370027
cluster_1	chr12_11969625_11970520	10.1738834884532	2.27024156769216	4.4518569229113	1.2619597436422	0.73582776432278	Distal Intergenic	BCL2L14
cluster_1	chr12_120093361_120094489	25.9937041691517	18.5040305267487	12.195330907444	7.64432149380153	0.660484836166724	Promoter (2-3kb)	BICDL1
cluster_1	chr12_120228280_120229443	40.7684706593886	21.6212080073028	20.7329640845401	12.6006588185191	0.808243264922936	Promoter (1-2kb)	PXN
cluster_1	chr12_120388694_120389589	33.6532113545536	20.8458464474932	14.9145052156912	5.86012676867827	0.676601490918285	Exon (ENST00000662509.1/ENST00000662509.1, exon 1 of 3)	MSI1
cluster_1	chr12_120413713_120414605	36.1193237145421	24.9263434418342	19.9988050519059	5.76773009828397	0.575918618451689	Distal Intergenic	COX6A1
cluster_1	chr12_12086498_12087871	9.60246882667069	3.04432667808581	2.06380092299271	1.24417550070398	0.95371844547358	Exon (ENST00000589718.5/79370, exon 4 of 7)	BCL2L14
cluster_1	chr12_120928735_120929652	14.8935331980784	2.19924324787996	1.03881291331149	1.18317625649591	0.962074931482017	Distal Intergenic	XLOC_009911
cluster_1	chr12_120999072_120999912	22.3764924094791	2.52359764055026	1.83465285154623	2.30887098335088	0.925605566828854	Promoter (2-3kb)	HNF1A
cluster_1	chr12_121060012_121060984	10.9362491525271	1.61613391243126	0.647782072396017	1.36059822321115	0.928895067624785	Distal Intergenic	OASL
cluster_1	chr12_121230147_121230775	16.7275894188183	3.51274206302715	2.71960585420219	2.47642536780862	0.960256622233006	Intron (ENST00000359949.11/5025, intron 9 of 12)	P2RX4
cluster_1	chr12_121238452_121239288	15.4988208654296	3.3237199908495	4.10950176362288	3.54864180719934	0.886626040839296	3' UTR	P2RX4
cluster_1	chr12_121443195_121444074	15.9747184376265	6.49224581072162	6.09810727789762	5.42297676940558	0.961998803489328	Promoter (<=1kb)	MIR7107
cluster_1	chr12_121582542_121583185	23.7135216736126	11.6890187822019	6.8791474239601	3.84611652235779	0.818847131791448	Promoter (1-2kb)	KDM2B
cluster_1	chr12_121663695_121664322	40.738105666325	8.93533640897012	5.813578045515	2.25639572288185	0.967626879615538	Intron (ENST00000355329.7/283385, intron 1 of 5)	MORN3
cluster_1	chr12_121671933_121672927	22.6416625702288	6.61024440118345	4.42637505982963	4.90139995175692	0.966392410395024	Promoter (<=1kb)	MORN3
cluster_1	chr12_121811324_121812921	27.5996240670798	22.9706268246815	13.2712536693646	12.3405220901412	0.597144042099579	Intron (ENST00000604567.6/23067, intron 6 of 16)	SETD1B
cluster_1	chr12_122063626_122064610	30.801767956316	17.3336132228256	11.5341296602874	6.00720066679926	0.760375597975997	Promoter (<=1kb)	LINC02985
cluster_1	chr12_122137249_122138169	24.0356152187693	6.32276851295882	2.73578808179367	2.43154979941794	0.969568679538299	Promoter (1-2kb)	MLXIP
cluster_1	chr12_122751232_122751854	17.6976182755639	9.01599714329082	5.98618462584813	2.82384136642728	0.792145620785187	Promoter (<=1kb)	DENR
cluster_1	chr12_122909834_122910589	8.88214977065137	5.87662572940993	2.46411185380845	2.51189936826593	0.695184476633035	Distal Intergenic	VPS37B
cluster_1	chr12_123401906_123402599	16.6835644259385	5.36994135638386	5.7148466312651	2.8120631172818	0.884113007496659	Intron (ENST00000402868.8/387893, intron 5 of 7)	KMT5A
cluster_1	chr12_123761759_123763486	18.454410526437	9.4014971535805	7.94231257058898	6.03977084195901	0.906564761884342	Promoter (<=1kb)	DNAH10
cluster_1	chr12_124500277_124501485	17.4067738720263	10.7878497657707	7.76069138502473	11.8508445126731	0.671748358379537	Intron (ENST00000404621.5/9612, intron 1 of 46)	LOC105370047
cluster_1	chr12_124734148_124735058	18.2177632292174	12.1916855814745	8.62571178805571	4.36194828158903	0.665857807915578	Distal Intergenic	SCARB1
cluster_1	chr12_124992857_124993216	20.9699592141172	13.2322451129215	10.6145821587915	5.91022180588522	0.713523525894536	Promoter (<=1kb)	BRI3BP
cluster_1	chr12_125183203_125183821	22.5069204532818	11.1906619780803	13.493031703127	4.9886126203985	0.657377597453895	Promoter (2-3kb)	TMEM132B
cluster_1	chr12_125236685_125237512	16.2266522100527	2.66537902476009	0.981225445011016	1.7062383224071	0.950439723106595	Intron (ENST00000682704.1/114795, intron 1 of 8)	TMEM132B
cluster_1	chr12_125280429_125281379	20.5387311788907	5.94782638280694	5.187637180536	2.48894789018524	0.931737793528093	Intron (ENST00000682704.1/114795, intron 1 of 8)	TMEM132B
cluster_1	chr12_125329268_125330240	12.2161297983396	7.66562184841947	8.54045007443459	1.57830828722524	0.512800195064175	Promoter (2-3kb)	TMEM132B
cluster_1	chr12_125330801_125331723	16.438587192984	12.7032620904075	8.97775823138868	5.92559800397279	0.619857132756972	Intron (ENST00000682704.1/114795, intron 1 of 8)	TMEM132B
cluster_1	chr12_127455266_127456544	10.1972493922188	3.70130621171838	2.36618055664677	1.63763362960049	0.94128595585791	Exon (ENST00000660421.1/ENST00000660421.1, exon 1 of 2)	LOC105370067
cluster_1	chr12_12915615_12916682	7.6517555738388	3.6655415943585	3.40604918495915	4.10630240774655	0.838672640951318	Promoter (<=1kb)	MIR614
cluster_1	chr12_13028717_13029659	11.4917646699852	4.30446238996552	3.12445800877123	0.835515566677132	0.850004742793291	Intron (ENST00000543321.1/100506314, intron 4 of 4)	FAM234B
cluster_1	chr12_130513962_130514750	16.2221891299294	3.8014379250941	2.48754382106111	3.12009441775698	0.945788895243543	Intron (ENST00000690449.1/23504, intron 3 of 22)	RIMBP2
cluster_1	chr12_130787350_130788946	11.4424537373133	6.99436044018762	6.42773193639124	3.68324672523714	0.725786039019615	Distal Intergenic	STX2
cluster_1	chr12_130818629_130819479	18.2982104030623	5.23449230180957	5.46589722351785	3.34811015242213	0.922927642179586	Intron (ENST00000392373.7/2054, intron 3 of 10)	STX2
cluster_1	chr12_130849587_130850342	15.3614014502429	1.79539885977816	0.750304109601785	1.0940036084131	0.948295813582635	Distal Intergenic	STX2
cluster_1	chr12_130853304_130854075	38.6701750346092	6.45724278823218	3.37781786878242	1.23949083552161	0.981209813360822	Distal Intergenic	STX2
cluster_1	chr12_130870705_130871228	18.2641112624597	6.6535792827838	2.86407407796872	6.48155048687503	0.820157430677681	Promoter (<=1kb)	RAN
cluster_1	chr12_13087772_13089216	13.6663544611286	1.53465045443032	1.78595792543956	1.52429825967986	0.910225949034818	Exon (ENST00000651961.1/83445, exon 3 of 7)	GSG1
cluster_1	chr12_131223730_131224941	34.5090858487827	3.06737604497372	1.45428605039794	8.53425920605294	0.793293604318747	Intron (ENST00000536191.2/116437, intron 3 of 3)	LINC01257
cluster_1	chr12_131380771_131381570	9.88881646543087	7.10109226884061	3.75946753911748	2.22287186687452	0.635653980557818	Distal Intergenic	LINC02370
cluster_1	chr12_131608813_131609669	7.55442265408421	3.53855123151902	2.26300171679567	1.69605918922994	0.885702074882309	Distal Intergenic	LINC02414
cluster_1	chr12_131624636_131625286	15.3471519596893	5.33379730018838	3.33290084903259	4.17182221762298	0.943485662504947	Distal Intergenic	LINC02414
cluster_1	chr12_131681976_131682829	18.8154383595523	6.70815911804946	3.38067974670423	2.93143891061391	0.935800420692635	Distal Intergenic	LINC02414
cluster_1	chr12_131723375_131724010	19.2924834586909	2.35627753120381	2.18176916887462	2.65864581972333	0.907378256773016	Promoter (<=1kb)	SFSWAP
cluster_1	chr12_13179327_13180153	10.2876684131312	5.06789017742279	4.45458070315306	7.450489453475	0.587644071834842	Distal Intergenic	EMP1
cluster_1	chr12_131860420_131861228	15.1148335496759	7.90898502146943	5.56843187091524	7.20873058330415	0.86554025029558	Intron (ENST00000542763.2/ENST00000542763.2, intron 1 of 2)	MMP17
cluster_1	chr12_131989988_131991267	16.6180982606458	10.4312022071307	7.2155332007599	3.09453818691441	0.680976855286849	Exon (ENST00000389561.7/57634, exon 8 of 53)	EP400
cluster_1	chr12_132275074_132275557	17.1141677645814	4.33967643534645	3.92652830398369	4.31931433539141	0.920247295585475	Promoter (<=1kb)	LOC100130238
cluster_1	chr12_132436914_132438133	9.9393455393113	1.64306870642929	1.83324741278322	1.30073398201997	0.92249913910452	Distal Intergenic	FBRSL1
cluster_1	chr12_132549893_132550797	17.1043845438236	13.0298028529196	8.97955394821553	5.48779369517481	0.615255130532386	Exon (ENST00000624087.1/ENST00000624087.1, exon 1 of 1)	FBRSL1
cluster_1	chr12_132581978_132582503	13.6985374178551	10.4160741703834	5.68549523666451	2.05956495541048	0.57375997411349	Promoter (<=1kb)	MIR6763
cluster_1	chr12_132583227_132583967	12.6971875022535	7.38779721115324	5.12988083574255	2.48322283561446	0.734935903577401	Promoter (1-2kb)	MIR6763
cluster_1	chr12_132618247_132618949	13.5266324933834	6.72805547839965	3.83834705959641	3.14391815961835	0.856539461899555	Promoter (<=1kb)	P2RX2
cluster_1	chr12_132768230_132768893	14.1594981443722	6.29045897897287	2.67533799149404	2.77382064632403	0.864750166860071	Distal Intergenic	ANKLE2
cluster_1	chr12_132888811_132889351	24.7319104762579	2.53317830664545	1.85842988597822	2.13614329617397	0.929060096446197	Promoter (<=1kb)	CHFR-DT
cluster_1	chr12_13595528_13596393	5.8646805028772	1.38615564000083	1.26789838227975	2.73997315783014	0.701667602004132	Intron (ENST00000652867.1/105369668, intron 1 of 2)	GRIN2B
cluster_1	chr12_13749226_13749967	28.3194470129917	7.56629861562859	5.17984195320695	2.35833406388978	0.955072799698776	Intron (ENST00000609686.4/2904, intron 4 of 13)	GRIN2B
cluster_1	chr12_13980177_13982419	9.44155432469828	6.5490916120326	6.68607880913461	3.59017826501154	0.595957233743907	Promoter (<=1kb)	GRIN2B
cluster_1	chr12_14283497_14284680	8.48321971227726	3.42361759095604	2.56145804415525	1.36004145255913	0.890085215272753	Distal Intergenic	ATF7IP
cluster_1	chr12_14567293_14568365	21.8295451101784	8.59957437814875	6.36424663470211	4.46591323324222	0.939092451892722	Promoter (<=1kb)	PLBD1-AS1
cluster_1	chr12_15001643_15002502	8.18179381599928	3.49987528369086	2.6229840664521	2.32255978120002	0.966628936366129	Promoter (<=1kb)	LINC01489
cluster_1	chr12_1662672_1663522	28.1239058751676	5.52647632507875	3.37835451330849	1.93125348872476	0.981394419645394	Promoter (2-3kb)	MIR3649
cluster_1	chr12_18454278_18455015	12.2794674729618	2.57514647469197	7.05064577038244	2.44153179908799	0.624323781356494	Intron (ENST00000676171.1/5288, intron 18 of 32)	PIK3C2G
cluster_1	chr12_19263594_19264191	15.1261526102527	3.98808192408645	3.10422785038478	1.99616641024283	0.970848469200254	Intron (ENST00000429027.7/54477, intron 7 of 31)	PLEKHA5
cluster_1	chr12_19437831_19438412	15.822511818289	3.54565765077985	3.2217047512019	2.00392028026775	0.954055743186104	Promoter (1-2kb)	AEBP2
cluster_1	chr12_19496103_19496866	9.12902628052357	2.07629381272637	2.85159267281855	1.61524261194333	0.870679864332421	Intron (ENST00000541908.5/121536, intron 4 of 7)	AEBP2
cluster_1	chr12_2135467_2136463	10.1855323566083	5.89814229114865	4.11442964730048	2.12770684934102	0.746777101722541	Intron (ENST00000682544.1/775, intron 3 of 49)	CACNA1C
cluster_1	chr12_2197975_2198859	20.5462016678391	6.99226922091766	7.2191793488235	2.58800202922966	0.846210146532733	Intron (ENST00000682544.1/775, intron 3 of 49)	CACNA1C-AS4
cluster_1	chr12_23585319_23586206	19.6626789787304	1.36019661260366	1.26445212151844	0.539736158668112	0.934811848218791	Promoter (<=1kb)	SOX5
cluster_1	chr12_2376759_2377547	14.4033644054165	7.96448321890416	3.88718622828239	4.3563448069131	0.809347913766433	Intron (ENST00000682544.1/775, intron 3 of 49)	CACNA1C
cluster_1	chr12_2624493_2625563	8.40000095399636	3.49805023528514	4.32045935421439	3.83752872029816	0.818784813780206	Intron (ENST00000682544.1/775, intron 30 of 49)	CACNA1C
cluster_1	chr12_26884608_26885394	9.06893729877978	3.51058872059243	3.81208030100828	5.11748982139925	0.718160596954575	Distal Intergenic	INTS13
cluster_1	chr12_2690867_2692017	16.0711904674306	9.04811919620061	6.5158540789322	2.80457402433687	0.734992092273397	Promoter (<=1kb)	CACNA1C-AS1
cluster_1	chr12_2783783_2784583	8.61718233730162	5.4434163229857	3.23999281139162	5.03865752350286	0.711480892740797	Intron (ENST00000636122.1/283440, intron 2 of 5)	ITFG2-AS1
cluster_1	chr12_2845737_2846746	24.5565343364079	10.7310963143782	7.37072183901479	3.95856317341863	0.866560153968363	Intron (ENST00000644123.1/55846, intron 5 of 6)	ITFG2
cluster_1	chr12_2853507_2854026	18.696277683869	13.3063655109516	8.2708295889854	9.23804048312862	0.736996729013315	Intron (ENST00000644123.1/55846, intron 5 of 6)	TEX52
cluster_1	chr12_2944387_2945143	11.1730041960881	4.46314293871322	3.00392887975936	3.1329960801453	0.962605032527456	Distal Intergenic	TULP3
cluster_1	chr12_29591112_29591855	12.4468529403016	3.11515939867233	2.53297045397629	6.25744227052614	0.671919454950404	Intron (ENST00000539277.6/83857, intron 7 of 17)	TMTC1
cluster_1	chr12_2963679_2964338	21.3455227260713	2.83848251653477	1.27119166140424	6.75480373713535	0.757725749163731	Intron (ENST00000358409.7/7004, intron 2 of 11)	TEAD4
cluster_1	chr12_2998698_2999682	22.1379399384734	4.51911397038565	1.82830686073769	3.15382905386027	0.944292987961315	Intron (ENST00000358409.7/7004, intron 3 of 11)	TEAD4
cluster_1	chr12_3083843_3085202	15.9434704498396	3.40748982521982	1.92779952401171	1.71996199517907	0.981803068516843	Exon (ENST00000539631.1/10867, exon 2 of 2)	TSPAN9
cluster_1	chr12_3137261_3137741	15.2315220136498	5.36438521721531	4.23982828375851	3.44690219490596	0.979193216922228	Intron (ENST00000537971.5/10867, intron 1 of 7)	TSPAN9
cluster_1	chr12_31732980_31733700	26.5333192725576	6.07950510010389	4.16833014739163	2.50532368764598	0.977972892163751	Distal Intergenic	AMN1
cluster_1	chr12_32013249_32013938	27.5513645942778	0.566763527554808	0.232476184597399	1.31927257706379	0.901679376746229	Distal Intergenic	RESF1
cluster_1	chr12_32657517_32658106	12.3613644330723	6.04530250887912	4.89287351999344	2.77315920529656	0.838421119966384	Distal Intergenic	DNM1L
cluster_1	chr12_3275204_3275862	11.2082393154642	5.04579259055659	3.58624694279863	4.79580055222715	0.881123836806798	Promoter (2-3kb)	TSPAN9
cluster_1	chr12_3397508_3398367	10.4957900307504	4.93938263644546	1.83253105162255	1.84456264012962	0.827414111925757	Intron (ENST00000452611.6/56341, intron 1 of 9)	PRMT8
cluster_1	chr12_3456565_3457285	11.2913474538591	5.37530106459613	2.63514416795023	2.59232882304478	0.860879573693315	Intron (ENST00000452611.6/56341, intron 1 of 9)	PRMT8
cluster_1	chr12_39122205_39123215	11.9364544324557	2.83735988117243	3.20606379092903	3.1797915309778	0.887027865220879	Intron (ENST00000662938.1/105369730, intron 1 of 2)	LINC02406
cluster_1	chr12_4024942_4026259	27.98251227481	12.8184138721054	6.95316239677181	3.33944971774219	0.827441393880187	Exon (ENST00000669712.1/105369611, exon 4 of 4)	LOC105369611
cluster_1	chr12_40819297_40820055	12.1437926916895	5.9092992193976	3.77869000173275	3.055343735461	0.884832534663695	Intron (ENST00000551295.7/1272, intron 1 of 23)	CNTN1
cluster_1	chr12_4203733_4204624	16.8462460936149	1.32899717921061	1.3706689580857	2.23083816028992	0.881972929047147	Exon (ENST00000689188.1/ENST00000689188.1, exon 1 of 2)	CCND2-AS1
cluster_1	chr12_42756882_42757922	18.9514973353479	8.03730832112351	6.81110016708692	2.55681149502545	0.821730085694639	Distal Intergenic	LINC02450
cluster_1	chr12_4379185_4379826	20.7335369015374	11.6487979589484	8.18482226004291	5.72196412973872	0.817594552898929	Promoter (<=1kb)	FGF23
cluster_1	chr12_44317492_44318180	8.92076044183687	4.87047665793281	2.77596066477146	3.08023549921761	0.847478730629374	Promoter (<=1kb)	TMEM117
cluster_1	chr12_4450236_4451265	13.7936714178915	6.6522109490879	3.44283861099701	3.06922168672426	0.858635539668595	Distal Intergenic	FGF6
cluster_1	chr12_45049933_45051741	12.3032109379937	8.33353073957842	6.92807526211202	2.99166280650116	0.621400418775551	Promoter (<=1kb)	DBX2
cluster_1	chr12_45433288_45434044	19.389321819288	5.30441255521014	4.74575740151691	2.0635232484751	0.927828271560466	Intron (ENST00000425752.6/196527, intron 19 of 19)	ANO6
cluster_1	chr12_46357270_46358331	11.9191436459488	2.17922550481991	1.99168301591454	5.10671227523942	0.703873783600753	3' UTR	SLC38A2
cluster_1	chr12_46830637_46832132	11.7461082268875	6.68417412534949	5.14512731314326	4.79707663859983	0.91499690067015	Promoter (<=1kb)	SLC38A4
cluster_1	chr12_47193767_47194509	11.3787969561166	3.9306034826038	2.52222623823395	2.05000069243543	0.966173834586328	Intron (ENST00000432328.2/91523, intron 2 of 2)	MIR4698
cluster_1	chr12_4720041_4722032	11.443537066708	2.15373108354696	1.26170430792365	2.25382558535293	0.904874423946267	Promoter (<=1kb)	GAU1
cluster_1	chr12_47222622_47224054	17.0651449119682	4.41223342888628	4.01626222783612	2.42519622343081	0.951150827960478	Promoter (<=1kb)	PCED1B
cluster_1	chr12_4763432_4764196	17.8632147619607	6.47739966829402	3.46501299270334	3.12743527930137	0.941835405220722	Promoter (<=1kb)	GALNT8
cluster_1	chr12_47636949_47637767	15.5992789474179	1.47706111823796	1.14618620213136	2.60878743444076	0.867100172106122	Distal Intergenic	RPAP3
cluster_1	chr12_47734470_47735274	12.3861516639058	4.71737721680208	3.16885650084734	2.21224903980332	0.937076337431641	3' UTR	RAPGEF3
cluster_1	chr12_47753288_47754015	13.3678032556313	2.55649068447512	2.26669016496095	4.65353837449971	0.782104416630976	Promoter (<=1kb)	SLC48A1
cluster_1	chr12_47778868_47779999	20.7795369960461	10.4057381962132	6.78107475527805	3.55744864621302	0.811636481769689	Promoter (<=1kb)	SLC48A1
cluster_1	chr12_47941897_47942955	13.4239330472867	4.05640478847658	3.22172940958032	4.57410012366928	0.874524974819306	Promoter (<=1kb)	VDR
cluster_1	chr12_48021593_48022328	24.9248389334441	5.32250298356551	4.15028784369934	2.23541449944522	0.966900271635379	Intron (ENST00000546738.1/105369750, intron 3 of 3)	LOC105369750
cluster_1	chr12_48037186_48038144	21.3670754797779	10.5850273577202	8.09482594752382	8.71260914768272	0.950371454049277	Distal Intergenic	LOC105369750
cluster_1	chr12_48768055_48768983	11.4058075199396	5.9953986994206	5.95834514237292	2.06599001018178	0.69009421050374	3' UTR	MIR4701
cluster_1	chr12_48813498_48814099	18.6459056536933	6.50033272811644	7.03798104520673	6.09772632587396	0.910433170546136	Promoter (<=1kb)	CACNB3
cluster_1	chr12_48883089_48884287	12.5894729987277	9.72731088541744	6.4523781302496	3.30001391244673	0.583068065199174	Distal Intergenic	RND1
cluster_1	chr12_48924540_48925994	18.6109662749486	6.80395158796721	5.69234532503531	7.71989854261812	0.856604152494369	Promoter (<=1kb)	FKBP11
cluster_1	chr12_48965074_48965883	20.3110097666466	1.63420460104671	1.89161824014858	2.63095498697927	0.883824461657371	3' UTR	WNT10B
cluster_1	chr12_4908582_4909228	30.1158997740945	18.5279203704409	15.8887898824602	5.79061281119327	0.648914035884724	Promoter (<=1kb)	LOC100507560
cluster_1	chr12_49120869_49121534	9.52423985366858	5.21254329780446	2.42556291747411	4.31234316083731	0.755660265720912	Distal Intergenic	TUBA1B
cluster_1	chr12_49347562_49348109	20.131662820257	14.1435075758066	13.4422156745666	6.26959096427521	0.581005636295394	Promoter (<=1kb)	DNAJC22
cluster_1	chr12_49548849_49549648	15.6152977199807	6.43695530154776	5.2220288895958	3.65496957649736	0.933986281156209	3' UTR	KCNH3
cluster_1	chr12_49698502_49699514	20.6446567425481	6.61432400591337	2.68349448962024	10.9891024637488	0.640747417782996	Intron (ENST00000335154.10/91010, intron 1 of 25)	FMNL3
cluster_1	chr12_49866897_49867612	12.6757386901346	5.74720658909148	4.04156140242356	6.85029410223651	0.745355775292721	3' UTR	BCDIN3D
cluster_1	chr12_49909598_49910798	13.0991484930797	7.84195349933841	6.54557302178642	2.95021793426395	0.69823556265513	Promoter (<=1kb)	LINC02396
cluster_1	chr12_49959627_49960226	11.0653910509194	6.16431050499231	4.28440739084948	5.4488254050391	0.855860797803111	Promoter (1-2kb)	AQP5
cluster_1	chr12_50032520_50033675	11.7615124745746	9.45522183983621	6.12363913964988	2.58616011388784	0.54369678399535	Promoter (<=1kb)	RACGAP1
cluster_1	chr12_50039025_50039644	14.4903685986358	7.16689016083401	5.31523429126096	4.58071744356738	0.926953607981831	Distal Intergenic	RACGAP1
cluster_1	chr12_50070462_50070893	16.1749176591558	10.7383131578069	6.51904290454245	7.85811640672914	0.768752567666242	Promoter (<=1kb)	ASIC1
cluster_1	chr12_50387539_50388609	9.46786339344912	5.39879299755065	3.57942389465689	1.08428442483114	0.70086783489892	Intron (ENST00000543111.5/121006, intron 1 of 7)	LARP4
cluster_1	chr12_509415_510901	9.81878860920118	3.94963855467756	3.10022537694106	7.20501048511939	0.531697817660078	Intron (ENST00000266383.10/283358, intron 1 of 19)	B4GALNT3
cluster_1	chr12_51351797_51352444	11.6922567194573	7.02298075176257	4.17274897067497	2.38135982068624	0.733970856335915	3' UTR	CELA1
cluster_1	chr12_51390899_51392946	21.2710756695384	8.86820948759771	6.22788864419944	3.9944365141832	0.907254964727248	Promoter (<=1kb)	GALNT6
cluster_1	chr12_51531525_51532373	14.0531768346288	5.68733130849439	4.39603870997345	4.61655233372432	0.970045032983504	Distal Intergenic	SLC4A8
cluster_1	chr12_51828866_51829606	27.8925916132899	4.87203693155657	4.27831111084575	1.83476149919606	0.952982047375102	Intron (ENST00000637934.1/ENST00000637934.1, intron 3 of 4)	TMDD1
cluster_1	chr12_51855752_51856632	20.9642337312255	11.1663554124317	8.1905630858428	5.4239795626035	0.834455774376597	Distal Intergenic	FIGNL2
cluster_1	chr12_51863401_51865099	26.5015124657076	21.6168351053233	17.4889826688097	7.39165281803067	0.507090055573043	Distal Intergenic	FIGNL2
cluster_1	chr12_51887842_51888532	18.4515967918723	6.79817888037118	6.43284101911393	3.51697835680704	0.89707261682174	Promoter (<=1kb)	ANKRD33
cluster_1	chr12_51923038_51923901	11.3117468751548	6.83790197202448	3.09644374724531	2.93219218466731	0.746494735868491	3' UTR	ACVRL1
cluster_1	chr12_52014439_52015195	15.2095167004742	6.40989309055732	4.65414951998823	6.41554528072177	0.872697400301451	Promoter (<=1kb)	TAMALIN
cluster_1	chr12_52020533_52021105	22.4345997114292	11.2266008982432	6.61003063427716	4.67527338089027	0.841079626042944	Promoter (1-2kb)	NR4A1
cluster_1	chr12_5204104_5204759	19.3476908877367	8.68895691832054	9.91650699939088	1.20614899900312	0.650941549741369	Distal Intergenic	LINC02443
cluster_1	chr12_52119695_52120446	24.8987288047798	5.90964839371814	3.56739718058605	3.23189107147958	0.982996851130247	Distal Intergenic	LOC112268096
cluster_1	chr12_52125085_52125959	17.9518211486958	4.34532851143907	4.50745439358311	0.86702229798671	0.883039518175734	Distal Intergenic	LOC112268096
cluster_1	chr12_52163786_52164448	19.8989527533175	12.0428203899375	7.78121528761547	9.90187453399553	0.817724965927848	Promoter (<=1kb)	LINC00592
cluster_1	chr12_52200349_52201155	11.2219082223843	3.58030931147787	2.21485125385295	2.1074616343598	0.97742803418695	Intron (ENST00000640420.1/283404, intron 2 of 2)	LINC02874
cluster_1	chr12_5221744_5222575	18.4213647248468	4.45204345931877	2.3931088270185	2.70400267206843	0.971351967237132	Distal Intergenic	LINC02443
cluster_1	chr12_52232574_52234262	13.8613819040426	5.64128355005058	4.45087091973906	2.01366508552133	0.864434784363258	Promoter (<=1kb)	KRT7
cluster_1	chr12_52250193_52250922	9.74722465980119	3.73650155448353	2.29193821865823	2.81957985262247	0.93800854935378	Promoter (<=1kb)	KRT86
cluster_1	chr12_52496334_52497162	15.3692568906322	4.1689205801138	1.78413446233532	1.67600335731114	0.965958227167446	Distal Intergenic	KRT6A
cluster_1	chr12_52713972_52714936	11.4285053434329	9.28480782290946	4.60479581496717	2.52774509753051	0.560633942786839	Distal Intergenic	KRT77
cluster_1	chr12_52948686_52950146	26.2914414678911	14.5399084006105	9.79260900405498	13.2083899879681	0.831095248434324	Promoter (<=1kb)	KRT8
cluster_1	chr12_52964630_52965848	13.0527028724643	5.82709940597224	3.26927401105025	3.27447777845818	0.906625559062126	Distal Intergenic	KRT18
cluster_1	chr12_53049796_53050175	27.1672370038469	11.5808882810068	6.50953935942545	11.8693631056689	0.801241759217595	Promoter (<=1kb)	TNS2
cluster_1	chr12_53174988_53175572	27.0184083682247	5.3250738010153	2.99352589679919	3.29188270027749	0.966895115372426	Promoter (1-2kb)	CSAD
cluster_1	chr12_53189985_53190571	14.2518543128349	6.12345398829906	4.12949785855863	10.9015148138221	0.506699121439501	Promoter (1-2kb)	ITGB7
cluster_1	chr12_53197412_53198219	13.2427698091238	4.16845213940922	2.22927447423444	1.95790637084432	0.963881795148043	Promoter (<=1kb)	ITGB7
cluster_1	chr12_53213274_53213752	17.5799412210733	11.0981115544645	12.0707941270979	5.05124806095629	0.584439871496648	Promoter (1-2kb)	RARG
cluster_1	chr12_53216962_53217757	32.9043839725338	7.24007590307722	3.43471939648355	11.459570013859	0.775277839990905	Promoter (1-2kb)	RARG
cluster_1	chr12_53220030_53220410	13.9186383181941	9.71034180166729	6.3135212858282	4.88639964710953	0.708924200414355	Promoter (<=1kb)	RARG
cluster_1	chr12_53224501_53224866	24.6863684691804	7.65746174620273	2.09354418256	12.3012230196775	0.65089805376904	Intron (ENST00000394426.5/5916, intron 2 of 8)	RARG
cluster_1	chr12_53234250_53234613	22.6255778766137	11.2201642984075	7.02097737330003	8.47055842201114	0.894759431557503	Promoter (1-2kb)	RARG
cluster_1	chr12_53695334_53696847	17.7761994398474	10.9531768348803	9.59196324111306	5.41056766554303	0.723609262097044	Distal Intergenic	CALCOCO1
cluster_1	chr12_53738248_53739158	10.6938729262705	5.48522800806576	4.75073663919719	2.55603050639565	0.804083341421691	Promoter (<=1kb)	LOC107984525
cluster_1	chr12_53938314_53939437	17.3444957525602	3.51236936139149	3.75035431718202	2.65322830676637	0.929101274675151	Promoter (<=1kb)	HOXC13
cluster_1	chr12_53965730_53966738	11.8505004008219	1.62759575852999	1.47976461269397	2.0101086663435	0.895938140232421	Promoter (<=1kb)	HOTAIR
cluster_1	chr12_53995066_53996301	9.09120276114768	2.12358129675878	1.51005700875602	2.43332189332134	0.882718081956897	Promoter (<=1kb)	HOXC9
cluster_1	chr12_54159063_54159646	20.6172851845569	11.5672366486186	8.59912294809868	3.32032693035762	0.721968806094487	Intron (ENST00000634429.1/23583, intron 4 of 5)	LOC102724030
cluster_1	chr12_54207594_54208192	10.5580978484642	7.95472266125083	3.63775504393578	2.83307350347931	0.619218424850432	Distal Intergenic	SMUG1
cluster_1	chr12_54214609_54215171	27.10305975886	12.996060458032	11.3669539543008	10.3141727881252	0.980897587537634	Distal Intergenic	MIR3198-2
cluster_1	chr12_54217690_54218322	19.6564275738384	7.17008255568854	5.63363433927757	2.71404341049948	0.901380317004323	Distal Intergenic	MIR3198-2
cluster_1	chr12_5429614_5430463	13.83848919054	8.18826954602516	6.07380877517643	3.12197230193976	0.735023606659167	Promoter (1-2kb)	NTF3
cluster_1	chr12_54300684_54301766	22.0035385068665	11.4754951698432	8.14207747320132	13.6490901139499	0.691880074890308	Promoter (<=1kb)	COPZ1
cluster_1	chr12_54370128_54370903	26.5814221255053	10.6798112429667	11.2243270426013	17.4756915670986	0.621328287219726	3' UTR	GPR84
cluster_1	chr12_54526910_54527935	9.74291568806667	2.55015227221118	1.97025912232877	0.739295110673546	0.939608329301814	Intron (ENST00000293373.11/3071, intron 21 of 30)	NCKAP1L
cluster_1	chr12_54683135_54684118	25.0248931166039	2.38242933211267	3.57604741340644	1.05661598721487	0.908911503850024	Intron (ENST00000552524.1/ENST00000552524.1, intron 1 of 2)	DCD
cluster_1	chr12_54997929_54998676	9.05410874672952	1.98063545968722	1.92749259805083	1.20243440789201	0.944644612066018	Distal Intergenic	TESPA1
cluster_1	chr12_55484049_55484836	10.4677269954485	2.95592211544506	1.24261253180052	1.61451598461726	0.953270069209241	Intron (ENST00000556750.5/ENST00000556750.5, intron 2 of 3)	OR6C68
cluster_1	chr12_55646106_55646799	15.2357705777979	2.20188138152245	2.46993147894237	3.43231493357369	0.857292267383129	Exon (ENST00000609031.1/ENST00000609031.1, exon 1 of 1)	OR10P1
cluster_1	chr12_55681058_55682095	15.305506336283	4.3927660317542	2.27511680548867	5.13804278108057	0.828083848642272	Promoter (<=1kb)	METTL7B
cluster_1	chr12_55707308_55708558	35.7960971826234	23.2774531107687	19.1975282394838	8.50756423912598	0.650650932812703	Promoter (<=1kb)	ITGA7
cluster_1	chr12_55736986_55737597	24.3817702922583	9.00868774664049	8.15433126069114	7.11087470124975	0.968334618492367	Distal Intergenic	GDF11
cluster_1	chr12_55939956_55940859	25.1216008867667	13.7998031705019	8.92697120605374	16.9193132604171	0.622563651712952	Promoter (<=1kb)	DGKA
cluster_1	chr12_56078921_56081012	32.4502993138324	14.8440495305965	10.3894853516094	16.852223872767	0.772626573736895	Promoter (<=1kb)	ERBB3
cluster_1	chr12_57016192_57016867	9.73623390139784	2.6697977616308	2.1241904863386	1.33949979817733	0.966683419442668	Promoter (<=1kb)	TAC3
cluster_1	chr12_57214314_57214686	23.0910303624445	11.8811512042024	8.53865010397437	8.27562494277139	0.92783705564805	Promoter (2-3kb)	NXPH4
cluster_1	chr12_57224784_57225214	27.7206455986015	4.951881485096	3.49004161856778	2.43790326075078	0.970076342859543	3' UTR	SHMT2
cluster_1	chr12_57242404_57243960	30.5752542339546	16.4698182352699	14.2851689318188	10.8262900710919	0.889408459075016	Promoter (1-2kb)	NDUFA4L2
cluster_1	chr12_57454864_57455470	35.8524077980858	10.5784529018759	6.93988769961541	12.9349238548559	0.829209619424315	Promoter (<=1kb)	INHBE
cluster_1	chr12_57456138_57456443	33.8021353416849	8.73909216107047	7.71672538220904	6.74530565197327	0.956346489900163	Promoter (<=1kb)	INHBE
cluster_1	chr12_57475087_57476719	14.4730646108613	6.98407171636124	5.20366253358705	5.46063300540232	0.953920803080952	Promoter (<=1kb)	ARHGAP9
cluster_1	chr12_57609080_57610016	17.0254413839226	3.29262154349972	2.25855485664152	2.87972372594157	0.935878106869917	Promoter (<=1kb)	ARHGEF25
cluster_1	chr12_57619392_57620400	11.3206490161843	4.97696055210109	4.36784613839882	2.04061373570284	0.834416112635848	Promoter (<=1kb)	SLC26A10P
cluster_1	chr12_57735760_57736529	18.3418915629207	5.99745803319328	5.37915058538956	5.05082089410397	0.95782678870433	Promoter (1-2kb)	AGAP2
cluster_1	chr12_57738544_57739214	10.3871055715721	7.00736241043761	6.86055283759517	2.08286440629561	0.544743258935244	Promoter (<=1kb)	AGAP2
cluster_1	chr12_57756754_57757080	26.7260154254493	8.31510583523521	9.49772477752552	6.46193622009807	0.89934345808848	Promoter (<=1kb)	MARCHF9
cluster_1	chr12_57764712_57765792	16.1079064060802	5.35345221954283	3.24476336765715	4.45894378783415	0.927655252019737	Promoter (<=1kb)	CYP27B1
cluster_1	chr12_57766362_57767431	18.9772806000939	7.19327261801419	6.10129737883734	6.80920658491404	0.934766542492188	Promoter (<=1kb)	CYP27B1
cluster_1	chr12_57814866_57815598	13.8634213692326	3.47356273413559	2.5306587619986	3.05299041191864	0.940040144679487	Promoter (<=1kb)	AVIL
cluster_1	chr12_57836830_57837480	21.897034466361	6.60439608102163	8.91433868533001	15.4496702265709	0.531001828079607	Promoter (<=1kb)	LOC105369783
cluster_1	chr12_5964796_5965593	10.8425566916942	4.13330459412168	2.61876954263946	2.46135674642038	0.959755460228518	Promoter (2-3kb)	VWF
cluster_1	chr12_6038020_6038751	13.5068294770306	4.27679363207854	3.21738122718213	4.36755848520901	0.900226919990919	Intron (ENST00000261405.10/7450, intron 18 of 51)	VWF
cluster_1	chr12_6056361_6057136	15.7023974484366	4.93515565388164	2.82115862538345	0.875954523176219	0.912173515876221	Exon (ENST00000261405.10/7450, exon 15 of 52)	VWF
cluster_1	chr12_6057572_6058202	22.7236469344109	4.31588158716512	3.78559391151605	2.15040885775548	0.955881852743367	Exon (ENST00000261405.10/7450, exon 14 of 52)	VWF
cluster_1	chr12_6205097_6205713	20.6774699263026	4.59090958022662	3.67518421016775	3.93529457764241	0.942824240599437	Intron (ENST00000382518.6/928, intron 2 of 8)	CD9
cluster_1	chr12_6214717_6215776	27.2551429859888	3.75518590606876	2.76755987323816	4.1040976741624	0.910267983153305	Intron (ENST00000382518.6/928, intron 2 of 8)	CD9
cluster_1	chr12_62435178_62436317	18.111332125846	6.50980079372649	5.15796113869883	4.51457465607379	0.984996057201042	Distal Intergenic	MON2
cluster_1	chr12_62629346_62629821	18.2077018653475	3.97512533914472	6.31164486453951	2.88020524457845	0.829325136358852	Distal Intergenic	LINC01465
cluster_1	chr12_62653107_62654386	24.6522435287247	7.19172946203417	5.35095108453129	2.5904223645948	0.944852502778047	Intron (ENST00000228705.7/57460, intron 9 of 9)	LINC01465
cluster_1	chr12_62656591_62657113	13.2863868391975	4.70146168192807	2.32512578251485	2.54847097387316	0.940598607824694	Intron (ENST00000228705.7/57460, intron 9 of 9)	LINC01465
cluster_1	chr12_62659309_62659988	32.9174467506447	4.84805243270908	2.21247409933688	3.56198810221407	0.942740600702255	Intron (ENST00000228705.7/57460, intron 9 of 9)	LINC01465
cluster_1	chr12_62913826_62914904	15.3104257961861	0.982503621882155	0.600587741254196	1.36879341785157	0.902806566740388	Intron (ENST00000228705.7/57460, intron 1 of 9)	PPM1H
cluster_1	chr12_62933262_62933629	25.0176759870387	8.38053719942026	9.6600726220592	15.7218565349169	0.61393615656358	Promoter (<=1kb)	PPM1H
cluster_1	chr12_630483_631309	16.9459499495535	2.52445130420535	1.22648189993366	2.24078450947609	0.926972282210982	Promoter (<=1kb)	NINJ2-AS1
cluster_1	chr12_6310114_6311302	27.2754747457088	9.7576328402136	7.54059162954702	6.677447867671	0.985745685214664	Promoter (<=1kb)	PLEKHG6
cluster_1	chr12_6312389_6313323	16.9194981978114	6.78197242383332	6.44228850790382	5.36622296219213	0.95618099650857	Promoter (<=1kb)	PLEKHG6
[truncated: 16,195 more rows]
