# Supplementary material for: Epigenetic insights into GABAergic development in Dravet Syndrome iPSC and therapeutic implications
Source: eLife. 2024 Aug 27;12:RP92599. doi: 10.7554/eLife.92599 (PMC11349296; doi:10.7554/eLife.92599)
Supplement: Supplementary file 4. — Source data for Figure 2F. [file elife-92599-supp4.xlsx]

## Sheet: kegg.list_of_genes_in_cluster_1
ID	Description	GeneRatio	BgRatio	pvalue	p.adjust	geneID
hsa04020	Calcium signaling pathway	98/1928	253/8521	3.58E-09	1.20E-06	CASQ2/NTRK1/CACNA1E/HTR6/CAMK1G/RYR2/CHRM3/FGF8/FGFR2/VDAC2/HTR7/PDGFD/P2RX3/CHRM1/PLCB3/TPCN2/FGF19/FGF4/GRM5/ATP2A2/TPCN1/P2RX4/P2RX2/GRIN2B/CACNA1C/FGF23/FGF6/ERBB3/FLT1/ADCY4/NFATC4/SLC8A3/PLCB2/ITPKA/NTRK3/GRIN2A/PRKCB/PLCG2/ADORA2B/P2RX5/ATP2A3/ERBB2/PRKCA/GRIN2C/SPHK1/GNA11/RYR1/SLC8A2/GRIN2D/HRC/PRKCG/ADCY3/LHCGR/ADRA1D/TNNC2/NFATC2/GNAS/ADORA2A/PDGFB/CACNA1I/ATP2B2/MYLK/OXTR/CAMK2D/FGF2/…
hsa04015	Rap1 signaling pathway	84/1928	210/8521	8.37E-09	1.40E-06	RASSF5/PRKCZ/RAP1GAP/LPAR3/PIK3CD/FGF8/FGFR2/APBB1IP/PARD3/PDGFD/CTNND1/PLCB3/RASGRP2/SIPA1/FGF19/FGF4/GRIN2B/FGF23/FGF6/RAPGEF3/LPAR5/RAP1B/FLT1/AKT1/ADCY4/SIPA1L1/PGF/PLCB2/MAP2K1/GRIN2A/PRKCB/CDH1/BCAR1/ADORA2B/ITGA2B/SKAP1/NGFR/PRKCA/MAP2K6/SIPA1L3/VASP/PRKD2/PRKCG/VAV1/RALB/ADCY3/GNAS/ANGPT4/ITGB2/ADORA2A/RAC2/PDGFB/ADCY5/MRAS/PIK3CB/GNAI2/MAGI1/FGF2/PDGFRA/EFNA5/ARAP3/FGF1/LCP2/FGF18/FGFR4/…
hsa04080	Neuroactive ligand-receptor interaction	128/1928	367/8521	3.15E-08	3.51E-06	PAQR6/HTR6/ADORA1/CNR2/CHRM3/OPRD1/GRIK3/LEPR/UTS2/LPAR3/ADRA2A/PRLHR/PARD3/NPFFR1/GRID1/HTR7/GRIA4/GRIK4/PTH/CALCB/CALCA/FSHB/P2RX3/CHRM1/GAL/P2RY2/GRM5/P2RX4/P2RX2/GRIN2B/TAC3/NTS/MLNR/SSTR1/PTGDR/GABRB3/GABRA5/GABRG3/CHRNB4/GRIN2A/NPW/MC1R/ADORA2B/P2RX5/PYY/TAC4/GH2/GH1/CHRNB1/GRIN2C/NPB/UTS2R/GALR1/P2RY11/S1PR5/GRIK5/GIPR/PTGIR/GRIN2D/LHB/PTH2/C3/KISS1R/NTSR2/SCTR/LYPD6/CHRNA1/NMUR1/CHRNG/POM…
hsa04024	cAMP signaling pathway	83/1928	225/8521	6.62E-07	5.53E-05	NPR1/ATP1A2/ATP1A4/HTR6/ADORA1/KCNK2/RYR2/SLC9A1/PIK3CD/GRIA4/RRAS2/BDNF/FSHB/CHRM1/PAK1/ATP2A2/GRIN2B/CACNA1C/RAPGEF3/RAP1B/PPP1R12A/AKT1/ADCY4/SSTR1/FOS/MAP2K1/HCN4/GRIN2A/CNGB1/ATP2A3/PPP1R1B/GRIN2C/ATP1B2/PDE4A/PDE4C/GIPR/GRIN2D/LHB/TNNI3/VAV1/ADCY3/POMC/LHCGR/OXT/GNAS/ADORA2A/RAC2/EP300/PPARA/ATP2B2/ADCY5/PIK3CB/GHSR/SST/GNAI2/OXTR/CAMK2D/NPY1R/ACOX3/MAPK10/DRD5/CAMK4/ARAP3/HTR4/ADRB2/CAMK2A…
hsa04724	Glutamatergic synapse	49/1928	115/8521	1.25E-06	8.38E-05	GRIK3/SLC1A7/GRIA4/GRIK4/SLC17A6/PLCB3/GRK2/SHANK2/GRM5/GRIN2B/CACNA1C/SLC38A2/ADCY4/PLCB2/PLA2G4E/PLA2G4D/GRIN2A/PRKCB/GNG13/GNGT2/PRKCA/DLG4/GRIN2C/DLGAP1/HOMER3/GRIK5/GRIN2D/SLC17A7/PRKCG/ADCY3/LZTS3/GNAS/GRK3/ADCY5/SLC38A3/GNAI2/GRM2/GRM7/SLC1A3/ADCY2/GRIK2/GRM1/ITPR3/GRM4/GNAI1/GRM3/ADCY8/GRIN3A/GRIN1
hsa04360	Axon guidance	69/1928	182/8521	1.87E-06	0.000101613	SEMA6C/SEMA4A/PRKCZ/EPHA8/EPHB2/PIK3CD/ABLIM1/PARD3/CXCL12/ARHGEF12/CFL1/RHOD/PAK1/RND1/NFATC4/PAK6/BUB1B-PAK6/SEMA6D/SEMA4B/FES/PLCG2/PRKCA/NTN1/DCC/PAK4/SEMA6B/NGEF/DPYSL5/SEMA4C/NFATC2/BMP7/LIMK2/RAC2/SEMA5B/EPHB1/PIK3CB/PLXNB1/GNAI2/SEMA3B/SEMA3G/ROBO2/SRGAP3/CAMK2D/MYL5/ABLIM2/BMPR1B/EFNA5/CAMK2A/SLIT3/UNC5A/FYN/EPHB4/PLXNA4/EPHA1/SHH/CAMK2B/LIMK1/GNAI1/SEMA3C/SEMA3E/SEMA3A/PTK2/DPYSL2/UNC5D…
hsa04510	Focal adhesion	75/1928	203/8521	2.13E-06	0.000101613	LAMC2/PIK3CD/DOCK1/PTEN/BIRC2/PDGFD/CCND1/PAK1/MYL2/PXN/EMP1/ITGB7/ITGA7/VWF/RAP1B/PPP1R12A/COL4A1/COL4A2/FLT1/AKT1/PGF/PAK6/BUB1B-PAK6/MAP2K1/ITGA11/RASGRF1/PRKCB/BCAR1/ERBB2/ITGA2B/ITGA3/CHAD/PRKCA/ITGB4/BCL2/PIP5K1C/ACTN4/PAK4/VASP/PRKCG/PPP1R12C/VAV1/ITGA6/COL6A3/LAMA5/RAC2/PDGFB/PARVB/MYLK/ITGB5/COL6A5/COL6A6/PIK3CB/FLNB/CAV3/PDGFRA/MYL5/MAPK10/SPP1/THBS4/FYN/LAMA2/CCND3/VEGFA/MYL10/LAMB1/CA…
hsa04670	Leukocyte transendothelial migration	48/1928	115/8521	3.25E-06	0.000135839	F11R/RASSF5/PIK3CD/CXCL12/CTNNA3/THY1/CTNND1/SIPA1/MYL2/PXN/RAPGEF3/RAP1B/CLDN10/PRKCB/CLDN9/BCAR1/PLCG2/PECAM1/PRKCA/CLDN7/ICAM1/ACTN4/VASP/PRKCG/VAV1/MMP9/ITGB2/CLDN5/RAC2/CLDN18/PIK3CB/CLDN11/GNAI2/MYL5/CTNNA1/CLDN20/AFDN/MAPK13/CLDN15/MYL10/ACTB/CLDN3/CLDN4/GNAI1/PTK2/CLDN23/VAV2/CD99L2
hsa04928	Parathyroid hormone synthesis, secretion and action	45/1928	106/8521	3.81E-06	0.000141236	MEF2D/PTH/PLCB3/LRP5/ARRB1/MMP17/FGF23/VDR/CYP27B1/TNFSF11/MMP14/ADCY4/FOS/PLCB2/MAP2K1/AKAP13/PRKCB/MMP25/PRKCA/BCL2/PDE4A/PDE4C/GNA11/ARHGEF1/PRKCG/NR4A2/ATF2/ADCY3/MAFB/GNAS/CASR/ADCY5/PTH1R/GNAI2/SLC34A2/ADCY2/ITPR3/CREB3L2/GNA12/EGFR/GNAI1/ADCY8/FGFR1/MMP16/RXRA
hsa04010	MAPK signaling pathway	101/1928	301/8521	6.63E-06	0.000221502	NTRK1/CACNA1E/MAPKAPK2/TGFB2/DUSP10/MAP3K21/RPS6KA1/MAP3K6/ARTN/FGF8/DUSP5/FGFR2/PDGFD/RRAS2/PTPN5/BDNF/RASGRP2/MAP3K11/FGF19/FGF4/ARRB1/PAK1/MAPKAPK5/CACNA1C/FGF23/FGF6/CACNB3/NR4A1/NTF3/ERBB3/TNFRSF1A/RAP1B/PTPRR/FLT3/FLT1/AKT1/PGF/FOS/PLA2G4E/PLA2G4D/MAP2K1/RASGRF1/MAPK8IP3/PRKCB/CACNB1/ERBB2/NGFR/PRKCA/MAP2K6/TP53/GADD45B/RASGRP4/PPP5C/FLT3LG/PRKCG/CACNG7/CACNG8/CACNG6/NRTN/MAP4K4/CACNB4/ATF2…
hsa04520	Adherens junction	40/1928	93/8521	8.88E-06	0.000269686	PTPRF/SSX2IP/TCF7L2/PARD3/CTNNA3/SORBS1/NECTIN1/PTPRJ/CTNND1/MYL2/RAP1B/PTPN6/LMO7/SMAD3/IQGAP1/CDH1/ERBB2/BAIAP2/SMAD4/PTPRM/YES1/ACTN4/RASIP1/TCF7L1/SNAI1/CSNK2A1/RAC2/EP300/MYL5/TCF7/CTNNA1/FYN/AFDN/MAP3K7/MYL10/RADIL/EGFR/ACTB/FGFR1/WAS
hsa05032	Morphine addiction	39/1928	91/8521	1.27E-05	0.000353345	KCNJ9/ADORA1/GRK2/PDE2A/ARRB1/ADCY4/GABRB3/GABRA5/GABRG3/PDE8A/PRKCB/GNG13/GNGT2/PRKCA/PDE4A/PDE4C/PRKCG/PDE11A/ADCY3/SLC32A1/GNAS/GRK3/ADCY5/GNAI2/GABRG1/GABRG2/GABRP/DRD1/GRK6/ADCY2/PDE8B/OPRM1/PDE10A/PDE1C/GNAI1/ADCY8/PDE7A/CACNA1B/GABRQ
hsa04310	Wnt signaling pathway	63/1928	171/8521	1.52E-05	0.000390069	VANGL2/LGR6/WNT3A/ROR1/TCF7L2/CTBP2/FRAT2/SFRP5/PLCB3/LRP5/CCND1/WNT10B/WIF1/NFATC4/PSEN1/CCDC88C/PLCB2/SMAD3/TLE3/PRKCB/SERPINF1/FZD2/RNF43/AXIN2/PRKCA/TP53/NOTUM/SMAD4/APC2/TLE2/PRKCG/FZD7/WNT6/TCF7L1/RSPO4/NFATC2/CSNK2A1/RAC2/CSNK1E/TPTEP2-CSNK1E/EP300/WNT7B/RUVBL1/SENP2/PRICKLE2/CAMK2D/SFRP2/MAPK10/CTNND2/TCF7/WNT8A/CAMK2A/FBXW11/CCND3/MAP3K7/WNT16/CAMK2B/SFRP1/SOX17/CER1/TLE1/ROR2/GPC4
hsa05412	Arrhythmogenic right ventricular cardiomyopathy	34/1928	77/8521	2.11E-05	0.000503569	LMNA/RYR2/TCF7L2/CTNNA3/ATP2A2/CACNA1C/CACNB3/ITGB7/ITGA7/SLC8A3/ITGA11/CACNB1/ATP2A3/JUP/ITGA2B/ITGA3/ITGB4/SLC8A2/CACNG7/CACNG8/CACNG6/CACNB4/ITGA6/DES/TCF7L1/ITGB5/DAG1/CACNA2D3/TCF7/CTNNA1/GJA1/LAMA2/ACTB/CACNA1F
hsa04151	PI3K-Akt signaling pathway	113/1928	354/8521	2.51E-05	0.000559608	CASP9/NTRK1/LAMC2/CSF3R/LPAR3/PIK3CD/FGF8/FGFR2/PPP2R2D/PTEN/PDGFD/BDNF/CHRM1/CCND1/FGF19/FGF4/FGF23/FGF6/NR4A1/ITGB7/NTF3/ITGA7/ERBB3/VWF/LPAR5/COL4A1/COL4A2/FLT3/FLT1/PPP2R5C/AKT1/PGF/MAP2K1/ITGA11/IL4R/PHLPP2/GNG13/ERBB2/BRCA1/ITGA2B/GNGT2/NGFR/ITGA3/CHAD/GH2/GH1/PRKCA/ITGB4/TP53/RPTOR/PIK3R5/PHLPP1/BCL2/STK11/PKN1/JAK3/GYS1/FLT3LG/ITGA6/ATF2/COL6A3/LAMA5/ANGPT4/IFNAR1/OSM/IL2RB/PDGFB/ITGB5/CO…
hsa04072	Phospholipase D signaling pathway	55/1928	148/8521	3.93E-05	0.000819532	PLPP3/LPAR3/PIK3CD/PDGFD/RRAS2/DGKZ/PLCB3/GRM5/RAPGEF3/DGKA/LPAR5/DGKH/AKT1/ADCY4/PLCB2/PLA2G4E/PLA2G4D/MAP2K1/PLCG2/PRKCA/SPHK1/PIK3R5/PLPP2/PIP5K1C/RALB/ADCY3/AVP/GNAS/PDGFB/ADCY5/MRAS/PIK3CB/DGKG/GRM2/GRM7/PDGFRA/DGKQ/PLPP1/ADCY2/FYN/GRM1/GRM4/PIK3CG/DGKI/DGKB/GNA12/PDGFA/EGFR/CYTH3/GRM3/ADCY8/AGPAT5/DNM1/RALGDS/SYK
hsa05205	Proteoglycans in cancer	71/1928	205/8521	4.93E-05	0.000967937	TGFB2/HSPG2/WNT3A/SLC9A1/PIK3CD/ANK3/HPSE2/RDX/ARHGEF12/RRAS2/CD44/CCND1/PAK1/PXN/WNT10B/ERBB3/PTPN6/NANOG/PPP1R12A/AKT1/MAP2K1/IQGAP1/PRKCB/TFAP4/PLCG2/ERBB2/STAT3/FZD2/MIR21/PRKCA/TP53/SMAD2/ARHGEF1/PRKCG/PPP1R12C/VAV1/FZD7/SDC1/WNT6/GPC1/MMP9/WNT7B/ITGB5/MRAS/PIK3CB/FLNB/CAV3/ANK2/CAMK2D/FGF2/TLR2/HPSE/WNT8A/CAMK2A/ESR1/ITPR3/MAPK13/VEGFA/CAV1/WNT16/SHH/CAMK2B/EGFR/ACTB/PTK2/FGFR1/ANK1/VAV2/RP…
hsa05414	Dilated cardiomyopathy	39/1928	96/8521	5.51E-05	0.001022514	LMNA/TNNT2/TGFB2/RYR2/ATP2A2/MYL2/CACNA1C/CACNB3/ITGB7/ITGA7/ADCY4/SLC8A3/ACTC1/TPM1/ITGA11/CACNB1/ATP2A3/ITGA2B/ITGA3/ITGB4/SLC8A2/CACNG7/CACNG8/CACNG6/TNNI3/CACNB4/ITGA6/DES/ADCY3/GNAS/ADCY5/ITGB5/DAG1/CACNA2D3/ADCY2/LAMA2/ACTB/ADCY8/CACNA1F
hsa04390	Hippo signaling pathway	56/1928	157/8521	0.000123602	0.002172785	PRKCZ/TGFB2/WNT3A/TP73/TCF7L2/PPP2R2D/PARD3/CTNNA3/BMPR1A/YAP1/BIRC2/TEAD1/CCND1/DLG2/TEAD4/WNT10B/PALS1/SMAD3/CDH1/FZD2/AXIN2/DLG4/LLGL2/SMAD2/SMAD7/SMAD4/APC2/GLI2/FZD7/WNT6/TCF7L1/ID2/BMP7/ITGB2/CSNK1E/TPTEP2-CSNK1E/WNT7B/WWTR1/PPP2R2C/MOB1B/RASSF6/BMPR1B/TCF7/WNT8A/CTNNA1/FGF1/PPP2R2B/FBXW11/TEAD3/CCND3/WNT16/ACTB/YWHAZ/PPP2R2A/GDF6/CRB2
hsa04261	Adrenergic signaling in cardiomyocytes	55/1928	154/8521	0.000136209	0.00227469	ATP1A2/ATP1A4/TNNT2/KCNK2/RYR2/SLC9A1/PPP2R2D/PLCB3/ATP2A2/MYL2/CACNA1C/RAPGEF3/CACNB3/PPP2R5C/AKT1/ADCY4/SLC8A3/ACTC1/PLCB2/TPM1/CACNB1/ATP2A3/PRKCA/ATP1B2/PIK3R5/BCL2/SLC8A2/CACNG7/CACNG8/CACNG6/TNNI3/CACNB4/ATF2/ADCY3/ADRA1D/GNAS/ATP2B2/ADCY5/SCN5A/GNAI2/CACNA2D3/CAMK2D/PPP2R2C/PPP2R2B/ADRB2/CAMK2A/ADCY2/MAPK13/PIK3CG/CREB3L2/CAMK2B/GNAI1/ADCY8/PPP2R2A/CACNA1F
hsa04750	Inflammatory mediator regulation of TRP channels	38/1928	98/8521	0.000218309	0.003472151	NTRK1/CYP2J2/PIK3CD/PLCB3/P2RY2/TRPV4/ASIC1/ADCY4/PRKCH/PLCB2/PLA2G4E/PLA2G4D/PRKCB/PLCG2/ASIC2/PRKCA/MAP2K6/ALOX12/PRKCG/ASIC4/ADCY3/GNAS/PLA2G6/ADCY5/PIK3CB/IL1RAP/CAMK2D/MAPK10/CAMK2A/PTGER4/ADCY2/F2RL1/ITPR3/MAPK13/ASIC3/CAMK2B/ADCY8/TRPA1
hsa04810	Regulation of actin cytoskeleton	75/1928	229/8521	0.000237409	0.003604298	CHRM3/SLC9A1/PIK3CD/FGF8/FGFR2/DOCK1/PIP4K2A/CXCL12/PDGFD/RDX/ARHGEF12/RRAS2/CHRM1/CFL1/FGF19/FGF4/PAK1/MYL2/PXN/FGF23/FGF6/ITGB7/NCKAP1L/ITGA7/LPAR5/PPP1R12A/DIAPH3/AKT1/PAK6/BUB1B-PAK6/MAP2K1/ITGA11/IQGAP1/BCAR1/ITGAE/ITGA2B/ITGA3/ITGB4/BAIAP2/APC2/PIP5K1C/ACTN4/PAK4/ARHGEF1/PPP1R12C/VAV1/ARHGEF4/ITGA6/ACTR2/ITGB2/LIMK2/MYH9/RAC2/PDGFB/MYLK/ITGB5/MRAS/PIK3CB/FGF2/PDGFRA/MYL5/FGF1/FGF18/FGFR4/C7…
hsa04971	Gastric acid secretion	31/1928	76/8521	0.000285274	0.004142673	ATP1A2/ATP1A4/KCNK2/CHRM3/SLC9A1/KCNJ1/PLCB3/ADCY4/PLCB2/PRKCB/PRKCA/ATP1B2/ATP4A/PRKCG/ADCY3/GNAS/ADCY5/MYLK/SST/GNAI2/CAMK2D/CAMK2A/HRH2/ADCY2/ITPR3/CFTR/SLC4A2/CAMK2B/ACTB/GNAI1/ADCY8
hsa04725	Cholinergic synapse	42/1928	113/8521	0.000308851	0.004298175	CHRM3/KCNQ4/PIK3CD/CHRM1/PLCB3/CACNA1C/AKT1/ADCY4/FOS/PLCB2/MAP2K1/CHRNB4/PRKCB/GNG13/GNGT2/PRKCA/PIK3R5/BCL2/GNA11/KCNJ14/PRKCG/SLC5A7/ADCY3/CHRNA4/KCNQ2/ADCY5/PIK3CB/GNAI2/CAMK2D/CAMK4/CAMK2A/ADCY2/FYN/ITPR3/PIK3CG/CREB3L2/CAMK2B/GNAI1/ADCY8/KCNQ3/CACNA1B/CACNA1F
hsa05410	Hypertrophic cardiomyopathy	35/1928	90/8521	0.000357309	0.004773651	LMNA/TNNT2/TGFB2/RYR2/ATP2A2/MYL2/CACNA1C/CACNB3/ITGB7/ITGA7/SLC8A3/ACTC1/TPM1/ITGA11/CACNB1/ATP2A3/ITGA2B/ITGA3/ACE/ITGB4/SLC8A2/CACNG7/CACNG8/CACNG6/TNNI3/CACNB4/ITGA6/DES/ITGB5/DAG1/CACNA2D3/LAMA2/IL6/ACTB/CACNA1F
hsa04666	Fc gamma R-mediated phagocytosis	37/1928	97/8521	0.000384447	0.00493866	ASAP3/PLPP3/PIK3CD/DOCK1/CFL1/INPPL1/PAK1/AKT1/PLA2G4E/PLA2G4D/MAP2K1/PRKCB/PLCG2/PRKCA/SPHK1/PLPP2/PIP5K1C/VASP/PRKCG/VAV1/BIN1/INPP5D/ACTR2/HCK/LIMK2/RAC2/PLA2G6/PIK3CB/MYO10/PLPP1/MARCKS/LIMK1/ASAP1/LYN/VAV2/SYK/WAS
hsa05033	Nicotine addiction	19/1928	40/8521	0.000451709	0.005587804	GRIA4/SLC17A6/GRIN2B/GABRB3/GABRA5/GABRG3/GRIN2A/GRIN2C/GRIN2D/SLC17A7/SLC32A1/CHRNA4/GABRG1/GABRG2/GABRP/GRIN3A/GRIN1/CACNA1B/GABRQ
hsa04550	Signaling pathways regulating pluripotency of stem cells	50/1928	143/8521	0.000478108	0.005703148	LEFTY1/LEFTY2/WNT3A/PIK3CD/FGFR2/NODAL/BMPR1A/PAX6/TBX3/WNT10B/INHBE/NANOG/AKT1/ESRRB/ONECUT1/MAP2K1/SMAD3/ZFHX3/STAT3/FZD2/HOXB1/AXIN2/SMAD2/SMAD4/APC2/JAK3/INHBB/FZD7/WNT6/MEIS1/ID2/WNT7B/PIK3CB/HESX1/FGF2/REST/BMPR1B/TCF7/WNT8A/HAND1/FGFR4/LIFR/ISL1/JARID2/MAPK13/WNT16/INHBA/DLX5/FGFR1/ZIC3
hsa04392	Hippo signaling pathway - multiple species	15/1928	29/8521	0.000578179	0.006659032	RASSF4/YAP1/TEAD1/DCHS1/PAK1/TEAD4/RASSF2/CSNK1E/TPTEP2-CSNK1E/WWTR1/FAT4/DCHS2/MOB1B/RASSF6/TEAD3
hsa04934	Cushing syndrome	53/1928	155/8521	0.000606317	0.006750333	PBX1/KCNK2/WNT3A/E2F2/TCF7L2/KCNA4/PLCB3/CCND1/SCARB1/CACNA1C/WNT10B/NR4A1/RAP1B/ADCY4/PLCB2/MAP2K1/PDE8A/FZD2/AIPL1/AXIN2/APC2/GNA11/ATF2/PDE11A/FZD7/WNT6/ADCY3/POMC/TCF7L1/GNAS/CACNA1I/WNT7B/ADCY5/GNAI2/CAMK2D/TCF7/WNT8A/CAMK2A/ADCY2/PDE8B/ITPR3/WNT16/CREB3L2/CAMK2B/EGFR/GNAI1/CDK6/ADCY8/NR5A1/WDR5/CDKN2A/CDKN2B/CACNA1F
hsa04911	Insulin secretion	33/1928	86/8521	0.000688277	0.007415631	ATP1A2/ATP1A4/RYR2/CHRM3/SLC2A1/KCNMA1/ABCC8/PLCB3/CACNA1C/ADCY4/PLCB2/PRKCB/PRKCA/ATP1B2/GNA11/FFAR1/TRPM4/PRKCG/ATF2/ADCY3/GNAS/ADCY5/CCK/CAMK2D/KCNN2/CAMK2A/ADCY2/ITPR3/CREB3L2/CAMK2B/RIMS2/ADCY8/CACNA1F
hsa05226	Gastric cancer	51/1928	149/8521	0.000741904	0.007511782	TGFB2/WNT3A/E2F2/PIK3CD/FGF8/TCF7L2/FGFR2/CTNNA3/FRAT2/LRP5/CCND1/FGF19/FGF4/FGF23/FGF6/WNT10B/CDX2/AKT1/MAP2K1/SMAD3/CDH1/ERBB2/JUP/FZD2/AXIN2/TP53/SMAD2/SMAD4/BCL2/APC2/GADD45B/FZD7/WNT6/TCF7L1/WNT7B/PIK3CB/RARB/FGF2/TERT/TCF7/WNT8A/CTNNA1/FGF1/FGF18/WNT16/SHH/EGFR/ABCB1/CDH17/RXRA/CDKN2B
hsa04022	cGMP-PKG signaling pathway	56/1928	167/8521	0.000742182	0.007511782	NPPB/NPR1/MEF2D/ATP1A2/ATP1A4/ADORA1/OPRD1/ADRA2A/PRKG1/VDAC2/KCNMA1/GUCY1A2/PLCB3/PDE2A/ATP2A2/CACNA1C/PPP1R12A/AKT1/ADCY4/NFATC4/SLC8A3/PLCB2/MAP2K1/CNGB1/ATP2A3/ATP1B2/PIK3R5/MEF2B/GNA11/VASP/SLC8A2/ATF2/ADCY3/ADRA1D/NFATC2/ATP2B2/ADCY5/MYLK/GNAI2/SLC25A4/ADRA2C/PRKG2/VDAC1/ADRB2/ADCY2/ITPR3/PIK3CG/CREB3L2/GNA12/GTF2IRD1/GTF2I/GNAI1/GATA4/ADCY8/ADRB3/CACNA1F
hsa04713	Circadian entrainment	36/1928	97/8521	0.000833127	0.008184249	KCNJ9/NOS1AP/RYR2/PRKG1/GRIA4/GUCY1A2/PLCB3/GRIN2B/CACNA1C/ADCY4/FOS/PLCB2/GRIN2A/PRKCB/GNG13/GNGT2/PRKCA/GRIN2C/PER1/RYR1/GRIN2D/PRKCG/ADCY3/GNAS/CACNA1I/ADCY5/GNAI2/CAMK2D/PRKG2/CAMK2A/ADCY2/ITPR3/CAMK2B/GNAI1/ADCY8/GRIN1
hsa04921	Oxytocin signaling pathway	52/1928	154/8521	0.00094378	0.009006362	NPR1/KCNJ9/PTGS2/CAMK1G/RYR2/GUCY1A2/PLCB3/CCND1/CACNA1C/CACNB3/PPP1R12A/ADCY4/NFATC4/FOS/PLCB2/PLA2G4E/PLA2G4D/MAP2K1/PRKCB/CACNB1/PRKCA/PIK3R5/RYR1/KCNJ14/PRKCG/CACNG7/CACNG8/CACNG6/PPP1R12C/CACNB4/ADCY3/OXT/NFATC2/GNAS/TRPM2/ADCY5/MYLK/GNAI2/CACNA2D3/OXTR/CAMK2D/CAMK4/CAMK2A/ADCY2/ITPR3/PIK3CG/CAMK2B/EGFR/ACTB/GNAI1/ADCY8/CACNA1F
hsa00512	Mucin type O-glycan biosynthesis	17/1928	36/8521	0.000972441	0.009022094	GALNT2/ST6GALNAC3/B3GNT6/GALNT8/GALNT6/GALNT16/GCNT3/ST3GAL2/B3GNT3/GALNT13/GALNT5/GALNT3/GALNT14/GALNTL6/GCNT4/GALNTL5/C1GALT1
hsa05030	Cocaine addiction	21/1928	49/8521	0.001251184	0.011294471	TH/BDNF/GRIN2B/GRIN2A/PPP1R1B/RGS9/DLG4/GRIN2C/GRIN2D/ATF2/GNAS/ADCY5/GNAI2/GRM2/DRD1/CREB3L2/GNAI1/GRM3/GRIN3A/GRIN1/MAOA
hsa04611	Platelet activation	43/1928	124/8521	0.00139167	0.012201537	PRKCZ/PIK3CD/APBB1IP/PRKG1/GUCY1A2/ARHGEF12/PLCB3/RASGRP2/VWF/RAP1B/PPP1R12A/AKT1/ADCY4/PLCB2/PLA2G4E/PLA2G4D/PLCG2/ITGA2B/PIK3R5/ARHGEF1/VASP/PTGIR/ADCY3/VAMP8/GNAS/ADCY5/MYLK/PIK3CB/GP5/GNAI2/PRKG2/LCP2/ADCY2/FYN/ITPR3/MAPK13/PIK3CG/ACTB/GNAI1/ADCY8/LYN/PTGS1/SYK
hsa04974	Protein digestion and absorption	37/1928	103/8521	0.00142473	0.012201537	ATP1A2/ATP1A4/CELA3B/COL8A2/COL24A1/COL17A1/COL13A1/SLC3A2/SLC36A4/SLC38A2/COL4A1/COL4A2/SLC15A1/SLC7A8/SLC8A3/ATP1B2/SLC1A5/SLC8A2/COL5A3/DPP4/COL5A2/COL6A3/COL20A1/COL18A1/COL6A5/COL6A6/MME/SLC36A2/SLC36A1/COL23A1/KCNK5/COL21A1/COL19A1/COL26A1/COL28A1/ELN/COL14A1
hsa00230	Purine metabolism	44/1928	128/8521	0.001505637	0.012572072	AMPD2/PRUNE1/NPR1/AK2/PGM1/AK4/AK5/NT5C2/ADK/PAPSS2/ENTPD1/AMPD3/GUCY1A2/PDE2A/ADCY4/PDE8A/NME3/NT5M/GUCY2D/PDE4A/PDE4C/PDE11A/ADCY3/XDH/ITPA/ADA2/ADCY5/ENTPD3/FHIT/PAPSS1/DCK/ADCY2/PDE8B/AK9/GMPR/PDE10A/IMPDH1/PDE1C/ADCY8/PDE7A/ENTPD2/ENTPD8/GDA/GUCY2F
hsa04014	Ras signaling pathway	73/1928	236/8521	0.001743317	0.014201652	NTRK1/RASAL2/PLA2G2A/PLA2G2C/RASSF5/PIK3CD/FGF8/FGFR2/HTR7/PDGFD/ETS1/RRAS2/BDNF/RASGRP2/FGF19/FGF4/PAK1/RASAL1/KSR2/GRIN2B/FGF23/FGF6/NTF3/RAP1B/FLT3/FLT1/AKT1/PGF/PAK6/BUB1B-PAK6/PLA2G4E/PLA2G4D/MAP2K1/RASGRF1/GRIN2A/PRKCB/GNG13/PLCG2/GNGT2/NGFR/PRKCA/RASAL3/RASGRP4/PAK4/FLT3LG/PRKCG/RALB/ANGPT4/PLA2G3/RAC2/PLA2G6/PDGFB/PLA1A/MRAS/PIK3CB/FGF2/PDGFRA/MAPK10/EFNA5/FGF1/FGF18/FGFR4/AFDN/VEGFA/PDGF…
hsa04950	Maturity onset diabetes of the young	13/1928	26/8521	0.00200602	0.015952636	NR5A2/HHEX/PAX6/HNF1A/ONECUT1/FOXA3/NKX2-2/NKX6-1/RFX6/PAX4/BHLHA15/MAFA/HNF4G
hsa04925	Aldosterone synthesis and secretion	35/1928	98/8521	0.002119291	0.016461472	NPR1/ATP1A2/ATP1A4/CAMK1G/PLCB3/PDE2A/SCARB1/CACNA1C/NR4A1/ADCY4/PLCB2/PRKCB/PRKCA/ATP1B2/GNA11/PRKD2/PRKCG/NR4A2/ATF2/ADCY3/POMC/GNAS/CACNA1I/ATP2B2/ADCY5/CAMK2D/CAMK4/CAMK2A/ADCY2/ITPR3/CREB3L2/CAMK2B/DAGLB/ADCY8/CACNA1F
hsa04270	Vascular smooth muscle contraction	45/1928	134/8521	0.002274788	0.016940802	NPPB/NPR1/PLA2G2A/PLA2G2C/PRKG1/KCNMA1/GUCY1A2/ARHGEF12/CALCB/CALCA/PLCB3/CACNA1C/PPP1R12A/ADCY4/PRKCH/PLCB2/PLA2G4E/PLA2G4D/MAP2K1/PRKCB/ADORA2B/RAMP2/PRKCA/GNA11/PPP1R14A/ARHGEF1/PTGIR/PRKCG/PPP1R12C/ADCY3/AVP/ADRA1D/GNAS/ADORA2A/PLA2G3/MYH9/PLA2G6/ADM2/ADCY5/MYLK/ADCY2/ITPR3/GNA12/ADCY8/CACNA1F
hsa04540	Gap junction	32/1928	88/8521	0.002318936	0.016940802	PRKG1/PDGFD/GUCY1A2/PLCB3/GRM5/TUBA1B/ADCY4/PLCB2/MAP2K1/PRKCB/PRKCA/TUBB6/GNA11/PRKCG/TUBA4A/ADCY3/GNAS/PDGFB/ADCY5/GNAI2/PDGFRA/PRKG2/DRD1/ADCY2/GJA1/GRM1/TUBB2A/ITPR3/PDGFA/EGFR/GNAI1/ADCY8
hsa04972	Pancreatic secretion	36/1928	102/8521	0.002333164	0.016940802	ATP1A2/ATP1A4/PLA2G2A/PLA2G2C/CELA3B/RYR2/CHRM3/SLC9A1/CLCA1/PNLIPRP2/KCNMA1/PLCB3/TPCN2/ATP2A2/RAP1B/ADCY4/PLCB2/RAB11A/PRKCB/ATP2A3/PRKCA/ATP1B2/PRKCG/SCTR/ADCY3/GNAS/PLA2G3/ATP2B2/ADCY5/CCK/BST1/ADCY2/ITPR3/CFTR/SLC4A2/ADCY8
hsa04923	Regulation of lipolysis in adipocytes	23/1928	58/8521	0.00260264	0.018495359	NPR1/PTGS2/ADORA1/PIK3CD/PRKG1/AKT1/ADCY4/ADCY3/GNAS/ADCY5/MGLL/PIK3CB/GNAI2/CIDEC/NPY1R/PRKG2/ADRB2/ADCY2/NPY/GNAI1/ADCY8/ADRB3/PTGS1
hsa05031	Amphetamine addiction	26/1928	69/8521	0.003288236	0.022880639	SIRT1/GRIA4/TH/GRIN2B/CACNA1C/FOS/GRIN2A/PRKCB/PPP1R1B/PRKCA/GRIN2C/GRIN2D/PRKCG/ATF2/GNAS/ADCY5/CAMK2D/CAMK4/CAMK2A/DRD1/CREB3L2/CAMK2B/ARC/GRIN3A/GRIN1/MAOA
hsa04370	VEGF signaling pathway	23/1928	59/8521	0.003368233	0.022958975	CASP9/SH2D2A/PTGS2/MAPKAPK2/PIK3CD/PXN/AKT1/PLA2G4E/PLA2G4D/MAP2K1/PRKCB/PLCG2/PRKCA/SPHK1/PRKCG/NFATC2/RAC2/PIK3CB/MAPKAPK3/MAPK13/VEGFA/HSPB1/PTK2
hsa00561	Glycerolipid metabolism	24/1928	63/8521	0.003944721	0.026016453	AKR1A1/PLPP3/GPAM/PNLIPRP2/DGKZ/MOGAT2/DGKA/DGKH/LIPC/PLPP2/LPIN1/MOGAT1/LCLAT1/LPIN3/MGLL/DGKG/DGKQ/PLPP1/MOGAT3/DGKI/AGK/DGKB/GPAT4/AGPAT5
hsa04961	Endocrine and other factor-regulated calcium reabsorption	21/1928	53/8521	0.003972572	0.026016453	ATP1A2/ATP1A4/PTH/PLCB3/AP2A2/VDR/SLC8A3/PLCB2/RAB11A/PRKCB/PRKCA/ATP1B2/SLC8A2/AP2A1/PRKCG/GNAS/ATP2B2/PTH1R/ESR1/CALB1/DNM1
hsa04960	Aldosterone-regulated sodium reabsorption	16/1928	37/8521	0.004160189	0.026721214	ATP1A2/ATP1A4/SFN/PIK3CD/KCNJ1/SCNN1A/SCNN1B/PRKCB/HSD11B2/PRKCA/ATP1B2/NEDD4L/PRKCG/PIK3CB/NR3C2/SGK1
hsa04720	Long-term potentiation	25/1928	67/8521	0.004536557	0.02858887	RPS6KA1/PLCB3/GRM5/GRIN2B/CACNA1C/RAPGEF3/RAP1B/PLCB2/MAP2K1/GRIN2A/PRKCB/PRKCA/GRIN2C/GRIN2D/PRKCG/EP300/CAMK2D/CAMK4/CAMK2A/GRM1/RPS6KA2/ITPR3/CAMK2B/ADCY8/GRIN1
hsa05165	Human papillomavirus infection	95/1928	331/8521	0.005103236	0.031564459	LAMC2/PTGS2/PRKCZ/WNT3A/HEYL/HES3/HES2/PIK3CD/TCF7L2/PPP2R2D/PARD3/PTEN/TCIRG1/CCND1/DLG2/PXN/OASL/WNT10B/ITGB7/ITGA7/VWF/TNFRSF1A/COL4A1/COL4A2/FOXO1/PPP2R5C/TRAF3/AKT1/PALS1/PSEN1/PSMC1/MAP2K1/ITGA11/TUBG1/ITGA2B/FZD2/ITGA3/CHAD/AXIN2/LLGL2/ITGB4/TP53/TYK2/APC2/NOTCH3/CRB3/ITGA6/FZD7/WNT6/COL6A3/ATP6V1B1/TCF7L1/RBPJL/GNAS/LAMA5/IFNAR1/MX2/MFNG/EP300/WNT7B/ITGB5/COL6A5/COL6A6/PIK3CB/MAGI1/TLR3/P…
hsa04927	Cortisol synthesis and secretion	24/1928	65/8521	0.006240835	0.037191933	PBX1/KCNK2/KCNA4/PLCB3/SCARB1/CACNA1C/NR4A1/ADCY4/PLCB2/PDE8A/GNA11/ATF2/ADCY3/POMC/GNAS/CACNA1I/ADCY5/ADCY2/PDE8B/ITPR3/CREB3L2/ADCY8/NR5A1/CACNA1F
hsa05218	Melanoma	26/1928	72/8521	0.006347126	0.037191933	E2F2/PIK3CD/FGF8/PTEN/PDGFD/CCND1/FGF19/FGF4/FGF23/FGF6/AKT1/MAP2K1/CDH1/TP53/GADD45B/PDGFB/PIK3CB/FGF2/PDGFRA/FGF1/FGF18/PDGFA/EGFR/CDK6/FGFR1/CDKN2A
hsa05223	Non-small cell lung cancer	26/1928	72/8521	0.006347126	0.037191933	CASP9/RASSF5/E2F2/PIK3CD/KIF5B/CCND1/AKT1/MAP2K1/PRKCB/PLCG2/ERBB2/STAT3/PRKCA/TP53/JAK3/GADD45B/PRKCG/ALK/PIK3CB/RARB/FHIT/FOXO3/EGFR/CDK6/RXRA/CDKN2A
hsa04726	Serotonergic synapse	38/1928	115/8521	0.00647622	0.037294092	KCNJ9/PTGS2/HTR6/CYP4X1/CYP2J2/HTR7/HTR3B/HTR3A/PLCB3/CACNA1C/RAPGEF3/TPH2/GABRB3/PLCB2/PLA2G4E/PLA2G4D/MAP2K1/PRKCB/GNG13/ALOX15/GNGT2/PRKCA/ALOX12/ALOX12B/PRKCG/GNAS/APP/ADCY5/GNAI2/KCNN2/HTR4/HTR1A/ITPR3/GNAI1/PTGS1/CACNA1B/MAOA/CACNA1F
hsa05231	Choline metabolism in cancer	33/1928	98/8521	0.007847395	0.044335139	PLPP3/SLC44A5/PIK3CD/PDGFD/DGKZ/DGKA/DGKH/AKT1/FOS/PLA2G4E/PLA2G4D/MAP2K1/PRKCB/PRKCA/PLPP2/PIP5K1C/PRKCG/SLC5A7/RAC2/PDGFB/PIK3CB/DGKG/PDGFRA/MAPK10/DGKQ/PLPP1/DGKI/DGKB/PDGFA/EGFR/EIF4EBP1/RALGDS/WAS
hsa04935	Growth hormone synthesis, secretion and action	39/1928	120/8521	0.007964396	0.044335139	PIK3CD/PLCB3/CACNA1C/AKT1/ADCY4/SSTR1/FOS/PLCB2/MAP2K1/PRKCB/BCAR1/PLCG2/STAT3/GH2/GH1/PRKCA/MAP2K6/SOCS3/GNA11/PRKCG/ATF2/ADCY3/GNAS/EP300/ADCY5/PIK3CB/GHSR/SST/GNAI2/MAPK10/ADCY2/ITPR3/MAPK13/CREB3L2/GHRHR/GNAI1/ADCY8/PTK2/CACNA1F

## Sheet: kegg.list_of_genes_in_cluster_2
ID	Description	GeneRatio	BgRatio	pvalue	p.adjust	qvalue	geneID
hsa04360	Axon guidance	53/767	182/8521	3.00E-15	9.58E-13	7.52E-13	EPHA2/SRGAP2/PRKCZ/PLXNA2/EPHB2/ABLIM1/NRP1/SLIT1/WNT5B/PLXNC1/EFNB2/TRPC4/SEMA6D/NEO1/PLCG2/DCC/EFNA2/EPHA4/NGEF/DPYSL5/SRC/PARD6B/BMP7/LIMK2/BOC/PLXNA1/EPHB1/EPHB3/SEMA3F/GNAI2/ROBO2/ROBO1/SRGAP3/PPP3CA/ABLIM2/BMPR1B/UNC5C/EFNA5/SEMA6A/CAMK2A/SLIT3/UNC5A/PIK3R1/SEMA5A/FYN/PLXNA4/SEMA3A/SEMA3D/UNC5D/RGS3/PTCH1/PAK3/L1CAM
hsa04390	Hippo signaling pathway	41/767	157/8521	1.99E-10	3.18E-08	2.49E-08	WNT2B/CRB1/PRKCZ/WNT3A/BTRC/TCF7L2/BMPR1A/YAP1/PPP2R1B/TEAD1/CCND1/DLG2/WNT5B/CCND2/WNT1/FRMD6/PALS1/NKD1/LLGL1/AXIN2/DLG4/SMAD2/SMAD7/GLI2/FZD7/YWHAB/PARD6B/BMP7/NF2/WNT7A/CTNNB1/LEF1/PPP2R2C/BMPR1B/CTNNA1/PPP2R2B/WWC1/FBXW11/FRMD1/FZD1/CRB2
hsa04310	Wnt signaling pathway	42/767	171/8521	9.41E-10	1.00E-07	7.86E-08	WNT2B/VANGL1/VANGL2/WNT3A/RSPO1/ROR1/BTRC/TCF7L2/LGR4/CCND1/WNT5B/PRICKLE1/CCND2/WNT1/DAAM1/PLCB2/TLE3/NKD1/AXIN2/PRKCG/FZD7/PLCB4/ZNRF3/RUVBL1/WNT7A/CTNNB1/PRICKLE2/PPP3CA/CXXC4/LEF1/SFRP2/MAPK10/CTNND2/CAMK2A/FBXW11/MAP3K7/FZD1/SFRP1/INVS/TLE4/TLE1/GPC4
hsa04713	Circadian entrainment	27/767	97/8521	6.10E-08	4.87E-06	3.82E-06	NOS1AP/GNG4/GNB3/GNG2/RYR3/PLCB2/CACNA1H/ADCY7/GRIN2A/CACNA1G/GRIN2C/PER1/PRKCG/PER2/CALM2/PLCB4/KCNJ6/CACNA1I/ADCY5/GNB4/GNAI2/CACNA1D/GUCY1A1/MTNR1A/CAMK2A/GRIA1/GNB2
hsa04015	Rap1 signaling pathway	43/767	210/8521	1.89E-07	1.21E-05	9.47E-06	EPHA2/PRKCZ/SIPA1L2/FGFR2/FGF19/FGF3/EVL/PRKD1/PGF/PLCB2/IGF1R/ADCY7/BCAR1/GRIN2A/EFNA2/SIPA1L3/PRKCG/RAPGEF4/RASGRP3/CALM2/SRC/PARD6B/PLCB4/TIAM1/ADORA2A/PDGFB/MAPK11/ADCY5/CTNNB1/GNAI2/MAGI1/EGF/EFNA5/CSF1R/FGF18/PIK3R1/VEGFA/EGFR/MAGI2/ANGPT1/ANGPT2/RAPGEF1/VAV2
hsa04151	PI3K-Akt signaling pathway	59/767	354/8521	1.93E-06	0.000102389	8.04E-05	EPHA2/LAMC1/GNG4/FGFR2/PPP2R1B/CCND1/FGF19/FGF3/HSP90B1/CCND2/COL2A1/GNB3/GNG2/PGF/IGF1R/TSC2/CD19/RPTOR/PHLPP1/EFNA2/ITGAV/ERBB4/IRS1/YWHAB/PDGFB/COL6A5/GNB4/ITGA9/MAGI1/EGF/PPP2R2C/EIF4E/EFNA5/PPP2R2B/CSF1R/FGF18/PRLR/ITGA1/PIK3R1/LAMA2/SGK1/PRL/VEGFA/GNB2/RELN/LAMB4/CREB3L2/RHEB/ITGB8/CREB5/EGFR/MAGI2/ANGPT1/ANGPT2/RXRA/JAK2/NTRK2/COL4A6/COL4A5
hsa04510	Focal adhesion	39/767	203/8521	3.72E-06	0.000169514	0.000133127	LAMC1/PPP1R12B/CAPN2/PARVA/CCND1/PXN/CCND2/COL2A1/PGF/IGF1R/BCAR1/PRKCG/PPP1R12C/ITGAV/SRC/PDGFB/MYLK/COL6A5/ITGA9/CTNNB1/EGF/MAPK10/ITGA1/PIK3R1/FYN/LAMA2/MYLK4/VEGFA/RELN/LAMB4/ITGB8/EGFR/RAPGEF1/VAV2/PIP5K1B/SHC3/COL4A6/COL4A5/PAK3
hsa04934	Cushing syndrome	32/767	155/8521	5.86E-06	0.000233616	0.00018347	WNT2B/PBX1/CACNA1S/WNT3A/TCF7L2/CCND1/SCARB1/WNT5B/WNT1/PLCB2/CACNA1H/ADCY7/CACNA1G/AIPL1/AXIN2/PDE11A/FZD7/POMC/PLCB4/CACNA1I/ADCY5/WNT7A/CTNNB1/GNAI2/CACNA1D/LEF1/CAMK2A/CREB3L2/CREB5/EGFR/FZD1/ASH2L
hsa04340	Hedgehog signaling pathway	15/767	56/8521	8.71E-05	0.002970263	0.002332693	HHAT/BTRC/CDON/CCND1/SCUBE2/CCND2/CSNK1G1/MEGF8/GLI2/LRP2/BOC/FBXW11/GLI3/GAS1/PTCH1
hsa04921	Oxytocin signaling pathway	29/767	154/8521	9.43E-05	0.002970263	0.002332693	CACNA1S/PPP1R12B/CCND1/PRKAB1/RYR3/PLCB2/MAP2K5/ADCY7/KCNJ12/CACNG4/PRKCG/PPP1R12C/CALM2/SRC/PLCB4/KCNJ6/ADCY5/MYLK/GNAI2/CACNA2D2/CACNA1D/CACNA2D3/PPP3CA/GUCY1A1/CAMK2A/MYLK4/PRKAG2/EGFR/CACNA2D1
hsa05217	Basal cell carcinoma	16/767	63/8521	0.000102423	0.002970263	0.002332693	WNT2B/WNT3A/GADD45A/TCF7L2/WNT5B/WNT1/AXIN2/GADD45B/GLI2/FZD7/WNT7A/CTNNB1/LEF1/GLI3/FZD1/PTCH1
hsa04014	Ras signaling pathway	39/767	236/8521	0.000130721	0.003474994	0.002729083	EPHA2/RASAL2/GNG4/FGFR2/ETS1/PLAAT2/FGF19/FGF3/KSR2/TBK1/GNB3/RASA3/GNG2/PGF/IGF1R/PLCG2/GRIN2A/RALBP1/EFNA2/PRKCG/RASGRP3/CALM2/TIAM1/PDGFB/GNB4/EGF/MAPK10/EFNA5/CSF1R/FGF18/PIK3R1/VEGFA/GNB2/EGFR/ANGPT1/ANGPT2/NTRK2/SHC3/PAK3
hsa04725	Cholinergic synapse	23/767	113/8521	0.000148037	0.003632602	0.00285286	CACNA1S/GNG4/CHRM3/GNB3/GNG2/PLCB2/ADCY7/KCNJ12/PRKCG/PLCB4/KCNJ6/ADCY5/GNB4/GNAI2/CACNA1D/CAMK2A/PIK3R1/FYN/GNB2/CREB3L2/CREB5/KCNQ3/JAK2
hsa05165	Human papillomavirus infection	50/767	331/8521	0.000163829	0.003732967	0.002931682	WNT2B/LAMC1/UBR4/PRKCZ/WNT3A/HES4/TCF7L2/PPP2R1B/CCND1/DLG2/MAML2/PXN/WNT5B/CCND2/COL2A1/WNT1/TBK1/PALS1/PKM/TSC2/LLGL1/AXIN2/SLC9A3R1/ITGAV/FZD7/JAG1/PARD6B/COL6A5/WNT7A/ITGA9/CTNNB1/MAGI1/EGF/PPP2R2C/PPP2R2B/ITGA1/PIK3R1/LAMA2/VEGFA/RELN/LAMB4/CREB3L2/RHEB/ITGB8/CREB5/EGFR/FZD1/NOTCH1/COL4A6/COL4A5
hsa04916	Melanogenesis	21/767	101/8521	0.000208064	0.004424822	0.003475029	WNT2B/WNT3A/TCF7L2/WNT5B/WNT1/DCT/PLCB2/ADCY7/PRKCG/FZD7/POMC/CALM2/PLCB4/ADCY5/WNT7A/CTNNB1/GNAI2/LEF1/CAMK2A/CREB3L2/FZD1
hsa04010	MAPK signaling pathway	46/767	301/8521	0.000226932	0.004524459	0.003553279	EPHA2/CACNA1S/MAPKAPK2/STMN1/MKNK1/GADD45A/FGFR2/FGF19/FGF3/PTPRR/PGF/MAP2K5/IGF1R/CACNA1H/MAPK8IP3/CACNA1G/CACNG4/EFNA2/GADD45B/PPP5C/PRKCG/MAP4K4/ERBB4/RASGRP3/PDGFB/CACNA1I/MAPK11/MECOM/CACNA2D2/CACNA1D/CACNA2D3/PPP3CA/EGF/MAPK10/EFNA5/CSF1R/FGF18/TAB2/VEGFA/MAP3K7/EGFR/HSPB1/CACNA2D1/ANGPT1/ANGPT2/NTRK2
hsa04728	Dopaminergic synapse	25/767	132/8521	0.000256528	0.004813664	0.003780406	GNG4/PPP2R1B/GNB3/GNG2/PLCB2/GRIN2A/PRKCG/KIF5C/CALM2/PLCB4/KCNJ6/MAPK11/ADCY5/GNB4/GNAI2/CACNA1D/PPP3CA/PPP2R2C/MAPK10/PPP2R2B/CAMK2A/GRIA1/GNB2/CREB3L2/CREB5
hsa04924	Renin secretion	16/767	69/8521	0.000320293	0.005676303	0.004457879	CACNA1S/EDN2/CLCA2/ADRB1/KCNMA1/PDE3A/PLCB2/ACE/CALM2/EDN3/PLCB4/ADCY5/GNAI2/CACNA1D/PPP3CA/GUCY1A1
hsa04925	Aldosterone synthesis and secretion	20/767	98/8521	0.000378962	0.006249021	0.004907662	CACNA1S/PDE2A/SCARB1/PRKD1/PLCB2/CACNA1H/ADCY7/CACNA1G/ATP1B2/PRKCG/POMC/CALM2/PLCB4/CACNA1I/ATP2B2/ADCY5/CACNA1D/CAMK2A/CREB3L2/CREB5
hsa05412	Arrhythmogenic right ventricular cardiomyopathy	17/767	77/8521	0.000391788	0.006249021	0.004907662	CACNA1S/TCF7L2/CACNG4/CDH2/ITGAV/ITGA9/CTNNB1/CACNA2D2/CACNA1D/CACNA2D3/LEF1/CTNNA1/SGCD/ITGA1/LAMA2/ITGB8/CACNA2D1
hsa04520	Adherens junction	19/767	93/8521	0.000518904	0.007882403	0.006190437	WASF2/PTPRF/SSX2IP/TCF7L2/NECTIN1/PTPRJ/WASF3/IGF1R/BAIAP2/PTPRM/SRC/HEG1/CTNNB1/LEF1/CTNNA1/FYN/MAP3K7/RADIL/EGFR
hsa04020	Calcium signaling pathway	39/767	253/8521	0.000562732	0.008159612	0.006408142	CACNA1S/ITPKB/CHRM3/ADRB1/FGFR2/P2RX3/FGF19/FGF3/BDKRB1/RYR3/PLCB2/NTRK3/CACNA1H/ADCY7/PLCG2/GRIN2A/PLCD3/CACNA1G/GRIN2C/PRKCG/ERBB4/CALM2/NTSR1/PLCB4/ADORA2A/PDGFB/CACNA1I/ATP2B2/MYLK/CACNA1D/PPP3CA/EGF/STIM2/CAMK2A/FGF18/MYLK4/VEGFA/EGFR/NTRK2
hsa05224	Breast cancer	26/767	147/8521	0.000591553	0.008204585	0.006443462	WNT2B/WNT3A/GADD45A/TCF7L2/CCND1/FGF19/FGF3/WNT5B/WNT1/ESR2/IGF1R/AXIN2/GADD45B/FZD7/JAG1/NCOA3/WNT7A/CTNNB1/LEF1/EGF/FGF18/PIK3R1/EGFR/FZD1/NOTCH1/SHC3
hsa05226	Gastric cancer	26/767	149/8521	0.000730843	0.009714115	0.00762897	WNT2B/WNT3A/GADD45A/TCF7L2/FGFR2/CCND1/FGF19/FGF3/WNT5B/WNT1/AXIN2/SMAD2/GADD45B/FZD7/WNT7A/RARB/CTNNB1/LEF1/EGF/CTNNA1/FGF18/PIK3R1/EGFR/FZD1/RXRA/SHC3
hsa04727	GABAergic synapse	18/767	89/8521	0.00081811	0.010439082	0.008198322	CACNA1S/GNG4/GAD2/SLC6A13/GLS2/GNB3/GNG2/GABRG3/ADCY7/ABAT/PRKCG/SRC/KCNJ6/ADCY5/GNB4/GNAI2/CACNA1D/GNB2
hsa04024	cAMP signaling pathway	35/767	225/8521	0.00089999	0.01104219	0.008671972	CACNA1S/EDN2/PDE4B/ADRB1/PDE3A/ABCC4/GPHB5/TSHR/ADCY7/CNGB1/GRIN2A/GRIN2C/ATP1B2/HCN2/RAPGEF4/POMC/CALM2/EDN3/TIAM1/ADORA2A/ATP2B2/ADCY5/GNAI2/CACNA1D/ACOX3/MAPK10/CAMK2A/GRIA1/PDE4D/PIK3R1/CREB3L2/CREB5/GLI3/VAV2/PTCH1
hsa04926	Relaxin signaling pathway	23/767	129/8521	0.001071815	0.012663301	0.00994511	PRKCZ/GNG4/GNB3/GNG2/PLCB2/ADCY7/SMAD2/SRC/PLCB4/MAPK11/ADCY5/GNB4/GNAI2/MAPK10/PIK3R1/VEGFA/GNB2/CREB3L2/CREB5/EGFR/SHC3/COL4A6/COL4A5
hsa04261	Adrenergic signaling in cardiomyocytes	26/767	154/8521	0.001210578	0.013791948	0.010831492	CACNA1S/ADRB1/PPP2R1B/MYH7/PLCB2/TPM1/ADCY7/CACNG4/ATP1B2/RAPGEF4/CALM2/PLCB4/MAPK11/ATP2B2/ADCY5/SCN5A/GNAI2/CACNA2D2/CACNA1D/CACNA2D3/PPP2R2C/PPP2R2B/CAMK2A/CREB3L2/CREB5/CACNA2D1
hsa04929	GnRH secretion	14/767	64/8521	0.001375183	0.015127015	0.011879985	KCNN3/CACNA1S/TRPC4/ESR2/PLCB2/CACNA1H/CACNA1G/PRKCG/HCN2/PLCB4/KCNJ6/CACNA1I/CACNA1D/PIK3R1
hsa04927	Cortisol synthesis and secretion	14/767	65/8521	0.001610926	0.01712951	0.013452642	PBX1/CACNA1S/SCARB1/PLCB2/CACNA1H/ADCY7/CACNA1G/POMC/PLCB4/CACNA1I/ADCY5/CACNA1D/CREB3L2/CREB5
hsa04022	cGMP-PKG signaling pathway	27/767	167/8521	0.001901741	0.019569528	0.015368908	CACNA1S/ADRB1/KCNMA1/IRAG1/PDE2A/PDE3A/MYH7/PLCB2/ADCY7/CNGB1/ATP1B2/IRS1/CALM2/PLCB4/ATP2B2/ADCY5/MYLK/GNAI2/CACNA1D/PPP3CA/PDE5A/GUCY1A1/ADRA2C/MYLK4/CREB3L2/CREB5/GTF2IRD1
hsa04550	Signaling pathways regulating pluripotency of stem cells	24/767	143/8521	0.00199546	0.019892237	0.015622348	WNT2B/LEFTY1/WNT3A/FGFR2/BMPR1A/PAX6/WNT5B/WNT1/IGF1R/ZFHX3/AXIN2/SMAD2/INHBB/FZD7/MEIS1/MAPK11/WNT7A/CTNNB1/BMPR1B/PIK3R1/FZD1/POU5F1B/KAT6A/JAK2
hsa00230	Purine metabolism	22/767	128/8521	0.002218299	0.021443561	0.016840678	AK4/PDE4B/NT5C2/PAPSS2/PDE2A/PDE3A/ADCY7/NT5M/RRM2/PDE11A/PDE9A/ADCY5/FHIT/PAPSS1/PDE5A/GUCY1A1/PDE4D/PDE7B/GMPR/ENTPD4/AK8/GUCY2F
hsa04919	Thyroid hormone signaling pathway	21/767	121/8521	0.002448133	0.022444644	0.017626878	CCND1/MED13L/PFKM/TBC1D4/MYH7/PLCB2/TSC2/PLCG2/PLCD3/ATP1B2/PRKCG/ITGAV/SRC/NCOA3/PLCB4/CTNNB1/PIK3R1/RHEB/NCOA2/RXRA/NOTCH1
hsa05410	Hypertrophic cardiomyopathy	17/767	90/8521	0.002462578	0.022444644	0.017626878	CACNA1S/PRKAB1/MYH7/TPM1/ACE/CACNG4/ITGAV/ITGA9/CACNA2D2/CACNA1D/CACNA2D3/SGCD/ITGA1/LAMA2/PRKAG2/ITGB8/CACNA2D1
hsa05032	Morphine addiction	17/767	91/8521	0.0027815	0.02464718	0.019356637	GNG4/PDE4B/PDE2A/PDE3A/GNB3/GNG2/GABRG3/ADCY7/PRKCG/PDE11A/KCNJ6/ADCY5/GNB4/GNAI2/PDE4D/PDE7B/GNB2
hsa04724	Glutamatergic synapse	20/767	115/8521	0.002994713	0.025819281	0.020277145	GNG4/SHANK2/GLS2/GNB3/GNG2/PLCB2/ADCY7/GRIN2A/DLG4/GRIN2C/PRKCG/PLCB4/ADCY5/GNB4/GNAI2/CACNA1D/PPP3CA/GRIA1/HOMER1/GNB2
hsa00534	Glycosaminoglycan biosynthesis - heparan sulfate / heparin	7/767	24/8521	0.004119027	0.034507359	0.027100318	EXTL1/XYLT1/HS3ST3A1/HS6ST1/NDST4/HS3ST5/EXT1
hsa05225	Hepatocellular carcinoma	26/767	168/8521	0.004218768	0.034507359	0.027100318	WNT2B/WNT3A/ARID1A/GADD45A/TCF7L2/CCND1/WNT5B/WNT1/DPF3/IGF1R/PLCG2/AXIN2/SMAD2/GADD45B/PRKCG/FZD7/TXNRD2/WNT7A/CTNNB1/LEF1/MGST2/PIK3R1/ARID1B/EGFR/FZD1/SHC3
hsa04540	Gap junction	16/767	88/8521	0.004825433	0.038394515	0.030153092	ADRB1/TUBA1A/TUBA1C/PLCB2/MAP2K5/ADCY7/PRKCG/SRC/PLCB4/PDGFB/ADCY5/GNAI2/EGF/GUCY1A1/EGFR/TUBB4B
hsa05414	Dilated cardiomyopathy	17/767	96/8521	0.004934718	0.038394515	0.030153092	CACNA1S/ADRB1/MYH7/TPM1/ADCY7/CACNG4/ITGAV/ADCY5/ITGA9/CACNA2D2/CACNA1D/CACNA2D3/SGCD/ITGA1/LAMA2/ITGB8/CACNA2D1
hsa05205	Proteoglycans in cancer	30/767	205/8521	0.005150291	0.039117689	0.030721036	WNT2B/PPP1R12B/WNT3A/CCND1/PXN/WNT5B/WNT1/IGF1R/PLCG2/SMAD2/PRKCG/PPP1R12C/ITGAV/SDC1/FZD7/ERBB4/SRC/TIAM1/MAPK11/WNT7A/CTNNB1/HBEGF/CAMK2A/DROSHA/PIK3R1/VEGFA/EGFR/FZD1/VAV2/PTCH1
hsa04512	ECM-receptor interaction	16/767	89/8521	0.005406404	0.040107977	0.031498758	SV2A/LAMC1/COL2A1/ITGAV/SDC1/COL6A5/ITGA9/ITGA1/SV2C/LAMA2/RELN/LAMB4/ITGB8/FREM1/COL4A6/COL4A5
hsa01522	Endocrine resistance	17/767	98/8521	0.006110708	0.042709501	0.033541862	CCND1/ESR2/IGF1R/ADCY7/CARM1/JAG1/SRC/NCOA3/BIK/MAPK11/ADCY5/MAPK10/HBEGF/PIK3R1/EGFR/NOTCH1/SHC3
hsa04928	Parathyroid hormone synthesis, secretion and action	18/767	106/8521	0.006113342	0.042709501	0.033541862	PDE4B/GATA3/KL/PLCB2/AKAP13/ADCY7/SLC9A3R1/PRKCG/PLCB4/ADCY5/GNAI2/SLC34A2/HBEGF/PDE4D/CREB3L2/CREB5/EGFR/RXRA
hsa04371	Apelin signaling pathway	22/767	139/8521	0.006212164	0.042709501	0.033541862	GNG4/APLNR/CCND1/MAP1LC3B2/PRKAB1/GNB3/GNG2/RYR3/PLCB2/ADCY7/SMAD2/HDAC4/CALM2/JAG1/PLCB4/ADCY5/MYLK/GNB4/GNAI2/MYLK4/GNB2/PRKAG2
hsa04150	mTOR signaling pathway	24/767	156/8521	0.006292622	0.042709501	0.033541862	WNT2B/WNT3A/PRR5L/WNT5B/WNT1/IGF1R/TSC2/RPTOR/LPIN2/RNF152/PRKCG/FZD7/IRS1/WNT7A/FNIP2/EIF4E/SLC38A9/PIK3R1/TBC1D7/SGK1/RHEB/GRB10/FZD1/MAPKAP1
hsa04514	Cell adhesion molecules	24/767	158/8521	0.007375529	0.049016538	0.038495086	NFASC/CNTN2/SDC3/PTPRF/NCAM1/CADM1/NECTIN1/NRXN2/CD4/NRXN3/NEO1/CDH2/PTPRM/PTPRS/ITGAV/SDC1/CTLA4/CDH4/CLDN1/ITGA9/NRCAM/CNTNAP2/ITGB8/L1CAM
hsa05202	Transcriptional misregulation in cancer	28/767	193/8521	0.007580855	0.049352912	0.038759258	ZBTB17/PBX1/PAX7/SLC45A3/GADD45A/ZBTB16/LMO2/ETV6/CCND2/IGF1R/BAIAP3/RARA/SS18/GADD45B/MLLT1/MYCN/PAX3/PER2/MEIS1/RUNX1/NSD2/CSF1R/ETV1/CDK14/EYA1/PBX3/RXRA/MLLT3

## Sheet: kegg.list_of_genes_in_cluster_3
ID	Description	GeneRatio	BgRatio	pvalue	p.adjust	qvalue	geneID
hsa04360	Axon guidance	38/685	182/8521	3.09E-08	1.01E-05	8.43E-06	SRGAP2/PLXNA2/EPHB2/ABLIM1/PARD3/CXCL12/WNT5B/SEMA6D/MYL12B/DCC/CXCR4/EPHA4/DPYSL5/BMP7/MAPK1/BOC/SEMA5B/PLXNA1/RYK/EPHA3/CAMK2D/SLIT2/BMPR1B/UNC5C/EFNA5/SEMA6A/SLIT3/FYN/EPHA7/MET/LRRC4/SEMA3C/SEMA3A/PTK2/DPYSL2/RGS3/PTCH1/PAK3
hsa04724	Glutamatergic synapse	25/685	115/8521	3.36E-06	0.000547854	0.000458166	GRIK3/SLC1A7/GRIA4/SHANK2/GRIN2B/CACNA1C/SLC38A1/HOMER2/ADCY7/GNAO1/GRIN2C/DLGAP1/CACNA1A/PLCB1/PLCB4/MAPK1/PLD1/ITPR1/CACNA1D/GRIA2/GRIA1/SLC1A3/GRIK2/PRKACG/GNAQ
hsa04024	cAMP signaling pathway	37/685	225/8521	1.97E-05	0.001766135	0.001477007	VAV3/ATP2B4/ADRB1/GRIA4/ATP2A2/ORAI1/GRIN2B/PDE3A/CACNA1C/ATP2B1/ABCC4/AKT1/ADCY7/GRIN2C/NFATC1/GIPR/RAPGEF4/LHCGR/CNGA3/TIAM1/MAPK1/POPDC2/PLD1/CACNA1D/NFKB1/CAMK2D/GRIA2/GRIA1/PDE10A/HTR1E/BRAF/CREB5/GLI3/CNGB3/PRKACG/PTCH1/GABBR2
hsa04713	Circadian entrainment	21/685	97/8521	2.17E-05	0.001766135	0.001477007	NOS1AP/GRIA4/GUCY1A2/MTNR1B/GRIN2B/CACNA1C/RPS6KA5/ADCY7/GNAO1/GRIN2C/PER2/PLCB1/PLCB4/MAPK1/ITPR1/CACNA1D/CAMK2D/GRIA2/GRIA1/PRKACG/GNAQ
hsa04020	Calcium signaling pathway	39/685	253/8521	5.32E-05	0.003468176	0.002900412	CASQ2/ATP2B4/ITPKB/ADRB1/CAMK1D/ATP2A2/ORAI1/GRIN2B/CACNA1C/ATP2B1/HTR2A/CYSLTR2/NTRK3/PHKB/ADCY7/GRIN2C/NFATC1/CACNA1A/CXCR4/PDE1A/ERBB4/SLC8A1/LHCGR/TGFA/PLCB1/PLCB4/ITPR1/CACNA1D/CAMK2D/PDGFC/STIM2/KDR/MYLK4/MET/PDE1C/PRKACG/GNAQ/NTRK2/GRPR
hsa04510	Focal adhesion	33/685	203/8521	6.95E-05	0.003775293	0.003157252	VAV3/LAMC1/PPP1R12B/COL9A2/VCL/PARVA/AKT1/ACTN1/IGF1R/MYL12B/BCL2/LAMA1/ARHGAP35/ITGA6/ITGAV/COL4A3/COL6A1/MAPK1/PARVB/COL6A6/ITGA9/PDGFC/KDR/SPP1/FYN/MYLK4/COL9A1/MET/BRAF/ITGB8/PTK2/PIP5K1B/PAK3
hsa04310	Wnt signaling pathway	28/685	171/8521	0.00021398	0.00996536	0.008333963	BTRC/TCF7L2/CTBP2/BAMBI/CSNK2A3/LRP6/WNT5B/TLE3/NKD1/SOST/AXIN2/NFATC1/PLCB1/PLCB4/ZNRF3/RYK/SENP2/PRICKLE2/CAMK2D/SFRP2/CTNND2/CSNK1A1/FBXW11/FZD1/PRKACG/TLE4/TLE1/TBL1X
hsa04330	Notch signaling pathway	14/685	62/8521	0.000316698	0.012905454	0.010792743	CTBP2/DTX4/MAML2/NCOR2/APH1B/TLE3/JAG1/ITCH/KAT2B/MAML3/RBPJ/HEY1/TLE4/TLE1
hsa04261	Adrenergic signaling in cardiomyocytes	25/685	154/8521	0.000524476	0.017958582	0.01501864	ATP2B4/ADRB1/KCNQ1/ATP2A2/CACNA1C/ATP2B1/AKT1/MYH7/RPS6KA5/TPM1/ADCY7/BCL2/RAPGEF4/SLC8A1/PLCB1/PLCB4/MAPK1/POPDC2/MYL3/CACNA1D/CAMK2D/CREB5/CACNA2D1/PRKACG/GNAQ
hsa05414	Dilated cardiomyopathy	18/685	96/8521	0.000550877	0.017958582	0.01501864	LMNA/ADRB1/ATP2A2/CACNA1C/MYH7/TPM1/ADCY7/LAMA1/ITGA6/ITGAV/SLC8A1/ITGA9/MYL3/CACNA1D/ITGB8/CACNA2D1/PRKACG/DMD
hsa04730	Long-term depression	13/685	60/8521	0.000783025	0.021351827	0.017856387	GUCY1A2/IGF1R/GNAO1/CACNA1A/PLCB1/PLCB4/MAPK1/ITPR1/GRIA2/GRID2/GRIA1/BRAF/GNAQ
hsa04022	cGMP-PKG signaling pathway	26/685	167/8521	0.000785957	0.021351827	0.017856387	RGS2/ATP2B4/ADRB1/IRAG1/GUCY1A2/ATP2A2/PDE3A/CACNA1C/ATP2B1/AKT1/MYH7/ADCY7/NFATC1/IRS1/SLC8A1/PRKCE/PLCB1/PLCB4/MAPK1/ITPR1/CACNA1D/KCNMB1/MYLK4/CREB5/GTF2IRD1/GNAQ
hsa05412	Arrhythmogenic right ventricular cardiomyopathy	15/685	77/8521	0.001036973	0.026004085	0.021747039	LMNA/TCF7L2/ATP2A2/CACNA1C/CDH2/LAMA1/ITGA6/ITGAV/SLC8A1/ITGA9/CACNA1D/DSP/ITGB8/CACNA2D1/DMD
hsa04514	Cell adhesion molecules	24/685	158/8521	0.00174167	0.037970484	0.031754457	NFASC/CNTN2/CD34/NCAM1/CADM1/GLG1/CDH2/CD226/PTPRM/LRRC4B/ITGA6/ITGAV/SDC1/ICOS/ALCAM/IGSF11/NLGN1/ITGA9/VCAN/LRRC4/ITGB8/SDC2/PTPRD/CD40LG
hsa04512	ECM-receptor interaction	16/685	89/8521	0.001747108	0.037970484	0.031754457	LAMC1/COL9A2/FREM2/LAMA1/ITGA6/ITGAV/SDC1/COL4A3/COL6A1/COL6A6/ITGA9/FRAS1/SPP1/COL9A1/ITGB8/FREM1
hsa05410	Hypertrophic cardiomyopathy	16/685	90/8521	0.001970745	0.040153933	0.03358046	LMNA/ATP2A2/CACNA1C/MYH7/TPM1/LAMA1/ITGA6/ITGAV/SLC8A1/ITGA9/MYL3/CACNA1D/PRKAG2/ITGB8/CACNA2D1/DMD
hsa04720	Long-term potentiation	13/685	67/8521	0.002281998	0.043760671	0.036596751	GRIN2B/CACNA1C/GRIN2C/PLCB1/PLCB4/MAPK1/ITPR1/CAMK2D/GRIA2/GRIA1/BRAF/PRKACG/GNAQ
hsa05222	Small cell lung cancer	16/685	92/8521	0.002490171	0.045099765	0.037716626	RXRG/LAMC1/TRAF6/TRAF3/AKT1/MAX/BCL2/LAMA1/ITGA6/ITGAV/COL4A3/RARB/NFKB1/SKP2/CDK6/PTK2
hsa04924	Renin secretion	13/685	69/8521	0.002996133	0.048787612	0.040800748	ADRB1/GUCY1A2/ORAI1/PDE3A/CACNA1C/PDE1A/PLCB1/PLCB4/ITPR1/CACNA1D/PDE1C/PRKACG/GNAQ
hsa05031	Amphetamine addiction	13/685	69/8521	0.002996133	0.048787612	0.040800748	GRIA4/GRIN2B/CACNA1C/GRIN2C/FOSB/CACNA1D/CAMK2D/GRIA2/GRIA1/CREB5/SLC18A1/PRKACG/MAOB
hsa05202	Transcriptional misregulation in cancer	27/685	193/8521	0.00314276	0.048787612	0.040800748	PBX1/RXRG/BMI1/ATM/ZBTB16/DUSP6/MAX/IGF1R/MLLT1/PAX8/PER2/SS18L1/RUNX1/ERG/BCL6/MITF/NFKB1/PROM1/AFF1/CSF1R/MET/ETV1/CDK14/PTK2/EYA1/PBX3/MLLT3

## Sheet: kegg.list_of_genes_in_cluster_4
ID	Description	GeneRatio	BgRatio	pvalue	p.adjust	qvalue	geneID
hsa04360	Axon guidance	50/855	182/8521	1.44E-11	4.65E-09	3.08E-09	EFNA3/EFNA1/SEMA4A/PLXNA2/WNT4/ENAH/EPHB2/ABLIM1/ITGB1/NRP1/CAMK2G/ARHGEF12/SSH1/SRGAP1/PLXNC1/PAK6/SEMA6D/MAPK3/NTN1/PIK3R2/NCK2/BMPR2/EPHA4/PARD6B/NFATC2/PLXNB2/BOC/PIK3CB/EPHB3/ROBO2/EPHA3/PPP3CA/CAMK2D/BMPR1B/EFNA5/CAMK2A/SLIT3/PIK3R1/FYN/LRRC4/PLXNA4/RAC1/SEMA3C/PPP3CC/DPYSL2/RGS3/ABL1/NTNG2/PTCH1/PAK3
hsa05205	Proteoglycans in cancer	48/855	205/8521	1.27E-08	2.05E-06	1.36E-06	TGFB2/HSPG2/WNT4/SLC9A1/ITGB1/CAMK2G/FAS/PLCE1/ARHGEF12/IGF2/CCND1/WNT11/FRS2/SOS2/IQGAP1/IGF1R/MAPK3/MMP2/TP53/PIK3R2/ITGAV/FZD7/SDC4/TIAM1/TIMP3/WNT7B/ITGB5/PIK3CB/CTNNB1/ITPR1/FLNB/ANK2/CAMK2D/FGF2/CAMK2A/PIK3R1/ITPR3/CDKN1A/VEGFA/FLNC/EGFR/RAC1/FZD9/FGFR1/ANK1/SDC2/PTCH1/FLNA
hsa04933	AGE-RAGE signaling pathway in diabetic complications	29/855	100/8521	8.06E-08	8.68E-06	5.74E-06	VCAM1/TGFB2/AGT/JUN/PLCE1/CCND1/COL4A2/SMAD3/MAPK3/MMP2/CCL2/STAT5B/STAT5A/NFATC1/PIK3R2/PLCD4/PRKCE/PLCB4/PIK3CB/TGFBR2/PLCD1/MAPK10/EGR1/DIAPH1/PIK3R1/VEGFA/SERPINE1/RAC1/JAK2
hsa05212	Pancreatic cancer	24/855	76/8521	1.83E-07	1.32E-05	8.70E-06	TGFB2/JAK1/GADD45A/DDB2/CCND1/SMAD3/MAPK3/TP53/RALBP1/PIK3R2/GADD45B/TGFA/PIK3CB/PLD1/TGFBR2/MAPK10/PIK3R1/CDKN1A/VEGFA/RALA/EGFR/RAC1/CDK6/IKBKB
hsa04510	Focal adhesion	45/855	203/8521	2.04E-07	1.32E-05	8.70E-06	LAMB3/CAPN2/COL9A2/JUN/ITGB1/CCND1/EMP1/COL4A2/SOS2/PAK6/IGF1R/MAPK3/BCAR1/LAMA1/PIK3R2/PIP5K1C/ACTN4/ITGB6/ITGA6/ITGAV/COL9A3/COL6A1/PDGFB/MYLK/ITGB5/PIK3CB/CTNNB1/FLNB/PDGFC/MAPK10/DIAPH1/PDGFRB/PIK3R1/FYN/LAMA2/VEGFA/MYL10/LAMB1/FLNC/ITGB8/EGFR/RAC1/RAPGEF1/PAK3/FLNA
hsa04928	Parathyroid hormone synthesis, secretion and action	29/855	106/8521	3.21E-07	1.73E-05	1.14E-05	MEF2D/RXRG/PDE4B/LRP5/MMP14/FOS/AKAP13/MAPK3/ADCY9/ADCY7/NR4A2/CYP24A1/PLCB4/ADCY5/PLD1/PTH1R/ITPR1/EGR1/PDE4D/MEF2C/ITPR3/CDKN1A/RUNX2/CREB3L2/GNA12/CREB5/EGFR/FGFR1/RXRA
hsa05210	Colorectal cancer	25/855	86/8521	6.01E-07	2.77E-05	1.83E-05	TGFB2/JUN/GADD45A/TCF7L2/DDB2/CCND1/SOS2/FOS/SMAD3/MAPK3/AXIN1/TP53/PIK3R2/GADD45B/TGFA/TCF7L1/PIK3CB/TGFBR2/CTNNB1/MAPK10/PIK3R1/CDKN1A/RALA/EGFR/RAC1
hsa05167	Kaposi sarcoma-associated herpesvirus infection	42/855	194/8521	1.02E-06	3.84E-05	2.54E-05	IKBKE/BECN2/JUN/JAK1/TCF7L2/FAS/CCND1/MAP1LC3B2/UBC/TBK1/GNG2/FOS/CALM1/GNB5/MAPK3/CREBBP/TP53/PIK3R6/NFATC1/PIK3R2/ZFP36/TCF7L1/PREX1/NFATC2/RCAN1/PDGFB/PIK3CB/GNB4/CTNNB1/ITPR1/PPP3CA/FGF2/MAPK10/PIK3R1/ITPR3/CDKN1A/VEGFA/RAC1/CDK6/PPP3CC/IKBKB/JAK2
hsa05225	Hepatocellular carcinoma	38/855	168/8521	1.07E-06	3.84E-05	2.54E-05	TGFB2/WNT4/GADD45A/GSTO2/TCF7L2/IGF2/DDB2/LRP5/CCND1/WNT11/TXNRD1/MGST1/SOS2/DPF3/SMAD3/IGF1R/MAPK3/AXIN1/TP53/PIK3R2/GADD45B/NFE2L2/FZD7/TGFA/TCF7L1/HMOX1/WNT7B/PIK3CB/TGFBR2/CTNNB1/CSNK1A1/PIK3R1/ARID1B/CDKN1A/EGFR/FZD9/CDK6/SMARCA2
hsa04310	Wnt signaling pathway	38/855	171/8521	1.70E-06	5.49E-05	3.63E-05	WNT4/JUN/TCF7L2/CTBP2/CAMK2G/LRP5/CCND1/WNT11/DAAM1/SMAD3/TLE3/AXIN1/CREBBP/SIAH1/NKD1/TP53/NFATC1/FZD7/TCF7L1/NFATC2/PLCB4/WNT7B/TBL1XR1/CTNNB1/PRICKLE2/PPP3CA/CAMK2D/MAPK10/CSNK1A1/CAMK2A/DAAM2/RAC1/FZD9/PPP3CC/INVS/TLE1/ROR2/TBL1X
hsa04919	Thyroid hormone signaling pathway	30/855	121/8521	1.98E-06	5.83E-05	3.86E-05	ATP1A1/RXRG/ATP1B1/WNT4/SLC9A1/PFKP/PLCE1/CCND1/MED13L/TBC1D4/ATP2A1/MAPK3/CREBBP/THRA/TP53/PIK3R2/ITGAV/PLCD4/NCOA1/NCOA3/PLCB4/RCAN1/PIK3CB/THRB/PLCD1/CTNNB1/PIK3R1/NCOA2/RXRA/NOTCH1
hsa05214	Glioma	22/855	75/8521	2.40E-06	6.46E-05	4.27E-05	GADD45A/CAMK1D/CAMK2G/DDB2/CCND1/SOS2/CALM1/IGF1R/MAPK3/TP53/PIK3R2/GADD45B/TGFA/PDGFB/PIK3CB/CAMK2D/PDGFRB/CAMK2A/PIK3R1/CDKN1A/EGFR/CDK6
hsa05220	Chronic myeloid leukemia	22/855	76/8521	3.06E-06	7.61E-05	5.03E-05	TGFB2/GADD45A/CTBP2/DDB2/CCND1/SOS2/SMAD3/MAPK3/STAT5B/STAT5A/TP53/PIK3R2/GADD45B/RUNX1/BCR/PIK3CB/TGFBR2/PIK3R1/CDKN1A/CDK6/IKBKB/ABL1
hsa04390	Hippo signaling pathway	35/855	157/8521	4.03E-06	9.30E-05	6.15E-05	CRB1/TGFB2/WNT4/TCF7L2/CTNNA3/YAP1/PPP2R1B/TEAD1/CCND1/WNT11/TEAD4/LATS2/FRMD6/SMAD3/AXIN1/NKD1/SMAD7/GLI2/FZD7/BMPR2/TCF7L1/PARD6B/WNT7B/WWTR1/TGFBR2/CTNNB1/LIMD1/BMPR1B/PPP2CA/CTNNA1/CCN2/BMP6/SERPINE1/FZD9/YWHAZ
hsa05224	Breast cancer	33/855	147/8521	6.47E-06	0.000139261	9.21E-05	WNT4/JUN/GADD45A/TCF7L2/DDB2/LRP5/CCND1/WNT11/SOS2/FOS/IGF1R/MAPK3/AXIN1/TP53/PIK3R2/GADD45B/FZD7/NCOA1/TCF7L1/NCOA3/WNT7B/PIK3CB/HES1/CTNNB1/FGF2/CSNK1A1/PIK3R1/CDKN1A/EGFR/FZD9/CDK6/FGFR1/NOTCH1
hsa05222	Small cell lung cancer	24/855	92/8521	8.18E-06	0.000156651	0.000103634	ZBTB17/RXRG/LAMB3/GADD45A/ITGB1/DDB2/CCND1/COL4A2/TP53/LAMA1/PIK3R2/GADD45B/ITGA6/ITGAV/PIK3CB/RARB/PIK3R1/LAMA2/CDKN1A/LAMB1/CDK6/IKBKB/TRAF1/RXRA
hsa05213	Endometrial cancer	18/855	58/8521	8.24E-06	0.000156651	0.000103634	GADD45A/TCF7L2/CTNNA3/DDB2/CCND1/SOS2/MAPK3/AXIN1/TP53/PIK3R2/GADD45B/TCF7L1/PIK3CB/CTNNB1/CTNNA1/PIK3R1/CDKN1A/EGFR
hsa05226	Gastric cancer	33/855	149/8521	8.78E-06	0.000157546	0.000104226	RXRG/TGFB2/WNT4/GADD45A/TCF7L2/CTNNA3/DDB2/LRP5/CCND1/WNT11/SOS2/SMAD3/MAPK3/AXIN1/JUP/TP53/PIK3R2/GADD45B/FZD7/TCF7L1/WNT7B/PIK3CB/RARB/TGFBR2/CTNNB1/FGF2/CTNNA1/CSNK1A1/PIK3R1/CDKN1A/EGFR/FZD9/RXRA
hsa05163	Human cytomegalovirus infection	44/855	225/8521	9.70E-06	0.000164839	0.000109051	IL6R/JAK1/FAS/ARHGEF12/CCND1/TBK1/SOS2/GNG2/CALM1/GNB5/AKAP13/MAPK3/ADCY9/ADCY7/GNAO1/CX3CL1/BCAR1/CCL2/TP53/NFATC1/PIK3R2/IL1R1/ITGAV/NFATC2/PLCB4/ADCY5/PIK3CB/GNB4/CTNNB1/ITPR1/PPP3CA/STING1/PIK3R1/ITPR3/CDKN1A/VEGFA/CREB3L2/GNA12/CREB5/EGFR/RAC1/CDK6/PPP3CC/IKBKB
hsa05412	Arrhythmogenic right ventricular cardiomyopathy	21/855	77/8521	1.43E-05	0.000230244	0.00015232	LMNA/TCF7L2/CACNB2/ITGB1/CTNNA3/ATP2A1/JUP/LAMA1/CACNB4/ITGB6/ITGA6/ITGAV/TCF7L1/CACNG2/ITGB5/CTNNB1/CTNNA1/SGCD/LAMA2/ITGB8/DMD
hsa05223	Non-small cell lung cancer	20/855	72/8521	1.69E-05	0.000259945	0.000171969	RXRG/GADD45A/DDB2/CCND1/SOS2/MAPK3/STAT5B/STAT5A/TP53/PIK3R2/GADD45B/ALK/TGFA/PIK3CB/RARB/PIK3R1/CDKN1A/EGFR/CDK6/RXRA
hsa04015	Rap1 signaling pathway	41/855	210/8521	2.02E-05	0.000297101	0.00019655	EFNA3/EFNA1/RAP1GAP/ENAH/SIPA1L2/LPAR3/ITGB1/PLCE1/PRKD1/SIPA1L1/CALM1/IGF1R/MAPK3/ADCY9/ADCY7/GNAO1/BCAR1/MAP2K3/PIK3R2/RASGRP3/PARD6B/PLCB4/TIAM1/PDGFB/ADCY5/PIK3CB/CTNNB1/FGF2/PDGFC/RAPGEF2/EFNA5/PDGFRB/LCP2/PIK3R1/VEGFA/RALA/EGFR/RAC1/FGFR1/RAPGEF1/LPAR4
hsa04925	Aldosterone synthesis and secretion	24/855	98/8521	2.59E-05	0.000363274	0.000240328	ATP1A1/ATP1B1/ATP2B4/AGT/CAMK1D/CAMK2G/SCARB1/NR4A1/PRKD1/CALM1/ADCY9/ADCY7/LDLR/NR4A2/PRKCE/PLCB4/ADCY5/ITPR1/CAMK2D/CAMK2A/ITPR3/CREB3L2/CREB5/DAGLB
hsa05165	Human papillomavirus infection	57/855	331/8521	2.80E-05	0.000376424	0.000249028	IKBKE/LAMB3/WNT4/COL9A2/JAK1/TCF7L2/ITGB1/FAS/PPP2R1B/CCND1/WNT11/MAML2/TBK1/COL4A2/SOS2/PPP2R5E/PSMC1/PKM/MAPK3/AXIN1/CREBBP/TP53/LAMA1/PIK3R2/ITGB6/ITGA6/ITGAV/FZD7/TCF7L1/PARD6B/COL9A3/COL6A1/WNT7B/ITGB5/PIK3CB/HES1/CTNNB1/RBPJ/PPP2CA/CSNK1A1/PDGFRB/PIK3R1/LAMA2/TBPL1/CDKN1A/VEGFA/LAMB1/CREB3L2/ATP6V0A4/ITGB8/CREB5/EGFR/FZD9/CDK6/IKBKB/NOTCH1/NFX1
hsa05211	Renal cell carcinoma	19/855	69/8521	3.13E-05	0.00040426	0.000267443	TGFB2/EGLN1/JUN/ETS1/SOS2/PAK6/ARNT2/MAPK3/CREBBP/PIK3R2/TGFA/PDGFB/PIK3CB/PIK3R1/CDKN1A/VEGFA/RAC1/RAPGEF1/PAK3
hsa05216	Thyroid cancer	13/855	37/8521	3.43E-05	0.00042673	0.000282308	RXRG/GADD45A/TCF7L2/DDB2/CCND1/MAPK3/TP53/GADD45B/PAX8/TCF7L1/CTNNB1/CDKN1A/RXRA
hsa04371	Apelin signaling pathway	30/855	139/8521	3.76E-05	0.000434105	0.000287187	MEF2D/BECN2/SLC9A1/ACTA2/CCND1/MAP1LC3B2/GNG2/CALM1/RYR3/GNB5/SMAD3/MAPK3/ADCY9/ADCY7/PIK3R6/KLF2/HDAC4/PRKCE/PLCB4/ADCY5/MYLK/GNB4/ITPR1/PPARGC1A/EGR1/MEF2C/CCN2/ITPR3/SERPINE1/PRKAG2
hsa05418	Fluid shear stress and atherosclerosis	30/855	139/8521	3.76E-05	0.000434105	0.000287187	VCAM1/ARHGEF2/JUN/GSTO2/MGST1/FOS/CALM1/MMP2/CCL2/TP53/KLF2/PIK3R2/IL1R1/ACVR1/NFE2L2/ITGAV/BMPR2/SDC4/HMOX1/PDGFB/PIK3CB/CTNNB1/MAPK10/BMPR1B/PIK3R1/MEF2C/VEGFA/RAC1/IKBKB/SDC2
hsa04921	Oxytocin signaling pathway	32/855	154/8521	4.63E-05	0.000516162	0.000341473	JUN/CAMK1D/CACNB2/CAMK2G/CCND1/FOS/CALM1/RYR3/MAPK3/ADCY9/ADCY7/GNAO1/KCNJ12/PIK3R6/NFATC1/CACNB4/NFATC2/PLCB4/RCAN1/CACNG2/ADCY5/MYLK/ITPR1/PPP3CA/CAMK2D/CAMK2A/MEF2C/ITPR3/CDKN1A/PRKAG2/EGFR/PPP3CC
hsa04151	PI3K-Akt signaling pathway	59/855	354/8521	5.41E-05	0.000582794	0.000385554	THEM4/IL6R/EFNA3/EFNA1/LAMB3/COL9A2/JAK1/LPAR3/ITGB1/PPP2R1B/IGF2/CCND1/NR4A1/COL4A2/SOS2/GNG2/PPP2R5E/GNB5/IGF1R/MAPK3/TP53/PIK3R6/LAMA1/STK11/PIK3R2/ITGB6/ITGA6/ITGAV/TGFA/COL9A3/COL6A1/PDGFB/ITGB5/PIK3CB/GNB4/FGF2/PDGFC/EFNA5/PPP2CA/PDGFRB/PRLR/PIK3R1/LAMA2/CDKN1A/VEGFA/LAMB1/CREB3L2/ITGB8/CREB5/EGFR/RAC1/CDK6/YWHAZ/FGFR1/IKBKB/RXRA/JAK2/NTRK2/LPAR4
hsa04010	MAPK signaling pathway	52/855	301/8521	5.75E-05	0.00059946	0.000396579	EFNA3/EFNA1/TGFB2/JUN/GADD45A/CACNB2/MAP3K8/FAS/IGF2/NR4A1/SOS2/FOS/IGF1R/MAPK3/MAP2K3/TP53/NFATC1/MKNK2/GADD45B/MAP4K4/IL1R1/CACNB4/RASGRP3/TGFA/DUSP2/CACNG2/PDGFB/TAB1/TGFBR2/MAPKAPK3/DUSP7/FLNB/PPP3CA/FGF2/PDGFC/RAPGEF2/MAPK10/EFNA5/PDGFRB/MEF2C/VEGFA/FLNC/GNA12/EGFR/RAC1/HSPB1/PPP3CC/FGFR1/IKBKB/NTRK2/FLNA/RPS6KA3
hsa05215	Prostate cancer	23/855	97/8521	6.54E-05	0.000645169	0.000426819	TCF7L2/CCND1/SOS2/IGF1R/MAPK3/CREBBP/TP53/PIK3R2/TGFA/TCF7L1/PDGFB/PIK3CB/ETV5/CTNNB1/PDGFC/PDGFRB/PIK3R1/CDKN1A/CREB3L2/CREB5/EGFR/FGFR1/IKBKB
hsa04550	Signaling pathways regulating pluripotency of stem cells	30/855	143/8521	6.59E-05	0.000645169	0.000426819	WNT4/JAK1/NODAL/PCGF5/WNT11/ACVR1B/SMAD9/ESRRB/SMAD3/IGF1R/MAPK3/AXIN1/ZFHX3/PIK3R2/INHBB/ACVR1/FZD7/BMPR2/LIF/WNT7B/PIK3CB/CTNNB1/FGF2/BMPR1B/PIK3R1/JARID2/FZD9/FGFR1/KLF4/JAK2
hsa05231	Choline metabolism in cancer	23/855	98/8521	7.75E-05	0.000736196	0.000487038	PLPP3/JUN/SLC44A3/CHKA/SOS2/FOS/MAPK3/SLC44A2/PIK3R2/PIP5K1C/DGKD/GPCPD1/PDGFB/PIK3CB/PLD1/DGKG/PDGFC/MAPK10/PDGFRB/PIK3R1/DGKB/EGFR/RAC1
hsa00532	Glycosaminoglycan biosynthesis - chondroitin sulfate / dermatan sulfate	9/855	21/8521	9.53E-05	0.000879897	0.000582105	CHST15/CSGALNACT2/CHST3/CHST11/XYLT1/CHPF/UST/CHPF2/CSGALNACT1
hsa05217	Basal cell carcinoma	17/855	63/8521	0.000106813	0.000958354	0.000634009	WNT4/GADD45A/TCF7L2/DDB2/WNT11/AXIN1/TP53/GADD45B/GLI2/FZD7/TCF7L1/WNT7B/CTNNB1/CDKN1A/GLI3/FZD9/PTCH1
hsa04934	Cushing syndrome	31/855	155/8521	0.000128338	0.001090901	0.000721697	PBX1/WNT4/AGT/TCF7L2/CAMK2G/CCND1/WNT11/SCARB1/NR4A1/MAPK3/AXIN1/ADCY9/ADCY7/LDLR/FZD7/TCF7L1/PLCB4/WNT7B/ADCY5/CTNNB1/ITPR1/CAMK2D/CAMK2A/ITPR3/CDKN1A/CREB3L2/CREB5/EGFR/FZD9/CDK6/NR5A1
hsa05161	Hepatitis B	32/855	162/8521	0.000128341	0.001090901	0.000721697	IKBKE/TGFB2/HSPG2/JUN/JAK1/EGR2/FAS/DDB2/TBK1/SOS2/FOS/SMAD3/MAPK3/CREBBP/MAP2K3/STAT5B/STAT5A/TP53/NFATC1/PIK3R2/NFATC2/TAB1/PIK3CB/TGFBR2/MAPK10/PIK3R1/CDKN1A/CREB3L2/CREB5/YWHAZ/IKBKB/JAK2
hsa05414	Dilated cardiomyopathy	22/855	96/8521	0.000160119	0.001319523	0.000872945	LMNA/TGFB2/AGT/CACNB2/ITGB1/TPM1/ATP2A1/ADCY9/ADCY7/LAMA1/TPM4/CACNB4/ITGB6/ITGA6/ITGAV/CACNG2/ADCY5/ITGB5/SGCD/LAMA2/ITGB8/DMD
hsa05166	Human T-cell leukemia virus 1 infection	40/855	222/8521	0.000163408	0.001319523	0.000872945	TGFB2/JUN/JAK1/NRP1/EGR2/ANAPC16/ETS1/CCND1/FOS/SMAD3/MAPK3/CREBBP/ADCY9/ADCY7/VAC14/STAT5B/STAT5A/TP53/NFATC1/PIK3R2/CRTC1/ZFP36/IL1R1/NFATC2/ADCY5/PIK3CB/TGFBR2/PPP3CA/MAD2L1/ANAPC10/MAPK10/EGR1/PIK3R1/TBPL1/CDKN1A/CREB3L2/MAD1L1/CREB5/PPP3CC/IKBKB
hsa05218	Melanoma	18/855	72/8521	0.000196102	0.001544899	0.001022045	GADD45A/DDB2/CCND1/IGF1R/MAPK3/TP53/PIK3R2/GADD45B/PDGFB/PIK3CB/FGF2/PDGFC/PDGFRB/PIK3R1/CDKN1A/EGFR/CDK6/FGFR1
hsa04912	GnRH signaling pathway	21/855	93/8521	0.000278624	0.002133494	0.001411437	JUN/CAMK2G/MMP14/SOS2/CALM1/MAPK3/ADCY9/ADCY7/MMP2/MAP2K3/GNRH2/PLCB4/ADCY5/PLD1/ITPR1/CAMK2D/MAPK10/EGR1/CAMK2A/ITPR3/EGFR
hsa04725	Cholinergic synapse	24/855	113/8521	0.000284026	0.002133494	0.001411437	CAMK2G/GNG2/FOS/GNB5/MAPK3/ADCY9/ADCY7/GNAO1/KCNJ12/PIK3R6/PIK3R2/PLCB4/ADCY5/PIK3CB/GNB4/ITPR1/CAMK2D/CAMK2A/PIK3R1/FYN/ITPR3/CREB3L2/CREB5/JAK2
hsa05410	Hypertrophic cardiomyopathy	20/855	90/8521	0.000482293	0.003540471	0.002342237	LMNA/TGFB2/AGT/CACNB2/ITGB1/TPM1/ATP2A1/LAMA1/TPM4/CACNB4/ITGB6/ITGA6/ITGAV/CACNG2/ITGB5/SGCD/LAMA2/PRKAG2/ITGB8/DMD
hsa04012	ErbB signaling pathway	19/855	85/8521	0.000612825	0.004398721	0.002910022	JUN/CAMK2G/SOS2/PAK6/MAPK3/STAT5B/STAT5A/PIK3R2/NCK2/TGFA/PIK3CB/CAMK2D/MAPK10/CAMK2A/PIK3R1/CDKN1A/EGFR/ABL1/PAK3
hsa01521	EGFR tyrosine kinase inhibitor resistance	18/855	79/8521	0.000664108	0.004663193	0.003084987	IL6R/JAK1/GAS6/SOS2/IGF1R/MAPK3/PIK3R2/AXL/TGFA/PDGFB/PIK3CB/FGF2/PDGFC/PDGFRB/PIK3R1/VEGFA/EGFR/JAK2
hsa04072	Phospholipase D signaling pathway	28/855	148/8521	0.000687415	0.004724153	0.003125316	DNM3/AGT/PLPP3/LPAR3/SOS2/MAPK3/ADCY9/ADCY7/PIK3R6/PIK3R2/PIP5K1C/DGKD/PLCB4/PDGFB/ADCY5/PIK3CB/PLD1/DGKG/PDGFC/PDGFRB/PIK3R1/FYN/AGPAT4/DGKB/GNA12/RALA/EGFR/LPAR4
hsa04520	Adherens junction	20/855	93/8521	0.000753145	0.005068037	0.003352816	SSX2IP/TCF7L2/CTNNA3/PTPRJ/SMAD3/IQGAP1/IGF1R/MAPK3/CREBBP/PTPRM/ACTN4/TCF7L1/TGFBR2/CTNNB1/CTNNA1/FYN/MYL10/EGFR/RAC1/FGFR1
hsa04660	T cell receptor signaling pathway	24/855	121/8521	0.000812174	0.00535372	0.003541813	JUN/MAP3K8/PPP2R1B/SOS2/PPP2R5E/FOS/PAK6/MAPK3/NFATC1/PIK3R2/NCK2/CD8B2/ICOS/NFATC2/PIK3CB/PPP3CA/MAPK10/PPP2CA/LCP2/PIK3R1/FYN/PPP3CC/IKBKB/PAK3
hsa04659	Th17 cell differentiation	22/855	108/8521	0.000911652	0.005889275	0.003896115	IL6R/RXRG/JUN/JAK1/FOS/RORA/SMAD3/MAPK3/RARA/STAT5B/STAT5A/NFATC1/IL1R1/NFATC2/RUNX1/TGFBR2/PPP3CA/MAPK10/PPP3CC/IKBKB/RXRA/JAK2
hsa05132	Salmonella infection	41/855	249/8521	0.000937366	0.005936649	0.003927456	S100A10/PLEKHM2/RAB7B/JUN/TCF7L2/VPS11/AHNAK/DYNC1H1/AHNAK2/RHOJ/FOS/ANXA2/SNX33/MAPK3/DYNC1LI2/TUBB3/MAP2K3/TUBB4A/RHOB/ARPC2/TUBA4A/TCF7L1/DYNLRB1/ELMO2/TAB1/RAB7A/PIK3CB/CTNNB1/FLNB/MAPK10/SNX9/MYL10/FLNC/NOD1/ELMO1/RALA/RAC1/DYNC1I1/IKBKB/PAK3/FLNA
hsa04915	Estrogen signaling pathway	26/855	137/8521	0.001003467	0.006233072	0.004123558	JUN/SOS2/FOS/CALM1/MAPK3/ADCY9/ADCY7/MMP2/GNAO1/RARA/PIK3R2/NCOA1/TGFA/NCOA3/PLCB4/ADCY5/PIK3CB/ITPR1/PIK3R1/ITPR3/FKBP5/GPER1/CREB3L2/CREB5/EGFR/NCOA2
hsa04512	ECM-receptor interaction	19/855	89/8521	0.001110239	0.006766174	0.004476237	LAMB3/HSPG2/COL9A2/ITGB1/COL4A2/LAMA1/ITGB6/ITGA6/ITGAV/SDC4/COL9A3/COL6A1/ITGB5/DMP1/MEPE/LAMA2/LAMB1/ITGB8/CD36
hsa04014	Ras signaling pathway	39/855	236/8521	0.001153323	0.006898578	0.00456383	EFNA3/EFNA1/PLCE1/ETS1/IGF2/TBK1/RASA3/SOS2/GNG2/CALM1/PAK6/GNB5/IGF1R/MAPK3/KSR1/RALBP1/PIK3R2/RASGRP3/TGFA/TIAM1/PDGFB/PIK3CB/PLD1/GNB4/FGF2/PDGFC/MAPK10/EFNA5/PDGFRB/PIK3R1/VEGFA/RALA/EGFR/RAC1/FGFR1/IKBKB/ABL1/NTRK2/PAK3
hsa04810	Regulation of actin cytoskeleton	38/855	229/8521	0.001227233	0.007207206	0.004768006	ENAH/SLC9A1/ITGB1/ARHGEF12/SSH1/SPATA13/SOS2/PAK6/IQGAP1/MAPK3/BCAR1/PIK3R2/PIP5K1C/ACTN4/ARHGEF4/ITGB6/ITGA6/ITGAV/ARPC2/TIAM1/MYH9/PDGFB/MYLK/ITGB5/PIK3CB/FGF2/PDGFC/DIAPH1/PDGFRB/PIK3R1/MYL10/ITGB8/GNA12/EGFR/RAC1/FGFR1/PAK3/LPAR4
hsa05417	Lipid and atherosclerosis	36/855	215/8521	0.001385821	0.007993217	0.005288001	VCAM1/RXRG/IKBKE/JUN/CAMK2G/FAS/TBK1/FOS/CALM1/MAPK3/MAP2K3/CCL2/ERN1/TP53/NFATC1/LDLR/PIK3R2/TANK/NFE2L2/NFATC2/PLCB4/ABCG1/TAB1/PIK3CB/ITPR1/PPP3CA/CAMK2D/MAPK10/CAMK2A/PIK3R1/RAC1/CD36/PPP3CC/IKBKB/RXRA/JAK2
hsa04530	Tight junction	30/855	170/8521	0.001462618	0.008189766	0.00541803	ARHGEF2/JUN/ITGB1/PPP2R1B/JAM3/CCND1/AMOTL1/YBX3/NEDD4/NEDD4L/STK11/ACTN4/ARPC2/TUBA4A/PRKCE/PARD6B/CLDN8/TIAM1/RUNX1/IGSF5/MYH9/CLDN1/RAPGEF2/MAPK10/PPP2CA/SYNPO/PRKAG2/RAC1/EPB41L4B/CLDN2
hsa01522	Endocrine resistance	20/855	98/8521	0.001495963	0.008189766	0.00541803	JUN/CCND1/SOS2/FOS/IGF1R/MAPK3/ADCY9/ADCY7/MMP2/TP53/PIK3R2/NCOA3/ADCY5/PIK3CB/MAPK10/PIK3R1/CDKN1A/GPER1/EGFR/NOTCH1
hsa04750	Inflammatory mediator regulation of TRP channels	20/855	98/8521	0.001495963	0.008189766	0.00541803	CAMK2G/PRKCH/CALM1/ADCY9/ADCY7/TRPV2/MAP2K3/PIK3R2/IL1R1/PRKCE/PLCB4/HRH1/ADCY5/PIK3CB/ITPR1/CAMK2D/MAPK10/CAMK2A/PIK3R1/ITPR3
hsa04668	TNF signaling pathway	22/855	114/8521	0.001908432	0.010273725	0.006796696	VCAM1/JUN/MAP3K8/FAS/MMP14/FOS/MAPK3/CX3CL1/MAP2K3/CCL2/JUNB/PIK3R2/BCL3/LIF/TAB1/PIK3CB/MAPK10/PIK3R1/CREB3L2/CREB5/IKBKB/TRAF1
hsa04926	Relaxin signaling pathway	24/855	129/8521	0.002043031	0.010818015	0.007156777	JUN/ACTA2/COL4A2/SOS2/GNG2/FOS/GNB5/MAPK3/ADCY9/ADCY7/MMP2/GNAO1/PIK3R2/PLCB4/ADCY5/PIK3CB/GNB4/TGFBR2/MAPK10/PIK3R1/VEGFA/CREB3L2/CREB5/EGFR
hsa04916	Melanogenesis	20/855	101/8521	0.00218904	0.011094116	0.007339435	WNT4/TCF7L2/CAMK2G/WNT11/CALM1/MAPK3/CREBBP/ADCY9/ADCY7/GNAO1/FZD7/TCF7L1/PLCB4/WNT7B/ADCY5/CTNNB1/CAMK2D/CAMK2A/CREB3L2/FZD9
hsa05221	Acute myeloid leukemia	15/855	67/8521	0.002192302	0.011094116	0.007339435	TCF7L2/ZBTB16/CCND1/SOS2/MAPK3/RARA/JUP/STAT5B/STAT5A/PIK3R2/TCF7L1/RUNX1/PIK3CB/PIK3R1/IKBKB
hsa05135	Yersinia infection	25/855	137/8521	0.002198215	0.011094116	0.007339435	JUN/ITGB1/ARHGEF12/TBK1/FOS/MAPK3/BCAR1/MAP2K3/CCL2/NFATC1/PIK3R2/PIP5K1C/CD8B2/ARPC2/ELMO2/NFATC2/TAB1/PIK3CB/MAPK10/LCP2/PIK3R1/ELMO1/RAC1/IKBKB/RPS6KA3
hsa04066	HIF-1 signaling pathway	21/855	109/8521	0.002445441	0.01215196	0.008039263	IL6R/EGLN1/ENO1/PFKP/CAMK2G/IGF1R/MAPK3/CREBBP/PIK3R2/MKNK2/HK2/HMOX1/PIK3CB/CAMK2D/CAMK2A/PIK3R1/CDKN1A/VEGFA/SERPINE1/EGFR/TIMP1
hsa05131	Shigellosis	39/855	247/8521	0.002706776	0.013246797	0.008763565	ARHGEF2/CAPN2/BECN2/JUN/ITGB1/PLCE1/MAP1LC3B2/UBC/TBK1/MAPK3/BCAR1/TP53/SEPTIN9/PIK3R2/ACTN4/IL1R1/ARPC2/PLCD4/PRKCE/HK2/ELMO2/PLCB4/TAB1/PIK3CB/PLCD1/ITPR1/SEPTIN11/MAPK10/STING1/DIAPH1/PIK3R1/ITPR3/MYL10/NOD1/ELMO1/UBE2D4/EGFR/RAC1/IKBKB
hsa04625	C-type lectin receptor signaling pathway	20/855	104/8521	0.00313543	0.015076407	0.009973963	IKBKE/JUN/EGR2/ARHGEF12/LSP1/CALM1/MAPK3/KSR1/NFATC1/PIK3R2/BCL3/NFATC2/PIK3CB/ITPR1/PPP3CA/MAPK10/PIK3R1/ITPR3/PPP3CC/IKBKB
hsa04070	Phosphatidylinositol signaling system	19/855	97/8521	0.00317398	0.015076407	0.009973963	INPP5B/PLCE1/CALM1/PIK3R2/PIP5K1C/PLCD4/DGKD/INPP4A/PLCB4/PIK3CB/DGKG/PLCD1/ITPR1/PIK3R1/SYNJ2/ITPR3/DGKB/MTMR7/IPPK
hsa04722	Neurotrophin signaling pathway	22/855	119/8521	0.00333791	0.015625288	0.010337082	PSEN2/JUN/CAMK2G/ARHGDIB/FRS2/SOS2/CALM1/MAPK3/TP53/PIK3R2/IRAK2/PIK3CB/CAMK2D/MAPK10/CAMK2A/PIK3R1/RAC1/IKBKB/ABL1/RAPGEF1/NTRK2/RPS6KA3
hsa04917	Prolactin signaling pathway	15/855	70/8521	0.003442222	0.015883398	0.010507837	CCND1/SOS2/FOS/MAPK3/STAT5B/STAT5A/TNFRSF11A/SOCS6/PIK3R2/PIK3CB/MAPK10/PRLR/PIK3R1/GCK/JAK2
hsa05100	Bacterial invasion of epithelial cells	16/855	77/8521	0.00354931	0.016146861	0.010682134	DNM3/ITGB1/CTNNA3/BCAR1/SEPTIN9/PIK3R2/ARPC2/ELMO2/PIK3CB/CTNNB1/ARHGAP10/SEPTIN11/CTNNA1/PIK3R1/ELMO1/RAC1
hsa04935	Growth hormone synthesis, secretion and action	22/855	120/8521	0.003711594	0.016650623	0.011015403	SOS2/FOS/MAPK3/CREBBP/ADCY9/ADCY7/BCAR1/MAP2K3/STAT5B/STAT5A/JUNB/PIK3R2/PLCB4/ADCY5/PIK3CB/ITPR1/MAPK10/PIK3R1/ITPR3/CREB3L2/CREB5/JAK2
hsa05160	Hepatitis C	27/855	158/8521	0.00392953	0.017281768	0.011432944	IKBKE/JAK1/FAS/IFIT1B/PPP2R1B/CCND1/SCARB1/TBK1/SOS2/MAPK3/TP53/LDLR/PIK3R2/CLDN8/PIK3CB/CLDN1/CTNNB1/PPP2CA/PIK3R1/CDKN1A/EGFR/CDK6/YWHAZ/EIF3E/IKBKB/RXRA/CLDN2
hsa04380	Osteoclast differentiation	23/855	128/8521	0.00395929	0.017281768	0.011432944	TGFB2/JUN/JAK1/FOS/MAPK3/TNFRSF11A/NFATC1/JUNB/PIK3R2/IL1R1/FOSL2/NFATC2/TAB1/PIK3CB/TGFBR2/PPP3CA/MAPK10/LCP2/PIK3R1/FYN/RAC1/PPP3CC/IKBKB
hsa00564	Glycerophospholipid metabolism	19/855	99/8521	0.004022864	0.017325134	0.011461633	ETNK2/PLPP3/CHKA/PLD4/LPCAT2/LCAT/PGS1/LPIN1/GPD2/DGKD/PLB1/LPIN3/GPCPD1/PLD1/DGKG/GPD1L/LPCAT1/AGPAT4/DGKB
hsa04927	Cortisol synthesis and secretion	14/855	65/8521	0.004416844	0.018771589	0.012418551	PBX1/AGT/SCARB1/NR4A1/ADCY9/ADCY7/LDLR/PLCB4/ADCY5/ITPR1/ITPR3/CREB3L2/CREB5/NR5A1
hsa04261	Adrenergic signaling in cardiomyocytes	26/855	154/8521	0.005426133	0.022653206	0.014986478	ATP1A1/ATP1B1/ATP2B4/AGT/SLC9A1/CACNB2/CAMK2G/PPP2R1B/PPP2R5E/CALM1/TPM1/ATP2A1/MAPK3/ADCY9/ADCY7/PIK3R6/TPM4/CACNB4/PLCB4/CACNG2/ADCY5/CAMK2D/PPP2CA/CAMK2A/CREB3L2/CREB5
hsa05202	Transcriptional misregulation in cancer	31/855	193/8521	0.005470434	0.022653206	0.014986478	ZBTB17/PBX1/RXRG/GADD45A/HHEX/ZBTB16/FLI1/DDB2/ETV6/BCL11B/ARNT2/IGF1R/RARA/JUP/TP53/ASPSCR1/GADD45B/MLLT1/PAX8/RUNX1/ETV5/TGFBR2/AFF1/MEF2C/CDKN1A/RUNX2/ETV1/CDK14/TRAF1/RXRA/NR4A3
hsa05142	Chagas disease	19/855	102/8521	0.005641833	0.023067242	0.015260388	TGFB2/JUN/FAS/PPP2R1B/FOS/MAPK3/GNAO1/CCL2/GNAL/PIK3R2/PLCB4/PIK3CB/TGFBR2/MAPK10/PPP2CA/PIK3R1/SERPINE1/IKBKB/GNA14
hsa04974	Protein digestion and absorption	19/855	103/8521	0.006287367	0.025385244	0.016793888	ATP1A1/ATP1B1/COL16A1/COL8A2/COL9A2/COL4A2/SLC15A1/SLC7A8/COL5A3/SLC1A5/COL9A3/COL6A1/COL12A1/CPA1/COL28A1/ELN/COL27A1/COL5A1/COL15A1
hsa04918	Thyroid hormone synthesis	15/855	75/8521	0.006781429	0.027041994	0.017889929	ATP1A1/TTF2/ATP1B1/ADCY9/ADCY7/PAX8/PLCB4/ADCY5/ITPR1/GPX8/IYD/ITPR3/CREB3L2/CREB5/TG
hsa04020	Calcium signaling pathway	38/855	253/8521	0.00713165	0.028091741	0.018584401	CASQ2/ATP2B4/CAMK1D/CAMK2G/PLCE1/STIM1/TPCN1/CALM1/RYR3/ATP2A1/ADCY9/ADCY7/GNAL/NFATC1/PLCD4/TGFA/NFATC2/NTSR1/PLCB4/PDGFB/HRH1/MYLK/PLCD1/ITPR1/PPP3CA/CAMK2D/FGF2/PDGFC/PDGFRB/CAMK2A/ITPR3/VEGFA/EGFR/PPP3CC/FGFR1/ASPH/GNA14/NTRK2
hsa04713	Circadian entrainment	18/855	97/8521	0.007235754	0.028158417	0.018628511	CAMK2G/GNG2/FOS/CALM1/RYR3/GNB5/MAPK3/ADCY9/ADCY7/GNAO1/PER1/PLCB4/ADCY5/GNB4/ITPR1/CAMK2D/CAMK2A/ITPR3
hsa04330	Notch signaling pathway	13/855	62/8521	0.007564733	0.0290882	0.019243619	SPEN/PSEN2/CTBP2/DTX4/MAML2/NCOR2/TLE3/CREBBP/HES1/RBPJ/ATXN1/NOTCH1/TLE1
hsa04022	cGMP-PKG signaling pathway	27/855	167/8521	0.008384132	0.031859703	0.021077138	ATP1A1/MEF2D/ATP1B1/ATP2B4/KCNMA1/CALM1/ATP2A1/MAPK3/ADCY9/ADCY7/PIK3R6/NFATC1/PRKCE/NFATC2/PLCB4/ADCY5/MYLK/ITPR1/PPP3CA/MEF2C/ITPR3/CREB3L2/GNA12/CREB5/GTF2IRD1/GTF2I/PPP3CC
hsa05230	Central carbon metabolism in cancer	14/855	70/8521	0.008746991	0.032852071	0.02173365	PFKP/PKM/MAPK3/SLC7A5/TP53/PIK3R2/SLC1A5/HK2/PIK3CB/PDGFRB/PIK3R1/GCK/EGFR/FGFR1
hsa04960	Aldosterone-regulated sodium reabsorption	9/855	37/8521	0.009304552	0.034544487	0.022853286	ATP1A1/ATP1B1/SLC9A3R2/MAPK3/NEDD4L/PIK3R2/PIK3CB/NR3C2/PIK3R1
hsa04922	Glucagon signaling pathway	19/855	107/8521	0.009498431	0.03486356	0.023064372	PFKP/CAMK2G/CPT1A/CALM1/PPP4R3A/PKM/CREBBP/PLCB4/ITPR1/PPP3CA/CAMK2D/PPARGC1A/CAMK2A/ITPR3/CREB3L2/PRKAG2/CREB5/GCK/PPP3CC
hsa04024	cAMP signaling pathway	34/855	225/8521	0.009647683	0.035013503	0.023163569	ATP1A1/ATP1B1/ATP2B4/SLC9A1/EDN2/JUN/PDE4B/CAMK2G/PLCE1/FOS/CALM1/ATP2A1/MAPK3/CREBBP/ADCY9/ADCY7/GIP/NFATC1/PIK3R2/FXYD1/TIAM1/ADCY5/PIK3CB/PLD1/CAMK2D/MAPK10/CAMK2A/PDE4D/PIK3R1/CREB3L2/CREB5/GLI3/RAC1/PTCH1
hsa04350	TGF-beta signaling pathway	19/855	108/8521	0.010478319	0.037165516	0.024587257	TGFB2/SKI/NODAL/PPP2R1B/ACVR1B/SMAD9/SMAD6/SMAD3/MAPK3/CREBBP/SMAD7/INHBB/ACVR1/BMPR2/LTBP1/TGFBR2/BMPR1B/PPP2CA/BMP6
hsa04068	FoxO signaling pathway	22/855	131/8521	0.010656026	0.037165516	0.024587257	TGFB2/GADD45A/RAG1/CCND1/GABARAPL1/SOS2/SMAD3/IGF1R/MAPK3/CREBBP/STK11/KLF2/PIK3R2/GADD45B/PIK3CB/TGFBR2/MAPK10/PIK3R1/CDKN1A/PRKAG2/EGFR/IKBKB
hsa04114	Oocyte meiosis	22/855	131/8521	0.010656026	0.037165516	0.024587257	ANAPC16/CAMK2G/PPP2R1B/PPP2R5E/CALM1/IGF1R/MAPK3/ADCY9/ADCY7/ADCY5/ITPR1/PPP3CA/CAMK2D/MAD2L1/ANAPC10/PPP2CA/CAMK2A/ITPR3/MAD1L1/YWHAZ/PPP3CC/RPS6KA3
hsa04911	Insulin secretion	16/855	86/8521	0.010700907	0.037165516	0.024587257	ATP1A1/ATP1B1/CAMK2G/KCNMA1/ADCY9/ADCY7/GIP/SNAP25/PLCB4/ADCY5/CAMK2D/CAMK2A/ITPR3/CREB3L2/CREB5/GCK
hsa04728	Dopaminergic synapse	22/855	132/8521	0.011617933	0.039921194	0.026410306	CAMK2G/PPP2R1B/GNG2/PPP2R5E/FOS/CALM1/GNB5/GNAO1/GNAL/PLCB4/ADCY5/GNB4/ITPR1/PPP3CA/CAMK2D/MAPK10/PPP2CA/CAMK2A/ITPR3/CREB3L2/CREB5/PPP3CC
hsa04930	Type II diabetes mellitus	10/855	46/8521	0.014096436	0.047678526	0.031542254	PKM/MAPK3/PIK3R2/PRKCE/HK2/PIK3CB/MAPK10/PIK3R1/GCK/IKBKB
hsa04514	Cell adhesion molecules	25/855	158/8521	0.014170707	0.047678526	0.031542254	VCAM1/CD2/CADM3/MPZL1/NFASC/ITGB1/JAM3/CD6/CD276/PTPRM/MADCAM1/PTPRS/CD8B2/ITGA6/ITGAV/ICOS/SDC4/CLDN8/CLDN1/LRRC4/ITGB8/SDC2/NTNG2/CLDN2/NLGN3
hsa05235	PD-L1 expression and PD-1 checkpoint pathway in cancer	16/855	89/8521	0.014723839	0.049028866	0.032435587	JUN/JAK1/FOS/MAPK3/MAP2K3/NFATC1/PIK3R2/ALK/NFATC2/PIK3CB/PPP3CA/PIK3R1/EGFR/PPP3CC/IKBKB/JAK2
