# Supplementary material for: Epigenetic insights into GABAergic development in Dravet Syndrome iPSC and therapeutic implications
Source: eLife. 2024 Aug 27;12:RP92599. doi: 10.7554/eLife.92599 (PMC11349296; doi:10.7554/eLife.92599)
Supplement: Supplementary file 5. — Source data for Figure 3 and Figure 3—figure supplement 1. [file elife-92599-supp5.xlsx]

## Sheet: Supplementary File 5
Cluster	Peak Names	Control_d0	Control_d19	Control_d35	Control_d65	Patient_d0	Patient_d19	Patient_d35	Patient_d65	MEM.SHIP	Annotation	Genes
cluster_1	chr1_100949387_100950214	13.5871319690941	4.03012303381446	5.62383184591899	3.09780923170371	17.8946044316273	5.54285799944863	5.99861647898904	7.82059913966802	0.997187341849577	Intron (ENST00000370112.8/148867, intron 8 of 11)	SLC30A7
cluster_1	chr1_101653382_101654200	17.8042980929242	3.83890089402569	1.48707614131483	1.60985046657896	13.8297372904041	2.99343019677935	1.10368197278686	0.792744697265326	0.999809341829708	Intron (ENST00000668955.1/105378872, intron 2 of 3)	LINC01709
cluster_1	chr1_1024636_1025485	13.7741862857535	5.41882875954796	2.60417617670553	4.31249658622849	17.8902901620838	7.04175913173056	4.95174796118325	13.2411273566554	0.973618276490834	Intron (ENST00000379370.7/375790, intron 2 of 35)	AGRN
cluster_1	chr1_10638926_10639685	15.6081371753933	7.19502528891286	2.57335779896929	2.42972891665939	10.9683737557223	6.81948145688441	4.25948807630382	2.61002614780362	0.996275074640916	3' UTR	CASZ1
cluster_1	chr1_10814943_10815962	11.4791582693216	9.71492982319351	2.55085727849838	2.56947527124971	9.72458959665891	7.35844371148894	3.53071676421461	1.16585900029315	0.954413237471498	Distal Intergenic	CASZ1
cluster_1	chr1_10835600_10836390	38.1762631090313	29.8550140639774	13.409968252709	10.0763542109146	46.8064055609078	28.7393616308428	20.4633698211256	8.26712188053901	0.988371509684737	Distal Intergenic	CASZ1
cluster_1	chr1_108947797_108948510	11.4320080303262	3.45451436708127	2.19504484496882	3.57113278398513	8.52113328411829	2.81344882421405	1.78565111161579	4.78496981989875	0.996448645637098	Promoter (<=1kb)	CLCC1
cluster_1	chr1_109240575_109241243	18.4566609532451	3.08090293018087	3.65871187615401	6.29471829221683	18.144450116941	2.28234830074522	1.68710385603248	6.09524856122068	0.998150521111371	Distal Intergenic	SARS1
cluster_1	chr1_109263275_109264156	18.4929597579375	11.0479809073344	12.045642106659	7.69093332615052	26.9267946018077	10.5590918706848	15.3930885152539	10.0861179246028	0.987822381597264	Promoter (1-2kb)	CELSR2
cluster_1	chr1_10960872_10961510	15.5855719100832	8.76233542871062	3.94292835468691	4.62606760222865	15.9721213603363	9.64620177216482	5.74114513464799	4.54073099894402	0.999260167856176	Promoter (2-3kb)	C1orf127
cluster_1	chr1_109643225_109644051	14.399881061077	6.29886813892688	3.81712305432863	4.12779068082304	20.1201510435671	5.79571785926724	5.24658030613744	5.3106051801062	0.999637897376646	Distal Intergenic	GSTM4
cluster_1	chr1_11045264_11046018	16.638190503266	7.79491245214666	2.28655736696458	1.78558947581491	15.2967110920708	4.0277936854601	2.54104021786319	2.22385610326245	0.999745713632822	Promoter (<=1kb)	MASP2
cluster_1	chr1_110477483_110478589	7.4808646500581	1.3183842706882	1.31496280683781	1.80281112051059	6.16080059696357	1.42803578060815	2.78741363118068	2.95369036513503	0.996563600177483	Promoter (2-3kb)	CYMP
cluster_1	chr1_11052668_11053601	17.4538060893394	3.16218353844435	2.21439244487071	2.11582702687018	16.4732409370651	1.89643315792566	1.76862239912278	1.16804830550269	0.999944980683273	Promoter (1-2kb)	SRM
cluster_1	chr1_111515463_111516531	6.28824003788461	1.27779608994894	1.59411618116146	1.68534589168248	11.0800185269429	1.86399469619152	1.73870777304827	1.29968309996689	0.997344417001858	Intron (ENST00000369717.8/57413, intron 1 of 5)	TMIGD3
cluster_1	chr1_112743323_112744641	9.71472035104744	2.73410119467399	1.98711782301786	2.3213307775308	13.7562795054569	1.35906125080481	1.75973410695037	1.96830214200407	0.999416355321064	Distal Intergenic	TAFA3
cluster_1	chr1_112817272_112818577	24.8102862651751	6.50647416408815	1.29608569356173	1.14555093245572	26.990231236955	2.10877214011313	1.05528347131173	1.00344699969464	0.999982005076712	Distal Intergenic	LINC01356
cluster_1	chr1_11286322_11287326	14.5434459176852	12.8486184096417	4.03874569607504	4.68160663072766	18.4335196994225	4.89724034118537	5.13149621488025	2.58720684616568	0.991074960506076	3' UTR	UBIAD1
cluster_1	chr1_112905467_112906469	8.23811594140126	2.19077725938579	0.91401136388943	1.41611724918898	7.93276815130893	1.6115564395423	1.53344433059859	3.84942663068637	0.998752918517226	Distal Intergenic	SLC16A1
cluster_1	chr1_113027123_113028281	16.3950612646972	3.85188045280263	1.2275199817117	1.18220991434073	20.9166437133175	1.26910066262831	1.4046968131289	1.16477868679757	0.999921102716958	Intron (ENST00000627431.2/100506392, intron 4 of 5)	LOC107985189
cluster_1	chr1_113041831_113043102	29.9982727356995	16.5585940512008	8.05463051474564	6.13289963098	30.6489548638551	10.3757888306794	13.0105217956375	11.4658136252156	0.999544338208383	Intron (ENST00000627431.2/100506392, intron 5 of 5)	LRIG2-DT
cluster_1	chr1_113043258_113044206	12.6481698266983	19.4461128346413	5.6999148404566	1.23928567023204	10.3139602383878	3.59200479022339	1.46269974937833	1.76285486786144	0.616449483755645	Intron (ENST00000627431.2/100506392, intron 5 of 5)	LRIG2-DT
cluster_1	chr1_114032863_114033697	11.5148651029875	1.52144309924771	1.38238194990288	4.0470496006385	13.8822353151481	1.86866998137308	2.4245182788019	3.31275628412636	0.998888714091292	Exon (ENST00000632517.2/ENST00000632517.2, exon 1 of 1)	OLFML3
cluster_1	chr1_114037887_114038879	11.2437096384191	3.89040387413377	0.933332191861916	2.36073388601596	11.7828505183715	2.65823866853591	1.06826905658523	1.0470297534599	0.999958788832279	Distal Intergenic	OLFML3
cluster_1	chr1_114075489_114076457	10.8013726839563	5.06999827923322	2.76798018639529	2.15356358595401	11.0594891003828	2.91371852605123	1.57196733042767	1.77006086891476	0.999844156065777	Distal Intergenic	SYT6
cluster_1	chr1_114088257_114089153	14.7064082808792	1.43762419549833	1.68809420406093	1.96942613711308	11.9562128803234	2.50084275274651	1.61619184909582	0.696432398237516	0.999723897492658	Distal Intergenic	SYT6
cluster_1	chr1_115147732_115148624	8.01447518017307	3.39214818095521	3.08128474670327	1.95488064919687	9.16617938352891	4.55919533864984	1.92557995215165	1.44980863128904	0.999425285436038	Distal Intergenic	LINC01765
cluster_1	chr1_115838277_115839829	13.1506309867589	9.70627054059963	8.37207425907522	3.14263550550986	14.4596594864344	6.88964619486815	6.76098523376062	3.04343985188748	0.986241037677879	Promoter (<=1kb)	NHLH2
cluster_1	chr1_1164527_1165382	13.6760202643214	4.97559678911677	2.4873522605074	1.17382720477631	12.0609903661722	1.90049948687984	1.24565817170707	1.42372923586923	0.999752805862132	Promoter (1-2kb)	MIR200B
cluster_1	chr1_11648548_11649253	16.6485074153682	5.6730670254466	1.66198846692758	3.88160619242919	19.6059002573044	5.59705804423895	2.63142094098949	7.19341346420929	0.999591765519958	Promoter (1-2kb)	FBXO2
cluster_1	chr1_11663897_11665147	24.829501135849	10.9276182941211	6.12615027173559	7.78922283730197	22.5136661981884	10.1761481538326	8.44988465236676	10.342186505417	0.999880420508082	Promoter (<=1kb)	FBXO6
cluster_1	chr1_11682331_11683093	25.1089520799308	5.98815362512332	3.8849860096207	3.68822030229426	23.4152256494353	7.15723496093029	4.3608971471195	2.16784336135356	0.99997969493802	Promoter (1-2kb)	MAD2L2
cluster_1	chr1_117268568_117269648	14.4562415800439	8.40012732545532	2.81476213312553	2.94185916754223	24.533978160183	2.59754596275333	2.45893922097832	1.64139293234028	0.997466636513083	Promoter (2-3kb)	LINC01525
cluster_1	chr1_11761961_11763059	9.61179826146961	4.30088414612233	2.84895030493416	1.97968016608634	10.4739190339492	5.37621605902155	2.68475837602967	2.72076616818979	0.999840681224273	Promoter (<=1kb)	C1orf167
cluster_1	chr1_11784767_11785570	19.0651280955851	8.42869219565945	4.89389445450386	4.90744650943947	25.3271495738321	13.149848843502	6.3017534612615	6.91591372506781	0.998866252700763	Promoter (<=1kb)	C1orf167
cluster_1	chr1_11882888_11883695	13.4212616445757	2.25351705665774	1.92241255393549	2.28636800443192	12.9678050016231	3.80057807130093	2.27300041441865	1.55384971528383	0.999967361482585	Distal Intergenic	NPPB
cluster_1	chr1_118984274_118984841	18.4223407295486	9.00947193715527	6.38431629930029	6.31409010606761	15.7623515212312	8.94502248419944	8.06155712562431	2.18931199824736	0.996679138715444	Intron (ENST00000207157.7/6913, intron 1 of 7)	TBX15
cluster_1	chr1_118987473_118988623	18.1270937618328	7.73899853837373	5.36338310069773	3.73826791339675	17.840536283558	7.54522090886186	5.55015549721171	6.29029403800833	0.999980108042564	Promoter (<=1kb)	TBX15
cluster_1	chr1_119327029_119328254	14.8801654200333	6.17286050791398	12.4777780415297	6.3984605484062	14.6067052154777	7.14824030597212	8.13606201896734	5.0809443103335	0.964094309018156	Promoter (<=1kb)	LINC01780
cluster_1	chr1_119340707_119341697	23.0222044326613	1.15406364439512	0.677147703534957	1.53183953188713	18.6273695017828	0.448200296961038	0.573508299057987	0.946601579027641	0.999707223229156	Intron (ENST00000457683.1/105378934, intron 2 of 3)	LINC01780
cluster_1	chr1_11966970_11967594	14.1587667214201	5.47781544503013	2.67530689308508	3.65816243863855	15.624495811929	5.44666605421753	4.55692443793183	4.51014393092453	0.999988946856131	Promoter (2-3kb)	PLOD1
cluster_1	chr1_12078737_12079919	16.4458301396019	3.83359687489433	1.66304807733044	1.35494526436201	19.1046033064918	4.93921804857569	2.71493811815617	5.07742160280261	0.999920217402446	Intron (ENST00000263932.7/943, intron 1 of 14)	TNFRSF8
cluster_1	chr1_12166719_12167645	8.96532990418589	10.01349425246	3.89038982706813	2.16979847421194	13.289190363554	7.96258183790452	5.98123113995829	3.00324092342927	0.942556335732841	Promoter (<=1kb)	MIR7846
cluster_1	chr1_12629063_12630294	13.8703074812053	2.38456196981946	1.09288809995461	1.47436165986949	19.4872586097262	1.69751421358381	1.00486815663116	1.18809924010251	0.999800594067818	Distal Intergenic	DHRS3
cluster_1	chr1_1353487_1354419	27.3505113381671	3.7847545019845	2.24496184390183	4.20644997371588	23.7180614926596	6.17502887992964	4.6622318738145	2.88889428856666	0.999893658522784	Promoter (<=1kb)	MXRA8
cluster_1	chr1_13764505_13765412	5.07817050081056	5.21696977323092	1.38334734863274	1.46866616516731	7.83478890763717	5.31921656416224	2.80527003759398	3.65163041520142	0.944887690644763	Intron (ENST00000311066.10/7799, intron 6 of 9)	PRDM2
cluster_1	chr1_1409886_1410960	16.2241170182054	5.41265851030793	0.806410305377905	3.00563571436773	25.8851994014474	9.91454806859735	7.05686735806781	1.57050871056356	0.996861056442474	Promoter (<=1kb)	MRPL20-DT
cluster_1	chr1_1419774_1420597	15.4036221247057	2.8809274445413	1.49473187702171	2.04788099334996	14.8042073618752	5.18587564257504	1.71967952015545	2.28907656336244	0.999969645921592	Promoter (<=1kb)	ANKRD65-AS1
cluster_1	chr1_1425607_1426241	18.1261604137057	6.47912998100363	5.21279258349661	3.46472489442284	14.4349065219946	6.39842974365895	3.55583985466532	3.85169249692559	0.99960651685146	Promoter (<=1kb)	TMEM88B
cluster_1	chr1_147567608_147568409	14.0654381271488	5.79665451856218	3.31340989539709	3.15001839276541	14.5327573480209	4.5819286593472	3.80594563468276	2.81822746848757	0.999993524035724	Intron (ENST00000683836.1/607, intron 1 of 9)	BCL9
cluster_1	chr1_147833278_147834592	11.9817479990719	5.6084894462247	1.75101145401255	1.74824145894209	9.5703719902808	4.78419575468473	4.50969428717045	1.93116676993103	0.998013400146337	Distal Intergenic	LOC102723321
cluster_1	chr1_147837014_147837716	20.8409854320006	2.74570145578021	1.17215004231149	1.05222010801947	18.673879422011	3.10452809052316	1.20100842073226	0.969671320159028	0.999977774153139	Distal Intergenic	LOC102723321
cluster_1	chr1_148013120_148014146	8.76960161853443	2.11126151720058	1.44120273146356	1.93013550033563	9.03589561630052	3.52714688483046	1.96723031776247	1.31462740525685	0.999960178310923	Promoter (<=1kb)	LINC02804
cluster_1	chr1_148262878_148264272	38.9467273971167	15.9432214799525	8.74878255642414	16.4156338588731	39.543488745148	19.8222073425258	16.3981441242093	13.4260472569944	0.999777888099664	Exon (ENST00000363009.1/ENST00000363009.1, exon 1 of 1)	LOC101927468
cluster_1	chr1_148264712_148265291	28.0015190276084	6.72181984976088	4.07842683623789	4.3590354027006	23.733544196257	8.97606836617601	4.1528468012406	4.01654133612415	0.999920099963957	Distal Intergenic	LOC101927468
cluster_1	chr1_148303110_148304199	9.18112300979566	5.05763367517318	3.80577462075808	3.59769048042139	13.4002839202473	4.52516805480654	4.06050375744705	3.99609014509641	0.999055169588569	Intron (ENST00000648583.1/ENST00000648583.1, intron 1 of 3)	LOC105371225
cluster_1	chr1_148317319_148319033	9.74010741224536	2.59618153408834	1.23267607373618	1.12042462901843	8.31242789947556	5.3596494215514	3.44376971483502	1.62229216595421	0.997635996096143	Exon (ENST00000452108.1/ENST00000452108.1, exon 1 of 1)	MIR5087
cluster_1	chr1_148353313_148354363	11.4500965238774	3.44525750638403	3.00614957166096	2.08702619724515	12.0453006594666	5.48854827039598	2.90458743639709	3.24394661542814	0.999935005058182	Intron (ENST00000638958.1/105371225, intron 1 of 6)	RNVU1-1
cluster_1	chr1_148378519_148379591	11.2236604622616	1.72870387261973	1.38846981693852	1.7167744887807	8.67845182850003	2.70229831296353	0.639277324702027	0.790537803954174	0.999613641642885	Exon (ENST00000622328.1/388685, exon 2 of 4)	MIR6077
cluster_1	chr1_149845371_149845907	17.1185825482206	4.63867633527477	2.39152278398477	3.65530897927855	19.8696692071618	4.68976902250828	2.94227301592408	2.11409514211944	0.999982008034863	Promoter (2-3kb)	H2AC18
cluster_1	chr1_150259745_150260472	33.4557005859149	18.3489480313754	4.43360509765708	6.95374174335891	36.6368585580772	28.3771663673534	17.9867360846492	11.0472463369089	0.983987266341358	Promoter (1-2kb)	CA14
cluster_1	chr1_1504690_1505889	12.8922482722945	6.05383565652201	3.96182982745579	5.123666754998	8.71793590971966	4.86103950506408	3.02281636131788	4.12372055597382	0.993970427451682	Promoter (<=1kb)	ATAD3B
cluster_1	chr1_150604418_150605587	19.663162393596	8.6114816329133	2.74232091028775	4.13421116633644	17.2615226429539	6.20571558177577	7.08694891833902	7.65670562126884	0.999277663901269	Intron (ENST00000369016.8/2029, intron 4 of 4)	ENSA
cluster_1	chr1_150634809_150635779	16.1371922111023	4.0543252540711	1.22736718759417	2.48532952036215	17.3019613121181	9.62715484059808	5.09378252032706	3.0580002320954	0.998851861562716	Exon (ENST00000702956.1/112268239, exon 2 of 2)	LOC112268239
cluster_1	chr1_150971899_150972450	12.2905163910863	10.1226396095277	4.23362486504378	3.6154066081978	14.556752335806	12.7057993282374	6.9670143949371	2.06865327101534	0.934743499625164	Promoter (<=1kb)	CERS2
cluster_1	chr1_150981086_150982020	22.5423627574238	8.86282367384675	2.56133884713052	4.55478444808166	27.2585920250966	7.65019526721336	4.05801078073415	6.62590146656056	0.999938213816896	Promoter (<=1kb)	ANXA9
cluster_1	chr1_151024388_151024991	10.7019083470022	4.88065730500632	2.36637334741313	4.51586564925867	14.7644126829578	4.85439013621451	3.03144476339904	4.08039620643875	0.999370736704757	Promoter (<=1kb)	PRUNE1
cluster_1	chr1_151131048_151132312	29.7164474923868	12.3856239855207	5.23531186067558	11.2833702123797	30.7447238034378	18.341550494271	16.9790135930695	9.06618364109651	0.996841457499234	Promoter (2-3kb)	SEMA6C
cluster_1	chr1_151133061_151133709	15.8124551934408	3.60282517370791	2.58818605700138	2.43051475132718	17.9012001391857	5.82003247882602	2.17336714441994	2.41202084084306	0.999977424885724	Promoter (1-2kb)	SEMA6C
cluster_1	chr1_151512919_151513368	27.829054652031	8.93344575950029	0.930397946293626	2.31986492459191	23.4812130743548	3.84534891728093	4.18824607771999	4.34757782121266	0.999815314336457	Promoter (1-2kb)	CGN
cluster_1	chr1_151593745_151594603	10.4763246919675	5.71154852659023	3.58880132052967	3.91708844370099	11.0115416043312	4.41685340451496	2.85858939361663	5.30262111663523	0.999611445842296	Distal Intergenic	SNX27
cluster_1	chr1_15186557_15187458	9.39221846493346	2.92410800499095	1.47623705094568	2.20598187704019	10.6893361493036	4.22547659877116	1.52345242373592	1.43283736254351	0.999926328291757	Intron (ENST00000428417.5/55092, intron 1 of 2)	TMEM51-AS2
cluster_1	chr1_15196838_15197558	10.1223334843195	3.61656572992818	2.22540653050312	2.02058671533956	14.0424011989902	4.98825175682195	3.23056354529795	8.19072565798735	0.989905764140517	Intron (ENST00000428417.5/55092, intron 1 of 2)	TMEM51-AS2
cluster_1	chr1_153122796_153124230	15.8972107834536	6.08467977717036	0.532464668261667	1.81227510597851	17.7155348485199	2.28664531734314	1.65125369164808	4.02286044084649	0.999840397919948	Distal Intergenic	SPRR2F
cluster_1	chr1_153494804_153495504	15.8128924586486	4.88794602226552	4.7376937825291	4.92196495025106	13.301305332911	5.3648903269078	3.94288865319764	4.69486118497442	0.999733167158655	Distal Intergenic	S100A7
cluster_1	chr1_153598530_153599295	13.2325010195903	2.63011740899713	3.00321209588787	2.6337973196921	17.841230373779	3.53421919957454	1.75026336330571	2.18067252836009	0.999741663338432	Intron (ENST00000647794.1/ENST00000647794.1, intron 1 of 1)	S100A16
cluster_1	chr1_153697169_153698771	12.3880587101887	5.50659182122874	5.29909414799194	2.22997083993507	13.195612841556	3.89911999967187	2.46575794477166	1.77804271541425	0.999356710273757	Distal Intergenic	MIR8083
cluster_1	chr1_15430854_15431561	10.1946725106748	5.82324712463339	2.58353874092178	5.50730761370843	11.4084734324944	5.69199197608994	3.92962784899654	3.06345778010449	0.998804157558066	Distal Intergenic	CTRC
cluster_1	chr1_154501467_154503228	9.06523864408128	4.66671884739767	3.42484799600203	2.46077410302014	10.1720064272111	2.56832877664562	2.98342583973177	1.8407461469388	0.999628146383608	Promoter (<=1kb)	TDRD10
cluster_1	chr1_154609327_154609814	21.0839186723618	5.23144170950124	2.25565366628295	2.36636521913678	19.4226443689417	4.03649012656659	2.07792346331905	2.50715302005418	0.999986531687945	Promoter (<=1kb)	ADAR
cluster_1	chr1_154972493_154972934	42.7963072899084	15.0613557438099	4.88681857822575	2.72938288876041	37.0677539485084	18.7189390225265	11.3551483482869	35.6560068535532	0.959567520678456	Promoter (1-2kb)	SHC1
cluster_1	chr1_154993048_154993724	11.2991035914109	4.46734919387712	2.47681333922956	5.72324546160493	8.82179133553595	3.54775454603919	3.16078827368986	3.14145879088606	0.995634549583854	Promoter (<=1kb)	LENEP
cluster_1	chr1_15508525_15509453	23.876403883524	1.05010809477454	1.11788996485943	0.831496799160714	27.443280301343	0.907398802037445	0.437682956625994	1.50820959267495	0.999923937330652	Promoter (1-2kb)	CASP9
cluster_1	chr1_155165971_155168182	19.7891157132751	18.0545160628091	7.97224006907768	9.28123477958085	19.1660820046284	13.2667991675249	8.95973526642768	5.73475761286248	0.968580815801489	Distal Intergenic	KRTCAP2
cluster_1	chr1_15584295_15585334	16.5675738058001	8.64232172262033	2.10939952947904	1.79168029640165	20.6573211999946	7.5099634367289	4.20967824604694	2.84388992295482	0.999633445679719	Promoter (<=1kb)	AGMAT
cluster_1	chr1_155984278_155984808	22.5291929128525	5.46222660829808	1.24601544150858	1.86125401824877	25.7649634694121	3.71280164290907	1.77518271601616	2.65050134856722	0.99999315955097	Exon (ENST00000462460.6/9181, exon 4 of 26)	ARHGEF2
cluster_1	chr1_156025843_156026365	13.0922664947763	7.61095270177643	5.4820405484687	3.27810227690087	13.8971851635531	11.8633278437398	5.49404655648245	2.54200305007375	0.978198626665509	Intron (ENST00000650235.1/105371729, intron 3 of 3)	SSR2
cluster_1	chr1_156060767_156061826	30.4875376233687	13.8009116656555	2.05025340754779	1.82117244546026	28.0519614082365	5.49387094612625	1.71723334511882	1.69983572046345	0.999610745944731	Promoter (<=1kb)	RAB25
cluster_1	chr1_156073693_156074147	25.5789000134432	20.2264962486595	8.58555559580432	3.94184188416238	26.3179447533379	23.4806164209625	15.8484873328753	4.92827344200148	0.926401497054681	3' UTR	RAB25
cluster_1	chr1_156076778_156077200	22.3608671465466	7.53662046904838	4.236296123115	3.87729035957768	21.136640612302	8.99412581494365	5.35367357869173	8.43484014455694	0.999869488108178	Exon (ENST00000532414.3/92312, exon 2 of 2)	MEX3A
cluster_1	chr1_156149480_156150811	17.4211557103142	6.06482381448606	5.10066488875408	11.0867978183299	21.9871872563839	8.00708288206264	3.94184450832207	8.4903580319608	0.994993349944391	Promoter (<=1kb)	SEMA4A
cluster_1	chr1_156181314_156182405	18.0302934621577	10.4140921220335	3.0310170096733	3.396824785187	26.7019782947341	12.4631867640175	8.8715817058527	3.80775301869399	0.99602287253584	Distal Intergenic	SEMA4A
cluster_1	chr1_156245463_156246247	17.0777767025847	5.14597048001611	2.39120338734224	2.0585882419917	15.238670584305	8.70755734744102	2.37547919560863	3.83926240365525	0.999383289034342	Promoter (1-2kb)	PAQR6
cluster_1	chr1_156356730_156357395	24.5029851692948	6.68597909063772	3.10594534289929	5.1725240061609	26.7754873920845	3.30803308809845	4.19830248403163	6.47482681002185	0.99986780063707	Intron (ENST00000413555.5/7203, intron 1 of 7)	CCT3
cluster_1	chr1_156368755_156369642	18.3706515056377	4.64099546550093	3.45676370950014	3.0980278878992	13.507182203919	6.03652071240163	3.9492672709856	6.21872361647062	0.998758194566593	Promoter (<=1kb)	RHBG
cluster_1	chr1_156401637_156402353	10.8323654746649	1.73159346739485	11.8724700391944	12.6222846829753	14.5611942240933	3.07339842112513	1.90996446161621	1.18460840698308	0.721260103743926	Distal Intergenic	MIR9-1HG
cluster_1	chr1_156421268_156422848	21.7163004872349	7.56214946103907	10.2668110066331	17.3807436728378	22.1738581122526	7.1084340118486	5.31162515926145	3.89313364417421	0.964539505997865	Promoter (<=1kb)	MIR9-1HG
cluster_1	chr1_156480606_156481278	11.4123072434129	5.56881883714357	3.20366992748301	6.32444729277233	14.39763441087	4.98666084142605	4.43722401977167	6.92145190122061	0.997444923409844	Promoter (<=1kb)	MEF2D
cluster_1	chr1_156503277_156503623	39.1673145903701	8.6480976834597	1.88601686975458	6.05400115189422	32.6008297295338	6.5265251441508	6.50989755538667	20.2185289181336	0.99491205837156	Promoter (2-3kb)	MEF2D
cluster_1	chr1_156692539_156693596	36.1127070818547	27.0346250370667	6.90378319170925	3.86830123669898	42.1161687435055	20.475077897665	10.5416372807873	11.767510312469	0.99546250182912	Intron (ENST00000650347.1/ENST00000650347.1, intron 1 of 1)	CRABP2
cluster_1	chr1_156813477_156814595	17.9486739338661	8.1659007192264	8.5434948701831	4.20621048804861	20.445001912204	10.2604531823008	10.5613583998162	6.32559716608544	0.998274710772806	Promoter (<=1kb)	SH2D2A
cluster_1	chr1_156876076_156876753	13.4530245867857	6.69528360465867	3.31402203116143	6.81879014157208	14.9962494333232	4.24675571397507	1.198356700244	1.85223444867372	0.997054317887029	Promoter (1-2kb)	NTRK1
cluster_1	chr1_156927398_156928189	19.658004445148	8.18366367866815	6.30402211735208	6.1840564021266	18.5792011236847	14.1764523682333	8.73616594745696	9.8090502888036	0.996253224070593	Promoter (<=1kb)	LRRC71
cluster_1	chr1_157074069_157074738	13.6262022307359	3.22809300896465	3.391264322916	3.19673878399026	9.68641887474295	4.36214847783708	2.85101949303367	3.87780713318705	0.99845163882814	Exon (ENST00000414328.2/ENST00000414328.2, exon 1 of 1)	ETV3L
cluster_1	chr1_157155730_157156475	17.6632958995942	7.96355064727044	6.65529749710345	5.05328611349261	17.2587195969396	10.7846653684144	7.87271765186504	3.79800568453126	0.998776150300997	Distal Intergenic	LOC107985211
cluster_1	chr1_157161955_157162706	11.7262777199793	4.21206408148546	1.25816994466229	1.29044948268737	20.9647642209148	2.52691388297899	1.97972304560908	2.96590270547271	0.998259842304244	Distal Intergenic	LOC107985211
cluster_1	chr1_157163292_157164075	19.5207005175117	3.62709043682323	3.73311165884373	6.00107133763101	24.3182024284501	3.42231608808774	4.63404798035501	3.38462600472141	0.999524629910328	Distal Intergenic	LOC107985211
cluster_1	chr1_15791937_15792426	15.5337006254626	8.65113777306118	5.24370653911334	4.58771428623649	15.9414698502239	5.51508297434243	4.541650213287	2.94169070591416	0.999653842922006	Distal Intergenic	FBLIM1
cluster_1	chr1_158117825_158118338	21.1198380875604	7.10471658490327	9.11073749288677	5.12054344386985	20.3159708197277	3.63876297523257	4.82146558446777	4.76596290851843	0.998743236326896	Distal Intergenic	SMIM42
cluster_1	chr1_158180741_158181740	18.683507347077	5.82572597378957	10.1560998883017	10.5289886710847	16.304353240586	7.68078303295648	9.10269454602991	7.94252154485298	0.989298176195154	Promoter (<=1kb)	CD1D
cluster_1	chr1_158864440_158865090	12.3612256247309	5.1584025421422	4.23787811745303	2.36195162781408	17.7213845598282	2.11053639619066	3.10392149732292	2.38235104053605	0.998989262443696	Distal Intergenic	MNDA
cluster_1	chr1_159005626_159006887	5.77654615537965	3.51359579029004	1.5827444608693	0.757390869943937	8.92922643929769	3.22011939482116	0.738626393185958	1.35468117562772	0.997683037287817	Promoter (<=1kb)	IFI16
cluster_1	chr1_160095755_160096260	22.5344209648107	5.93119103429914	9.72274719087211	3.99053715848743	31.0698284371142	3.76573996489956	3.17691461501344	4.64990229185365	0.998450395333632	Promoter (<=1kb)	IGSF8
cluster_1	chr1_160115463_160116187	16.7703766564092	8.46082194553687	3.36619696825949	2.70111187979997	15.0430495162512	6.98565050640666	4.63901011368807	7.04564225806793	0.99913248382085	Promoter (<=1kb)	ATP1A2
cluster_1	chr1_16012602_16013613	24.6719167244399	10.472070732808	3.70228848234607	5.45506634858015	31.2146156764322	12.3665238561897	8.67223328432558	10.4894860658325	0.999571304670719	Distal Intergenic	HSPB7
cluster_1	chr1_16026308_16027299	32.511323291954	16.447458351704	6.36029611902862	7.87133505661678	33.4279175606726	12.6277328485005	11.6061697655948	3.93436218293439	0.999660525958864	Promoter (<=1kb)	CLCNKA
cluster_1	chr1_16048208_16049253	24.9559099906442	14.631180151933	7.11417476175771	8.37218798952981	28.8887590595826	19.3201948508024	15.4468848526145	9.84505908839165	0.994579739481698	Promoter (<=1kb)	CLCNKB
cluster_1	chr1_160651916_160652893	13.1468944147136	4.63141115228913	2.20613791711795	2.79021374990038	13.4212153728647	9.04878506984255	5.62797759364639	2.4197941882976	0.996468965117696	Distal Intergenic	SLAMF1
cluster_1	chr1_160681347_160682075	13.3270300650193	5.40960672496084	5.39713900999968	3.26779042340128	14.0008210296196	5.4199382959879	4.79357484934073	2.99142633818773	0.999885136748288	Exon (ENST00000368046.8/962, exon 3 of 4)	CD48
cluster_1	chr1_160954135_160955109	14.2861429191247	3.6268052342346	1.08472396252614	1.82920384143666	12.5534043455623	3.45209035868848	1.71815395067644	2.38082390350782	0.999968868550427	Promoter (<=1kb)	ITLN2
cluster_1	chr1_160981264_160982575	23.3921489299191	4.4986260683857	2.07029187796204	2.24161569804082	26.6342949631388	2.55901243130607	1.82809656425183	1.5647447477464	0.999978360135711	Distal Intergenic	F11R
cluster_1	chr1_161013545_161014234	19.2049713850582	2.33504246400199	1.68380513566496	1.36465170904835	14.1532352732305	1.63294830162347	1.61551874757578	1.93181268563823	0.999495204925151	Intron (ENST00000368026.11/50848, intron 1 of 9)	F11R
cluster_1	chr1_161020065_161021700	34.0233682052489	17.5602880268561	8.28093030975271	13.5629908373371	38.2089479046321	12.364104898309	11.8492587548361	12.7128677920392	0.999864202928239	Promoter (<=1kb)	F11R
cluster_1	chr1_161038227_161039219	21.3281672896285	8.89392691181848	5.2823272511464	6.77924360262783	22.9314275942511	8.83424816737099	11.6162551400335	8.53312381044269	0.999516754370824	Promoter (<=1kb)	TSTD1
cluster_1	chr1_161198245_161198719	20.7372402734279	7.12542873969397	8.62020695481028	3.44461466935807	26.8096901638116	8.83725665164449	9.41718440248722	5.8491215773249	0.999148498424798	Promoter (<=1kb)	ADAMTS4
cluster_1	chr1_161305728_161306705	37.7656652314829	15.6363900731628	12.2118610144448	13.1957055314198	40.0195458465403	17.1268157056834	11.4753046211081	8.77941238933289	0.999965429621843	Promoter (<=1kb)	MPZ
cluster_1	chr1_16162342_16162979	27.0597887368291	8.57106257814306	2.64673016051305	3.73544565715363	22.8684089874852	11.2458330632071	6.26422632011851	2.25470003097944	0.999576691588465	Distal Intergenic	EPHA2-AS1
cluster_1	chr1_16212357_16212976	27.1820073912075	9.40625007103592	3.65602169097749	4.34635549646216	29.0532707404925	5.90925202886324	4.1325837954291	3.85703398878847	0.999991323308089	Promoter (<=1kb)	ARHGEF19
cluster_1	chr1_16215875_16216679	38.476523818434	25.0349762323235	8.65683357803546	10.7164080441331	43.0806055014305	22.4113659752601	16.5227438455014	9.12237287219355	0.998360860967465	Promoter (<=1kb)	ANO7L1
cluster_1	chr1_162229984_162230534	18.2142999141055	5.39870514528285	3.88162650859766	3.69701416780678	19.507585056483	7.18299102199642	2.28894634111264	3.240022693071	0.999968730740919	Intron (ENST00000361897.10/9722, intron 2 of 9)	LOC105371475
cluster_1	chr1_16226394_16227483	27.0580076456463	14.7332596374091	4.4605071985326	3.87741952063951	24.5360736760823	14.4042686312332	9.60416947028397	5.33170063971818	0.997789872943822	Promoter (<=1kb)	ANO7L1
cluster_1	chr1_162822234_162823216	20.9270082620832	6.77957900050034	10.1322326845468	10.9950712001553	20.6835949218542	6.10193554686007	7.00650648241897	7.87481629703062	0.995965676029239	Distal Intergenic	HSD17B7
cluster_1	chr1_1628697_1629441	19.1303832347963	4.13933428620544	2.9866280504693	4.7938934831115	21.1505603995225	4.6551867885662	2.34935861349515	2.66762213951504	0.99994393898138	Promoter (<=1kb)	MIB2
cluster_1	chr1_1630205_1630692	19.0967128021168	5.31374763009077	4.10855661725599	6.69956432401005	22.3964401596263	9.6969228510706	4.66703114629043	1.85049370273617	0.99937606887149	Promoter (<=1kb)	MIB2
cluster_1	chr1_163202773_163203647	25.6451801769035	5.05628781326254	4.60141837335765	2.77873223556172	25.1973358522365	7.7479367923693	4.56910827643825	6.61520905017602	0.999953795010317	Promoter (<=1kb)	RGS5
cluster_1	chr1_163399841_163400572	25.0491131650254	4.61461645967969	6.29062292974252	7.83632182163816	27.8800091134798	1.62494374670768	3.24247295854421	6.51685177599489	0.99864693434042	Distal Intergenic	NUF2
cluster_1	chr1_16490846_16491759	13.9545461021593	4.16039816024656	1.7220603657504	0.802696236193851	8.85860924541972	5.65759806395215	3.21308578340173	1.87024082026895	0.995744084060404	Promoter (<=1kb)	CROCCP3
cluster_1	chr1_16618796_16619141	31.2277648072764	9.23180378880627	3.21653306230155	4.29941558002655	32.9676970218096	4.70747373575753	4.89302776226766	3.11152819625511	0.999983767769728	Exon (ENST00000639481.1/84809, exon 4 of 4)	NBPF1
cluster_1	chr1_16620341_16621452	33.434859693564	40.5336832974464	12.0572531783952	9.52681060548888	40.0737607113613	30.0536606599783	16.0440387361057	12.6548131747874	0.881712374049853	Intron (ENST00000639481.1/84809, intron 2 of 3)	CROCCP2
cluster_1	chr1_16624942_16625291	30.7002155557047	6.062590090469	5.81161837534458	6.70824324260749	31.9013464985079	9.91050656472791	5.24737995019067	6.71455075656386	0.999962446576546	Promoter (1-2kb)	CROCCP2
cluster_1	chr1_166883866_166884716	12.3367534049423	6.71775387675509	8.28428905984546	2.84655575107873	13.7293065622814	6.96346276528904	5.72273859985528	2.99584579682462	0.992453906792871	Distal Intergenic	TADA1
cluster_1	chr1_166920366_166921569	10.6951186860779	3.78117720916625	2.03903910848736	1.52233179715286	15.3748412453582	2.84238657024759	2.68439913712543	3.43692373499437	0.999567408160176	Exon (ENST00000271417.8/387597, exon 9 of 10)	TADA1
cluster_1	chr1_16707301_16708314	10.3183244773372	7.11957523978979	2.53946887482333	1.83886408960282	10.7842784497547	6.78960589011767	3.61394492099499	3.35216704541673	0.995385865844212	Promoter (2-3kb)	ESPNP
cluster_1	chr1_167430130_167431951	10.3963193341313	2.67150161809065	9.39679112366262	10.8733466775054	10.3713377241867	3.97355324791299	3.6591208216666	3.13821331407382	0.70428733550307	3' UTR	CD247
cluster_1	chr1_167683781_167684421	15.9224806555825	2.95443933710211	2.72100402499135	2.49853291764194	9.93850433423555	3.21221849606293	2.48877993629086	5.42223098326663	0.99463918925757	Exon (ENST00000537350.5/92241, exon 2 of 6)	MPZL1
cluster_1	chr1_167796783_167797533	16.2471243706074	1.85294577219694	2.24770321276195	2.18385871942925	10.6491261330877	3.26564334005481	4.51523246503288	14.628411818612	0.881552123860212	Distal Intergenic	MPZL1
cluster_1	chr1_167803262_167803940	15.1920992803211	4.51233902861842	4.46735817699188	1.66261811273984	20.1297124836139	1.55363263361196	2.26606369133633	4.21649912806372	0.999253070370807	Distal Intergenic	MPZL1
cluster_1	chr1_168145502_168146264	18.3503042739663	6.32245163353483	6.03178262444377	3.81759887470142	9.24756693849658	4.97725929840561	3.55887084841004	4.3960950517069	0.979675547542149	Distal Intergenic	GPR161
cluster_1	chr1_16872125_16873250	18.7115442586415	19.0613660917968	3.93089289641919	3.534947413659	12.7527323526742	16.2713236999552	7.49930523767177	3.37647318123781	0.711656662058797	Promoter (<=1kb)	LOC112267871
cluster_1	chr1_16921275_16922175	51.675848918664	20.3971369984969	10.6189878950751	14.5746027671469	49.3125707570333	29.6881420060205	24.2379734527514	13.9896904379246	0.998947321190301	Promoter (<=1kb)	CROCC
cluster_1	chr1_16938633_16939995	21.9949010305538	8.31585532132902	3.99700335074518	3.00906257757448	19.8488158819975	11.271315539801	4.65198398122302	2.80581286811451	0.999375788621526	Promoter (<=1kb)	CROCC
cluster_1	chr1_16960541_16961432	26.2686292395694	12.2385692614247	7.84633099745331	4.03038273158745	26.7352976820746	10.1967112016689	12.2663731145418	14.1009397561123	0.998151472629868	Exon (ENST00000375541.10/9696, exon 27 of 37)	CROCC
cluster_1	chr1_171219807_171221118	20.3270665957337	16.402913514926	10.079172535564	4.0481792736134	18.9388579836621	13.1118079049816	9.80971999575791	5.34768887972418	0.971410995339605	Intron (ENST00000669750.1/105371611, intron 2 of 4)	FMO2
cluster_1	chr1_171431723_171432661	12.7293196856608	1.05551457942222	0.996007154454676	1.0522804823748	16.5619694935896	1.23605940457214	1.22907299487338	2.26758037934558	0.999760046114785	Distal Intergenic	PRRC2C
cluster_1	chr1_171641174_171642013	17.6130066617228	3.16367764429654	2.43468387993724	1.24041653466456	18.7236033905021	2.11007655499713	1.96207264982934	2.77093865999835	0.999964905823837	Intron (ENST00000638471.1/4653, intron 2 of 3)	MYOC
cluster_1	chr1_171644864_171645556	18.5027174651626	6.04599444059357	9.35356896303331	5.01682111395751	21.0505160273209	6.92899640536109	6.49620359679687	7.4238925435602	0.999165048017461	Intron (ENST00000638471.1/4653, intron 1 of 3)	MYOC
cluster_1	chr1_171655249_171655866	14.3817238249411	2.50209199290367	2.35915488735948	3.23590594066927	10.8637044024931	3.10653876088002	2.39764552063706	7.92994541313128	0.989505654960026	Promoter (2-3kb)	MYOC
cluster_1	chr1_173861470_173863327	28.1583845942326	5.09349706029195	2.30844363898593	2.05277152617389	23.0952966165521	5.80339671235475	2.48228229256728	1.53529393769364	0.999923205484085	Promoter (1-2kb)	GAS5
cluster_1	chr1_17406078_17406579	25.694146323373	7.23108526670971	8.84421411396931	7.89754286340729	22.2479258395647	11.7048008943908	8.29917202465969	4.08196192909349	0.999026330128924	Promoter (<=1kb)	RCC2-AS1
cluster_1	chr1_17469750_17470897	22.5336048788799	2.84435035970377	0.712340293104861	1.32876356219009	19.6575870718306	0.607857590836004	0.483615783467371	0.843535445802875	0.999900921570486	Distal Intergenic	RCC2
cluster_1	chr1_17494034_17494685	22.0411886789758	2.29764263830384	1.91184154333837	1.73447195160207	20.7334319232882	3.25383272404151	1.24370825990533	3.36856650500996	0.999938857077219	Distal Intergenic	ARHGEF10L
cluster_1	chr1_175146498_175147200	18.1266625041344	3.93585979194024	10.9041983197452	4.64930740830951	17.3432193036096	5.86631083685268	3.89833505773167	5.30489702788166	0.993117179735229	3' UTR	KIAA0040
cluster_1	chr1_17547030_17547619	12.8466059738097	6.08235764338829	2.26972338181204	6.20002783351542	16.4407477952478	4.19775904210379	2.44418787005848	1.72503955214971	0.998553160466281	Intron (ENST00000361221.8/55160, intron 1 of 28)	ARHGEF10L
cluster_1	chr1_175865119_175865895	18.0459244849725	3.96396941405299	10.2626345565193	16.0090996233616	22.4007861976918	2.95232855051038	1.04554087011765	2.91428807861692	0.936804841545655	Distal Intergenic	LINC01657
cluster_1	chr1_17587575_17588744	13.2172726071802	6.39929849866526	3.01147545930597	2.35068087287392	11.6011647887751	6.197883917194	3.58664124942311	5.14556972897896	0.999318640659673	Exon (ENST00000361221.8/55160, exon 3 of 29)	ARHGEF10L
cluster_1	chr1_176948944_176949469	17.3972330075492	6.00266533111904	3.12384186859006	5.04006076317255	17.0625991557621	6.47355690882343	4.69838402365146	2.92073630495975	0.999965618751604	Exon (ENST00000367657.7/460, exon 12 of 23)	MIR488
cluster_1	chr1_177044263_177044921	25.3223859067914	4.37822963578877	2.83595446473717	2.65596975806485	19.9345321425097	3.72634869329485	3.46252721232433	1.32790694630876	0.999769116975811	Intron (ENST00000367657.7/460, intron 2 of 22)	ASTN1
cluster_1	chr1_1779999_1780532	21.891199003463	5.24035994096739	3.72542770979912	12.490466327598	25.8587631923925	4.81520505393053	3.73110882060049	2.1948015408254	0.995959070868213	Promoter (<=1kb)	NADK
cluster_1	chr1_178037401_178038306	27.13846204598	6.21969013832646	6.74145221000891	2.53880609235447	26.0870769882933	8.62072647334999	6.06209899818459	8.08826265992353	0.999866952595466	Promoter (<=1kb)	CRYZL2P-SEC16B
cluster_1	chr1_1782098_1783268	23.8453985958787	4.58300514159007	1.96434632850908	3.50206929091728	19.3317093288637	6.09834122446571	2.45957117390982	12.3066308253517	0.994797572717705	Promoter (1-2kb)	NADK
cluster_1	chr1_178266480_178267166	38.7101634719773	8.1766930594354	11.1609063097268	5.44110449737181	45.2491623642916	4.33352574574794	2.8094000056663	2.21465889576825	0.999621592186453	Intron (ENST00000367649.8/9462, intron 1 of 17)	RASAL2
cluster_1	chr1_178282906_178283900	12.059713229304	2.07126261168483	3.29383578871458	2.9056301989058	15.1927354590911	1.04194575315239	1.78919422550459	2.0011358042841	0.999195954466802	Exon (ENST00000367649.8/9462, exon 2 of 18)	RASAL2
cluster_1	chr1_178320079_178320927	15.2151543444558	7.90584648268245	9.16804938898811	5.00350290093237	17.7997521747121	6.82280389254259	6.42798393477605	5.21701031918595	0.998792835522644	Intron (ENST00000367649.8/9462, intron 3 of 17)	RASAL2
cluster_1	chr1_178575593_178576294	7.72187617528141	2.24188514899146	3.05563450083962	5.43320554409282	9.69802082703869	3.14581411087604	3.47244604431043	4.97627977890609	0.984496297873621	Distal Intergenic	C1orf220
cluster_1	chr1_179087551_179088323	13.0713341146389	2.93147964907094	2.78044553890266	2.02097801069674	14.3895010651446	3.77612057839421	1.20237491488942	1.97948936864056	0.999970002668661	Promoter (1-2kb)	TOR3A
cluster_1	chr1_179529337_179530091	23.2140845448004	6.23727167264276	3.84302100482325	1.72139054112511	23.8705050109171	1.17382971859492	0.934778193268259	0.377423146695074	0.999852412159869	Intron (ENST00000617277.4/126859, intron 22 of 24)	AXDND1
cluster_1	chr1_179575249_179576250	11.4745898444722	5.20578638691949	6.24604232062616	3.18437065567386	11.1279232488844	4.58533809092672	3.62189913519809	1.98120392445957	0.997617260594326	Promoter (<=1kb)	NPHS2
cluster_1	chr1_180167828_180168658	18.4400000657214	7.01917387677046	2.65504853474601	1.9899784439315	21.1336560393556	2.97988586160914	1.3994494552137	1.63668988492066	0.999928293160104	Intron (ENST00000367602.8/5768, intron 2 of 11)	QSOX1
cluster_1	chr1_180234484_180235294	24.8193797799198	7.64047854718222	4.39492023952865	3.52133045626233	23.930499947703	9.02561977849046	5.77712057715749	4.94799218279732	0.999992064163173	Intron (ENST00000263726.4/89884, intron 1 of 5)	LHX4
cluster_1	chr1_180269946_180270548	17.0484573030866	2.84872622597743	2.69457891611574	2.93398422542731	20.0959936464409	4.14567004720415	3.91014181833298	3.38544925831682	0.9999226921644	3' UTR	LHX4-AS1
cluster_1	chr1_180923008_180923878	39.2628334181972	11.8319193808159	4.80927742534872	6.31997304238734	42.3376485266	16.6145532407008	15.8192323704339	9.93636087911362	0.999787387548582	Intron (ENST00000367588.9/57710, intron 3 of 8)	KIAA1614
cluster_1	chr1_181038341_181038952	10.4833783883164	4.23683295162934	1.69620202464069	2.41290362933311	18.0002854543619	2.76774366990683	1.87198766198489	5.01665109986495	0.997016957744795	Intron (ENST00000614012.5/3140, intron 2 of 6)	MR1
cluster_1	chr1_181101506_181102288	29.38597946061	5.03985428024952	5.4145681245814	3.56316402169307	26.8326127669897	6.28405891107577	2.48194715281028	6.95803383833607	0.999852261916285	Distal Intergenic	IER5
cluster_1	chr1_181152859_181153457	7.28280040007016	2.50962334371337	3.76425247857502	2.13012132285372	9.53625814648171	3.98146273867378	4.66676076828486	8.64344540944091	0.895814699723442	Distal Intergenic	LINC01732
cluster_1	chr1_181969664_181970689	15.1476803125408	2.50479400089942	2.00734021640869	1.22388184784861	21.4941683683389	1.90936099235636	1.51152127568931	2.08667445234988	0.999715805400078	Intron (ENST00000671017.1/ENST00000671017.1, intron 1 of 1)	ZNF648
cluster_1	chr1_182806030_182806686	18.05010443114	3.78865835064641	3.11698890832802	2.94176526517723	15.8785896446811	4.11844768057796	2.80147205939494	2.04705771072747	0.999937924417486	5' UTR	NPL
cluster_1	chr1_18294580_18295306	34.0543316553466	1.23314222069304	0.600434367541187	2.69533100358288	28.284795622848	1.80115882399528	0.898033498261142	1.0626938338805	0.999784327547418	Intron (ENST00000251296.4/84966, intron 3 of 9)	IGSF21
cluster_1	chr1_182957753_182958445	17.5971970495498	2.42218713395408	1.43933119212613	2.13749074021524	21.621770439152	0.741452707495727	0.706005385569298	1.25998881194081	0.99985934164371	Distal Intergenic	SHCBP1L
cluster_1	chr1_18298131_18298912	32.777655101445	1.79744756654497	1.38158596323847	2.01934150088226	27.6459719442509	3.92770867286343	1.31672164673716	1.3460567639693	0.999884186980709	Intron (ENST00000251296.4/84966, intron 3 of 9)	IGSF21
cluster_1	chr1_183185695_183186588	27.3038346405348	13.0780668264148	5.95893892181302	8.46272062827526	23.4699335888635	7.05644736058051	7.08635461324185	4.13167029845958	0.999200964270861	Promoter (<=1kb)	LAMC2
cluster_1	chr1_18418508_18420278	15.2410053297437	1.69991018142738	0.547807199998797	1.33439446715196	13.4587721900174	1.51368436679074	0.868331556064439	1.09198614360314	0.999936126135375	Distal Intergenic	IGSF21
cluster_1	chr1_184663829_184664606	18.1160510167733	9.18752684105511	10.5629916530958	6.01749915205691	21.5581501315676	11.4070556526951	9.53975200046553	7.75345729936118	0.998892852066762	Promoter (<=1kb)	LOC105371648
cluster_1	chr1_185733755_185734865	25.0627551342982	10.8650425601477	17.0434440194462	6.63745413101011	25.4173385306437	11.5820704472478	12.6021624371248	6.97476094950012	0.991572521850436	Promoter (<=1kb)	HMCN1
cluster_1	chr1_18575524_18576098	21.1434803229445	7.78042112032264	2.21196115478044	3.55778059979186	15.1290404176476	5.40214257689204	3.56842571664499	2.75914671218167	0.999020505607865	Distal Intergenic	PAX7
cluster_1	chr1_185912045_185912955	16.5856908753514	1.45508263405537	0.880216018271655	0.674740904902135	14.4379004136894	0.532093107642145	1.21326043533692	1.7896355259059	0.999827825386552	Intron (ENST00000271588.9/83872, intron 6 of 106)	HMCN1
cluster_1	chr1_18630626_18631843	19.8623051643703	11.3106550661704	3.54452176221735	2.01871116507179	17.3065120480897	16.2481845833008	10.8673609094873	2.37554356181911	0.951560256743324	Promoter (<=1kb)	PAX7
cluster_1	chr1_18637552_18637978	17.3701332489307	15.8348046136548	3.89156193958115	3.69881605381205	15.0916975454394	11.8278043293945	5.42362409406081	1.06471161303625	0.93073284169696	Intron (ENST00000420770.7/5081, intron 4 of 8)	PAX7
cluster_1	chr1_186637205_186638024	17.6521638512161	6.46592505960482	5.63813422596049	2.32671026542224	12.4386349888171	3.50917408256635	3.66269331665759	2.80831781062121	0.997245404126667	Distal Intergenic	PTGS2
cluster_1	chr1_18693532_18694268	13.8784194109601	3.02388683667426	0.775156088773272	4.07254377855086	23.0332291185399	5.15534253279727	2.48763785326015	3.09484428240595	0.998436523288741	Intron (ENST00000420770.7/5081, intron 5 of 8)	PAX7
cluster_1	chr1_18702893_18703722	11.9917474926847	6.608791699397	3.61169815867399	2.66698094978037	15.7288454387151	4.36385969168617	1.895415813717	2.15851451254945	0.999455387193092	Exon (ENST00000420770.7/5081, exon 7 of 9)	PAX7
cluster_1	chr1_18912970_18913597	11.581080848941	6.67175655536662	3.1342301673369	3.62119347883568	17.3701446537768	10.4819801966065	4.55059635852597	5.01872363262931	0.992413667255052	Promoter (<=1kb)	IFFO2
cluster_1	chr1_193216840_193217418	24.0195816610456	3.33598303684773	2.58458955670514	1.30974118924613	15.9756473521046	2.90351963270164	1.06598073968484	1.81366505557584	0.999003101702188	Intron (ENST00000649895.1/79577, intron 13 of 15)	CDC73
cluster_1	chr1_19338115_19338805	22.6945589257607	5.33312206055947	2.38465693886491	2.35110436006691	22.7731151155294	8.65289392044206	6.3172534137664	3.89989816673481	0.999939779912359	3' UTR	CAPZB
cluster_1	chr1_19353433_19354101	20.531386678638	4.98176906755092	1.19080043189192	2.04950411264935	27.0737238337217	2.81023440074672	1.7378908033933	1.68744181901445	0.999925838672453	Intron (ENST00000264202.8/832, intron 6 of 8)	CAPZB
cluster_1	chr1_195847846_195848834	20.3667231775382	5.61317990716885	2.87477441490663	1.18741815135687	20.5028463789541	2.79729280094606	2.14467698417336	0.312786219263413	0.999966012299029	Distal Intergenic	LOC105371672
cluster_1	chr1_1959723_1960660	16.2642135074818	9.03537683162822	4.66415394741304	6.15964762703001	24.3521565139554	8.40261771296244	7.9158450770421	6.92856613992198	0.998652627461562	Promoter (<=1kb)	CFAP74
cluster_1	chr1_19653516_19654362	23.9407405122317	11.234704689457	4.77273256753158	7.97533747337129	21.9065156367364	9.1432515307883	5.84252918607279	6.16047364326978	0.99983299973404	Intron (ENST00000602662.1/100532736, intron 1 of 3)	NBL1
cluster_1	chr1_19665488_19666389	10.3703418223338	3.55995735276783	1.72595458837035	1.84629543951892	11.9805336864933	2.57473910424455	2.57788156722803	2.69005897409509	0.999977776643588	Promoter (<=1kb)	HTR6
cluster_1	chr1_196786018_196786997	9.38269355740944	2.09824769254735	1.98679574407394	2.1353049384747	11.7443175144977	2.27328449569654	3.10682725007545	1.61468670301848	0.999747202030256	Promoter (2-3kb)	CFHR3
cluster_1	chr1_196897026_196897964	8.80900218139402	2.65771240961303	3.96583913991851	2.64333984011516	8.35966319150106	1.67404883820111	2.87256317893151	1.17170616095874	0.997357521128729	Promoter (<=1kb)	CFHR4
cluster_1	chr1_19704040_19704999	14.4090486946353	6.50783911968993	4.82341336677729	4.11469410916631	14.7016983026424	7.45502055035957	7.69774254611297	4.59884516916672	0.999649773611873	Promoter (2-3kb)	TMCO4
cluster_1	chr1_19715471_19716087	31.2372263139164	12.8597348383303	9.9232776480531	14.3605125400384	31.512500954906	15.7523491419079	10.9695455363002	10.6823138391257	0.99987951062497	Intron (ENST00000375127.5/255104, intron 12 of 15)	TMCO4
cluster_1	chr1_197911133_197912002	15.5297955220269	7.45640783166678	13.8396328077668	5.13264207166965	15.8418903485472	5.96155737408165	5.07137313788885	3.302964104497	0.954313557054812	Promoter (<=1kb)	LHX9
cluster_1	chr1_19816439_19817537	14.0722660625115	2.11721444412539	0.672622545689187	1.55572753726582	10.3238808694291	1.246337528689	0.561445383976551	1.62801823279911	0.999460989523647	Promoter (1-2kb)	RNF186
cluster_1	chr1_198314582_198315465	22.3281505668574	4.62887388380963	1.47295943481563	1.52552700342001	24.9521827907218	3.43958957629079	1.44834695383164	2.3165391353094	0.999994768831554	Intron (ENST00000538004.5/140609, intron 9 of 9)	NEK7
cluster_1	chr1_19989900_19990672	20.1254134823937	2.3642070066319	0.989114524996652	1.64614601146723	22.6299867413589	1.54931441070653	1.21390068992942	0.808302370905273	0.999968609900498	Distal Intergenic	PLA2G2A
cluster_1	chr1_200038449_200039992	34.0332776713163	16.9415296850288	11.0696791824449	5.49357508578256	34.2930192007303	14.0234538932035	11.9847644617486	7.6163657835218	0.999801677130008	Promoter (2-3kb)	NR5A2
cluster_1	chr1_200048037_200048814	34.6290586743613	5.37826148446699	6.68461153528431	2.82365277760881	34.9674760981423	2.92915235633011	1.89569855133106	1.24470634770637	0.999872086263402	Exon (ENST00000236914.7/2494, exon 4 of 7)	NR5A2
cluster_1	chr1_200364209_200365400	23.4938096812335	4.09996063726187	1.56547271786816	1.66698134741957	23.7584047383914	2.35168326503728	0.719930052748246	6.83386184994526	0.999729610063783	Intron (ENST00000637430.1/ENST00000637430.1, intron 4 of 5)	LINC00862
cluster_1	chr1_200411474_200412080	27.3421326238704	4.23013018822559	2.87107495934816	2.93207772985575	26.5039208484599	5.91405990984302	10.3233588582237	2.90146178918143	0.999509133736169	Promoter (1-2kb)	ZNF281
cluster_1	chr1_200890876_200892219	23.234658405654	27.0454169651638	13.8528523537518	9.92770283001689	24.9434474244336	17.7864101612226	16.7066800569594	7.83264476365605	0.821292283967794	Promoter (<=1kb)	INAVA
cluster_1	chr1_200915794_200916893	14.6288764480959	3.01942288532974	1.47018753890357	2.79032971081244	19.1788191358225	2.04459810057788	1.0509274355821	2.92565102084061	0.999769570940224	Promoter (<=1kb)	MROH3P
cluster_1	chr1_201126906_201127820	10.1511254085753	4.10115059434101	3.98172904501338	2.33322874194657	11.2406481148845	4.07044686437975	2.61872158594208	1.69545907448304	0.999825817716677	Promoter (<=1kb)	ASCL5
cluster_1	chr1_201259319_201260436	16.1864287105801	2.23010617467382	1.40685530650428	2.48714842814495	18.0719291158083	2.57218927979376	2.04819349905508	2.68177117323367	0.999946053738066	Distal Intergenic	PKP1
cluster_1	chr1_201347513_201348554	18.290174994173	2.60061660605473	1.83047512310662	1.44879716750984	18.5364380121949	2.67420834315391	1.75874699021329	1.36367200921444	0.999987118345734	Distal Intergenic	TNNT2
cluster_1	chr1_201376238_201377251	42.1750004985715	9.68970303234714	2.7705944743132	1.25575586727736	42.7848279121469	9.29210432918759	6.99131994741009	6.40356856530381	0.999995014522298	Promoter (<=1kb)	TNNT2
cluster_1	chr1_201408115_201408833	11.6308018303775	5.15797773259539	3.02089746633493	2.27423902926089	12.0160337920995	10.8344386624403	5.07915258551775	5.2743985842467	0.977345393391983	3' UTR	LAD1
cluster_1	chr1_201481633_201482507	32.8465398820663	16.0928085445106	8.53013984527253	6.66686701011085	32.7825073620113	17.954695273769	14.0191659125386	14.4303282533424	0.999416301584953	Distal Intergenic	CSRP1
cluster_1	chr1_201614097_201614810	19.6310801372684	5.69748736854712	3.35960114565268	4.68670119384832	14.9351370529996	7.04313102407505	5.66706328402331	4.22834525852606	0.999404383178287	Intron (ENST00000685211.1/89796, intron 2 of 33)	NAV1
cluster_1	chr1_202007986_202008524	25.0604271954648	10.3354910987093	2.11973623050912	2.33768141884486	26.1749353336378	5.56820158607832	2.19234369177835	2.27562494835425	0.999941739484386	Promoter (<=1kb)	ELF3
cluster_1	chr1_202009536_202010972	34.8112389003031	15.2708145477921	4.19309744113823	5.24556342269472	32.8873990701816	19.8069286722213	12.4700364421066	7.84588316858989	0.998625975704075	Promoter (<=1kb)	ELF3-AS1
cluster_1	chr1_202105476_202106175	27.0402277298537	16.2332753857323	5.23400469118824	8.45510062547098	27.157016545165	24.249753322367	12.0897413729688	7.04416052040536	0.976637183034385	Distal Intergenic	GPR37L1
cluster_1	chr1_202118819_202119398	15.8864289609109	9.41127533919465	4.19750671845503	5.2417992424734	16.6546255829593	10.4483988598914	5.79215675540107	7.13660527492481	0.998901888957357	Distal Intergenic	GPR37L1
cluster_1	chr1_202184558_202185320	34.6392981441892	7.55025819650456	7.75371952027503	7.97601984209808	35.74392675181	10.2527142218048	8.6630669090001	7.65032849006582	0.999963279236392	Promoter (<=1kb)	PTPRVP
cluster_1	chr1_202192779_202193281	13.1466562388439	6.48419319859355	4.39417713503873	5.9202510652018	14.9252431986802	4.50935084679245	4.82680077172834	3.27374896362993	0.999641931791141	Promoter (<=1kb)	LGR6
cluster_1	chr1_202213390_202214701	17.9255529693142	5.34949027215953	2.87418507472456	4.15164260777478	20.4453851076884	5.59372229226069	3.63559755596979	4.89661717968901	0.999982463612629	Promoter (<=1kb)	LGR6
cluster_1	chr1_202236990_202237503	20.4380804747872	9.669480861645	3.93319594403794	4.54996542550662	25.8982523667495	9.11765723493932	4.40940568711492	5.02312381848226	0.999875210510195	Intron (ENST00000367278.8/59352, intron 4 of 17)	LGR6
cluster_1	chr1_202711783_202712514	16.219737713869	3.87627211583211	1.27179411301556	1.1560772614734	12.5670546953519	4.63391888048058	3.46648680913674	2.62681895823231	0.999688319689281	Promoter (1-2kb)	SYT2
cluster_1	chr1_203048477_203049181	14.4759030364061	5.40702527261638	2.95366791070022	4.86838246238496	16.7091291193841	6.73633017996255	3.75502018256615	1.6590606654145	0.999758795728507	Promoter (2-3kb)	PPFIA4
cluster_1	chr1_203117514_203118199	18.6610224194873	7.85619198647935	4.75131769001737	5.7102501315238	17.4612328756936	8.84608798617255	5.64357028707949	6.44433156144884	0.99996081132792	Exon (ENST00000665660.1/ENST00000665660.1, exon 3 of 3)	ADORA1
cluster_1	chr1_203186298_203187647	7.32812142718218	2.66462286044237	1.44091865498564	2.06308161854385	5.80441640023331	4.34974717795523	1.99628308740734	6.67813057400981	0.914352382107451	Promoter (<=1kb)	CHI3L1
cluster_1	chr1_203216128_203216980	9.89067756587952	5.6725700890015	2.43980408918015	2.71952174483697	10.8689157819236	4.57451773918609	3.15101464304955	2.83391616565388	0.99986969427785	Promoter (1-2kb)	CHIT1
cluster_1	chr1_203307552_203308186	20.4978792192697	7.98520905504111	4.78063289507906	2.80871488151559	24.763206826469	7.49555258451768	7.71686364220995	2.65815167979043	0.999816493595267	Promoter (2-3kb)	BTG2
cluster_1	chr1_203320776_203321469	12.4764970154038	4.13361093687558	2.02410646490813	3.87706489964875	9.00443652571509	4.68358131248467	2.59567049543876	4.63265696695481	0.997506154549156	Distal Intergenic	BTG2
cluster_1	chr1_203487257_203488289	38.3101013168335	16.6291821946218	16.0227144266942	8.57969829670578	40.1390705078425	21.0804358473996	18.8039636665948	10.8540730358351	0.999317454865124	3' UTR	OPTC
cluster_1	chr1_203519136_203519844	27.2869603704572	4.29317858359193	2.9949262771502	8.04957118050273	27.5489095768945	3.19932953600904	3.60825977760527	2.77285065389808	0.999600443329334	Distal Intergenic	OPTC
cluster_1	chr1_204065064_204066101	14.9001302772284	5.90941495124695	4.34656945546195	4.03246042357163	17.0389455084353	3.78756456860522	4.30512232350569	3.93493710088084	0.999931271969788	Exon (ENST00000665939.1/ENST00000665939.1, exon 2 of 2)	SOX13
cluster_1	chr1_204078105_204078959	25.3620687140332	24.0037885665807	7.98989353755836	2.90573122222277	25.2088241755412	11.558525801499	6.95977322359451	6.48377298885332	0.971160002903024	Promoter (<=1kb)	SOX13
cluster_1	chr1_204080036_204080872	49.137137145351	13.7371734084209	3.96044856747854	2.05272092140552	45.9009847232231	15.0479708839672	10.6077668947131	6.88620741938087	0.999965642548759	Promoter (1-2kb)	SOX13
cluster_1	chr1_204084241_204084838	40.5843340652074	10.7385831003104	6.37731136352378	4.27137342379958	40.3184167082485	9.54501002415513	9.30409810796991	16.2329064615446	0.99963795932233	Intron (ENST00000367203.8/9580, intron 1 of 6)	SOX13
cluster_1	chr1_204213640_204214713	17.7393946138728	5.70745878893097	5.55043811475371	6.53134267965996	22.3547009598795	7.70591276827205	5.35645124781187	4.68112148405151	0.999776600259844	Promoter (<=1kb)	GOLT1A
cluster_1	chr1_204287923_204288622	13.9315648180498	4.74301541068219	4.45198037357312	2.67834465463476	12.694606362258	3.29340335656807	2.00253268926714	2.58537705634852	0.999749336645748	Intron (ENST00000272203.8/22874, intron 1 of 22)	PLEKHA6
cluster_1	chr1_204307304_204307919	20.4880151419804	5.14393981811013	1.87986593834391	2.90835579713975	19.803139262034	8.69789704971761	3.78539835654674	10.5778770420481	0.997681003138099	Promoter (<=1kb)	PLEKHA6
cluster_1	chr1_204377604_204378685	15.5210800876137	8.61000239494671	4.8845437098991	4.45838215328553	17.8987120947847	8.51404814147751	6.29338990736051	7.22796903358276	0.999827407088235	Promoter (<=1kb)	PLEKHA6
cluster_1	chr1_204398410_204398945	10.553445568086	6.5278105263536	2.08044704674345	6.18276319980417	18.0479175679789	9.17485711501087	6.32184524659165	9.55823515990827	0.968904522946983	Promoter (2-3kb)	PPP1R15B
cluster_1	chr1_204481469_204482419	9.64893831325326	5.34196948436757	2.91979989434486	2.04694984319927	9.07621766834653	3.92548444801902	2.83504037040707	1.560193108679	0.99935383960762	Intron (ENST00000367187.7/5287, intron 2 of 33)	PIK3C2B
cluster_1	chr1_204576173_204576880	13.9595195186731	6.24336641052579	1.80249090609527	2.77371531944783	19.0054655711093	2.75888899633192	2.43547418571669	2.9340734217789	0.999677608674905	Distal Intergenic	LOC105371692
cluster_1	chr1_204692344_204693217	9.60439157104824	2.91620993819108	0.960435162535783	1.3527533740119	14.0142352992742	2.24478250693864	2.20908952062191	1.39520227975854	0.999710158615241	Distal Intergenic	LRRN2
cluster_1	chr1_204710121_204711150	26.6357898366392	12.6144503719831	6.93117470040473	5.06439938858034	26.9044721586254	14.2708598859111	12.9040678580342	3.74265075256699	0.99825994185865	Distal Intergenic	LRRN2
cluster_1	chr1_204923855_204924672	23.268347518118	3.03926549496252	3.98402214004818	9.19830557646769	13.594059686956	4.92330088406504	4.29651549275266	2.4365345549027	0.984877045726455	Intron (ENST00000404977.6/23114, intron 2 of 25)	NFASC
cluster_1	chr1_204991168_204991880	19.8609379900758	6.78712119833944	9.85158863023749	6.20113852639221	16.3335765413345	9.68852281301576	7.33906201116699	4.42746180873867	0.996413842046689	Promoter (2-3kb)	NFASC
cluster_1	chr1_205448457_205449034	40.2944812810023	23.8904306025006	5.23198362463051	2.85121938277399	48.7033854091696	16.7974977707587	13.2397999001675	3.57005646301865	0.998774379279035	Promoter (<=1kb)	MIR135B
cluster_1	chr1_205477158_205478338	8.02888618386898	1.57000712185387	1.31462954232755	5.15267093381481	8.3596817187615	2.02480625867689	0.632078724412428	11.3036984916097	0.731300965542252	Distal Intergenic	BLACAT1
cluster_1	chr1_205485219_205485953	20.0908198968502	9.61312650157766	6.4308892237905	10.2660207786316	17.6827930051581	9.65733978423802	7.32461549012843	7.22475679092364	0.999255626913292	Distal Intergenic	CDK18
cluster_1	chr1_205504244_205505582	22.8806570184918	11.9724732152206	4.31507038318769	8.08684961330089	24.8731955019192	10.9002291238602	9.97916057615714	7.9985015309211	0.999785049679135	Promoter (<=1kb)	CDK18
cluster_1	chr1_205528666_205529463	18.0484562009638	10.8949317253073	7.03288245096692	10.5916241709563	19.0038988570991	11.1286853125599	8.18762228639383	7.34369062489525	0.99936599648361	Promoter (<=1kb)	CDK18
cluster_1	chr1_205672064_205672461	30.7322184808535	9.08382401733969	1.83326276885408	2.90258272544719	28.6773784586366	9.92960001766059	8.36254343043576	10.8533213186851	0.999617857985545	Intron (ENST00000367145.4/85414, intron 1 of 4)	SLC45A3
cluster_1	chr1_205711101_205711843	13.2710747472464	7.01521476175621	2.73339767821418	5.73466737558435	13.0393239439484	6.18677179204382	4.47076077202625	3.46930102325503	0.999485154072629	Distal Intergenic	NUCKS1
cluster_1	chr1_206469831_206471733	14.922054515896	6.60753824332028	3.74491757901515	6.1473189216149	15.6064289800894	8.4790295300444	5.97190788171646	15.1136492111131	0.940572774403447	Promoter (<=1kb)	IKBKE
cluster_1	chr1_206506941_206508337	16.9908125693668	7.50805124015716	5.84936552457015	8.22017808967127	17.4691050702843	9.21525236616215	6.87528358528128	6.1587420273956	0.999873921736209	Promoter (<=1kb)	RASSF5
cluster_1	chr1_206544531_206545196	14.7581401027881	4.15689286911659	2.99445534628881	3.08257338517382	13.4422020164694	6.18059004623707	3.84471712155311	3.72340099057067	0.999937253018058	Exon (ENST00000624347.1/ENST00000624347.1, exon 1 of 1)	RASSF5
cluster_1	chr1_206658199_206659424	8.58265592836646	4.59515729993975	3.90162815795751	2.12991792147339	10.2092585178487	3.86996816552662	2.64193723156746	1.26351435329586	0.999046698839042	Intron (ENST00000489878.1/8444, intron 3 of 3)	DYRK3
cluster_1	chr1_206687796_206688359	25.3736750717844	6.5124170743417	3.31881021612741	5.0852991828269	24.2540459723006	6.21710477610439	2.80979027502988	5.19103290238614	0.999972819494878	Promoter (2-3kb)	MAPKAPK2
cluster_1	chr1_206694456_206695111	12.4379029802055	5.62335424560638	1.83443772935597	1.89054854483356	10.5582190175689	5.03174526888818	3.02655480940647	5.17813223841774	0.998758029551867	Intron (ENST00000367103.4/9261, intron 1 of 9)	MAPKAPK2
cluster_1	chr1_207032393_207033141	32.5771501975217	5.34132326473278	1.26625115285492	1.65103248822994	36.2744947913973	3.47705446307616	1.40897268541329	12.6522116102259	0.999246438033702	Promoter (<=1kb)	C1orf116
cluster_1	chr1_20722365_20722829	23.5150485557588	4.77285725463422	1.8604569159801	1.62817293587806	22.81814677052	6.41177460068091	1.33113080759005	3.29503208549478	0.999989381479166	Exon (ENST00000444387.7/400745, exon 9 of 10)	KIF17
cluster_1	chr1_207453996_207455385	14.5511195079609	6.72938458675702	4.28679486122593	4.03832993998086	15.0123317503286	6.59970414540286	4.99842434103015	4.45651473526139	0.999996485407213	Promoter (<=1kb)	CR2
cluster_1	chr1_207910606_207911434	10.4780654501738	3.15291382842178	3.35170202977444	5.11004813413683	11.5328755666292	7.61958957388351	4.06453225409238	7.45391825176835	0.98540342132677	Promoter (<=1kb)	CD34
cluster_1	chr1_208131780_208132590	12.7130149084161	7.87450137699996	2.784897707653	3.37323179781949	12.6677063022347	4.73006449677622	3.41026342026456	4.71609991562921	0.999296495632128	Intron (ENST00000367033.4/5362, intron 4 of 31)	LOC105372887
cluster_1	chr1_2091551_2092399	11.5476686152435	4.16387001047612	1.82629947822073	2.72995080659494	10.361429174228	4.74173005713039	2.0507328818983	2.09091590752063	0.999885094096303	Intron (ENST00000378567.8/5590, intron 4 of 17)	PRKCZ
cluster_1	chr1_209155228_209156031	11.4517227281761	4.3531084758198	5.12282743272185	2.22801233505069	9.18025357973577	3.22992459327649	1.38440015235054	1.34103048868399	0.99603015140452	Exon (ENST00000665387.1/ENST00000665387.1, exon 3 of 6)	LOC105372895
cluster_1	chr1_209198873_209200271	12.7078287570695	3.77478926133089	4.02306015251055	3.7996820259643	13.3767411771126	3.08378305058443	2.87984296423888	2.64320934887258	0.999845490281724	Intron (ENST00000666483.1/105372896, intron 2 of 3)	LOC105372896
cluster_1	chr1_209427861_209428955	23.5671211983873	16.17092675784	2.59036486125392	1.54471235865518	27.0681707403854	9.59409717844007	6.39620467859874	1.71799990309697	0.997142089130995	Promoter (<=1kb)	MIR205HG
cluster_1	chr1_209747480_209748489	32.9286294212672	12.1262057327009	12.9593496579729	9.73853759995433	40.562979267517	14.5427371955135	13.1920342721783	12.6864784695023	0.999819581138078	Distal Intergenic	TRAF3IP3
cluster_1	chr1_209805444_209806675	36.1820753061636	9.07014141878218	1.55289306369778	2.30917228114201	35.7129126550805	4.06890663216747	4.69392141635714	2.44124881045863	0.999985731354213	Promoter (<=1kb)	C1orf74
cluster_1	chr1_210373336_210374715	30.8031866887929	6.48801119526702	4.60518655508593	4.05219999281423	29.9406694050873	7.70202164773307	4.85865608531463	4.23541361981489	0.999993207301971	Exon (ENST00000364102.1/ENST00000364102.1, exon 1 of 1)	HHAT
cluster_1	chr1_211398277_211400547	9.54209357597618	6.38950739398141	2.25632248898844	1.7776498189127	13.3859676154289	2.4664687410052	2.05346067522996	2.17793207847062	0.998371058911399	Promoter (<=1kb)	LINC00467
cluster_1	chr1_211630103_211630776	10.6084374642107	3.46802083332589	3.11322881849839	3.23943854232986	13.5683338055357	2.45861752253657	3.11170298458089	3.98909525197577	0.999474219634387	Distal Intergenic	NTRAS
cluster_1	chr1_212126953_212127650	12.4222831518446	11.090575457719	6.17887674949098	1.73431986355508	11.9995138698597	6.50445683278004	4.29406061661332	1.5109251706601	0.957183466302125	Distal Intergenic	DTL
cluster_1	chr1_212759780_212760713	10.4564862796059	1.16883932548007	1.41400397436217	1.38362089450109	10.8832288092186	1.89694165242286	1.63079802104428	2.42346755236521	0.999877310590659	Intron (ENST00000366978.5/25936, intron 4 of 4)	NSL1
cluster_1	chr1_212908167_212908909	18.2608634739092	2.61605855920387	0.837201188957719	1.06577454333102	17.0181097652974	1.16494553512175	0.574195117724781	1.66896761992874	0.999955705803085	Distal Intergenic	FLVCR1
cluster_1	chr1_212914698_212915699	20.9296250395853	8.16025646614623	7.02786296891447	3.48516146310992	18.3100794289408	3.89416705119445	4.3982676990737	2.80041357808347	0.999226432081725	Distal Intergenic	FLVCR1
cluster_1	chr1_212916544_212917340	28.7213808942045	7.0085242170745	5.06646850699899	3.61592840518961	25.7684224231274	4.35588214175677	3.17622421898531	6.25838876239831	0.999876737387295	Exon (ENST00000632866.1/ENST00000632866.1, exon 1 of 3)	FLVCR1
cluster_1	chr1_212928535_212929443	14.0672602108626	5.92963109215309	5.64563197201116	3.3913344040955	15.2987244812569	3.38153067733366	2.72738731677275	2.47183685759582	0.999516619549968	Distal Intergenic	VASH2
cluster_1	chr1_21334251_21335313	12.3847618077648	6.89010403772791	3.34221986456838	2.6882203105744	11.1900938823035	5.68045186101493	2.95530086996874	13.4409932883996	0.883383114657661	Intron (ENST00000415912.6/1889, intron 1 of 18)	ECE1
cluster_1	chr1_213670086_213670945	19.2388808136499	1.44094467348608	1.84065771804742	1.05310152871068	18.7790374395025	1.4238293076416	1.08107798810963	1.85708918599879	0.999920910969933	Distal Intergenic	NA
cluster_1	chr1_213979649_213980401	19.5430756309371	4.88144008920313	5.91122033013713	3.96877383854383	21.0637775340283	8.68171480511772	6.48003202535977	4.02535294261657	0.999848544334752	Promoter (<=1kb)	PROX1-AS1
cluster_1	chr1_214289559_214290312	16.255495835094	6.47617298088137	3.90996230267987	2.02073742792006	18.3472995407845	4.34165209246402	4.81229597887787	3.48112657637914	0.999953846218508	Intron (ENST00000491455.5/56950, intron 1 of 10)	SMYD2
cluster_1	chr1_214316447_214317088	20.6806768169034	4.72006426983434	1.75858588151154	1.47899809155455	28.3900640979843	6.51618542618513	9.68228787558841	11.194164822873	0.995746376874889	Intron (ENST00000491455.5/56950, intron 3 of 10)	SMYD2
cluster_1	chr1_21436583_21437556	15.5094013237546	5.86579510465313	4.11051598544734	1.45704756353415	17.6624729204915	9.49120600917739	2.66749662629196	3.50295455151239	0.999087211595649	Promoter (2-3kb)	NBPF3
cluster_1	chr1_214404470_214405354	13.3101150626549	3.66730712846166	1.99053955233331	2.0142163673169	12.7781087225591	2.84279601591836	3.43026798813439	3.00972589955376	0.999968316975747	Intron (ENST00000366956.10/5784, intron 5 of 18)	PTPN14
cluster_1	chr1_214446678_214447468	22.2909590180006	9.06090261940497	2.07200428912333	2.11012372637127	24.5609212696473	2.77408016163963	4.00989769124504	8.17181655168041	0.999413588025652	Intron (ENST00000366956.10/5784, intron 3 of 18)	PTPN14
cluster_1	chr1_21508913_21510586	23.2900652849291	15.2512588142815	6.61896982361212	6.5277738199109	26.465520711649	16.4679010050643	11.280088305058	6.01413566971155	0.996227654028227	Promoter (<=1kb)	ALPL
cluster_1	chr1_21607487_21608385	77.2071767593739	36.4375954203851	17.814496663831	13.5634907856818	82.6302734484624	43.3009369883788	31.3970521708879	16.7891616382338	0.999452326560495	Exon (ENST00000374763.6/5909, exon 14 of 23)	RAP1GAP
cluster_1	chr1_216388452_216389042	12.4039495860729	15.4576911300879	4.44825263054435	2.3846612678865	9.94839308998972	3.92832654419081	4.44845027467232	1.08588269233991	0.761326187631864	Intron (ENST00000307340.8/7399, intron 3 of 71)	USH2A
cluster_1	chr1_21814238_21814888	28.621120962262	7.7241481324844	3.50679177151476	2.72718256799364	25.0359307715667	9.87826075990595	3.76239296038845	2.48837923972454	0.999919339979523	Promoter (1-2kb)	LDLRAD2
cluster_1	chr1_21913100_21913660	17.9162830487472	5.26060653009891	1.29876864882526	3.45279676079587	11.6311730605394	3.86206326730939	2.79237952608399	5.81031867738756	0.996258400931499	Intron (ENST00000374695.8/3339, intron 1 of 96)	HSPG2
cluster_1	chr1_21922264_21923051	14.0760774589279	9.17494466231308	0.624458689059954	1.53199951415342	19.5719338168469	7.88023576602021	2.68480959792893	2.45493116756999	0.997495972405372	Intron (ENST00000374695.8/3339, intron 1 of 96)	HSPG2
cluster_1	chr1_21963577_21964368	12.0653151018307	6.60893937703777	2.95680477917326	4.04132876739903	13.366186277841	3.91407651866014	4.42489579133671	4.40729721288162	0.999814864936951	Distal Intergenic	CELA3B
cluster_1	chr1_219834202_219834863	16.3863969022246	0.991028971712974	1.04440075609049	2.99293590165675	23.52992695908	1.65583612256935	0.4551133273452	1.57973533109924	0.999420500957094	Intron (ENST00000484239.5/105372926, intron 4 of 8)	SLC30A10
cluster_1	chr1_2199112_2199773	30.3632090200185	11.9422429983746	6.21047306614009	15.4248021734965	29.9265075029945	14.585170501087	6.33794034619383	12.3368754370121	0.998208730245368	Promoter (<=1kb)	FAAP20
cluster_1	chr1_220338542_220339594	20.3471302197268	1.17421709850557	1.05545162833415	1.3894584782248	21.6055160781917	1.06239778050217	0.840030929143166	2.04441353069326	0.999918799698548	Distal Intergenic	RAB3GAP2
cluster_1	chr1_220810117_220810801	16.615809274261	5.01191139617286	7.03463391778511	4.71630974986761	13.2528392496482	5.67036294179782	4.05490854214807	2.44431214662816	0.997630877347764	Promoter (<=1kb)	MTARC1
cluster_1	chr1_221715249_221716128	23.701096909775	2.85353490848243	4.20010474026525	3.9105003251352	29.5686992984699	3.76648807135904	2.82955456332054	3.36910555552365	0.999794669211474	Intron (ENST00000366899.4/11221, intron 2 of 3)	DUSP10
cluster_1	chr1_222736378_222736923	16.9323697225114	2.36498315506489	3.99338695479382	2.34427774237112	20.5103956039675	3.0083743439977	4.10835127318745	2.29672272435951	0.999729362502039	Promoter (<=1kb)	FAM177B
cluster_1	chr1_223029797_223031355	19.9833069709321	3.6479149319942	2.22141104131755	2.98454221190301	17.0078405731233	2.49792089626602	0.880724579161418	1.64894489214557	0.999842889696078	Distal Intergenic	LOC102724046
cluster_1	chr1_224164473_224165350	14.5905581340018	1.93777644819675	1.47159607402552	1.17417001262854	16.3603733896864	1.23483692830299	1.34442901044983	1.1645029232948	0.999955667233291	Distal Intergenic	DEGS1
cluster_1	chr1_224203279_224204099	13.0322624615639	3.92100237782346	3.81942355391074	2.52972882170355	14.4946770931517	4.9296777160528	2.59496495505453	4.47460534991728	0.999927207599686	Distal Intergenic	LOC101927143
cluster_1	chr1_224213237_224214256	7.55540926316961	3.09846007576874	1.3070980789254	2.13598697568992	11.2758760687827	2.31040672018781	1.85050109619236	4.79058452987124	0.996209740072743	Promoter (<=1kb)	LOC101927143
cluster_1	chr1_224340414_224341387	10.3770635091871	5.12348577414169	2.72371813180291	3.86263288740002	17.6136862632627	5.63668684132332	2.50644502371953	1.98570645489882	0.997358728142092	Distal Intergenic	NVL
cluster_1	chr1_224498053_224499048	22.658930244696	4.24355002210745	5.7751949202189	4.49127520600809	17.9985370524829	6.61803907227633	6.37919476381819	12.5458606280726	0.992041590999869	Intron (ENST00000471578.5/149111, intron 1 of 5)	CNIH3
cluster_1	chr1_224851458_224852383	12.8978749951763	3.40205404253815	3.01699257659475	3.77870543402832	9.81553512189753	3.14765189528033	2.19151927498355	3.68031722528803	0.998826921422252	Intron (ENST00000657178.1/105373108, intron 1 of 3)	LOC105373108
cluster_1	chr1_224880463_224881129	13.1713264207166	7.2368918105245	5.0437773844631	1.38468130512511	15.265848546606	6.45158645348283	4.32855457981508	3.2314943287228	0.999222529124554	Promoter (<=1kb)	LOC105373108
cluster_1	chr1_22556230_22557097	18.7066781445711	9.4013212472078	3.64428982083047	2.80701468575277	21.3717695440989	11.6592911679034	8.81707505871796	4.89247324293964	0.998263132953824	Distal Intergenic	EPHA8
cluster_1	chr1_225677170_225678125	16.7131394645409	6.61014901649512	4.7560987126564	5.88150237914245	15.2368654869225	5.76675124900955	4.45370680599556	3.67019841327005	0.999875973316872	Distal Intergenic	LOC102723834
cluster_1	chr1_225845553_225846276	25.5364227276077	11.4742012803836	3.24086092947415	4.47321402541057	25.266289344922	6.30857679581644	5.7236327400143	4.89046563346986	0.999925630476069	Promoter (<=1kb)	TMEM63A
cluster_1	chr1_225898858_225899962	32.0554421138631	5.37950173603556	2.24575325277907	1.60703775902336	21.3992685060954	3.77696577066304	2.37408992350705	1.17744225882717	0.999191321476062	Intron (ENST00000432920.2/10637, intron 5 of 7)	LEFTY1
cluster_1	chr1_225911095_225911832	14.9676030973005	3.16305686929271	1.75564355663689	2.68765084761215	12.5752216926368	3.2910289709273	3.36180748817548	2.34502656080525	0.999862051829449	Promoter (<=1kb)	LEFTY1
cluster_1	chr1_22593018_22593827	17.5986496952392	3.54638748947064	1.80349521418692	2.08605140899392	15.2139931718029	2.28257658409929	1.11522070874473	2.42533207607792	0.999906419932016	Exon (ENST00000166244.8/2046, exon 6 of 17)	EPHA8
cluster_1	chr1_225939169_225940071	16.5566924876162	5.33921999655994	2.36583310563	2.23325979419426	18.1129079710683	7.44260250601447	2.57326181546743	2.93648555771263	0.999952168440728	Promoter (<=1kb)	LEFTY2
cluster_1	chr1_226196825_226197418	19.8591346975978	5.38459339656853	4.26147427695379	5.76457675671061	13.6224618674013	7.83561225357998	4.72711919183728	5.25209040767609	0.997582765270753	Distal Intergenic	ACBD3
cluster_1	chr1_226223147_226224338	19.4730465771179	10.7845244162268	7.48374769892217	4.79719144085404	16.826853081765	12.0502748886204	7.77902446656236	2.80915729110974	0.992796762380575	Promoter (<=1kb)	MIXL1
cluster_1	chr1_226404800_226405718	31.4439711378039	2.86719372726796	0.752131673374512	2.13656365034939	31.6051792453362	2.53703687636357	0.993643905843612	2.36177286055772	0.999971309291666	Promoter (2-3kb)	PARP1
cluster_1	chr1_22662308_22662895	19.3317997660599	4.58656298762757	4.93850767288175	3.43189624933143	21.6156399076966	8.06545889767636	6.61309603231399	2.56169686896832	0.999803182266979	Promoter (2-3kb)	C1QB
cluster_1	chr1_227356405_227357107	19.6212260097754	3.20705872147419	2.10625980105156	2.16376660033792	17.4916270764475	1.92372558460759	1.09277209718869	2.79022136449846	0.999885335291458	Distal Intergenic	LINC01641
cluster_1	chr1_227793644_227794338	16.1095296108399	7.32834759397295	4.75952516310795	2.2816863279223	16.4767421812598	10.1654939137368	5.79510840436495	5.76696337311037	0.998815478643781	Distal Intergenic	LOC105373289
cluster_1	chr1_22780655_22781362	22.6400707748352	16.2178591277194	5.05872091727192	4.33916239629706	25.4816856532413	9.93435961341144	4.56720005095063	3.66359211292206	0.997494758527317	Intron (ENST00000544305.5/2048, intron 1 of 6)	EPHB2
cluster_1	chr1_227886708_227888445	12.8859513486613	9.00326936563395	6.88096137191444	4.71843947037779	11.6095479365812	12.8688839238627	8.75615446625715	3.83737676384939	0.868848372700451	Distal Intergenic	MIR5008
cluster_1	chr1_2278872_2279943	33.1214171882496	8.20945998855654	6.3764493806845	11.8792728941314	34.4719923056262	16.8087551650851	11.8146578429758	15.3393184900684	0.998765845293527	Intron (ENST00000378536.5/6497, intron 1 of 6)	SKI
cluster_1	chr1_228004297_228005085	14.4721982771846	4.9532328620477	2.75050822807501	3.10260798704492	15.2507895956797	7.45531568357327	6.2224062406992	3.9251266608463	0.999692298181814	Promoter (1-2kb)	WNT3A
cluster_1	chr1_229093547_229094327	21.8912883896563	5.85711217054021	1.18005871757037	0.647721329400979	28.1024268717002	2.62538193108591	0.822605104317528	2.16915528351355	0.999945048419827	Promoter (<=1kb)	LINC02814
cluster_1	chr1_231806385_231807277	15.0128607223033	4.48902022211348	2.54257689669646	3.25082582253511	13.4858361073334	5.48356187942878	3.39285179651515	3.80943811816821	0.999963599488183	Intron (ENST00000646525.1/100303453, intron 11 of 11)	DISC1
cluster_1	chr1_23263019_23264127	13.9876495253626	21.3368880660592	5.43711203729559	1.47213344096355	21.1945304468392	6.27481693866434	2.11753379520594	2.26077753603874	0.88464179717434	Distal Intergenic	LINC01355
cluster_1	chr1_233289518_233290225	20.3027631610856	1.03734996931421	1.57592850331675	1.22220012061612	20.0392501890811	2.66647786071161	3.84331417451618	4.10808087126097	0.999746348565298	Intron (ENST00000258229.14/80003, intron 1 of 33)	PCNX2
cluster_1	chr1_233326869_233328902	27.4184396244466	11.5051394738727	8.55495473786768	10.0132086819756	26.1535737501172	11.3215648090811	11.4423579629987	10.497757173618	0.999970163955724	Promoter (<=1kb)	MAP3K21
cluster_1	chr1_23357417_23358070	12.8481015693483	3.98978069924373	1.85136887894739	2.62734605181687	20.1615986841959	2.75789251327628	1.11605488458368	1.61729368454109	0.999307086493629	Distal Intergenic	ZNF436
cluster_1	chr1_233730630_233731522	11.972666119784	1.35680211192496	0.976036992286962	1.89684149411441	16.8454725341641	1.75167548438248	0.741467929694688	1.49424826593371	0.999667140057548	Exon (ENST00000651271.1/ENST00000651271.1, exon 3 of 3)	KCNK1
cluster_1	chr1_23394719_23395654	13.6969737833417	12.1052614355316	2.87340849950144	1.71578129781163	15.1692635010968	3.13447518044012	2.33212001888129	1.46122671483063	0.986810858693349	Intron (ENST00000450454.7/6920, intron 7 of 10)	TCEA3
cluster_1	chr1_23436421_23437385	33.7914670847166	3.85786633056042	1.15409159140542	1.67703419956837	35.3391097089399	5.6304724530342	5.00067761010934	4.34828570681466	0.999980018909874	Promoter (<=1kb)	ASAP3
cluster_1	chr1_235199382_235200274	10.7250894522954	3.95520870975104	2.62880219722238	1.71718250758973	10.5677777681117	4.63132965383086	3.67048782956599	3.26020425847718	0.99995135579649	Intron (ENST00000366603.6/51742, intron 17 of 23)	ARID4B
cluster_1	chr1_235357414_235358215	7.34608657976027	6.36680068998317	1.89652971645109	1.34391455643388	9.68392468357559	6.72741072825645	4.45146143686993	1.97629852209133	0.965170220431679	Intron (ENST00000643418.1/6905, intron 1 of 7)	TBCE
cluster_1	chr1_23539573_23540371	19.3192486135076	10.5741141993121	5.72132463292538	10.1802625310607	24.7660198148018	10.3724770711667	7.74430648600939	8.34950761962453	0.999357796525262	Distal Intergenic	E2F2
cluster_1	chr1_23598159_23599064	48.3285675641963	13.9106107952498	3.86125896893354	3.67751505324843	38.8447560104013	10.6123132306692	10.0635358363508	3.62363133484092	0.999795201172537	Intron (ENST00000477916.5/259283, intron 2 of 6)	LOC107984928
cluster_1	chr1_23619420_23620177	19.2091405645009	6.49697117038796	1.86943086646283	3.02527386190647	17.1087300172001	7.4185621721886	4.77292741118657	6.50940393405873	0.999719100705355	Intron (ENST00000477916.5/259283, intron 2 of 6)	MDS2
cluster_1	chr1_23637294_23638339	13.7883696027569	6.86206416016413	2.2660830425199	3.34679325312216	11.4965767465765	11.2277081940525	4.47813695920346	4.60052837380052	0.978807491876584	Intron (ENST00000477916.5/259283, intron 5 of 6)	MDS2
cluster_1	chr1_236502993_236503742	20.264075442409	6.13541677598925	5.34770392801175	5.09655307855238	21.8715941999295	7.70841021233459	6.85450951488502	8.69090385550779	0.999853353541385	Downstream (<=300bp)	LGALS8
cluster_1	chr1_237031713_237032552	19.9115625808718	3.17713864326911	2.52044095749101	2.55612572025151	13.8068628663199	3.9981163897099	2.71902152126367	2.10980305010765	0.999160952309418	Distal Intergenic	RYR2
cluster_1	chr1_239814235_239814902	13.2685323054175	3.19449326694515	2.17842199117192	3.48826940964256	14.3552181862133	2.35271794456264	2.75749219401801	12.4720173496199	0.957883771039625	Intron (ENST00000468573.5/1131, intron 6 of 8)	CHRM3
cluster_1	chr1_240492680_240493544	19.9739722710387	6.84733245435986	4.46599882911081	3.02681357368172	22.6634633699271	4.37231567981734	3.25145876339101	4.07698558977114	0.999971413223209	5' UTR	FMN2
cluster_1	chr1_24150270_24151866	27.5948999695616	9.46348227159704	2.77008502802571	3.99017728240731	28.6968679063048	10.0365712584659	8.1075413270628	4.96856524732951	0.999974390512168	Distal Intergenic	IL22RA1
cluster_1	chr1_24186924_24188042	18.5972442633745	6.55079019294512	3.58355992295765	7.02771150433637	19.316130530894	9.48091068072571	9.53213511100776	8.09943829259997	0.998862109943193	Promoter (<=1kb)	IFNLR1
cluster_1	chr1_24286453_24287273	12.2751995111515	9.69235247303358	1.79114835857867	0.943621183086008	20.0403736011201	5.25307143485698	3.09673908515501	1.97838408620039	0.995285773170952	Intron (ENST00000690803.1/57822, intron 2 of 15)	GRHL3
cluster_1	chr1_24308219_24309030	18.5655729494529	5.21716459436676	1.56888996281652	1.57540746797754	18.172553117333	3.94859635598943	2.137146936924	1.74812829689779	0.999996773572959	Exon (ENST00000437965.1/105376871, exon 4 of 5)	GRHL3
cluster_1	chr1_24319121_24319762	20.2490471972414	14.5815930583845	2.32993894584782	2.52472784708341	16.3217215091702	9.8103757464666	3.99505409262507	6.12991101418622	0.985423635262067	Promoter (<=1kb)	GRHL3
cluster_1	chr1_24463601_24464333	14.0134265536504	3.1725603138212	1.36294143427083	3.21315346831002	17.3318301057801	5.99026332942139	3.12696880996376	2.59488518248355	0.999850488511739	3' UTR	NIPAL3
cluster_1	chr1_244815170_244816253	16.254139651029	1.31672850214335	1.31749422602194	2.07880062587867	13.5106377200532	1.30508092276148	0.90375752682679	1.87191149640361	0.999668257152912	Distal Intergenic	COX20
cluster_1	chr1_246788809_246789846	10.849819254565	3.05125635841978	3.45633115779458	1.81522679978703	11.5324108904881	5.78041010076142	4.36116522414872	4.63175895174768	0.999087978095326	Promoter (<=1kb)	LINC01341
cluster_1	chr1_247118767_247119375	20.6655971103129	2.6944228246689	2.7143719515559	0.70981887866616	27.5504402534195	3.95284780938409	3.30068261212329	3.22767174417443	0.999833125217259	Distal Intergenic	LINC02897
cluster_1	chr1_24724507_24725894	28.648914848875	16.4535278811861	3.7928205497232	3.61971793529551	25.1817692707377	12.707317637058	5.69763457689722	8.46651068002948	0.997936798966339	Distal Intergenic	CLIC4
cluster_1	chr1_247390042_247390606	26.6342117739177	6.42561717254808	9.59796230445698	8.72008037401905	21.0700131850961	6.8011052972225	5.78638176933682	5.71524399316164	0.997969126956549	Promoter (<=1kb)	LOC107985375
cluster_1	chr1_24742295_24742811	25.8545371797684	3.26952970917959	1.06442951793648	1.07524845978552	18.6169188254315	3.59564467295476	1.73357467977717	16.7615865027671	0.975679571052968	Promoter (2-3kb)	CLIC4
cluster_1	chr1_24909467_24909994	22.6358700807389	3.80294081005699	1.11473819990688	1.35853894972824	21.6613019297412	4.15442813356848	2.43691350245624	2.15721066465695	0.999994917476417	Intron (ENST00000308873.11/864, intron 3 of 4)	MIR6731
cluster_1	chr1_24926576_24927070	15.6743366970323	7.09934524766536	2.78741997841416	2.37650495121136	15.9670652565768	8.02315272413753	4.25671174657142	2.45732437644324	0.999672425629357	Promoter (1-2kb)	RUNX3
cluster_1	chr1_24929975_24930703	16.9362300396932	10.3240831616016	3.4718603288851	4.57652105225159	17.6950074085951	10.1235399610727	4.96276297272659	11.5256965471175	0.991636627014538	Promoter (<=1kb)	RUNX3
cluster_1	chr1_24970108_24970780	10.8775085387755	6.67072152474585	1.21623900854365	2.61356373327358	12.4559587480515	5.28936155841673	2.42357757757325	2.70961605427686	0.999109888654139	Exon (ENST00000568143.1/ENST00000568143.1, exon 1 of 1)	RUNX3
cluster_1	chr1_25506540_25507360	12.1647028870112	8.03020448882071	1.99710083052652	2.21193350269812	16.7962167754168	6.41306873059364	3.38433648881329	3.46915934157412	0.998525273243176	Distal Intergenic	LDLRAP1
cluster_1	chr1_25517466_25518370	14.3817657938494	1.61501604024632	1.25267306846551	1.44236427290304	13.3585014254226	1.95172511470295	1.5757506327162	2.31435031534117	0.999920820191248	Distal Intergenic	LDLRAP1
cluster_1	chr1_25586103_25586591	17.9569123063499	12.843914279342	2.99389088621024	2.91017065480535	17.9898894173985	7.05242675198876	2.77994863415193	3.49145254772398	0.996294029933691	Intron (ENST00000412797.1/26119, intron 1 of 1)	LDLRAP1
cluster_1	chr1_25587873_25588703	10.2997756778574	3.65927171037041	0.845379409705814	1.28086121800404	12.7882039691771	6.23660967881437	1.9356217268179	1.56256665629647	0.999226250515619	Intron (ENST00000412797.1/26119, intron 1 of 1)	LDLRAP1
cluster_1	chr1_25780178_25781094	12.2734260042292	3.67436961519287	1.80146415672339	2.12019181700514	19.7732712298079	3.29169794156207	1.56174544172537	4.22654940961635	0.998832114917626	Promoter (<=1kb)	MAN1C1
cluster_1	chr1_26009772_26010552	8.27895778671713	1.91833623151914	1.28197252195259	3.72173002112628	9.52030277895575	4.0220944276115	2.92003360019023	3.19766821414013	0.998464523144301	Distal Intergenic	EXTL1
cluster_1	chr1_26094257_26095344	12.5198448721012	4.8427035902444	1.76181513118204	3.08553754843865	11.5109393297874	5.53431213929148	2.76195190569817	4.64230880378885	0.999711332265409	Distal Intergenic	PDIK1L
cluster_1	chr1_26154711_26155495	10.2760926365687	10.2641684974088	2.16322350474007	3.25699872270847	16.2698290099969	13.0865139423465	8.69537826612246	2.66192846626921	0.876246831959212	Distal Intergenic	FAM110D
cluster_1	chr1_26164229_26165014	21.7291045886982	20.9131365850292	5.34650698855275	6.5836225294003	22.5299602322038	21.6827721273598	12.8389805162511	4.9030990903149	0.871945025808177	Exon (ENST00000634842.2/110806296, exon 4 of 4)	C1orf232
cluster_1	chr1_26176961_26177894	23.8509340574122	7.16930323659006	1.44252958391994	1.18899360278241	24.614968487906	3.71215621172234	1.55520443357999	1.39565390216653	0.999990557148171	Promoter (<=1kb)	CNKSR1
cluster_1	chr1_26190085_26191010	16.6937920975822	5.79177338920417	1.95189083835681	2.7076948376889	20.9486791383185	6.7959855858878	2.43366908920509	1.38484979311065	0.9999021306613	Promoter (<=1kb)	CATSPER4
cluster_1	chr1_26200673_26201698	20.3374950519138	3.64738141467667	2.50280550797917	2.6828041638713	20.1249353161115	6.62185421251713	2.73982671894294	1.35097838809598	0.999969903667492	3' UTR	ZPLD2P
cluster_1	chr1_26224980_26225966	23.8678463184084	16.1926215044429	6.31530291693927	8.61826924264536	22.5492742942776	12.9599815038214	10.9879915280485	6.19041924976527	0.996774526305932	Promoter (<=1kb)	ZPLD2P
cluster_1	chr1_26281907_26282646	23.9590379403442	18.0780901069763	6.52432803854353	7.47844857497233	24.5083305281333	18.7616135281252	12.4478383213283	8.2149160847567	0.984675639839307	Promoter (1-2kb)	SH3BGRL3
cluster_1	chr1_26335958_26337157	37.9980476864018	18.8415216093352	4.42801092830918	7.85364432615673	31.8087315531588	15.8479483028608	13.2540109835421	8.89178605595871	0.998804464780518	Promoter (<=1kb)	CRYBG2
cluster_1	chr1_26359869_26360708	16.7639745058433	7.7148889756067	1.69644853007211	1.69564718633324	19.179476861451	12.022013861186	5.66758609827419	3.33500212028997	0.996423322215402	Promoter (<=1kb)	CRYBG2
cluster_1	chr1_26409098_26411623	21.4943050188461	24.5219862500198	8.45878806725073	4.02174210535818	24.073179657517	27.5078408953931	17.8183660702279	3.64829447871483	0.618040351666962	Promoter (<=1kb)	LIN28A
cluster_1	chr1_26411741_26412414	20.1916816088809	19.535583352949	7.17583583064492	3.29293686003691	19.7378998848982	15.5663855177896	8.86227218576614	2.42702046122083	0.915111460696949	Promoter (<=1kb)	LIN28A
cluster_1	chr1_26412528_26412811	33.9827235798352	18.0193599770351	2.64501667337033	2.27479049257875	33.2869144613127	16.176015814932	6.46509646184028	3.18441849198768	0.998591334260056	Promoter (1-2kb)	LIN28A
cluster_1	chr1_26418417_26419494	39.3549486715455	15.1379380508331	3.42281535249542	2.69994651524993	39.0865691974119	19.8815780287496	7.76631012208346	1.71069577041423	0.999291774366389	Intron (ENST00000254231.4/79727, intron 2 of 4)	LIN28A
cluster_1	chr1_26530936_26531839	20.0180180143618	5.80618922295405	2.67360487621802	5.84053938038047	29.3621232210561	12.3648713663431	9.42489171523585	16.2513725957271	0.984298011976665	Promoter (<=1kb)	RPS6KA1
cluster_1	chr1_26541624_26542353	13.5210640360964	4.41503939083334	3.68365990911945	4.85418217318032	13.8929853000851	5.94195642761714	3.43270186009563	3.76397880504753	0.999939844768299	Promoter (<=1kb)	RPS6KA1
cluster_1	chr1_26743972_26744524	21.611395571714	2.52738321410869	2.63384482374685	4.32165190782539	11.6942621722534	2.17929486506296	2.35291857045959	3.23295668310913	0.992234451268282	Intron (ENST00000430799.7/8289, intron 4 of 19)	ARID1A
cluster_1	chr1_26862744_26863268	39.068864807118	4.8435440505816	1.78031897660883	2.97956826087411	31.4989633830165	4.62377402710561	2.13403691821156	2.71477574254447	0.999868698519229	Promoter (<=1kb)	SFN
cluster_1	chr1_26959684_26960954	23.4620605502771	8.4591853945104	2.16186057243245	3.85940111970609	26.8213055486092	6.99730698325844	3.56883288282806	4.34948899924748	0.9999885612222	Promoter (<=1kb)	KDF1
cluster_1	chr1_26997637_26998211	37.3933887554944	8.54345426263456	7.17840055715606	8.89402087107734	33.2256001446807	16.7542341258342	13.2352103588615	10.6226466759408	0.999492618215586	Intron (ENST00000522111.3/388610, intron 1 of 1)	TRNP1
cluster_1	chr1_26999387_26999903	54.4121467278214	6.9558230721841	2.81232017011914	2.44918249806132	48.5033885637624	11.3847996319329	6.7506532995939	6.42288773315277	0.999963650153726	3' UTR	TRNP1
cluster_1	chr1_27007114_27007748	34.3970699103118	2.84120312365672	0.81928368483451	2.72319514171383	27.0049131530026	2.55185657238092	1.10010733512316	1.25192842026062	0.99976185363836	Intron (ENST00000289166.6/115572, intron 1 of 1)	TENT5B
cluster_1	chr1_27008149_27008567	33.6496483180857	7.3514131625983	1.76440646289468	3.32290080424699	30.0121011653352	4.60178628891115	1.80119387829819	4.4493057367389	0.99995596723898	Intron (ENST00000289166.6/115572, intron 1 of 1)	TENT5B
cluster_1	chr1_27027017_27027531	21.5046685716776	5.41519977234233	2.78205043495965	2.13723060074734	19.8973375905548	10.7507368783102	3.71120202388679	8.44980535631083	0.99867194336045	Distal Intergenic	TENT5B
cluster_1	chr1_27044524_27045212	19.7726891951051	7.92066749644066	4.62348934913134	6.22879506356923	18.7164908606981	8.06816579247105	5.43234630142992	6.04405390381842	0.999981859679711	Distal Intergenic	TENT5B
cluster_1	chr1_27049548_27050122	23.8089987331038	2.18630459268703	1.27096481109535	3.29381881063905	19.7789986620483	2.58865943036992	0.587412260452421	1.74430566091389	0.99976468026536	Distal Intergenic	TENT5B
cluster_1	chr1_27057442_27058614	15.2198912262437	6.26791783546857	2.55196183924259	8.14876506829141	11.7478628620834	5.4147050790316	3.40722262244368	4.60846351184727	0.992624074029467	Distal Intergenic	SLC9A1
cluster_1	chr1_27306801_27308106	14.760637441547	11.2855346300055	4.89099802924429	8.59507871734774	23.3493949649692	9.80681689436246	6.72985370257474	2.95565631070176	0.990920979557726	Promoter (1-2kb)	WDTC1
cluster_1	chr1_27350569_27351854	41.1456067086767	22.3597607975346	7.41366095801476	4.19578516571973	42.495489263836	29.601605680212	17.4238562676382	6.42107498721594	0.992092157356074	Promoter (<=1kb)	SYTL1
cluster_1	chr1_27357420_27357933	28.0130939152348	18.7633793819851	6.05803363193815	3.66567731473405	23.4625546247406	10.7875698099531	6.91519673999744	6.08127168559671	0.994672817202516	Promoter (<=1kb)	MAP3K6
cluster_1	chr1_27382874_27383705	22.0203665487765	5.55611248964974	2.87089325537931	3.69061123912326	28.5399477651496	7.29308696326619	5.14855847177734	5.98369301672763	0.999888858709038	Promoter (<=1kb)	CD164L2
cluster_1	chr1_27614760_27616058	14.3442478930489	4.77509939049762	1.53966209510307	2.43200629028287	13.1967442971828	5.92101259084247	3.02192792461119	1.70089340765112	0.999884484304627	Exon (ENST00000374005.8/2268, exon 8 of 13)	FGR
cluster_1	chr1_27643593_27644433	14.4286010360453	4.69170475113867	2.40318681701338	1.96811303062213	11.8961821518974	3.56054755061921	1.55209451968404	0.838147120293743	0.999772463290147	Distal Intergenic	FGR
cluster_1	chr1_27656048_27656572	20.6923393472116	4.74212948545974	1.08641464674885	1.64645526790343	23.7375818264842	5.24248822059582	1.96160510392412	2.00762104240655	0.999996868996406	Distal Intergenic	LINC02574
cluster_1	chr1_27872177_27873384	14.4348436188314	14.2877753881135	5.58054689572123	8.49783341739542	18.1691154323818	12.3363493239429	8.31037770908162	5.77194457508984	0.967849977649797	Promoter (<=1kb)	THEMIS2
cluster_1	chr1_27934682_27935413	34.8182176824463	4.43710000091735	2.56868584059065	3.30318139201141	32.3996526995543	7.80587383924853	5.30619491846197	4.56318450106122	0.999966488489675	Promoter (<=1kb)	SMPDL3B
cluster_1	chr1_27937130_27937773	13.116853230183	4.3123879703941	1.11111098034093	2.57594214835576	23.8715861900119	2.16003827509287	2.49061727341358	3.24041627428908	0.99771626096281	Promoter (2-3kb)	SMPDL3B
cluster_1	chr1_27959338_27960534	40.131874107648	16.620335762072	5.09555200299721	2.2365688643125	39.3618816222113	19.9381025102228	15.9760955023437	13.3153709003515	0.998645047485141	Promoter (<=1kb)	XKR8
cluster_1	chr1_28104797_28105678	25.3360269734655	8.33638316315173	3.21305255053906	4.72981368542171	20.2102021744944	7.12326110900992	5.32081335878189	3.45568202731941	0.999776826035821	Distal Intergenic	EYA3
cluster_1	chr1_28510656_28511893	33.284089695391	3.52732940676099	1.6268227692566	1.99013997822856	23.4644597202643	3.22062630412039	2.18014321240877	3.35980946546528	0.999386445896743	Promoter (<=1kb)	RCC1
cluster_1	chr1_28784841_28785829	10.9127581457724	8.87272384324402	2.97272454948252	6.10572055306809	9.87944267520876	6.10784747964749	4.39071453253797	2.28781997092882	0.971516402308505	Distal Intergenic	OPRD1
cluster_1	chr1_28811959_28812858	13.2534801561172	5.30384812978909	2.65790820473979	3.03186453393618	13.9928900554056	4.61561701439415	2.81127373169393	5.93951919791448	0.999774429599178	Promoter (<=1kb)	OPRD1
cluster_1	chr1_28882027_28882509	28.2630684709961	10.1238189314631	4.37472691178568	10.8448813180223	27.0551440172068	10.7450531442183	10.203393869195	10.5691088940846	0.999628558472704	Distal Intergenic	EPB41
cluster_1	chr1_29121216_29121786	29.0650045787678	8.13237910509447	5.80033888315643	3.59455945480204	28.3454825399835	9.56958703631052	6.20302586278757	5.73506601550637	0.999993250558745	Promoter (<=1kb)	TMEM200B
cluster_1	chr1_29282727_29283883	60.9201791968326	33.803162294726	8.55304151869757	4.07489631885489	61.1608998718953	42.6486659356743	31.4874279998638	8.01248233007856	0.985764482506165	Promoter (<=1kb)	PTPRU
cluster_1	chr1_29324607_29325506	60.3166957422662	15.1107825383721	2.11008655870736	1.41904753943042	63.5414554379703	12.2089666197418	6.79430356027097	3.46890562369512	0.999998606890955	Promoter (1-2kb)	PTPRU
cluster_1	chr1_30685055_30686249	37.6875338773367	12.2291464371193	4.90225704220691	5.93964443809625	42.9612719140069	18.014513109088	11.7823913429511	7.72765097850453	0.999890078256906	Distal Intergenic	MATN1
cluster_1	chr1_30782317_30783296	14.9491134184213	6.95268691781722	5.01813309758257	6.78281537898844	17.1390548664311	7.31326537691817	5.25700613599164	5.15860164959	0.999925036844882	Distal Intergenic	LAPTM5
cluster_1	chr1_30929323_30930254	18.3978640938906	5.35136048719385	2.23478269988512	3.038018223842	14.9494840895574	6.28620613099919	3.09462528113197	3.3453164465649	0.999838011761273	Distal Intergenic	PUM1
cluster_1	chr1_31394495_31395341	17.7326157252387	12.3226061551039	4.39001874114328	8.49211052707748	21.7472978724557	12.4905930162882	8.44165919283755	9.73422682297382	0.996765909786124	Distal Intergenic	SERINC2
cluster_1	chr1_31575958_31576819	18.9599948786289	6.53096445905791	1.44178776944735	2.2633937133489	20.7525041621521	5.57075541585616	2.39025694831064	9.49870129332744	0.998783723133577	Promoter (<=1kb)	TINAGL1
cluster_1	chr1_31703740_31705057	16.4731347270113	3.90449229236009	3.20989485045886	3.71451640490192	15.1208082010234	6.65112631530477	2.76877640042758	28.2036419817851	0.620758358079115	Promoter (<=1kb)	COL16A1
cluster_1	chr1_31705162_31705641	17.6499289506157	6.52086273656769	2.52869507462315	3.9335328793821	18.2701505668386	10.5899553025763	3.27862152351869	30.8252219906567	0.643285120232761	Promoter (<=1kb)	COL16A1
cluster_1	chr1_31815636_31816367	20.5268601059022	4.46689837569153	1.17888834656086	2.05855334705145	20.7635614629757	6.1799616596499	3.13857500822434	3.66801867670679	0.999992182626764	Promoter (<=1kb)	SPOCD1
cluster_1	chr1_31977460_31978239	9.97885683611189	3.19410803163599	1.13761223846015	2.41463957128463	11.9135236488235	7.31951565852882	2.25767753516681	7.24643327468194	0.98425710329435	Intron (ENST00000641788.1/ENST00000641788.1, intron 1 of 1)	PTP4A2
cluster_1	chr1_32248136_32248949	36.4813545671989	8.67431450591875	1.94415959369155	2.62643646984303	34.7263921361124	9.1185715433512	4.88266495028485	7.28883486677605	0.999985063514792	Promoter (<=1kb)	FAM167B
cluster_1	chr1_32273625_32274506	25.0593800804887	4.23964643489993	1.97840699091423	1.32377776281312	23.7497549049919	3.78341316841926	2.55685404416164	5.30460955837601	0.999945628973155	Promoter (<=1kb)	LCK
cluster_1	chr1_32361303_32362787	15.8274918205408	11.1246255921299	5.36088345503662	4.83215069987673	16.4344405044983	9.94492261464798	7.45246478013886	6.67618040543224	0.998196995510996	Promoter (<=1kb)	FAM229A
cluster_1	chr1_32437788_32438882	17.8278299964568	1.84809117251843	0.494749189904771	1.52643589398046	20.4976119036933	1.76231194709063	0.506261339392624	1.39142772533468	0.999965758908246	Distal Intergenic	ZBTB8A
cluster_1	chr1_32447581_32448792	17.5771092153952	9.11478026911265	4.87802839346887	4.55834127054392	14.663928250523	5.53854579302384	5.19455265747843	7.56680467806921	0.998759190620216	Distal Intergenic	ZBTB8A
cluster_1	chr1_32712138_32712619	19.5058480422314	9.72081283175323	2.59010467152615	5.87937260339556	21.5527438724323	8.23195476527721	7.02689230597227	2.41587286357057	0.999533461553259	Distal Intergenic	SYNC
cluster_1	chr1_32716346_32717417	26.0119188717367	14.8461246284522	3.76796158848713	6.58501107308253	30.6412712796751	9.88526985434585	8.15360187478808	6.67851471921921	0.999716098612517	Distal Intergenic	SYNC
cluster_1	chr1_32724547_32725603	10.3512300550425	5.26954587194308	1.64729919371846	2.0585015120226	10.6480046715717	3.63797523420889	2.22851867455896	10.264847155539	0.946318226379215	Exon (ENST00000421619.1/ENST00000421619.1, exon 1 of 2)	KIAA1522
cluster_1	chr1_32760787_32761288	27.9716798895907	2.60863740767622	1.73333660457761	2.68509259367736	20.2818635047998	3.2960614760246	1.96495292876823	2.6670222678226	0.999440271473726	Intron (ENST00000401073.7/57648, intron 1 of 6)	KIAA1522
cluster_1	chr1_32765266_32766266	16.1657756237937	7.69647836506988	3.92543085337747	7.10060508595917	17.1844786038226	10.6860887848061	7.19864160258097	5.51822588198741	0.998951784390038	Promoter (<=1kb)	KIAA1522
cluster_1	chr1_32980510_32981610	8.33537598176311	2.44715007236756	0.517522327873545	1.10924052948005	6.5759061359884	2.13061129732305	0.815504018297693	6.56481903330213	0.962200104335556	Distal Intergenic	RNF19B
cluster_1	chr1_32992250_32992835	14.4296284755217	5.29603377207847	1.19398316971275	1.47059671491863	15.2575188882026	10.4392554758975	3.30965194751106	14.5210668951089	0.925027916735567	Intron (ENST00000427524.1/ENST00000427524.1, intron 1 of 1)	RNF19B
cluster_1	chr1_33055103_33056039	6.55788726417611	2.62257658904217	2.07059261251388	2.97591829467245	7.55480900510689	5.02486238274646	2.87330190096912	3.4252341473916	0.996691341955615	Intron (ENST00000548559.1/204, intron 2 of 4)	AK2
cluster_1	chr1_33152721_33153521	26.1550486872125	6.20286744492751	4.36053380638479	3.76869346174661	26.9325860130995	5.05553615371307	4.90977204571659	1.8916936840712	0.999978774194246	Intron (ENST00000291416.10/55223, intron 4 of 4)	TRIM62
cluster_1	chr1_33633080_33633842	10.9145107873908	3.17990391111313	2.77100693775757	5.41971931576189	11.1268873871568	3.67203088572642	4.30533226665646	4.35231615328223	0.998515347313624	Exon (ENST00000373381.9/114784, exon 32 of 71)	CSMD2
cluster_1	chr1_34166188_34166602	20.4253537543839	8.77305415627475	3.89683594209894	5.14311940203699	18.6530795939196	9.65386665504556	7.99138265742736	1.57622828654415	0.998642994301304	Promoter (<=1kb)	C1orf94
cluster_1	chr1_34166706_34167398	19.0674899700248	8.44527614849472	5.32457962135649	5.01298405103231	17.7097048593513	5.10589452401036	4.7471551574977	2.24367272343162	0.999671104838973	Promoter (<=1kb)	C1orf94
cluster_1	chr1_34884896_34886359	18.492442903302	8.08881474651237	4.21017488832912	5.37241415909861	20.0128089449175	6.96019043231368	5.94921211712644	3.07914422177486	0.999953798422787	Exon (ENST00000235180.4/58512, exon 4 of 10)	DLGAP3
cluster_1	chr1_35210133_35211198	12.9557780716934	6.05257061260963	2.85311206415853	4.48786408219268	11.940644360927	8.26236482635971	6.9335486615062	1.85730132639403	0.992238078033219	Distal Intergenic	SFPQ
cluster_1	chr1_35390204_35391503	16.2030737629612	1.607037988972	0.39666322228225	0.828557080322009	15.4690476258989	1.57244079783902	0.825999374836557	1.4953129742231	0.999972712283386	Promoter (1-2kb)	ZMYM4
cluster_1	chr1_35554898_35555457	30.5864813934347	0.801264346866676	2.25705959020295	6.0560239428586	24.4649993760922	2.76590766171251	2.73015413426905	2.88023337407247	0.999010037756164	Promoter (<=1kb)	KIAA0319L
cluster_1	chr1_35577447_35577988	18.7222127700712	6.67020871531805	2.3801539717127	3.52729326693537	17.7727669185391	10.4641520694175	4.48473236197338	1.71232765030996	0.998997589152225	Promoter (<=1kb)	TFAP2E-AS1
cluster_1	chr1_36096993_36097645	14.3425176784624	4.643703671515	2.87906292723114	2.79082374293675	14.838557991646	3.94891665743288	2.65218039543097	3.72823376451396	0.999993452400239	Promoter (2-3kb)	COL8A2
cluster_1	chr1_36160792_36161680	17.3044934895787	10.6204635233317	4.88050496179816	6.3461171464943	23.4920620542805	11.1940101347547	9.73134699179669	11.863865573101	0.995523338689977	Intron (ENST00000429533.6/55700, intron 1 of 5)	MAP7D1
cluster_1	chr1_36176164_36176768	21.1561172255189	3.25841834378119	1.78188464264826	3.60174052737624	25.9146487181155	4.20388317067201	3.70115891903401	2.44789939566419	0.999924783939946	Promoter (<=1kb)	MAP7D1
cluster_1	chr1_36178586_36179405	27.9490384866515	4.78323718699123	1.98939637996782	1.77240539217153	29.939869936007	8.17684218462303	7.49937576117784	4.21459427203868	0.999945087768982	Promoter (<=1kb)	MAP7D1
cluster_1	chr1_36187665_36188642	22.8059446673581	8.97362946563681	2.22855552066843	6.79358593429488	26.0859491868492	14.042446325569	8.03057909590735	18.2998836233127	0.982470800450687	Distal Intergenic	MAP7D1
cluster_1	chr1_36299697_36300354	13.2171012830965	3.6849386229704	1.20048579726014	4.97096212262627	11.303077765538	2.42134365518171	2.95642402014365	4.31967382176748	0.99810343524451	Intron (ENST00000469141.6/9967, intron 10 of 12)	SH3D21
cluster_1	chr1_36576032_36576534	9.80017620350951	6.3384366740826	3.1664512419358	9.43150888955644	16.7339111598905	6.2432656432974	6.11991176968765	3.98375794128626	0.968981562091708	Distal Intergenic	CSF3R
cluster_1	chr1_3674192_3675449	13.5978053423259	3.89934875789454	2.37106285078534	3.70896887596379	12.1206575454696	3.31848631897721	2.48491232511334	3.51777523225978	0.999868131427539	Intron (ENST00000378295.9/7161, intron 1 of 13)	TP73-AS3
cluster_1	chr1_36771120_36772231	12.6238697366795	9.45805231293044	3.22731936873025	3.47970963615012	20.3399257926113	6.2977035117898	3.24096913960718	3.52441676491113	0.996543613436431	Intron (ENST00000664693.1/ENST00000664693.1, intron 1 of 2)	GRIK3
cluster_1	chr1_3695495_3696157	15.283478296964	6.17197636609291	4.29457903471088	5.19881317688976	14.2328361796386	4.97331812537579	3.87657992959951	5.55325327609019	0.999890150789126	Promoter (1-2kb)	TP73
cluster_1	chr1_37036033_37036742	18.6116304745976	8.04400293264958	1.55283320333965	3.71020677076284	19.6750686059065	7.83871535585337	5.05339769015857	3.0485497679153	0.999884965065962	Promoter (1-2kb)	GRIK3
cluster_1	chr1_3707273_3708191	12.7500749703074	7.07551836412226	2.80021972381189	2.74632529889937	14.2215625471808	5.4365090576118	3.26076087823328	2.32827709812394	0.999780940902479	5' UTR	TP73
cluster_1	chr1_3732516_3733544	14.5340338754369	2.56337592115065	2.46948514827064	1.39309870312103	14.4854477719609	3.46143635687478	2.59088680987935	2.28599451638312	0.999981219362531	3' UTR	TP73
cluster_1	chr1_37394855_37395712	19.6545591127009	6.59875954917254	2.97184605304585	9.75999220805593	24.5436318456704	5.75059809718392	5.51193831908106	5.70263380905854	0.998796523274987	Intron (ENST00000668045.1/107984942, intron 1 of 1)	LOC107984942
cluster_1	chr1_3793212_3794235	22.7609638995569	2.49719451987201	1.2783627917988	2.53241738556826	23.615896856033	1.9433039084646	1.18430079756328	1.42895510213796	0.999958661532034	Promoter (2-3kb)	LRRC47
cluster_1	chr1_38139650_38140651	11.4933742158544	6.09510615461852	3.58762823205194	6.66979207639705	10.8738990416748	8.22909468099611	4.06769925957846	3.06772518851038	0.990929783725292	Promoter (<=1kb)	LINC02786
cluster_1	chr1_38270299_38271074	34.8619409681098	5.22242098160389	1.12150803055453	3.26162530983717	27.7845854233505	4.33839757269659	1.22361598045989	0.988767685011465	0.999853431043272	Distal Intergenic	LINC01343
cluster_1	chr1_38291832_38292640	16.5000751713596	1.6781242580783	1.43761276126992	1.24936824882176	10.8702939088454	3.66985805626852	1.56810363323428	1.86977145961606	0.998744894358524	Distal Intergenic	LINC01343
cluster_1	chr1_38489685_38490421	26.2493022093606	3.90637635662346	1.77685950497521	1.46367840517752	27.3458947450318	1.9030623347682	2.60657577619317	2.07631221819363	0.999975657167991	Intron (ENST00000665359.1/105378656, intron 1 of 1)	LINC01685
cluster_1	chr1_38558009_38559603	13.0860148834656	9.3710651825736	4.5529418739892	6.79828541839418	13.554292420875	8.87847104051245	5.1341841681524	2.25845426217127	0.988879993269786	Distal Intergenic	LINC01685
cluster_1	chr1_38941366_38942146	11.3246436877034	2.6286915824711	1.11618589374355	0.940171273199333	8.64707871665181	2.75454540966898	1.24756866643994	12.029084509959	0.872586681940676	Promoter (<=1kb)	RHBDL2
cluster_1	chr1_38953101_38953953	16.4268612771749	3.33690623989702	1.26092413309647	1.5423113832488	19.1520261586812	2.31022649092674	0.483303933330604	2.91830144913717	0.999956378981265	Intron (ENST00000667635.1/ENST00000667635.1, intron 1 of 1)	RHBDL2
cluster_1	chr1_39001360_39002012	19.2887764113678	2.09966755111395	0.799294726072781	2.09616870546022	20.6656419417284	1.25666276470665	1.54583872779299	0.916722677157332	0.999950580105546	Intron (ENST00000432648.8/79647, intron 3 of 4)	AKIRIN1
cluster_1	chr1_39016588_39017327	17.6286091312247	2.38221151053412	1.54650108770195	1.31743477482249	18.3643189613333	3.84745235536329	2.85113119089644	1.6110743270201	0.999988132125017	Distal Intergenic	NDUFS5
cluster_1	chr1_39230131_39231017	14.255753512924	3.56848508045435	0.594266276705798	0.957273067883202	10.5879644858821	3.52851922928965	2.35511667274086	3.36051789187608	0.999364969429227	Intron (ENST00000361689.7/23499, intron 2 of 93)	MACF1
cluster_1	chr1_39609443_39610451	18.7595885708394	4.3450072508751	2.45586290267859	1.82085830118786	14.1627768423148	3.509340628614	1.86415744977735	2.1707602722741	0.999710383241785	Distal Intergenic	HEYL
cluster_1	chr1_39639224_39640249	27.2274890810438	6.98958413456998	3.44515322874292	2.66569727065979	24.4221192348076	12.6477121974121	6.13585747162083	4.77304584801551	0.999682300015961	Promoter (<=1kb)	HEYL
cluster_1	chr1_39799150_39800202	10.4948616638216	3.66001021377959	2.2966613598832	3.07752573058798	11.6481889619203	4.15790711549575	2.94140088355396	4.48640007327985	0.999896960499262	Promoter (<=1kb)	NA
cluster_1	chr1_39922108_39922847	28.3169762725484	11.0325211489039	1.991673596299	2.57286161422165	21.4880674768893	8.62916569117203	6.33099542110598	2.25140780110718	0.999016199829428	Distal Intergenic	MYCL
cluster_1	chr1_40773523_40774493	20.77588220623	3.03830489771094	0.746641734366703	1.68611652955283	18.3041181512467	3.45681911368944	2.77025467288951	3.63295024400442	0.999923220604245	Distal Intergenic	NFYC
cluster_1	chr1_40802156_40802879	29.1179612456948	20.515232045556	8.94421179709781	3.80909705844796	31.8198910177425	18.595582313096	13.8884346407015	10.5871021346781	0.994353548594012	Intron (ENST00000347132.10/9132, intron 1 of 13)	KCNQ4
cluster_1	chr1_40818034_40819128	25.5381439892685	18.3781257776631	5.79196804834821	5.98737858958185	27.2720995910756	19.3598134602435	12.4190338214803	6.38405146506115	0.987359272434974	Promoter (<=1kb)	KCNQ4
cluster_1	chr1_40837785_40838710	13.0053682982038	2.97118789860762	3.07228883188206	1.80291398476582	14.3282750206086	0.929384581260177	2.75703452163115	2.19207834946497	0.999702942698512	3' UTR	KCNQ4
cluster_1	chr1_40948522_40949335	11.8180620405206	3.87763354325021	1.40342062660341	1.93394336205273	8.58233074273252	3.80599870955912	1.37557220504211	6.19455997743914	0.991710411185951	Distal Intergenic	CTPS1
cluster_1	chr1_40952394_40952948	12.3035379424343	4.3129618723802	2.66781751350973	3.84877631450398	11.3385692842557	5.15529290219454	2.79636248915467	6.09276096772161	0.999055485687	Distal Intergenic	CTPS1
cluster_1	chr1_41021480_41022303	16.2729879555253	2.89989075572199	2.53713138177254	2.14690774573814	13.7120733484127	3.08798938729746	2.44544130521696	1.68120465379019	0.999882706194988	Promoter (<=1kb)	SLFNL1
cluster_1	chr1_41330148_41331880	6.81299260307029	3.61716659545964	2.25952666491287	2.71082935008471	7.62086986548961	7.41412720875004	2.6953381292845	2.34912520629273	0.959131137040051	Intron (ENST00000657314.1/ENST00000657314.1, intron 1 of 1)	FOXO6
cluster_1	chr1_41371732_41372717	21.6308405539739	16.2326014386397	5.77661009575392	6.89299905910382	24.5875760207102	20.4802194989709	10.8926294340864	4.07984362843001	0.964674862623934	Promoter (2-3kb)	FOXO6-AS1
cluster_1	chr1_41435544_41436187	9.28281811077526	8.87387974969184	2.37675407152383	2.76773222133458	13.1696939293894	13.4833049263204	6.8567914104994	2.30168495119945	0.803049217698419	Distal Intergenic	EDN2
cluster_1	chr1_41823187_41824130	16.2507532965244	14.6213699889108	3.1903800156085	3.29352015140709	18.4566609090518	12.8286414426425	7.72234461143361	5.00424234620379	0.970020383911112	Intron (ENST00000372584.5/59269, intron 1 of 7)	HIVEP3
cluster_1	chr1_42146662_42147287	12.9775806551054	5.64582210927673	0.962997497704937	3.9938025617166	10.654792748298	4.93138560795473	3.09588668111641	2.8535434717266	0.998963712131838	Distal Intergenic	GUCA2B
cluster_1	chr1_42922972_42923438	26.5002650728063	8.14974931087411	5.62526505729806	7.50674393716259	27.6542227191916	11.9915858792791	4.99354118842222	6.25245007285387	0.999940478699398	Distal Intergenic	SLC2A1
cluster_1	chr1_42978380_42979350	10.2873616500928	4.32021706920295	1.56374834212777	2.98707066840187	7.72899837896566	3.64043707204811	2.05827394391281	3.53783823855526	0.998366669240329	Intron (ENST00000431759.6/440584, intron 3 of 3)	SLC2A1-DT
cluster_1	chr1_43008062_43009309	46.3044224846895	45.0191386697974	12.0328589910268	6.36166473749525	42.7963040048153	46.4663691339935	39.9966152889709	7.76885357401018	0.688403363036055	Distal Intergenic	SLC2A1-DT
cluster_1	chr1_43067962_43068853	10.2095518800904	1.8989629071087	1.22208837155934	1.45191120563171	9.03248665763111	2.66450745815726	2.10689395819167	4.58009045834105	0.998453108994212	Distal Intergenic	FAM183A
cluster_1	chr1_43206648_43207604	16.7426948754916	3.37395444975291	1.6091957661651	2.47147640371069	12.2504460605988	6.95265028304925	2.69056856559787	17.728568713239	0.850695534330715	3' UTR	CFAP57
cluster_1	chr1_43270288_43271449	33.2266495237528	7.77430464823653	1.56851903196089	2.2660928480168	31.0874968324225	6.16774705538537	2.510349968511	2.69120587146966	0.999993852733466	Promoter (<=1kb)	EBNA1BP2
cluster_1	chr1_43285171_43286121	18.8208881676438	6.54096709495726	2.18313789046292	0.90370958313965	19.2156577767348	4.58763100086369	0.857921759101891	1.78251927345331	0.999971548288984	Promoter (<=1kb)	C1orf210
cluster_1	chr1_43454379_43454965	26.7254439987524	3.32146453035235	2.20980041744041	5.68737658613641	22.6798064237138	7.27189465241097	6.77846984937123	10.2969619631616	0.998133232970102	Promoter (<=1kb)	HYI
cluster_1	chr1_43545667_43546467	31.3676474727367	24.2216571991814	8.91778966909637	8.42059626966468	33.2149979180605	24.7618350024905	20.2375460187986	9.55437516271127	0.973443185588553	Promoter (<=1kb)	PTPRF
cluster_1	chr1_43549881_43550601	42.0603218010764	21.323366550637	6.37071106096114	5.429692489159	39.714019069762	24.4864009283915	15.4682876705403	5.92673207473417	0.997123824642148	Intron (ENST00000496043.5/5792, intron 4 of 4)	PTPRF
cluster_1	chr1_43653215_43653712	24.5074609938222	2.85289665955715	2.51605948247471	2.77445801196876	22.0004663467839	4.24531703951683	2.32428260392075	0.170737613789099	0.999918294362115	Promoter (<=1kb)	KDM4A
cluster_1	chr1_43659545_43660874	17.0747336236348	1.2237181361957	1.242544827277	2.20325922649342	16.2910178531116	1.04881839243185	0.747656229379402	0.33681210389697	0.999861484664558	3' UTR	KDM4A
cluster_1	chr1_43765921_43766810	17.4537167026935	10.075436555068	1.75937687408588	2.70554214063065	13.2679211903453	6.33679147620434	5.46284555677627	1.44011582122198	0.99352016873941	Intron (ENST00000645057.1/9682, intron 16 of 25)	ST3GAL3
cluster_1	chr1_43885127_43885934	20.7890476551854	9.12395465331287	0.967128589006946	2.9252881926349	17.2653854758457	4.7552528002774	3.13257728058568	4.32399354870068	0.999411627890426	Intron (ENST00000645057.1/9682, intron 19 of 25)	ST3GAL3
cluster_1	chr1_43933213_43934041	24.9407967897781	9.54384839060919	4.61652217337337	2.68684317535052	24.1082645979302	11.033026994483	9.79886434501492	9.75466008132256	0.999360493410724	Promoter (<=1kb)	ARTN
cluster_1	chr1_43934129_43934530	24.9597487597791	4.89768425539269	2.84238442951004	3.98568979602717	30.7330736013011	8.88695510405617	6.1951738095799	5.81697233940911	0.999900473795737	Promoter (<=1kb)	ARTN
cluster_1	chr1_43934648_43935093	31.7506473463769	11.8156196819562	8.32194260726836	11.1920249283729	28.8272631550128	17.945650915891	10.792090159097	6.80742077929826	0.999207511806407	Promoter (<=1kb)	ARTN
cluster_1	chr1_43935673_43936995	18.113973523975	8.35757521304006	6.37645803940197	6.82752341806751	20.500228460428	7.9485907401787	6.85189855428374	6.0101322817176	0.999987276624809	Promoter (<=1kb)	ARTN
cluster_1	chr1_44238036_44238759	29.2779158204208	9.26300981219966	6.66888034875034	4.15102292844905	27.5854558471358	10.9991341778563	10.3208088574579	5.67056645504103	0.999900923940259	Intron (ENST00000456170.6/79033, intron 6 of 6)	ERI3-IT1
cluster_1	chr1_44378075_44378916	11.4506444781669	4.64019048839015	1.91968282190361	1.17655591418383	8.81204281734642	3.87301491177346	1.98909250753402	3.31646966386651	0.999072811655235	Distal Intergenic	ERI3
cluster_1	chr1_44417111_44418502	19.5556080325402	21.1945635435165	10.0590262260927	7.03293101546345	21.6554747526526	18.023514142317	11.3310761442238	3.60109066891914	0.85449811817971	Intron (ENST00000355387.6/55182, intron 2 of 14)	NA
cluster_1	chr1_44483950_44484674	12.97041119115	3.70606878472339	0.682641805847832	2.69080145864641	10.8675788934784	4.37330798135741	2.58163121258245	3.63698347259976	0.999649915117851	Intron (ENST00000355387.6/55182, intron 2 of 14)	MIR5584
cluster_1	chr1_44523679_44525104	18.5065106373657	8.34680683144493	5.17980837290228	4.57528039029615	16.9744701613845	8.13745093492722	7.63250541681392	4.36575217730349	0.999811876019457	Intron (ENST00000355387.6/55182, intron 2 of 14)	MIR5584
cluster_1	chr1_44542561_44544085	36.0519883725344	24.0889100006295	10.2691875890044	4.23851024320838	41.3140410280244	25.9076423822925	22.2609541305854	5.4354862081987	0.982852568270827	Promoter (1-2kb)	MIR5584
cluster_1	chr1_44592112_44593003	11.1619126541744	1.01954857970895	1.15092739685648	3.0814461954245	14.6629852472246	2.95329729445189	0.944262109701987	1.86065151787406	0.99947071451575	Intron (ENST00000355387.6/55182, intron 2 of 14)	RNF220
cluster_1	chr1_44594927_44595600	13.1548997794999	5.76928772840816	3.96553832187858	3.7938743350206	14.3780414323181	5.88647540750932	5.08898381242884	4.72636008376428	0.999995187923065	Intron (ENST00000355387.6/55182, intron 2 of 14)	RNF220
cluster_1	chr1_44609436_44610710	10.8975950766669	4.11527433455978	2.74632311623962	4.87601775503598	10.8882120936818	5.78716267920637	3.67681801181574	2.72271965294535	0.999499436780228	Intron (ENST00000355387.6/55182, intron 2 of 14)	RNF220
cluster_1	chr1_44720809_44722347	24.3333563698643	7.09463128955266	2.44494550670486	5.18630981838317	16.999822337948	11.368088998389	6.1323116986172	3.89925322813823	0.996869937762774	Promoter (<=1kb)	RNU5F-1
cluster_1	chr1_44793228_44794057	18.6218242448368	5.40631472971363	2.51175298230715	3.16746799412417	27.0301500621894	5.06743383592358	2.59878283815718	2.12049881977558	0.999749649319338	Distal Intergenic	BEST4
cluster_1	chr1_45573191_45573679	17.9928120268133	8.34662163481559	1.51492827858613	2.57906500581273	17.5787878049257	6.83852465609687	4.15731754224656	2.02438020511029	0.999757404836232	Distal Intergenic	AKR1A1
cluster_1	chr1_45926967_45927957	13.3110061562607	2.48028607256928	1.31463979548037	2.01583812387627	20.7929138386919	8.37256908262967	11.678127595958	3.57720378403856	0.976766340191099	Intron (ENST00000361297.7/23139, intron 4 of 28)	MAST2
cluster_1	chr1_45929174_45929704	16.268040231018	4.1842116042881	1.44481007221745	1.66479300238189	14.0730322102214	7.89144201000344	4.45483392367651	4.74388986269543	0.998966268346369	Intron (ENST00000361297.7/23139, intron 4 of 28)	MAST2
cluster_1	chr1_46166579_46167637	10.604035018733	1.73663383442437	1.97421418347109	1.15293749397807	8.77080564395824	1.97170953757458	1.81825979299597	1.52179249302889	0.999783741677695	Intron (ENST00000540385.2/110117499, intron 1 of 9)	TSPAN1
cluster_1	chr1_46347855_46348523	17.3910981158393	3.59449718980697	3.22734999547401	3.76268311633516	13.65923143535	4.71208889170022	4.27543314422507	6.51740042457532	0.998666187351489	Intron (ENST00000307089.7/387338, intron 2 of 4)	NSUN4
cluster_1	chr1_46406033_46407125	13.2684142592839	5.004432786672	4.90473228421374	8.10968154208972	14.623867329116	7.45960315519375	6.27289582394753	6.76189706768514	0.997809252871064	Promoter (<=1kb)	FAAH
cluster_1	chr1_46442224_46443251	25.3079598745823	12.6880796464001	5.17728868517348	4.55282211753149	31.2068594790223	11.5985476066643	10.2362865961275	6.89573561427513	0.999757515972172	Promoter (<=1kb)	FAAHP1
cluster_1	chr1_46489221_46490125	16.0926822322584	9.44156913409989	3.66698482568312	5.97306146454339	21.642389372158	9.69688445937054	8.37102252892253	4.77900570484778	0.998496882830649	Promoter (<=1kb)	DMBX1
cluster_1	chr1_46516865_46517591	23.2706537220588	9.8991800028255	2.66553185809929	3.16310455220866	22.7020550866012	10.2702859746387	4.89015946622154	5.43929889283051	0.999855460267239	Distal Intergenic	DMBX1
cluster_1	chr1_46613461_46614241	21.8049787286045	8.29415557322041	2.20073232978814	1.95323906423747	18.8531902221889	11.0108081153089	4.26885287949512	5.22190285776096	0.999005611288148	Promoter (<=1kb)	MOB3C
cluster_1	chr1_46747615_46748317	9.33631971066567	3.0306187485449	2.56522392095155	1.8719128398657	11.8492412217266	3.77361847495944	2.98518126001884	3.47539060694395	0.999829216649721	Distal Intergenic	LOC105378699
cluster_1	chr1_47192765_47193468	20.9280910841247	10.0397874759806	4.05000509578629	4.09300241939967	23.6355490181798	6.81156950046406	5.78037991804611	4.99378069333361	0.999962444865647	Promoter (1-2kb)	PDZK1IP1
cluster_1	chr1_47208171_47209488	11.6635816505568	5.36620337714697	4.38497757244968	3.72422378829731	14.9100503842153	5.15124766953233	3.00352240353087	2.96500799564694	0.999779908002665	Distal Intergenic	TAL1
cluster_1	chr1_47230720_47231880	13.0946038890953	3.74197068640598	4.04128449654696	1.75867840638424	13.6589502755076	4.77076767247671	4.41798910744005	3.16056315840289	0.999903211719546	Promoter (<=1kb)	TAL1
cluster_1	chr1_47449814_47450523	12.1446952059955	4.63710513981241	2.36933769976103	3.97714321675996	14.1592831650937	6.17413482168889	4.74455174774872	4.87780656497127	0.999801791105068	Distal Intergenic	FOXD2
cluster_1	chr1_50332913_50334033	20.4778872316589	7.85453934843003	12.0369579753934	9.17143988368594	23.1167249775306	9.73686594056718	11.0094830311121	7.04745527512137	0.997739719876012	Distal Intergenic	LINC02808
cluster_1	chr1_50416709_50417217	19.2281505014098	5.94281731466248	3.32177826879383	3.43565204514845	20.9373662118794	8.02545163304812	3.00991525156783	3.47066197746682	0.999979695877301	Distal Intergenic	DMRTA2
cluster_1	chr1_50430513_50431212	10.3822830058618	5.3417647327939	2.87802137115201	3.29888156831345	11.5396366594827	6.98180560095737	3.50398479249246	5.47769266747976	0.998682536189304	Distal Intergenic	LOC105378714
cluster_1	chr1_50620596_50621387	15.2725148075552	1.79606295337949	2.58925464776739	2.50251141987947	11.3876000999093	2.51895157546636	2.47996960195094	1.07279133194429	0.999089927537789	Intron (ENST00000396153.7/11124, intron 8 of 18)	FAF1
cluster_1	chr1_5119148_5120233	9.25676046312625	2.33424411492354	2.06717100863222	1.65415559672099	6.0792701250123	2.54180922298958	1.67838941222892	3.11060207832796	0.996646769692102	Distal Intergenic	LINC02782
cluster_1	chr1_51344498_51345687	16.7821399185865	5.09364717980844	3.17076386937388	2.614382012991	14.8682663239649	4.175678059236	3.85010335693887	4.28585284793797	0.999945581091901	Promoter (<=1kb)	TTC39A
cluster_1	chr1_52904662_52905476	9.59179002761764	3.660932884761	1.20740742933852	2.18128654849275	13.9329337366718	3.53127521894863	2.35818637947225	2.29021365741292	0.999656690176042	Promoter (<=1kb)	ECHDC2
cluster_1	chr1_52920785_52921971	13.8566916752827	5.54411088613688	2.8595447538901	2.21806618681548	13.1484128903804	5.98822495367313	3.54225500131725	4.23258572885949	0.999937624624904	Promoter (<=1kb)	ECHDC2
cluster_1	chr1_53119906_53121005	14.1823367503905	6.02091338818205	2.77727745819744	3.19934751160091	15.9494408934507	6.20707627261793	5.92600256727751	3.99016127972775	0.999919462071081	Intron (ENST00000611397.5/6512, intron 2 of 9)	SLC1A7
cluster_1	chr1_53430234_53431300	18.4943930767094	2.78788566844824	2.2895331869782	2.25816357599678	19.3436935404329	1.67760075451241	2.23262677225162	3.19279693478241	0.999907669881454	Intron (ENST00000563752.5/163742, intron 1 of 2)	SLC25A3P1
cluster_1	chr1_53434651_53435852	14.7366689331594	2.81954176242693	1.79436970289767	1.65197811504657	6.36982910914518	1.21564426151284	0.942144522987457	1.30020259595694	0.985614669422919	Intron (ENST00000563752.5/163742, intron 1 of 2)	SLC25A3P1
cluster_1	chr1_53470013_53470926	25.4303919465109	7.14007353702936	5.74819747856987	3.20108362463202	28.5701641365421	12.8822607801876	10.8787874054597	4.83512094391048	0.999384662892471	Distal Intergenic	DMRTB1
cluster_1	chr1_53552003_53552855	7.22290594697079	2.6963702626554	2.14619708313657	3.59174703692549	8.32834885759981	1.96279925859982	1.99662723868522	4.78064433858717	0.992803446214214	Intron (ENST00000312233.4/148979, intron 3 of 9)	DMRTB1
cluster_1	chr1_53704992_53705973	13.0857665410865	1.5032864512072	2.00140203679772	1.44111995156179	15.2838513626319	2.2864249628911	2.00556796988688	1.79987960648154	0.999918647856469	Intron (ENST00000312233.4/148979, intron 1 of 9)	GLIS1
cluster_1	chr1_54375708_54376212	13.0748281092508	4.47708966460359	2.37695447905427	5.34576094604137	17.4741921436574	5.93541734253347	4.98774086426199	4.3900319146	0.999357130263637	Intron (ENST00000533946.6/23648, intron 2 of 5)	SSBP3
cluster_1	chr1_54774830_54775580	15.0713349916526	1.97974993479438	3.12585943983933	2.98875492091344	14.1020490951858	3.87523733013161	1.9579747835731	2.8957526841684	0.999812717381314	Distal Intergenic	PARS2
cluster_1	chr1_54780962_54781858	14.3519608458748	4.56429604919823	2.12013735121864	4.02554542714223	14.8155528792491	3.53623809462879	1.7122474149796	2.02189891458654	0.999931940829586	3' UTR	TTC22
cluster_1	chr1_54800676_54801798	11.0771972323732	2.76095704462164	2.00282097366988	1.85628806057736	12.81505970525	1.95995338412788	2.45231151387386	1.37653978067425	0.999948620097739	Promoter (<=1kb)	TTC22
cluster_1	chr1_54813487_54814221	10.0405401678731	3.22727238217077	2.366521380701	2.75278835566128	17.9439311259097	2.69102120447942	2.0569515236406	2.82859893004556	0.997484373628607	Exon (ENST00000358193.7/163747, exon 7 of 11)	LEXM
cluster_1	chr1_55021845_55022525	23.496268165684	8.86452134457488	8.61197542139538	4.81444541929471	27.4346858388243	9.54440416547198	11.0801001982104	8.03277344625281	0.999704522079759	Distal Intergenic	PCSK9
cluster_1	chr1_56453129_56453965	13.9729203965382	4.11618271738265	2.9005880973042	4.65990051525368	18.7076715903542	4.9230613859432	2.00040906925934	2.57389581191547	0.999643028634297	Intron (ENST00000641494.1/8613, intron 3 of 5)	LINC01767
cluster_1	chr1_56535099_56536044	24.0443420882083	7.12039949576573	1.82235651531503	2.86937776909702	23.5748299260445	2.15189770339143	0.953066332361098	1.57669611336248	0.99992993283166	Intron (ENST00000371250.4/8613, intron 2 of 5)	PLPP3
cluster_1	chr1_5830612_5831177	15.9482844927381	4.55907607861824	2.78521357012001	2.57355047153056	15.476077286216	7.22642732818983	4.91553933757095	3.00113654293242	0.999887500556301	Distal Intergenic	MIR4689
cluster_1	chr1_58576584_58577779	16.4850340322779	3.49127922194485	2.71348351461702	1.86481033075024	13.7793701953781	3.77143023142007	2.67315627442339	1.82548401531285	0.999907822197456	Promoter (<=1kb)	TACSTD2
cluster_1	chr1_58814296_58815686	13.1158202898208	6.0331038320693	3.97273671716523	1.18728061618708	13.1733573661666	6.44166393752638	4.48742017734813	13.4544074210719	0.927211408993674	Promoter (<=1kb)	LOC101926907
cluster_1	chr1_59084016_59084795	16.4747089369489	3.76988619007263	1.28559309268839	1.05617698735701	9.99601030550964	2.3715132853789	1.53425721754455	3.52051650670285	0.997195078782798	Intron (ENST00000634502.1/101926925, intron 12 of 13)	LINC01358
cluster_1	chr1_59146577_59147439	14.3537324654038	9.05609432170873	4.77805712838442	1.61966003393378	14.3212153602079	8.09367150240661	5.84434397191334	5.74227108604009	0.996870902646167	Promoter (<=1kb)	HSD52
cluster_1	chr1_59926337_59927145	14.688668820261	4.11426009249575	4.59895241637475	4.42172118556086	13.6779527625803	5.99082497424546	3.07561042737189	5.77424677533353	0.999614113490572	Promoter (<=1kb)	CYP2J2
cluster_1	chr1_60073561_60074291	17.6845513299327	3.50600184158255	3.35812476566234	2.6676538293029	13.4862089055941	4.46919835985649	2.38267217649485	1.16904162590855	0.999510499562376	Promoter (<=1kb)	C1orf87
cluster_1	chr1_6025796_6026522	8.348566204625	3.90185528000787	2.0842929578582	2.82515141278333	13.33536390362	4.55428253111155	3.4148088427508	1.43474579334629	0.997970390378089	Promoter (<=1kb)	KCNAB2
cluster_1	chr1_60886726_60887474	14.2495830245655	4.21705930721186	3.7140103589886	4.16162129469439	13.6447395145837	6.22259364333365	2.12234274387752	2.0157879817522	0.999707115932977	Intron (ENST00000371191.5/4774, intron 1 of 10)	LOC101926964
cluster_1	chr1_61042484_61043999	12.5975798619087	5.20352697224605	4.1517339503201	7.4491808232128	11.165801955705	6.7658694325568	3.39778856114937	5.90094246007338	0.994565641763214	Intron (ENST00000371191.5/4774, intron 1 of 10)	NFIA
cluster_1	chr1_61641613_61642242	13.7089264734078	5.91703391792491	3.31023002205743	0.801410168123961	13.5221403253162	5.26881238899886	3.63969361470269	3.06339843342012	0.999837198601837	Distal Intergenic	MGC34796
cluster_1	chr1_6204856_6205602	29.8552697939456	11.0480461202735	5.49610062327688	5.80012752828545	29.0598230955066	15.6687846406504	9.63242551279591	6.44902307329645	0.999762351189542	Promoter (<=1kb)	RNF207
cluster_1	chr1_6205858_6206485	30.4648589629655	13.6993944151706	5.32898103158921	5.6820448348777	26.0913415966809	14.4089371649073	7.70904695963584	12.5891553991399	0.998887363604368	Promoter (<=1kb)	RNF207
cluster_1	chr1_62194390_62195219	29.8113007905677	6.86834732021906	2.37313297787552	1.98436028486692	34.9501620023437	6.5154415369521	3.98821954150575	1.47323798754813	0.999993240066639	Promoter (<=1kb)	L1TD1
cluster_1	chr1_62198104_62199023	31.2189068048795	2.37207845754026	1.01606867388201	1.83763203103994	34.4345977912689	3.61860493354914	2.15713540776252	1.4209424552096	0.999978607016243	Intron (ENST00000498273.2/54596, intron 2 of 3)	L1TD1
cluster_1	chr1_62212493_62214026	21.1220552475095	0.427997162371583	0.701221907396004	0.828973299665566	14.4748432284289	0.278285562914528	0.710137728560814	0.9620147799256	0.998965010645399	Downstream (<=300bp)	L1TD1
cluster_1	chr1_62279074_62279814	11.3874281260158	6.37545324968366	2.16526066018111	3.18805119626041	14.5772836016915	6.06479628760374	2.33727368401174	2.21825664215558	0.999324455901604	Intron (ENST00000371153.9/163782, intron 2 of 9)	KANK4
cluster_1	chr1_62327265_62328153	15.4849326677555	1.62492599900069	1.32158295913736	1.45655719673573	15.1136725347091	1.77381940372908	1.21581351513646	0.829159557379957	0.99996213173189	Distal Intergenic	KANK4
cluster_1	chr1_62755754_62756804	15.5763578484175	1.09366934529145	0.985891420996908	2.5576930749907	8.41701017978144	0.932362311659687	0.490208434063483	0.705130509732995	0.994257008535426	Distal Intergenic	ATG4C
cluster_1	chr1_62962881_62963636	8.82487186788372	5.27434723597796	3.85566738643978	3.11596436430581	14.3770829254387	5.11421612393868	4.46833600389393	2.98992609369601	0.996961869228838	Distal Intergenic	LINC01739
cluster_1	chr1_63189572_63190394	20.8047026855001	1.54607212233598	1.57932475410973	1.83854039088643	13.9085904646484	1.84257540912806	1.43592105985801	0.556280013688119	0.998844972328796	Exon (ENST00000455304.6/199899, exon 5 of 5)	LINC00466
cluster_1	chr1_63294678_63295496	17.1554208652896	3.35547052961292	1.47854591814062	1.74098835501111	14.1134320150489	3.08970904730405	3.10563660142313	4.87247527820539	0.999583256180708	Intron (ENST00000666431.1/199899, intron 2 of 10)	LINC00466
cluster_1	chr1_63316826_63317841	27.6432021733576	8.56222221523805	5.57770752451854	3.13538740143785	39.8323263145716	7.69403540413461	6.0574319765373	2.84466550651982	0.999712660998291	Promoter (<=1kb)	LINC00466
cluster_1	chr1_63327552_63327987	26.2602458209606	9.21910804301842	10.0575154876163	4.46455127498743	31.0020915564496	14.506101817081	6.59491697295007	3.25823844739323	0.999163361887043	Promoter (<=1kb)	MIR6068
cluster_1	chr1_63441311_63442081	10.4948011602571	3.26143200175752	4.59640277479847	2.92032893289112	10.019670891396	3.59706792946371	4.21825651448083	5.08186321239281	0.998528235229782	Intron (ENST00000492655.1/23421, intron 1 of 1)	ITGB3BP
cluster_1	chr1_63574011_63574849	9.77495389333992	3.75392582347953	1.1324011451302	1.84383371173315	16.223672101161	1.86705818161787	1.07710328286045	0.818056933289912	0.998910781701574	Intron (ENST00000478138.1/23421, intron 1 of 4)	PGM1
cluster_1	chr1_63782832_63783651	17.6300337533898	3.14522333095719	1.12815183672189	2.11884526983286	22.6980991543803	1.67496269799909	1.63583432020696	1.07725792014238	0.999901042979772	Intron (ENST00000371079.6/4919, intron 1 of 8)	ROR1
cluster_1	chr1_6385524_6386385	19.1065822300604	7.37671529872857	2.4217076935992	5.46777429913885	16.7930732255222	7.42825544387598	4.1492838116082	12.3521027198278	0.991293610683549	Promoter (<=1kb)	ACOT7
cluster_1	chr1_6414282_6414798	13.618621470506	6.7941642402629	2.88022363212544	4.83704377546891	17.6853921573223	6.0203315980122	4.63262802271296	6.52778352781097	0.999505165402268	Intron (ENST00000377837.5/54626, intron 3 of 3)	HES2
cluster_1	chr1_6423415_6423929	16.946373450946	8.89295330868696	3.12673729514554	4.64092672454684	19.7300025804709	7.81212559571008	5.73841524180007	5.33261209498913	0.99988899003596	Promoter (<=1kb)	HES2
cluster_1	chr1_6437968_6438456	22.2177615660031	4.94214182212018	2.85368378756134	7.40005341562313	18.5113049202094	5.79203143819779	7.21404148109118	5.33501543358318	0.998934830926242	Promoter (<=1kb)	ESPN
cluster_1	chr1_6440216_6441052	22.9502288784794	12.8174008940977	2.83736686631936	3.24380388698363	19.8483691139375	12.0402489987999	8.40187952922052	4.74229970071082	0.996213402921852	Promoter (<=1kb)	ESPN
cluster_1	chr1_6447029_6448524	40.2888375420267	18.1340468576965	6.05867889372654	3.91115338047672	39.2718509480067	13.3152147666271	10.4602886430029	6.99015436942023	0.99989537517622	Promoter (<=1kb)	ESPN
cluster_1	chr1_64472799_64473326	30.6948641758301	18.3443645597082	10.9589863624684	4.53241516270423	42.048980496238	8.57374030179967	8.24078809416157	2.63539316429351	0.998283412510644	Promoter (2-3kb)	CACHD1
cluster_1	chr1_6448554_6449473	22.7527049233089	13.616947096166	5.85245402589484	5.77327664963941	22.7866369450567	13.075328968445	9.35018517743132	8.02278925999331	0.999215222050152	Promoter (<=1kb)	ESPN
cluster_1	chr1_64497180_64497931	18.348430835936	4.47543234455252	3.8991155206903	2.6527939111191	26.2048929129462	5.7205999815516	9.19426004530272	10.1159316348669	0.99564175569698	Intron (ENST00000651257.2/57685, intron 1 of 26)	CACHD1
cluster_1	chr1_6454858_6455822	8.97114502181441	2.59871159489112	2.34648356528603	0.821139877964905	18.2257071068038	2.94717708448849	2.74674576339853	1.98842365693013	0.995517077976507	Exon (ENST00000636330.1/83715, exon 11 of 11)	ESPN
cluster_1	chr1_6465541_6466544	14.2301455707611	4.60237723657264	2.39346103281906	2.24839300748465	14.4616438116287	5.06311350996392	1.53633639935907	2.19450916101273	0.999983682013518	Promoter (<=1kb)	TNFRSF25
cluster_1	chr1_6470841_6471864	14.5358411938242	3.25368497865477	1.89823843979703	1.85661301361289	19.737780044552	1.86393039716424	1.23305908206281	1.90456248057311	0.999816033758813	Promoter (<=1kb)	PLEKHG5
cluster_1	chr1_6486189_6486857	24.9205101154019	12.0118988699265	9.50358139502577	10.6688960582195	25.5115225860753	14.9526511192204	10.3293954671925	8.12829201364698	0.999853532560562	Promoter (<=1kb)	PLEKHG5
cluster_1	chr1_65026101_65026908	14.5168760172898	1.67971816236801	1.27190930277464	1.44777634336247	15.4952145844037	1.79085880630681	1.54673031298449	2.68892689010926	0.999930656805092	Intron (ENST00000671954.2/3716, intron 2 of 25)	LINC01359
cluster_1	chr1_65278460_65279548	9.06555971896493	3.16363500653261	2.63299659364915	3.08630860016161	8.7327063954162	4.19730052126728	2.14716621593849	3.81788003341778	0.999764871977217	Exon (ENST00000435739.1/102724416, exon 2 of 2)	DNAJC6
cluster_1	chr1_65550035_65551005	11.5577697359926	1.56808492136481	0.634248113577141	0.723850167572539	17.1543312827922	5.38767392863994	1.94322211812471	1.58993278191586	0.999289008085897	Intron (ENST00000371059.7/3953, intron 2 of 19)	LEPR
cluster_1	chr1_67341905_67342746	14.6544404656457	2.38102568794969	1.5680404743654	2.21709664370413	18.6637261733563	1.50292327602561	1.54566838843478	0.606271891695856	0.999854422946095	Promoter (<=1kb)	IL12RB2
cluster_1	chr1_67458648_67459424	19.4760204067164	3.62532371807834	1.09756814354073	1.74478489863628	22.985410981326	2.05832938015257	2.87662848673689	3.05040058312364	0.999947522420941	Distal Intergenic	SERBP1
cluster_1	chr1_69077171_69078354	9.18056851723573	4.99177897619421	2.32019882157034	2.14037932736237	9.04642290311604	8.2313408128175	7.51985030023943	2.19702063858618	0.916341666077669	Intron (ENST00000658427.1/105378787, intron 1 of 3)	LINC01707
cluster_1	chr1_6956609_6957239	15.5096636102453	5.05921274127403	0.985694173718488	2.81560260040643	18.2449136406746	2.58536195601622	1.59842281697899	1.02930978152863	0.999942958067656	Intron (ENST00000303635.12/23261, intron 3 of 22)	CAMTA1
cluster_1	chr1_6962067_6963981	67.4278642466788	24.1653563799131	10.5323551918838	6.93171809934693	67.6007973278303	49.6865298855885	32.5851782907398	12.57120072417	0.990727844681103	Intron (ENST00000303635.12/23261, intron 3 of 22)	CAMTA1
cluster_1	chr1_70706191_70707121	10.6314377837091	5.42905179042783	7.35389260297073	1.60435352320521	15.1949027571352	3.58460862910455	3.05480249570394	1.53161183163385	0.991720531211063	Promoter (<=1kb)	LINC01788
cluster_1	chr1_7297867_7298543	15.0341445045131	3.0715670522578	0.308434344010751	2.66107057445409	16.393104061134	2.63536672634666	1.30818261936342	2.06438632209484	0.999971386602636	Intron (ENST00000303635.12/23261, intron 5 of 22)	CAMTA1
cluster_1	chr1_75092024_75092643	19.3027270287975	7.64019066497219	2.17979804112186	0.868672716427507	18.6084878088529	1.20655149442526	1.02751459416657	0.858414317291109	0.999686699110878	Distal Intergenic	LHX8
cluster_1	chr1_75672194_75673163	15.2079005321486	2.76401062650934	1.16653546006051	2.02056367704525	7.2756663544797	2.53498038605736	0.878583812224945	2.71429855136499	0.990082610824813	Intron (ENST00000648424.1/204962, intron 2 of 2)	SLC44A5
cluster_1	chr1_75677690_75678592	17.781876330967	4.13350414828516	6.83022907035951	4.1648151637461	10.4765991096687	1.91333208141441	0.989224344564392	0.884496637152414	0.982818750788874	Intron (ENST00000648424.1/204962, intron 2 of 2)	SLC44A5
cluster_1	chr1_75796638_75797825	12.076165313131	1.65282679686012	2.3996994552154	2.40163012627376	12.8745565438304	1.39833921825863	0.977674551412725	1.73477231523002	0.999755336133039	Promoter (<=1kb)	MSH4
cluster_1	chr1_77514290_77515949	11.4788351495919	5.84680734865478	3.12530578410933	1.88776882707885	10.9997942050768	4.59222076845759	4.24412914469623	3.80113212425158	0.999774595933347	Intron (ENST00000354567.7/26289, intron 10 of 13)	AK5
cluster_1	chr1_77687272_77688176	18.8960242969706	2.02280385445562	2.51118730418053	0.837332821929763	15.2478240818958	2.91279144224994	2.71766838430544	1.87489717938019	0.999745850848043	Distal Intergenic	ZZZ3
cluster_1	chr1_7885339_7886267	33.5410723729777	2.95440528310976	0.405680982574956	1.72065915411764	36.25448628086	0.649729114112965	1.25741948124257	2.1921761076406	0.999950098173975	Distal Intergenic	UTS2
cluster_1	chr1_79193079_79193899	14.7776279526932	5.6662756507777	1.56653691367812	2.81004076930672	10.8648852333376	1.31855329465924	2.71969212786367	1.45693082616116	0.998086561157083	Intron (ENST00000661030.1/64123, intron 1 of 16)	ADGRL4
cluster_1	chr1_79262633_79263394	18.6723421448175	4.0142450517906	2.09374356792187	1.52390815902462	13.3706335840424	2.05926777012326	1.00991329024398	1.33029339305912	0.999401128434264	Intron (ENST00000661030.1/64123, intron 1 of 16)	ADGRL4
cluster_1	chr1_7991637_7992452	20.2527773579887	6.67631202979586	1.12576372478787	1.19635796712281	26.167244114349	3.99833953613163	1.76195827418238	2.9894816026313	0.999940805230918	Intron (ENST00000641354.1/ENST00000641354.1, intron 1 of 5)	ERRFI1
cluster_1	chr1_81312191_81312971	12.9975672101342	2.52203020032671	1.93422876573223	1.3272562898435	18.7348713140476	1.48683849490335	2.20330282927843	1.44802560522798	0.999612948978074	Intron (ENST00000674378.1/23266, intron 1 of 5)	ADGRL2
cluster_1	chr1_8166847_8167690	19.2902489095447	2.85132923545936	0.99983876867029	3.03631389328941	13.7759394879532	1.49577552743327	0.914643132343651	2.44660757296896	0.99901441666811	Distal Intergenic	LINC01714
cluster_1	chr1_81682119_81683065	11.5634702771345	6.73550222603694	1.30247734945527	2.34127934989061	10.1705323586902	9.64619946129847	7.18524241338629	1.61226201223191	0.938628390877122	Intron (ENST00000674378.1/23266, intron 4 of 5)	ADGRL2
cluster_1	chr1_8216853_8217809	15.2372087485246	7.53052553298087	2.3101646124532	1.80754297958534	13.5177951024038	5.88781371935163	4.04071491171062	5.34975617267346	0.999230811889616	Distal Intergenic	LINC01714
cluster_1	chr1_8348930_8349488	11.0678255149087	6.71725023344233	3.00387094142135	2.57585859702018	15.514926977044	9.86518659367438	5.35903533880166	3.54487081656946	0.991196610333283	Distal Intergenic	RERE
cluster_1	chr1_83860345_83861275	17.974964435596	3.20345740310331	4.91106761879235	1.83523999013005	15.1069073502416	1.82721444958894	2.81104171101726	3.23301400977391	0.999184061009283	Promoter (<=1kb)	LOC101927560
cluster_1	chr1_8443368_8444254	26.684269991542	1.56561232916653	1.2379054555396	0.849165059667798	24.8084511953726	2.86203307647803	2.13652087613115	2.39143307089359	0.999943285350323	Intron (ENST00000337907.7/473, intron 12 of 23)	RERE-AS1
cluster_1	chr1_84740031_84741018	7.52833763145227	1.79362941057419	1.97879465781135	3.6781885406132	7.8968369915703	2.10246241387009	3.8052133090399	3.52346568334744	0.994346939207638	Distal Intergenic	SSX2IP
cluster_1	chr1_84763575_84764739	6.54459554623721	2.0445049695105	2.278818472859	3.88952365302411	8.44011978381179	2.12358217095222	2.96498680963368	3.57695761227904	0.993880462923164	Distal Intergenic	SSX2IP
cluster_1	chr1_84774648_84775670	7.69733211186367	1.83444165498102	6.57014374143567	5.68152580489981	7.816322850439	2.16670204690011	2.07650927097353	4.26567371559522	0.867972144639131	Distal Intergenic	SSX2IP
cluster_1	chr1_85343343_85344704	10.6987344823693	3.45943732997664	5.56843337102113	8.42981713610019	9.17785647993917	2.31997007908949	2.97534965347183	2.98317401660432	0.929306298814258	Intron (ENST00000654182.1/646626, intron 2 of 2)	DDAH1
cluster_1	chr1_85607046_85607923	20.8606021289033	10.5106867788843	4.02795452480034	2.49754086849251	26.6365133779706	10.3373538367688	5.75711805751602	11.4186045599789	0.998260753141471	Distal Intergenic	CCN1
cluster_1	chr1_86154743_86155534	14.7896538852499	6.92575954706354	6.8739424961535	2.57013894811225	13.4641409356364	6.23996089696991	3.74788157908573	3.35982270941881	0.998605034298004	Promoter (1-2kb)	COL24A1
cluster_1	chr1_86502125_86503509	20.2188531110639	4.45557997008575	4.75975333721422	3.09892920435902	13.0036676500767	3.08347764609461	1.85973682588487	2.95183975104096	0.997108622511634	Distal Intergenic	CLCA1
cluster_1	chr1_8873383_8874035	17.4012134425649	6.54771975669466	2.40115732215288	6.20693890935862	22.1197924443933	8.68026220190564	6.4537377069454	19.6806434298233	0.934559112138941	Promoter (1-2kb)	ENO1
cluster_1	chr1_89910681_89911250	26.8449084078338	10.2149253226139	5.46178977792437	3.62507411561535	28.1884129713043	10.5944041870399	8.86983687663552	8.15010525378973	0.999962959449845	Intron (ENST00000370453.5/55144, intron 3 of 3)	LRRC8D
cluster_1	chr1_89929103_89930124	17.6431750356921	3.04924857800193	0.55709486962513	1.86567943542215	18.3106087636936	1.00661549675366	0.950326119119546	1.96925836527461	0.999953957346635	5' UTR	GEMIN8P4
cluster_1	chr1_9009154_9010438	12.7544676860773	3.4978463243799	1.69157476808707	1.49501570706643	15.4910928781514	5.07265230664601	1.64450347534916	1.37200630759282	0.999951189519181	Exon (ENST00000400906.2/155184, exon 9 of 12)	SLC2A7
cluster_1	chr1_90219064_90219971	17.7960454504642	11.3645415182492	3.62485590710224	3.82090784493393	16.7864078206651	4.41824973046934	3.81957769683763	2.86964767314845	0.997862737365058	Distal Intergenic	LOC105378849
cluster_1	chr1_90561548_90562435	17.9490463606983	3.49868842082681	6.58819184188386	5.79903916535449	21.7700843433294	2.76897235960243	5.31208143671976	0.979639602396682	0.997909678325185	Distal Intergenic	LINC02787
cluster_1	chr1_90974030_90974931	12.5157622296816	1.8094410178935	1.39754144358852	3.02300846198314	8.47032840133355	2.5410666013566	2.74891361067427	3.46861166687607	0.996610297953372	Intron (ENST00000370440.5/84146, intron 2 of 5)	ZNF644
cluster_1	chr1_91644881_91645622	12.0042179314114	8.9016592938636	1.66016655640261	2.71655186669461	14.5638867307103	7.80486037340339	5.91689879576953	3.38097574869462	0.993366543496726	Distal Intergenic	TGFBR3
cluster_1	chr1_9249807_9250407	13.1987548954716	4.77961618970982	2.39275769495399	4.11059869229476	13.9264980726025	5.98914373103011	4.65531501541237	5.8262602861525	0.999786087216818	Intron (ENST00000377403.7/9563, intron 3 of 4)	H6PD
cluster_1	chr1_9266832_9267568	17.2200677428777	5.77439201966332	4.51872658603974	4.53548309611598	15.1713162569275	9.07342859167391	6.07666913709409	5.37400432054254	0.999612264706691	3' UTR	SPSB1
cluster_1	chr1_93410928_93411978	9.3470649002803	0.782312060091212	1.19429353529306	2.36749859124048	14.7757492676193	0.48313506005946	0.380590798990575	0.889679650190649	0.998332513312507	Distal Intergenic	FNBP1L
cluster_1	chr1_9455733_9456234	12.6235389758543	6.87763976469718	3.09157160350978	3.64786584510071	13.0354173395303	9.86768348058966	4.98505670376271	4.43187716335507	0.995195693207661	Distal Intergenic	LINC02606
cluster_1	chr1_94688504_94689357	19.3537219523913	5.3331373592379	4.81091818080828	2.17193963413977	17.9282769480986	7.2027815240585	9.2432995390823	1.14552313678094	0.997714856767614	Intron (ENST00000634870.1/101928079, intron 2 of 5)	SLC44A3-AS1
cluster_1	chr1_9494924_9495850	11.9659743495839	4.80574963281366	2.08831576045122	3.4702973678495	10.4069385584548	3.93057774508202	3.39300601753131	3.10286580870748	0.999876419774466	Distal Intergenic	SLC25A33
cluster_1	chr1_9626861_9627603	18.3992352709437	9.72220315785076	5.58227920295572	5.1110182674422	19.114205808773	6.91162682618403	5.4441111279732	6.38083999827102	0.999955824198214	Promoter (2-3kb)	PIK3CD
cluster_1	chr1_96715137_96716004	22.9775076646447	0.816042075050075	0.798119268428467	2.26679844465296	23.2095464176826	0.910496522074403	0.622978512927086	1.69078940917344	0.999874958273089	Distal Intergenic	PTBP2
cluster_1	chr1_9714193_9714971	25.5514133640136	1.24885577177176	0.6325779432234	1.43314688938381	34.418845680883	2.15747243848629	1.07046761951424	2.15568672787784	0.999819696827403	Promoter (<=1kb)	PIK3CD
cluster_1	chr1_9717352_9718032	17.1028525513671	2.57526864727551	1.52660535017632	2.31924859719929	17.012086257202	5.7347138605753	1.29332280113326	3.30499087605314	0.999927402510901	Promoter (<=1kb)	PIK3CD
cluster_1	chr1_9721477_9722113	20.3224514902723	4.23236113357799	2.84039446763497	1.97563700054048	16.0655754838557	7.12222870950504	1.68036742482707	2.75410831460773	0.999635925644102	Promoter (<=1kb)	PIK3CD
cluster_1	chr1_9724850_9725369	20.2302600100578	3.90326540617918	1.72336677737022	2.99964520436371	19.8362866738312	2.65513775220696	1.81332948433668	2.16043790756702	0.999971709271438	3' UTR	PIK3CD
cluster_1	chr1_9825232_9825792	14.6306185496471	6.87559660425267	2.50106760932236	4.72146103649812	14.5445390958442	9.46019618137867	3.29791088135001	13.8267901951943	0.94370061774628	Promoter (1-2kb)	CLSTN1
cluster_1	chr1_99514584_99515499	16.1218633721328	1.2516776820637	0.958579651256567	1.55116850365459	13.0084409974475	0.788430439250736	0.593308825972644	1.02541746553708	0.999685232081434	Intron (ENST00000635551.1/101928270, intron 2 of 4)	LINC01708
cluster_1	chr1_9960752_9961608	8.37162081850935	3.66475524968599	1.81096498029608	2.88849005122404	8.6919484603588	3.80141304369665	2.08796350928093	2.96612771533814	0.999941429901385	Promoter (<=1kb)	TMEM274P
cluster_1	chr1_99736958_99737433	9.09766071911742	2.82684791302656	6.03834249859927	4.50914897383952	9.3535394393288	3.57942645418713	6.87969638560682	9.65548187810046	0.79747685302555	Intron (ENST00000646001.2/391059, intron 7 of 16)	FRRS1
cluster_1	chr10_100300910_100301606	19.5421061589198	9.40063982852765	2.46273567455897	0.95154013479016	20.0288711198604	2.2897677674364	0.678814782162156	1.38320792096349	0.999485231615481	Intron (ENST00000318222.4/9033, intron 2 of 15)	BLOC1S2
cluster_1	chr10_100364630_100365437	9.787540733018	0.983720053035921	1.08326485108626	4.15458202730606	8.57764204053434	1.09427255147811	0.972656481464793	5.41585733180215	0.981800411250642	3' UTR	OLMALINC
cluster_1	chr10_100637744_100638401	12.5633211420028	6.84404787978083	4.75502860757109	1.04128505474431	14.2144332628362	6.3234392580405	2.97410840562388	1.85388978494847	0.998567203847053	Distal Intergenic	PAX2
cluster_1	chr10_100729109_100730169	11.4382475776864	5.62181454693522	3.40283578002977	2.74061545815257	12.4339681639991	6.76874039515773	5.0021843126453	3.00041133083703	0.999568280877824	Distal Intergenic	PAX2
cluster_1	chr10_100737263_100737940	15.4671887527034	4.27867609964022	3.15123694813647	2.33021705421771	16.8248841534477	4.63301264526808	2.43022518969028	1.7170268390361	0.999991090476706	Promoter (1-2kb)	PAX2
cluster_1	chr10_100745103_100746286	21.5952730702828	10.0816255240346	4.86373487280743	4.95616568513766	22.6362051804262	12.0501748728519	9.30637990896797	6.42155299262269	0.999675901062551	Promoter (<=1kb)	PAX2
cluster_1	chr10_100866454_100867171	11.1009540174633	5.33613294774179	2.94432414532788	2.53389599230217	12.0497264818002	9.58609836554849	10.1960158565772	1.4537720237775	0.910798146402643	Distal Intergenic	SLF2
cluster_1	chr10_101018310_101019485	13.7237372745009	9.12008639449768	7.3211692540077	4.78737903956935	14.4330173230491	11.3321422501296	6.93757681935097	4.10728342132195	0.987671153469727	3' UTR	PDZD7
cluster_1	chr10_101050096_101050669	16.6004973852788	8.68746828568083	4.39121253533629	6.01494877608968	13.04132024655	7.74509511424035	7.41850355723869	3.63823574536988	0.996662815621359	Distal Intergenic	KAZALD1
cluster_1	chr10_101095374_101096089	34.5189108952936	5.8585140968224	3.55326431595146	4.42395049907198	32.5019851551181	6.1013109783729	3.32605780940915	5.01004379719463	0.999973546849098	Intron (ENST00000445873.5/100038246, intron 2 of 2)	KAZALD1
cluster_1	chr10_101139581_101140266	9.32906644910858	7.18059144249392	4.31921332673584	1.54220608781391	10.1314630821985	6.28356333858957	4.49411485989104	2.04102008774489	0.985274966680562	Distal Intergenic	TLX1
cluster_1	chr10_101146618_101147479	8.35730726368839	2.30231611649468	1.40669829985974	2.2944887499561	9.68155249125747	4.57724618437617	3.78985119497087	1.51059157642998	0.998960345103649	Distal Intergenic	TLX1
cluster_1	chr10_101161578_101162435	12.8117372143579	6.59509747957319	3.85828067270648	3.36149268712685	13.0491966930591	5.76085297905844	4.20655249627789	4.2896565510123	0.999978412462007	Distal Intergenic	LINC01514
cluster_1	chr10_101236342_101237571	14.7266885260557	6.99347736195509	1.98587147159317	2.27323155527753	17.9003994057289	6.43870034389418	4.05625895537278	3.1248092522628	0.999866300336265	Promoter (<=1kb)	LBX1-AS1
cluster_1	chr10_101272124_101272846	15.182881994712	5.27525645624879	4.31278268023153	5.40035667151266	14.9642382529112	5.3890702040243	2.96972851317948	2.91615483172418	0.999854017682921	Distal Intergenic	LINC02681
cluster_1	chr10_101285507_101286149	21.1788858596057	11.4895961689489	5.03098010948391	3.78674895230702	26.1046930536143	6.54405045713887	3.14345924805712	1.10127026726469	0.999402871471308	Promoter (1-2kb)	LOC105378453
cluster_1	chr10_101310335_101311747	12.2746111731935	2.76203229695216	3.03828494667548	5.82530501296924	13.0171500580433	5.17841715878244	2.75381699610474	4.08474115211343	0.998712464732898	Exon (ENST00000442188.1/ENST00000442188.1, exon 1 of 2)	LOC105378453
cluster_1	chr10_101759282_101760158	10.630403735743	6.012934290493	2.32832887564862	2.77620292891314	14.2988657005575	9.22527784713552	4.27899977057094	1.99827793420258	0.991959643061358	Distal Intergenic	FGF8
cluster_1	chr10_101779077_101779483	25.3546205578768	18.2433687581918	7.64769370274836	3.55049978797753	22.8655029550463	15.5600491407386	12.3894065240658	4.87835350249974	0.981409135107937	Promoter (<=1kb)	FGF8
cluster_1	chr10_101843362_101844151	25.7239070785918	8.26758153931596	5.2189417644847	8.78214822340715	28.7826625593356	10.9775950004544	6.46790807073889	3.06443863171055	0.999815092072092	Promoter (<=1kb)	KCNIP2
cluster_1	chr10_102229845_102232149	17.2187970604355	10.7578548476602	7.35074113489125	6.19492528882954	18.3611616063193	12.7776203504576	7.89161308956833	11.7400885291364	0.995427889313536	Promoter (<=1kb)	PITX3
cluster_1	chr10_102403772_102404196	17.2930046972577	8.53345878453771	5.03567663435386	6.72315562500356	24.1985149533373	8.86276126030877	8.43209721842876	7.22218842688292	0.999282869150874	Promoter (1-2kb)	PSD
cluster_1	chr10_102435466_102435981	12.6737420940666	3.90103626023956	2.16946098709924	1.73596704328402	18.6424869552205	8.81341966456441	3.86251547555683	5.71077796234289	0.996710497307197	Promoter (<=1kb)	MIR146B
cluster_1	chr10_103458744_103459329	14.4795367257742	4.26273463304862	3.59565524860684	3.1773126081394	11.5329666598468	6.03030958081227	3.66624345376062	2.71798092864889	0.999539872462825	Promoter (<=1kb)	CALHM1
cluster_1	chr10_103476257_103477154	9.60210155718934	1.99078185336988	2.8254021375754	2.36944328844193	11.1132910527654	6.5328979683102	4.28111983877516	2.01014934228098	0.996372911627457	Promoter (2-3kb)	CALHM3
cluster_1	chr10_104067011_104067850	9.50877854300522	4.029434153961	2.21672421815619	1.53804249768383	10.078728367893	4.95706915667292	5.48618689408701	1.7233478026514	0.997295352604727	Promoter (2-3kb)	COL17A1
cluster_1	chr10_104305493_104306025	16.159317837921	6.53294385186986	7.25663953045999	4.84124656298321	12.9929596930751	4.93370741611421	7.79657945361495	10.4938912664105	0.98183419418272	Distal Intergenic	GSTO2
cluster_1	chr10_109934201_109935659	25.184584474008	6.7893916221548	3.08510569757778	3.60266941089025	27.7217036558236	7.55475349518537	6.86576367562636	8.5529210436597	0.999914167600565	Distal Intergenic	XPNPEP1
cluster_1	chr10_110168837_110169587	9.18933001499858	2.83092789513396	1.43504890453083	0.575924575565371	21.7429750073111	1.45308282753642	2.19563705415221	2.11413430080054	0.992664546825777	Distal Intergenic	MXI1
cluster_1	chr10_110353217_110354714	8.2133444370608	3.2633150332665	5.55116694107252	9.6473386395767	7.31630468429831	3.22876516271166	2.73506760873334	2.65898517994316	0.657210325200636	Distal Intergenic	SMNDC1
cluster_1	chr10_110499204_110499808	17.0248214270608	6.17491080738837	3.54810564528307	5.69309746275498	19.5405802045378	9.09182164343776	4.95788777383179	4.69938746123731	0.999858609898862	Promoter (1-2kb)	DUSP5
cluster_1	chr10_110529610_110530847	23.5384907803329	6.46421124972958	2.81840420518557	2.6296316346787	21.4785570557562	7.51240697956484	4.12584515698273	2.92123461544679	0.999981532953033	Distal Intergenic	DUSP5
cluster_1	chr10_111136714_111137465	20.3835192372981	7.26781578692073	2.58320982636523	1.82034027883498	26.9102943307228	6.58727173956915	7.0404504078019	3.29205037325572	0.999789301900665	Distal Intergenic	ADRA2A
cluster_1	chr10_112811712_112812888	14.3939835029411	5.64758570553987	2.82857495209476	6.00829395596202	19.0154247780943	4.96725469374683	6.73243024867378	12.9711955896984	0.977127267181654	Intron (ENST00000393077.3/143187, intron 7 of 7)	NA
cluster_1	chr10_112831933_112833062	23.6333198188313	3.10621468120382	2.26662577309298	2.27798931500561	27.1016453260254	5.99961383471808	6.22222625648213	3.76329497266514	0.999910238822486	Exon (ENST00000624062.1/ENST00000624062.1, exon 1 of 1)	LOC103344931
cluster_1	chr10_112898340_112899503	16.855533619553	8.63626893360829	2.81127055794247	3.52240867514365	23.5194529961178	11.958594942394	8.95190911975876	4.7213263774715	0.996287620356181	Intron (ENST00000428766.2/107984158, intron 2 of 2)	LINC02935
cluster_1	chr10_113053773_113054447	30.9998129552477	4.80072983186165	1.88263917600797	6.68698597584021	27.0259150412058	4.92880098049485	4.23488240556792	1.50748114940374	0.999772037493178	Intron (ENST00000355995.9/6934, intron 5 of 14)	TCF7L2
cluster_1	chr10_113616725_113617472	10.2844319539892	4.72784657195641	2.99311321370442	2.21518081714217	11.6135284905746	3.70059906378028	2.72575887558656	1.06352304353989	0.99984517727495	Exon (ENST00000359988.4/4892, exon 26 of 42)	NRAP
cluster_1	chr10_114239155_114240246	17.2481078436322	5.49399600938029	3.91367964592795	4.13591106378594	14.5886452374629	6.04770193024366	5.65894566437347	4.18846835855266	0.999866349240559	Promoter (<=1kb)	VWA2
cluster_1	chr10_114874750_114875442	13.9544190124388	4.60335717683857	6.73066658121734	5.72078504502938	14.1534242147164	3.89188596690093	4.05666070173084	2.22655579234141	0.997515515062862	Intron (ENST00000369250.7/57700, intron 16 of 16)	FHIP2A
cluster_1	chr10_116608961_116610171	21.2847988866531	9.65035832472364	5.46534717149933	5.2114384616669	18.7734458471928	9.34047626220216	8.03245757787045	3.98784968774878	0.999620210588328	3' UTR	PNLIPRP2
cluster_1	chr10_116627292_116628146	12.8434101379318	3.75095438475437	4.62447427243866	3.11741154339896	17.0011240895574	6.93213478574541	6.93992788572571	5.23547037872125	0.998132923441818	Exon (ENST00000579578.6/5408, exon 6 of 13)	PNLIPRP2
cluster_1	chr10_116669717_116670701	22.212869862019	6.97983556636736	2.00344681472215	3.30105729274525	22.1294940344632	5.28700646615536	4.44778742687193	3.61741188002419	0.999994548953714	Promoter (<=1kb)	HSPA12A-AS1
cluster_1	chr10_117084242_117085207	14.0877222321035	3.32591867877204	1.07931017195761	1.07811502907933	10.3268395944994	1.74935119076025	0.984064768825858	1.22877459672601	0.999595809403653	Intron (ENST00000392901.10/57698, intron 1 of 17)	SHTN1
cluster_1	chr10_117162699_117163559	20.6571136200295	11.0668238254797	6.09533707692834	5.86334237471586	21.6784582949113	11.9711615383494	9.88550255858196	5.99090761446857	0.999536441049014	Intron (ENST00000654523.1/101927704, intron 1 of 3)	MIR3663
cluster_1	chr10_117240152_117242058	13.5099697911022	6.51988887840604	3.72662407316259	3.37018466734022	11.9814780222286	6.74909751977187	3.77457001265976	3.48294551640636	0.999678380336077	Promoter (<=1kb)	SLC18A2-AS1
cluster_1	chr10_117346485_117347312	25.1436146532988	1.60021836507748	1.36408791937892	0.87460434889543	25.3566534809646	0.745627930783513	0.665984565720229	1.35854426965352	0.999939420904099	Intron (ENST00000334464.7/118987, intron 1 of 4)	PDZD8
cluster_1	chr10_118594180_118594868	28.6997139712169	14.4211244523651	9.28909773942245	6.00083527469825	31.7731272664071	13.4036047171121	10.5361567828743	4.85166963704657	0.99974369501346	Promoter (<=1kb)	PRLHR
cluster_1	chr10_11936160_11937247	11.7147250717415	1.56096013565794	0.332340057850297	2.03491727205396	11.5983588349436	1.42086381579023	0.422230419568571	1.81151989331574	0.999888479265132	Exon (ENST00000356352.6/26019, exon 18 of 21)	PROSER2-AS1
cluster_1	chr10_119489504_119490169	12.6563454271089	4.21422695324587	3.01467031011604	2.10369249013043	14.1275537571191	6.68248518378432	4.86469203395084	1.81928555443115	0.999562824769172	Distal Intergenic	RGS10
cluster_1	chr10_119686523_119688471	19.9113499992536	7.85221493948336	6.10516687159111	6.81568622515099	19.5517011036664	14.8347704973428	14.6133697835308	6.8710154173663	0.978731201103411	Distal Intergenic	BAG3
cluster_1	chr10_121459401_121460440	7.475805363652	3.6992479935376	0.759740662699338	1.03314845081148	8.70315949390405	4.51361158963757	1.69514228172856	12.2335390002654	0.736137460801951	Distal Intergenic	FGFR2
cluster_1	chr10_121579554_121581184	23.2738153956766	6.59774645054724	1.79234588583789	2.7627925340367	23.5383775264542	5.70713611007295	3.87758273672367	3.78577251159315	0.999998027646882	Intron (ENST00000358487.10/2263, intron 2 of 17)	FGFR2
cluster_1	chr10_121890989_121891678	43.0742353302144	1.52654704130007	1.45945229882069	1.56514071176776	41.9506758697159	2.34039270219976	1.14684038864192	1.96625773420595	0.999942285466821	Intron (ENST00000693411.1/11101, intron 7 of 11)	ATE1
cluster_1	chr10_122342212_122342977	15.3622782117341	4.1227501539208	1.0311274715228	3.0271490512362	19.8295705662171	3.22089048984081	3.54759519796834	3.98890868412258	0.999819959354231	Distal Intergenic	BTBD16
cluster_1	chr10_122875785_122876769	12.1409780721099	10.9707351642493	1.62468328061911	1.69459993839159	17.2440717470845	4.9347005590312	2.55059076882895	1.02881430093291	0.991130186177784	Promoter (2-3kb)	FAM24B
cluster_1	chr10_123117571_123118483	12.4060731108088	4.61340549753992	2.207177023269	2.90877975952416	16.5443913366085	3.20514166393472	1.47842821142043	1.71381086226355	0.99981098445308	Distal Intergenic	HMX3
cluster_1	chr10_123147816_123148200	28.1221597327974	13.2534167252821	2.51084311023411	3.03327060196146	25.7588798190992	11.2098369156752	5.77492976579034	5.29774329784485	0.999595133663163	Promoter (<=1kb)	HMX2
cluster_1	chr10_123150915_123151798	30.5234178197816	11.0384076440384	3.83920166769909	4.30673656910291	27.2036229344539	8.91233573570069	6.88640330154719	2.88506997763861	0.99991657542244	Promoter (2-3kb)	BUB3
cluster_1	chr10_123459163_123460221	13.4697986040794	2.40998320551928	2.90034394001075	3.29063039138836	18.624774504164	2.34495445190207	1.47306654084166	1.06716601881831	0.999437149144151	Intron (ENST00000448347.5/105378531, intron 4 of 4)	LINC02641
cluster_1	chr10_123972482_123973372	10.5732627801709	2.89961069107664	3.57584587899791	5.78407833395481	14.1252722129895	4.44018595376342	4.49196384074351	3.04520477844367	0.997338644033325	Distal Intergenic	CPXM2
cluster_1	chr10_124010652_124011364	26.1857375044154	8.24345363792632	5.45663890044551	2.12501003501809	29.1373569466943	8.12798536227583	4.69826763880728	2.92125764902247	0.99998452113538	Intron (ENST00000346248.7/51363, intron 7 of 7)	CHST15
cluster_1	chr10_124403409_124404007	14.5442653317746	5.75880133699695	3.31982755170873	5.28358385715496	13.0650738226352	5.13511954083665	4.77425221871686	3.67276429930564	0.999859047224174	Promoter (<=1kb)	OAT
cluster_1	chr10_124449809_124450490	23.141928962735	7.64255404469971	5.37272705483549	10.2363958996331	20.1278039548521	9.93797999164939	8.21776195813909	8.91279002874725	0.999044980472362	Promoter (<=1kb)	NKX1-2
cluster_1	chr10_124469702_124470629	39.6481894031163	8.90248055089267	2.77805443413701	2.01398920477147	44.0868598207069	6.86736993540887	6.50548502353952	0.936158478529447	0.999990764573004	Intron (ENST00000368842.10/64077, intron 1 of 6)	LHPP
cluster_1	chr10_124565471_124566199	15.3614216232781	9.00767714800267	1.39660520436166	2.14990047677526	23.9409622281189	8.00271926935637	4.28983246453226	4.73524867632608	0.998160075147383	Intron (ENST00000368842.10/64077, intron 6 of 6)	LHPP
cluster_1	chr10_125047997_125048861	18.2360509042357	7.70074515755681	5.60948415011992	5.33076032517394	17.6702527314873	8.39123540120755	9.45170182870311	5.17273980571514	0.999625942011692	Intron (ENST00000337195.9/1488, intron 2 of 10)	MIR4296
cluster_1	chr10_125134987_125135861	13.4934912727993	2.14292739101577	1.4380317863765	2.69303668662595	10.8297284730697	1.58738500986126	1.58563533851415	1.19519150630044	0.999559189199689	Promoter (2-3kb)	CTBP2
cluster_1	chr10_125151598_125152507	46.3440296700049	7.29555098271369	1.78231484670285	1.10295803211756	43.2009191905813	4.35880467760246	3.64021433873379	4.37894830589511	0.99997953610065	Intron (ENST00000337195.9/1488, intron 1 of 10)	CTBP2
cluster_1	chr10_126881742_126882662	12.037157604601	6.38473350203795	1.71725199729224	1.05741073909141	20.9708706421403	5.4784467063043	2.07597080739984	1.94300436914503	0.998001080009547	Distal Intergenic	DOCK1
cluster_1	chr10_127735901_127737829	14.9157645439618	5.95724743823834	2.43935210374281	2.18371637817601	17.2396104921308	5.24029488688441	3.63466072425204	2.26788634407769	0.999980895571585	Promoter (<=1kb)	FOXI2
cluster_1	chr10_12774250_12775063	8.00108224476206	3.5942341227263	1.42005641391792	2.20878539333752	9.43228456546662	2.94770947894735	2.47784083158042	3.61162725053383	0.999762831279904	Intron (ENST00000619168.5/57118, intron 5 of 10)	MIR548Q
cluster_1	chr10_128047037_128047863	17.2018983087069	4.82145557671848	1.58281833685163	1.24324682602406	16.6922875871781	3.92805403621092	2.44734584130041	7.02652016982726	0.999436060014551	Promoter (<=1kb)	PTPRE
cluster_1	chr10_129888921_129889620	12.2542288192995	5.07355576321155	3.74466800899448	1.85491369124899	13.6462012079259	4.55289091880576	3.59202146743872	4.66723924248412	0.999912042561359	Intron (ENST00000440978.2/253738, intron 6 of 16)	EBF3-AS1
cluster_1	chr10_1309594_1310891	26.4502381835313	3.19717396679882	0.9886045614665	1.12873556869147	37.4566509112145	3.81682033090406	2.24798530182683	2.84927327142992	0.999820475632868	Intron (ENST00000381312.6/105, intron 3 of 9)	ADARB2
cluster_1	chr10_131890855_131891889	10.2591648665328	1.77073150917277	5.03287603412824	4.18927947323581	8.80059595826313	2.9590179081414	2.90866223897338	1.86638640584176	0.991540066904828	Exon (ENST00000634373.1/ENST00000634373.1, exon 1 of 2)	PPP2R2D
cluster_1	chr10_132001146_132001958	15.995931019569	2.12276371255491	0.367465065824116	1.2355538221973	17.7234554743541	2.39052044487593	2.09743908527045	1.44842684624382	0.999986037146599	Distal Intergenic	BNIP3
cluster_1	chr10_132006912_132007781	14.5243300830122	1.41546261722321	1.15361630463875	1.36177274059017	14.5317175289664	1.57980505403998	1.72624750582846	0.656701780337492	0.999954081666439	Distal Intergenic	BNIP3
cluster_1	chr10_132037266_132038048	13.6094435069797	5.76760224451008	2.65180185782892	5.2920431552018	17.8318872209752	4.35109210530324	5.45375357422778	6.71449177956355	0.998818656075042	Promoter (<=1kb)	JAKMIP3
cluster_1	chr10_132163061_132163938	22.8622454168192	6.16847571874029	2.80659287207476	5.98515362269227	29.2237943682443	4.94631871806117	4.83385384320454	6.23945767949557	0.999784693360231	Promoter (1-2kb)	JAKMIP3
cluster_1	chr10_132335197_132335822	35.772699820352	6.08359851832481	2.76503926687587	3.89472107107701	25.2551459209063	9.76332509873323	3.51388872977951	2.40477914720854	0.999325787009207	Promoter (<=1kb)	LRRC27
cluster_1	chr10_132388887_132390036	10.5817792013138	5.27752720807476	3.00218607111467	4.2176429484224	10.1500612579647	5.76863617708457	4.58902053716079	6.02433054018068	0.999153533549071	Distal Intergenic	PWWP2B
cluster_1	chr10_132407816_132408818	21.3933516381031	11.5459345083812	5.39176397888639	3.93025376769114	23.101490788352	6.49165640406431	5.63093583700607	8.78229054823751	0.999606646063796	Intron (ENST00000631148.2/170394, intron 2 of 2)	PWWP2B
cluster_1	chr10_132418851_132419782	17.6194387125176	4.59528146774249	4.16677664541403	3.66361450773344	23.6963756418996	10.1925359792415	6.49177041224339	6.47532725012876	0.998957112513832	Exon (ENST00000428814.1/ENST00000428814.1, exon 1 of 2)	PWWP2B
cluster_1	chr10_132477291_132478000	11.0432546855992	8.29684519589817	3.52078920622782	2.231833703172	7.583363100001	9.57418269835443	4.54027108444008	1.67924390362179	0.844937617028785	Distal Intergenic	LINC02870
cluster_1	chr10_132517982_132519468	20.5900158681481	9.45939326242289	4.72965265857201	4.62524913413421	22.5942087595107	9.98839690384061	9.57733676362159	6.36351424292	0.999808166333974	Promoter (<=1kb)	LOC107984282
cluster_1	chr10_13271364_13271997	17.0286652267978	4.6585040935743	1.42408625109845	2.02492409386272	14.5344160939071	5.61968075862651	2.08320118073042	3.01416653949985	0.999910478662201	Distal Intergenic	PHYH
cluster_1	chr10_132971459_132972617	9.5026136687895	2.94184419994363	1.9948502416366	1.67705387937318	8.98329793745451	2.34439923847392	1.29044112656955	2.4828402410138	0.999953485485735	Exon (ENST00000461291.2/399829, exon 2 of 3)	LINC01168
cluster_1	chr10_133100831_133101640	25.6405897738721	22.4784244527561	15.8283183834156	9.53207117828781	29.0717842095808	19.5994803193	18.847734439995	9.21952604737099	0.965369715579288	Promoter (<=1kb)	ADGRA1
cluster_1	chr10_133219592_133220318	20.783414344115	5.6219588464254	2.39097705664363	2.27514525846081	19.9594017627582	3.76194374365548	2.30792403944913	1.02181711275443	0.999984631470773	3' UTR	KNDC1
cluster_1	chr10_133236852_133238492	12.7123806698516	7.38060115197903	4.7806445926739	3.83157239586069	13.5593592094769	8.23528234685524	6.24389057114841	3.92944050506444	0.999063576711815	Promoter (<=1kb)	VENTX
cluster_1	chr10_133246933_133247832	15.8552294104056	7.53719850263402	2.92548299125493	1.95366837509908	15.5871008099274	7.28630645842226	2.68646168915032	2.19943278605343	0.99961279787533	Promoter (<=1kb)	MIR202
cluster_1	chr10_133257381_133258234	19.7785169120968	5.66619009297018	3.60860028124719	3.20213863075765	16.7108716320374	7.77621294768408	5.32045137942331	5.41833428627848	0.999812442228443	Exon (ENST00000611956.1/ENST00000611956.1, exon 1 of 1)	ADAM8
cluster_1	chr10_133276367_133277412	18.4749607605468	5.55149576039592	3.95986454547242	4.08532901790788	17.1006196868491	6.98851739602771	5.06039788058588	3.46260326468303	0.999970988511116	Promoter (<=1kb)	ADAM8
cluster_1	chr10_133422779_133423882	13.3446947170037	2.39508504127287	3.55659236166278	4.51610523557634	11.9989587473629	4.4748803009456	4.8452654283642	4.85850428180919	0.998624286765198	Promoter (<=1kb)	SPRN
cluster_1	chr10_13349487_13350323	43.1352414206718	6.33125830688867	6.33919552681774	4.07673571342798	45.9571245327112	9.45898229500175	8.08150441850985	7.81967962214863	0.999965865302192	Promoter (1-2kb)	SEPHS1
cluster_1	chr10_13351344_13351816	35.5144356611894	3.4576243397941	2.90320477589359	3.2260471214422	32.9810684298591	3.30411908945411	2.66016669181998	3.41505714074723	0.999923634453424	Distal Intergenic	SEPHS1
cluster_1	chr10_13808993_13810110	8.7342903047811	3.11386121742549	3.06609597318276	3.88443419575722	10.4664041107915	4.41486884702123	4.84649976268509	6.20913376225406	0.994017343113164	Intron (ENST00000357447.7/55691, intron 4 of 24)	FRMD4A
cluster_1	chr10_13881846_13882876	24.2492859356272	7.03619515790858	2.01268794000966	1.84695288903413	20.5042193977991	11.4713696117532	6.94145881077325	5.04596328108998	0.999035461894115	Intron (ENST00000357447.7/55691, intron 2 of 24)	FRMD4A
cluster_1	chr10_16242680_16243590	20.2697787555732	3.5037336160697	0.954839535901208	0.968901119024073	17.1687359109511	1.91414128489437	1.0813369309568	0.781007183736459	0.999940092998209	Distal Intergenic	LINC02654
cluster_1	chr10_16386647_16387521	15.0854385320896	2.17080239788826	1.00613105471913	1.27309902682828	15.931890006435	0.962725974266357	0.551843953577048	0.977713735288674	0.999966652906975	Distal Intergenic	PTER
cluster_1	chr10_19488551_19489439	21.0528849955888	5.00652948884442	6.21083418072671	3.26060300721302	15.7191726794532	6.40820627042193	4.46608309909262	6.37367693500864	0.998671018286546	Promoter (<=1kb)	MALRD1
cluster_1	chr10_21281967_21282599	20.927482350814	4.1746215354016	1.48395429215062	1.19731319282001	33.3585783227213	4.98966583873906	1.69035717927717	1.65577197676379	0.999540512083369	Intron (ENST00000675702.1/10529, intron 1 of 8)	NEBL
cluster_1	chr10_21473119_21473864	15.1385141647969	2.39416890278744	1.41223032976013	1.32535855507465	19.6445222787102	4.71367005569264	4.25216130219	1.35584487938498	0.999804603581157	Distal Intergenic	MIR1915
cluster_1	chr10_21751307_21752433	20.7318343207507	3.32270985406014	1.85003905107736	1.51346140246552	18.6753981561409	4.43392275468261	1.87533375119582	1.77442448955207	0.99998044202743	Distal Intergenic	MLLT10
cluster_1	chr10_2201584_2202750	15.3809510211668	3.37187474238699	1.01418810707487	1.29709141955373	15.0676598301229	3.42916939226089	1.94624537255384	2.74956639325542	0.999993993715338	Distal Intergenic	LINC02662
cluster_1	chr10_22690638_22691577	11.3199079965955	3.30866509097464	1.43583695113661	1.05346901650748	14.2656881621539	1.58154410468544	0.225626940524847	2.2461819106721	0.999862243583541	Intron (ENST00000376573.9/5305, intron 1 of 9)	PIP4K2A
cluster_1	chr10_23198827_23199880	12.1085875256548	3.98192323910885	2.73904583466055	1.39184849292765	12.5015033221843	3.51259233466701	1.33912809303536	2.9397950275943	0.999967762022637	Distal Intergenic	PTF1A
cluster_1	chr10_23280273_23281382	7.18864582327662	1.02311656089811	1.34748715890925	1.97297427228915	10.0252377736307	1.87278307769358	1.88953325515786	2.28278563986926	0.999005777042228	Intron (ENST00000376501.7/256815, intron 8 of 14)	C10orf67-AS1
cluster_1	chr10_23702818_23703405	20.5512894917067	3.57755443948417	3.46308478312509	4.37661500156331	16.169419489926	4.59705942623807	3.9523339784914	3.19611863591628	0.999550967348565	Intron (ENST00000376462.5/56243, intron 1 of 18)	KIAA1217
cluster_1	chr10_24552188_24552873	35.0445372408278	2.12144444177994	1.09225252625531	1.2068336411586	34.2364989027117	2.48481466471003	1.51942826053356	1.98960105644001	0.999964118514251	Distal Intergenic	KIAA1217
cluster_1	chr10_2477012_2477665	16.8240542397729	11.8755754162504	4.73086570550681	3.17770238940806	20.2374459067721	3.66951828326524	2.86932011941981	0.690038616563947	0.996262813195213	Intron (ENST00000666064.1/ENST00000666064.1, intron 1 of 1)	LOC105376350
cluster_1	chr10_26438004_26439173	8.89982086311697	3.84377053673587	1.49287378856588	1.50394422582552	7.24971519208383	4.10641283944677	1.9612105991498	1.45400298845595	0.99909189064539	Promoter (<=1kb)	APBB1IP
cluster_1	chr10_26621978_26622800	13.0076232140344	6.47497436069237	3.08483223465351	2.25486138473523	8.53193841141109	4.02004469746761	2.16050217614809	3.44672659254742	0.994260626882573	Promoter (<=1kb)	LINC03028
cluster_1	chr10_30359595_30360397	19.9794492898764	10.2677202439335	4.78844060504248	4.5751871140965	26.6044459800364	9.2831637532669	7.19841327957972	5.26591325521056	0.9997349083162	Intron (ENST00000488290.5/55149, intron 9 of 16)	MIR7162
cluster_1	chr10_30522499_30523307	17.6835025274805	20.043860633846	4.11945476319938	0.916110329519247	26.2391830948928	8.1555649743513	3.18397664446474	0.565023611003248	0.969298819394663	Distal Intergenic	LOC105376478
cluster_1	chr10_31036273_31036765	23.2364217509536	4.8105188403248	3.87774925864022	3.28601491202344	21.8536065967905	3.20767000395422	2.0079144317417	1.93861162881918	0.999931828086798	Intron (ENST00000658872.1/105376481, intron 1 of 2)	LOC105376481
cluster_1	chr10_31754912_31755409	17.2237953551997	6.25828795981367	0.997721027172605	3.94409227320549	16.740507492169	5.29489188355611	3.94654307619597	7.97851588292573	0.998993868544153	Distal Intergenic	MACORIS
cluster_1	chr10_32139078_32139980	15.4387028665885	4.74610211575745	2.3480600425439	3.60100500865329	11.8030975090734	3.16397257976878	2.1532315845026	8.2613797157244	0.992313889233047	Distal Intergenic	KIF5B
cluster_1	chr10_32266856_32267471	18.9653375880114	2.70419187764811	2.21174558723089	0.816220105370537	21.4067002768871	2.34729191658258	1.39483244306451	1.57140445301925	0.999976440071541	Exon (ENST00000628416.1/ENST00000628416.1, exon 2 of 4)	EPC1
cluster_1	chr10_34426941_34428051	27.7579202886296	23.5315215295821	4.30529846780186	0.938273944498769	24.9371660104975	13.9787137369437	9.00772774498365	4.34979824705519	0.971710231069612	Promoter (<=1kb)	PARD3
cluster_1	chr10_35593923_35595068	11.8313152192267	1.18867323425225	2.00888623478205	2.0683338723721	17.2842083422784	1.60660042822367	1.58591464298902	3.33987099081229	0.998887610978102	Distal Intergenic	GJD4
cluster_1	chr10_3668344_3669093	18.3979667463645	7.94659417538569	1.84398602670379	1.03171308670052	16.339928071628	5.47288936376461	3.17233865568204	5.41135929582128	0.99954582815998	Distal Intergenic	LOC105376363
cluster_1	chr10_42816417_42817291	12.466132891214	1.98961429130783	3.41942296297874	1.84945828830143	13.611963108719	0.908697366619581	1.10402266080005	1.16509969472809	0.99954675299894	Exon (ENST00000374518.6/9790, exon 14 of 23)	BMS1
cluster_1	chr10_42932648_42934376	13.5091774940463	9.06021858984912	9.05916119542857	4.90734769924688	14.6011926368081	9.26557558968474	8.36116750785366	4.99388008988845	0.992154923526754	Distal Intergenic	LINC01264
cluster_1	chr10_42951494_42952727	21.7546806379887	7.63458938297176	5.16156811044221	2.97362876036317	24.5637502555554	7.67451898764578	5.55504745001243	4.61826282210255	0.999990624977743	Distal Intergenic	LINC01264
cluster_1	chr10_43026091_43027135	10.6578778007475	3.59337305593276	4.44793729934507	2.36924210901018	16.2035625111409	4.63350995098993	3.80757735224769	3.61677692206933	0.998562371130676	Distal Intergenic	MIR5100
cluster_1	chr10_43202217_43203384	34.9935735419188	7.69322018001348	4.06498675534223	3.40189095958053	48.4454596400481	13.686001305281	13.2462284020516	9.83405508292014	0.99931113338956	Promoter (<=1kb)	RASGEF1A
cluster_1	chr10_43401635_43402058	18.9729224379294	4.41017122815892	2.51106340990849	1.48216732661704	34.0847993613831	5.26045181863179	3.05187250360895	2.34419045908278	0.998544080411217	Intron (ENST00000357065.8/3185, intron 1 of 3)	HNRNPF
cluster_1	chr10_436247_437588	44.3448808166628	1.20659975945666	1.64270160103403	2.09118385656679	57.2016459868464	0.863704336206408	0.469550225643163	0.589672399633148	0.999833389542851	Exon (ENST00000425723.2/ENST00000425723.2, exon 1 of 2)	DIP2C
cluster_1	chr10_44316297_44317118	20.1528136362648	2.6627137293148	3.54536966309148	1.48441509536749	23.430654103445	1.95233039117728	3.2168532760184	2.82636080866471	0.999850244400618	Distal Intergenic	CXCL12
cluster_1	chr10_44370455_44371407	27.6758475632049	2.97035370030463	3.51404466712623	5.51586419083028	30.9148766792514	1.83988809146656	2.47250934332499	2.22175281007928	0.999744779959958	3' UTR	CXCL12
cluster_1	chr10_44382170_44382857	15.8163657643064	4.38368845213481	3.10954021382733	3.95321765114733	19.1195072777411	4.56459599962523	5.12427629511096	3.81612901697742	0.999910461821337	Promoter (2-3kb)	CXCL12
cluster_1	chr10_46540983_46541676	22.8767655081027	12.3410070701737	12.1951777913047	4.31459000181235	19.9922397003729	10.6017184337307	9.97752654809541	3.66377968659652	0.991169102311789	Distal Intergenic	GPRIN2
cluster_1	chr10_46555403_46557753	30.3355226394095	17.2850504705092	22.2237052731319	10.6848887160895	28.6796113462513	13.4979888580231	11.7009150606003	6.42552711533723	0.98021779303409	Promoter (<=1kb)	GPRIN2
cluster_1	chr10_48671057_48672493	8.06538415506227	4.47491019615428	7.33453848894227	2.4699098691587	8.46724129521221	3.51108203212213	2.71034013742579	1.89328392881366	0.952480541424254	Exon (ENST00000440750.1/ENST00000440750.1, exon 1 of 2)	WDFY4
cluster_1	chr10_49689906_49690794	13.0043815634391	2.90064728167588	1.78803282511658	1.59570435811765	16.8000254915133	2.35080362083828	2.0241559518964	1.78305392863089	0.999923469631355	Intron (ENST00000374113.3/282966, intron 1 of 1)	C10orf53
cluster_1	chr10_51083212_51083970	15.7605482274885	2.64375789065807	2.28446633277224	1.99406062045526	11.4970105663204	2.69317343463347	4.7346797958271	3.20590939232722	0.998416928223638	Intron (ENST00000401604.8/5592, intron 1 of 17)	PRKG1
cluster_1	chr10_51267913_51268873	21.0993958246141	1.86706746020813	2.2155958402813	1.63728120859234	28.9662305366372	0.486564079946822	1.13070225981516	0.96998510483848	0.999661889026568	Intron (ENST00000401604.8/5592, intron 2 of 17)	MIR605
cluster_1	chr10_52018687_52019630	10.2114721252265	8.89031603707665	3.10593818560743	1.92974798848663	7.27278101258986	6.17450625881221	3.38622627344364	1.65235743694491	0.909831914268681	Intron (ENST00000401604.8/5592, intron 5 of 17)	PRKG1
cluster_1	chr10_52038962_52039877	22.8070730058502	1.25944335656383	1.09821418836047	2.57606035496684	22.8713623624461	0.840592316299308	0.601068210271978	0.856922112866311	0.9998802858014	Exon (ENST00000691193.1/ENST00000691193.1, exon 1 of 3)	PRKG1
cluster_1	chr10_52040521_52041128	26.5053442725199	1.29215356892739	0.707607059388129	1.59605938301961	19.6084769358668	0.66123146591535	0.43939000525849	1.58232269774707	0.999440216469501	Intron (ENST00000401604.8/5592, intron 5 of 17)	PRKG1
cluster_1	chr10_5293880_5294596	22.6241314271779	3.67960741543878	4.31572956053432	2.23397858358855	19.0675931943123	3.52962491641511	2.77001331199911	1.79373394901993	0.999802008782387	Distal Intergenic	LINC02561
cluster_1	chr10_52965861_52966535	16.7392335420011	5.86858629387641	7.5139281552404	3.63487113152363	23.1014843488643	3.78337519892864	3.94506730893919	1.92588388863068	0.99850929191578	Distal Intergenic	LINC02672
cluster_1	chr10_5466123_5467110	18.0072843432523	7.90400039218064	3.72465981653053	3.49346747461321	21.1945493620257	4.52998515085951	2.59642881899248	6.44200771093123	0.999773266838791	Distal Intergenic	NET1
cluster_1	chr10_57222193_57223068	31.6661032210957	7.57816879539868	6.21531631155642	3.172048725669	28.228850126731	4.04551395599994	2.33996138455005	1.87692178689283	0.999847033937146	Exon (ENST00000690550.1/ENST00000690550.1, exon 1 of 3)	MIR3924
cluster_1	chr10_58229732_58230464	14.161450191464	5.94484611326066	3.63886926504347	1.3736512992227	11.0274437033528	1.53439891694872	1.74605611458602	1.64519037812896	0.998002722911035	Intron (ENST00000373935.4/253430, intron 2 of 5)	IPMK
cluster_1	chr10_59847001_59848171	20.58215119795	14.2085743972209	7.74137044086864	4.18034983085483	24.1991356772882	3.11599610723676	1.36980004682674	0.659415148202772	0.993358654758729	Intron (ENST00000263102.7/8030, intron 2 of 8)	CCDC6
cluster_1	chr10_60732791_60733762	19.5880490191193	10.9543486430406	7.83012390269432	5.6222867840614	24.1092049909759	9.61451364864747	8.875882584843	6.50661499928446	0.999786067601789	Promoter (<=1kb)	NA
cluster_1	chr10_6086345_6086781	18.0711902816544	3.24561849165405	3.01444568346984	12.2953267356635	19.4021282268027	7.18266112388752	5.83535228938602	7.3370639556724	0.986619149826927	Promoter (2-3kb)	RBM17
cluster_1	chr10_6108524_6109284	18.2866698845942	2.98024816817727	1.45450187177937	3.51739886511782	25.3350697197752	2.24723002722242	2.51454748169724	2.37641564547792	0.999660385542693	Promoter (<=1kb)	RBM17
cluster_1	chr10_61985963_61987315	8.08808975871371	1.47542131233886	2.09096607911055	3.37228722080216	7.48860133749151	0.729859900256367	1.41175140078308	2.24824513402739	0.996108709196191	Intron (ENST00000644638.1/84159, intron 3 of 4)	ARID5B
cluster_1	chr10_62924215_62924923	22.4638765538465	3.7252421923976	3.21362911674856	2.33612575347511	25.4156467280321	4.88523508424389	3.55102951217599	2.80372265705106	0.999981709019231	Distal Intergenic	LOC107984012
cluster_1	chr10_63504050_63504826	10.7610261497616	7.42884184444397	2.09354555555822	1.71549869334637	9.90162557776984	1.85327970214663	1.41192992528036	2.29590226615858	0.994550175545575	Intron (ENST00000633035.1/221037, intron 1 of 3)	REEP3
cluster_1	chr10_63514836_63515797	15.4615569288083	1.98923262870472	0.872366955462786	1.75550184265552	12.2724905137633	2.23652046644228	1.73451467362698	11.9057693871813	0.962546736011226	Intron (ENST00000633035.1/221037, intron 1 of 3)	REEP3
cluster_1	chr10_63713042_63714042	33.5061934674484	4.88001914881101	12.1344160785698	16.8622082391385	31.7830279627658	5.32205265951676	14.0081773253815	9.97973350911322	0.988175394023689	Intron (ENST00000444770.1/ENST00000444770.1, intron 2 of 2)	LOC101929846
cluster_1	chr10_6647723_6648369	13.4991743030369	4.59374203515351	2.94552069509981	3.79760398214737	12.6841810254974	3.79926242542693	2.41088207631168	2.17398163776362	0.999932291409725	Distal Intergenic	LINC02648
cluster_1	chr10_67861442_67862592	21.4851309368376	2.18600771213465	2.3719976788438	2.22566135069676	26.5927356933733	2.4775228549835	0.711303075234008	2.06157032748012	0.999886031619369	Distal Intergenic	SIRT1
cluster_1	chr10_69222151_69223010	11.5633000071289	2.7400980184783	2.74635748961503	2.91556957501019	11.9761886901414	5.23711755532454	2.82157874547348	3.07786674005993	0.999903770596502	Promoter (1-2kb)	HKDC1
cluster_1	chr10_69329473_69330303	29.6587828857275	3.01423387018189	2.02366804381517	1.79615771458332	32.7648053070465	3.86550271253823	1.3909938440943	1.21612209829012	0.999983152149927	Intron (ENST00000436817.6/3098, intron 4 of 20)	HK1
cluster_1	chr10_69375420_69376278	21.0218254046337	4.41739324377174	2.12640257435242	2.29999779505898	19.42851010505	4.89542978173601	2.75625170881813	17.5501480469155	0.967967876336461	Intron (ENST00000436817.6/3098, intron 10 of 20)	HK1
cluster_1	chr10_69389704_69390507	20.5818757357621	4.59553960167059	2.07583553445213	2.03974324522437	15.4768676447705	3.92920483083801	2.70388666760208	6.86560986877288	0.998739311534823	Promoter (1-2kb)	HK1
cluster_1	chr10_69392228_69392924	18.8531736130739	9.9915462333042	6.07722143541092	8.06553839228866	17.0732803693146	6.38330558116298	6.90269752283586	7.36631166020894	0.999493495329153	Promoter (<=1kb)	HK1
cluster_1	chr10_69507638_69508268	21.4445040152982	7.69807688379606	4.36451773293107	3.06927904587849	18.490075178269	7.82319157240611	4.92165115971077	7.43694204841384	0.999766606228936	Promoter (1-2kb)	TSPAN15
cluster_1	chr10_69574502_69575211	27.3430414037996	8.64298437806104	3.99902281430618	4.64922366032318	24.0077421846005	10.8738768542938	7.91691066467515	6.02507132659965	0.999888085217874	Promoter (<=1kb)	LOC101929021
cluster_1	chr10_69801128_69802228	15.0397239982296	8.14375733393444	3.98460187690069	3.79083496932271	19.0049995806399	9.02756834965815	6.34843275116161	4.42906073147605	0.999449469381683	Promoter (<=1kb)	COL13A1
cluster_1	chr10_69867536_69868429	21.834247733125	7.31735847572444	4.43343889776093	1.4777052882547	26.5184402168246	3.12617224846625	1.89534741352482	1.88801484889832	0.999884812034147	Exon (ENST00000357811.8/1305, exon 3 of 38)	COL13A1
cluster_1	chr10_70264989_70265571	15.1582997398839	3.24822578991812	2.24203815149918	1.93548251748572	19.0865318398489	3.01790967170435	3.06884023755953	4.60964019204737	0.999798840508652	Intron (ENST00000277942.7/64106, intron 2 of 3)	NPFFR1
cluster_1	chr10_70368762_70369574	13.8213880395559	4.42882346215682	1.97757964611649	0.861783726427566	23.7914352554504	2.35571809534367	1.33564438153468	1.37632050483878	0.998888604156286	Intron (ENST00000395011.5/55222, intron 2 of 3)	LRRC20
cluster_1	chr10_70387265_70387916	20.8934507699499	2.065757491636	3.15902129579143	3.89345589338707	22.5531308301021	4.62066967775317	2.22408271859906	4.27473365269375	0.999848480625488	Distal Intergenic	LRRC20
cluster_1	chr10_70440751_70441721	13.7648869721953	7.18493701387375	4.95134817080327	6.17818499830398	13.68000377337	7.88606219800716	3.7589873520864	3.5595758440387	0.999098771807249	Promoter (<=1kb)	NODAL
cluster_1	chr10_70441876_70442884	31.2863754552229	1.69182973839702	2.4202973365805	1.58479582598384	22.1409091549553	3.45763831346572	1.15109623951964	2.49091524322517	0.999291311737296	Promoter (<=1kb)	NODAL
cluster_1	chr10_70455188_70455748	35.4736319447537	4.20048644309798	1.6068360627564	1.79081400259647	30.8586802343645	2.20494890165036	1.55939193465348	1.88057293833597	0.999926859156123	Distal Intergenic	NODAL
cluster_1	chr10_70493610_70494305	16.1088046194196	5.71548093583237	2.96322991496776	2.61833761232527	11.249010317913	5.50331924924106	3.21294590357692	1.7903853741892	0.998506795660323	Intron (ENST00000263563.7/27143, intron 1 of 19)	PALD1
cluster_1	chr10_70508815_70509438	10.1485886619586	4.7903604715262	3.14218740692296	2.5419227475913	13.8209874316406	5.47775873541789	5.15975441617326	4.02070417993035	0.999243829475426	Intron (ENST00000263563.7/27143, intron 1 of 19)	PALD1
cluster_1	chr10_70558981_70559744	11.7669405325162	6.30361683378815	2.80032852903362	3.74794006081217	13.3501548078578	5.44422168675261	2.77750741142862	4.50976363554544	0.999833550553278	Intron (ENST00000263563.7/27143, intron 18 of 19)	PALD1
cluster_1	chr10_70624192_70624992	23.9580393057799	1.37569287486799	0.859529939276003	1.68743387894872	17.8357258799268	3.19455218588315	0.987467156339617	1.02965485921965	0.999622880867217	Intron (ENST00000697571.1/27143, intron 20 of 20)	PRF1
cluster_1	chr10_70760867_70761634	10.2507292974352	5.43796928947016	4.48291686896203	2.36265222809325	11.8316978709354	6.43063517851556	4.96115331316989	2.64165936291785	0.998605507456011	3' UTR	TBATA
cluster_1	chr10_71269407_71270691	15.8797254883973	6.0894862591193	3.32601241785945	4.20618137092458	19.9134353733111	5.75734040204626	3.97602810743753	3.60048451375668	0.999953026901201	Intron (ENST00000335350.10/219699, intron 1 of 16)	SLC29A3
cluster_1	chr10_71278563_71279275	13.0483195194945	2.51170627048901	2.15301692301043	4.38697801976106	12.6051842031033	4.25502153520148	1.99084704068104	2.84003959332039	0.999678459554734	Intron (ENST00000335350.10/219699, intron 1 of 16)	SLC29A3
cluster_1	chr10_71344207_71345252	23.0496098652279	4.80094757730812	3.08718580318449	2.40602179691991	23.5692679609403	3.00735769961204	2.67405650277524	1.51340418883652	0.999979775092521	Promoter (2-3kb)	LOC105378353
cluster_1	chr10_71657513_71658710	11.6150109392157	9.39230580067843	4.81086132953912	3.51999201202233	15.7990740245614	13.0988086161838	7.07335746597193	2.22829126970835	0.936536287595949	Intron (ENST00000224721.12/64072, intron 14 of 69)	CDH23
cluster_1	chr10_71805526_71806490	14.6732254612287	7.16267492701936	3.30686106109859	4.47601513047833	19.2955689009091	4.18116153045855	3.41249209155132	5.65596793743215	0.999535894963689	3' UTR	CDH23
cluster_1	chr10_72248254_72249220	16.1927848321505	3.2095260812078	2.43310315141197	3.06452912274118	13.8003884841568	4.86202540154647	3.26770919359711	13.9607753451233	0.952689111072596	Distal Intergenic	DDIT4
cluster_1	chr10_72886411_72887538	10.111443511299	4.44003337829653	2.59737639930463	3.01579579208535	9.74537967313467	4.93090486900373	2.81198089676447	2.72837645115091	0.999951028058696	3' UTR	OIT3
cluster_1	chr10_73591173_73592331	19.9996842049278	15.4111956018586	6.17785810286171	6.13150094002472	16.4704751847067	14.1916385816019	9.11585974055407	4.3276731552123	0.960827266218918	Promoter (<=1kb)	USP54
cluster_1	chr10_73940523_73941316	12.8170575131272	13.4925972162791	3.99629828420713	1.99172084091746	13.6724327016157	10.0755376718882	5.3187728290433	4.21157026106423	0.926353654077586	Distal Intergenic	C10orf55
cluster_1	chr10_74730125_74731106	8.11801196137273	1.73672594043079	1.78047837905704	1.90139773012567	12.2843949192338	2.31861875743747	0.705614168304934	1.98912675499023	0.999140505782547	Distal Intergenic	KAT6B
cluster_1	chr10_75043310_75044244	11.0244828492631	2.89704737616859	1.74804444975698	0.995588627237586	14.3862766237677	1.06980906082794	1.5436011604774	2.14873422574645	0.99978939107383	Exon (ENST00000338487.6/338599, exon 3 of 4)	KAT6B
cluster_1	chr10_75099866_75100923	21.3484292618473	8.52064968974481	6.60098908341349	6.15357930730688	25.0730398841265	10.5611699901962	6.92898042152475	6.91294695171467	0.999969744939492	Promoter (<=1kb)	SAMD8
cluster_1	chr10_75187756_75188578	13.1247264005536	4.18911300313222	1.19479826953588	1.43780639717667	15.0260061765111	1.94503805301483	2.18430079052132	1.23108874446464	0.999973763626544	Distal Intergenic	VDAC2
cluster_1	chr10_76082714_76083507	25.6339851995023	3.0160825145742	2.21469835003522	2.51917039678185	21.3523203825837	3.41759967219368	2.01962773189609	1.49062605324634	0.999874657778038	Intron (ENST00000611255.5/83938, intron 5 of 6)	LRMDA
cluster_1	chr10_76103119_76103764	17.1105803943941	2.37272510739252	1.88884819705001	5.0666000082632	11.7714993756889	2.66702892350698	1.2948253473287	2.66564036397076	0.996895695519388	Intron (ENST00000611255.5/83938, intron 5 of 6)	LRMDA
cluster_1	chr10_77564717_77565973	13.6530656702312	4.31784543838955	0.966940393521014	2.7744067474492	12.8048396963054	6.10899076718383	1.8842047744889	1.14145247758496	0.999683578309727	Intron (ENST00000639601.1/3778, intron 1 of 27)	KCNMA1
cluster_1	chr10_77709920_77710602	15.9954451009042	4.55503882426539	1.80162163812129	1.3721600347692	20.1416072971863	1.95154469426733	2.27346246704836	2.17929149781715	0.999926639784806	Distal Intergenic	KCNMA1
cluster_1	chr10_77948933_77949767	18.9751172767771	6.08470844487418	1.47320360338032	2.17901241356908	13.7155326647739	3.39185176720803	2.30106690750168	16.8510850101284	0.921756321905719	Distal Intergenic	DLG5-AS1
cluster_1	chr10_79129302_79130095	21.2606886066599	21.0083121425624	7.59342560730499	5.60010047958589	19.9904910625313	18.2484101118208	9.8148870615667	4.78072072100299	0.886186579615773	Intron (ENST00000334512.10/57178, intron 2 of 24)	ZMIZ1
cluster_1	chr10_79487346_79488070	15.742216026824	4.59893703168628	3.3355011853563	3.22518567578214	17.6780112460948	4.39416367279197	6.68556623507464	5.5398585657999	0.999667181966087	Distal Intergenic	LOC729815
cluster_1	chr10_80207208_80207694	16.9235057215301	6.19215357690928	0.634139948491338	2.85082451041769	18.5326042658122	4.79747632320772	3.56477666461312	8.81920287111348	0.998422806823083	Promoter (<=1kb)	LINC00857
cluster_1	chr10_80256592_80257282	16.6696103126781	2.71227277602959	3.04270778936957	3.12500352025601	15.5515341511061	4.06976393703794	3.45975406973186	4.62438077803413	0.999820902324444	Distal Intergenic	MAT1A
cluster_1	chr10_80289435_80290212	9.8063488885268	1.01611372996256	2.66551429505685	3.86718989260635	15.2349318442809	1.77968060866159	2.31824395030133	3.17667862018419	0.995956013874301	Promoter (<=1kb)	MAT1A
cluster_1	chr10_80535780_80536650	9.69044485467576	2.74463801597284	1.09377977203376	2.28876793421861	12.8416251798101	0.788264202838645	2.073485942062	0.982208970853219	0.999543266346968	Promoter (<=1kb)	TSPAN14-AS1
cluster_1	chr10_8296009_8296874	9.15701165255201	4.49893410922754	2.47716276525826	1.22117531842249	9.86652719355623	3.9135867427903	2.08155707166074	1.04526747081115	0.99970930619222	Distal Intergenic	LINC00708
cluster_1	chr10_85492534_85493350	13.1415834911887	2.73732367007128	3.15508630936941	5.67073512595634	22.7387341333624	4.09822882692956	1.82098750272781	2.25098805707447	0.996397163950781	Distal Intergenic	LINC01520
cluster_1	chr10_86261876_86262859	8.99282449395053	3.13978584115349	3.41847766709277	2.47979966542555	9.97603068689728	3.30257398003754	2.2775664502325	2.00578812704505	0.999909909379601	Promoter (1-2kb)	MIR346
cluster_1	chr10_86376843_86377657	19.7228584029168	8.14640329298621	11.0516688014451	5.12109758821657	15.7781245224171	6.7163674078347	5.64672726376516	5.67940309422567	0.993945142134422	Distal Intergenic	GRID1
cluster_1	chr10_86389376_86390287	23.2403950474919	5.93703452874511	6.34675803136207	2.75676618239932	22.150657333891	7.98123345949337	5.91695835279262	3.27359088424535	0.999905990256794	Distal Intergenic	GRID1
cluster_1	chr10_86535252_86535970	15.4907258897332	5.91492555581162	1.85566688266487	2.77282931207218	18.0589842542168	5.40650996500211	3.32087973579252	3.04338220389561	0.999986090969327	Distal Intergenic	WAPL
cluster_1	chr10_86536176_86537069	10.2848829258365	2.71132432969786	1.70851474024535	1.18577419321906	13.6345940853059	3.30460100380966	3.52771100373085	0.888017385088719	0.999722432916228	Distal Intergenic	WAPL
cluster_1	chr10_86631779_86632764	18.9370762627233	4.99418700612433	4.80736552258663	2.47183453525567	22.0067028383279	8.46229316053101	7.13592600630117	3.32256386285656	0.999729251296416	Distal Intergenic	LDB3
cluster_1	chr10_86856996_86857822	14.3401892820108	3.09217722471297	1.30345361568314	3.35380831086029	18.5598106678024	1.83642479629908	3.77565425229121	2.3219876791885	0.999623200270331	Intron (ENST00000638429.1/657, intron 2 of 13)	BMPR1A
cluster_1	chr10_86864922_86865636	15.9384402253168	4.10933301965203	0.896385477241534	2.06211384875274	17.4948197080651	2.13800760874678	3.03103806256711	0.869800419890318	0.999968169160794	Intron (ENST00000638429.1/657, intron 2 of 13)	BMPR1A
cluster_1	chr10_86954053_86954968	23.2256103515546	14.1158599931482	13.4046229834663	8.54044283273586	24.6547549581132	17.999997189479	9.96771912486467	4.97997529241551	0.988350965725311	Promoter (<=1kb)	MMRN2
cluster_1	chr10_87625662_87626846	13.2756112751775	2.53926290858405	0.925874763415946	1.27702949342045	13.7293394829299	1.14464010110623	0.921819290539194	1.22246836723275	0.999977693115382	Intron (ENST00000438082.1/ENST00000438082.1, intron 1 of 3)	PAPSS2
cluster_1	chr10_87915269_87915902	13.1757293506506	7.32435248346767	0.623493401780184	1.39797564119984	16.0160657870657	8.33669231436062	3.87648851802338	5.94172237413095	0.996242176259924	Intron (ENST00000688308.1/5728, intron 3 of 9)	PTEN
cluster_1	chr10_88702977_88703751	19.7804604862691	1.36788930360152	0.975989551935294	0.879680462461491	23.5525066620842	1.21851686512124	1.10395068959892	2.31283155615569	0.999908406134723	Promoter (2-3kb)	LIPK
cluster_1	chr10_88728275_88728935	26.914102069096	1.27180629224638	2.05983648774425	1.940731776688	24.9456022272136	3.02090252243432	1.62861488745819	1.15545444209953	0.999915972527085	Exon (ENST00000441370.1/ENST00000441370.1, exon 1 of 1)	LIPK
cluster_1	chr10_90812676_90813485	21.0433147829472	1.11968670918044	0.520003541124018	0.799206880504857	18.9699899448746	0.755575538466418	0.57668286944989	0.489171682933941	0.999919815729069	Exon (ENST00000685016.1/ENST00000685016.1, exon 3 of 3)	HTR7
cluster_1	chr10_90925338_90926088	23.2416145635252	0.656376951649256	0.482168487033232	0.142573706328961	27.0335705197819	1.2920309644816	0.340317289535034	0.819152724864339	0.999952605292755	Distal Intergenic	ANKRD1
cluster_1	chr10_91744968_91745692	18.3703731474351	2.19103233984486	1.29483474862864	1.7992812853015	18.3849339108191	1.442900114368	1.0597895274469	2.44544797970124	0.999935627912168	Distal Intergenic	TNKS2-DT
cluster_1	chr10_92045450_92046298	12.9633873433866	2.82033090291901	2.57387860788988	3.24071388932941	16.58198694125	5.10598346760803	2.5790173916172	1.67450576150976	0.999797800556726	Distal Intergenic	BTAF1
cluster_1	chr10_92305078_92306055	12.1531019005492	1.42072072255968	0.617532967764376	1.43119189350582	14.8471938158074	1.77217440228972	0.786644994888034	0.961091173025066	0.999946524538449	Promoter (2-3kb)	MARCHF5
cluster_1	chr10_92387108_92387729	11.2780470442311	7.263511839035	4.87166828840761	3.18070481759228	15.3880335717012	5.60093072902604	5.3017023286368	1.80919502332593	0.99750029260455	Distal Intergenic	MARCHF5
cluster_1	chr10_92691448_92692531	13.7901103932719	6.14800844382937	3.97188770627339	2.13793440627598	16.3886121990008	5.10445391557775	3.5555041327151	1.81067980637112	0.999877915679428	Promoter (<=1kb)	HHEX
cluster_1	chr10_93272704_93273703	33.1421511160758	2.42105687779182	3.346581283536	3.09921849894013	32.3166840111146	3.30951506129901	1.18355506720923	1.61093830084635	0.999922674797516	Distal Intergenic	MYOF
cluster_1	chr10_93280114_93281685	27.0286038413124	6.90642418075942	6.18245694582097	3.96473008738854	28.7265968352944	7.11521371579323	6.57881831412948	3.34655396353463	0.999977027876731	Distal Intergenic	MYOF
cluster_1	chr10_93438479_93439320	24.7981122763219	9.41370698304306	4.68868284491918	3.72825431099811	16.8014953283537	6.20293271324611	5.66650628571356	8.18789941147367	0.997179202274819	Intron (ENST00000359263.9/26509, intron 3 of 53)	MYOF
cluster_1	chr10_93841767_93842649	8.36027149975208	3.18369485108676	2.83044233701321	2.01197077126369	20.5149351904763	3.78401414648688	3.52627028903649	2.1498268147525	0.987680596260076	Distal Intergenic	LGI1
cluster_1	chr10_95229842_95231699	30.3651268223246	5.51643296271366	7.15267398655212	3.84939271134018	27.5433339065633	5.54695408630684	4.83469977449133	5.61811931991686	0.999840085532299	Exon (ENST00000451737.1/ENST00000451737.1, exon 1 of 2)	PDLIM1
cluster_1	chr10_95264308_95265039	21.8336569539527	9.39446853351012	1.62437079893729	1.31874501809327	24.0560947016104	3.03596315679829	2.17469800160465	2.39872695269042	0.999875736038527	Intron (ENST00000329399.7/9124, intron 3 of 6)	PDLIM1
cluster_1	chr10_95755431_95756652	10.0719814264778	4.6743402474195	4.57471219920311	3.49566802392188	8.00606520008166	6.17380502589684	2.5575476908396	1.41725295580066	0.988445157278105	Promoter (<=1kb)	ENTPD1
cluster_1	chr10_96309653_96310465	26.3834199307948	4.91506218072949	2.82021966487341	1.991538812992	32.3413950650598	4.90351233498373	2.08794553685455	2.26394827151463	0.999976349879204	Intron (ENST00000630152.1/1791, intron 1 of 10)	DNTT
cluster_1	chr10_96395804_96396651	10.0325178281794	2.47124566093705	2.88851355180794	5.57253063479608	7.93505093094656	2.25977845340836	4.64103545006803	4.86924501959399	0.974079572079106	Exon (ENST00000357947.4/7093, exon 12 of 21)	OPALIN
cluster_1	chr10_96509029_96509591	22.619310195014	5.75171824604128	2.85465696005512	3.90283220985333	24.9789622593727	4.65004211535692	4.9704620864764	3.55386633479816	0.999985721503279	Intron (ENST00000357947.4/7093, intron 1 of 20)	TLL2
cluster_1	chr10_97037262_97038259	15.519191455295	5.90802789762361	5.6314877154404	6.70529122590104	14.9896240153578	4.20779482932358	2.27352304972578	4.91043675486948	0.998535006545258	Exon (ENST00000266058.9/6585, exon 22 of 37)	NA
cluster_1	chr10_97407125_97407863	21.5646660411108	8.82574111352572	7.93112936194415	8.70735050490937	28.3289659954328	12.8088029825681	10.685493198404	10.7314185960423	0.999181949059793	Intron (ENST00000422848.1/ENST00000422848.1, intron 1 of 1)	RRP12
cluster_1	chr10_97418718_97419458	15.369253746811	2.61165537099926	2.3832154383256	1.7837128741787	17.0656952436567	4.62547503818716	0.956857124374632	1.55077502548591	0.999968070692538	Exon (ENST00000422848.1/ENST00000422848.1, exon 2 of 2)	LOC644215
cluster_1	chr10_97427492_97428056	24.9331303658313	11.6874000842368	7.90125154270891	7.11131926073015	22.318787788657	10.2232233964469	6.78678470099497	5.52732754421407	0.999834904846181	Promoter (<=1kb)	PGAM1
cluster_1	chr10_97479831_97480476	30.160410267963	6.79168128122156	3.82822776890017	6.44516832438353	37.146710260894	2.70817560242011	1.47027947703674	1.49083921745974	0.99976807890668	Exon (ENST00000422685.5/64210, exon 4 of 10)	MMS19
cluster_1	chr10_97572104_97572884	11.2708656231922	7.16597743516305	3.77700560339729	4.19899800361894	16.1908167966352	7.23497448740961	3.36817794837678	2.90366385091277	0.998003336508963	Promoter (<=1kb)	ANKRD2
cluster_1	chr10_97648447_97649371	7.00971941190653	2.94083978018548	1.11538906062569	4.02378558777493	7.5221940415972	1.32448314923823	1.67883307854952	6.37477785780759	0.942082523286701	Intron (ENST00000370649.3/55361, intron 2 of 9)	PI4K2A
cluster_1	chr10_97771200_97772415	16.4478441521072	7.25211517111905	5.82268611269425	7.16497879635502	14.4708647561441	7.36497193519432	5.5956631913647	9.18021082672186	0.998614647109181	Promoter (<=1kb)	SFRP5
cluster_1	chr10_9911327_9912132	19.2455661850407	1.48750156220541	1.16908347517003	0.311561400513441	18.4058687633324	1.13401402596059	0.259260714064098	0.461222558347072	0.999962018981638	Distal Intergenic	LINC02663
cluster_1	chr10_99232063_99233023	14.7150611181221	9.15658042555241	4.92279452754363	2.59372744749406	16.0535303652791	6.67446729599143	5.43599656568506	3.40825286985371	0.999208141192491	Promoter (2-3kb)	HPSE2
cluster_1	chr10_99236003_99236653	17.2873290141833	7.43880280476704	3.87154585629402	1.1048675226889	20.1627298878059	5.9951247948646	5.9304860131516	1.00850837102533	0.999611838043427	Promoter (<=1kb)	HPSE2
cluster_1	chr10_99392508_99393507	7.95057710541056	2.87322011752133	1.9004899018572	3.43834199428978	9.36125332765606	2.51990721242837	2.08443237895957	3.31009937254221	0.999455277425028	3' UTR	GOT1
cluster_1	chr10_99522832_99523363	13.1780385341604	7.67122198936058	3.14415955416278	1.61803346939021	17.254124992959	7.33790355353711	3.39150049567638	3.17724798078203	0.999044195460709	Distal Intergenic	LINC01475
cluster_1	chr11_102268251_102269431	30.7169637395446	8.71216127760476	6.26727206457936	5.84651824030544	24.0158753376499	5.60919754121037	9.32801644874664	8.76547461454149	0.999043224942306	Distal Intergenic	YAP1
cluster_1	chr11_102390643_102391254	12.7657289320106	4.03943707370764	5.67258580118655	4.86025832836454	14.4756160979117	5.41908142933109	4.84293949281222	5.21686954338583	0.999598659743891	Distal Intergenic	BIRC2
cluster_1	chr11_102612853_102613820	19.8691079443262	6.78727125474354	2.41809626171099	3.21823699252275	20.2892371429899	3.6802155273823	4.78291546870673	1.53281516090736	0.999945704930883	Intron (ENST00000542119.1/101928477, intron 1 of 3)	MMP20
cluster_1	chr11_102807634_102808414	17.4384525832621	1.73572265569602	1.99860868100084	1.78297931767733	14.9686090011449	1.44435204866889	0.621028527961408	0.981494693339512	0.999801965722039	Exon (ENST00000546014.1/ENST00000546014.1, exon 1 of 1)	MMP1
cluster_1	chr11_103325707_103326778	14.6726474936032	5.68469965604153	11.5721121959517	3.63801047776125	14.1227909667193	4.48146801188568	4.49111078330856	3.51005205558807	0.973625480200758	Intron (ENST00000375735.7/79659, intron 82 of 88)	DYNC2H1
cluster_1	chr11_10351578_10352972	46.8265044563937	31.2167285389094	19.6426767528261	8.01445968666099	56.5133427877499	14.3274235393843	23.319016678494	6.17556502308204	0.994952549020135	Intron (ENST00000527261.5/100130460, intron 2 of 2)	CAND1.11
cluster_1	chr11_10366365_10367187	18.192880117551	4.91362548925942	2.25119676087797	3.0544929777618	17.3172187313207	4.00202316304323	2.18334178329493	2.96900347251916	0.999987721840752	Intron (ENST00000527261.5/100130460, intron 2 of 2)	CAND1.11
cluster_1	chr11_10450189_10451456	19.2820421435373	10.1013525300315	7.20310108567058	2.95496480175047	20.1233706867945	8.88232684994482	7.50854816234693	10.1877163153757	0.998745938966428	Promoter (<=1kb)	AMPD3
cluster_1	chr11_104968984_104969834	10.6058770613341	2.7717865419872	2.71479573819981	1.43523211613724	10.6775612972919	3.26014498960763	2.15241595925336	2.39070893405931	0.999980185074807	Promoter (<=1kb)	CASP4
cluster_1	chr11_105960016_105960988	19.1332336557659	3.74021844769892	5.91571661792311	2.43268774463181	19.5729597597622	3.43999516755338	1.68595733017584	1.28627746516035	0.999682416739411	Intron (ENST00000282499.10/2893, intron 14 of 16)	GRIA4
cluster_1	chr11_106956869_106957695	16.8909521851624	2.67755921166275	1.71642532627112	2.41160013510266	13.3711264019352	3.34668953907822	1.79105448824394	1.12735072901089	0.999783363878798	Intron (ENST00000526355.7/2977, intron 3 of 7)	GUCY1A2
cluster_1	chr11_107999740_108000411	16.1341735028115	3.10434246052051	1.0281195245934	1.79419491371922	13.744202820894	3.38970269288732	1.84296328793668	3.40450601957345	0.999895749051705	Distal Intergenic	CUL5
cluster_1	chr11_108788477_108789219	12.2615999513611	5.20202298665818	2.73793469696916	3.54929279066469	12.9722468131194	2.35580752726124	0.920778331730466	0.769102219829219	0.999399636612498	Intron (ENST00000690021.1/1662, intron 14 of 18)	DDX10
cluster_1	chr11_109421918_109422642	23.8643118063444	6.93876397446061	18.0935944203985	12.7206610816467	20.5836045525237	8.33827940574614	8.70053412116655	4.88835760522912	0.944054097891858	Promoter (<=1kb)	C11orf87
cluster_1	chr11_110208826_110209744	12.8094382491951	9.35664721250271	7.07102130603406	3.67816944708474	11.7092212225587	4.00075910391859	3.15834260500645	2.84130280659255	0.983608619744755	Intron (ENST00000645527.1/5962, intron 14 of 18)	RDX
cluster_1	chr11_110564617_110565776	11.9961566641103	4.25144748445012	2.08095780891646	2.31711892320758	10.2645548357473	3.97979825277378	2.59048372594083	1.54421510209885	0.999891474314757	Distal Intergenic	ARHGAP20
cluster_1	chr11_111422871_111423502	10.6739650093043	3.30623480602672	3.85198149579154	2.99968387479643	13.9748536689822	3.82319651593253	3.42382025658256	5.61399493153688	0.998740138439405	Intron (ENST00000531398.1/5450, intron 1 of 4)	LOC100132078
cluster_1	chr11_111454540_111455557	10.7641422866895	2.98319346811013	3.59939356951285	1.3412401475857	12.3019832400534	3.87008760458242	4.29552635490215	6.20684250505094	0.997015564041342	Promoter (<=1kb)	BTG4
cluster_1	chr11_111918572_111919353	19.0126324007471	6.53645755259065	1.25497189931512	1.1677918723923	14.4429804147249	2.42485811248169	1.38431228611829	4.48175908533143	0.999017230058459	Promoter (<=1kb)	C11orf52
cluster_1	chr11_112822268_112823382	14.699008382678	3.52786400340647	2.64546441676174	4.26585447632918	17.4115649404389	3.03149202852893	4.56363502003598	1.45228979488964	0.999665474027815	Exon (ENST00000669768.1/105369498, exon 3 of 3)	LOC105369498
cluster_1	chr11_112922338_112923222	9.13686778061364	4.79483120915724	4.05847663117268	2.1958334821409	8.53299071123798	4.31446138814283	3.17609834620309	0.736919788348665	0.99641502112779	Distal Intergenic	NCAM1
cluster_1	chr11_113628694_113629556	21.4649462631985	6.16266093900167	2.38379017134857	1.93878488931871	30.1279119336604	5.72239999270641	6.26994649224001	5.55614361717574	0.999680321947072	Distal Intergenic	TMPRSS5
cluster_1	chr11_113849539_113850498	26.2290989821719	1.60823761783657	0.586469604107946	0.802194911843688	30.001628851048	0.339962039969111	0.133294708433269	1.08498855916616	0.999940205990422	Intron (ENST00000003302.8/57646, intron 3 of 24)	USP28
cluster_1	chr11_113974768_113975732	20.7897279220368	7.1651974094257	3.37092161079607	9.40717348795742	19.4229588962933	7.93910926200135	5.2383092490785	8.68422107472589	0.998673878727357	Promoter (<=1kb)	HTR3A
cluster_1	chr11_115527684_115528616	10.0672851741499	5.34665867557437	0.81051736955612	0.619491631983591	11.0733365034888	1.45655530416651	1.85509397906848	1.38120755154019	0.999453631134689	Distal Intergenic	CADM1
cluster_1	chr11_116687366_116689084	14.2862594407369	3.39650965552503	1.72213808319159	2.4017158753848	16.8601511050604	6.31490936515124	3.17092604842702	3.80110430183164	0.999892847512602	Distal Intergenic	LINC02702
cluster_1	chr11_116696282_116697177	11.4571419491813	1.99589009506421	3.30380153593705	3.91557596418516	13.0675033398675	5.59540740613175	3.15600280311316	3.78506377122877	0.999213330576233	Distal Intergenic	LINC02702
cluster_1	chr11_116732047_116733165	16.2704877703091	6.09641436776232	6.15175910586975	6.55277281911577	18.1025906473912	7.7010669519831	6.27161069826073	4.11859016054461	0.999839467880959	Distal Intergenic	BUD13
cluster_1	chr11_117181250_117181622	24.6671297113844	4.50400134311864	2.98784245925999	3.61525578020594	30.4581950622746	7.72364636654005	4.71363713524767	6.9430279031069	0.999877129072897	Promoter (<=1kb)	SIDT2
cluster_1	chr11_117197639_117198369	19.7510260645183	3.61667358394215	2.66164460063888	2.29000721969805	17.9525580553489	6.8104328216696	4.83055615773093	5.89935853366837	0.999752414936	Promoter (1-2kb)	TAGLN
cluster_1	chr11_117861089_117861971	21.3267322916649	8.04920733704747	2.1056399520412	6.83704229663262	22.3976996580316	10.4911759704096	7.31046097869055	7.88702627290603	0.999600520470483	Intron (ENST00000532984.1/100533181, intron 1 of 9)	FXYD6
cluster_1	chr11_118210707_118211512	13.0828544383813	4.84995371835074	1.58661105246864	1.76349045184443	14.04831947775	3.0268711139887	2.03825746464148	1.74918405417583	0.999989775370192	Promoter (<=1kb)	JAML
cluster_1	chr11_118610904_118611363	36.0898163325579	16.6482849442741	4.55289496981922	3.83215518427676	30.1396437138334	14.3281826009367	8.62628963617442	13.9000823282865	0.998434967884725	Promoter (<=1kb)	PHLDB1
cluster_1	chr11_118615248_118615736	39.3977948005294	11.2841978648251	2.90677900450347	2.50007586528024	32.7471604357721	14.184361231446	15.8650084569092	7.51056678983815	0.998545876015485	Promoter (<=1kb)	PHLDB1
cluster_1	chr11_118634278_118636001	25.8031404074549	12.1640701102948	6.32708145104661	9.32881918913675	29.155985056166	14.209600540746	13.8402620796386	13.6798750295497	0.999090445254492	Promoter (<=1kb)	PHLDB1
cluster_1	chr11_118659167_118660147	26.0687068808111	17.0870180459401	9.71064571092825	9.23514826095231	27.0021529689206	13.4270975451381	11.5137390594077	13.2116611961113	0.999671299919807	3' UTR	PHLDB1
cluster_1	chr11_118715613_118716297	29.8596700316599	6.91815214306787	1.59060732612542	1.49420307700204	26.9629076086655	6.59420550053583	2.76173695106538	3.03590524836361	0.999988573791946	Intron (ENST00000526274.2/105369519, intron 2 of 2)	LOC105369519
cluster_1	chr11_118911734_118912769	41.9505370189244	23.0824167726014	7.04214348452293	12.4385369037745	45.7226283377779	20.8300265062224	11.3724650103342	18.0849462385061	0.999505586075023	Promoter (<=1kb)	BCL9L
cluster_1	chr11_118930052_118930631	42.6581584473435	15.5737451005625	5.40943901019135	13.7798528188569	33.451117211569	15.6083583666372	10.5034207576528	10.8970413660744	0.999175736259989	Intron (ENST00000534788.1/7379, intron 1 of 5)	BCL9L
cluster_1	chr11_119168538_119169761	29.2146248002871	15.2091224426425	4.47619188804448	6.12415554266368	27.2659572225549	15.4699693983527	11.5184758968014	14.7801984031134	0.997161980789007	Promoter (<=1kb)	NLRX1
cluster_1	chr11_119195601_119196136	25.791088244705	3.43875985377401	0.538434365403998	1.2731946794323	21.8491395234587	2.85132856158621	2.30484512586756	4.32059893604509	0.999863436614096	Promoter (<=1kb)	CCDC153
cluster_1	chr11_119315057_119315813	20.3937605923447	9.64106033820383	4.72050060335031	8.72330528908115	21.1687538031724	12.1532883436059	7.16248784946855	18.9534462420266	0.961097897604316	Promoter (<=1kb)	MCAM
cluster_1	chr11_119416663_119417703	23.9990040686316	1.76867599592212	1.45630890935817	1.49973745297673	16.9058055521301	1.71550143240193	1.08967299933502	4.04542750942794	0.998898966195659	3' UTR	THY1
cluster_1	chr11_119726403_119726954	21.4216039550978	12.084970984398	5.28714482033634	5.9862666519889	20.828016845318	8.60138061467177	7.71233791979985	4.49236979915458	0.999640122850992	Promoter (1-2kb)	NECTIN1
cluster_1	chr11_119964279_119965343	9.53153024815208	7.87171455495845	1.33545204943626	1.60925527312073	13.726629582316	5.41223779781423	3.10183643075263	1.17157957755602	0.99314908947325	Distal Intergenic	LINC02744
cluster_1	chr11_120013203_120013916	23.7421205266223	11.2984637218551	4.50760300936556	6.08112120183541	19.2322317605475	9.53011565530244	5.12100139200266	4.08803527797618	0.999126095489764	Exon (ENST00000667462.1/ENST00000667462.1, exon 1 of 4)	LOC105369527
cluster_1	chr11_120057584_120058636	20.379063571941	8.6559154118817	6.70114672025217	7.35178298492253	23.7634863086896	9.25682722978654	5.59396961453931	2.93447523831619	0.999718448509043	Distal Intergenic	LOC105369527
cluster_1	chr11_120306373_120307100	11.2680430819819	1.72863337287703	1.17713811632096	2.88300047530897	12.5216252266787	4.80486090428836	1.99971602516049	13.9488228761718	0.878813998135432	Promoter (<=1kb)	POU2F3
cluster_1	chr11_120316834_120317548	10.8284185470641	3.70334448382543	1.83015675109344	2.29681189055098	11.2188430366907	2.01942646732899	1.95087577551388	6.40316780761775	0.996270005421137	Promoter (<=1kb)	POU2F3
cluster_1	chr11_120527048_120527960	29.0007559804449	5.04211718057473	5.38419173543313	4.99609809555108	31.4057528419987	6.2272346438157	4.24189120338735	8.49338644553502	0.999858914288313	Intron (ENST00000638419.1/2900, intron 1 of 20)	GRIK4
cluster_1	chr11_121245991_121246934	8.86053973058811	4.51999424598767	3.29859355199657	1.92378512853299	8.01000468642104	2.76634700749058	1.81057808202769	1.16626031022301	0.998744103028917	Distal Intergenic	SC5D
cluster_1	chr11_121372545_121373508	12.2677547738427	1.05989147995304	0.73806647399473	1.35855542866136	12.640648984132	2.20377846946456	0.866501071995465	1.35176195903772	0.999966868545155	Distal Intergenic	SC5D
cluster_1	chr11_121406127_121406955	31.3252711288514	2.08375982960984	1.03927487654102	0.803024142653461	31.2558426931808	1.5893189133638	0.617439807872975	1.02126330076178	0.999969269194853	Distal Intergenic	SORL1
cluster_1	chr11_121479043_121480202	18.1965736414921	5.80043570327678	1.84554098555757	2.05031846521083	16.7292751313802	4.23447740246894	2.26562515502527	3.08112915396251	0.99998075045244	Intron (ENST00000260197.12/6653, intron 3 of 47)	SORL1-AS1
cluster_1	chr11_123165967_123166684	9.94781321568621	4.52500810978964	2.08453257227379	2.14882699273501	14.8446212774881	4.79002262160679	0.855369683605409	2.11066798568885	0.999110678970451	Intron (ENST00000448775.4/79827, intron 1 of 6)	CLMP
cluster_1	chr11_123194304_123196582	16.2502564901083	8.47260690532524	4.46268010917586	4.48940150765542	17.5029559321035	9.4881009769434	6.69527546923253	8.97532938886376	0.999133808158253	Promoter (<=1kb)	CLMP
cluster_1	chr11_123742316_123743099	20.4461495069436	2.46886039234863	2.98929927908272	4.35827206066155	17.1311781726147	2.41722785725582	3.26100982725195	1.5058678540066	0.999422062157317	Promoter (<=1kb)	ZNF202
cluster_1	chr11_123775113_123776387	18.4311158103003	0.799978966968251	0.849694841060941	1.15558376311618	14.8402512887992	0.832258979410897	1.70439989457848	5.64115128820427	0.998147794731614	Distal Intergenic	OR6X1
cluster_1	chr11_124069317_124070025	11.4063790337408	2.77191754107542	7.98869598597726	11.5472168604412	12.0525062912503	3.92315951456182	4.88781459779448	5.86714657559356	0.818507059977105	Distal Intergenic	OR10G7
cluster_1	chr11_124481384_124482273	10.4833004416038	4.9004946465964	3.51229385963273	3.98417042955088	9.86516714928946	4.19845131485621	3.97212835900427	3.9289393104484	0.999975083734286	Exon (ENST00000642028.1/ENST00000642028.1, exon 2 of 2)	OR8B8
cluster_1	chr11_124745660_124747286	19.2813238012575	11.2638798598128	5.87962616924488	5.23403079431765	18.770954433588	9.0936905899243	7.61226915410521	5.63985079672834	0.999725645680415	3' UTR	VSIG2
cluster_1	chr11_12556354_12557461	8.6556043462988	2.54158091768186	1.71028668180552	5.15336193296195	7.76664199804295	2.86739590467411	2.40553567322467	7.73846533850704	0.916989445337753	Distal Intergenic	LOC105376556
cluster_1	chr11_125941379_125942383	15.4740092784405	4.36521601588821	2.66249230660978	5.35081936084287	14.4789455982504	4.79241366124338	4.04089364099397	4.82940044635434	0.999789609759226	Intron (ENST00000637851.1/29118, intron 8 of 8)	VSIG10L2
cluster_1	chr11_12598809_12599983	6.67653065584713	2.22357795475323	1.47395782787651	1.71346520616533	5.22834202074624	2.52408192525771	1.11486537417801	2.04594085586008	0.999380663631249	Distal Intergenic	LOC105376556
cluster_1	chr11_126159579_126160697	12.8588736341384	9.09943452675771	3.69521918785534	3.2657837340609	19.4182655516634	10.0040586788642	9.55574787431469	3.13148027169859	0.984536790968741	Distal Intergenic	LOC105369591
cluster_1	chr11_126336354_126337110	13.7841075324659	2.64678000432844	2.04474668764209	3.18251436981229	9.29393056550374	3.1387623374543	1.59750470729377	4.04958306803882	0.997157207244589	Promoter (<=1kb)	DCPS
cluster_1	chr11_126440645_126441775	12.1293478470225	4.71407620838399	4.53528738120234	10.3953240928268	10.3794139191658	4.4078810151182	5.15743693212932	5.65278773907075	0.93090790967279	Promoter (<=1kb)	KIRREL3
cluster_1	chr11_12687594_12688350	14.0015485641396	7.99972129639318	1.77886545858271	2.11159627826414	19.1500591935597	2.94701229180703	1.86444777674056	2.54782344055588	0.999233718503896	Intron (ENST00000527636.7/7003, intron 2 of 12)	TEAD1
cluster_1	chr11_126989993_126990850	15.4498578250075	5.36462978758709	7.05258494051311	11.1381323490716	16.3504082984785	7.70986092770491	7.50039999466686	6.33957265997724	0.990451126107268	Promoter (1-2kb)	MIR3167
cluster_1	chr11_12724261_12725168	20.9242343730664	4.82765483414132	5.92869940405482	8.2588818691124	26.7977345958768	4.80868371880002	2.86431534675179	5.08026564842984	0.998935779084681	Intron (ENST00000527636.7/7003, intron 2 of 12)	TEAD1
cluster_1	chr11_127363000_127364013	9.32503528237844	7.76368322177675	3.04679483976593	2.28209609779292	9.45393997877913	6.32017670799895	1.63638548598677	2.18236088219973	0.979938876441996	Distal Intergenic	LINC02712
cluster_1	chr11_128582614_128583370	17.2327800447061	3.89387358289992	1.90012821648791	1.61143506258595	20.2409835988658	4.42913824998159	2.10989305306955	6.86205734291489	0.999634631154814	Intron (ENST00000392668.8/2113, intron 1 of 9)	ETS1
cluster_1	chr11_128686026_128686717	18.7461646957582	4.25677603272614	2.41853302459865	3.24383397532575	17.0551827827081	4.04105069585606	2.89978242917769	1.5518897394775	0.999963156245254	Promoter (<=1kb)	LOC101929538
cluster_1	chr11_128692859_128693394	15.0160688957399	10.715198560768	3.45193462106437	3.66923109954505	14.1848452510164	6.95206031390639	5.25343580453631	12.5842842068761	0.959859126062388	Promoter (<=1kb)	FLI1
cluster_1	chr11_128784138_128784921	19.7288233136535	3.49252411453451	1.79172903843582	2.04019511890119	20.2251709135674	2.38801668434897	1.82395261357675	1.12063575321757	0.999984684627565	Intron (ENST00000608303.5/2313, intron 3 of 6)	FLI1
cluster_1	chr11_128859605_128860273	14.7802932155307	2.94713798899693	3.44436806730229	1.87589987406699	13.4378543124941	5.03030506180276	3.89552441678543	3.80762125036779	0.999827983469089	Intron (ENST00000392665.6/3758, intron 1 of 1)	KCNJ1
cluster_1	chr11_128870841_128871821	14.1666457731147	3.91561530371287	2.13741191328161	5.01832915162962	16.5584257220263	2.78656510778855	4.83195860785498	2.70579786081018	0.999475628985277	Distal Intergenic	KCNJ1
cluster_1	chr11_12913819_12915023	17.6882060366511	5.82221315072555	13.0257832124348	18.4504946629604	22.6715010499464	6.70029114437215	8.13164669386148	5.25241675860172	0.883793016093849	Intron (ENST00000527636.7/7003, intron 10 of 12)	TEAD1
cluster_1	chr11_129315707_129316490	14.6254412428236	6.001331662189	2.26351165496737	3.0351785987545	11.6343700794837	4.62801948116837	3.67134651241117	1.64497386093809	0.999403043906003	Distal Intergenic	ARHGAP32
cluster_1	chr11_129695388_129696505	21.1369423470825	7.03979360243423	8.66745876573999	6.13001897068337	15.5522951432261	9.06797480807803	9.02464642518699	5.59245120939359	0.996153797128965	Distal Intergenic	LINC01395
cluster_1	chr11_130146003_130146898	26.6585662943354	6.16527527976766	2.3735861952878	2.80951759628275	27.28900721311	2.22027234158729	1.51212332113405	2.06929097661941	0.999967340391978	Distal Intergenic	APLP2
cluster_1	chr11_130159316_130160291	12.8408546700673	6.15271938575292	2.85718771238471	3.15262357661021	9.92992319204949	5.87927019058807	3.27356387314656	3.44593649637557	0.998734912525123	Promoter (<=1kb)	ST14
cluster_1	chr11_130377913_130378765	19.8610129148949	1.80980261643951	0.589342801977813	0.826170884179964	16.7958854077227	0.824671934167067	0.491771085305307	1.3369704897305	0.99987401390425	Intron (ENST00000602376.5/646383, intron 2 of 5)	ZBTB44-DT
cluster_1	chr11_130403262_130404561	23.5590929719953	2.08556749611628	2.50810415239365	2.94251353122147	14.9324869777664	1.57694501895167	1.56282800274633	3.82244254746455	0.997190294594039	Promoter (1-2kb)	ZBTB44-DT
cluster_1	chr11_130431234_130431673	21.9727261300628	6.92901212588969	5.05607631859732	8.92092380347597	18.0714277039243	11.9460691292426	6.75860820282997	6.47408895372558	0.997942581517096	Promoter (2-3kb)	ADAMTS8
cluster_1	chr11_131217456_131218390	11.017159521722	1.91752488248779	1.11804293116802	1.84422823317346	12.9292321503236	1.50848408555844	1.1355547969019	1.82104594513075	0.999924674919403	Distal Intergenic	LOC107984412
cluster_1	chr11_131253094_131254991	15.0517839231436	3.18329931830889	2.58097979705008	4.08020634367177	15.043797504136	4.54251248714582	3.38411135547094	2.82690102712271	0.99994141063329	Exon (ENST00000416553.2/ENST00000416553.2, exon 1 of 2)	LOC107984412
cluster_1	chr11_131465707_131466175	17.5296956216866	6.02866531534267	3.52666414845344	4.21267520487968	18.5143523694505	6.69727460122767	5.03472939192683	4.41819861761592	0.999997997502101	Intron (ENST00000374791.7/50863, intron 1 of 7)	NTM
cluster_1	chr11_131503981_131504716	17.3562149211677	6.30337273708322	4.72644219809653	6.66225472565695	13.6065296132955	5.71538796845329	5.72634842059461	4.27274161316081	0.998957147807245	Intron (ENST00000374791.7/50863, intron 1 of 7)	LOC101929653
cluster_1	chr11_131656412_131657157	21.9786887150769	4.12067652195066	3.40892450905037	2.47495960441795	18.0104357255798	2.08742970960685	2.81968889307488	1.35088511549479	0.999710499246045	Intron (ENST00000374791.7/50863, intron 1 of 7)	NTM-AS1
cluster_1	chr11_131904525_131905348	15.5884629661421	2.99941542410983	2.04107953888833	2.89478406790663	18.6696753259076	3.08164433044651	3.0522324458348	1.46776960010765	0.999933941134908	Intron (ENST00000374791.7/50863, intron 1 of 7)	NTM
cluster_1	chr11_131982043_131982617	14.7133553461825	8.1468084944053	3.2555277936373	1.91051973041818	25.3995765580772	5.56964218264586	1.87221166106399	1.51383332286735	0.997868432946159	Intron (ENST00000374791.7/50863, intron 2 of 7)	NTM
cluster_1	chr11_133529859_133530786	12.6640565389565	3.53124599164418	1.84258218856155	2.4972827766742	14.5314883375278	4.04135322011565	0.969042168284124	2.41718105833954	0.999967990795944	Promoter (1-2kb)	OPCML
cluster_1	chr11_133540988_133542028	21.3822603939842	10.5118940042327	3.84127764839538	2.63205770377584	18.8900975082831	8.96364685400818	4.96252487305958	4.11844174108522	0.99945846762915	Intron (ENST00000663344.1/ENST00000663344.1, intron 1 of 1)	OPCML
cluster_1	chr11_133787391_133788302	12.6341626964869	2.78712605002552	1.43740083964054	1.48388262538343	16.240726637288	3.87898231832944	2.23077400260017	1.48870446654888	0.999949693450233	Intron (ENST00000526254.1/646522, intron 2 of 2)	LINC02743
cluster_1	chr11_133894960_133895659	12.1200199547787	4.35746172066621	3.51307310224562	1.5181274080275	10.3022021534032	5.24000651961146	3.27062168675061	2.73117144096204	0.999617866399211	Promoter (2-3kb)	MIR4697
cluster_1	chr11_134272792_134273491	33.5264823970511	7.21214943293934	4.82339406182703	2.70857711759384	31.9259848726575	5.08793292336578	6.21790698707945	1.59197798629198	0.999956040906958	Promoter (<=1kb)	GLB1L3
cluster_1	chr11_134275643_134277399	14.0548059155552	5.57069074574291	7.43890873096102	6.88415763433961	18.942765629861	8.35830715247994	8.08149275125133	6.10587488731662	0.997650263666772	Promoter (<=1kb)	GLB1L3
cluster_1	chr11_13486929_13488051	12.3162406050454	2.02350038071938	0.936828737865814	1.2991336022979	10.8926777648332	0.667432283820515	0.877922911047636	1.65923378856059	0.999844061200351	Distal Intergenic	PTH
cluster_1	chr11_134990169_134991173	21.2684205691391	1.75085373431649	1.11571724168479	0.893855950846815	17.1389028109566	0.868372517249873	0.77602639814987	1.35824041035608	0.999772191277233	Distal Intergenic	LOC100507548
cluster_1	chr11_14300358_14301243	13.0176795530362	3.64110741358256	4.51558179266378	5.01007409537765	14.6301690540533	4.47187991045495	5.63482541828655	8.76012220624914	0.993815311860188	Intron (ENST00000256196.9/22800, intron 1 of 5)	RRAS2
cluster_1	chr11_14340638_14341313	25.7158948769796	1.31611872828667	0.95655031878768	1.04450580990292	20.9672499511667	1.45533281128537	2.18371089561446	3.08630650882499	0.999687096361251	Promoter (<=1kb)	RRAS2
cluster_1	chr11_14904863_14906210	21.1492857501957	7.62270472648551	5.23519572126369	1.97203349343126	22.504773916683	8.89983604989822	9.97360250767014	3.92453372732927	0.99930961728719	Promoter (<=1kb)	CALCB
cluster_1	chr11_14907379_14908123	17.3706034807608	4.53807932631351	3.36477744167424	3.33846187575574	14.6208142041566	3.85255789147329	3.76459976066826	4.8624883286488	0.999782814915462	Promoter (2-3kb)	CALCB
cluster_1	chr11_14969778_14970223	25.2571425955298	3.81759098351444	6.29251636634519	4.05767633501503	14.8757645854081	5.20004362784813	4.54685500383268	2.99938419671696	0.994249578008409	Promoter (<=1kb)	CALCA
cluster_1	chr11_15034749_15035747	13.4388961729673	2.19626591979505	2.16919797896691	0.992488625559969	9.74656148586806	0.74544279472864	1.02872020818337	1.87988140208703	0.998937743638527	Intron (ENST00000523376.5/797, intron 6 of 9)	CALCB
cluster_1	chr11_15552330_15553086	14.0638244213676	5.5738615190714	1.63075675994692	2.74392150544109	13.557709197038	3.50766699752124	1.56634327258864	0.263216089253754	0.999808513940905	Promoter (<=1kb)	LINC02751
cluster_1	chr11_15988747_15989406	16.0888968740926	2.22801187746105	2.28453463241794	2.32276531319857	9.65472334649775	2.74518713598	2.03328461944444	16.4643923724806	0.81617774542496	Exon (ENST00000316399.10/55553, exon 13 of 15)	MIR6073
cluster_1	chr11_17544017_17544666	21.1021776353079	7.13207818931696	5.81714791655171	2.6203425576367	22.0763858425205	5.91159861829705	4.01424717643762	2.49964398947036	0.999956923909886	Promoter (<=1kb)	USH1C
cluster_1	chr11_17546883_17547616	25.3301923402789	8.06754363354693	6.2875056162748	3.28700543879922	32.9591015153307	7.75533223571513	4.89330387072745	4.2732147150131	0.999906321220878	Promoter (<=1kb)	OTOG
cluster_1	chr11_17720075_17721137	12.81016995323	6.32189038644961	4.95073260066376	3.87299832971671	14.6887445619816	5.66709962736033	4.21885103854007	2.48148711236083	0.999819808357395	Promoter (<=1kb)	MYOD1
cluster_1	chr11_1824881_1825531	19.3778043832045	15.8876601733904	4.55467250012928	3.39499637723431	22.145163755572	16.8372885061982	10.7191230678134	6.29023833601068	0.967403458600241	Promoter (2-3kb)	SYT8
cluster_1	chr11_19772202_19772901	17.1506920717734	3.10547980023504	1.16720595977112	2.29321779878099	20.9515527622771	2.50894779392776	1.83526624640677	1.34965693164914	0.999958284642491	Intron (ENST00000360655.8/89797, intron 1 of 37)	NAV2
cluster_1	chr11_19791089_19791793	24.1139224510218	1.66255746542787	0.914295539373691	2.1789862167807	28.2730261121657	1.44850332030793	1.24544201524425	1.12218976254117	0.999922419612195	Intron (ENST00000360655.8/89797, intron 1 of 37)	NAV2
cluster_1	chr11_19816889_19818295	22.2325224534805	2.08746353652713	1.52108425182965	1.00113939535475	25.4340974715286	1.20153114117186	1.2158383458406	0.970410003953425	0.999951942865839	Intron (ENST00000360655.8/89797, intron 1 of 37)	NAV2
cluster_1	chr11_20026913_20027776	52.3677183697519	18.4169751155078	5.84928139922267	4.25309615060681	64.3792953639601	8.457846300917	9.61819837581348	7.12856054724674	0.999939613126956	Promoter (<=1kb)	NAV2
cluster_1	chr11_20064822_20065811	10.174005780628	1.01002051560769	2.38347047201684	2.86218525047392	9.13701567983703	0.947460890040228	1.48025937669696	2.14237583499669	0.998306627863848	Intron (ENST00000360655.8/89797, intron 20 of 37)	NAV2-AS2
cluster_1	chr11_20131805_20132746	12.5327771834273	3.77830320974292	4.17491165529506	1.89111650638419	12.8997975665269	4.19605567415012	4.3811833003515	3.20618087191386	0.99987971738771	Exon (ENST00000623701.1/ENST00000623701.1, exon 1 of 1)	NAV2
cluster_1	chr11_20156264_20156982	18.7750046723792	3.54594091552354	4.22463210405773	1.79737608852677	14.8576312891388	5.16718464141923	3.40907323404183	2.08914907374665	0.999599970918478	Exon (ENST00000524983.3/120237, exon 4 of 4)	DBX1
cluster_1	chr11_20544525_20545366	10.7284468391548	1.93752637088759	6.11570961080351	2.80187256834303	11.7104293707008	2.8056347908593	2.96085875687407	2.63356114379854	0.995360651832563	Distal Intergenic	SLC6A5
cluster_1	chr11_20596666_20597831	17.809684930373	4.605369140026	7.1257691192242	3.69768443419763	12.0995310761	6.35796537473222	7.33210224780641	2.02544828286049	0.988692200895548	Promoter (1-2kb)	SLC6A5
cluster_1	chr11_2089068_2089964	11.4293341689512	1.6007636883996	1.50074455461546	2.16351382203246	13.7707588555878	2.03891816128331	2.14203821160221	1.51568558070993	0.999873559381964	Distal Intergenic	MIR483
cluster_1	chr11_22340622_22341412	19.4265635482899	5.17360937810686	12.0750228500505	6.77336663266968	17.5815666103592	2.8745668293611	3.02657322089925	1.70358960412196	0.981395611743537	Promoter (1-2kb)	SLC17A6
cluster_1	chr11_22343280_22344166	15.6080411175576	5.93946980159304	12.120467776195	3.04271671537143	15.1671879618682	3.50695445172618	3.74008936373915	2.56834825606615	0.972401317531914	Promoter (<=1kb)	SLC17A6
cluster_1	chr11_22528428_22529399	21.9580267122098	5.15737921176732	4.80057105640804	2.42100342081838	18.4930035477136	4.43621687909822	2.85443340449442	0.871611851812375	0.999764996441166	Distal Intergenic	LOC105376588
cluster_1	chr11_2693014_2694208	26.7188215583057	8.48154821804578	5.49844762048128	6.46567710706592	35.8058300665443	6.93478049518131	4.93115934419206	3.07212941579577	0.999803139076016	Exon (ENST00000597346.1/10984, exon 1 of 1)	KCNQ1OT1
cluster_1	chr11_27347628_27348820	13.1603271318789	6.57577788674009	2.77544553976955	1.42767274194845	17.3771619277745	2.91714861969243	2.88150528393264	1.0790325722657	0.999548633472319	Promoter (1-2kb)	CCDC34
cluster_1	chr11_27687777_27688741	10.5850990572296	2.65948233414879	2.21826007009082	2.2534465140122	11.8030743572115	1.61893387392296	1.51784489389192	1.6486470432558	0.999906068740009	Intron (ENST00000652063.1/497258, intron 5 of 5)	BDNF
cluster_1	chr11_28793060_28794118	16.158259831341	2.12999954283562	1.90599588553439	1.4464542003766	18.0053561986522	1.14893766597414	1.01323291055847	1.44439110830861	0.999932353460006	Intron (ENST00000662190.1/ENST00000662190.1, intron 2 of 2)	LINC02742
cluster_1	chr11_30025341_30026256	12.315169852932	1.30992205740771	1.41341507346046	0.85357241984128	15.9939180629888	3.18518854044869	2.45776798129112	1.07923411576587	0.999851134391688	Distal Intergenic	KCNA4
cluster_1	chr11_30453645_30454378	11.9373658986202	2.76028343080202	4.71455522724602	5.46851317076875	15.8290147352448	1.57504300353612	1.79181100842209	1.93063088799033	0.995904794352722	Intron (ENST00000448418.6/744, intron 4 of 6)	MPPED2
cluster_1	chr11_304874_306032	14.1300825445335	16.9771501516334	3.91112275278029	3.1661742042361	11.9443574509077	5.03217804268843	3.20107842071957	3.15707883120194	0.844921808321677	Promoter (1-2kb)	IFITM2
cluster_1	chr11_307777_308442	17.6371743393909	11.5884664795171	1.87466007326936	5.93506445332691	16.5415855626006	13.4618011160077	6.91233173305732	8.18831016713111	0.981571858691881	Promoter (<=1kb)	IFITM2
cluster_1	chr11_3091578_3092389	24.5278106563627	6.19765653070534	3.40274171542073	4.72994846008032	21.7705106943724	4.87613304310488	4.64771197529571	3.97875939379341	0.99994236801232	Promoter (<=1kb)	OSBPL5
cluster_1	chr11_3109807_3110536	14.2967405828046	2.96295811848164	1.26335082936626	2.18997917852197	16.7699072672283	1.25670193323442	1.17803666299755	2.52832433445156	0.999893304205633	Intron (ENST00000263650.12/114879, intron 7 of 21)	OSBPL5
cluster_1	chr11_313388_314289	14.5364645237442	8.64838854498072	3.19562430926238	3.62636710176481	16.8037366320131	16.2255096753556	7.14047441400242	6.37138642272232	0.947421647508701	Promoter (<=1kb)	IFITM1
cluster_1	chr11_3169225_3169991	12.1465836256002	3.88261691128535	3.49753773307633	2.43023418172117	13.9742466279927	5.16147297498081	3.22627418927866	7.995409059078	0.996472989654519	Promoter (2-3kb)	OSBPL5
cluster_1	chr11_3188862_3189891	10.2944289992651	3.11587114886197	2.51017907585128	2.58843455167886	11.2263973613257	3.06049829909265	2.96652483471892	1.75517579257845	0.999973636671519	Exon (ENST00000455154.1/ENST00000455154.1, exon 1 of 2)	OSBPL5
cluster_1	chr11_32312835_32313631	11.6058133245959	2.87278845701263	3.16325052394583	1.77712247595747	10.0997016934568	2.48995262099336	2.04482893256703	3.85818050448969	0.999474589744423	Intron (ENST00000525689.2/ENST00000525689.2, intron 1 of 1)	WT1
cluster_1	chr11_32333305_32334238	15.7235426414482	5.66101862411871	4.2162758990381	2.61358965366319	13.0879566944596	4.76073674090511	4.23201538629325	2.69397397993471	0.999776053007824	Intron (ENST00000525689.2/ENST00000525689.2, intron 1 of 1)	WT1
cluster_1	chr11_32430768_32431380	12.4413641227711	6.48093470812515	6.06351609024671	2.58742214876935	19.4684994583919	8.19414898751539	8.39782119091676	4.84690037739682	0.993024388891246	Promoter (<=1kb)	WT1
cluster_1	chr11_32435513_32436173	15.2819698794048	5.12824436890474	3.78336747747282	1.82510450521427	22.073508582227	6.87242864062	5.12384450666235	3.58537122267582	0.999461936856116	Promoter (<=1kb)	WT1-AS
cluster_1	chr11_33065430_33065998	21.940220361416	4.41864766433501	6.46782325403736	5.24995062548927	17.9649569352958	6.9817173922665	6.63268276197175	4.68217654485293	0.99926661741784	Promoter (2-3kb)	TCP11L1
cluster_1	chr11_3408294_3409118	10.3043217151105	4.11905740995248	1.69758774259769	3.10706231669485	11.0267049602266	3.70899225267372	2.04253214480922	2.7076310144517	0.999970255875297	Exon (ENST00000685598.1/650368, exon 9 of 9)	TSSC2
cluster_1	chr11_35237359_35238528	6.80057585683759	3.10327135062261	1.95336924340985	1.31695591909682	5.69641678655092	3.16372494510583	2.32468766410981	0.876163381307669	0.998590485520746	Distal Intergenic	CD44
cluster_1	chr11_36069826_36070975	11.997811958272	3.96106684535636	5.83503093648123	8.501366773438	11.6697767166347	4.16325651759285	2.94400924796475	4.5198412868658	0.980545071027596	Intron (ENST00000524419.5/143458, intron 1 of 5)	LDLRAD3
cluster_1	chr11_3824591_3825193	17.1416409102564	1.94976517522856	1.97999985722375	4.78914642846339	23.0435894731458	3.25666092154639	2.80752335454679	1.93588887389149	0.999440334003851	Promoter (<=1kb)	PGAP2
cluster_1	chr11_3826512_3827232	13.1529517549582	3.70277371187776	2.80053921217967	2.87464969167153	21.748629018468	0.938627975959789	1.95537902521998	0.776091840228536	0.998198907134622	Promoter (1-2kb)	PGAP2
cluster_1	chr11_393884_394697	16.6753334702347	10.7869721372204	2.00724823646233	2.57371932610574	13.2177274876145	3.4169909599335	2.4302056135548	2.8043968911855	0.993484701456966	Promoter (<=1kb)	PKP3
cluster_1	chr11_406602_407803	15.9124889981959	6.03473019812942	2.41269549734162	3.87711175894056	13.1188554694252	7.90088855808638	4.78119089345648	4.41736646613687	0.999237179086163	Promoter (<=1kb)	SIGIRR
cluster_1	chr11_416640_417822	24.2601179790724	10.3695532543197	3.07282384512558	3.80657053695346	23.7193387371125	7.67793958635615	4.19930965850074	5.62253925265025	0.999956321736203	Promoter (<=1kb)	SIGIRR
cluster_1	chr11_441489_442263	20.5281646692511	6.96478275686987	2.944616606843	2.72835656828649	16.2728092352605	7.15156955196059	3.71094915002575	2.13952970430971	0.999647188995087	Promoter (<=1kb)	ANO9
cluster_1	chr11_44285843_44286784	8.56085915514768	4.09950377772804	2.58323602018478	2.65388156321025	9.84093697694247	6.13071427893282	3.58150540640559	3.94215768707439	0.998828989090666	Intron (ENST00000652299.1/60529, intron 1 of 3)	ALX4
cluster_1	chr11_44319092_44320199	8.18029850250226	7.54759049397485	3.01265632487588	2.27302658213005	12.1858860292307	10.1604354828164	10.0865775460329	4.07009633950211	0.758045769757717	Distal Intergenic	ALX4
cluster_1	chr11_44334403_44335406	7.09065294353477	8.70756546931288	2.28105637574968	1.94542078925097	10.4511189701039	6.25492710959296	2.80900149034921	1.39279296197222	0.92919469099937	Distal Intergenic	ALX4
cluster_1	chr11_44467392_44468304	8.38142126894515	3.97223303281699	2.24061975882746	1.52316807073723	8.50596450506885	5.01942832863204	2.4496922186734	1.61873728017879	0.999175311500239	Distal Intergenic	CD82
cluster_1	chr11_44670773_44671882	15.5228739495846	2.30960441782681	1.24791597065371	0.909228239424666	18.1752101273341	1.52739837709504	0.576359071226687	1.46818648490413	0.999967329949049	Distal Intergenic	LINC02704
cluster_1	chr11_44927037_44927775	13.7126768337143	3.41181771735116	8.41960089808735	8.18709716318014	10.5148519141794	4.64797111063015	5.91226500646816	3.29780534552884	0.942708460282475	Promoter (<=1kb)	TSPAN18
cluster_1	chr11_44943775_44944600	13.4892432601382	6.77101354681868	3.24770382308049	3.35419670951364	15.1568908525407	5.30047769760799	4.51869955668042	2.17706846915991	0.999882531820265	Promoter (<=1kb)	TP53I11
cluster_1	chr11_45091577_45092554	16.0288243724755	3.78194180606533	0.805692290109838	2.61608356306214	14.5105850490162	2.8056553877049	1.77869108778999	3.0865232987616	0.999932884932814	Distal Intergenic	PRDM11
cluster_1	chr11_45816577_45817252	12.9185826985189	3.97450979445998	2.05714537249414	8.60533239744307	14.2822730154261	2.48806350896007	1.46935420729514	1.51406245524525	0.990012992724102	Intron (ENST00000534128.1/ENST00000534128.1, intron 1 of 2)	SLC35C1
cluster_1	chr11_45921684_45922839	46.9071663039124	17.8391617574966	6.17610350782646	4.60388114188317	43.8653157156394	14.9040883359723	15.2835363382275	14.8775247771883	0.999763108488498	Promoter (<=1kb)	LARGE2
cluster_1	chr11_46202097_46203152	9.88370441311221	5.84852933686918	2.66714799321857	2.82165837246257	8.89718374501123	3.06878334035288	1.12409265077102	0.796579381076254	0.996632300181993	Distal Intergenic	LINC02710
cluster_1	chr11_46338779_46339653	35.2275847335201	14.5169599523083	12.0780461410793	12.0360551191126	50.5011984024246	8.91623599571815	7.11307342712142	5.02577630121832	0.998849067850351	Promoter (<=1kb)	DGKZ
cluster_1	chr11_46352093_46352621	19.3691320960834	6.83069957668737	4.67156580509829	5.17671608052682	18.8182052338481	6.13595691914569	4.71142564802893	2.95746840481872	0.999969439877707	Intron (ENST00000343674.10/8525, intron 1 of 30)	DGKZ
cluster_1	chr11_46379502_46380040	23.1010995578696	22.314717132065	12.4442995794676	5.90225265746359	28.1151544364058	26.1672140707907	15.3286927892492	5.45082748364164	0.85348031918232	Promoter (<=1kb)	MDK
cluster_1	chr11_46537189_46538290	12.0889569651704	7.05941487318845	3.77711515354236	8.60453677744088	11.8243412174239	4.74061358577983	3.37940951189178	5.24730911587761	0.987643195839483	Intron (ENST00000314845.7/55626, intron 8 of 18)	AMBRA1
cluster_1	chr11_46912443_46913277	38.0395937927807	13.5828431343801	16.9041573971992	17.6898164751805	32.3709378006768	14.1343887141008	14.4399716652962	7.78160717998514	0.996510817799949	Intron (ENST00000378623.6/4038, intron 1 of 37)	LRP4
cluster_1	chr11_47160967_47161997	18.3911087140528	4.57609798600794	4.24299345200777	6.04245286297411	19.4402035562621	6.66363463415139	5.40686049878461	5.66731328182187	0.999895785637866	3' UTR	CSTPP1
cluster_1	chr11_47185120_47186776	24.9090151720255	12.9698333591303	6.70838174367583	6.20599099299871	26.9899393872629	14.0556510462841	10.6837079860317	19.1936879277606	0.990140808413699	Promoter (<=1kb)	PACSIN3
cluster_1	chr11_47257380_47258241	17.0823129861698	7.84885151251843	4.65696548315724	3.87187588053031	19.7321921759705	10.1211459049	5.86433359160608	5.61336968155703	0.999780896989237	Promoter (<=1kb)	NR1H3
cluster_1	chr11_47259196_47259934	19.0787454395093	8.71987052508661	3.35804737473564	2.25376431930814	21.0151231833245	7.53654981477992	5.0075164891539	5.03757768651323	0.999943347952621	Promoter (<=1kb)	NR1H3
cluster_1	chr11_47399911_47401159	12.8477604067502	6.43187352046696	3.16749554231106	4.70805870558782	16.0004912216721	8.06138688179969	5.17248850927088	4.81628377129521	0.999549747232044	Promoter (<=1kb)	MIR4487
cluster_1	chr11_47564945_47566394	14.4000068369807	9.08934584379461	5.04762946318476	5.76576060315575	15.741761004169	8.33718948129987	7.57484613926342	10.2818706334876	0.996807044132241	Promoter (<=1kb)	CELF1
cluster_1	chr11_47943742_47944670	10.7597088372407	6.4516644008325	3.80060296630589	1.5499323040396	9.85062076926725	5.36759645887585	5.73448652036797	3.14969724721255	0.995071673662546	Distal Intergenic	PTPRJ
cluster_1	chr11_56659628_56660358	7.9597472948638	2.99635818518803	2.20524164537828	0.813832124901566	19.8651481520019	4.49574940763578	4.16015600346343	2.07303033071596	0.986138147866531	Distal Intergenic	OR5AR1
cluster_1	chr11_57364864_57365716	9.10076588221485	2.71104047891846	2.02758241581571	2.53351192425978	13.213459628642	3.39555069905059	2.06413281889075	2.91047638501114	0.999460887200914	Intron (ENST00000263314.3/5024, intron 8 of 11)	PRG3
cluster_1	chr11_57493333_57493997	15.2474702356434	3.57022014281863	2.27370757061397	2.33528136484561	17.3095424668588	2.49218269517074	2.82162192782748	3.16139218237463	0.999956871586919	Promoter (<=1kb)	SLC43A1
cluster_1	chr11_57646768_57647844	25.3502252969466	5.59970773906858	7.36425155642881	4.01560009746004	25.5429773391278	7.05575300626465	5.33730924517685	3.53986459816553	0.999914078028887	Promoter (<=1kb)	YPEL4
cluster_1	chr11_57781282_57781981	21.5282058791506	12.2400114442468	1.72825168158727	1.92354719673779	19.9794172124171	4.53890405876583	4.07959436677682	3.68641053954567	0.998746614778796	Promoter (<=1kb)	TMX2-CTNND1
cluster_1	chr11_57868247_57869242	14.3278154685989	1.60489719552916	1.74302839796217	2.45855843382918	16.4760686746208	0.573340732239107	0.708016470826103	2.64075471453544	0.999632100192035	Intron (ENST00000641215.1/ENST00000641215.1, intron 1 of 2)	CTNND1
cluster_1	chr11_59144527_59145239	12.9375338470828	4.15757371242461	4.59981908288423	3.84536990328987	15.8918147430958	5.22490924909759	6.83129807235891	9.69987673319128	0.990477209708433	Promoter (<=1kb)	FAM111A
cluster_1	chr11_59557221_59557900	25.7681965365244	9.728067873986	8.28001450520331	6.93864059138962	29.5945318199882	6.14292711092122	5.30016762156068	11.9657539760082	0.999255622184669	Intron (ENST00000659845.1/102723575, intron 1 of 1)	LINC02739
cluster_1	chr11_60851793_60853095	8.78519020043223	3.05455945089221	3.0294492865667	2.0566310680412	7.30993878018799	4.25698043048805	3.42829240165587	1.71358982905242	0.998793244725766	Promoter (2-3kb)	PTGDR2
cluster_1	chr11_60950875_60952385	12.4463798413015	11.6296363369289	5.78957037105697	2.01341441279204	12.0203579316977	6.29263245308478	4.5837559010683	2.78206253483361	0.95973239551005	Promoter (<=1kb)	SLC15A3
cluster_1	chr11_61007502_61008924	13.6735417138109	7.83323316221074	7.78539411434307	3.8091586475022	17.4319695017092	6.95714056654729	5.75385833875215	4.04140769477121	0.99846932968773	Promoter (<=1kb)	CD6
cluster_1	chr11_61021472_61022275	13.0600254076483	3.3400850768885	2.01530251993651	1.94104281631754	15.3999574550314	3.19317042053907	1.84373382862324	2.64280691656152	0.999982686876118	Distal Intergenic	CD6
cluster_1	chr11_61482475_61483058	14.8104719038855	3.87061087148628	4.98229427797887	2.67321435861465	14.444307213848	8.08602749567487	4.03939180353511	3.15514136226233	0.999265760513012	Promoter (1-2kb)	PPP1R32
cluster_1	chr11_61541576_61542553	13.3992615613743	4.42770367565007	3.42430318350685	3.71706145936248	17.1224513905792	5.54389980495825	3.09094005521234	5.62848896961199	0.999709088699919	Promoter (<=1kb)	SYT7
cluster_1	chr11_61577664_61578051	15.8960421705421	11.7936054072826	6.62837408486105	3.00921657525102	17.1790045701286	14.9064755784118	10.1295047659449	3.36181827646593	0.940844004089121	Promoter (2-3kb)	SYT7
cluster_1	chr11_61587155_61588949	18.1487519614838	9.80619004125293	4.80290729505038	5.03214762086987	24.8593162977731	10.1152811482619	7.38504898384355	9.41087216792857	0.999003616077544	Promoter (<=1kb)	LOC101927495
cluster_1	chr11_61599418_61600300	17.4910973077687	5.72480175423365	2.11615382964066	2.84619443537742	16.975479957929	5.72662746858444	3.02531936081266	7.00052320410219	0.999730613570881	Intron (ENST00000667359.1/101927495, intron 2 of 3)	LOC101927495
cluster_1	chr11_61626502_61627287	24.899809141121	7.66909586962962	3.30807944377181	3.98669769916247	32.5569996006007	5.17747186239539	5.26515373080815	11.8066425170908	0.998996575144718	Promoter (1-2kb)	RPLP0P2
cluster_1	chr11_61777137_61777804	17.8721479411337	1.48069632194798	1.45348365066248	2.98969472713061	14.4047007280634	3.19931549786594	2.61696339727883	3.80051391133644	0.999364774525271	Promoter (<=1kb)	MYRF
cluster_1	chr11_61834314_61835120	17.0998024016467	2.48441897681764	3.34013581642166	3.63349170520017	14.5010401001684	1.80191210791704	1.71075260427263	16.8154098600971	0.905974508585854	Intron (ENST00000257261.10/9415, intron 1 of 11)	FADS1
cluster_1	chr11_61904284_61905179	16.7727867855824	7.02608121124731	3.81824319542651	4.06999486182717	14.1470404418849	7.4425974430833	6.29510449073642	3.53660065935915	0.999545898264949	Promoter (<=1kb)	RAB3IL1
cluster_1	chr11_61954940_61956436	19.7827499997394	8.21863740834857	4.9635737197156	2.61937229233068	25.8339803570194	6.65286240834681	4.84487283313615	5.24119699035631	0.999874772153492	Promoter (<=1kb)	BEST1
cluster_1	chr11_62560469_62561031	24.2516069687752	9.10711290813932	1.42241405027478	3.62281568407038	26.809315412954	12.8006503432582	8.22596309256789	19.1987232472076	0.982299381180694	Intron (ENST00000329251.5/1937, intron 7 of 9)	AHNAK
cluster_1	chr11_62757827_62758375	43.6325253216749	1.64640690105967	1.22885308203981	1.63329300413066	33.888369932008	1.7005969464923	1.12575376972259	3.0976033905965	0.99964239043705	Distal Intergenic	POLR2G
cluster_1	chr11_62850504_62852130	30.7468369374003	7.38211259939792	2.06899046409309	3.09451943507236	26.7193082089904	7.4032619909012	2.36415172773537	2.1032411919559	0.999963388113601	Promoter (<=1kb)	SNORD22
cluster_1	chr11_62862273_62863154	15.6652397704699	8.11291995973345	5.68740704420895	8.55343104367113	14.878127948346	8.96808400807345	6.76848575262692	4.56019359567828	0.998613043499727	Intron (ENST00000680002.1/6520, intron 1 of 12)	SLC3A2
cluster_1	chr11_62908908_62909992	21.4594941989627	4.63509286110113	2.59013872969998	3.51929123682843	26.489315979429	3.93330566711162	3.58223849238355	7.98156648096365	0.999591501745023	Promoter (<=1kb)	LOC105369333
cluster_1	chr11_62925372_62926098	13.9359845716815	6.33363786231143	2.8594228149564	3.24516252358519	13.3619041987334	5.12163800968057	3.41242372916821	3.19254691632431	0.999968569811246	Distal Intergenic	CHRM1
cluster_1	chr11_6323274_6323758	33.9540593420235	0.259704524397703	0.969653181660544	1.5664587780311	34.0053846887349	0.802312943447687	1.27774150143225	1.82138665916446	0.999889410764427	Promoter (<=1kb)	LOC101927825
cluster_1	chr11_63763813_63764449	36.2734537490986	17.703711016603	19.4392440089173	10.6461962585016	40.5549100596517	22.537414329683	21.9817489940169	9.51740716934787	0.99601371298364	Promoter (1-2kb)	ZFTA
cluster_1	chr11_63882745_63883379	15.773369242005	2.9599643891474	4.20947522180487	13.4363042887577	14.2069948660749	3.55452625777689	3.34627970358709	6.47002338989866	0.92871869809256	Intron (ENST00000377810.8/2011, intron 1 of 17)	MARK2
cluster_1	chr11_63888238_63888949	11.9631297456701	4.76820918570749	2.02380307048425	1.58764102808851	14.284498945088	5.60690381369714	3.30564097973681	5.03972880802011	0.999668527979221	Promoter (<=1kb)	MARK2
cluster_1	chr11_63909540_63910498	25.2827325764165	13.644544810295	9.06274011176342	11.7225228760475	23.7550117064985	17.6725992524995	8.62852867192562	6.37905785693829	0.99569875480216	Promoter (1-2kb)	RCOR2
cluster_1	chr11_63920181_63920511	40.1925048495881	15.8250379268534	9.4279991780134	7.28991704456117	45.6700771693146	22.7595843156779	15.502384388225	15.2251016302764	0.999647721126518	Distal Intergenic	RCOR2
cluster_1	chr11_64249435_64249905	40.5082725435964	4.53666596321454	3.37865089232128	2.94700775225585	41.8012562417114	5.03882177805945	1.27799113532479	1.58231858865499	0.999980163388767	Promoter (1-2kb)	PLCB3
cluster_1	chr11_64340580_64341361	27.1036359841782	8.70840037860843	2.97311845175463	3.74425731615216	32.2813199781415	7.72323309811089	5.23221581103974	5.66173196434359	0.999988049056813	Promoter (<=1kb)	CCDC88B
cluster_1	chr11_64356508_64356911	16.6599873679936	6.57571684829873	4.48972023163614	4.93847707877555	18.6753478845351	8.10366889739259	7.29131858036151	4.83645288135807	0.999931738624506	Promoter (1-2kb)	CCDC88B
cluster_1	chr11_64372782_64373725	11.7299243625701	2.62015826390037	0.919813345934923	3.00819525346078	12.4069206664999	5.29595857615836	2.28489592368137	1.65116187040502	0.999784471005314	Distal Intergenic	MIR1237
cluster_1	chr11_64565274_64566095	11.4147997477198	6.10013178309028	2.57493460818402	3.49002433508928	13.8087445540202	8.36163031803846	3.98546241384161	2.4119600479475	0.997537696591526	Promoter (1-2kb)	SLC22A11
cluster_1	chr11_64629972_64630897	28.2533036058353	4.20693013572768	2.7095015742767	2.85541485136945	25.6418856969001	2.85076243330192	5.02782264407704	4.68143342678923	0.999857545022688	Exon (ENST00000301894.6/9379, exon 3 of 7)	NRXN2
cluster_1	chr11_64652900_64653728	16.5083418932149	7.11317492223771	6.06526124015168	7.73799690205579	19.7226831137886	7.40133904025118	6.60773547873188	5.18141048939106	0.999788468254474	Promoter (2-3kb)	NRXN2
cluster_1	chr11_64711114_64711858	28.4545552417693	6.43043116944705	4.85457110879189	9.41706634675162	25.8284295385245	9.71620878299483	8.11146382000468	4.94573107994213	0.99965769941076	Promoter (<=1kb)	NRXN2
cluster_1	chr11_64729645_64730538	22.1269909687965	5.99193287269727	2.88557535575481	3.85479615677879	16.3867059023433	7.30017446633361	5.41016517775874	2.78808856592396	0.999331381730875	3' UTR	RASGRP2
cluster_1	chr11_64742685_64743340	23.5593887168485	13.0105669812618	7.77342181188654	7.80399055126037	20.2405584376992	11.2854381042891	8.26097297165748	8.12325116486406	0.999621775567609	Promoter (<=1kb)	RASGRP2
cluster_1	chr11_64743598_64743852	36.2316509119271	8.85210408225132	5.07278350441594	5.64818375000993	35.3622983784351	9.38095467108162	9.36592347235007	6.83338828751145	0.99998559005972	Promoter (<=1kb)	RASGRP2
cluster_1	chr11_64744668_64746351	21.177172457607	11.3271107064158	7.92078727208815	7.49476602682072	21.3945524639377	13.4696902321153	10.2031074132711	8.83911087285685	0.999782474963677	Promoter (<=1kb)	RASGRP2
cluster_1	chr11_64759722_64760621	31.2724474511256	13.6695877965809	6.30124737863965	7.4796033421301	31.4809877628217	29.1549599619764	13.7759686945266	14.3166478993123	0.974485226615846	Promoter (<=1kb)	PYGM
cluster_1	chr11_64762433_64764442	20.8771804989162	9.14423184682597	4.59687656019532	3.3211747147671	20.5708201205784	11.9627091291172	14.8426824247112	6.27248090780324	0.98728841505672	Promoter (2-3kb)	PYGM
cluster_1	chr11_64844320_64845089	26.8841242964758	19.1672740625661	6.42280887648771	7.57016774265211	29.5841931151573	13.6335233789045	7.88414853383086	11.858542379586	0.998098117117621	Promoter (<=1kb)	CDC42BPG
cluster_1	chr11_64846962_64847550	37.1364366204302	12.594760658641	9.46876264389649	13.9021389735179	34.399302412877	13.8312600872482	12.2271983079897	14.5182923073041	0.999813228105108	Promoter (2-3kb)	CDC42BPG
cluster_1	chr11_64887751_64888537	23.3912302121654	14.0752511422328	6.96653271099527	5.80476355737234	25.9499018611891	14.385918576904	11.2156283581696	9.90176045494473	0.999123366887372	Promoter (<=1kb)	EHD1
cluster_1	chr11_64996459_64997361	17.2148580691754	5.21756940312614	1.64099725223412	3.19431264429331	19.8599226859352	10.2836016395326	5.48269020011001	4.64623943148439	0.999237850131543	Promoter (<=1kb)	BATF2
cluster_1	chr11_65066454_65067507	20.8906567764705	5.00303896787391	2.39666260407895	2.92507439472688	18.4554515425034	4.35002530967884	1.71230522877231	1.95693416357153	0.999960672925777	Exon (ENST00000529290.5/113130, exon 5 of 6)	NAALADL1
cluster_1	chr11_65184186_65184573	24.8343993766055	6.06192792469245	3.08475127310124	1.5276344918022	27.5375006932222	7.98705036001185	6.09270699107233	4.22064798945652	0.999982312808358	Promoter (<=1kb)	CAPN1
cluster_1	chr11_65204235_65205339	15.8972201336207	3.71188025282366	2.56811521645026	2.74677657121037	20.8817806308366	4.76395640002529	2.60757430032205	2.30251562940818	0.999911945291951	Promoter (<=1kb)	CAPN1
cluster_1	chr11_65213192_65214199	40.0372850036646	3.17619968311728	1.6341500903177	3.10521279063662	37.4477378283648	3.01979781055344	2.40780303278756	3.01117123128321	0.999935626251375	Promoter (<=1kb)	SLC22A20P
cluster_1	chr11_65224894_65226137	15.4122117729379	6.73837161384315	2.82917041528783	4.14705990684619	17.521472050332	9.66974043974929	6.87290478444951	10.253171431834	0.994405122645854	Exon (ENST00000525264.5/440044, exon 6 of 6)	SLC22A20P
cluster_1	chr11_65316933_65317505	23.9316698722027	4.69519243441281	3.41247847319046	3.39004842764105	19.2193816953511	9.68687485369204	5.58312595131438	5.87445176247243	0.999373937941751	Promoter (<=1kb)	CDC42EP2
cluster_1	chr11_65538966_65541238	24.6326622113305	12.7645351294911	7.16913576938083	15.4743523441851	28.8509466739809	16.2978428567279	12.2085755800813	15.371316111444	0.995845253771911	Promoter (<=1kb)	LTBP3
cluster_1	chr11_65553192_65554018	22.3300845137296	11.3210897412075	4.05790240369857	7.21342650266671	20.2658880333588	13.1702049394439	8.53725396655079	2.68362643431319	0.996263462583141	Promoter (<=1kb)	LTBP3
cluster_1	chr11_65586708_65587172	12.6133363527189	9.77045207111804	1.08846744705763	3.63102205324056	21.4031198190927	8.1146449145616	4.00366573430783	2.81103528647082	0.993318224803745	Promoter (2-3kb)	EHBP1L1
cluster_1	chr11_65641897_65642473	30.0406867702791	4.72294748445722	2.36772192096816	3.23771212039813	27.6834107269046	6.66068736473303	6.15873933241829	4.14812108949988	0.999956838264511	Promoter (<=1kb)	SIPA1
cluster_1	chr11_65646752_65647697	26.2086445954337	5.42275076130238	2.51017149259109	2.80728829217557	28.0737484500816	6.23244783665958	4.77159977912316	4.38270870975822	0.999995324556831	Promoter (<=1kb)	SIPA1
cluster_1	chr11_65787858_65788732	17.5938975280621	6.0347992402894	2.21661530623101	2.32338960455963	17.0139290055427	6.56070346734156	2.32848028687785	3.3985738826073	0.999971297355555	Promoter (<=1kb)	OVOL1
cluster_1	chr11_65851137_65851835	13.7121323433448	9.2965581396007	2.94519128829903	2.46721912642618	15.0661022127723	4.34724460226601	3.20639014001834	2.87684696930694	0.998592849403823	Exon (ENST00000526972.5/254122, exon 5 of 5)	CFL1
cluster_1	chr11_65867129_65868484	17.8012355714654	12.8953741043548	4.70553763276483	4.34122010074721	15.3711854387476	9.79370819929446	5.16400431054769	3.60405826906364	0.989994259450271	Promoter (<=1kb)	EFEMP2
cluster_1	chr11_65891817_65892049	39.6660828040466	13.9345445341587	5.68507674626511	7.58149311545505	32.3893581399689	22.1974117253289	11.6535267713791	12.2935375357205	0.997992242807438	Promoter (1-2kb)	CCDC85B
cluster_1	chr11_65945265_65946144	10.0160717245048	10.3463078200336	5.07896842369872	2.61782499393049	13.726539259338	10.2579564635037	4.70593786591647	0.941778426803205	0.914965394060735	Promoter (<=1kb)	TSGA10IP
cluster_1	chr11_66022285_66023046	19.9670436833002	8.64352157794496	4.44447427048899	3.64357560826157	20.5603431073859	9.12775566809456	6.3318210930695	5.2135238823878	0.999966892360599	Promoter (1-2kb)	CATSPER1
cluster_1	chr11_6629681_6631032	11.0615541644742	6.10729518533277	2.22498420853494	2.07241822011026	18.0366753701311	7.67955310099779	7.75145532486182	4.48338560242794	0.990926335656036	Promoter (2-3kb)	DCHS1
cluster_1	chr11_66363939_66364519	26.3100802856074	3.58952095264513	1.88722280968978	2.62433114818651	23.4436790552588	5.69121644876683	2.3883693973493	1.67579185433303	0.999964059687301	3' UTR	B4GAT1-DT
cluster_1	chr11_66370997_66372643	53.5673871013512	25.2775604169385	9.01065738473957	19.8729405440532	54.1829261516929	30.5920026214438	22.2396265338257	14.1920881352757	0.999212313404911	Promoter (<=1kb)	SLC29A2
cluster_1	chr11_66720193_66720810	19.0220800396337	12.3671621628465	3.20469241111263	5.72366019630005	15.5350114544298	7.76658906112118	3.71042056131571	5.5372672964295	0.994684019255409	Promoter (<=1kb)	SPTBN2
cluster_1	chr11_66868653_66869199	22.5332275302057	8.08846589998118	2.64248704678023	1.778653246755	27.6465647150675	7.59911395583615	5.86473374784872	6.81381444958742	0.999897050179683	Promoter (2-3kb)	PC
cluster_1	chr11_66975854_66976389	13.4467332031408	4.37942420385218	3.55340490619251	2.40945005073988	16.109439334711	7.57281263925974	4.95197450835931	5.57428279541592	0.999432808221578	Promoter (<=1kb)	C11orf86
cluster_1	chr11_67053855_67054359	15.1575295221639	5.56719611823027	3.77762894554981	3.2678526784623	15.554671951085	9.21730804951688	5.34073406478559	7.90737550833762	0.998251682267795	Promoter (2-3kb)	RHOD
cluster_1	chr11_67071342_67072125	20.6653092736417	3.92075673732688	1.74640268986581	2.13293521280469	22.8516378951757	5.24550933550426	4.78889785446247	2.88206782138361	0.999983322356645	3' UTR	RHOD
cluster_1	chr11_67081433_67082442	12.7732686491906	4.00255178017369	1.11781768317828	3.66882889632718	11.6915240613357	4.71989752480837	3.10135614499912	4.27766562262875	0.999707641427598	Distal Intergenic	RHOD
cluster_1	chr11_67276941_67278057	21.1798640420101	8.82061838335098	4.21665682194687	3.17252805400184	18.8566788169403	7.20734276834666	6.94491994730848	10.1775378337728	0.998710237058137	Promoter (<=1kb)	GRK2
cluster_1	chr11_67396410_67397181	18.0075429597705	2.00796190913935	1.61720480089248	3.56008650287429	8.64467136275998	4.29606214560203	2.22319193539858	3.41859615758139	0.986458610539092	Promoter (<=1kb)	RAD9A
cluster_1	chr11_67409855_67410518	21.5383570471264	5.87443648803211	2.27589101890915	2.73071085319166	27.6447618094539	3.98421254001193	3.27028586237311	4.09789624278778	0.999932498663897	Promoter (<=1kb)	TBC1D10C
cluster_1	chr11_67415100_67416224	13.7664465603648	4.1300334415746	2.20998798459663	3.42249465019916	14.6651975204739	6.22330363881048	3.04293072091321	5.30275594617396	0.999826180941066	Promoter (<=1kb)	CARNS1
cluster_1	chr11_67436250_67437513	15.5029995092861	2.06792170453895	2.63499764815132	1.40492821195635	12.6152925319148	4.51312173215303	2.68393911568684	3.42151494672182	0.999591852708782	Promoter (<=1kb)	PTPRCAP
cluster_1	chr11_67613943_67614747	15.6059526048187	6.78100312317821	4.01207997014608	3.36636005638058	12.3729622586025	8.20159420989243	5.05201139280172	2.95524209089475	0.998137259608988	Promoter (1-2kb)	DOC2GP
cluster_1	chr11_67639694_67640416	11.85228195241	8.24448732087938	4.63292760246875	3.80730261086059	10.5157018856647	10.5734455286798	4.8897702405963	1.74035502509867	0.940414715587615	Promoter (<=1kb)	TBX10
cluster_1	chr11_67710746_67712048	10.2898251837678	4.46080917490114	1.63577721651484	1.3694610213381	10.3993288992548	4.91868113379318	3.67253310770147	3.03815015791506	0.999741177517812	Exon (ENST00000530315.1/ENST00000530315.1, exon 3 of 3)	ALDH3B2
cluster_1	chr11_67990650_67992135	18.2966278869255	4.46377526394554	2.7355734811377	1.35428634720683	17.9927251288846	5.47604213148403	5.15635978849452	3.82983676075384	0.999958338098487	3' UTR	UNC93B1
cluster_1	chr11_68020562_68021117	13.6799359363021	3.5716917600843	2.95758440199388	3.05358874706478	12.8798230371031	4.45349522506628	3.65684990707877	5.54692699413887	0.999729082474262	Promoter (<=1kb)	ALDH3B1
cluster_1	chr11_68038441_68039265	20.3016479206222	10.9924695789645	3.77813357365004	3.98740450413109	22.0382068675661	10.616109335423	6.352616517535	9.22553925868142	0.999278989037727	Promoter (<=1kb)	TCIRG1
cluster_1	chr11_68040238_68040680	23.7343851810251	7.11051474640684	4.02700801014764	2.71482270524951	17.0423334674678	10.6218302516665	3.55552982119056	11.9128974320709	0.990943766428273	Promoter (1-2kb)	TCIRG1
cluster_1	chr11_68127877_68129099	37.6388827499116	10.7923809832341	7.17890645935129	8.39479443855554	38.4855319407251	18.393942948672	14.8758613919717	19.8151879228757	0.998275148317302	Exon (ENST00000530842.2/105369362, exon 2 of 3)	CHKA-DT
cluster_1	chr11_6817566_6818505	9.31085767676506	2.27878281844153	3.97219819201379	3.19723864366387	5.91605720040917	1.7422272002956	1.24715778862413	2.79515715143842	0.98120764564753	Distal Intergenic	OR6A2
cluster_1	chr11_68209224_68209938	12.525531365903	9.4563745913713	3.50638884863461	5.4374046857206	12.9498509724557	4.59481984310958	4.4430142129427	7.70372815949407	0.991560199158042	Promoter (2-3kb)	KMT5B
cluster_1	chr11_68297495_68298281	12.6793608639343	8.08541759315548	3.67044920858884	4.08127358544242	13.6457771714852	6.91104197529959	5.41562359091577	5.97174422130308	0.999539560610271	Distal Intergenic	LRP5
cluster_1	chr11_68342181_68343191	12.9138703551737	7.71251003865252	2.00750672598761	3.62524047007818	15.9166740027741	4.90169888818758	2.84312074596398	6.46558062773831	0.998552176666703	Intron (ENST00000294304.12/4041, intron 1 of 22)	LRP5
cluster_1	chr11_68446939_68447651	16.2616504192608	7.13138950318724	4.12592607468662	6.62139564608901	16.1562221558667	6.07832071951491	4.94256073295318	5.10236199453882	0.999927652691964	Promoter (<=1kb)	LRP5
cluster_1	chr11_68694466_68695294	16.1642885232999	1.91144599977379	1.4502717303339	1.06344830068032	21.628166690208	0.394081510788785	0.738473621087745	2.03981786304756	0.999721095659292	Distal Intergenic	GAL
cluster_1	chr11_68749854_68751925	26.6834728295037	9.02081335901334	3.25973938250222	3.34418472925039	25.934021259277	9.03845175029951	8.10966643028979	4.44573982172145	0.99996032019064	Promoter (<=1kb)	TESMIN
cluster_1	chr11_68854531_68855857	8.64735139264013	7.33167039765123	2.41123131584451	2.73169913095919	9.27782515948153	5.84136229331904	3.41439321961939	3.35200656951202	0.989386815909039	Distal Intergenic	CPT1A
cluster_1	chr11_69249609_69250593	10.7743851887034	4.31110043174161	2.4523348517845	2.86590852837129	9.6022824524383	5.37226372091635	2.22083661056152	2.97306163799023	0.99971340538961	Distal Intergenic	MYEOV
cluster_1	chr11_69434468_69435008	21.9613907288107	5.76259397615875	2.93123553131112	1.38730028685481	16.6299416600515	6.25685149285067	3.82130258642231	2.39279237292734	0.999646825938106	Distal Intergenic	LINC02953
cluster_1	chr11_69436986_69437581	18.4832529139544	14.156419102401	2.14495180263981	3.22770829260083	20.2112568218634	13.3598626636485	5.96165087015061	9.4276146498462	0.983782124674137	Distal Intergenic	LINC02953
cluster_1	chr11_69521224_69521988	22.1284258977151	3.0548027853084	1.85718020058466	1.22343745038232	30.6807215227408	3.82490228503821	1.77095163658082	0.952065308039072	0.999868533667819	Distal Intergenic	LINC01488
cluster_1	chr11_69638088_69638586	31.9764774328478	18.9782877674577	6.01760330996654	5.23988687675365	34.9194798820751	16.6380208836175	13.0769337126896	11.7602121472721	0.998980577797402	Promoter (2-3kb)	CCND1
cluster_1	chr11_69700542_69701116	38.9309065724261	9.88303723336079	4.08595041536527	2.69504628029357	36.6422044848676	7.88537133460967	8.51403199254073	13.7756740741428	0.999652286717949	Promoter (2-3kb)	FGF19
cluster_1	chr11_69703748_69704971	24.9750847527258	12.8713844694496	6.19617986493194	4.96799630939477	27.0199831750171	14.9970206454295	12.6741581364011	5.15015976611618	0.998078594847363	Promoter (<=1kb)	FGF19
cluster_1	chr11_69984428_69985225	11.8826926371141	5.43487021056758	3.10967500694067	3.01981476302485	12.0934042501273	4.1314785986768	3.11941260205627	2.46972933883373	0.999978043305589	Promoter (<=1kb)	ANO1
cluster_1	chr11_70128383_70129205	12.0231529132781	5.25612584625155	1.59659465509781	1.48758188301611	10.5537613503236	3.33132321581846	2.67187921347547	1.66747578591952	0.999786801145333	Intron (ENST00000531349.6/55107, intron 12 of 27)	ANO1
cluster_1	chr11_70312390_70313319	10.6565625900284	1.04038448080738	1.59526793031376	1.64180835854371	12.0754919167946	3.91884214060313	1.51437491220227	1.99995617346473	0.999826206793876	Intron (ENST00000253925.12/8500, intron 2 of 27)	PPFIA1
cluster_1	chr11_705828_706750	14.4468262593353	5.39058677229194	3.183833318115	3.26112275354792	15.5626352365715	7.90300369632714	5.78199048188561	11.4239645727616	0.98590819628267	Promoter (<=1kb)	DEAF1
cluster_1	chr11_70647072_70647921	17.6156959890514	1.75713520507152	1.02747138708704	1.75586952065113	19.9622041238726	1.83226677458169	1.05967946113367	1.34084306677194	0.999958335342583	Exon (ENST00000429268.1/ENST00000429268.1, exon 2 of 2)	SHANK2
cluster_1	chr11_70713845_70714382	19.5244164218181	5.35602808600494	1.53733944609489	4.39234953662239	22.3362392322059	4.42183691900728	3.90009764264714	1.68926311788991	0.999956599940544	Intron (ENST00000601538.6/22941, intron 14 of 25)	SHANK2
cluster_1	chr11_70814816_70815563	13.9681740529915	5.25386480533076	1.66219669753437	2.04086981919644	14.4216851802464	3.82798504202009	1.9143068390038	3.85585678605704	0.999965061505037	Intron (ENST00000601538.6/22941, intron 12 of 25)	SHANK2
cluster_1	chr11_71245889_71246910	24.2797590355283	4.89948123969306	0.432967768103059	0.628998574204646	30.1663812735978	3.19213463324876	1.20232504808854	2.05747125315946	0.999979860627881	Intron (ENST00000601538.6/22941, intron 1 of 25)	SHANK2
cluster_1	chr11_720533_721250	18.930977956722	7.3155712205596	2.92310638133316	4.03449568549927	19.0908295608755	6.89407209617763	6.20456484155499	2.86311199280373	0.9999524742982	Promoter (<=1kb)	EPS8L2
cluster_1	chr11_72237970_72238799	24.9274435083616	11.4385344184387	5.72922051419535	4.71265367932715	28.1984246089406	14.5324052990361	9.09592722321045	8.53028625389548	0.999672720088447	Promoter (<=1kb)	INPPL1
cluster_1	chr11_72243982_72245215	21.9730567138311	10.952166286228	4.98561817993779	4.09823147131496	23.3547633154315	8.30802093091831	6.26746455201834	3.76051220054182	0.999914635790086	Promoter (<=1kb)	PHOX2A
cluster_1	chr11_72333591_72334219	14.4896329291732	5.53676005202712	1.46416564136829	1.53635281246846	9.97410693760719	4.51640207491488	2.67254337525205	3.43647624357904	0.998154032801983	Promoter (<=1kb)	CLPB
cluster_1	chr11_72417682_72418391	21.9326689141386	4.64517765962777	2.18568571562803	2.06127579615734	28.7679470209534	1.99254840445645	1.57579135805156	1.35365413604148	0.999885857836463	Intron (ENST00000294053.9/81570, intron 2 of 16)	CLPB
cluster_1	chr11_72534621_72535550	6.62346436778946	1.49311433025616	1.25783200408559	2.35582945039636	5.86425723102671	4.86536457269078	1.13052572851015	7.76122611412434	0.798646573442857	Promoter (<=1kb)	LOC105369376
cluster_1	chr11_72584017_72585023	16.4304870437829	4.34009524802388	2.7565735410677	2.92573288548021	13.9573631649359	3.63086180524418	2.54615565242795	1.26894824995039	0.999879275799432	Promoter (<=1kb)	PDE2A-AS2
cluster_1	chr11_72589748_72590762	18.0590478866547	13.4644325587843	4.67507136991047	4.88560681688222	16.9862010684361	12.8263308398117	11.006961609589	5.66027786510452	0.975801207083545	Promoter (<=1kb)	PDE2A
cluster_1	chr11_72764365_72765011	21.1020423843506	6.85067587256432	1.69536176860165	1.55496005482354	23.7144436734539	3.36029465344986	1.37140715687172	1.95658068690457	0.999982057502796	Intron (ENST00000359373.9/116985, intron 1 of 33)	STARD10
cluster_1	chr11_72787154_72787880	20.0593509034102	5.20158439606332	2.42406860658596	1.75200025368268	21.8912948365686	5.82391777363812	2.01723468772693	2.0747791576495	0.999997032995814	Promoter (1-2kb)	STARD10
cluster_1	chr11_73200179_73200931	11.3532856186142	10.4952278588092	3.13546452954636	3.62144152971752	13.857083200763	5.07497244623011	3.53429956813561	3.74641189286449	0.990233552417578	Distal Intergenic	IUR1
cluster_1	chr11_73227710_73228340	11.8404795681404	12.0580066150724	1.75179736472941	0.88238008058637	13.0225382928332	3.12337186771293	1.82791068028915	3.32907920286775	0.970513972544659	5' UTR	P2RY2
cluster_1	chr11_73361767_73362715	41.2360626156612	7.65667735507243	4.32400769548422	2.27633964567172	38.6351231190461	6.16402160554656	3.85869613550887	2.65136047079662	0.999986211194584	Promoter (1-2kb)	ARHGEF17
cluster_1	chr11_73660761_73661820	29.9193717326184	9.4846872728595	7.43935975369241	8.17824808797729	27.8169154951826	13.217989599417	11.6994731098844	9.19664356096844	0.999882017646688	Promoter (<=1kb)	PLEKHB1
cluster_1	chr11_74311198_74311988	16.1228180802651	7.47621399893459	5.77684831658931	5.48569563418073	19.3435324211501	9.60409369506685	9.23598486508005	10.8891861551017	0.996899952610174	Promoter (<=1kb)	P4HA3-AS1
cluster_1	chr11_743615_744569	32.907981703011	2.25171775279131	0.529158121565316	1.40148893838374	30.4050544369556	1.68716876101342	0.839108846567862	1.98363173297325	0.999942950802412	Promoter (2-3kb)	TALDO1
cluster_1	chr11_74849350_74850222	12.1747325922594	3.88250352065406	0.984629360873168	2.26959731931707	16.0068411364268	2.71046219135064	2.74312056757521	2.22199124516502	0.999884269685395	Promoter (1-2kb)	XRRA1
cluster_1	chr11_75280149_75280675	21.5349219940074	5.23637996116849	6.21944467703113	9.61127252898942	18.6717075380818	6.42914678435679	5.52694966715632	7.8082904711762	0.997786856989224	Promoter (1-2kb)	ARRB1
cluster_1	chr11_75331223_75332136	35.1778872933738	2.8131903712819	0.592579938524156	0.487728360628547	6.78660148666839	2.13819741027396	0.920890160010398	1.50940404508544	0.944376387224222	Intron (ENST00000420843.7/408, intron 1 of 15)	MIR326
cluster_1	chr11_75425332_75425909	20.3472278712516	2.47479695320353	1.82954624346973	3.14222478772675	18.3314862633901	3.49799860191454	2.53536445480163	2.06787441170718	0.99991380507335	Promoter (<=1kb)	KLHL35
cluster_1	chr11_75475289_75476018	14.1536790224029	11.658975363459	2.82055163099613	2.30155022974315	10.7325335633399	7.79103746412221	3.27944000294145	2.47746212489049	0.957391679317536	Promoter (1-2kb)	GDPD5
cluster_1	chr11_7548272_7549344	9.96628537866397	1.66295014646564	1.77757432054856	2.00543123169737	10.3709986714182	2.40378431415883	2.52317470399491	4.73565299604272	0.998591635019512	5' UTR	PPFIBP2
cluster_1	chr11_75495936_75496713	10.7942341732671	2.21717134744248	2.38133351211877	2.4991426143447	8.97407728712088	5.08622737619588	2.59050861517419	3.11221569785753	0.999071908656456	Intron (ENST00000336898.8/81544, intron 1 of 16)	GDPD5
cluster_1	chr11_76152113_76152987	14.3421397700582	5.3802621936133	4.19284354250114	2.7208208062521	12.6822564672607	6.33051971242248	4.83702900865406	5.88308074163769	0.99965298316412	Distal Intergenic	UVRAG
cluster_1	chr11_762496_763630	11.6609673192546	1.62097908749446	2.01896275975253	2.96619272949932	13.6850779734747	2.26523696208874	1.24281401617774	2.55762312962558	0.999708225824014	Promoter (<=1kb)	TALDO1
cluster_1	chr11_76455267_76456129	18.7027876833846	16.2450397090404	2.82850428695711	2.25388640317595	21.6369857663165	17.6105764128369	13.7161229401794	5.57898363753454	0.913810065578673	Intron (ENST00000427574.6/56946, intron 5 of 9)	EMSY
cluster_1	chr11_76704091_76704716	16.6089198041568	2.53669084860287	1.65149019506321	1.18095648436421	18.8707048457623	1.78843476938845	2.07915627688178	2.08100055811883	0.999962589857943	Promoter (<=1kb)	GUCY2EP
cluster_1	chr11_7673051_7674584	21.0168028818548	7.45752013669434	7.8948791510661	4.27006983340578	19.3548965807066	10.9123739180442	8.11971822391301	4.77975558791552	0.999281560322293	Promoter (<=1kb)	CYB5R2
cluster_1	chr11_76758984_76759643	8.06120769252043	1.93292298577688	1.28083427395886	1.68893673200774	14.1185551263893	4.38498693306643	8.16656495643804	3.3136604480653	0.966843486232047	Distal Intergenic	TSKU
cluster_1	chr11_77091027_77091628	16.2199787239259	7.17564100003989	3.69126209582483	5.06010762894057	12.9736658409265	4.58410153453961	4.17328287363161	6.79632674365873	0.998508740272396	Intron (ENST00000531028.2/726, intron 2 of 13)	CAPN5
cluster_1	chr11_77147556_77148539	22.0059670885208	14.103959811791	8.31499992138919	2.73249239278932	19.5981283914442	13.5789510452447	8.73333419039544	6.39708262724201	0.991383480295568	Exon (ENST00000409709.9/4647, exon 4 of 49)	MYO7A
cluster_1	chr11_77175699_77176276	19.4762191685355	6.17591429790794	4.99030364907224	3.16031499612844	14.7796396765633	5.80941848326769	2.70363179008172	2.24644927148528	0.999264536452506	Promoter (<=1kb)	MYO7A
cluster_1	chr11_77191855_77192447	19.0857416738491	2.73545231982556	3.06702739325449	1.51928204530823	26.2946900967533	2.9264997243146	2.35719924681201	3.15785250528619	0.999726400282713	Exon (ENST00000409709.9/4647, exon 31 of 49)	MYO7A
cluster_1	chr11_77547567_77548687	10.4007253611295	3.64082294370431	2.64195060933507	2.91300923750562	11.0404175293945	2.48357863335823	2.86494636576804	2.91080588050702	0.999947382187547	Intron (ENST00000526761.5/1207, intron 4 of 5)	AQP11
cluster_1	chr11_78022339_78023607	18.6163800202912	5.52392485170012	3.73445329006273	3.44749993892374	21.1874995808397	5.25126265788012	3.32063064222686	7.93761586897683	0.999712670483541	Promoter (<=1kb)	KCTD14
cluster_1	chr11_783196_784043	29.4118625944389	9.52114985874479	6.4916211632146	11.5724930781535	38.283593195788	15.9195458071408	13.5311214001286	16.4577412980912	0.997731051530295	Exon (ENST00000530083.3/171391, exon 2 of 2)	GATD1-DT
cluster_1	chr11_78594732_78595678	11.5910400491901	1.36507260050709	1.65400294840098	1.42596426022793	12.4939965804119	1.14858464117579	0.906460781388246	1.35725580410422	0.999905707931539	Distal Intergenic	NARS2
cluster_1	chr11_78940382_78940990	13.619906600443	10.2842194157373	6.59142980956106	4.07314110038574	20.2299580188741	7.3959487774572	5.09539713009296	2.68041076694642	0.995162799853484	Intron (ENST00000278550.12/26011, intron 6 of 33)	TENM4
cluster_1	chr11_790650_791330	18.6132373505326	9.95762111918831	5.3728137818849	10.0987304197114	28.0801043287301	16.2068284273923	9.38892029095747	7.24155077190482	0.991944183444521	Promoter (<=1kb)	CEND1
cluster_1	chr11_79485621_79486688	10.9176660361393	2.41446555287763	1.79044526221707	2.62659050637519	13.218954320977	1.99059641581969	3.2084392456023	2.96444639491207	0.999705084139319	Distal Intergenic	TENM4
cluster_1	chr11_79493420_79494096	16.1293486390959	4.10695158965875	4.23167824354335	2.88063843566952	16.6946492558258	3.56563888493422	3.82609854352511	6.76915556418233	0.99947978391493	Distal Intergenic	TENM4
cluster_1	chr11_8218861_8219709	11.8134925249085	2.86263178431397	1.48894732537815	3.40390522676036	9.79171619850876	2.30315315545513	1.87171602019944	1.70287534624575	0.999553292644862	Distal Intergenic	LMO1
cluster_1	chr11_827151_828001	25.1543937770826	18.7285914473908	6.38540601369963	8.51779052570609	22.0918179992965	16.213978653405	12.8929347453435	7.37657683782545	0.983436340312218	Promoter (<=1kb)	CRACR2B
cluster_1	chr11_83723946_83725494	11.0554419612535	4.0863626409974	2.97700448862252	2.29572897577985	10.2003644002634	4.19140271973186	3.00766349241238	4.86385210108289	0.999735644147248	Promoter (<=1kb)	DLG2
cluster_1	chr11_84437025_84438247	19.7437814683341	6.22164010224833	7.68862339241263	5.93445659302905	18.6193764001052	4.93038240387994	4.33194404948474	4.02880577776044	0.999438976203187	Promoter (<=1kb)	DLG2
cluster_1	chr11_84719797_84721381	19.4621825988774	10.7820334309988	11.1619560686029	6.52522063928061	14.2216243202062	6.56906914068481	5.77306170400695	3.89734899294201	0.978306009661906	Promoter (<=1kb)	DLG2
cluster_1	chr11_86571385_86572036	17.1513995866627	3.97792523609304	2.67986858164104	2.80994917990596	21.8134036748719	3.47240046344235	2.68096049114307	1.7093588516407	0.999924909931052	Intron (ENST00000524610.1/ENST00000524610.1, intron 2 of 2)	ME3
cluster_1	chr11_86923962_86924755	16.0081572719301	2.64589273366575	1.92170414562872	1.86991923601965	16.9219701005152	0.915881175481841	0.530847386842223	1.49062605324634	0.999911549830715	Promoter (<=1kb)	LOC107984428
cluster_1	chr11_8698694_8699420	20.9048705120902	3.7987085725589	1.06811799034301	3.02351069622844	16.0290002669037	3.99395289246495	1.92315423628802	2.63418221226362	0.999721994854796	Promoter (<=1kb)	DENND2B
cluster_1	chr11_8700973_8701658	14.3608808216916	2.70401359732636	2.74790670092923	3.0528133371058	19.0450914803808	2.03855185713499	2.82768257526943	3.12615316792374	0.999577439350621	Promoter (<=1kb)	DENND2B
cluster_1	chr11_877535_878210	19.6252625178099	1.29051159297296	3.20680716592491	3.64594855136074	18.8821534380618	3.35617116277608	2.95826634842301	2.62515744202444	0.999716528052824	Intron (ENST00000323578.13/66005, intron 10 of 12)	CHID1
cluster_1	chr11_88103383_88104197	17.6632735941542	3.27722543694569	1.41529867942716	2.2844215573282	14.4217368903737	3.52246720039961	0.668252277999787	1.62924139874385	0.999865735627723	Intron (ENST00000528458.1/ENST00000528458.1, intron 1 of 2)	RAB38
cluster_1	chr11_88300974_88301830	20.0844965882284	3.2463235041066	1.02084398532952	2.71864988445571	19.8495801770953	4.003784659274	1.39428067052098	1.99260905908805	0.999986769547844	Intron (ENST00000678554.1/1075, intron 4 of 7)	CTSC
cluster_1	chr11_88307969_88309067	29.6617378344088	1.43479023503502	0.986186001503433	1.25821766770186	32.4291663957799	1.83788752777261	0.84347570571621	0.482247677226841	0.99996291091185	Promoter (<=1kb)	CTSC
cluster_1	chr11_88508357_88509691	19.1912756559994	9.12748507850165	9.81831525858036	4.03982766774081	14.1790088707358	5.47293091807681	4.86383590407236	2.68221081021233	0.988305510887097	Promoter (2-3kb)	GRM5-AS1
cluster_1	chr11_89293913_89294895	14.3484295744353	11.6534577133028	2.17380742641612	2.29167798163684	13.3176324542007	3.35637300524354	2.92374201480325	0.74185266096834	0.985344063168354	Exon (ENST00000532876.1/ENST00000532876.1, exon 1 of 1)	TYR
cluster_1	chr11_9120722_9121743	12.5763454912067	2.20102412499971	2.0429065634725	1.3873749831751	13.1098894246849	2.58720437323007	1.68344728708668	1.79468181425994	0.999984763923477	Intron (ENST00000534295.1/57758, intron 2 of 3)	SCUBE2
cluster_1	chr11_92311592_92312427	28.8040481564356	4.48314011776158	1.88911343423396	3.95081724288456	35.128528926157	1.4976431467316	0.651473092826801	1.41295523742297	0.999879261644598	Intron (ENST00000525166.6/120114, intron 1 of 27)	FAT3
cluster_1	chr11_9231332_9232237	8.71517370634038	1.90640160524956	3.27966675407212	7.78780207376657	7.07423046102204	1.8833877770961	1.42652051957219	5.44035959095714	0.826356628028369	Intron (ENST00000328194.8/23258, intron 1 of 22)	DENND5A
cluster_1	chr11_92440420_92441395	11.3440940131793	3.97367252961532	1.96409274866332	1.91714792554903	9.0430902259548	2.34767763516018	2.27373705671363	1.12839158636754	0.999625655894533	Intron (ENST00000525166.6/120114, intron 2 of 27)	FAT3
cluster_1	chr11_93072097_93073380	8.71860702577232	1.79054847467661	1.64937947084254	2.32608921266371	12.7658122741237	0.662721836750016	0.489492380270605	2.00151264672782	0.998650866966335	Distal Intergenic	SLC36A4
cluster_1	chr11_93089324_93089927	12.8320199687071	3.99958176201243	3.59780244823096	2.45941271397816	12.8950537858735	5.24364804252593	3.56170629071921	2.65836016388249	0.999977657502207	Distal Intergenic	SLC36A4
cluster_1	chr11_93116562_93117522	16.5737583051533	3.14498970431928	2.72890910934722	1.08684399838434	19.635931018117	2.53266982787355	1.33431583260489	2.17583586496165	0.999954011273397	Distal Intergenic	SLC36A4
cluster_1	chr11_934229_935118	10.7565650332934	2.21008831779696	1.55131774663676	3.41241808214015	11.3398002397308	3.49384311091795	4.80451736799781	4.51418722174731	0.998291664722169	Promoter (<=1kb)	AP2A2
cluster_1	chr11_94119599_94120628	15.9096536947781	1.09491025083762	1.30956759153496	1.38170946293357	16.2524815519928	1.27417646896313	2.14435709670668	1.28125765424009	0.999903004403839	Distal Intergenic	PANX1
cluster_1	chr11_94734410_94735304	21.7472899026519	2.64305975062101	4.76520522209989	3.23570171498165	17.9618715868131	3.24415752022984	4.21771270188379	1.64134967158104	0.999353854909501	Intron (ENST00000299004.13/154810, intron 2 of 4)	PIWIL4-AS1
cluster_1	chr11_95150847_95151964	27.7733043555834	20.7672089621777	14.2670811049487	10.7587779948075	37.0799297280498	16.3989211323611	16.8486985099699	9.04482729550721	0.996334056643612	Promoter (<=1kb)	LOC100129203
cluster_1	chr11_9601106_9601947	11.976196392868	2.69576270859573	2.71416597428983	2.58551929362043	9.18234902109064	3.81639287624246	2.15658500093578	3.27895984430609	0.999319023610639	Distal Intergenic	WEE1
cluster_1	chr11_9607037_9607898	16.2198678894157	3.8079550688188	1.2249226837354	2.71953076674647	17.2903899024814	1.91838802748374	1.00961623541704	2.4058211116637	0.999951180658349	Distal Intergenic	WEE1
cluster_1	chr11_9626776_9627511	17.2575503713862	18.3524470742421	4.71864697816617	1.40251724681267	18.7424035673447	7.67785493224487	4.85314582228717	1.58306746840075	0.95230166068268	Distal Intergenic	SWAP70
cluster_1	chr11_9905480_9906488	9.66447829410205	3.87957581566138	0.61107083404527	1.12579644834276	11.3264668914174	3.06283244578745	2.50660142306654	2.29827543849636	0.999935575685763	Intron (ENST00000533659.1/101928008, intron 1 of 2)	SBF2
cluster_1	chr11_9922647_9923338	23.3731839879023	2.04736446180981	1.10074302918704	0.572994303700702	32.0785893646084	2.96650135511845	1.90467195791137	2.54721324749054	0.999839027005375	Intron (ENST00000533659.1/101928008, intron 2 of 2)	SBF2
cluster_1	chr12_100154652_100155203	22.1162255414483	3.82617222704812	4.13738279296408	3.13703617299347	20.2645860668219	2.48963282793504	2.50016187097923	1.28985578163724	0.999829435445522	Distal Intergenic	GOLGA2P5
cluster_1	chr12_100715934_100717867	15.0470009782077	6.8472514649781	7.42797478144019	4.8104175953869	16.0213857295142	7.93136156858775	6.8608349967119	8.8436082729208	0.99922034592222	Promoter (<=1kb)	ANO4
cluster_1	chr12_100926573_100927191	13.6340373685389	4.25465114606287	4.10232015643933	2.47444128743577	15.4285387825702	5.46560664386111	3.66096670936853	2.29043562026859	0.999948392223446	Intron (ENST00000549155.6/121601, intron 5 of 10)	ANO4
cluster_1	chr12_101642271_101642865	18.5119455362544	6.88025483006265	5.29005713486146	4.96291160064048	13.8141392886892	3.27075892112987	3.15482587719323	2.66746347870924	0.997836756656103	Exon (ENST00000550514.5/4604, exon 7 of 7)	LOC105369937
cluster_1	chr12_102824202_102824976	16.3507623593213	5.42179564446197	5.51517815425552	2.4460152476212	10.8853096178121	6.54341146685682	7.76834068146327	3.16933348431972	0.988275045387891	Promoter (<=1kb)	LINC00485
cluster_1	chr12_102916907_102917921	21.3823607074025	3.52362751799702	3.16523042213909	2.58228657571965	24.7212859138636	3.01724400235475	3.19615564062916	1.75226007265847	0.999946508356151	Promoter (<=1kb)	PAH
cluster_1	chr12_103575281_103575960	17.9042971143641	6.64141975928999	7.2082565657786	5.26927654560025	13.9145022186441	5.76514464869772	6.3761273881688	6.64478714201139	0.998440005080173	Intron (ENST00000654623.1/101929084, intron 6 of 6)	STAB2
cluster_1	chr12_10361046_10361466	21.2516576364161	4.92722480167788	7.85227627776421	5.99820261018459	17.0952431641594	1.98503438124592	2.20930822680314	3.72665603811468	0.995780577973198	Promoter (<=1kb)	LINC02598
cluster_1	chr12_104171750_104172887	12.2749808262963	1.33570838821823	1.94812865355128	1.64519661182442	11.2670193993718	1.1674640343581	0.702389404380197	1.34403323886589	0.999782310706439	Promoter (1-2kb)	LINC02385
cluster_1	chr12_104215506_104216370	19.7647930810936	13.516966806942	7.65465734950422	4.65517111547431	21.9972488760996	9.18012697351643	7.00578503186188	4.81887859656918	0.998658082769821	Promoter (<=1kb)	TXNRD1
cluster_1	chr12_104381637_104382450	12.5849416181859	6.6688462768311	4.15545214764588	7.15960568599576	13.3098989187653	4.79418207597503	4.89828358625745	4.30714149358416	0.998926624211051	Distal Intergenic	TXNRD1
cluster_1	chr12_104506713_104507803	7.7979105696433	1.58764315715945	2.17700426859278	4.5946925684177	5.36455169688172	1.02328706356374	1.84352450002666	3.52191085520182	0.94984215258003	Intron (ENST00000303694.6/50515, intron 1 of 2)	CHST11
cluster_1	chr12_104526308_104527093	12.1596880529404	5.77516323682715	2.64016156261083	1.40003692985357	13.5839008341952	4.63003223098029	1.84329189288623	1.64363995996515	0.999856148328592	Intron (ENST00000303694.6/50515, intron 1 of 2)	CHST11
cluster_1	chr12_104704105_104704947	8.88172973113725	14.2910538746131	4.28509420005712	2.23617371085657	10.3662797066767	5.50757037367918	5.68380874407793	2.25149041325619	0.635427954116222	Intron (ENST00000303694.6/50515, intron 2 of 2)	NA
cluster_1	chr12_104788802_104789417	16.5990164901877	7.95050885517017	3.05954410596858	4.34627322979833	17.2758662217917	3.03758303175017	4.08430168495085	1.8280312269341	0.999585980445673	Distal Intergenic	SLC41A2
cluster_1	chr12_105092120_105093057	21.0745149439379	2.65527359414057	0.814937474170134	2.25989868801959	21.1522482479694	2.85879257454919	2.29885592223262	1.51228276971515	0.999980789926663	Intron (ENST00000652515.1/160428, intron 1 of 22)	ALDH1L2
cluster_1	chr12_107634587_107635769	12.0333279238832	2.97238139374868	1.82284219142096	1.65729802913722	12.7169597684854	4.63350332709406	2.10976634446089	2.9450345889756	0.999978423296496	Promoter (<=1kb)	ABTB3
cluster_1	chr12_108112621_108113672	12.8059000418315	2.77490196152205	1.27583114613792	2.49359097186951	12.5366722872869	4.20106984602334	3.36483085253037	7.10890517982992	0.996945474315876	Distal Intergenic	WSCD2
cluster_1	chr12_108316052_108316960	15.6605726962626	3.10195065139493	2.65436781222346	1.48059849608247	16.1174060342362	2.27631867778892	1.81083409193138	2.66733637687656	0.999963719198234	Promoter (<=1kb)	CMKLR1
cluster_1	chr12_108441601_108442629	13.4200219734685	2.73071300483399	1.44151735037164	2.96396266956848	14.0619411535327	1.65655588609323	0.996104497627198	0.333781519288889	0.999872866031838	Exon (ENST00000502160.6/102723562, exon 16 of 18)	LINC01498
cluster_1	chr12_108588726_108589732	6.68206891210698	4.62234847273709	1.95242735666841	2.25364628680338	6.38026578329201	5.12042921465514	2.37994424105971	5.6651309712655	0.948138385315731	Distal Intergenic	TMEM119
cluster_1	chr12_108768445_108769158	15.6168275541654	11.296838731474	5.0021190954118	3.11917812365897	13.7051301731916	6.65042106151604	3.82960045119493	3.64266325542955	0.993114006348042	Distal Intergenic	CORO1C
cluster_1	chr12_109069258_109070504	11.3090112824493	4.46613696389326	2.00366512796252	1.41126338064508	16.4696531483308	6.39171420182573	4.69400420874622	2.45111938301843	0.998756541651122	Promoter (1-2kb)	USP30
cluster_1	chr12_109458557_109459416	15.3289631644498	13.8634175425487	1.98760880015411	2.49320733975709	19.2454021289101	3.52820458529438	0.713916656231092	1.54735090700195	0.988542125342212	Promoter (<=1kb)	KCTD10
cluster_1	chr12_109832955_109833703	11.898032475338	7.36923739177816	2.00141791710574	1.5296678754675	12.8320012613775	6.62667714280447	2.76373606780253	6.80018036474381	0.994273422092833	Promoter (<=1kb)	MIR4497
cluster_1	chr12_109845148_109845738	20.3132928113601	11.2331704894874	5.28484785478151	5.57079622323797	15.7778171801795	10.8428224911019	5.97772202493434	6.19574060902997	0.996927470122715	Distal Intergenic	TRPV4
cluster_1	chr12_109944931_109945522	28.8919791436231	11.6967868542753	5.55231187499691	4.13982864605752	21.641237710285	12.2895623030154	10.5170465119771	4.9369764581562	0.997783584532877	Promoter (1-2kb)	GIT2
cluster_1	chr12_110244795_110245836	9.80700000372456	3.08663297381463	1.45043110767255	1.15240424173787	12.4214748633357	2.22155256929187	1.2237185968083	0.896294154631242	0.999954766365976	Distal Intergenic	ATP2A2
cluster_1	chr12_110688647_110690160	17.4068959892596	11.4794780866992	5.67852598754216	3.08288352587696	22.2957001657309	14.1685607695506	8.90370099556219	6.28986006581984	0.992398503742682	Promoter (<=1kb)	HVCN1
cluster_1	chr12_110698193_110698824	14.8195155268939	6.62624357663648	1.93636081443422	1.47015886765585	17.6228222516409	7.83828677955163	2.86405816184867	3.16522049802203	0.999643752188376	Intron (ENST00000546713.5/84329, intron 2 of 4)	HVCN1
cluster_1	chr12_110826574_110827199	11.8457507786501	10.888269535861	4.11126860308217	5.6893803574826	13.7415583339857	11.2041015656027	4.7188570320736	4.21892520388178	0.957588881657266	Distal Intergenic	CCDC63
cluster_1	chr12_110846493_110847397	17.0250603108791	8.00938978835342	3.52320541151642	3.12176298614499	19.1793695511964	13.397405879761	7.56238360357843	5.98787356966206	0.994702879493885	Promoter (<=1kb)	CCDC63
cluster_1	chr12_110894239_110894975	13.6743068671099	7.63632963691537	4.0989459677757	3.78025992198	12.6294393288348	6.05425725021977	4.62713943040877	3.36018441536735	0.999668917343256	Intron (ENST00000545036.5/160762, intron 8 of 10)	MYL2
cluster_1	chr12_110936837_110937706	32.2673931984245	5.5939616331161	3.39508191149027	3.40601580471135	28.3025991179181	4.12679427830757	2.51839769711864	1.78834719592031	0.999935324473814	Promoter (<=1kb)	LINC01405
cluster_1	chr12_111412073_111412711	15.36709554467	8.75745667912851	4.94064653180582	7.8909998186184	13.7458940004543	6.481241170836	4.79086509169957	7.2501312209978	0.998086642292266	Intron (ENST00000341259.7/10019, intron 1 of 7)	SH2B3
cluster_1	chr12_112616621_112617508	14.4838000289132	3.77687035369699	3.4905733822664	1.84281491572174	16.2069200524774	1.63353721179658	1.26600660432351	2.21745128362581	0.999843147013895	Intron (ENST00000549736.5/22895, intron 1 of 6)	RPH3A
cluster_1	chr12_112777298_112778141	18.3452048593475	15.2829429145499	2.27524571870053	3.36552931260838	21.9408236815961	8.29814349780285	7.63193212670936	0.974080997635331	0.989068631839067	Intron (ENST00000549736.5/22895, intron 3 of 6)	RPH3A
cluster_1	chr12_113092737_113093724	22.8722826969005	6.45174283759527	2.16921872453893	3.56389891265402	30.8519016213376	6.98580927584576	5.33053495122077	2.62427520145481	0.999884503986184	Promoter (<=1kb)	DTX1
cluster_1	chr12_113103705_113104552	22.2184062602811	3.54516251451885	1.57931122336845	3.48863517968961	18.4238816632542	4.89185202397148	3.67060503419582	1.78055983440803	0.999848003420944	Promoter (<=1kb)	RASAL1
cluster_1	chr12_113135472_113136334	24.9521170767821	8.63612782186171	3.31857294959367	4.51939896213061	24.5503605401775	8.29685387115605	3.41146004783111	2.51475076953828	0.999974511448661	Promoter (<=1kb)	RASAL1
cluster_1	chr12_113152678_113153613	21.496334021136	9.12556506833049	6.33743036791255	8.72538777591668	22.2237522784978	10.6793153483219	7.71042315336117	7.20850405997529	0.999972187084783	Promoter (<=1kb)	CFAP73
cluster_1	chr12_113154316_113155059	19.9105530527002	6.76934074636921	5.01633263750795	5.68742934425475	23.0391064888282	8.81108531961468	5.59199223913687	4.60022995687725	0.999971073696464	Promoter (1-2kb)	CFAP73
cluster_1	chr12_113232839_113233772	17.7769380782899	5.77633437464536	3.30359178239941	6.81062129598155	20.3461725635404	3.62799749338104	2.14057684468324	5.82674520403531	0.999273528914294	Intron (ENST00000552642.5/53373, intron 1 of 3)	TPCN1
cluster_1	chr12_113245477_113246739	22.8612570732674	11.2620676979556	4.86946515786228	6.03413911954981	20.2591124614431	8.23690352411896	6.47732737931962	6.07157275858405	0.999825272446403	Promoter (<=1kb)	TPCN1
cluster_1	chr12_113348800_113349776	9.63384509975644	14.0953419353676	3.22314090051375	1.97173640595177	7.80451310702944	3.38516757667666	2.05291004260596	1.64281096462206	0.656017268281759	Intron (ENST00000549372.1/80024, intron 1 of 2)	PLBD2
cluster_1	chr12_113392882_113393489	18.003016649391	1.98913660097203	1.17456298629397	1.92551828980693	22.4436010229666	2.48642022146886	0.400652024016099	2.31670947414073	0.999906021189019	3' UTR	SDS
cluster_1	chr12_113425440_113426406	15.3295495174126	2.24660916575819	1.07291976174148	1.37815339324685	19.2999266046556	3.49334725759335	2.165380084466	1.52059249462589	0.999955761984736	Promoter (<=1kb)	SDS
cluster_1	chr12_113477290_113477937	16.9117279593	3.53380042869877	4.77283905937757	2.05375597044731	22.0215947152673	12.8194873495484	5.90196877261945	2.37571497020111	0.994925929574594	Promoter (<=1kb)	LHX5-AS1
cluster_1	chr12_114186478_114187220	10.352928373913	3.93576670266977	2.43407392998744	1.99967940347615	12.3238264378829	3.87889604848132	1.30515820766608	2.26774907169175	0.999948113036235	Distal Intergenic	LINC02459
cluster_1	chr12_114668035_114668878	15.1455440370647	6.05585933196558	6.39039348009056	4.77145640620264	22.7489218935382	9.55490786725723	10.738865016745	10.3652912537674	0.989261644443432	Distal Intergenic	TBX3
cluster_1	chr12_11608904_11609547	23.3927394390964	1.97101804720335	2.25690867224812	2.21147136923941	24.5514276118235	1.18553032934646	0.774528743895891	1.30585093616856	0.999907740898463	Distal Intergenic	ETV6
cluster_1	chr12_116426945_116427902	19.2475696153676	16.3011767803568	2.71412835443851	6.08752338628989	22.32679144518	8.9292385013639	4.46599423126502	3.35006599837041	0.991455112449806	Promoter (<=1kb)	MIR4472-2
cluster_1	chr12_117009665_117010539	9.88147410460167	3.58234175789154	1.2948491560093	1.62816668934803	9.48701226717006	4.87514112019237	3.91997240681636	0.968346805617638	0.998994431791667	Exon (ENST00000652555.1/26259, exon 8 of 11)	LOC100506551
cluster_1	chr12_117111364_117112244	12.6462983158729	4.4356807696381	2.16072373218279	2.57641519317275	12.8730120992154	2.9572167728459	1.84805367439972	3.70208523100798	0.999948886887663	Intron (ENST00000547006.1/101928244, intron 2 of 2)	TESC-AS1
cluster_1	chr12_117155113_117155958	41.318335820596	4.6157637600869	1.34721148780565	3.11612482292759	39.9952599367836	5.29561199446864	3.67597230198839	4.67992672762159	0.999974919106617	Promoter (2-3kb)	FBXO21
cluster_1	chr12_117236398_117237107	13.3624862475226	3.5707768682795	2.81143988464088	4.8239299652016	14.9851339059674	4.33992003171284	3.72916582458819	4.9144253654433	0.999740792865248	Intron (ENST00000317775.11/4842, intron 20 of 28)	FBXO21
cluster_1	chr12_117580487_117581208	34.1492157054337	23.9435698895384	8.87127441254533	4.98757740101331	29.8629500517724	16.3724445556704	6.68068692430713	2.95673625194647	0.990051261649543	Intron (ENST00000425217.5/283455, intron 6 of 19)	KSR2
cluster_1	chr12_117628413_117629208	12.7688673413137	12.8298127948705	4.09866436413637	3.43561451676628	18.5897160699857	7.27757574983061	5.699551180268	2.45683504333779	0.982777032725115	Intron (ENST00000425217.5/283455, intron 5 of 19)	KSR2
cluster_1	chr12_118119512_118120354	16.7924617306932	4.90763206643	1.5072650702142	2.3940495388292	20.4934745107997	3.69849947036406	2.0043415769827	2.27261722725713	0.999979550663926	Promoter (<=1kb)	LOC101928274
cluster_1	chr12_118120498_118121457	20.8247349026076	8.57050229507333	2.45378056551415	2.23500260297499	19.7766302603492	6.41938231445881	4.88456741130964	3.8306895255998	0.999943896875443	Promoter (<=1kb)	LOC101928274
cluster_1	chr12_118874770_118875528	19.7466727829389	8.73800119116182	1.45377601283018	2.76963808804987	14.5939578602628	3.7154826932366	2.45964479923618	1.9735114620078	0.998427751707072	Intron (ENST00000544515.1/ENST00000544515.1, intron 2 of 4)	LINC02439
cluster_1	chr12_119088899_119089883	30.7261498455019	8.03355266482391	1.22931706542079	1.89954196159903	34.351659674091	2.40241037998436	1.13187723296334	0.946333030653453	0.999975868051464	Intron (ENST00000267260.5/84530, intron 1 of 12)	SRRM4
cluster_1	chr12_119153365_119154879	36.3359494711763	13.8208846341302	2.74106048030471	2.0340682260404	33.0099758741104	12.6361600534377	8.48246491781483	2.36575838147026	0.999742086778357	Exon (ENST00000267260.5/84530, exon 11 of 13)	HSPB8
cluster_1	chr12_119202052_119202995	17.8243669758226	5.45175322026838	2.12499891921877	3.71875919934906	20.144158114829	4.70515203563432	2.17602905062114	2.63276544068576	0.999985961464804	Intron (ENST00000541798.1/105370026, intron 2 of 3)	HSPB8
cluster_1	chr12_119593516_119594666	9.33461137955044	2.68282751804877	2.88067882610641	1.54031376367361	11.5577175529577	5.53249488683811	3.8135950343146	1.91880541075302	0.998915742250974	Promoter (<=1kb)	LOC105370027
cluster_1	chr12_120093361_120094489	22.8635579706264	14.2830436913164	12.0998489248199	8.53762775835358	25.9937041691517	18.5040305267487	12.195330907444	7.64432149380153	0.994488579045697	Promoter (2-3kb)	BICDL1
cluster_1	chr12_120228280_120229443	38.1121998556786	18.2334299266475	9.87311867317874	13.2555784333822	40.7684706593886	21.6212080073028	20.7329640845401	12.6006588185191	0.999417450462564	Promoter (1-2kb)	PXN
cluster_1	chr12_120928735_120929652	19.0848382067658	5.4925438824323	0.849136262394798	1.31249772936359	14.8935331980784	2.19924324787996	1.03881291331149	1.18317625649591	0.999721842689362	Distal Intergenic	XLOC_009911
cluster_1	chr12_120999072_120999912	17.5312803709001	3.89817047388454	2.04831736338211	2.13256525630209	22.3764924094791	2.52359764055026	1.83465285154623	2.30887098335088	0.999924830139394	Promoter (2-3kb)	HNF1A
cluster_1	chr12_121060012_121060984	10.5827894140077	3.22753014452131	1.44625022608933	0.77384856492175	10.9362491525271	1.61613391243126	0.647782072396017	1.36059822321115	0.999975487903981	Distal Intergenic	OASL
cluster_1	chr12_121132649_121133501	13.5325682730746	2.67912701994736	1.93502114841655	5.53755281701055	12.3222860587414	4.98202032362441	3.57611066081943	13.5020924840735	0.906647481122765	Promoter (<=1kb)	P2RX7
cluster_1	chr12_121230147_121230775	23.430737979945	5.90054077908005	3.35841107117833	2.82234064206043	16.7275894188183	3.51274206302715	2.71960585420219	2.47642536780862	0.999309315975778	Intron (ENST00000359949.11/5025, intron 9 of 12)	P2RX4
cluster_1	chr12_121238452_121239288	13.4664467563627	4.68077317037505	1.5693554551478	1.81723066053295	15.4988208654296	3.3237199908495	4.10950176362288	3.54864180719934	0.999937885971234	3' UTR	P2RX4
cluster_1	chr12_121443195_121444074	19.9077237687716	6.21141982582477	4.04120385268174	4.83825881551816	15.9747184376265	6.49224581072162	6.09810727789762	5.42297676940558	0.999719235075786	Promoter (<=1kb)	MIR7107
cluster_1	chr12_121576686_121577504	29.5897802874652	31.8112413699665	5.51615701495677	3.17754378362111	35.5978895946189	32.1593805542992	24.011993929808	7.72274580961157	0.803207583354323	Promoter (2-3kb)	KDM2B
cluster_1	chr12_121582542_121583185	22.3926555695482	13.0360923391845	5.33151823638727	7.56741058274665	23.7135216736126	11.6890187822019	6.8791474239601	3.84611652235779	0.999207469942072	Promoter (1-2kb)	KDM2B
cluster_1	chr12_121663695_121664322	43.415803095386	9.72848935739602	4.31455667416668	3.54036382090658	40.738105666325	8.93533640897012	5.813578045515	2.25639572288185	0.999990635763747	Intron (ENST00000355329.7/283385, intron 1 of 5)	MORN3
cluster_1	chr12_121671933_121672927	22.2933956378424	11.202877213411	4.36777449064092	6.19675298718055	22.6416625702288	6.61024440118345	4.42637505982963	4.90139995175692	0.999852152002846	Promoter (<=1kb)	MORN3
cluster_1	chr12_121811324_121812921	25.1163163063392	18.501365536083	9.16524000185712	11.673821626507	27.5996240670798	22.9706268246815	13.2712536693646	12.3405220901412	0.985149581292944	Intron (ENST00000604567.6/23067, intron 6 of 16)	SETD1B
cluster_1	chr12_122063626_122064610	24.6811875517093	14.1994127312372	8.25821220853719	8.79464393123511	30.801767956316	17.3336132228256	11.5341296602874	6.00720066679926	0.998190121733583	Promoter (<=1kb)	LINC02985
cluster_1	chr12_122137249_122138169	14.3164508271966	7.05504990198851	2.71635438618708	3.26447963620941	24.0356152187693	6.32276851295882	2.73578808179367	2.43154979941794	0.998457283229956	Promoter (1-2kb)	MLXIP
cluster_1	chr12_122751232_122751854	18.1675633966617	6.20373787801787	2.48293851292306	2.85811705675013	17.6976182755639	9.01599714329082	5.98618462584813	2.82384136642728	0.999663668251057	Promoter (<=1kb)	DENR
cluster_1	chr12_123401906_123402599	13.4122979201554	5.51948804074222	1.24626195397488	1.37333834419564	16.6835644259385	5.36994135638386	5.7148466312651	2.8120631172818	0.999527487718482	Intron (ENST00000402868.8/387893, intron 5 of 7)	KMT5A
cluster_1	chr12_123761759_123763486	17.724199653668	6.78997970020889	3.76772842156964	4.50478032221025	18.454410526437	9.4014971535805	7.94231257058898	6.03977084195901	0.999725251975876	Promoter (<=1kb)	DNAH10
cluster_1	chr12_124500277_124501485	16.5897073953047	8.44076956036835	3.64201719959564	5.95156440979888	17.4067738720263	10.7878497657707	7.76069138502473	11.8508445126731	0.991473929900887	Intron (ENST00000404621.5/9612, intron 1 of 46)	LOC105370047
cluster_1	chr12_124734148_124735058	14.2876166011369	7.63831317396694	3.56043626325111	3.51621143731656	18.2177632292174	12.1916855814745	8.62571178805571	4.36194828158903	0.989707657734656	Distal Intergenic	SCARB1
cluster_1	chr12_124992857_124993216	23.6048018748948	8.87437869594524	8.04623553659635	6.95741839837978	20.9699592141172	13.2322451129215	10.6145821587915	5.91022180588522	0.99892110960217	Promoter (<=1kb)	BRI3BP
cluster_1	chr12_125236685_125237512	13.2029536253674	2.0232031063991	1.02245888479218	2.24051532080168	16.2266522100527	2.66537902476009	0.981225445011016	1.7062383224071	0.999929687045598	Intron (ENST00000682704.1/114795, intron 1 of 8)	TMEM132B
cluster_1	chr12_125280429_125281379	16.3073206020532	5.51266442659677	3.42571076654073	2.3804974786788	20.5387311788907	5.94782638280694	5.187637180536	2.48894789018524	0.999909459441142	Intron (ENST00000682704.1/114795, intron 1 of 8)	TMEM132B
cluster_1	chr12_13028717_13029659	9.86810121370425	2.83744117591675	1.65667409488837	1.50772596216454	11.4917646699852	4.30446238996552	3.12445800877123	0.835515566677132	0.999835487969835	Intron (ENST00000543321.1/100506314, intron 4 of 4)	FAM234B
cluster_1	chr12_130818629_130819479	17.7682354967367	7.01767738555521	6.14716564517453	4.01745485460797	18.2982104030623	5.23449230180957	5.46589722351785	3.34811015242213	0.999908928730386	Intron (ENST00000392373.7/2054, intron 3 of 10)	STX2
cluster_1	chr12_130853304_130854075	28.1703834262841	3.27790756117066	4.06025501332602	1.75229762506974	38.6701750346092	6.45724278823218	3.37781786878242	1.23949083552161	0.999805072127243	Distal Intergenic	STX2
cluster_1	chr12_13087772_13089216	14.2725950324672	1.7028776535757	2.59654116660718	1.87149345457026	13.6663544611286	1.53465045443032	1.78595792543956	1.52429825967986	0.999827195485874	Exon (ENST00000651961.1/83445, exon 3 of 7)	GSG1
cluster_1	chr12_131223730_131224941	26.1170072563447	1.41173312375674	1.56014112808663	2.09768658103359	34.5090858487827	3.06737604497372	1.45428605039794	8.53425920605294	0.999206357279694	Intron (ENST00000536191.2/116437, intron 3 of 3)	LINC01257
cluster_1	chr12_131624636_131625286	12.9675813860124	6.08831348327194	2.59474914442654	2.57077422678855	15.3471519596893	5.33379730018838	3.33290084903259	4.17182221762298	0.999946191584435	Distal Intergenic	LINC02414
cluster_1	chr12_131681976_131682829	35.8527849588401	5.87036820210302	4.49888690584458	3.09300628731192	18.8154383595523	6.70815911804946	3.38067974670423	2.93143891061391	0.994613918246795	Distal Intergenic	LINC02414
cluster_1	chr12_131723375_131724010	19.1034113731734	0.779314771590632	1.51412877212444	0.680561235422836	19.2924834586909	2.35627753120381	2.18176916887462	2.65864581972333	0.999901227063989	Promoter (<=1kb)	SFSWAP
cluster_1	chr12_132275074_132275557	18.2059516637275	0.975661390291584	3.76554127147416	2.77512268995035	17.1141677645814	4.33967643534645	3.92652830398369	4.31931433539141	0.999391124762284	Promoter (<=1kb)	LOC100130238
cluster_1	chr12_132436914_132438133	9.12041581579203	1.67306184589305	0.861393185264057	1.85056482709465	9.9393455393113	1.64306870642929	1.83324741278322	1.30073398201997	0.999946431886622	Distal Intergenic	FBRSL1
cluster_1	chr12_132549893_132550797	12.5629611251184	12.5442488676574	6.44788903783855	4.23212552663939	17.1043845438236	13.0298028529196	8.97955394821553	5.48779369517481	0.934711754610282	Exon (ENST00000624087.1/ENST00000624087.1, exon 1 of 1)	FBRSL1
cluster_1	chr12_132581978_132582503	13.8747401677428	6.75627094733911	4.90602714535377	2.23203087361217	13.6985374178551	10.4160741703834	5.68549523666451	2.05956495541048	0.990732719483332	Promoter (<=1kb)	MIR6763
cluster_1	chr12_132618247_132618949	18.6264207292457	4.73771664356949	2.18944996521105	4.94128068448659	13.5266324933834	6.72805547839965	3.83834705959641	3.14391815961835	0.998761480591547	Promoter (<=1kb)	P2RX2
cluster_1	chr12_132768230_132768893	15.7954134040636	5.80543551719614	2.49796786713501	4.00069754201437	14.1594981443722	6.29045897897287	2.67533799149404	2.77382064632403	0.999868419110618	Distal Intergenic	ANKLE2
cluster_1	chr12_132888811_132889351	23.3909414671815	1.23018846484485	0.686729926469464	1.79688153607124	24.7319104762579	2.53317830664545	1.85842988597822	2.13614329617397	0.999951331208938	Promoter (<=1kb)	CHFR-DT
cluster_1	chr12_13749226_13749967	17.9807400629316	11.4673951371342	10.3471323560126	5.16587553657068	28.3194470129917	7.56629861562859	5.17984195320695	2.35833406388978	0.994067610735181	Intron (ENST00000609686.4/2904, intron 4 of 13)	GRIN2B
cluster_1	chr12_14567293_14568365	19.3729505304934	7.3669363078095	5.19735786592437	2.38271375320722	21.8295451101784	8.59957437814875	6.36424663470211	4.46591323324222	0.999927413643564	Promoter (<=1kb)	PLBD1-AS1
cluster_1	chr12_15001643_15002502	12.2989761382371	2.44699552822155	6.9391498361082	7.2505160612424	8.18179381599928	3.49987528369086	2.6229840664521	2.32255978120002	0.923899862540412	Promoter (<=1kb)	LINC01489
cluster_1	chr12_1662672_1663522	27.396785062455	3.98312770794612	2.63898078794582	2.02590256851366	28.1239058751676	5.52647632507875	3.37835451330849	1.93125348872476	0.999992962875969	Promoter (2-3kb)	MIR3649
cluster_1	chr12_18454278_18455015	10.6042228088385	5.10803756128305	3.28251534071518	3.25036981327484	12.2794674729618	2.57514647469197	7.05064577038244	2.44153179908799	0.994753736509764	Intron (ENST00000676171.1/5288, intron 18 of 32)	PIK3C2G
cluster_1	chr12_2135467_2136463	11.5200097350717	7.29774690126099	3.85058225094099	2.90479950715601	10.1855323566083	5.89814229114865	4.11442964730048	2.12770684934102	0.996527323429884	Intron (ENST00000682544.1/775, intron 3 of 49)	CACNA1C
cluster_1	chr12_2183621_2184547	7.29553530476699	2.03824005014761	1.90908434733077	3.63256652307321	6.24087715656429	5.25493040710746	2.56232571121826	4.98646282475286	0.961609860930766	Intron (ENST00000682544.1/775, intron 3 of 49)	CACNA1C-AS4
cluster_1	chr12_2197975_2198859	23.1387507205543	7.61597196393002	5.11899608633647	9.12124705249627	20.5462016678391	6.99226922091766	7.2191793488235	2.58800202922966	0.999014216835231	Intron (ENST00000682544.1/775, intron 3 of 49)	CACNA1C-AS4
cluster_1	chr12_23585319_23586206	16.0438737628517	4.0511984689087	1.13643017530969	2.2585608494199	19.6626789787304	1.36019661260366	1.26445212151844	0.539736158668112	0.999911439830135	Promoter (<=1kb)	SOX5
cluster_1	chr12_2624493_2625563	9.80229738687395	3.12626250311211	1.82571753776514	2.41580531941883	8.40000095399636	3.49805023528514	4.32045935421439	3.83752872029816	0.998900096747277	Intron (ENST00000682544.1/775, intron 30 of 49)	CACNA1C
cluster_1	chr12_2783783_2784583	12.4844985257485	6.06940804087978	4.51734708428396	5.94881680512056	8.61718233730162	5.4434163229857	3.23999281139162	5.03865752350286	0.990553012152701	Intron (ENST00000636122.1/283440, intron 2 of 5)	ITFG2-AS1
cluster_1	chr12_2845737_2846746	24.2611281882366	8.59862503054003	4.47212876875789	6.53041749503958	24.5565343364079	10.7310963143782	7.37072183901479	3.95856317341863	0.999937315615331	Intron (ENST00000644123.1/55846, intron 5 of 6)	ITFG2
cluster_1	chr12_2853507_2854026	25.4903804883464	10.7062622137429	5.46990545237441	7.29305835572611	18.696277683869	13.3063655109516	8.2708295889854	9.23804048312862	0.997053928360069	Intron (ENST00000644123.1/55846, intron 5 of 6)	TEX52
cluster_1	chr12_2944387_2945143	14.6542738329058	3.35698092747541	1.87665644792125	5.18407942276275	11.1730041960881	4.46314293871322	3.00392887975936	3.1329960801453	0.998425382756436	Distal Intergenic	TULP3
cluster_1	chr12_2963679_2964338	25.043767230502	4.02537690182986	2.04395091478886	1.22520828139327	21.3455227260713	2.83848251653477	1.27119166140424	6.75480373713535	0.999566485618154	Intron (ENST00000358409.7/7004, intron 2 of 11)	TEAD4
cluster_1	chr12_2998698_2999682	18.8305950630129	4.95855041999553	3.18698664614708	5.93649844951823	22.1379399384734	4.51911397038565	1.82830686073769	3.15382905386027	0.999802860029604	Intron (ENST00000358409.7/7004, intron 3 of 11)	TEAD4
cluster_1	chr12_3083843_3085202	11.693753851653	2.50180008572892	1.01534338094065	1.94332257019638	15.9434704498396	3.40748982521982	1.92779952401171	1.71996199517907	0.999866060781029	Exon (ENST00000539631.1/10867, exon 2 of 2)	TSPAN9
cluster_1	chr12_31732980_31733700	19.662819509074	5.21855604304537	2.29398315867721	3.52840933245177	26.5333192725576	6.07950510010389	4.16833014739163	2.50532368764598	0.999883504870475	Distal Intergenic	AMN1
cluster_1	chr12_32013249_32013938	15.7975064704606	2.24450985636248	1.29671640880884	1.11900508280792	27.5513645942778	0.566763527554808	0.232476184597399	1.31927257706379	0.998681429810743	Distal Intergenic	RESF1
cluster_1	chr12_3397508_3398367	11.1195396775539	6.71043893275039	3.18501168136436	1.75704864144149	10.4957900307504	4.93938263644546	1.83253105162255	1.84456264012962	0.99805107903098	Intron (ENST00000452611.6/56341, intron 1 of 9)	PRMT8
cluster_1	chr12_3456565_3457285	7.95071724177704	14.5755606477174	2.77791664974623	2.70606820643979	11.2913474538591	5.37530106459613	2.63514416795023	2.59232882304478	0.704578011712722	Intron (ENST00000452611.6/56341, intron 1 of 9)	PRMT8
cluster_1	chr12_39122205_39123215	12.7609836389834	4.80485570151899	2.68685166772649	1.66910831417352	11.9364544324557	2.83735988117243	3.20606379092903	3.1797915309778	0.999923723064819	Intron (ENST00000662938.1/105369730, intron 1 of 2)	LINC02406
cluster_1	chr12_4024942_4026259	27.360164328092	14.9000321392933	3.90312640667037	2.30438104473991	27.98251227481	12.8184138721054	6.95316239677181	3.33944971774219	0.99904600326295	Exon (ENST00000669712.1/105369611, exon 4 of 4)	LOC105369611
cluster_1	chr12_4203733_4204624	16.0381621704781	1.64168327586805	0.0826845748212968	1.00441542849534	16.8462460936149	1.32899717921061	1.3706689580857	2.23083816028992	0.999955168016296	Exon (ENST00000689188.1/ENST00000689188.1, exon 1 of 2)	CCND2-AS1
cluster_1	chr12_4379185_4379826	17.587145095151	12.0663973987026	3.20204363527796	4.27562636285015	20.7335369015374	11.6487979589484	8.18482226004291	5.72196412973872	0.996297467396383	Promoter (<=1kb)	FGF23
cluster_1	chr12_4450236_4451265	8.36076738683715	9.41982083520514	3.20692597335333	2.11927265466698	13.7936714178915	6.6522109490879	3.44283861099701	3.06922168672426	0.969197593217151	Distal Intergenic	FGF6
cluster_1	chr12_45235120_45236054	12.7384912633738	3.99579479559776	2.29631995573162	4.02660383385201	10.1179617148631	3.75087325261764	4.34221554821332	7.96293011760239	0.987773657902562	Intron (ENST00000426898.2/196527, intron 1 of 17)	ANO6
cluster_1	chr12_45433288_45434044	11.7832380586027	4.54429254761259	1.76931021973953	1.41932672468551	19.389321819288	5.30441255521014	4.74575740151691	2.0635232484751	0.998367679514005	Intron (ENST00000425752.6/196527, intron 19 of 19)	ANO6
cluster_1	chr12_46357270_46358331	11.7013654374526	3.60341706209083	2.12616862984173	4.02094036381605	11.9191436459488	2.17922550481991	1.99168301591454	5.10671227523942	0.998707373980093	3' UTR	SLC38A2
cluster_1	chr12_47193767_47194509	12.8947467349612	3.00594809732823	1.93241958339724	2.8453945742348	11.3787969561166	3.9306034826038	2.52222623823395	2.05000069243543	0.999935515939054	Intron (ENST00000432328.2/91523, intron 2 of 2)	MIR4698
cluster_1	chr12_4720041_4722032	7.76701989616019	2.26210697163954	0.93792395812716	1.3205086798592	11.443537066708	2.15373108354696	1.26170430792365	2.25382558535293	0.999568729917148	Promoter (<=1kb)	GAU1
cluster_1	chr12_47222622_47224054	19.1837650298507	2.35147966148925	2.4674110977703	2.50612469038512	17.0651449119682	4.41223342888628	4.01626222783612	2.42519622343081	0.999871995541395	Promoter (<=1kb)	PCED1B
cluster_1	chr12_4763432_4764196	15.727805485028	4.13017143078424	2.24658768871176	3.22295300588616	17.8632147619607	6.47739966829402	3.46501299270334	3.12743527930137	0.999971300693683	Promoter (<=1kb)	GALNT8
cluster_1	chr12_47636949_47637767	16.5979125292058	1.40074613367051	0.740399592903528	1.38186155125602	15.5992789474179	1.47706111823796	1.14618620213136	2.60878743444076	0.999889784957854	Distal Intergenic	RPAP3
cluster_1	chr12_47717445_47718251	17.2715506925392	4.1475470849667	6.42663521359197	6.63523045156292	16.554633825736	6.57637587456483	8.38996135656749	17.7938889084033	0.892664637939568	Promoter (<=1kb)	RPAP3-DT
cluster_1	chr12_47753288_47754015	15.0571407402971	3.65926686601444	2.34463724773742	1.50767080092082	13.3678032556313	2.55649068447512	2.26669016496095	4.65353837449971	0.999717142897652	Promoter (<=1kb)	SLC48A1
cluster_1	chr12_47778868_47779999	19.814305993377	9.53577387988648	8.34177439462839	9.39585121068301	20.7795369960461	10.4057381962132	6.78107475527805	3.55744864621302	0.998754858702754	Promoter (<=1kb)	SLC48A1
cluster_1	chr12_47904511_47905795	25.9172932821623	11.8975643093453	12.0349838595617	14.0608584105652	27.4434296930721	12.3910755071697	13.9542810913218	23.2693302647105	0.971359241340506	Promoter (<=1kb)	VDR
cluster_1	chr12_47941897_47942955	11.8160955067541	4.00290361338605	3.68416675527545	2.02435137203261	13.4239330472867	4.05640478847658	3.22172940958032	4.57410012366928	0.999883041539692	Promoter (<=1kb)	VDR
cluster_1	chr12_48021593_48022328	13.8648436963754	5.54294217348881	3.23552627079036	2.40495781558115	24.9248389334441	5.32250298356551	4.15028784369934	2.23541449944522	0.997813702903294	Intron (ENST00000546738.1/105369750, intron 3 of 3)	LOC105369750
cluster_1	chr12_48037186_48038144	18.1512853179767	10.2706066420106	3.66677778446114	2.10375404165548	21.3670754797779	10.5850273577202	8.09482594752382	8.71260914768272	0.997526328648138	Distal Intergenic	LOC105369750
cluster_1	chr12_48883089_48884287	10.4485114309909	14.8784804830854	4.80702985465371	3.77682448328451	12.5894729987277	9.72731088541744	6.4523781302496	3.30001391244673	0.719924965711322	Distal Intergenic	RND1
cluster_1	chr12_48924540_48925994	17.4100179671729	3.21103481574275	2.13584229445262	2.91047183395147	18.6109662749486	6.80395158796721	5.69234532503531	7.71989854261812	0.998980837960367	Promoter (<=1kb)	FKBP11
cluster_1	chr12_48965074_48965883	21.397049418723	3.62389910386847	3.11366679718662	2.22886415938331	20.3110097666466	1.63420460104671	1.89161824014858	2.63095498697927	0.999895035399443	3' UTR	WNT10B
cluster_1	chr12_49347562_49348109	22.3915002451031	13.4607195128827	9.0497794288327	6.40004386336886	20.131662820257	14.1435075758066	13.4422156745666	6.26959096427521	0.991745137127197	Promoter (<=1kb)	DNAJC22
cluster_1	chr12_49548849_49549648	14.8401590875841	9.68103103722997	5.39668635891018	2.56429309095729	15.6152977199807	6.43695530154776	5.2220288895958	3.65496957649736	0.998682098907211	3' UTR	KCNH3
cluster_1	chr12_49698502_49699514	25.2406340291502	5.13490945077843	2.30993314816216	2.91208938527377	20.6446567425481	6.61432400591337	2.68349448962024	10.9891024637488	0.997860572085455	Intron (ENST00000335154.10/91010, intron 1 of 25)	FMNL3
cluster_1	chr12_49909598_49910798	13.8289595544917	8.84756718149174	4.39579414742637	3.36861699163609	13.0991484930797	7.84195349933841	6.54557302178642	2.95021793426395	0.9961824512186	Promoter (<=1kb)	LINC02396
cluster_1	chr12_49959627_49960226	13.9094936344873	12.080871467307	4.14994830903337	4.02877870581416	11.0653910509194	6.16431050499231	4.28440739084948	5.4488254050391	0.965288330438599	Promoter (1-2kb)	AQP5
cluster_1	chr12_50032520_50033675	13.4477998459001	8.24373144864908	4.10142127100146	2.25809282058858	11.7615124745746	9.45522183983621	6.12363913964988	2.58616011388784	0.983902349602815	Promoter (<=1kb)	RACGAP1
cluster_1	chr12_50039025_50039644	13.1390758871663	6.57094636452335	3.79973879103014	5.77945302395163	14.4903685986358	7.16689016083401	5.31523429126096	4.58071744356738	0.999907490991531	Distal Intergenic	RACGAP1
cluster_1	chr12_51351797_51352444	15.4507258167899	5.52255203824104	5.0868913587446	4.57294582596566	11.6922567194573	7.02298075176257	4.17274897067497	2.38135982068624	0.997877720146216	3' UTR	CELA1
cluster_1	chr12_51390899_51392946	18.7794938182062	7.43204179593829	2.87363080277749	4.04921124528605	21.2710756695384	8.86820948759771	6.22788864419944	3.9944365141832	0.999925673621257	Promoter (<=1kb)	GALNT6
cluster_1	chr12_51531525_51532373	10.5873066154021	4.64333601275108	5.01520843927021	7.32410753726378	14.0531768346288	5.68733130849439	4.39603870997345	4.61655233372432	0.995837742679519	Distal Intergenic	SLC4A8
cluster_1	chr12_51855752_51856632	19.025418457434	10.3188847875661	4.23001153296107	1.69341295437979	20.9642337312255	11.1663554124317	8.1905630858428	5.4239795626035	0.998225889031055	Distal Intergenic	FIGNL2
cluster_1	chr12_51887842_51888532	13.6225228155251	4.61321624221835	3.51002627374378	3.33589882990133	18.4515967918723	6.79817888037118	6.43284101911393	3.51697835680704	0.999296152182337	Promoter (<=1kb)	ANKRD33
cluster_1	chr12_51923038_51923901	13.1083768105351	4.31999594214984	2.96841673039127	2.72598422420463	11.3117468751548	6.83790197202448	3.09644374724531	2.93219218466731	0.999463067312176	3' UTR	ACVRL1
cluster_1	chr12_52119695_52120446	18.8892496226893	3.53959298097368	2.17688512370037	2.2159963578782	24.8987288047798	5.90964839371814	3.56739718058605	3.23189107147958	0.999896701121087	Distal Intergenic	LOC112268096
cluster_1	chr12_52125085_52125959	18.2664355242253	4.8499097751234	2.09575333464159	1.62007362533497	17.9518211486958	4.34532851143907	4.50745439358311	0.86702229798671	0.999964684888821	Distal Intergenic	LOC112268096
cluster_1	chr12_52200349_52201155	11.0611537275555	5.60436307229365	2.6601873530533	2.87525381631716	11.2219082223843	3.58030931147787	2.21485125385295	2.1074616343598	0.999858679603171	Intron (ENST00000640420.1/283404, intron 2 of 2)	LINC02874
cluster_1	chr12_5221744_5222575	7.7846316000226	6.40738453807792	3.7449917769923	1.42609775435195	18.4213647248468	4.45204345931877	2.3931088270185	2.70400267206843	0.983525410673298	Distal Intergenic	LINC02443
cluster_1	chr12_52232574_52234262	14.0893909753441	6.85086860822828	2.58318273707526	1.73783865084154	13.8613819040426	5.64128355005058	4.45087091973906	2.01366508552133	0.999693764897936	Promoter (<=1kb)	KRT7
cluster_1	chr12_52250193_52250922	10.9858160534665	5.99623994697831	2.4014945446041	3.30533453957183	9.74722465980119	3.73650155448353	2.29193821865823	2.81957985262247	0.99933164396037	Promoter (<=1kb)	KRT86
cluster_1	chr12_52496334_52497162	10.369499451676	4.5085232864157	1.70751794613726	1.64379362533351	15.3692568906322	4.1689205801138	1.78413446233532	1.67600335731114	0.999557531570599	Distal Intergenic	KRT6A
cluster_1	chr12_52948686_52950146	27.911049524136	13.3688043655214	2.81097863267608	3.22077159304722	26.2914414678911	14.5399084006105	9.79260900405498	13.2083899879681	0.996678374444923	Promoter (<=1kb)	KRT8
cluster_1	chr12_52964630_52965848	15.8527965851172	4.23005898783079	2.03721211433871	2.02632949043954	13.0527028724643	5.82709940597224	3.26927401105025	3.27447777845818	0.999816596232766	Distal Intergenic	KRT18
cluster_1	chr12_53049796_53050175	25.5312458461373	10.9048430306785	5.85056839284917	5.11035127661336	27.1672370038469	11.5808882810068	6.50953935942545	11.8693631056689	0.999727524146569	Promoter (<=1kb)	TNS2
cluster_1	chr12_53174988_53175572	18.2037087777524	6.34337004367957	2.23674463754848	3.335275142051	27.0184083682247	5.3250738010153	2.99352589679919	3.29188270027749	0.999666045524219	Promoter (1-2kb)	CSAD
cluster_1	chr12_53189985_53190571	14.4806877080676	6.96469492137129	3.89340414673469	4.65664117823912	14.2518543128349	6.12345398829906	4.12949785855863	10.9015148138221	0.989788922942379	Promoter (1-2kb)	ITGB7
cluster_1	chr12_53197412_53198219	11.1706045805336	4.96220633092934	2.52993269508077	2.96035656403598	13.2427698091238	4.16845213940922	2.22927447423444	1.95790637084432	0.999938258197815	Promoter (<=1kb)	ITGB7
cluster_1	chr12_53216962_53217757	29.2912447397851	6.36925646253834	2.5077357077102	4.60937049599456	32.9043839725338	7.24007590307722	3.43471939648355	11.459570013859	0.999643948938174	Promoter (1-2kb)	RARG
cluster_1	chr12_53224501_53224866	22.3936556238957	7.15776548964774	3.7239481114333	2.96241369032948	24.6863684691804	7.65746174620273	2.09354418256	12.3012230196775	0.998044822020232	Intron (ENST00000394426.5/5916, intron 2 of 8)	RARG
cluster_1	chr12_53234250_53234613	21.6615216067778	12.0194538687669	5.6187570764633	7.16550176566319	22.6255778766137	11.2201642984075	7.02097737330003	8.47055842201114	0.999880054155683	Promoter (1-2kb)	RARG
cluster_1	chr12_53938314_53939437	14.8436182197368	3.37629949921247	3.1370247946882	5.44351228109279	17.3444957525602	3.51236936139149	3.75035431718202	2.65322830676637	0.999597114919357	Promoter (<=1kb)	HOXC13
cluster_1	chr12_53965730_53966738	9.63922008861738	1.26368166359732	1.51226624101001	1.01608320552356	11.8505004008219	1.62759575852999	1.47976461269397	2.0101086663435	0.999849173501715	Promoter (<=1kb)	HOTAIR
cluster_1	chr12_53995066_53996301	9.05005687939857	1.47817847425695	2.1770880983066	2.15648285409851	9.09120276114768	2.12358129675878	1.51005700875602	2.43332189332134	0.999755565369789	Promoter (<=1kb)	HOXC9
cluster_1	chr12_54159063_54159646	19.4977623773401	8.75461788633812	12.2155249123203	6.2854705208689	20.6172851845569	11.5672366486186	8.59912294809868	3.32032693035762	0.993005211599731	Intron (ENST00000634429.1/23583, intron 4 of 5)	LOC102724030
cluster_1	chr12_54214609_54215171	33.4444521491717	12.4379067297474	16.3361526346251	9.97926940765645	27.10305975886	12.996060458032	11.3669539543008	10.3141727881252	0.998098149277915	Distal Intergenic	MIR3198-2
cluster_1	chr12_54217690_54218322	16.8895430305458	8.13346738053019	5.54893871491225	11.0245551615968	19.6564275738384	7.17008255568854	5.63363433927757	2.71404341049948	0.994776015695968	Distal Intergenic	MIR3198-2
cluster_1	chr12_5429614_5430463	13.039502215797	8.36110443708405	1.83669669622385	1.90764732720482	13.83848919054	8.18826954602516	6.07380877517643	3.12197230193976	0.994353093014479	Promoter (1-2kb)	NTF3
cluster_1	chr12_54300684_54301766	22.254124217274	13.9331877506079	2.89026095832002	3.6719289703281	22.0035385068665	11.4754951698432	8.14207747320132	13.6490901139499	0.990851014614271	Promoter (<=1kb)	COPZ1
cluster_1	chr12_54526910_54527935	9.025005484736	2.91076312318654	1.62353293656451	2.37582215019641	9.74291568806667	2.55015227221118	1.97025912232877	0.739295110673546	0.999945478259978	Intron (ENST00000293373.11/3071, intron 21 of 30)	NCKAP1L
cluster_1	chr12_54683135_54684118	15.8058877941162	5.09850064452155	2.66021857496506	1.75923062528241	25.0248931166039	2.38242933211267	3.57604741340644	1.05661598721487	0.999144859376548	Intron (ENST00000552524.1/ENST00000552524.1, intron 1 of 2)	DCD
cluster_1	chr12_5479822_5481269	11.4045662960394	13.9725033794615	6.19116380208322	4.68610645435567	10.0205855745287	9.7694567367657	7.7391165577493	3.04177213467613	0.570059651074674	Intron (ENST00000423158.4/4908, intron 1 of 1)	NTF3
cluster_1	chr12_55484049_55484836	8.41665196211265	5.82861491709409	5.04013110645139	2.07075365648705	10.4677269954485	2.95592211544506	1.24261253180052	1.61451598461726	0.991668894063348	Intron (ENST00000556750.5/ENST00000556750.5, intron 2 of 3)	OR6C68
cluster_1	chr12_55646106_55646799	16.8303370692669	3.68560971476822	2.53544348784373	2.8464738263398	15.2357705777979	2.20188138152245	2.46993147894237	3.43231493357369	0.999863432912249	Exon (ENST00000609031.1/ENST00000609031.1, exon 1 of 1)	OR10P1
cluster_1	chr12_55681058_55682095	15.9813379172851	2.16762361661581	2.40374134843615	2.45938528278333	15.305506336283	4.3927660317542	2.27511680548867	5.13804278108057	0.999696977306595	Promoter (<=1kb)	METTL7B
cluster_1	chr12_55736986_55737597	29.4171052458939	8.56427866641135	12.4806783670207	7.64369480890099	24.3817702922583	9.00868774664049	8.15433126069114	7.11087470124975	0.998731116614547	Distal Intergenic	GDF11
cluster_1	chr12_56078921_56081012	32.6835640537728	13.8200954804719	6.62344584432058	5.97721215010202	32.4502993138324	14.8440495305965	10.3894853516094	16.852223872767	0.999107995255483	Promoter (<=1kb)	ERBB3
cluster_1	chr12_57016192_57016867	16.3267434600226	4.58462145992351	4.74868092447049	3.71042263542453	9.73623390139784	2.6697977616308	2.1241904863386	1.33949979817733	0.991979551292995	Promoter (<=1kb)	TAC3
cluster_1	chr12_57224784_57225214	24.6782350302325	8.66366172800812	3.71644597926204	2.3332234371742	27.7206455986015	4.951881485096	3.49004161856778	2.43790326075078	0.9999809045027	3' UTR	SHMT2
cluster_1	chr12_57454864_57455470	31.4563374424833	6.42877371672372	6.50463017666029	3.45017729168463	35.8524077980858	10.5784529018759	6.93988769961541	12.9349238548559	0.999582257781355	Promoter (<=1kb)	INHBE
cluster_1	chr12_57456138_57456443	31.0656108421142	6.81743301907309	3.85051123339073	4.22064743932667	33.8021353416849	8.73909216107047	7.71672538220904	6.74530565197327	0.999983077928819	Promoter (<=1kb)	INHBE
cluster_1	chr12_57475087_57476719	12.0806312776104	4.21173037625069	4.89144045636295	5.20317640393347	14.4730646108613	6.98407171636124	5.20366253358705	5.46063300540232	0.999453373900082	Promoter (<=1kb)	ARHGAP9
cluster_1	chr12_57609080_57610016	12.6311485332131	2.93039311274326	3.09627223050287	3.69824404194574	17.0254413839226	3.29262154349972	2.25855485664152	2.87972372594157	0.999574973161612	Promoter (<=1kb)	ARHGEF25
cluster_1	chr12_57619392_57620400	9.97994440171992	3.75885205983556	2.65730749195374	2.5854636990202	11.3206490161843	4.97696055210109	4.36784613839882	2.04061373570284	0.999781059465744	Promoter (<=1kb)	SLC26A10P
cluster_1	chr12_57764712_57765792	15.131113342431	2.93524691692459	5.70311135367873	5.94200925202986	16.1079064060802	5.35345221954283	3.24476336765715	4.45894378783415	0.998889693600282	Promoter (<=1kb)	CYP27B1
cluster_1	chr12_57766362_57767431	13.7215800768424	4.44794634187227	4.97865965614398	4.49300848320887	18.9772806000939	7.19327261801419	6.10129737883734	6.80920658491404	0.998623957230027	Promoter (<=1kb)	CYP27B1
cluster_1	chr12_57814866_57815598	17.0475047891564	2.11873377003697	2.39834905875884	2.01074520306339	13.8634213692326	3.47356273413559	2.5306587619986	3.05299041191864	0.999723849820858	Promoter (<=1kb)	AVIL
cluster_1	chr12_57836830_57837480	18.8881065709822	4.45810736400246	5.26746788869833	7.8681399537517	21.897034466361	6.60439608102163	8.91433868533001	15.4496702265709	0.977936588245158	Promoter (<=1kb)	LOC105369783
cluster_1	chr12_5964796_5965593	10.5719697330334	3.47807652134135	0.981041588624758	2.61562535444403	10.8425566916942	4.13330459412168	2.61876954263946	2.46135674642038	0.999964739146493	Promoter (2-3kb)	VWF
cluster_1	chr12_6038020_6038751	11.0329404760188	4.41148548874187	2.78367181350013	2.236655298642	13.5068294770306	4.27679363207854	3.21738122718213	4.36755848520901	0.999901873107134	Intron (ENST00000261405.10/7450, intron 18 of 51)	VWF
cluster_1	chr12_6056361_6057136	16.6892083582976	2.27707914159703	1.63137221866871	1.33796168194668	15.7023974484366	4.93515565388164	2.82115862538345	0.875954523176219	0.999945326939251	Exon (ENST00000261405.10/7450, exon 15 of 52)	VWF
cluster_1	chr12_6057572_6058202	18.0755959030358	6.9075674276482	3.40912885320057	4.57578939125678	22.7236469344109	4.31588158716512	3.78559391151605	2.15040885775548	0.999864790288204	Exon (ENST00000261405.10/7450, exon 14 of 52)	VWF
cluster_1	chr12_6205097_6205713	20.0693727580334	6.27623167970589	1.97019358071109	4.25308956670138	20.6774699263026	4.59090958022662	3.67518421016775	3.93529457764241	0.999986114109584	Intron (ENST00000382518.6/928, intron 2 of 8)	CD9
cluster_1	chr12_6214717_6215776	25.9179135563369	3.72573173570196	1.94834347481168	1.35252793334444	27.2551429859888	3.75518590606876	2.76755987323816	4.1040976741624	0.999981481260005	Intron (ENST00000382518.6/928, intron 2 of 8)	CD9
cluster_1	chr12_62435178_62436317	17.3623622356907	5.53403017287985	9.24741312505541	2.74108458911222	18.111332125846	6.50980079372649	5.15796113869883	4.51457465607379	0.998365007873483	Distal Intergenic	MON2
cluster_1	chr12_62653107_62654386	24.8958380817588	11.8141051435985	6.30122812339039	3.07362439702601	24.6522435287247	7.19172946203417	5.35095108453129	2.5904223645948	0.999754257040106	Intron (ENST00000228705.7/57460, intron 9 of 9)	LINC01465
cluster_1	chr12_62659309_62659988	26.7735785193237	18.3252709486496	8.69263829513289	4.19692479003546	32.9174467506447	4.84805243270908	2.21247409933688	3.56198810221407	0.996467203203617	Intron (ENST00000228705.7/57460, intron 9 of 9)	LINC01465
cluster_1	chr12_6268629_6269448	8.25198607504391	3.10392753302469	1.14357504647769	1.24693443452242	10.9601735321187	2.31141372184073	0.536649467754229	9.12078248620204	0.950027184060869	Distal Intergenic	CD9
cluster_1	chr12_62913826_62914904	14.5919348399496	1.2870605372048	1.63821717047553	1.48044472090887	15.3104257961861	0.982503621882155	0.600587741254196	1.36879341785157	0.999896572257444	Intron (ENST00000228705.7/57460, intron 1 of 9)	PPM1H
cluster_1	chr12_630483_631309	11.5286082888158	2.80750891674401	1.49165455900311	1.37353619443218	16.9459499495535	2.52445130420535	1.22648189993366	2.24078450947609	0.999686418409562	Promoter (<=1kb)	NINJ2-AS1
cluster_1	chr12_6310114_6311302	25.5060148458471	10.1541669823737	4.03581987286506	5.40919420300581	27.2754747457088	9.7576328402136	7.54059162954702	6.677447867671	0.999991720092324	Promoter (<=1kb)	PLEKHG6
cluster_1	chr12_6312389_6313323	14.2895630158942	8.88993451253965	2.59190511187579	3.94438022642944	16.9194981978114	6.78197242383332	6.44228850790382	5.36622296219213	0.999230431525185	Promoter (<=1kb)	PLEKHG6
cluster_1	chr12_6322929_6324081	19.6361106553306	11.5537913280493	5.94426563898424	5.03190568851242	20.5820383822133	6.74521043159335	6.80926204429527	6.07774966244375	0.999763396351903	Intron (ENST00000011684.11/55200, intron 13 of 15)	PLEKHG6
cluster_1	chr12_6326385_6326671	26.4330916550736	9.71614659467979	8.58751780048454	5.96205331586189	24.8578662715867	12.1667677591587	5.4196936996784	9.44391938066285	0.999810641604499	Exon (ENST00000011684.11/55200, exon 14 of 16)	TNFRSF1A
cluster_1	chr12_6363222_6364229	18.2771376911224	10.4744742358128	2.09967727309478	2.2830332000456	16.584607163007	7.70825266825148	3.80946249726532	5.06406479633363	0.998486585155309	Promoter (<=1kb)	SCNN1A
cluster_1	chr12_6371036_6371519	28.2105647503903	10.9523672079182	2.83830502976689	2.63623447780415	35.7380076617277	12.3434274911623	6.27534614563837	17.9659347031529	0.996190482100034	Intron (ENST00000360168.7/6337, intron 1 of 11)	SCNN1A
cluster_1	chr12_6375325_6377015	26.8503304450682	10.6572717364567	2.58501990590007	2.786674943668	28.7193170823395	11.3499789369509	5.97006630879224	7.52024113796738	0.999902097444773	Promoter (<=1kb)	LTBR
cluster_1	chr12_6383586_6384457	12.465227386056	4.09922921767065	2.14234346278841	1.19436924272489	16.1998564721271	6.01846553693212	2.62760310965206	11.4397994406084	0.977295539100565	Promoter (<=1kb)	LTBR
cluster_1	chr12_64273680_64274510	9.51922262178162	2.61777431378384	3.59866474816761	4.34595238046211	11.6318849536349	1.76245522633429	2.3273157707267	3.71935174601274	0.997126998054917	Intron (ENST00000535684.6/ENST00000535684.6, intron 2 of 4)	C12orf56
cluster_1	chr12_64992375_64993151	12.9062499258197	2.10965804402591	2.97320676770041	1.98701882208385	10.9710779759981	2.46790098592135	1.06769929262005	3.06136896704818	0.999506851560584	Distal Intergenic	LOC107984522
cluster_1	chr12_65120871_65121868	17.0311598150956	6.86869474791464	11.6028518139616	7.12555848668456	23.456799681275	6.56785991004621	6.68639475243448	5.96821994285792	0.994465287823695	Promoter (<=1kb)	WIF1
cluster_1	chr12_6538704_6539504	23.5737510618244	5.81124198589455	2.71474866822479	4.66669192440011	18.5795186852015	6.70422363044105	4.49709277631195	8.18545998168951	0.999187157241824	Promoter (2-3kb)	GAPDH
cluster_1	chr12_6540376_6540993	29.1337662663184	6.6267343294746	5.95403547036885	6.03213311723867	21.7482562183609	10.5015425087843	3.73311908672361	22.8545197489176	0.953431444658781	3' UTR	GAPDH
cluster_1	chr12_65897417_65897949	19.3503498280599	6.30612405031324	4.36584311339568	4.47927546450368	23.7528465742216	5.52519540829556	5.22692142533193	2.8028181294297	0.999933471538858	Intron (ENST00000536545.5/8091, intron 3 of 3)	HMGA2-AS1
cluster_1	chr12_6620022_6620895	24.7180203841005	2.44355188314046	1.55936831686925	1.57793553975543	27.3120490865658	2.37039093598913	2.46205027262785	2.01112512929532	0.999966228686494	3' UTR	LPAR5
cluster_1	chr12_66497136_66498289	16.3499046546869	1.15849875340691	1.46987187494768	1.84885755468083	9.80145856850233	0.611107631136521	0.608154046780755	1.19842750978253	0.996847946668049	Intron (ENST00000398016.7/23426, intron 7 of 23)	GRIP1
cluster_1	chr12_6703566_6704110	13.9388320489941	9.96874876556847	9.1332607863829	4.11101251603142	15.0382074142333	8.83204219676595	5.13012286990598	2.96985660759354	0.985189383975332	Promoter (2-3kb)	PIANP
cluster_1	chr12_67519745_67520336	21.1718772024125	8.84182469262798	4.05096714585738	5.29913978710734	24.0788941314251	3.13717572755576	2.32622875873084	2.25283124550059	0.999690584368192	Promoter (<=1kb)	LINC02408
cluster_1	chr12_68358435_68359241	11.0788548757353	6.94270360418974	3.85313210963452	5.32230879652626	9.94710705425612	6.10926009201083	4.15064765441107	5.00889559303905	0.998966673493856	Intron (ENST00000693550.2/100507195, intron 1 of 1)	MDM1
cluster_1	chr12_68538679_68539546	8.99116005398358	1.41560302034122	1.55230263993642	3.92957319460781	14.1125327104452	2.26607507430599	2.15535497234622	1.83949398685688	0.997218106213299	Distal Intergenic	RAP1B
cluster_1	chr12_6885959_6886569	7.30381891634679	6.10772598031078	2.49531282973727	1.82693675922456	14.9241196129144	8.66417301097431	5.3847880913029	1.98884450557697	0.954712843809261	Promoter (1-2kb)	DSTNP2
cluster_1	chr12_6945981_6946855	53.5262033163198	19.2404344437819	6.61679778879031	7.86811815609427	42.3374851771194	18.5715800725289	11.4450071478748	12.5161052874783	0.999655831117524	Promoter (<=1kb)	PTPN6
cluster_1	chr12_69896486_69897209	17.0021462836404	2.71124136638968	2.8045308147745	1.6809536593506	28.0147376551084	2.58183248425319	2.3950628680856	2.56318070212689	0.998922397533259	Exon (ENST00000552032.7/196446, exon 10 of 25)	MYRFL
cluster_1	chr12_69933020_69933696	22.924433109293	18.1903963021973	9.53462083310808	5.75626885112936	18.0161684095171	4.74321069085633	4.26478339552768	1.67079877526306	0.959254077083834	Promoter (<=1kb)	MYRFL
cluster_1	chr12_70807877_70808585	14.6446949023454	2.42732797278428	1.62923053866474	1.2921738788877	20.8342822427965	1.58376032591883	0.986533545658163	0.553727211691114	0.999750682497615	Intron (ENST00000283228.7/5801, intron 2 of 13)	PTPRR
cluster_1	chr12_71214472_71215344	10.2802609079954	4.5145952737486	3.06373941106546	1.448421237655	7.78995897651048	2.91378582882022	3.54318578990778	1.42273258137993	0.997543970621548	Intron (ENST00000393330.6/7103, intron 4 of 11)	TSPAN8
cluster_1	chr12_72612043_72612657	24.2611490253929	1.95957312601356	1.30615480798216	1.78846711779403	19.830061640431	1.77535978628592	2.36437954165458	1.57396374365935	0.999779414733337	Intron (ENST00000261180.10/29953, intron 12 of 18)	TRHDE
cluster_1	chr12_75944041_75945036	17.6328671401817	1.90759732357539	5.12223789524461	10.4365311032173	15.0560200838974	0.860305501584841	0.947257177818181	2.52050395721808	0.975873888468102	Intron (ENST00000552856.1/105369844, intron 1 of 4)	LOC105369844
cluster_1	chr12_76158596_76159215	11.243770226886	3.37404455894849	5.58316334851722	4.37918142952707	9.95812807553915	2.71050734024082	3.70419519635758	5.05004686548079	0.994123980744319	Distal Intergenic	NAP1L1
cluster_1	chr12_76312287_76313587	6.37860119718463	1.86151833608337	2.44225682930646	2.76402798552299	6.98036365381154	2.56547614944578	1.24290200830102	1.53921069674832	0.999174920271974	Distal Intergenic	BBS10
cluster_1	chr12_76319611_76320425	15.5355070270082	10.2884578132544	5.22718225927251	3.56949178017585	12.6555191113177	5.32216818384491	2.27484042394215	3.24077699753008	0.992496965590975	Distal Intergenic	BBS10
cluster_1	chr12_7637695_7639083	16.0859119243278	5.81115141544619	7.79497535119809	7.8535361404167	14.800326972963	5.83206028528536	7.60648404610128	5.1113732712109	0.997219843691934	Exon (ENST00000642279.1/ENST00000642279.1, exon 2 of 2)	APOBEC1
cluster_1	chr12_76872312_76872953	24.7062772775993	2.83400894761125	3.4484828764362	3.63041237691042	28.027344971941	3.49331858584773	1.48073102945857	1.39200412109355	0.999911784132602	Intron (ENST00000311083.10/1466, intron 1 of 5)	CSRP2
cluster_1	chr12_7758043_7758999	9.19210716513885	1.43715255730064	1.76113791904559	4.8276348995324	9.86658900394694	2.68396888123999	3.21922147014984	1.12481981225537	0.995671609530226	Distal Intergenic	NANOGNB
cluster_1	chr12_7787452_7788270	13.8969925482464	4.16549461078985	1.53207140957926	1.22597984176295	14.8925160203231	2.54514493737573	3.2795561500047	1.70375872974082	0.999981915992006	Promoter (<=1kb)	NANOG
cluster_1	chr12_78229512_78230554	9.59917304906906	2.28721427801655	6.41101655520035	6.24508265455563	7.62421055788086	1.76458547918743	2.31422313288033	2.24676523710615	0.910725584187499	Distal Intergenic	NAV3
cluster_1	chr12_7832033_7832712	8.94500599136383	4.82859613570068	4.34994620810447	2.07259870004746	13.1583253686997	3.65753533986115	3.45817195738326	1.46202353743899	0.997708046767122	Promoter (<=1kb)	SLC2A14
cluster_1	chr12_79546924_79548193	29.8075797787661	9.2502877438453	3.428359160295	3.47970168443596	26.9886464546653	6.74593101711418	8.4158442293926	11.1833751420596	0.999474507874539	Intron (ENST00000551032.5/ENST00000551032.5, intron 2 of 2)	PAWR
cluster_1	chr12_7959622_7960244	15.8006749648503	7.20327322211128	1.74290470650528	1.0973200568745	17.3249403537063	4.01555682319448	2.09719010016828	1.34993915105528	0.999896144298058	Intron (ENST00000661633.1/ENST00000661633.1, intron 1 of 1)	SLC2A3
cluster_1	chr12_79784293_79785023	15.7410978183083	2.58192336826731	3.79561319544401	2.73462315255804	12.4796510845166	1.7285648080934	1.07209442505841	1.20759608427061	0.998963886710977	Promoter (1-2kb)	PPP1R12A
cluster_1	chr12_8018621_8019568	26.7605840169887	9.67249474017678	9.63515765316422	6.86992766671361	31.7865772445561	8.02338102610997	5.9080750611602	3.90819954908874	0.999783224649827	Exon (ENST00000631571.1/ENST00000631571.1, exon 1 of 2)	FOXJ2
cluster_1	chr12_80683862_80684651	24.3433866362985	7.16209452639792	2.43253554367886	2.29014496103778	29.5844927674452	1.20065858263099	0.891357362164829	2.08527058817289	0.999870589679039	Distal Intergenic	MYF6
cluster_1	chr12_80707906_80708984	17.9133498440192	5.77489023254086	5.67187381893334	4.22717675661305	14.13583957402	5.45901911963885	3.53125901226649	0.762775230738073	0.998396780029441	Promoter (<=1kb)	MYF6
cluster_1	chr12_82314278_82315050	20.9846206911546	10.1303906228283	4.22234622926732	2.70852284786179	16.2500925579255	7.06805954816521	5.2541441163391	4.86996796418459	0.998803709711072	Intron (ENST00000552377.5/29080, intron 2 of 3)	CCDC59
cluster_1	chr12_85273385_85274040	13.8486865799728	4.04922737303166	3.46534798423188	3.59853873679499	12.0954409304386	3.97274752631347	2.79166824504102	1.34870481808202	0.999750757862373	Distal Intergenic	ALX1
cluster_1	chr12_85948727_85949791	14.4579708758584	1.70958207368944	1.15143066630129	2.98188336765619	13.3044695038585	0.669312123747155	1.23612753849863	1.19419556380995	0.999632611131554	Distal Intergenic	NTS
cluster_1	chr12_8796880_8797709	14.3453690474645	2.45016407130977	1.08926915866347	2.04740220977568	13.0286797272145	1.32344420787172	0.907625923497883	0.379947702903039	0.999906191906541	Intron (ENST00000537288.1/ENST00000537288.1, intron 1 of 1)	RIMKLB
cluster_1	chr12_8810027_8810764	24.8203839006288	1.59381210123964	1.09983287416764	1.76667288931464	19.9443623807832	2.76470958650403	1.32190611495125	1.57473087818088	0.999799917177542	Intron (ENST00000537288.1/ENST00000537288.1, intron 1 of 1)	A2ML1
cluster_1	chr12_8818993_8819973	26.0656073161907	2.39015167582751	1.48959634296643	0.436875880450982	26.9235765298978	1.4108306266679	0.670840844562432	1.77712416353874	0.999969147517209	Promoter (2-3kb)	A2ML1
cluster_1	chr12_8860059_8860940	11.3304399811491	1.39026663797921	1.65405660398388	1.85324328749532	10.0438583656364	2.44292028233599	2.88909477604024	3.40106134941897	0.999386814096419	Promoter (2-3kb)	A2ML1
cluster_1	chr12_8906244_8907343	11.6460014505003	2.84862132084797	2.01765702290538	1.63402780912019	9.90822401478378	2.49386746107482	3.31828135107072	4.8984622028498	0.99857473026374	Intron (ENST00000631830.1/ENST00000631830.1, intron 1 of 1)	PHC1
cluster_1	chr12_8911626_8912262	24.1527796247766	2.20781257399666	0.751485824777157	2.52324663841031	26.116021765383	1.82402275730089	1.56604046457123	1.15011201825172	0.999955125644653	Promoter (1-2kb)	PHC1
cluster_1	chr12_93080335_93081719	10.1003394045388	8.23369182351756	2.08736777693614	2.3985623435941	9.35344026443375	3.63423644173051	2.35200189165349	1.4768672793216	0.987111471768615	Intron (ENST00000550324.6/643339, intron 1 of 2)	LOC105369908
cluster_1	chr12_9364169_9365358	14.0928782718242	1.86252985505251	6.32149488337619	6.47830823486939	13.48304176977	2.71308455362688	2.45882448643114	22.0244332235438	0.621731125634293	Promoter (1-2kb)	LINC02367
cluster_1	chr12_93741704_93742904	24.6019769313974	16.9662733867189	15.8052583163885	10.0398906979573	29.5643780964183	11.9463878061295	14.1725570721376	9.21715731831792	0.996598090690478	Intron (ENST00000549615.5/8738, intron 2 of 3)	CRADD-AS1
cluster_1	chr12_94304154_94305479	13.7516290916798	2.05974232785128	0.815191073698523	1.75141809321179	16.8342636900571	2.37909416592693	1.7030888671708	1.92410177835475	0.999948332370208	3' UTR	CEP83
cluster_1	chr12_94389500_94390429	18.9938278077714	3.45933585793689	1.32736183773008	1.45388534375566	17.9348176124662	4.09429931575823	0.896858116050925	4.07924277425295	0.999949907851976	Intron (ENST00000397809.10/51134, intron 6 of 16)	CEP83
cluster_1	chr12_94815834_94816458	20.2798986562685	8.89816718465965	2.69849968489032	2.38772748578399	21.8610472517915	5.4707579408827	3.42485502728622	1.03624142556877	0.999907097286243	Distal Intergenic	KRT19P2
cluster_1	chr12_95204236_95204803	12.7590332000859	6.13215414771714	2.11449433390448	3.14669796693724	14.2145007189418	7.1798621133948	2.26825910502641	10.0257264088186	0.985247187492082	Intron (ENST00000343958.9/55785, intron 2 of 20)	FGD6
cluster_1	chr12_95446376_95447115	13.6506280795492	8.41008710618025	6.83286062963833	5.3502356414028	16.432224851315	7.31067822876847	6.37683882545635	4.60410949805851	0.999602877200067	Distal Intergenic	LOC107984545
cluster_1	chr12_95551287_95551732	29.8906678585362	14.0684481667827	8.97477822945463	3.83274866061898	27.6861791887768	6.94418455360145	6.59400991646173	3.92285174610371	0.999438920653512	Promoter (<=1kb)	PGAM1P5
cluster_1	chr12_95623483_95624172	15.4728729882124	6.10501899673375	2.7466098884884	1.77462210125965	12.8857777095528	6.04298943629552	2.12766249074451	2.46962845398413	0.999598109817972	Intron (ENST00000626376.2/100132594, intron 1 of 1)	PGAM1P5
cluster_1	chr12_9813768_9814789	16.1199375540902	3.99276259326852	4.23718906502869	2.71386961860663	14.3238994420247	3.17772190178985	2.10745250641654	3.04720755469132	0.999808760396768	Distal Intergenic	KLRF1
cluster_1	chr12_98696085_98697015	7.52157368761611	2.22335117819981	1.66701505973793	3.08378270771639	10.8236429768333	2.64520650334881	2.75531036973082	1.77628542871375	0.998865263737343	Promoter (2-3kb)	APAF1
cluster_1	chr13_100490712_100491616	15.3857670687194	5.28448257857114	2.25692818868978	3.56204915955047	12.0118977763513	2.5029066696357	1.81937935165276	3.56491207975687	0.999168444976441	Exon (ENST00000621936.1/ENST00000621936.1, exon 1 of 1)	LOC107984574
cluster_1	chr13_100694932_100695462	14.0731800253526	3.82704774216469	4.5798921636499	2.77961193697939	18.7180684544078	4.28083532654109	4.31722478112418	1.18297237614717	0.999467179777846	Distal Intergenic	NALCN-AS1
cluster_1	chr13_101453605_101454345	16.5000534386316	3.32560850507519	2.78146458928265	2.12210075554883	16.0492209034126	2.84013479355289	2.20957485647402	2.5157490665499	0.99997218141466	Promoter (<=1kb)	ITGBL1
cluster_1	chr13_103068097_103069007	13.1609107880382	1.46463176956761	2.93059017339086	2.19289771598491	11.6100612390412	1.15933972270051	1.76853160384344	1.14464334721913	0.999376538172658	Promoter (1-2kb)	SLC10A2
cluster_1	chr13_104181288_104182285	12.8929194745529	3.90040331973033	0.846609615385043	0.920227261820861	27.7012827632225	1.3176975302055	0.383030875921072	1.4955860028652	0.996241555977527	Distal Intergenic	LOC105370340
cluster_1	chr13_106570296_106570910	50.7369031284832	7.73530473360175	7.55011887655896	12.4047576867355	44.5937711938211	10.4939226734129	8.07988570608658	11.337406448135	0.999671098954126	Promoter (1-2kb)	NA
cluster_1	chr13_106796157_106797371	31.7393975994994	11.6401411283006	8.09513122285415	7.14544824564516	38.6194843108009	6.16022249739704	3.48656580817967	2.14826293826936	0.999720844428235	Distal Intergenic	LOC107984627
cluster_1	chr13_110266876_110267528	20.1469624627618	8.60325816318487	4.30550470926602	3.44931303435173	19.3860887065056	11.7981185276535	14.5550486056783	4.05677139410827	0.982237348619675	Intron (ENST00000375820.10/1282, intron 1 of 51)	COL4A1
cluster_1	chr13_110326609_110327832	9.51926724033751	5.3834443286512	2.00328227169013	1.38881165631543	7.36452994801687	5.29948806012925	1.56876500700678	1.56824351840532	0.991926183566136	Intron (ENST00000400163.7/1284, intron 3 of 4)	MIR8073
cluster_1	chr13_110455732_110456403	20.5577350489949	8.34277664589379	8.06245113853276	10.163867082609	26.2737532044743	10.4221886816258	7.42808871719382	7.4027882790188	0.999453803753632	Exon (ENST00000458403.2/100129836, exon 5 of 5)	COL4A2
cluster_1	chr13_110485396_110487053	10.3780450859334	5.39025197688516	2.27945806340203	2.58173309792258	12.6221823249212	5.25589450397213	2.98795225097922	2.27791896520982	0.999801295550545	Exon (ENST00000360467.7/1284, exon 34 of 48)	COL4A2
cluster_1	chr13_110644741_110645546	22.0460135792107	7.979038377364	8.98625725693119	6.4264985566147	23.2391387850169	9.48291716329053	8.48825873109004	4.20906131481028	0.999737849375404	Promoter (<=1kb)	CARS2
cluster_1	chr13_110887092_110888274	9.46581005566633	4.54612619448551	2.16009713777061	1.68503153935065	9.50513869323381	3.38746984883328	3.80011401918902	2.98918870016367	0.999850583333087	Intron (ENST00000267339.6/55608, intron 4 of 5)	ANKRD10
cluster_1	chr13_110908008_110909096	15.284556368437	2.95022962312602	0.768494345633884	2.62485308558216	15.3546738016385	1.39302865080247	1.74469101767382	6.91275836706485	0.998013182296004	Promoter (1-2kb)	ANKRD10
cluster_1	chr13_111344459_111345366	16.3410925193551	8.10116922185802	4.02266728349307	5.37336346303603	23.4436289332853	7.52016336715797	6.7710315844242	8.56931884250289	0.998792105769247	Downstream (<=300bp)	TEX29
cluster_1	chr13_111632784_111633413	18.0175187457366	4.47510730287073	1.32526031446168	2.4729925940652	18.1428195045966	3.880872568598	2.43399217399536	3.86161828562	0.999988234027414	Intron (ENST00000375713.1/102724489, intron 2 of 3)	LINC02337
cluster_1	chr13_111845554_111847089	19.3310835657148	4.32623543373137	3.61533839265397	4.18735397183234	12.6239843808413	3.39417918353177	1.70946911367656	0.882574318480716	0.997256820883767	Distal Intergenic	LINC00354
cluster_1	chr13_113089744_113090740	15.180981610071	4.08351068444576	1.41240102410068	1.96063483561055	13.3017404038329	4.62782480671714	1.88667761437102	1.02125473287675	0.999941056188498	Promoter (<=1kb)	MCF2L
cluster_1	chr13_113109413_113110259	11.2690019235307	2.19643576082136	0.763332673243114	2.66293274427968	13.2203525669721	3.87752731104012	3.70821464653999	1.42701097792858	0.99974677308013	Promoter (<=1kb)	F7
cluster_1	chr13_113376731_113377414	21.0820336722908	1.06003135688327	0.608822668801277	1.31010604579548	24.537943370506	1.65176965599367	1.04566943153692	0.709648365758394	0.999946548526573	Distal Intergenic	GRTP1
cluster_1	chr13_113860044_113861291	24.9085087760657	7.41490462102519	1.33979053509197	2.565210447916	27.4863164455663	7.76481209878263	4.61126599686293	2.67912737247222	0.999993147617094	Promoter (2-3kb)	GAS6
cluster_1	chr13_113951048_113952017	12.8225466487678	6.71792056754436	3.86759982121768	3.58656984033671	14.5293450314104	8.65808562973406	5.1668109130411	5.9498634394676	0.99919521649184	Distal Intergenic	C13orf46
cluster_1	chr13_21326020_21327317	25.0920522107989	10.8745127126804	7.90022902941257	7.15330611266035	23.8306008883742	9.9430503611318	6.55150767951104	8.11674372481607	0.999980614945385	Promoter (<=1kb)	MIPEPP3
cluster_1	chr13_23599362_23600004	22.8581663734119	2.21002648850636	1.24937812033435	1.34278772831806	21.5826797048877	1.50717907346613	1.35266922424486	0.92523700917497	0.999955006354741	Intron (ENST00000403372.6/55504, intron 1 of 7)	TNFRSF19
cluster_1	chr13_24715914_24716771	11.8359982562756	3.55162906597335	1.11994430313047	0.604832262202639	19.0813554411117	2.44565677830628	1.89058304090093	1.9820467646371	0.999364390030647	Distal Intergenic	LOC105370118
cluster_1	chr13_26475181_26476808	14.5265011760885	4.96531774178428	3.10367711577677	1.8306522400372	16.1307602160562	7.69802579473196	3.59576693162226	3.11246001572785	0.999823621516294	Distal Intergenic	CDK8
cluster_1	chr13_26785095_26786326	10.7696201325336	4.82523284932559	2.85237314198311	3.10143118157258	9.53457562882924	3.29141647829346	3.03780168578009	2.51860427293207	0.999859449449895	Distal Intergenic	GPR12
cluster_1	chr13_27034541_27035482	11.5028748132552	3.82179137809007	3.95914460247041	2.63520425303969	10.7816562280946	6.63850779219812	3.63714032951124	2.01384892072338	0.998885155464392	Distal Intergenic	USP12
cluster_1	chr13_27796908_27797552	12.6759886338494	4.59625974156894	4.27637689389297	2.97615669693891	16.6411809205902	4.42377177743649	2.91449140288415	3.24983816557364	0.99980673088385	Distal Intergenic	GSX1
cluster_1	chr13_27953506_27954901	11.8598775020672	9.02061299008001	7.76455782871315	4.29282561673525	12.5088420382289	8.34476313290658	8.0152095500763	4.6928483685029	0.984809974943875	Promoter (<=1kb)	LINC00543
cluster_1	chr13_27960270_27961291	15.0125184042066	8.18799783375916	3.6614000822082	3.21153616819966	17.0792534491363	7.29491516269049	6.27684886572882	6.12118308363732	0.999731585872909	3' UTR	CDX2
cluster_1	chr13_27965829_27966908	17.8069797287445	4.76592359993145	3.34323131565748	2.36814142863949	22.2615821008816	7.77201741454927	7.78195479746187	3.19456002359071	0.999480748028394	Promoter (<=1kb)	CDX2
cluster_1	chr13_27971187_27971686	21.8405645190193	7.72600050216763	2.65466244993071	2.66638457506678	18.9812447892085	4.32094494367412	2.95843736274989	2.14980788406213	0.999898441250653	Promoter (1-2kb)	CDX2
cluster_1	chr13_28429635_28430555	23.022182783008	2.0004859191894	1.53736479991229	1.72139796054402	21.5536227960241	0.797272781707775	1.38558357090139	1.51285231317377	0.999893710907442	Exon (ENST00000282397.9/2321, exon 8 of 30)	FLT1
cluster_1	chr13_28438466_28439444	21.5647142169553	2.25112560056826	1.59360127688037	2.48905815120288	18.1078118283037	1.71350398886759	1.47702607166813	1.54321226890667	0.999801159981253	Intron (ENST00000282397.9/2321, intron 3 of 29)	FLT1
cluster_1	chr13_28493860_28495793	19.9599086735616	9.49257119466471	7.18980054128529	2.97229421861815	20.6053032933264	9.59474916341876	6.37964227976189	5.74476687181302	0.999788157983332	Promoter (<=1kb)	FLT1
cluster_1	chr13_28684146_28684895	18.4583449608301	3.30251293855432	2.82795752820697	2.28186877364691	16.9072113714337	2.58545464034362	2.0077353338845	2.716074002524	0.999928207938606	Distal Intergenic	POMP
cluster_1	chr13_29963967_29964882	15.1377140932579	1.77152978227328	1.00570604213713	0.768462533508601	18.9182685133091	1.1335306284431	0.464947736783166	0.830194536883616	0.999933104273846	Distal Intergenic	LINC00544
cluster_1	chr13_30051954_30052885	13.5787474758528	2.75945124338288	1.62738017650225	1.33210698241988	17.3566761261341	2.44682061408699	1.86739572436852	1.31027078736555	0.999946315913804	Distal Intergenic	LINC00365
cluster_1	chr13_30053790_30054342	15.5245637454281	6.56715588979517	2.62804965546215	2.3496809062149	15.9006988336572	4.33419886020215	2.23180615365969	1.63259136455166	0.999948906385174	Distal Intergenic	LINC00365
cluster_1	chr13_30862810_30864160	12.9208465189585	3.83315845859555	3.51812124855584	4.70695873082327	20.676875027447	4.28740053067034	2.02038829427832	6.78189377512139	0.996311091056421	Promoter (<=1kb)	LINC00545
cluster_1	chr13_33490233_33491111	14.4948265261406	5.63606864825261	5.50007718197364	3.24073975102368	13.4092740650045	3.58722042983336	2.9360740509515	2.80913755530403	0.999544137953319	Intron (ENST00000686875.1/90627, intron 2 of 3)	STARD13
cluster_1	chr13_34899955_34900988	19.8225757092258	2.31078237259806	2.45174576039049	0.763941942204935	22.2429396021843	0.961521232705358	1.3059974588995	2.0511168434595	0.999910306780013	Distal Intergenic	NBEA
cluster_1	chr13_35855488_35856042	28.8671509077116	5.61099796124554	10.1402830282033	10.5087394848617	28.8281039776468	8.14839036119665	6.66806755424601	4.5121421370679	0.998965264639016	Promoter (<=1kb)	DCLK1
cluster_1	chr13_35857495_35858307	20.8050607020881	4.11283186727429	2.32095363385729	2.02866656275611	22.4691703735751	2.6974805287548	2.00400739939938	4.89982303335571	0.999931360462945	Promoter (1-2kb)	DCLK1
cluster_1	chr13_38624710_38625577	16.049501235623	0.683591387418759	1.92591825200002	3.73021604257698	16.9405981492288	1.56244577567052	1.23356910328578	0.323963122251253	0.999528090760312	Distal Intergenic	LINC00366
cluster_1	chr13_40356221_40357026	11.5279185915865	4.55025032019666	1.15822531241654	2.23501951088695	12.1966776876178	4.86289720159914	3.55114008273665	1.18484089612303	0.999839792779761	Intron (ENST00000638084.1/646982, intron 1 of 5)	LINC00548
cluster_1	chr13_40651808_40652674	14.6211066998864	2.40555999201071	0.426806541796961	1.37821340467413	15.5994048544314	1.21391902339734	0.513990842575751	0.841223225255093	0.999981350673344	Intron (ENST00000379561.6/2308, intron 1 of 2)	FOXO1
cluster_1	chr13_40680425_40681436	20.3113988168553	2.33547826459516	1.60321340166312	2.20869118917319	28.3078968384494	0.897482165218189	0.878034146626811	2.00633191724448	0.999656716928801	Distal Intergenic	FOXO1
cluster_1	chr13_40734750_40735794	13.4412020672501	3.90930269486587	3.11122961512232	2.80421688205925	10.5851785457857	3.63130311018326	1.85068173461632	2.56832150784552	0.999638843529168	Intron (ENST00000323563.8/10240, intron 6 of 6)	MIR320D1
cluster_1	chr13_42169941_42170591	17.8041537113416	3.87542743886261	1.24835422988745	0.441235550845869	17.3718429127429	2.07347496773721	2.34017563747206	1.84254647382975	0.999985890043521	Intron (ENST00000379274.6/160851, intron 12 of 29)	DGKH
cluster_1	chr13_42333725_42334671	8.56521906960116	3.53320480854727	2.86964083134186	4.29445433610584	9.32333998448821	3.10845067211833	2.5057648080688	3.57471692669908	0.999428437385999	Distal Intergenic	LINC02341
cluster_1	chr13_42573871_42575336	12.6886455354719	2.61951551780897	3.41631847785526	2.10269931781163	12.988698625284	4.97187995331757	2.23844663596647	3.21101770214449	0.999885970569722	Promoter (<=1kb)	TNFSF11
cluster_1	chr13_42875540_42876703	13.2538745014982	4.35509900141042	4.80684230137749	3.22405704266788	12.0191663189605	4.02306383738284	4.36182776639616	2.52221481772764	0.999694765551341	Distal Intergenic	LINC00428
cluster_1	chr13_44648563_44649485	7.30073000138743	4.20736624971316	2.76639037316863	1.26834803850974	8.83112656849624	6.54772395338843	3.45978512309123	2.21211084264847	0.987426184639944	Promoter (2-3kb)	LINC00407
cluster_1	chr13_45329701_45330181	18.5807663918689	1.89997470989342	0.977283723249423	4.08564843868061	11.7199270746848	5.43089740075928	2.87461213108337	8.71263705045808	0.984215137875073	Distal Intergenic	SNORA31B
cluster_1	chr13_45370846_45371514	16.3956256660232	5.28343583990586	6.01508790493635	3.59648856764807	21.2342328354251	5.67837068134003	8.2210854945412	8.53101411887273	0.997803371663381	Promoter (<=1kb)	TPT1-AS1
cluster_1	chr13_49218268_49219185	10.6828866280828	6.85346726379878	4.3168698044625	2.23813783925317	14.4042262490987	8.91484658235782	8.16888641294823	4.31573393667568	0.982288422050224	Promoter (1-2kb)	MLNR
cluster_1	chr13_49628093_49628838	17.4979869267197	3.06434046557715	2.62618269029761	2.73836467746689	17.1856637407092	3.19292870368989	2.50196347612984	2.25909440205237	0.999969312881096	Promoter (<=1kb)	ARL11
cluster_1	chr13_49635346_49636393	24.8212935812797	2.34666207936552	1.37684585182977	1.28444476692814	23.5331723024303	1.74414949514996	1.13647712541406	1.6245051697728	0.999957234590574	Distal Intergenic	ARL11
cluster_1	chr13_50635921_50636703	12.6583316054714	5.00777587841979	3.50957290405631	4.1901767889341	9.69159479208263	3.54173045151672	3.37612586707184	3.10280089105358	0.998969822413267	Intron (ENST00000479420.5/10301, intron 5 of 5)	LOC107984567
cluster_1	chr13_51148147_51149371	23.0799676159238	3.71387575228896	6.1613582136951	4.42367409926671	23.0075546456437	3.90779661155126	3.99964536429678	5.68059511101261	0.999660156819933	Intron (ENST00000636098.1/647166, intron 1 of 4)	C13orf42
cluster_1	chr13_51169235_51170357	32.44481844563	2.31745522648254	1.77262458764358	1.04113642989868	28.3364255525735	2.01099323828293	0.90817589741546	1.21074207173275	0.999912726097348	Promoter (1-2kb)	C13orf42
cluster_1	chr13_51243108_51244421	20.2726159501236	3.64911997556909	3.48246067455562	4.78215622272266	21.6964306626628	6.55625496474564	10.365151291929	7.28607456876278	0.997996614323665	Intron (ENST00000615498.4/220108, intron 2 of 2)	FAM124A
cluster_1	chr13_51244554_51245480	19.8284941795325	2.9974358964695	1.40727037052377	2.26345219902471	21.9797096076555	1.76641753729977	1.55724416110215	2.37255651964732	0.99995582167259	Exon (ENST00000280057.6/220108, exon 3 of 5)	FAM124A
cluster_1	chr13_51302851_51303700	29.9312106015152	11.6558716942823	14.5152803711818	5.29680306208144	32.6160494812355	13.1520911873058	9.77567216521012	1.89991565154505	0.997915652244074	Distal Intergenic	SERPINE3
cluster_1	chr13_51646090_51646954	14.667554154627	1.72580445296817	3.17188203929295	3.1382451002927	17.4585898463728	2.12574078216019	2.39341444005314	3.0836790750252	0.999587676767421	Intron (ENST00000298125.7/115825, intron 1 of 11)	WDFY2
cluster_1	chr13_51844849_51845765	9.92675972481265	2.1309616783211	5.83836086425255	4.97796017494101	9.59789648297212	3.56868346655279	3.70570702933077	4.29208138045007	0.987615298012077	Promoter (<=1kb)	TMEM272
cluster_1	chr13_52274847_52275731	11.4281340520016	2.50635347614801	3.12661321114287	1.56776740616836	13.4236021719803	2.01566909589507	1.91914297489043	1.61048632165205	0.999852770743122	Intron (ENST00000451298.1/100887750, intron 6 of 21)	MRPS31P5
cluster_1	chr13_52906134_52907187	8.48147295511976	3.06357505358531	1.60365904121524	1.7392550463203	9.48674329515051	3.12500284116998	2.51962096517669	2.18878625300073	0.99999520222714	Distal Intergenic	PCDH8
cluster_1	chr13_52967922_52968599	15.4207706515982	7.06480612387171	3.5524123261399	5.79217785095597	19.2799899548312	4.26804232459008	6.83007574677427	6.41597787772006	0.999213084187931	Distal Intergenic	OLFM4
cluster_1	chr13_54268013_54268820	27.1941490786226	1.55076152850425	0.839330572412424	1.62776524565464	18.7383109665378	1.42202666399065	1.14548100443714	0	0.999224504807141	Distal Intergenic	MIR1297
cluster_1	chr13_54356694_54357935	12.9596064794823	9.00938491431161	4.46294964405147	4.35623731874588	13.8105045032696	2.95619076187976	3.15119866141198	1.99758000398906	0.995644158901768	Distal Intergenic	MIR1297
cluster_1	chr13_57633426_57633847	28.0909472695019	8.62011970850833	7.25126451566024	3.20167268115565	20.8157394666774	4.24780627410467	3.81209825534412	3.70911476538297	0.99881788193396	Promoter (<=1kb)	PCDH17
cluster_1	chr13_60261463_60262051	26.4762040355389	6.04006815467107	1.10930057259669	2.78657334754527	20.3391119933992	2.53119081382831	1.4683002371374	1.35369295139695	0.999698194623494	Distal Intergenic	DIAPH3
cluster_1	chr13_60584225_60585628	22.4618585049856	4.45720099971181	6.93578028421631	3.6985238749	26.1195582157126	3.18351552646871	2.9358408772686	4.54667966477143	0.99960166206203	Distal Intergenic	LINC00378
cluster_1	chr13_74026719_74027463	17.7212737229528	3.02283925681302	2.14911890097474	3.82037639161594	12.8227785366088	2.72400918474031	2.03790321136421	4.08006838340733	0.998613234655055	Intron (ENST00000377669.7/11278, intron 1 of 7)	KLF12
cluster_1	chr13_74036328_74036885	18.7629800646981	9.62220576818314	1.1307650392122	2.52563365936197	20.0548741781398	1.68231334217233	1.26165204201334	2.42618909457939	0.999278089036163	Intron (ENST00000377669.7/11278, intron 1 of 7)	KLF12
cluster_1	chr13_75803032_75803862	26.007705992418	2.33106204476213	1.4578956786915	1.61815147113925	26.8548385876795	2.42374632933104	0.823528249923284	3.86313913625358	0.999940326295784	Promoter (<=1kb)	LMO7
cluster_1	chr13_76019288_76020092	16.5985525896317	2.61550101345785	5.46991580822048	2.75623287817998	15.8258855921806	2.25584057157495	1.46834025572881	8.53093410079046	0.993776138591907	Distal Intergenic	LINC00561
cluster_1	chr13_76980005_76980610	24.4801153003886	7.86061774760262	16.7627169346644	7.74315012885018	23.8726922508741	7.33229086824507	7.67657652812531	5.56628298141047	0.988237072526465	Distal Intergenic	CLN5
cluster_1	chr13_77751481_77752205	10.3681899357907	1.97061493120501	7.66152958497219	7.11622181180893	10.822705943912	3.14255832358096	4.05110992015672	5.42985604085808	0.930419376367286	Intron (ENST00000418532.6/122060, intron 4 of 6)	SLAIN1
cluster_1	chr13_78586542_78587149	22.8580271212765	4.76268894683026	3.86534778759343	1.80603751534602	20.3237775718431	2.75033416896021	3.57314957575699	2.53346075664107	0.999893560147447	Intron (ENST00000607205.5/100874222, intron 2 of 3)	OBI1-AS1
cluster_1	chr13_78595578_78596890	15.8769786358824	9.54140771488775	8.77208012366951	2.31280292063144	13.1442846961265	9.62695868016536	7.81102665329038	3.80073738679222	0.9737448509228	Promoter (<=1kb)	LOC780529
cluster_1	chr13_78607454_78608109	19.8137835542839	8.41769941145412	4.68754294880301	1.86654514136885	22.0769450357598	6.56019980766766	3.76232429137978	2.4207644665655	0.999931475224398	Intron (ENST00000606429.5/100874222, intron 5 of 5)	POU4F1
cluster_1	chr13_80296655_80297645	15.8898882933801	5.07371295095045	4.7215934696511	2.37403078644235	18.2511011053558	2.6444398855619	1.12186948669937	1.05474651751367	0.999696943929324	Distal Intergenic	SPRY2
cluster_1	chr13_80359248_80360233	21.017518238443	22.7150512875174	11.5848571911131	4.5755790910755	21.8928172966574	13.4294227908847	9.70785353988209	2.46407450798468	0.888145657831383	Distal Intergenic	SPRY2
cluster_1	chr13_84654663_84655398	19.7347073905118	4.32834603116023	2.39005389752933	1.17439000435468	18.0198208628587	2.59194433569706	1.8249228354605	1.47013402452993	0.999969584925067	Distal Intergenic	LINC00333
cluster_1	chr13_86932805_86933473	18.6996101014166	2.85885266164343	4.38826553383779	1.67354643626122	21.4468961631941	5.1028784394067	5.18427577340358	2.70261496329963	0.999832768881648	Intron (ENST00000609962.2/106144533, intron 2 of 3)	LINC00430
cluster_1	chr13_90973995_90974899	13.6287346421102	1.64766372867501	2.34285667003863	1.82802424750114	12.8267352295459	0.951494411146971	1.17611838378475	1.37237036610984	0.999760746804004	Distal Intergenic	LINC00410
cluster_1	chr13_91174762_91175710	9.25691269324554	1.32428140919841	2.60556745820767	2.04668339648286	10.888703511948	1.85234331077263	1.32891098861706	2.19515617772225	0.999562328185368	Distal Intergenic	LINC00379
cluster_1	chr13_93215951_93216641	22.9891572539048	1.66985078283042	1.58835291447975	1.90860825018096	21.1164951280048	2.20213618399557	1.51549761032282	2.46711463969883	0.999902591494971	Distal Intergenic	GPC6
cluster_1	chr13_93233535_93234528	6.49686974527841	3.17148325381739	1.54782116082011	1.45007940485887	11.7328977725286	0.999512501479108	1.16563066689638	3.01219363525347	0.995192402246815	Intron (ENST00000377047.9/10082, intron 1 of 8)	GPC6
cluster_1	chr13_95403561_95404668	20.3095242713277	10.1638588937926	11.7475753466318	9.15189896290722	20.0782848864066	8.87391462500918	9.50212747184001	6.84199269709226	0.998788991535764	Distal Intergenic	CLDN10
cluster_1	chr13_95478443_95478990	12.3516074715901	5.99889651660374	8.88246320162816	2.23943330839997	13.6007929614555	5.2567120641487	3.85503741613482	3.62013381690465	0.990782529453187	Intron (ENST00000376873.7/9071, intron 1 of 4)	CLDN10
cluster_1	chr13_95552198_95553798	21.813170591988	8.75289167093618	8.96168135350358	4.00924193661709	22.8084461689677	8.64123835771568	7.79872726467659	4.07749863196165	0.999693889702193	Promoter (<=1kb)	CLDN10
cluster_1	chr13_95641442_95642346	17.1642697883043	6.30767849254976	5.27947688485476	3.26979031887126	17.244804664334	4.57602326503093	4.53488832420911	7.66063100233842	0.999561667775955	Promoter (<=1kb)	DZIP1
cluster_1	chr13_97266790_97268150	10.337118100451	3.11042060985438	3.1227841037378	2.94944194563302	15.7494180855156	3.12188255221865	4.17719263947978	2.46987366624185	0.998610736218328	Intron (ENST00000397601.5/10150, intron 1 of 6)	MBNL2
cluster_1	chr13_98327497_98328493	17.2467521082788	19.2239333427704	9.22629828274595	4.374718709449	16.3935957285812	16.0708528410308	6.67270378668293	4.8681908113853	0.779203181074445	Promoter (<=1kb)	FARP1
cluster_1	chr13_98751427_98752842	11.1429452572219	5.53035621157227	4.20658369843545	2.06168838309848	9.36029700930758	6.52252296718166	3.72712649381583	2.07924753640946	0.995864518437869	Promoter (<=1kb)	SLC15A1
cluster_1	chr13_98937789_98938325	32.3917522920777	4.21297270075361	1.31391975872027	2.34583941600552	25.8079269818082	3.34228485475971	2.61528132776126	1.94469130792625	0.999845350479036	Intron (ENST00000682017.1/23348, intron 2 of 52)	DOCK9
cluster_1	chr13_99176302_99177128	9.7237758385257	1.55333120260421	2.75548385246908	3.88727146103267	9.32962362638087	4.63168662665768	2.53002152450843	4.71669217387331	0.995976838142581	Distal Intergenic	UBAC2-AS1
cluster_1	chr13_99661706_99662237	17.4478843506232	23.3858516347428	5.8805091907544	2.44024991025479	21.9892430801851	12.1933998137248	5.38198349947267	3.46540056859818	0.879453310142931	Intron (ENST00000376355.7/171425, intron 1 of 7)	MIR4306
cluster_1	chr13_99686670_99687598	38.8776803440514	5.80981169515993	3.35720597436645	4.32501208906426	42.2609197635713	6.30599009769412	4.44170521607527	3.94190874422154	0.999986109536902	Intron (ENST00000376355.7/171425, intron 1 of 7)	CLYBL-AS2
cluster_1	chr13_99702582_99703653	18.9190627422849	1.68487059301198	1.38851334748784	1.88919313914396	18.0333731690815	2.47938546915328	2.41458921200987	0.784679035513957	0.999941262838324	Intron (ENST00000376355.7/171425, intron 1 of 7)	CLYBL-AS2
cluster_1	chr13_99703903_99704751	16.156828866968	5.44960191145533	1.09676205071466	0.742367165329331	12.2736707915454	1.56068806833376	1.13240053391481	1.71821631308277	0.999376958004341	Intron (ENST00000376355.7/171425, intron 1 of 7)	CLYBL-AS2
cluster_1	chr13_99978913_99979378	29.7694725442751	15.4068348336115	13.4210541681221	5.62738341784231	38.1164602140054	13.6038350629356	9.64822611011422	5.27303536567541	0.999077451952078	Promoter (2-3kb)	ZIC2
cluster_1	chr14_100108057_100108805	11.3502490476812	5.47624076755812	3.1620069700663	4.65791018811815	10.9205604823582	5.35394743423668	4.84941062303989	4.60966167882448	0.999931515233695	Promoter (<=1kb)	MIR151B
cluster_1	chr14_100158973_100160215	13.3587331313178	7.03357243515598	3.03980936885014	6.81064096839572	16.2812262223189	8.43660550905679	7.07553390476448	4.82701460927222	0.998283794201692	Promoter (<=1kb)	DEGS2
cluster_1	chr14_100284536_100286024	27.5145663409003	11.4668312340073	8.17454161010672	9.55625554033995	29.7700395027448	14.2639133018336	16.6894429463122	10.2400011919904	0.999048709476242	Intron (ENST00000553954.1/123096, intron 1 of 1)	SLC25A29
cluster_1	chr14_100317913_100318732	17.8260685699359	6.08893405974888	2.00935757839702	2.73077931405379	16.7251453483717	3.37228513016959	2.68472819651689	4.75520976932187	0.999908686849931	Distal Intergenic	SLC25A47
cluster_1	chr14_100708312_100710052	12.5114880501642	8.78942513609553	3.32296984274476	3.32385347405721	14.9862164300345	6.80788683766106	3.80194426918817	5.32464417912064	0.998600388881437	Distal Intergenic	DLK1
cluster_1	chr14_101476803_101477622	15.3736522833408	6.41777796576844	3.29153849364492	2.63519940484992	15.1401150936557	10.3874067252015	5.0060250369075	1.9455300341451	0.996835850107089	Distal Intergenic	LINC02314
cluster_1	chr14_102510694_102511263	24.9646826229911	13.1374985011465	4.50976149373668	4.26189647017927	32.4198240483602	16.1496372919738	9.41329525693431	8.30986757161647	0.998677870442875	Promoter (<=1kb)	ANKRD9
cluster_1	chr14_102545048_102546147	18.8388718828538	5.50759500855759	3.00080558474642	3.13891644991117	16.9607089076835	5.60333516497187	2.56887596716275	3.82627418482441	0.999974143965219	Promoter (<=1kb)	LINC02323
cluster_1	chr14_102554745_102556022	17.1226100542553	11.2857969866201	5.36431020796509	3.94256000567955	16.875002467835	8.88788424505456	5.93654888788317	5.58238427855104	0.998782124548694	Exon (ENST00000559946.1/105370681, exon 3 of 3)	LINC02323
cluster_1	chr14_102567888_102568750	14.4548251978313	2.57296841145289	0.772067484371681	1.31235776895188	9.88181636180077	2.2502745394578	1.63042299203979	1.91380813601586	0.999230725820621	Intron (ENST00000701178.1/ENST00000701178.1, intron 1 of 1)	LINC02323
cluster_1	chr14_102629878_102630744	12.5717551814977	3.9864365605753	0.898240982344536	1.49617362643197	8.86880497671729	3.12630334232896	1.03734533542473	1.87077097626688	0.999144008268198	Intron (ENST00000262241.7/23186, intron 2 of 11)	RCOR1
cluster_1	chr14_102760527_102761438	14.7300209818032	3.85163778373207	3.80014796915062	2.76342243096556	13.6399854529009	3.51216759808692	2.46278866861836	2.31359810983349	0.999927791206971	Distal Intergenic	TRAF3
cluster_1	chr14_102927752_102928859	20.2713556188342	13.5902751562311	4.47735351770486	5.3018637797975	20.1669079640801	13.0418504642586	9.83412862451993	5.97397191615394	0.994819336418845	Promoter (<=1kb)	AMN
cluster_1	chr14_103109736_103110414	13.0590790602979	6.68511543958261	4.72069720964297	3.53093300062989	12.7577790597325	14.0377451748283	7.13961495809539	2.77044907778904	0.917626819461672	Promoter (2-3kb)	EXOC3L4
cluster_1	chr14_103121826_103123412	16.0563494007874	7.46623129516577	4.55178231884394	5.51377519988319	14.7243554089041	11.7479467852419	6.43258774754223	7.25287068483205	0.996033625494556	Promoter (<=1kb)	LINC00677
cluster_1	chr14_103188932_103189799	10.7498353317701	4.49531345277044	1.34546542829632	2.2520103824607	11.5855573543765	4.68450975443793	2.62608333763564	3.02122381631665	0.999954620141068	Promoter (<=1kb)	LINC00605
cluster_1	chr14_103220205_103221002	9.70736465230302	3.44545625359062	1.84651901423617	1.70712798638056	10.5646580233142	6.17152663599893	1.87457132907491	2.85281560731539	0.999076563145142	Distal Intergenic	LINC00605
cluster_1	chr14_103518627_103518883	31.5846318531426	17.4831157214896	7.87275887947486	19.095130530151	30.9720534224497	20.4278858938855	12.7540797780364	12.6856819386423	0.995544923821927	Promoter (1-2kb)	CKB
cluster_1	chr14_103854898_103855917	12.1208638164819	5.39289772949937	4.63601157909272	3.49919983049809	17.6304109145765	6.51861755450672	4.44747154146618	2.96005800630813	0.999112648735233	Intron (ENST00000556586.1/145216, intron 2 of 2)	PPP1R13B-DT
cluster_1	chr14_103871526_103872502	14.3321308547814	3.88157543103383	2.56979113134067	1.78712495570263	16.3948391120119	5.29508945211198	3.40449149542487	2.33301996866736	0.999984503923223	Promoter (<=1kb)	LOC105370689
cluster_1	chr14_104077827_104078425	12.8778681294737	4.98278015272402	8.82927198629765	8.74960319489525	16.8652952418361	7.41834675658423	8.83603620187388	14.6856882118145	0.874604688881686	Distal Intergenic	ASPG
cluster_1	chr14_104094295_104095071	10.6003695152669	6.03305719359561	3.33342320481426	3.85405562607128	11.8077034453619	4.04575565411615	5.77205237030322	3.12627058133736	0.999301076394529	Promoter (<=1kb)	ASPG
cluster_1	chr14_104170990_104172128	13.6500809280183	9.73376712370152	4.15837736402465	3.45244996284559	24.2717707112529	6.92120607157068	4.81802814166399	3.82373584982335	0.995583965541633	Exon (ENST00000697132.1/26153, exon 6 of 15)	KIF26A
cluster_1	chr14_104681342_104682670	26.6025416720716	13.2102841568544	5.39725731973488	4.7533120709759	30.790873697016	14.4581439285348	7.71182877977858	13.5474266096814	0.998976778792275	Promoter (<=1kb)	INF2
cluster_1	chr14_104708180_104709028	19.6693346132842	7.25888756943522	4.66203772057578	7.78520301168256	16.1613957098527	6.42836441209373	5.14127217413432	6.7896359621763	0.999207281773015	Promoter (<=1kb)	INF2
cluster_1	chr14_104768391_104769352	24.9153595495385	16.5440690401364	10.8546440781921	8.73198065450638	27.8261699100611	16.4656429465098	16.1754193494152	8.23426844149841	0.99639429303008	3' UTR	AKT1
cluster_1	chr14_104843074_104845050	12.7606840118027	7.06221035811292	2.50807743684877	3.62315605424887	15.7077445319698	6.69245035278889	5.15746707379861	4.09260491700655	0.999665615370065	Exon (ENST00000556430.1/ENST00000556430.1, exon 1 of 1)	CEP170B
cluster_1	chr14_104872859_104873556	10.1172695504638	4.06353631522778	2.77550362343316	2.31983751506577	15.467793263456	6.66085635310795	4.08013723549332	8.35193129626694	0.987363045162008	Intron (ENST00000414716.8/283638, intron 2 of 18)	CEP170B
cluster_1	chr14_104876142_104876758	17.9823947658096	6.42099682430967	4.40586018332479	2.99619133097222	21.9611269871765	4.7527981945484	6.4371265298569	5.70389571095895	0.999830511316627	5' UTR	CEP170B
cluster_1	chr14_104882206_104882797	12.0605018758495	4.43234861825513	3.25571074666922	2.79737759258795	17.8636030151304	7.06252212929306	5.7234481343882	3.7413365445624	0.998459218131814	Exon (ENST00000414716.8/283638, exon 7 of 19)	CEP170B
cluster_1	chr14_20657358_20658188	21.6492757797026	4.22166532856322	1.3990289256341	1.97054908001125	23.4810031934239	2.114957334562	1.38198914170829	0.55179670642253	0.999983674280922	Distal Intergenic	OR6S1
cluster_1	chr14_20873471_20874153	11.0718756786627	2.84750473610712	2.81532804024405	3.37958448707018	12.4694131784681	1.72652288076022	2.54630419257808	2.56670303572061	0.999639381134722	Promoter (<=1kb)	LOC100507513
cluster_1	chr14_21534481_21534989	20.7815984965796	10.5784033038343	5.80547014137621	4.54375087016443	24.5071878588993	10.005533845773	5.95034883718864	4.09504913960567	0.999848440710949	Promoter (1-2kb)	SALL2
cluster_1	chr14_21543463_21544046	15.3852900299605	9.75891254988893	3.68979740318046	4.24785908383417	10.9114423363849	6.27735193269451	3.79133666867103	2.74830546096411	0.989048465600456	Distal Intergenic	SALL2
cluster_1	chr14_21723344_21724077	12.340324849274	3.88865643125603	4.9114906445528	2.04118039745537	13.1092464568877	3.9536916612602	3.91342291991168	1.89673176838029	0.999652574265366	5' UTR	OR4E1
cluster_1	chr14_22570170_22571099	11.6677770852439	7.69626190453998	2.92816924083936	2.80254650916332	16.4259920908059	6.9372267993162	5.27687089491493	3.54679128555217	0.998157596609931	Intron (ENST00000489532.6/1603, intron 1 of 2)	DAD1
cluster_1	chr14_22837743_22838531	9.78912837042481	3.01295191769888	2.32515057759437	1.45714481584159	13.3424783191104	4.67689668816814	2.84052804597266	9.84961374918014	0.968044875802866	Promoter (<=1kb)	MMP14
cluster_1	chr14_23154179_23154813	10.851943065953	2.03890672736826	2.21597655900302	2.24652954936742	10.915866336884	3.7984201296056	2.8721424530447	4.63069500320821	0.999403367591596	Promoter (<=1kb)	SLC7A8
cluster_1	chr14_23251871_23252922	13.5763893019022	0.984232407554009	0.947534073428803	0.860108862812081	14.2974550326048	1.66676024468361	0.979734184611648	1.3193238459796	0.999964434737875	Intron (ENST00000399910.5/100507650, intron 5 of 15)	RNF212B
cluster_1	chr14_23537174_23538392	25.8103508590855	3.327123441792	2.31135025296119	5.15343681417741	32.7351812330245	3.95045353251655	2.64022287021661	2.45971816475375	0.9998240535377	5' UTR	ZFHX2
cluster_1	chr14_23910493_23911283	9.80769071842982	2.68384399286488	2.85126058794224	2.72895083918331	16.5455818145065	1.58431532716212	1.81620323130737	1.07131026343015	0.997636668083825	Distal Intergenic	LINC00596
cluster_1	chr14_24171392_24172314	33.8379918285337	19.0434539547843	19.1982479746358	8.47088197217987	48.9228376906388	32.4147090378292	24.3004655995006	10.4273531821832	0.973591850684588	Promoter (<=1kb)	REC8
cluster_1	chr14_24332060_24333061	19.386574237264	12.5737382806351	9.90623393900418	7.79292322554161	25.9239608466347	7.73457896855966	9.19867700803817	5.69043533129497	0.99798921167869	Promoter (<=1kb)	ADCY4
cluster_1	chr14_24376143_24377042	14.9368862512693	4.02204321053181	2.13585496258705	2.34932902625854	20.0050074234534	3.84394881445114	1.75971872214899	3.06333142645823	0.999888007156833	Promoter (<=1kb)	NFATC4
cluster_1	chr14_24481484_24482284	8.23567838151625	1.92046222250204	2.20372981049755	2.78420382345903	17.6512693827194	3.49746428797467	3.49664498439473	1.91483352275845	0.991429815532005	Intron (ENST00000656888.1/101927045, intron 2 of 2)	CMA1
cluster_1	chr14_35336478_35337128	10.8332198735348	8.66129666947857	3.92047213456801	1.96250055683454	13.8183493787966	7.17108604416331	4.13562454870302	1.5779802790596	0.990939895088084	Distal Intergenic	PSMA6
cluster_1	chr14_37167619_37168245	22.7680158173619	0.89004931634333	0.861186403798703	2.56943486737721	20.5367872148102	1.99046989599509	1.66346266283802	1.05012931944822	0.999843820844208	Intron (ENST00000331299.6/89874, intron 1 of 9)	SLC25A21-AS1
cluster_1	chr14_37591369_37592309	18.1941934645786	6.09096632153029	4.74144224229692	2.67392856745991	22.4343907220216	9.73606110964435	8.88163074244437	7.7437732812122	0.998757546241681	Promoter (1-2kb)	FOXA1
cluster_1	chr14_37622128_37623049	13.9818873820341	4.68010054415402	6.53701977781531	2.41421118028682	13.9263428619067	4.82581506115636	3.72302492639486	3.32652946407549	0.999322826163587	Exon (ENST00000553443.6/319089, exon 3 of 33)	TTC6
cluster_1	chr14_38189865_38191202	23.4747215641536	1.47841729262737	0.329916749204144	0.805991922876835	23.3366981188429	0.8004872102261	0.384650726386434	1.44312432498762	0.99995463534201	Exon (ENST00000702013.1/ENST00000702013.1, exon 1 of 2)	LOC105370456
cluster_1	chr14_38202403_38203108	35.0357597349936	3.40498904932202	1.07361778847759	2.37277712213921	33.7881441706516	0.496908311162883	1.69833445609592	2.23380768961805	0.999918917565073	Exon (ENST00000555655.1/ENST00000555655.1, exon 3 of 3)	SSTR1
cluster_1	chr14_38207773_38209704	17.2097084305811	5.37711136525903	9.77515196613861	8.66771704237803	12.9467341912391	5.63546009886332	6.64440263229122	4.78014577166247	0.977044562844569	Promoter (<=1kb)	SSTR1
cluster_1	chr14_38255007_38256561	14.9422289839293	6.38679140898488	6.33144543087041	3.65856070176563	18.7864527448004	7.22755113858639	5.2145001075205	3.16089834738451	0.999615800750326	Promoter (<=1kb)	LOC112268136
cluster_1	chr14_39016936_39018051	14.916582863389	8.40438290613208	6.46596099197502	3.92916015785382	14.3396378214631	6.66505288596443	4.14097200325714	3.19572584355162	0.999010625816947	Distal Intergenic	SEC23A
cluster_1	chr14_45550951_45551980	12.9744002805022	5.72648319849444	5.95854754860301	2.41324172817728	18.2376967076943	5.58980968066803	3.08297136170154	4.51360536018708	0.998944688777768	Distal Intergenic	LOC105370476
cluster_1	chr14_48260313_48261087	16.920096733696	0.811623969961829	1.04895414624467	0.95290464238475	19.0859240171172	0.476970130819946	0.394685099920594	0.219267684891943	0.99991536713398	Promoter (<=1kb)	LOC105370482
cluster_1	chr14_49853655_49854143	17.6754519180633	3.34070900682449	8.5478359840449	4.62837576362097	13.6864847526176	5.38229731508183	3.42158096357908	2.19447463389114	0.992603749353422	Promoter (<=1kb)	RN7SL3
cluster_1	chr14_49879602_49880380	12.1919037232268	2.83966975371664	1.32960550691473	2.44633820515971	14.6189777823294	2.89391193084986	1.48500828502877	2.48765434712694	0.999953948625528	Distal Intergenic	LOC105378179
cluster_1	chr14_50401574_50402118	21.969795803812	5.06668168709936	1.30241750069339	1.38656610560205	24.8581263399386	2.91793748762041	2.57577039655555	2.9562609279714	0.999988441878941	Intron (ENST00000356146.5/8814, intron 2 of 19)	CDKL1
cluster_1	chr14_51776142_51776946	11.4349311157339	5.31378463598623	4.18958543533303	4.1529102874368	12.0615890040711	4.27779407521518	2.89381263321945	3.27318941446394	0.999918697531526	Intron (ENST00000553312.1/101927598, intron 1 of 9)	LOC101927598
cluster_1	chr14_52267359_52268901	14.3546942340037	3.64784327022458	4.32457889907691	3.33590587778329	15.1657686794945	5.54478369501265	5.03935155409012	4.77151708921001	0.999883594016848	Promoter (<=1kb)	PTGDR
cluster_1	chr14_53355405_53356334	23.5076922794236	5.75470544903547	5.75007925267015	5.16792388425007	24.4878003055944	7.61957736494474	10.3734016119463	9.25783875106482	0.999342943638485	Intron (ENST00000666968.1/105370502, intron 3 of 4)	LOC105370504
cluster_1	chr14_54361912_54362704	24.0958206382236	1.46187137089814	3.90452073988111	3.73494859176078	28.0269680634993	4.65617820972449	4.72470112786988	2.62937657403892	0.999764835637135	Distal Intergenic	CDKN3
cluster_1	chr14_54684174_54684971	13.4864998010263	1.6590653758103	1.24515592664618	1.90260624975796	9.58827592955105	2.14176275481443	1.58626079344738	4.37175763317499	0.997471096033544	Promoter (2-3kb)	SAMD4A-AS1
cluster_1	chr14_56794198_56794782	19.8961690270387	6.9850129700376	2.21645700577022	0.957598264260203	15.666766198181	5.95629733541156	4.18332880797804	3.56213178582137	0.999577387170293	Distal Intergenic	OTX2
cluster_1	chr14_56805440_56806241	17.8051351257542	7.21772067654906	4.20180310507071	4.31293604915872	20.8908616435671	5.63210004297263	3.15650607283098	1.6256493017745	0.999896706770743	Promoter (<=1kb)	OTX2
cluster_1	chr14_56846797_56847899	28.5145670771152	2.20202125855583	0.681387998730786	0.879917408202998	36.3834360599865	2.28311192519274	1.64532004165155	2.81243120522231	0.999907796516825	Intron (ENST00000534909.2/100309464, intron 1 of 3)	OTX2
cluster_1	chr14_56894400_56895368	19.8905331600049	2.91366767229566	2.19128838879032	2.81167011711886	21.8648360591463	3.85737720624312	3.91543970290434	2.94068173430121	0.999960924537515	Intron (ENST00000534909.2/100309464, intron 1 of 3)	OTX2
cluster_1	chr14_57343389_57344180	12.0056933733771	4.56407512251609	3.61526724006746	1.84849812628808	11.4811483149246	2.29351825077891	1.03102480279632	1.5276519659376	0.999607511853284	Promoter (<=1kb)	NA
cluster_1	chr14_58395504_58396629	24.9273237906858	11.3906002014128	10.3381209808991	5.2281858342655	21.589339345617	11.3083021218179	9.35445168078639	7.53158001061108	0.999369931509015	Promoter (<=1kb)	TOMM20L-DT
cluster_1	chr14_58768860_58769625	12.0902133675594	8.12947440932806	0.884623424394653	1.64944157880542	23.4457579137626	4.31468076158714	2.15291362456016	2.19189477764183	0.995561512269608	Intron (ENST00000648996.1/102723742, intron 4 of 13)	LOC107984642
cluster_1	chr14_59576269_59577129	21.8861415753334	10.9711462200631	15.1687515599542	8.40529587390751	23.2031081972563	12.3995807868518	15.1243130439743	5.79182833239793	0.982546756299254	Promoter (<=1kb)	CCDC175
cluster_1	chr14_60317451_60318175	19.247369063863	1.67530357394008	0.551228847432953	1.23833799390731	18.3321867392138	0.790229912438304	1.07168970683717	1.30515184685063	0.999936315742087	Distal Intergenic	LINC02322
cluster_1	chr14_60642098_60642921	17.8764200577577	9.19323092688533	5.41578704550382	4.03797452757883	16.8206906654532	8.6223129107836	7.82250724573234	4.29624866891466	0.999500535940963	Exon (ENST00000555871.2/ENST00000555871.2, exon 2 of 2)	SIX1
cluster_1	chr14_61188137_61189616	9.93852368341828	3.52099756796912	2.74936983110285	2.10300580809529	10.1719544755568	3.1137511112932	2.03607985644743	1.63505098349403	0.999981533763743	Promoter (<=1kb)	PRKCH
cluster_1	chr14_61280252_61281743	19.980226213332	5.58012363831717	4.55839338288115	2.6383672904109	24.6203399734091	4.23081108931554	2.30197522304004	2.1129716588027	0.999921382531853	Promoter (<=1kb)	TMEM30B
cluster_1	chr14_61320945_61322088	15.0701807140726	7.51503201167093	5.11645336991658	3.6493811737418	15.2280747660235	8.42665109918291	4.40853208282306	4.74193826117314	0.999793390020365	Promoter (<=1kb)	PRKCH
cluster_1	chr14_61537468_61538260	13.6551400586941	6.21423436001854	2.41656022384295	3.34956391756886	10.300727545449	4.58290694495062	3.21027248394427	8.88019271216543	0.982772675488072	Exon (ENST00000654868.1/105370525, exon 2 of 2)	PRKCH
cluster_1	chr14_61567780_61569113	12.3635304141828	9.72576749049486	5.01478823888852	3.7937051135818	12.4099844504385	11.0641111686977	4.91023250894411	2.96611627594404	0.959982151186998	Promoter (1-2kb)	LINC01303
cluster_1	chr14_61929845_61930967	10.2872835210156	0.80574109591167	0.809335240879873	1.39462625645358	8.47490461392039	1.95723271638719	2.26494965975697	4.17520066342463	0.996984963894576	Intron (ENST00000554138.1/83851, intron 1 of 1)	SYT16
cluster_1	chr14_64060413_64061235	19.8081902453886	4.25504807277602	1.93393667128721	3.19900053927519	18.0053891369986	4.05152667652904	1.63336370088614	2.81929232401512	0.999964319566056	Intron (ENST00000358025.7/23224, intron 49 of 115)	SYNE2
cluster_1	chr14_64391262_64391855	28.6046634478722	2.59554941585843	1.26064779746582	2.2377253934096	33.6436808833813	2.48824358468176	0.895200244188874	0.957328693183879	0.999956231215022	Promoter (2-3kb)	MTHFD1
cluster_1	chr14_64645207_64646040	14.8745575847762	13.5548380546556	2.57986999706155	2.93278940378533	14.3586042897925	8.94415180732728	2.94421522855618	4.25979767970035	0.970459321269102	Distal Intergenic	PLEKHG3
cluster_1	chr14_64703002_64703450	30.8686091867778	10.3776009468505	4.57020245187851	3.19076197999228	36.1450898223734	8.74764234477189	5.91927651529404	7.80555712601936	0.999981529246893	Promoter (<=1kb)	PLEKHG3
cluster_1	chr14_64708130_64708663	35.1472601409723	11.070747470897	1.80715652861531	3.63910788053921	31.8557849729369	9.75995080485449	4.64796611081466	10.0605548407468	0.999853505757027	Intron (ENST00000555982.5/26030, intron 1 of 4)	PLEKHG3
cluster_1	chr14_64715240_64716552	15.0260226322191	7.66122812504754	3.63261539094513	4.34536068238804	18.4355559756508	5.89997533738443	6.10495244018205	7.64291581621824	0.999500108704101	Promoter (<=1kb)	PLEKHG3
cluster_1	chr14_64716661_64717271	23.0656864829283	4.50375091410383	2.38568074736537	2.38695728439175	26.9071932066817	3.86247164540999	2.24220626535555	3.98070296159985	0.999974102342565	Promoter (<=1kb)	PLEKHG3
cluster_1	chr14_64736180_64737481	8.9771869542853	4.84370083036972	2.35530511961979	2.131705746288	9.00131946960248	3.57238305410955	2.89783527177148	2.32357576063138	0.999903655871416	Promoter (<=1kb)	PLEKHG3
cluster_1	chr14_64974358_64975003	16.7657298661676	2.12457813840637	4.19780394290597	1.97718726951974	20.4956804383412	3.07415363761407	1.22689939672491	1.01744734066275	0.999747390525647	Promoter (1-2kb)	RAB15
cluster_1	chr14_65186983_65188333	9.89437275585238	3.11501373463582	2.48823240065236	2.64904103803583	10.8344311781348	4.6085376972652	6.30469358906085	2.0899222901484	0.996628303332083	Distal Intergenic	LINC02324
cluster_1	chr14_65255195_65256227	16.8742063108269	8.70257695033232	3.32257454610903	3.15590493217836	21.761156296725	4.25403913040697	3.87643469000166	3.46426554041549	0.99972862610638	Intron (ENST00000555736.1/ENST00000555736.1, intron 1 of 3)	LINC02324
cluster_1	chr14_65334171_65335330	11.6665340468103	2.93895022411161	1.10536286806718	1.47364447474061	16.9735376560727	2.2877661454105	1.31336981533992	3.20132034634535	0.999581807250076	Promoter (<=1kb)	MIR4708
cluster_1	chr14_67526552_67527251	18.0278458438726	7.48835693090811	4.6021040443251	4.24570535567613	18.1055681590303	6.61042540148896	5.90999070119509	6.18067054426242	0.999992330037426	Intron (ENST00000554278.6/161145, intron 1 of 2)	PLEKHH1
cluster_1	chr14_67541464_67542558	15.146803494205	2.30857710942466	0.855298726873319	2.37399082342856	13.047198176085	1.44525732887453	0.575133808960435	1.45647997985817	0.999824506476014	5' UTR	TMEM229B
cluster_1	chr14_67728819_67729697	16.5433137080786	4.99153189613538	2.96532930197764	1.88863472931665	19.5296986994305	3.65403318050181	3.8863075941681	1.55059742029764	0.999963528639413	Promoter (1-2kb)	RDH12
cluster_1	chr14_67933845_67935001	16.6348349872682	3.25659873927711	3.23820559970634	5.36452949890703	15.9134888698163	3.2346150496574	4.52642740302739	6.73214064932553	0.998543145583635	Intron (ENST00000479335.5/5890, intron 8 of 11)	RAD51B
cluster_1	chr14_68471119_68472165	24.186395348619	15.8588655943996	7.54689408332573	6.34466539294504	26.9455516051799	10.4710976570294	12.8878754458285	5.50661079150543	0.998028875591007	Promoter (<=1kb)	RAD51B
cluster_1	chr14_68762863_68763685	12.249564307328	6.0480900405252	3.50045450874175	3.13446654072137	11.6493177491665	7.77205184297416	3.1845492584888	3.29621704787006	0.998711560317199	Distal Intergenic	LOC107984709
cluster_1	chr14_68786769_68787596	15.461984662401	6.26370222835595	1.81343194231448	3.02363535843511	11.577685333654	9.25281781748543	3.68720321586302	2.42362534336154	0.993636650912739	Distal Intergenic	ZFP36L1
cluster_1	chr14_68797166_68797741	28.9434952566417	4.1479449648328	1.44389887593218	2.59775508523756	29.726479881261	4.19948382092755	2.72192873162019	5.20641371772851	0.999969973089187	Promoter (<=1kb)	ZFP36L1
cluster_1	chr14_68819343_68819775	11.7445789007597	3.89922651129626	2.06980358463355	3.83871971212338	15.1207601536961	6.89789702122464	4.36417219187703	5.56689929120107	0.998762470439621	Distal Intergenic	ZFP36L1
cluster_1	chr14_68824604_68825301	9.39488679504631	1.97636673173191	2.71144494851479	4.9884991779112	16.9633847734754	7.26525412386163	6.13407693089293	8.11659040883021	0.964083893903163	Distal Intergenic	ZFP36L1
cluster_1	chr14_68987718_68988302	14.5213540078045	9.08236184281105	5.38169840865734	3.09824335632048	10.5028489502733	5.39136133055903	1.85762345504422	1.54313430348033	0.983830965513107	Downstream (<=300bp)	ACTN1-DT
cluster_1	chr14_69013948_69014602	14.0075524642713	3.53575793015364	1.24184928489651	2.57216869692043	12.7785343488807	5.93626186165273	2.47290274741164	11.9833328201323	0.962011049284989	Distal Intergenic	ACTN1-DT
cluster_1	chr14_69346571_69347228	13.5877410119307	2.55760834620516	2.79005337256247	2.30083182262078	15.6439690769731	4.56117917775739	3.50164089360375	1.41904584458456	0.999910772217015	Exon (ENST00000337827.8/57452, exon 13 of 16)	GALNT16
cluster_1	chr14_69483817_69485247	17.9231301650962	9.51625787623489	5.96002478903769	3.58014859604961	23.3082916448554	10.6701583916831	10.3820812796426	6.92207408226586	0.998265250319925	Promoter (<=1kb)	PLEKHD1
cluster_1	chr14_69571712_69572534	12.8793359666615	3.18602377039607	1.73357386264813	1.71363813319195	13.727071446156	2.01892130290287	1.18052763772489	5.04980912111963	0.999481788204585	Promoter (2-3kb)	CCDC177
cluster_1	chr14_70045749_70046539	13.1598094415174	3.38210567277339	4.41186212054721	4.08464382296535	10.1501313644523	2.8643272912062	2.45062584193572	3.60091570187011	0.997799747372866	3' UTR	SLC8A3
cluster_1	chr14_70416463_70417355	15.2714176240018	7.67092901562539	4.84277718214656	8.40341016815044	14.179762199414	6.77812310749347	5.65336326373635	6.40944989053451	0.999074175096379	Promoter (<=1kb)	SYNJ2BP-COX16
cluster_1	chr14_70655103_70655953	18.8669679797011	1.65731676744234	0.681303236601708	1.48697206065046	17.7150128261841	0.598305750061623	1.06260031929408	1.33312352491296	0.999906034493094	Intron (ENST00000256367.3/23508, intron 1 of 2)	TTC9
cluster_1	chr14_70708571_70709452	29.024882313707	1.12085147591111	0.558621611609314	1.20397280176123	29.5040524789685	1.88393558586329	0.622162725748573	0.860133358048109	0.999963191786573	Intron (ENST00000702053.1/103695436, intron 2 of 2)	LINC01269
cluster_1	chr14_71674844_71675925	21.0445765530694	5.37899100334384	3.21040707151655	4.97307391272453	23.780853059666	1.23078602200802	0.901836284994339	10.2807945357451	0.996790143420719	Intron (ENST00000381232.8/26037, intron 12 of 23)	SIPA1L1
cluster_1	chr14_72692630_72693296	14.8876386989084	8.79782865694785	1.38948800701601	2.42737550340752	14.8459560716232	4.16166318084994	1.83184189059164	10.4043048407227	0.984330031539767	Exon (ENST00000556509.6/8110, exon 7 of 11)	DPF3
cluster_1	chr14_73125030_73126113	8.96129603068118	0.688795580637038	1.10765611527933	1.81497807826928	9.0944981292945	2.70632840650662	1.71645074165855	2.78238889925282	0.999470474719176	Distal Intergenic	PSEN1
cluster_1	chr14_73728373_73729268	9.62185664641776	7.04255855937262	4.59834255149827	3.18800500876519	11.0895800280705	8.07755825045624	7.96895914332509	3.66663150280135	0.965675401019083	Promoter (<=1kb)	MIDEAS
cluster_1	chr14_73740751_73741222	15.3191536868502	14.686467598739	2.86659764782418	3.31788513600861	17.7933759793781	8.05520995570634	3.217020019593	5.715607543049	0.9818462144833	Promoter (1-2kb)	MIDEAS
cluster_1	chr14_74347389_74349234	19.2546855940828	2.1736214933491	1.16669465451981	1.67693100937519	21.5197330806131	2.6440370758191	1.15229600795899	1.62560077214103	0.999979275540466	Promoter (<=1kb)	VRTN
cluster_1	chr14_74362087_74362932	21.7345464974051	7.45690285223007	3.83570702046344	6.65802721312016	26.1220596477891	6.20053894002196	6.39720282781606	3.96773350082706	0.999905483039458	Distal Intergenic	VRTN
cluster_1	chr14_74413956_74415408	10.8839300667237	5.36047093261505	1.76062762948417	2.44957109132892	9.40845026492231	6.16079714971623	3.65481236357672	3.02615749029262	0.998262725710644	Intron (ENST00000331628.8/646658, intron 1 of 3)	SYNDIG1L
cluster_1	chr14_74429056_74429771	35.3313680402189	1.2930264536008	1.14273330935843	1.58139171292008	40.7339584672952	2.52657652338553	1.87831084816052	2.50165795432515	0.999933810928441	Promoter (2-3kb)	SYNDIG1L
cluster_1	chr14_74508318_74508829	15.9343972199543	5.27882734906993	3.01794472709473	4.60875861211183	19.5556593092069	2.48951001224082	3.59065384870761	3.37272432870481	0.999735355978731	Promoter (<=1kb)	LTBP2
cluster_1	chr14_75279957_75280548	25.2162459928802	11.3312241339	9.27741446019991	8.49759220110913	19.4765777629826	8.48610262868822	5.53057518354014	5.31817037570614	0.997925690094449	Promoter (<=1kb)	FOS
cluster_1	chr14_75287798_75288549	13.4842047160828	8.27643894567829	3.03162866290576	2.23456987750751	11.0077341823183	6.41733845107077	3.69106971756578	3.26686236175652	0.996039620096791	Distal Intergenic	LINC01220
cluster_1	chr14_75419040_75419797	14.0936475718613	5.48345284883561	2.33322403730668	3.29953166422422	19.8895934156312	8.5195020740893	3.29201378273355	12.3372470073366	0.983196319065259	Distal Intergenic	JDP2-AS1
[truncated: 9,462 more rows]
