# Supplementary material for: Epigenetic insights into GABAergic development in Dravet Syndrome iPSC and therapeutic implications
Source: eLife. 2024 Aug 27;12:RP92599. doi: 10.7554/eLife.92599 (PMC11349296; doi:10.7554/eLife.92599)
Supplement: Supplementary file 6. — Source data for Figure 4 and Figure 4—figure supplement 1 [file elife-92599-supp6.xlsx]

## Sheet: Supplementary File 6
Group	Peak names	BaseMean	log2FoldChange	p Value	FDR	Annoation	Genes
d19_high_control_vs_experiment	chr1_113043258_113044206	29.839192069868	2.62121495267577	2.80120782543599e-05	0.0392318384148392	Intron (ENST00000627431.2/100506392, intron 5 of 5)	LRIG2-DT
d19_high_control_vs_experiment	chr10_113183382_113184167	19.6414298756006	3.20216219127788	3.66106490320392e-06	0.0163091411143895	Distal Intergenic	TCF7L2
d19_high_control_vs_experiment	chr12_42511565_42512137	16.1755334034505	3.23132348667423	1.85762806337183e-05	0.035763739865321	Intron (ENST00000345127.9/144165, intron 1 of 7)	PRICKLE1
d19_high_control_vs_experiment	chr12_51828866_51829606	42.0850573061582	2.71706979069633	4.51746137657692e-05	0.0456821578384156	Intron (ENST00000637934.1/ENST00000637934.1, intron 3 of 4)	TMDD1
d19_high_control_vs_experiment	chr12_62629346_62629821	19.5309123197843	2.77632999259894	7.30518823104728e-06	0.0246048843585612	Distal Intergenic	LINC01465
d19_high_control_vs_experiment	chr13_23449012_23449868	29.0180169348413	4.52823123104795	3.54286568004926e-08	0.00172795006857816	Distal Intergenic	SACS
d19_high_control_vs_experiment	chr13_29884582_29885431	41.2344269829819	2.45474080238276	5.62329019745193e-06	0.0205697143777693	Promoter (2-3kb)	LINC00297
d19_high_control_vs_experiment	chr14_36345213_36346442	20.8158123091613	3.40934652326537	1.19303862049253e-06	0.0116375349915484	Intron (ENST00000634305.1/ENST00000634305.1, intron 2 of 3)	MBIP
d19_high_control_vs_experiment	chr14_78709756_78710830	28.6832912600705	3.29398961870103	2.25669014629619e-05	0.0376189504527294	Promoter (<=1kb)	LOC105370589
d19_high_control_vs_experiment	chr14_96952955_96953853	20.7835338435008	3.25288571986569	3.03224502844695e-05	0.0392630113338319	Intron (ENST00000681101.1/7443, intron 16 of 16)	LINC00618
d19_high_control_vs_experiment	chr16_997248_998103	29.7574247328871	3.36708023508193	3.50878490490752e-05	0.0420818352226442	Promoter (<=1kb)	NA
d19_high_control_vs_experiment	chr17_9322119_9322842	27.6571714805226	2.22114472611577	1.80678186970834e-05	0.0352486279482646	Intron (ENST00000306357.9/9482, intron 7 of 7)	STX8
d19_high_control_vs_experiment	chr2_16869266_16870037	16.706123489494	3.35166572405086	4.95760930220795e-06	0.019575128641674	Distal Intergenic	LINC01866
d19_high_control_vs_experiment	chr2_201962715_201963914	48.2281195276723	4.14245688915605	1.91142664390933e-07	0.00699190309208814	Distal Intergenic	FZD7
d19_high_control_vs_experiment	chr2_64828214_64828909	17.2269874450226	3.52751606969868	2.54092470979804e-06	0.0148216178736853	Distal Intergenic	LINC01800
d19_high_control_vs_experiment	chr2_77008923_77009720	19.0363030380808	2.62089670945913	4.9610225629971e-05	0.0487172415686315	Exon (ENST00000445178.1/101927907, exon 4 of 4)	LRRTM4-AS1
d19_high_control_vs_experiment	chr2_96962331_96963131	18.0093801007981	3.47512019063776	2.23793026129889e-05	0.0376189504527294	Intron (ENST00000490605.3/51252, intron 5 of 16)	FAM178B
d19_high_control_vs_experiment	chr21_41477488_41478610	39.5175350087071	2.22183873659722	3.23456055851723e-05	0.0397709606555566	Intron (ENST00000679263.1/7113, intron 7 of 13)	TMPRSS2
d19_high_control_vs_experiment	chr3_11510050_11510760	16.7366028414479	2.7067325475376	1.19404430856015e-05	0.0281790605064361	3' UTR	VGLL4
d19_high_control_vs_experiment	chr3_157248462_157249154	24.470394743556	2.4499315205497	3.87503593103195e-05	0.0432458884244424	Intron (ENST00000668714.2/101928236, intron 2 of 2)	LOC105374179
d19_high_control_vs_experiment	chr3_182142813_182143587	23.8596034395456	2.73375588109092	2.32116596999189e-05	0.0376189504527294	Distal Intergenic	LOC105374243
d19_high_control_vs_experiment	chr3_185216315_185217190	23.9121817861749	2.86536796184293	2.83725033896957e-05	0.0392318384148392	Intron (ENST00000231887.8/1962, intron 5 of 6)	EHHADH
d19_high_control_vs_experiment	chr4_26772306_26773084	21.4720907998473	3.86039775064726	8.36505045603314e-06	0.0253831182462816	Distal Intergenic	STIM2
d19_high_control_vs_experiment	chr5_14341712_14342556	27.1817886356467	2.60841304548668	2.20729595302174e-05	0.0376189504527294	Intron (ENST00000698541.1/7204, intron 11 of 36)	TRIO
d19_high_control_vs_experiment	chr5_35087969_35088747	20.5234082060493	3.41969460380793	9.2006577650253e-06	0.0253831182462816	Promoter (<=1kb)	PRLR
d19_high_control_vs_experiment	chr5_89606822_89607534	18.3760732557883	3.5210348495292	1.15081168300211e-06	0.0116375349915484	Intron (ENST00000503691.1/105379076, intron 1 of 1)	LINC02161
d19_high_control_vs_experiment	chr6_104477359_104478185	22.3780688382558	3.5977723481055	1.63632210807521e-05	0.0351619810437924	Distal Intergenic	LOC105377918
d19_high_control_vs_experiment	chr6_105453153_105454445	29.6310703884614	3.32606808963066	2.52558542370572e-05	0.0381944082125299	Promoter (<=1kb)	PREP
d19_high_control_vs_experiment	chr7_140562705_140563524	24.4211128045171	3.17843950634897	7.92341413335178e-06	0.0252030023731253	Intron (ENST00000275884.10/27147, intron 8 of 18)	DENND2A
d19_high_control_vs_experiment	chr7_29288301_29289645	46.3560809585971	2.44920011274573	4.82481624129997e-05	0.0480243171969067	Promoter (<=1kb)	CHN2
d19_high_control_vs_experiment	chr7_94439846_94440705	18.0736527445179	2.339295889326	2.26794315779807e-05	0.0376189504527294	Distal Intergenic	COL1A2
d19_high_control_vs_experiment	chr8_67950440_67950950	16.422501735986	3.0262157729315	1.73095310826295e-05	0.0352350502814369	Promoter (1-2kb)	PREX2
d19_high_control_vs_experiment	chr8_9476958_9478160	23.521435077742	3.24054784051644	2.89577396410738e-05	0.0392318384148392	Distal Intergenic	LOC105379231
d19_high_control_vs_experiment	chr9_6787993_6789060	25.2721881882887	2.72388696850596	3.45361170906223e-06	0.0163091411143895	Intron (ENST00000536108.5/23081, intron 1 of 17)	KDM4C
d19_high_control_vs_experiment	chrX_138651535_138652201	19.2811512862578	4.20527205474338	2.83632431049624e-06	0.0148216178736853	Intron (ENST00000315930.11/2258, intron 3 of 4)	MIR504
d19_high_control_vs_experiment	chrX_23832269_23833276	25.2792580167916	3.9529714922563	8.84658320750656e-06	0.0253831182462816	Distal Intergenic	APOO
d19_low_control_vs_experiment	seqnames		none
d19_low_control_vs_experiment	chr1_211591976_211592711	16.7037945383533	-2.92879978041319	2.99219018506475e-05	0.0392630113338319	Distal Intergenic	SLC30A1
d19_low_control_vs_experiment	chr10_1761881_1762952	22.4372140529829	-3.22460846212305	2.17037685935402e-05	0.0376189504527294	Distal Intergenic	ADARB2
d19_low_control_vs_experiment	chr10_7132988_7133719	21.1675058873503	-3.92157307671803	2.79157887981586e-05	0.0392318384148392	Distal Intergenic	LOC107984203
d19_low_control_vs_experiment	chr12_48768055_48768983	20.1227950731275	-3.05260695946419	4.32399314729628e-05	0.044870782221709	3' UTR	MIR4701
d19_low_control_vs_experiment	chr14_54818225_54819186	41.6161740895594	-2.030467772641	3.99977746046387e-05	0.0433510695155669	Distal Intergenic	SAMD4A
d19_low_control_vs_experiment	chr15_48283201_48284113	30.8139816669017	-3.96780225442741	1.15624402875754e-06	0.0116375349915484	Intron (ENST00000647232.1/6557, intron 21 of 27)	DUT
d19_low_control_vs_experiment	chr16_84526591_84527600	56.1915841095071	-2.703736337133	9.36557815595516e-06	0.0253831182462816	Intron (ENST00000565079.5/57707, intron 1 of 3)	MEAK7
d19_low_control_vs_experiment	chr2_20614297_20615200	75.8083217429884	-2.34553286830339	3.65237097152975e-05	0.0424133028422452	3' UTR	HS1BP3
d19_low_control_vs_experiment	chr2_219680460_219681558	39.1990833238871	-4.32181414278134	1.45389271363518e-06	0.0118906078604436	Distal Intergenic	LINC02832
d19_low_control_vs_experiment	chr3_149332693_149334124	43.3144394942578	-2.77418316572821	3.55339128427645e-05	0.0422703338156717	Promoter (<=1kb)	TM4SF18
d19_low_control_vs_experiment	chr5_76168801_76169939	39.2358277040594	-3.71779381842802	2.23908995126921e-05	0.0376189504527294	Intron (ENST00000502798.7/22987, intron 2 of 12)	SV2C-AS1
d19_low_control_vs_experiment	chr7_128920446_128921608	30.6914491476505	-2.76872271097113	1.54404481573305e-06	0.0118906078604436	Distal Intergenic	KCP
d35_high_control_vs_experiment	seqnames		none
d35_high_control_vs_experiment	chr1_100538767_100540286	79.2936963439285	1.3900816818978	0.000231738331843212	0.0173832658354945	Promoter (<=1kb)	GPR88
d35_high_control_vs_experiment	chr1_100785530_100786141	16.0577310041776	3.27023310829897	0.000319311502623876	0.0200838918962068	Distal Intergenic	VCAM1
d35_high_control_vs_experiment	chr1_109083384_109084419	46.0623943279653	3.78997947352049	4.37107628519916e-06	0.00311319880568007	Distal Intergenic	TMEM167B
d35_high_control_vs_experiment	chr1_109257654_109258031	16.1951374125998	2.66703047585277	4.54934086359312e-05	0.00855919481000795	Intron (ENST00000271332.4/1952, intron 1 of 33)	CELSR2
d35_high_control_vs_experiment	chr1_110136731_110137603	37.1012177256899	1.96901185883881	2.50992043441706e-05	0.00662575175793753	Distal Intergenic	SLC6A17
d35_high_control_vs_experiment	chr1_110255278_110255870	18.612332217139	2.3900288176094	0.000813693259706218	0.0317118088707233	Intron (ENST00000412512.2/3749, intron 1 of 2)	KCNC4
d35_high_control_vs_experiment	chr1_110494718_110495335	21.7450455221653	2.76397161261122	9.74089734361633e-05	0.0119632385063654	Distal Intergenic	CYMP-AS1
d35_high_control_vs_experiment	chr1_110581615_110582934	28.9211192755083	3.20375099702774	1.79921817313165e-07	0.000712210274866845	Intron (ENST00000640680.1/3737, intron 2 of 8)	KCNA2
d35_high_control_vs_experiment	chr1_111748522_111749199	18.6392670775115	2.57814521554594	0.000445145691616968	0.0235852549168588	Intron (ENST00000444059.2/55924, intron 1 of 1)	DDX20
d35_high_control_vs_experiment	chr1_111908950_111909473	21.6204491466874	4.06324709899429	3.67152775242683e-06	0.00289096525740721	Promoter (<=1kb)	KCND3-AS1
d35_high_control_vs_experiment	chr1_113043258_113044206	29.839192069868	2.10530889889069	0.00180424893435011	0.0468353861260888	Intron (ENST00000627431.2/100506392, intron 5 of 5)	LRIG2-DT
d35_high_control_vs_experiment	chr1_113615597_113616650	19.4745036397564	3.0029825522379	0.00169811858812684	0.045502616178283	Intron (ENST00000307546.14/260425, intron 7 of 20)	PHTF1
d35_high_control_vs_experiment	chr1_115654598_115655330	16.3783878319904	3.28210794383978	0.000128380458165965	0.0135525227344092	Intron (ENST00000355485.7/81839, intron 2 of 7)	VANGL1
d35_high_control_vs_experiment	chr1_116151189_116152696	68.8587641585624	1.23317528276087	0.00138367266707723	0.0412784679751714	Distal Intergenic	LINC01779
d35_high_control_vs_experiment	chr1_151799067_151799806	18.5409225339754	3.26404699460362	3.60741260836598e-05	0.00785187240195595	Distal Intergenic	LINGO4
d35_high_control_vs_experiment	chr1_154727246_154727870	16.8291025770219	2.82169210301301	0.00125898030697989	0.0395767910177233	Intron (ENST00000271915.9/3782, intron 4 of 7)	ADAR
d35_high_control_vs_experiment	chr1_156247896_156248462	22.9232923902088	1.98847394447964	0.00200088469213733	0.0490439739257574	Promoter (<=1kb)	PAQR6
d35_high_control_vs_experiment	chr1_156401637_156402353	23.7774687237751	2.81169874597013	0.000207801320548091	0.0164669127629899	Distal Intergenic	MIR9-1HG
d35_high_control_vs_experiment	chr1_158077322_158077926	17.4959137085132	1.82393074222121	0.00122825667283075	0.0391098674736884	Intron (ENST00000360089.8/55243, intron 2 of 12)	KIRREL1
d35_high_control_vs_experiment	chr1_160024331_160024980	16.4872150543058	3.88054737072983	3.29010128309369e-06	0.00276304176190536	3' UTR	PIGM
d35_high_control_vs_experiment	chr1_160061853_160062739	57.7794608437912	3.00864366071812	3.77824045811518e-05	0.00798095681429114	Exon (ENST00000435580.2/ENST00000435580.2, exon 1 of 5)	KCNJ10
d35_high_control_vs_experiment	chr1_160081178_160081674	20.4088710513159	2.37305333539103	0.00178683348298428	0.046624846958794	Promoter (<=1kb)	KCNJ9
d35_high_control_vs_experiment	chr1_164651280_164651867	17.1468939165972	2.18806115333121	0.000424300280354859	0.022984843115079	Intron (ENST00000420696.7/5087, intron 2 of 8)	PBX1
d35_high_control_vs_experiment	chr1_164836426_164837431	35.7318365392838	3.98978051562137	4.59090392602719e-05	0.00856786060175289	Intron (ENST00000420696.7/5087, intron 8 of 8)	PBX1
d35_high_control_vs_experiment	chr1_164895406_164896007	16.4019187417498	2.14005587394335	0.00114698028495997	0.0377451425868229	Intron (ENST00000558796.2/ENST00000558796.2, intron 2 of 2)	LOC107985451
d35_high_control_vs_experiment	chr1_165933451_165934182	19.0260292674949	2.54469413762676	1.27549665808826e-05	0.00510820490434146	Distal Intergenic	MIR3658
d35_high_control_vs_experiment	chr1_166065700_166066516	18.8852862438195	2.7564963001575	0.000903465642674968	0.0334104483973222	Intron (ENST00000435676.2/149297, intron 2 of 2)	FAM78B-AS1
d35_high_control_vs_experiment	chr1_167430130_167431951	58.9907235328857	1.50155127123489	0.000306625241227567	0.0197371537363847	3' UTR	CD247
d35_high_control_vs_experiment	chr1_168342462_168343090	24.9994788994167	1.94385777235757	0.000515748559964079	0.0252543138475648	Intron (ENST00000636624.1/ENST00000636624.1, intron 1 of 3)	MIR557
d35_high_control_vs_experiment	chr1_169309018_169309969	23.5092887573206	3.75938601134993	0.000104694261116594	0.0123158040118824	Promoter (<=1kb)	NME7
d35_high_control_vs_experiment	chr1_170094371_170095250	16.894151607515	3.40507616678157	3.64628586437848e-05	0.00786515419309398	Distal Intergenic	KIFAP3
d35_high_control_vs_experiment	chr1_171741163_171742875	191.646053412533	1.12462876113628	0.000274477861731635	0.0188721045207215	Promoter (<=1kb)	VAMP4
d35_high_control_vs_experiment	chr1_171840823_171842741	187.273035185393	1.01235196438555	0.000767645084687427	0.0308619386769702	Promoter (<=1kb)	DNM3
d35_high_control_vs_experiment	chr1_171909276_171910599	42.4283599326259	3.07571644593103	0.000223269756302136	0.0170649759432301	Intron (ENST00000688173.1/26052, intron 1 of 14)	DNM3-IT1
d35_high_control_vs_experiment	chr1_173476653_173478371	247.682157221188	1.18690116424707	0.00162662110159372	0.0444746848121273	Promoter (<=1kb)	TNFSF4
d35_high_control_vs_experiment	chr1_174799229_174800140	139.54613639256	1.80989240613777	0.000338719684746868	0.0207320995967316	Promoter (<=1kb)	RABGAP1L
d35_high_control_vs_experiment	chr1_175865119_175865895	32.9219813385955	3.42973558785466	2.35236500444412e-05	0.00650035421494599	Distal Intergenic	LINC01657
d35_high_control_vs_experiment	chr1_178266480_178267166	43.4379593074355	2.16353820959613	0.00172078184789838	0.0457956596085866	Intron (ENST00000367649.8/9462, intron 1 of 17)	RASAL2
d35_high_control_vs_experiment	chr1_179175150_179175963	19.8968496617138	2.83059507320563	0.00134751937299876	0.0407659186448055	Intron (ENST00000502732.6/27, intron 1 of 11)	ABL2
d35_high_control_vs_experiment	chr1_180182418_180183266	21.5439355884785	2.87758554100308	0.000251808698489141	0.0181028898136681	Intron (ENST00000367602.8/5768, intron 6 of 11)	QSOX1
d35_high_control_vs_experiment	chr1_180424751_180425547	37.4220098396695	2.77571743583922	0.00111129735842671	0.037148271159772	Intron (ENST00000642319.1/84320, intron 4 of 13)	ACBD6
d35_high_control_vs_experiment	chr1_182662146_182662984	28.4424338798087	2.03215508014637	0.000777060695580587	0.0310421602612681	Intron (ENST00000258302.8/85397, intron 4 of 5)	RGS8
d35_high_control_vs_experiment	chr1_183368595_183369118	17.1609471965447	2.7390784243117	0.00148291750787855	0.0425963296799433	Intron (ENST00000287713.7/23057, intron 1 of 10)	NMNAT2
d35_high_control_vs_experiment	chr1_184385882_184387791	311.503791378132	1.28150742740656	0.00186553048984433	0.047628374810776	Promoter (<=1kb)	C1orf21-DT
d35_high_control_vs_experiment	chr1_184669237_184670031	19.4033599632988	3.09728523505892	0.000269786521225044	0.0186978602135338	Promoter (<=1kb)	LOC107985236
d35_high_control_vs_experiment	chr1_184881941_184882825	19.5722617498884	1.83000266515131	0.00204141078091365	0.0495168532927742	Intron (ENST00000367511.4/116496, intron 5 of 13)	NIBAN1
d35_high_control_vs_experiment	chr1_187261567_187262156	21.5311387719107	2.85429697175148	0.0010835204018521	0.0366627607385089	Promoter (<=1kb)	LINC01037
d35_high_control_vs_experiment	chr1_187264981_187265442	20.6729690094826	1.82332694582762	0.00205394445561364	0.0497003235102224	Intron (ENST00000643891.1/106144535, intron 2 of 8)	LINC01037
d35_high_control_vs_experiment	chr1_197435198_197435688	17.0879322496063	2.53625043347546	0.000574179925576342	0.0265643760129675	Exon (ENST00000535699.5/23418, exon 10 of 13)	CRB1
d35_high_control_vs_experiment	chr1_197911133_197912002	36.7186529363541	1.58733256425665	0.000464147378499829	0.0240679388316616	Promoter (<=1kb)	LHX9
d35_high_control_vs_experiment	chr1_197915818_197916456	43.5574383484249	1.64390603308396	0.000128304052896495	0.0135525227344092	Promoter (<=1kb)	LHX9
d35_high_control_vs_experiment	chr1_198298354_198299109	24.8668272058278	2.37121677217902	0.00102370147627513	0.0357478687542591	Intron (ENST00000538004.5/140609, intron 9 of 9)	NEK7
d35_high_control_vs_experiment	chr1_198876262_198877084	39.2642718796642	1.90514041450938	0.000861788970372192	0.0327081723517035	Intron (ENST00000660348.1/100131234, intron 2 of 2)	MIR181A1
d35_high_control_vs_experiment	chr1_198932276_198932631	16.3584486342605	2.75934525413134	0.00069829290917935	0.0294613756868891	Intron (ENST00000660348.1/100131234, intron 1 of 2)	MIR181A1HG
d35_high_control_vs_experiment	chr1_200048037_200048814	37.4478890202149	2.00632577204942	0.00104351556091341	0.0359809155788535	Exon (ENST00000236914.7/2494, exon 4 of 7)	NR5A2
d35_high_control_vs_experiment	chr1_200129123_200129997	18.5752366311101	2.51901460941655	6.95137697605558e-05	0.0102956143522998	Intron (ENST00000236914.7/2494, intron 6 of 6)	NR5A2
d35_high_control_vs_experiment	chr1_201582409_201583571	32.6043441944858	1.49594718437696	0.00067932107399895	0.0289863520479908	Intron (ENST00000648727.1/ENST00000648727.1, intron 1 of 1)	NAV1
d35_high_control_vs_experiment	chr1_201678602_201679420	29.5559139516392	2.68901864989878	2.18682326642155e-05	0.00639430990823205	Intron (ENST00000685211.1/89796, intron 5 of 33)	NAV1
d35_high_control_vs_experiment	chr1_202130222_202130879	28.8806409172711	2.28236952705222	0.000728949613285333	0.0300876855071713	3' UTR	GPR37L1
d35_high_control_vs_experiment	chr1_207990817_207991771	18.9514850319225	2.74019148933294	0.00078972583975945	0.031256126698257	Distal Intergenic	LINC02767
d35_high_control_vs_experiment	chr1_208787839_208788923	16.5798608851143	2.82188506985708	0.00204020995350082	0.0495168532927742	Distal Intergenic	LINC01717
d35_high_control_vs_experiment	chr1_209875487_209876189	27.8304282930279	2.46804009848637	1.72863037007346e-05	0.00580182917404396	Distal Intergenic	SYT14
d35_high_control_vs_experiment	chr1_212671413_212672048	24.8290889211531	2.95955788948733	2.77705331974011e-05	0.00680014357829437	Distal Intergenic	LINC02773
d35_high_control_vs_experiment	chr1_213325929_213327700	49.730712683319	2.84163850430002	0.000179909022754419	0.0153290990522611	Distal Intergenic	RPS6KC1
d35_high_control_vs_experiment	chr1_215081717_215084004	101.959630087386	1.28206579728084	0.000625719815411917	0.0277138943944796	Promoter (<=1kb)	KCNK2
d35_high_control_vs_experiment	chr1_216630426_216630995	23.9748396829679	4.31055105587265	6.51403856040115e-07	0.00134140115971548	Intron (ENST00000616180.4/2104, intron 3 of 6)	ESRRG
d35_high_control_vs_experiment	chr1_216682688_216683317	19.4158887590622	2.38500937630479	0.000603078250360638	0.0271349111001086	Intron (ENST00000616180.4/2104, intron 1 of 6)	ESRRG
d35_high_control_vs_experiment	chr1_216805924_216806682	25.2031817223021	4.2389231593261	1.1674230336925e-05	0.00494942214595509	Promoter (<=1kb)	ESRRG
d35_high_control_vs_experiment	chr1_217919788_217920566	16.3792174877727	2.61384114208368	0.000912951897128628	0.0335993731813308	Exon (ENST00000431637.2/100885798, exon 4 of 4)	LINC00210
d35_high_control_vs_experiment	chr1_218079071_218079880	16.1791492303255	3.29389604282985	1.99430400252594e-05	0.006182275338099	Distal Intergenic	LOC105372922
d35_high_control_vs_experiment	chr1_219660566_219662103	76.3456226714615	2.02032880420112	0.000167073214517964	0.0148491063513413	Distal Intergenic	ZC3H11B
d35_high_control_vs_experiment	chr1_224684788_224685485	17.4866935559974	2.43907716872717	0.000221888166750474	0.0169833699932612	Exon (ENST00000498382.5/149111, exon 3 of 6)	CNIH3-AS1
d35_high_control_vs_experiment	chr1_224697875_224698693	25.4724213630429	3.14517057892311	0.000587356650901568	0.0267436987942817	Intron (ENST00000498382.5/149111, intron 3 of 5)	CNIH3-AS1
d35_high_control_vs_experiment	chr1_229410540_229411439	51.4795296241423	1.65427889543815	0.00167295998367688	0.0450856417257488	Exon (ENST00000693297.1/ENST00000693297.1, exon 2 of 2)	ACTA1
d35_high_control_vs_experiment	chr1_231923646_231924744	63.7472599812145	2.69453777653172	0.00184264749740486	0.0474064667204152	Promoter (1-2kb)	DISC1-IT1
d35_high_control_vs_experiment	chr1_232507604_232508893	35.2872793478043	3.08848167169528	7.66304101938866e-06	0.00405536332341814	Intron (ENST00000366630.5/57568, intron 2 of 21)	SIPA1L2
d35_high_control_vs_experiment	chr1_234230270_234230890	21.5446888780989	2.00088118768661	0.00188957485105696	0.0479169386863397	Intron (ENST00000366618.8/148641, intron 2 of 7)	SLC35F3
d35_high_control_vs_experiment	chr1_234700142_234700815	22.2887132799586	2.23919209827241	8.18845295468251e-05	0.0111243872934364	Distal Intergenic	LINC01132
d35_high_control_vs_experiment	chr1_236535527_236536246	17.8927040827654	3.36333915063754	6.58742871446011e-05	0.0100431564046776	Exon (ENST00000608547.2/ENST00000608547.2, exon 1 of 1)	LGALS8
d35_high_control_vs_experiment	chr1_239867810_239868533	18.5695927027555	2.46413114879333	0.000573740216029657	0.0265622106481854	Intron (ENST00000468573.5/1131, intron 8 of 8)	CHRM3-AS1
d35_high_control_vs_experiment	chr1_241356169_241357622	144.873185961056	1.00555227670952	0.00081377466022468	0.0317118088707233	Promoter (<=1kb)	RGS7
d35_high_control_vs_experiment	chr1_241423682_241424831	69.4943816526494	1.1437448025255	0.000924801721427874	0.0337921290164427	Promoter (<=1kb)	NA
d35_high_control_vs_experiment	chr1_242224473_242225476	31.983331367926	2.41086927121427	0.00102094733220067	0.0357432338391947	Intron (ENST00000536534.7/200150, intron 4 of 9)	PLD5
d35_high_control_vs_experiment	chr1_244053685_244054350	36.0418473451584	2.60923268365068	0.000447916961656271	0.0236610791202641	Promoter (1-2kb)	ZBTB18
d35_high_control_vs_experiment	chr1_245234376_245235363	72.9089029714396	1.94966765050262	0.000170127271003224	0.0149263631067864	Promoter (<=1kb)	KIF26B-AS1
d35_high_control_vs_experiment	chr1_246647024_246647732	27.2849594369907	2.35487662500818	0.000141630467412383	0.0141184350223915	Exon (ENST00000483271.1/163882, exon 8 of 8)	LOC102724382
d35_high_control_vs_experiment	chr1_47696548_47697470	37.6646857087163	3.70552202357005	5.43136658616401e-05	0.00931781512089379	Intron (ENST00000454285.2/107984953, intron 2 of 2)	LINC01738
d35_high_control_vs_experiment	chr1_47776698_47777337	18.352636061552	2.91071710660662	1.65863187787244e-05	0.0057186659871829	Intron (ENST00000606738.3/388630, intron 5 of 6)	TRABD2B
d35_high_control_vs_experiment	chr1_53375468_53376581	24.959670333941	1.74268769096446	0.000628596278480924	0.0277596167927864	Distal Intergenic	LINC02812
d35_high_control_vs_experiment	chr1_53416931_53417709	18.2940511893795	2.9761864917186	0.000139287944833475	0.0139962969967194	Exon (ENST00000563752.5/163742, exon 2 of 3)	SLC25A3P1
d35_high_control_vs_experiment	chr1_58748532_58749321	17.7812197667119	2.88879616340735	1.00518147913805e-05	0.00456995315386302	Intron (ENST00000637377.1/112268263, intron 3 of 6)	LOC105378751
d35_high_control_vs_experiment	chr1_65791954_65793732	87.4813373932732	1.45874606400795	0.00058969091746602	0.0267972452140506	Promoter (<=1kb)	PDE4B
d35_high_control_vs_experiment	chr1_66532737_66534473	101.057063015089	1.90563976458916	1.99461402892268e-05	0.006182275338099	Promoter (<=1kb)	SGIP1
d35_high_control_vs_experiment	chr1_70442348_70443444	19.1908073830814	2.46030015417755	0.000789349083159294	0.0312545313819034	Distal Intergenic	CTH
d35_high_control_vs_experiment	chr1_72023087_72024037	21.4537453019385	3.09921624246507	5.73444208620822e-05	0.00954629021715671	Intron (ENST00000357731.10/257194, intron 1 of 6)	NEGR1
d35_high_control_vs_experiment	chr1_74343129_74343761	16.0555667438447	2.20565319311493	0.00149538451313706	0.04278377638011	3' UTR	FPGT-TNNI3K
d35_high_control_vs_experiment	chr1_74422504_74423302	35.337183532635	3.29245169224169	0.000649969071544963	0.0283371811716927	Intron (ENST00000557284.7/100526835, intron 19 of 26)	FPGT-TNNI3K
d35_high_control_vs_experiment	chr1_75074697_75075596	30.9090631289724	3.23320517468882	8.62155177009136e-05	0.0113787073734766	Distal Intergenic	LHX8
d35_high_control_vs_experiment	chr1_75130841_75131828	47.2042402095664	1.87285982732163	0.000590237856856509	0.0267987745173667	Promoter (2-3kb)	LHX8
d35_high_control_vs_experiment	chr1_75677690_75678592	24.1547639674964	2.98545305584108	0.000146002221958606	0.0142367938474051	Intron (ENST00000648424.1/204962, intron 2 of 2)	SLC44A5
d35_high_control_vs_experiment	chr1_76040291_76040952	18.5376724323307	2.03153733943403	0.00149336964570116	0.042776446644441	Distal Intergenic	LOC101927342
d35_high_control_vs_experiment	chr1_76293630_76294980	33.1105700703148	2.31461867948843	0.000764560934836541	0.0308047768773259	Intron (ENST00000328299.4/256435, intron 1 of 4)	ST6GALNAC3
d35_high_control_vs_experiment	chr1_77489734_77490607	27.99156328847	2.62392167934007	0.000664365919242044	0.0287067567720783	Intron (ENST00000354567.7/26289, intron 10 of 13)	AK5
d35_high_control_vs_experiment	chr1_81464077_81465091	42.677778915009	3.2080734273899	0.00040633491949321	0.0226146970650932	Intron (ENST00000674378.1/23266, intron 3 of 5)	ADGRL2
d35_high_control_vs_experiment	chr1_81478116_81478892	20.1740872641722	3.97232003093481	8.56726206130251e-06	0.00429580131340397	Intron (ENST00000674378.1/23266, intron 3 of 5)	ADGRL2
d35_high_control_vs_experiment	chr1_83998313_83999694	157.614713679345	1.04882340705083	0.00122651062499159	0.0390873881072421	Promoter (<=1kb)	TTLL7
d35_high_control_vs_experiment	chr1_84758956_84759743	22.1175976701607	3.92721215942778	1.28845819595412e-05	0.00511048755426919	Distal Intergenic	SSX2IP
d35_high_control_vs_experiment	chr1_84944662_84945406	47.2349926834857	1.2395584832974	0.00155130366270129	0.0435573707392069	Intron (ENST00000370608.8/255231, intron 7 of 13)	MCOLN2
d35_high_control_vs_experiment	chr1_88461964_88463386	59.6970400144131	1.51080464015198	0.000483078972396595	0.0245832249578599	Promoter (<=1kb)	LOC105378839
d35_high_control_vs_experiment	chr1_95308388_95309568	44.287792973653	2.63523803601343	2.37616432905752e-05	0.00650699782699435	Distal Intergenic	LINC01760
d35_high_control_vs_experiment	chr1_96095889_96097192	17.2677364226836	3.23827740300361	0.000924498928942948	0.0337892782624237	Distal Intergenic	LINC02790
d35_high_control_vs_experiment	chr1_97741883_97742793	17.6523682747584	2.74087610368201	0.00183427449779308	0.0472882001337082	Intron (ENST00000370192.8/1806, intron 3 of 22)	DPYD
d35_high_control_vs_experiment	chr1_99180262_99181261	44.2960106329898	1.80530733495602	0.00144023005963606	0.0421067400027485	Intron (ENST00000660510.1/100129620, intron 2 of 4)	PLPPR5
d35_high_control_vs_experiment	chr10_101566129_101566816	19.0686467796138	1.74799045174454	0.00183564281699499	0.0473077522615953	Distal Intergenic	DPCD
d35_high_control_vs_experiment	chr10_106513133_106514164	22.7536668556895	2.59689794680382	0.00164310526532136	0.0446412071226158	Distal Intergenic	SORCS1
d35_high_control_vs_experiment	chr10_112288358_112289016	35.0298921289692	3.01925788757494	0.00195048310423926	0.048594897077233	Intron (ENST00000643850.1/6975, intron 5 of 10)	TECTB
d35_high_control_vs_experiment	chr10_120005404_120006357	19.1637699017427	2.33800049261648	0.00161929619029476	0.0443708203395476	Distal Intergenic	MIR4682
d35_high_control_vs_experiment	chr10_129636408_129637477	21.1761953755644	3.49391929292629	0.000351951587004461	0.0211038620500007	Intron (ENST00000306010.8/4255, intron 2 of 4)	LOC105378560
d35_high_control_vs_experiment	chr10_131921234_131922364	28.5670709793246	2.2498985099875	0.00191886137114937	0.0482281952212054	Intron (ENST00000455566.6/55844, intron 2 of 8)	PPP2R2D
d35_high_control_vs_experiment	chr10_132158921_132159723	19.2796748691186	4.15116751065055	1.23483500366903e-05	0.0050179705862271	Promoter (2-3kb)	JAKMIP3
d35_high_control_vs_experiment	chr10_14670463_14671853	22.4143799888851	2.32408270621222	0.00109686106597918	0.0368860071529215	Intron (ENST00000181796.7/83641, intron 1 of 4)	LOC105376429
d35_high_control_vs_experiment	chr10_15879580_15880133	25.294844756315	2.24021339713103	0.00164063258840088	0.0446143440396819	Distal Intergenic	MINDY3
d35_high_control_vs_experiment	chr10_16867461_16868220	30.9927594222908	1.89946294628005	0.00151626140133868	0.0429991977502052	Promoter (<=1kb)	CUBN
d35_high_control_vs_experiment	chr10_18135782_18136814	50.5720083525366	4.01180717880966	2.26246815620446e-05	0.00641864404376149	Distal Intergenic	CACNB2
d35_high_control_vs_experiment	chr10_19561183_19561978	17.4183703438555	3.25827639676413	0.000373135617567121	0.0217409347716192	Intron (ENST00000454679.7/340895, intron 32 of 39)	MALRD1
d35_high_control_vs_experiment	chr10_24857097_24857852	27.4320684791227	3.90008499025865	1.06014090183441e-05	0.00473995084049042	Intron (ENST00000320152.11/56952, intron 5 of 8)	LINC01516
d35_high_control_vs_experiment	chr10_25757583_25758518	17.5135953169769	1.8437079675247	0.00096229361351342	0.0345808723168912	Distal Intergenic	LINC00836
d35_high_control_vs_experiment	chr10_25816250_25816970	18.3502600005883	3.4248380402633	0.000108316122606937	0.0124771043148565	Distal Intergenic	LINC00836
d35_high_control_vs_experiment	chr10_26314313_26315046	21.7553205817579	2.43649447923478	0.0012088009087318	0.0387732628864473	Distal Intergenic	NA
d35_high_control_vs_experiment	chr10_31803727_31804757	30.763723052768	2.77956074093141	0.000599297201395071	0.0270457375562036	Distal Intergenic	ARHGAP12
d35_high_control_vs_experiment	chr10_3330662_3331636	23.8993174564471	2.38487652510288	1.78254188600606e-05	0.00587632914504081	Distal Intergenic	LOC105376357
d35_high_control_vs_experiment	chr10_34918202_34919332	40.5919211741272	2.56340062848799	0.00198502823472667	0.0489374085620319	Distal Intergenic	LINC02635
d35_high_control_vs_experiment	chr10_35456127_35456674	16.8664783329509	3.16182203511317	0.000753235850274402	0.0305964941224873	Intron (ENST00000490012.6/219771, intron 7 of 9)	CCNY
d35_high_control_vs_experiment	chr10_35639043_35639385	23.9535794854627	2.96839666931378	1.42695626962883e-05	0.00531337499641346	Promoter (1-2kb)	LOC105376494
d35_high_control_vs_experiment	chr10_35940288_35941134	22.6796835077585	1.63559447767053	0.00127209460367614	0.039709995829915	Distal Intergenic	LINC02630
d35_high_control_vs_experiment	chr10_361280_362081	24.0168815782139	1.6660593010646	0.00152329365245583	0.043112915841878	Intron (ENST00000381496.7/22982, intron 21 of 35)	DIP2C
d35_high_control_vs_experiment	chr10_45470609_45471415	17.2408000302016	2.53991534556128	0.00106078671140224	0.03629209895849	Intron (ENST00000453424.7/220972, intron 3 of 7)	MARCHF8
d35_high_control_vs_experiment	chr10_45726758_45727797	59.2909689385014	1.27291493500192	0.00121759156276548	0.038910385134507	Promoter (<=1kb)	WASHC2C
d35_high_control_vs_experiment	chr10_46299497_46300239	20.6231467459409	1.88790362480321	0.000101379941324826	0.0121326030389379	Promoter (2-3kb)	ANTXRL
d35_high_control_vs_experiment	chr10_46555403_46557753	193.249513449253	1.04065428154107	0.00131993404818675	0.0404241683764796	Promoter (<=1kb)	GPRIN2
d35_high_control_vs_experiment	chr10_48655995_48656962	56.6084140026057	1.22778243060447	0.00182648745358078	0.0471804649906094	Promoter (<=1kb)	ARHGAP22
d35_high_control_vs_experiment	chr10_48671057_48672493	33.0782412375682	1.53372226578092	0.00019825327438646	0.016080720768536	Exon (ENST00000440750.1/ENST00000440750.1, exon 1 of 2)	WDFY4
d35_high_control_vs_experiment	chr10_49001334_49002668	29.5010135377257	2.26407307041328	0.000354811746206587	0.0211965046927844	Intron (ENST00000422966.1/ENST00000422966.1, intron 1 of 1)	LOC105378298
d35_high_control_vs_experiment	chr10_59708786_59710515	151.972981218828	1.12206952547944	0.000692679550949677	0.029306798056997	Promoter (<=1kb)	SLC16A9
d35_high_control_vs_experiment	chr10_59847001_59848171	47.7156191639207	2.61288251181815	0.000674115756361777	0.0289270646040902	Intron (ENST00000263102.7/8030, intron 2 of 8)	CCDC6
d35_high_control_vs_experiment	chr10_62804170_62806077	264.522166843357	1.12598049818143	0.0010565481012559	0.0362496646361166	Promoter (<=1kb)	ADO
d35_high_control_vs_experiment	chr10_66940903_66941913	18.8683662983298	3.00974940021084	0.000418849966782573	0.0228561186517933	Intron (ENST00000361320.5/347731, intron 2 of 2)	LRRTM3
d35_high_control_vs_experiment	chr10_71136246_71136907	18.2694907602351	2.87663845050408	3.77962347155566e-05	0.00798095681429114	Distal Intergenic	UNC5B
d35_high_control_vs_experiment	chr10_82880796_82881654	24.6601984677357	2.77571855419745	0.00199662245913958	0.0490345275025221	Intron (ENST00000372141.7/10718, intron 4 of 8)	NRG3
d35_high_control_vs_experiment	chr10_84179014_84179807	21.9875930214646	2.8673092064524	9.3502837870172e-05	0.011762187533752	Promoter (2-3kb)	GPR15LG
d35_high_control_vs_experiment	chr10_85507592_85508427	16.4213399919091	4.12907790070088	3.25446109042963e-05	0.00746911241860814	Distal Intergenic	LINC01520
d35_high_control_vs_experiment	chr10_86244103_86245220	45.3278726845567	2.49120081964478	0.00183996615787412	0.0473536916080171	Intron (ENST00000327946.12/2894, intron 2 of 15)	MIR346
d35_high_control_vs_experiment	chr10_86333788_86334553	19.0852500675244	4.30517035218523	5.8377518558528e-06	0.00355739604180413	Intron (ENST00000327946.12/2894, intron 2 of 15)	GRID1
d35_high_control_vs_experiment	chr10_89250887_89252292	217.262466067332	1.40474779401501	0.00140581510364544	0.041642711775433	Promoter (<=1kb)	LIPA
d35_high_control_vs_experiment	chr10_89342443_89343173	26.2106133174393	3.7687336454922	9.21118522269698e-09	0.000124552813112774	Promoter (<=1kb)	LOC101926887
d35_high_control_vs_experiment	chr10_89374227_89374832	16.0585153757475	2.10038009139814	0.000901728189771624	0.0333872635781821	Intron (ENST00000679438.1/3437, intron 3 of 3)	IFIT1B
d35_high_control_vs_experiment	chr10_90857016_90858436	84.5485001308487	1.08926812245721	0.00205616500766491	0.0497333877356762	Promoter (<=1kb)	HTR7
d35_high_control_vs_experiment	chr10_91381151_91382233	37.5497196344288	2.62889470074111	2.01366682432467e-05	0.00620684002920381	Intron (ENST00000688440.1/100188947, intron 2 of 3)	HECTD2
d35_high_control_vs_experiment	chr10_91591323_91592015	17.4847770715274	2.55967613127583	0.00122362801382921	0.0390369017781993	Distal Intergenic	HECTD2-AS1
d35_high_control_vs_experiment	chr10_92842915_92843510	18.1794941997624	1.72969562203849	0.000355324247911274	0.0211965046927844	Intron (ENST00000671701.1/54536, intron 2 of 22)	EXOC6
d35_high_control_vs_experiment	chr10_93849503_93850672	27.3176587554499	2.28391669681213	0.00156569877644874	0.0437600585364928	Distal Intergenic	SLC35G1
d35_high_control_vs_experiment	chr10_95476282_95477348	36.4346775538222	2.72340650091759	0.00017826127317036	0.015260322260441	Intron (ENST00000371227.8/10580, intron 2 of 31)	SORBS1
d35_high_control_vs_experiment	chr10_97089264_97089849	16.6670191471776	3.38442105258661	2.95143720502619e-08	0.000287674384760685	Intron (ENST00000266058.9/6585, intron 4 of 36)	NA
d35_high_control_vs_experiment	chr10_98267783_98268648	38.0208675160478	1.74844490280575	9.06121254931495e-05	0.0115827106843178	Promoter (<=1kb)	LOXL4
d35_high_control_vs_experiment	chr10_98321007_98321679	18.7096029663707	2.5570148027185	1.45879185626059e-05	0.00536168424920229	Distal Intergenic	LOXL4
d35_high_control_vs_experiment	chr11_102287894_102288364	17.9052943246457	2.112398743961	9.08118809541843e-05	0.0115983823317228	Distal Intergenic	BIRC3
d35_high_control_vs_experiment	chr11_103325707_103326778	39.7154243647709	1.50418166169323	0.00127219916791532	0.039709995829915	Intron (ENST00000375735.7/79659, intron 82 of 88)	DYNC2H1
d35_high_control_vs_experiment	chr11_103536981_103537758	42.5581238831932	3.57846392743092	6.87794176447367e-06	0.00385793505874815	Distal Intergenic	DYNC2H1
d35_high_control_vs_experiment	chr11_103768615_103769544	23.1975071454454	2.82495226243769	0.00196305761126171	0.0487030768597605	Intron (ENST00000533459.1/105369464, intron 2 of 4)	MIR4693
d35_high_control_vs_experiment	chr11_103998889_103999733	24.6872469594554	3.47119801966872	0.000184785530141437	0.0155097067663381	Intron (ENST00000393158.7/80310, intron 2 of 6)	DDI1
d35_high_control_vs_experiment	chr11_110077707_110078315	19.5652775581175	3.9927603678851	1.90202247846066e-07	0.000714803822686498	Intron (ENST00000692099.1/107984384, intron 1 of 2)	NA
d35_high_control_vs_experiment	chr11_110129360_110129808	19.144907227283	3.18765782598683	0.000503163094462509	0.0249723413199065	Promoter (1-2kb)	ZC3H12C
d35_high_control_vs_experiment	chr11_110505617_110506291	17.9274144713239	3.52955095524636	1.03935695638382e-06	0.00171693774141096	Distal Intergenic	FDX1
d35_high_control_vs_experiment	chr11_112477575_112478220	18.3132066861373	3.87018373761246	4.31473719495413e-05	0.00847418231198277	Intron (ENST00000528496.1/101928823, intron 2 of 2)	LINC02763
d35_high_control_vs_experiment	chr11_113147156_113147802	34.669741729056	2.65055165668444	0.00161251504344942	0.0443588362370763	Intron (ENST00000621518.4/4684, intron 2 of 19)	NCAM1
d35_high_control_vs_experiment	chr11_115645162_115646438	42.5299320427849	2.15850122601077	0.00172301739178465	0.0458186077162618	Exon (ENST00000564619.1/ENST00000564619.1, exon 1 of 1)	LINC02698
d35_high_control_vs_experiment	chr11_121967179_121967938	24.4210426303269	3.41291704109966	0.000155438346135394	0.0145042019756692	Distal Intergenic	MIR100HG
d35_high_control_vs_experiment	chr11_122812674_122813832	57.9265153388789	2.66344114770355	0.00125053359086826	0.0395043541210406	3' UTR	UBASH3B
d35_high_control_vs_experiment	chr11_124724922_124725959	19.857626981408	2.19911001684196	0.000821266892071231	0.0319092648101855	Distal Intergenic	NRGN
d35_high_control_vs_experiment	chr11_126082235_126083155	80.6525392774792	2.71622002133628	0.00173035787460083	0.0459568988514786	Distal Intergenic	CDON
d35_high_control_vs_experiment	chr11_131518300_131518985	17.1992747764474	3.68755152277497	6.6972111771979e-05	0.0101246878935582	Intron (ENST00000374791.7/50863, intron 1 of 7)	LOC101929653
d35_high_control_vs_experiment	chr11_131597514_131598710	18.5362193365528	2.39016469669399	0.000744407430246118	0.0304663890421311	Intron (ENST00000374791.7/50863, intron 1 of 7)	NTM
d35_high_control_vs_experiment	chr11_133934507_133935310	25.8015528774637	2.44513094736907	0.00203953508028946	0.0495168532927742	Promoter (2-3kb)	IGSF9B
d35_high_control_vs_experiment	chr11_133966101_133966730	18.831683204973	2.34763702550785	0.00169911176321973	0.045510099938613	Distal Intergenic	IGSF9B
d35_high_control_vs_experiment	chr11_14417214_14418058	19.4281137452732	2.55229971394143	0.00173307078822409	0.0459658042018646	Distal Intergenic	COPB1
d35_high_control_vs_experiment	chr11_15300012_15300992	18.0563286389163	2.75186749910547	0.00205314158577395	0.0497002429760819	Distal Intergenic	INSC
d35_high_control_vs_experiment	chr11_15565683_15566538	22.8177199896676	2.69709018801341	5.75339207831661e-05	0.00955874255505098	Intron (ENST00000527770.1/105376569, intron 3 of 4)	LINC02751
d35_high_control_vs_experiment	chr11_15870611_15871393	22.6437476495733	3.03414025505901	0.000101510135299629	0.0121326030389379	Intron (ENST00000659436.1/ENST00000659436.1, intron 2 of 2)	LINC02682
d35_high_control_vs_experiment	chr11_19359231_19360224	26.8244855523434	3.20055031740566	0.000687982913033258	0.0291968823104392	Intron (ENST00000360655.8/89797, intron 1 of 37)	NAV2
d35_high_control_vs_experiment	chr11_20609774_20610621	51.1735463111204	1.46019132832005	0.00198877479954658	0.0489614834021467	Intron (ENST00000298923.11/9152, intron 4 of 14)	SLC6A5
d35_high_control_vs_experiment	chr11_22340622_22341412	30.5329303591997	2.15160262768546	0.000259362440683115	0.0183073861549315	Promoter (1-2kb)	SLC17A6
d35_high_control_vs_experiment	chr11_22343280_22344166	30.0979043603081	1.77640709094927	0.000439607500284808	0.023478603815044	Promoter (<=1kb)	SLC17A6
d35_high_control_vs_experiment	chr11_22349370_22350123	29.5619436924712	2.80849546229263	0.000974811838455452	0.0348238093193479	Intron (ENST00000263160.4/57084, intron 3 of 11)	SLC17A6
d35_high_control_vs_experiment	chr11_24513599_24514752	39.632366117971	2.93828894221419	0.000259369414508579	0.0183073861549315	Intron (ENST00000531187.5/338645, intron 1 of 5)	LUZP2
d35_high_control_vs_experiment	chr11_26964770_26965830	16.2718446114603	2.75244905411965	0.00195589744535166	0.0486248079445589	Distal Intergenic	FIBIN
d35_high_control_vs_experiment	chr11_27233643_27234624	23.4884845334405	2.89177737242842	0.000214184804696612	0.0166998603558185	Distal Intergenic	BBOX1-AS1
d35_high_control_vs_experiment	chr11_27443624_27444476	66.3878602524491	1.90562484140001	0.000826492353081467	0.0320130025707219	Intron (ENST00000389858.4/55366, intron 1 of 16)	LGR4-AS1
d35_high_control_vs_experiment	chr11_30579073_30580010	42.3998717586319	3.7428483449032	1.77326143162412e-05	0.00586091162321244	Intron (ENST00000448418.6/744, intron 2 of 6)	MPPED2-AS1
d35_high_control_vs_experiment	chr11_31160938_31161848	28.8574104390617	2.92119206185848	2.54211486832004e-06	0.00256174979816075	Intron (ENST00000684477.1/341019, intron 9 of 38)	DCDC1
d35_high_control_vs_experiment	chr11_33930315_33931370	28.7175917869892	1.90483664214243	0.000643965712878307	0.0281981199500237	Distal Intergenic	LMO2
d35_high_control_vs_experiment	chr11_34299370_34300971	90.9028338121307	2.84563439581538	0.0002433839144698	0.0177691534447172	Intron (ENST00000435224.3/25841, intron 1 of 16)	ABTB2
d35_high_control_vs_experiment	chr11_40280204_40281588	57.3743917635545	2.19566697276451	0.000335345545895924	0.020626358096074	Intron (ENST00000278198.2/57689, intron 1 of 1)	LRRC4C
d35_high_control_vs_experiment	chr11_43576796_43577429	41.159643757968	1.46870725721461	0.00206290520490222	0.0498127803963325	Promoter (<=1kb)	HSD17B12
d35_high_control_vs_experiment	chr11_45041556_45042102	18.3700787999387	2.52390400614203	0.00171687510894955	0.0457337873325804	Exon (ENST00000654627.1/105376650, exon 2 of 3)	LOC105376650
d35_high_control_vs_experiment	chr11_45048874_45049797	26.101508270681	2.45994747579247	0.00010221828485644	0.0121855382006696	Distal Intergenic	LOC105376650
d35_high_control_vs_experiment	chr11_60946767_60947348	18.3691792642162	3.01049614857923	0.000757309093947406	0.0306853071556992	Promoter (<=1kb)	SLC15A3
d35_high_control_vs_experiment	chr11_61618706_61619418	20.834731567278	2.22150925106609	0.00193387859696573	0.0484410114191832	Intron (ENST00000496593.5/113157, intron 1 of 4)	RPLP0P2
d35_high_control_vs_experiment	chr11_75634706_75635459	28.9412931131742	2.37716985759541	0.000594320762746736	0.026916609920866	Intron (ENST00000304771.8/4135, intron 1 of 3)	MAP6
d35_high_control_vs_experiment	chr11_79253083_79253713	18.9807516658939	2.97878153755794	0.00190462376772856	0.0481035900342398	Intron (ENST00000278550.12/26011, intron 2 of 33)	TENM4
d35_high_control_vs_experiment	chr11_79269558_79270333	21.4019546473577	2.86782166521353	6.34161716361884e-06	0.00376205116417684	Promoter (<=1kb)	TENM4
d35_high_control_vs_experiment	chr11_8038315_8038981	28.0094793641438	2.32570925856705	0.000678476579149282	0.0289863520479908	Promoter (<=1kb)	TUB
d35_high_control_vs_experiment	chr11_8054984_8055953	19.7244852949617	2.41262950037642	0.00082869664502841	0.0320405923775452	Intron (ENST00000534099.5/7275, intron 1 of 11)	TUB-AS1
d35_high_control_vs_experiment	chr11_8071955_8072749	29.0188284167298	1.60167131062638	0.00183882778029457	0.0473467463373235	Intron (ENST00000534099.5/7275, intron 1 of 11)	TUB
d35_high_control_vs_experiment	chr11_83463975_83464824	16.8727748223658	2.25045688652622	0.000334826936235362	0.0206252203927579	Promoter (1-2kb)	DLG2
d35_high_control_vs_experiment	chr11_8356851_8357460	21.7963104589784	1.95011285410345	0.000778835028809306	0.0310952313607074	Distal Intergenic	LMO1
d35_high_control_vs_experiment	chr11_87352641_87353326	33.253806342957	1.67783141980224	0.00010582584031227	0.0123607377194577	Distal Intergenic	TMEM135
d35_high_control_vs_experiment	chr11_9066290_9067339	29.687543006137	2.14301461706652	0.000575707349999869	0.0265874591942254	Promoter (<=1kb)	SCUBE2
d35_high_control_vs_experiment	chr11_90835610_90836578	23.0065920015998	3.3612156711546	5.12000126146334e-05	0.00899476773420057	Intron (ENST00000649150.1/101929222, intron 4 of 7)	MIR1261
d35_high_control_vs_experiment	chr11_92391361_92392053	19.6718239239537	2.23339086168237	0.00151170903633131	0.0429588397068558	Intron (ENST00000525166.6/120114, intron 2 of 27)	FAT3
d35_high_control_vs_experiment	chr11_92784095_92785036	46.2283911863611	4.44658028273718	7.49754831770235e-07	0.00142538028319078	Intron (ENST00000525166.6/120114, intron 7 of 27)	FAT3
d35_high_control_vs_experiment	chr11_93329936_93331116	46.9545874505908	1.35318539567601	0.00091077444863328	0.0335711308628286	Promoter (<=1kb)	DEUP1
d35_high_control_vs_experiment	chr11_95255408_95256252	25.6405836979702	3.0060269487708	0.000242647133328508	0.0177573692654601	Distal Intergenic	LOC100129203
d35_high_control_vs_experiment	chr11_96152551_96153088	17.4508070177077	2.87257068708624	0.000636677020510528	0.0280013086917042	Intron (ENST00000524717.6/84441, intron 1 of 4)	MAML2
d35_high_control_vs_experiment	chr11_96178263_96179246	35.349828936342	2.49833996577796	0.000512581520059888	0.0251727595566817	Intron (ENST00000524717.6/84441, intron 1 of 4)	MAML2
d35_high_control_vs_experiment	chr12_100372835_100373587	27.9976931058158	3.01357035494368	0.00145595979429637	0.0423307311100395	Intron (ENST00000323346.10/246213, intron 1 of 11)	SLC17A8
d35_high_control_vs_experiment	chr12_100375263_100375849	21.2809789521094	2.70425342419855	0.000470878396494344	0.0242496728170648	Intron (ENST00000323346.10/246213, intron 1 of 11)	SLC17A8
d35_high_control_vs_experiment	chr12_100447232_100448095	21.8603193022393	2.5510729357417	0.000218965100381767	0.016862668399021	Distal Intergenic	NR1H4
d35_high_control_vs_experiment	chr12_10153180_10154335	69.8570591970359	1.2195642554756	0.000820848853579301	0.0319012678165223	Distal Intergenic	OLR1
d35_high_control_vs_experiment	chr12_102405869_102406595	33.0435786533032	2.96099198124293	0.000567003677861766	0.0264048413489994	Intron (ENST00000635615.1/105369942, intron 4 of 5)	IGF1
d35_high_control_vs_experiment	chr12_104623833_104624537	22.7501424588251	2.64022648265512	0.000443998608788941	0.0235678286956912	Intron (ENST00000303694.6/50515, intron 2 of 2)	NA
d35_high_control_vs_experiment	chr12_10673793_10674652	36.3385887693722	2.05736894725195	9.75049289243532e-05	0.0119652477065742	Promoter (<=1kb)	STYK1
d35_high_control_vs_experiment	chr12_110649296_110649945	17.0780634063027	2.80386183080463	0.000474551007520203	0.0243553705037469	Promoter (2-3kb)	TCTN1
d35_high_control_vs_experiment	chr12_112182448_112184005	27.8953420379696	2.06590071952071	0.00136690616599355	0.041067594403236	Exon (ENST00000550722.5/283450, exon 62 of 76)	HECTD4
d35_high_control_vs_experiment	chr12_12086498_12087871	53.3643863297091	2.55478310199614	0.00109879159169023	0.0369273074046128	Exon (ENST00000589718.5/79370, exon 4 of 7)	BCL2L14
d35_high_control_vs_experiment	chr12_12915615_12916682	32.4219095090135	1.4019947250896	0.000786690417561532	0.0312543126419251	Promoter (<=1kb)	MIR614
d35_high_control_vs_experiment	chr12_131030569_131031217	23.2593211536189	2.60360224473623	0.000168409584087048	0.0148833901444334	Exon (ENST00000535370.2/ENST00000535370.2, exon 2 of 2)	ADGRD1
d35_high_control_vs_experiment	chr12_131834003_131834551	20.717928922629	2.69273796779519	1.98451377603914e-05	0.006182275338099	Intron (ENST00000535004.2/4326, intron 1 of 9)	MMP17
d35_high_control_vs_experiment	chr12_13980177_13982419	90.3087416140912	1.16761394372688	0.00101181489579099	0.0355550167545895	Promoter (<=1kb)	GRIN2B
d35_high_control_vs_experiment	chr12_14630030_14630702	27.0641549160904	1.34231203034637	0.00183601326044173	0.0473086550181527	Intron (ENST00000261170.5/2984, intron 19 of 26)	C12orf60
d35_high_control_vs_experiment	chr12_15771088_15771987	24.3399493931167	2.73173971511493	0.000542256217695649	0.0259207107464594	Intron (ENST00000281172.10/2059, intron 1 of 20)	EPS8
d35_high_control_vs_experiment	chr12_15838463_15839423	27.3924827866538	4.08035001438332	2.71746997155489e-05	0.00675143047070947	Intron (ENST00000646918.1/2059, intron 2 of 23)	LOC102724146
d35_high_control_vs_experiment	chr12_16608062_16609317	57.9536846148533	2.52974096119563	0.000413278140412801	0.0227683029053058	Promoter (<=1kb)	LMO3
d35_high_control_vs_experiment	chr12_19966988_19967959	72.3745425954417	3.44108203559467	0.000332957153343277	0.0205720444210144	Intron (ENST00000535764.1/ENST00000535764.1, intron 3 of 4)	LINC02398
d35_high_control_vs_experiment	chr12_20587871_20588720	48.3816722689961	4.19572135995452	4.05211257003794e-06	0.00298595010828898	Intron (ENST00000359062.4/5139, intron 2 of 15)	PDE3A
d35_high_control_vs_experiment	chr12_22321643_22322629	22.0010899075225	2.67501577698002	0.00166424477098112	0.0449340318622095	Intron (ENST00000396037.9/6489, intron 1 of 4)	ST8SIA1
d35_high_control_vs_experiment	chr12_22543349_22544992	263.30611108991	1.08438887850564	0.00139973221597542	0.0415593018697423	Promoter (<=1kb)	C2CD5-AS1
d35_high_control_vs_experiment	chr12_23555461_23556289	23.0398249876276	2.46048106986618	0.00125126519478643	0.039507758959519	Intron (ENST00000451604.7/6660, intron 11 of 14)	SOX5
d35_high_control_vs_experiment	chr12_23830105_23830793	23.6114860495339	2.8856132593744	0.00175681138262336	0.0462509056204651	Intron (ENST00000451604.7/6660, intron 3 of 14)	SOX5
d35_high_control_vs_experiment	chr12_24281206_24281939	22.1460781204906	4.10697410222887	3.58883561721552e-06	0.00286963677743576	Intron (ENST00000646273.1/6660, intron 3 of 16)	SOX5-AS1
d35_high_control_vs_experiment	chr12_26226438_26227387	44.5975004306893	1.52103690879078	0.00099872586076896	0.0353172112491399	Intron (ENST00000538142.5/8082, intron 2 of 2)	SSPN
d35_high_control_vs_experiment	chr12_29317500_29318213	26.0710741121443	1.59205505358603	0.00029811005314187	0.0195858633374663	Promoter (<=1kb)	LOC100506606
d35_high_control_vs_experiment	chr12_32270659_32271714	52.0041009399543	2.519898602849	0.000171738521230408	0.0149661409878035	Intron (ENST00000652176.1/636, intron 2 of 9)	BICD1
d35_high_control_vs_experiment	chr12_3304448_3305123	17.7313433077587	2.02957431548752	0.00198772109370912	0.0489602119304971	Intron (ENST00000662026.1/105369606, intron 2 of 2)	LINC02827
d35_high_control_vs_experiment	chr12_3579481_3580486	26.0802475402506	2.7896134467805	0.000541967487657808	0.0259207107464594	Intron (ENST00000452611.6/56341, intron 7 of 9)	PRMT8
d35_high_control_vs_experiment	chr12_40224415_40225483	54.0584845414749	1.30598909941916	0.00107570626308484	0.0365693242776027	Promoter (<=1kb)	LRRK2
d35_high_control_vs_experiment	chr12_40691964_40693872	148.247456565361	1.11293574106521	0.000250501397376178	0.0180520721766894	Promoter (<=1kb)	CNTN1
d35_high_control_vs_experiment	chr12_41335979_41336519	22.3713211085861	2.90041808194325	0.00150177722604149	0.0428505146482741	Intron (ENST00000402685.7/29951, intron 3 of 9)	LOC107984499
d35_high_control_vs_experiment	chr12_42446595_42447678	49.7915071065792	3.15123638893358	0.00102278654262677	0.0357478687542591	3' UTR	PRICKLE1
d35_high_control_vs_experiment	chr12_42569278_42570043	17.5974999131577	2.85586521796876	1.07602705327835e-05	0.00477149754525276	Intron (ENST00000345127.9/144165, intron 1 of 7)	PRICKLE1
d35_high_control_vs_experiment	chr12_42588875_42590215	84.4865487594761	1.37241290531044	0.000753285379992186	0.0305964941224873	Promoter (<=1kb)	PRICKLE1
d35_high_control_vs_experiment	chr12_45653040_45653768	20.1812040993088	3.38587121020222	0.000690381080495142	0.0292428931243234	Distal Intergenic	LOC105369744
d35_high_control_vs_experiment	chr12_47734470_47735274	27.2920698860374	1.90709502916207	0.000216686560133143	0.0167731241771446	3' UTR	RAPGEF3
d35_high_control_vs_experiment	chr12_48182953_48184376	153.915209639923	1.43198346726483	0.00185476523191535	0.0475149256113965	Promoter (<=1kb)	CCDC184
d35_high_control_vs_experiment	chr12_62656591_62657113	17.3216721084832	2.24108498954819	0.000281355824001234	0.0191289632531325	Intron (ENST00000228705.7/57460, intron 9 of 9)	LINC01465
d35_high_control_vs_experiment	chr12_62659309_62659988	36.343463106329	2.13711376374601	0.00146480567867329	0.0424353273552829	Intron (ENST00000228705.7/57460, intron 9 of 9)	LINC01465
d35_high_control_vs_experiment	chr12_62714983_62715803	44.3412642168871	3.12383841397554	2.82878123809341e-06	0.00265869193022838	Intron (ENST00000228705.7/57460, intron 6 of 9)	PPM1H
d35_high_control_vs_experiment	chr12_64082720_64084137	43.7549209253678	2.2214106275561	0.00131928575549231	0.0404160650487838	Intron (ENST00000631006.3/57522, intron 10 of 21)	SRGAP1
d35_high_control_vs_experiment	chr12_64824266_64826096	84.4586232748439	1.68314695546362	4.25980458615933e-05	0.00844795678646967	Promoter (<=1kb)	TBC1D30
d35_high_control_vs_experiment	chr12_67482890_67483749	28.4318421755216	1.96576282699384	0.000810450390899755	0.0316690811052783	Intron (ENST00000650195.1/105369812, intron 3 of 4)	LINC02408
d35_high_control_vs_experiment	chr12_67827436_67828422	35.0046999850724	2.63463038375668	0.000813158498100392	0.0317118088707233	Distal Intergenic	LINC02421
d35_high_control_vs_experiment	chr12_67891545_67892668	27.0669695703856	3.06500544902396	0.000426553967587628	0.023065767627108	Distal Intergenic	LINC01479
d35_high_control_vs_experiment	chr12_74018620_74019285	17.9640319932915	4.02087558994594	5.14253036083283e-05	0.00900991697543351	Intron (ENST00000663261.1/100507377, intron 8 of 11)	LINC02394
d35_high_control_vs_experiment	chr12_75116548_75117386	19.1986136992475	3.13368258392419	0.000636382303572121	0.0279965378356684	Intron (ENST00000548513.5/3747, intron 1 of 4)	KCNC2
d35_high_control_vs_experiment	chr12_76271941_76272728	22.4405244457484	2.23323597770869	0.000862356238159993	0.0327081723517035	Intron (ENST00000553247.2/105369848, intron 1 of 4)	LNCOG
d35_high_control_vs_experiment	chr12_78209711_78211172	36.1338437856721	3.42884568493207	4.16885555109125e-05	0.00840057923214198	3' UTR	NAV3
d35_high_control_vs_experiment	chr12_78229512_78230554	23.5003794508543	1.57575564898947	0.00182664431229235	0.0471804649906094	Distal Intergenic	NAV3
d35_high_control_vs_experiment	chr12_7847195_7848128	21.6867386696797	2.98652169162063	7.71707701575365e-07	0.00143067254894376	Intron (ENST00000340749.9/144195, intron 4 of 12)	SLC2A14
d35_high_control_vs_experiment	chr12_79522008_79523297	49.7853606785199	2.34074210913818	3.36791076971463e-05	0.00757885377169578	Distal Intergenic	PAWR
d35_high_control_vs_experiment	chr12_81757994_81759967	103.044475804312	1.85552395221609	6.40594878567753e-05	0.0099275696000719	Promoter (<=1kb)	PPFIA2
d35_high_control_vs_experiment	chr12_82698909_82699751	36.3371492123988	4.67560339804751	2.01247020427767e-07	0.00073786483770254	Intron (ENST00000551915.5/160335, intron 1 of 7)	TMTC2
d35_high_control_vs_experiment	chr12_87967605_87968642	18.377675259669	3.41954009807618	6.0324154864767e-06	0.00364185886748839	Distal Intergenic	C12orf50
d35_high_control_vs_experiment	chr12_89059721_89060641	29.2970023818238	2.24248975885389	0.000373027522500593	0.0217409347716192	Intron (ENST00000549278.2/728084, intron 2 of 6)	LINC02458
d35_high_control_vs_experiment	chr12_89098261_89099145	41.4766814597326	2.42529247451836	0.00126463872638568	0.0396222415442823	Intron (ENST00000549278.2/728084, intron 2 of 6)	LINC02458
d35_high_control_vs_experiment	chr12_90253617_90254192	26.1579650855772	3.34716903075347	0.000110362988608625	0.0125889249554807	Distal Intergenic	LINC02392
d35_high_control_vs_experiment	chr12_91578608_91579417	26.5049041260363	1.67866748578097	0.00200512204486893	0.0490752151408208	Intron (ENST00000685093.1/105369896, intron 1 of 9)	LOC105369896
d35_high_control_vs_experiment	chr12_91884202_91885426	39.9873131854485	3.49524310336348	5.53819176327663e-05	0.00938750076531875	Distal Intergenic	LINC02404
d35_high_control_vs_experiment	chr12_91910870_91911681	18.8115403500359	2.21528848585065	0.00132766804983309	0.0405118960662727	Distal Intergenic	LINC02404
d35_high_control_vs_experiment	chr12_93318497_93319542	57.0292861685562	2.86542086159855	0.000716427567771503	0.029849087616119	Intron (ENST00000548890.2/643339, intron 2 of 2)	LOC643339
d35_high_control_vs_experiment	chr12_95114750_95115453	16.788704841322	3.04437145624572	0.00172266839109048	0.0458174320401055	Promoter (1-2kb)	FGD6
d35_high_control_vs_experiment	chr12_98870300_98870969	24.6580843488774	3.55279422456112	6.46203795198223e-06	0.00377978931957871	Intron (ENST00000341752.11/56899, intron 1 of 9)	ANKS1B
d35_high_control_vs_experiment	chr12_98894310_98895698	96.2865414608008	2.17477515046624	1.07712394509634e-08	0.000124552813112774	Promoter (<=1kb)	ANKS1B
d35_high_control_vs_experiment	chr12_99154105_99155276	55.458948737559	2.09374111553611	0.00115087431441925	0.037831636730251	Promoter (<=1kb)	ANKS1B
d35_high_control_vs_experiment	chr13_100510117_100511089	55.6869155955396	3.19331168679854	0.00015759904650677	0.0145696795820646	Intron (ENST00000376279.7/5095, intron 21 of 22)	PCCA
d35_high_control_vs_experiment	chr13_100530662_100531367	24.1928452320145	2.38875365722485	0.00102684525155084	0.0358061963440918	Promoter (2-3kb)	GGACT
d35_high_control_vs_experiment	chr13_100636080_100636972	24.515657405428	2.92420627997251	0.0014027280762839	0.0415907491257154	Promoter (<=1kb)	TMTC4
d35_high_control_vs_experiment	chr13_106332355_106333111	23.0092480218199	3.59658860061946	3.666187318945e-05	0.00787313726743438	Intron (ENST00000669705.1/107984626, intron 1 of 2)	LOC107984626
d35_high_control_vs_experiment	chr13_107832440_107833098	16.1547419580721	2.75953335532441	0.00198593719903778	0.0489374085620319	Promoter (2-3kb)	NALF1-IT1
d35_high_control_vs_experiment	chr13_108326521_108327353	18.7627933176045	4.15239648051135	2.41590035798956e-05	0.0065484482515785	Distal Intergenic	LOC105370355
d35_high_control_vs_experiment	chr13_109275168_109276180	34.5325840049003	2.95116578384624	0.000161805411174071	0.0146880425330569	Intron (ENST00000649017.1/ENST00000649017.1, intron 1 of 1)	LINC00370
d35_high_control_vs_experiment	chr13_22880336_22881168	21.4906178160338	4.55880755962114	2.36500730880622e-07	0.00075142078755357	Promoter (2-3kb)	LOC105370109
d35_high_control_vs_experiment	chr13_23449012_23449868	29.0180169348413	3.30869496701704	2.19457779140349e-05	0.00639430990823205	Distal Intergenic	SACS
d35_high_control_vs_experiment	chr13_26498692_26499708	24.1698848856898	2.27816931558508	0.000334741876228815	0.0206252203927579	Distal Intergenic	WASF3
d35_high_control_vs_experiment	chr13_27006497_27007510	35.8328662664197	1.62873440705241	0.000247243230378523	0.0179335709528237	Distal Intergenic	USP12
d35_high_control_vs_experiment	chr13_30019682_30020373	17.2128453685167	2.00951620427277	0.00157245882197241	0.0438715427641059	Distal Intergenic	LINC00544
d35_high_control_vs_experiment	chr13_36130244_36131818	122.112032528426	1.0639024731427	0.0012488875995748	0.0394741439037179	Promoter (<=1kb)	DCLK1
d35_high_control_vs_experiment	chr13_36154569_36155420	34.7309568460541	2.05565480561242	1.22730401315941e-05	0.0050179705862271	Distal Intergenic	DCLK1
d35_high_control_vs_experiment	chr13_36611999_36612759	21.2205181586631	2.91736798881869	5.85533695049488e-05	0.00963409146519545	Distal Intergenic	SERTM1
d35_high_control_vs_experiment	chr13_41310860_41312075	133.939663052058	1.28953608824278	0.000374706649202451	0.0217853088060301	Promoter (<=1kb)	NAA16
d35_high_control_vs_experiment	chr13_44305882_44307191	92.8156658361542	1.84937608016857	0.00126966799395609	0.0396886756480451	Exon (ENST00000701044.1/ENST00000701044.1, exon 1 of 1)	SERP2
d35_high_control_vs_experiment	chr13_44697988_44698600	19.3964969678116	3.12306811747083	0.000125210128341675	0.013387064397555	Intron (ENST00000426509.1/106144541, intron 2 of 2)	LINC00407
d35_high_control_vs_experiment	chr13_46647979_46648626	33.5618245715799	2.4394053252185	0.000800713096809175	0.0315262431319642	Intron (ENST00000311191.10/23143, intron 1 of 18)	LRCH1
d35_high_control_vs_experiment	chr13_51000656_51001189	17.500611184301	2.64492669088497	0.00029606917176575	0.0195727049640451	Intron (ENST00000643529.1/79621, intron 5 of 5)	GUCY1B2
d35_high_control_vs_experiment	chr13_51066338_51067844	42.7836922505731	2.36904991882652	0.00125979204394764	0.0395920708453036	Promoter (<=1kb)	GUCY1B2
d35_high_control_vs_experiment	chr13_53143916_53145073	16.0055254762821	3.6386223944633	4.00972358070008e-05	0.00823444941623962	Intron (ENST00000660057.1/102723875, intron 3 of 5)	LINC01065
d35_high_control_vs_experiment	chr13_53198411_53199373	30.3949997884113	3.33035078893505	0.000129581247859378	0.0136231585716239	Exon (ENST00000625090.1/ENST00000625090.1, exon 2 of 2)	LINC01065
d35_high_control_vs_experiment	chr13_54373186_54374005	27.3764509016899	2.88489830409025	0.00168751606837671	0.0453373953391483	Distal Intergenic	MIR1297
d35_high_control_vs_experiment	chr13_60626429_60627504	42.3220660449267	3.33653771897329	0.000388236467507832	0.0221431173471771	Intron (ENST00000663355.1/101926930, intron 1 of 2)	LINC00378
d35_high_control_vs_experiment	chr13_61128692_61129484	22.3081901792966	2.95682361225831	0.00202582937134341	0.0493317890466814	Intron (ENST00000658247.1/101926930, intron 4 of 4)	MIR3169
d35_high_control_vs_experiment	chr13_66344668_66346421	95.4719712809896	2.84822651697858	0.000872631510145143	0.0328767748778368	Intron (ENST00000377865.7/5101, intron 4 of 4)	PCDH9
d35_high_control_vs_experiment	chr13_70107300_70108974	70.1941880126734	1.86109868876541	0.000377359488282579	0.0218421085081518	Promoter (<=1kb)	KLHL1
d35_high_control_vs_experiment	chr13_74575142_74576387	67.4809524249272	1.3154824067514	0.00128086608344747	0.0398069452127849	Distal Intergenic	LINC00347
d35_high_control_vs_experiment	chr13_75195562_75196710	57.3630504648609	1.99540238382683	0.00138387862830193	0.0412784679751714	Distal Intergenic	CTAGE11P
d35_high_control_vs_experiment	chr13_75217850_75218463	19.6816748023213	2.6732895835266	2.44403655239142e-05	0.00657244713306334	Distal Intergenic	CTAGE11P
d35_high_control_vs_experiment	chr13_75357611_75358310	19.0028001180024	1.74952394843863	0.00169995112233238	0.045510099938613	Intron (ENST00000648194.1/9882, intron 4 of 19)	TBC1D4
d35_high_control_vs_experiment	chr13_78020674_78021332	19.2758408530095	2.82845238327369	0.00162404993697018	0.044448297923182	Intron (ENST00000607862.5/100874222, intron 1 of 2)	LINC00446
d35_high_control_vs_experiment	chr13_80296655_80297645	26.5504320632439	2.19120107418335	0.00103586321694013	0.0359126072391038	Distal Intergenic	SPRY2
d35_high_control_vs_experiment	chr13_84139487_84140166	17.9178903963778	2.61794517078226	0.000303273375180491	0.0196590594076845	Promoter (<=1kb)	LINC00333
d35_high_control_vs_experiment	chr13_94143579_94144394	20.9782590187949	2.46040463858099	0.000555970956442734	0.0261836904152208	Intron (ENST00000377047.9/10082, intron 4 of 8)	GPC6-AS1
d35_high_control_vs_experiment	chr13_94169518_94170644	32.0136250071296	2.35434705931484	0.000437030899062637	0.0233795978297477	Intron (ENST00000377047.9/10082, intron 4 of 8)	GPC6-AS1
d35_high_control_vs_experiment	chr13_94722512_94723253	19.0320153423216	2.9084701289774	0.00205373563110075	0.0497003235102224	Intron (ENST00000665450.1/101927284, intron 1 of 3)	SOX21-AS1
d35_high_control_vs_experiment	chr14_104158824_104159785	30.7411582903299	1.72530365503663	0.00147446278287321	0.0425347568289032	Intron (ENST00000697132.1/26153, intron 4 of 14)	KIF26A
d35_high_control_vs_experiment	chr14_23024737_23026208	27.7206632003571	2.85459747804184	2.60424624581582e-06	0.00256174979816075	3' UTR	PSMB5
d35_high_control_vs_experiment	chr14_23481923_23483769	75.590571554827	2.18457879135136	0.000192625725741577	0.015869107894442	Intron (ENST00000556699.2/25983, intron 10 of 10)	NGDN
d35_high_control_vs_experiment	chr14_23544483_23545001	25.6932916661022	2.50737041048509	0.00138647200891603	0.0413004913779752	Intron (ENST00000556354.5/79178, intron 4 of 4)	ZFHX2
d35_high_control_vs_experiment	chr14_23578130_23579274	71.2476041143131	1.94725012343907	0.000629856863390171	0.0278071168837379	Promoter (<=1kb)	JPH4
d35_high_control_vs_experiment	chr14_26966761_26967469	30.6259333420018	2.68165132307021	0.00198450656067318	0.0489371635061018	Intron (ENST00000656336.1/102725045, intron 2 of 5)	MIR4307
d35_high_control_vs_experiment	chr14_30242859_30244142	25.1132233914839	3.69682603712181	9.66711922408411e-06	0.00453377482657643	Intron (ENST00000549360.1/ENST00000549360.1, intron 1 of 2)	PRKD1
d35_high_control_vs_experiment	chr14_30270267_30271146	65.5603147114548	1.91467974989879	1.00141123226762e-05	0.00456995315386302	Intron (ENST00000549360.1/ENST00000549360.1, intron 1 of 2)	PRKD1
d35_high_control_vs_experiment	chr14_31962711_31963459	40.5613475541165	3.33364413156511	0.000413316912579747	0.0227683029053058	Distal Intergenic	LINC02313
d35_high_control_vs_experiment	chr14_32809090_32809707	20.8077284471005	3.69619763325024	6.02200382891722e-05	0.00972349866360881	Intron (ENST00000280979.9/9472, intron 12 of 13)	AKAP6
d35_high_control_vs_experiment	chr14_36020027_36020809	31.6256419376803	2.7497077320386	0.00165323312952427	0.0447792642602516	Intron (ENST00000660969.2/ENST00000660969.2, intron 3 of 3)	LOC105370452
d35_high_control_vs_experiment	chr14_36345213_36346442	20.8158123091613	3.24417381670776	1.23390605972645e-05	0.0050179705862271	Intron (ENST00000634305.1/ENST00000634305.1, intron 2 of 3)	MBIP
d35_high_control_vs_experiment	chr14_50784924_50786114	33.3612899801011	1.97511225732734	1.51570963032658e-05	0.00546400599949265	Intron (ENST00000530997.7/51199, intron 5 of 30)	NIN
d35_high_control_vs_experiment	chr14_51093370_51094451	79.3390269846446	1.51108020665142	0.000100078808453423	0.0120451135954851	Promoter (<=1kb)	TRIM9
d35_high_control_vs_experiment	chr14_52124662_52125370	20.9240597473054	2.4602262067744	0.000412236299482122	0.0227683029053058	Intron (ENST00000555852.1/105370498, intron 1 of 2)	LINC02319
d35_high_control_vs_experiment	chr14_56125996_56126884	25.5443212044986	2.46889144866846	0.000859457031241213	0.032665948509712	Intron (ENST00000559044.5/57161, intron 1 of 4)	PELI2
d35_high_control_vs_experiment	chr14_60931044_60931767	17.8144279036707	2.11691710095319	0.000214819648458044	0.0167233369520743	Intron (ENST00000261245.9/4331, intron 7 of 7)	TRMT5
d35_high_control_vs_experiment	chr14_69852376_69853249	26.935857999982	2.94737233822562	0.00128809910040863	0.0399656341112336	Promoter (<=1kb)	SMOC1
d35_high_control_vs_experiment	chr14_76117696_76118488	20.5659218004287	2.42932663378061	0.000847501364820566	0.0324339721656445	Distal Intergenic	GPATCH2L
d35_high_control_vs_experiment	chr14_77882713_77883785	16.8751639964956	1.90099741399009	0.000457570679240577	0.02389308634061	Intron (ENST00000238561.10/57143, intron 4 of 10)	ADCK1
d35_high_control_vs_experiment	chr14_78307418_78308599	22.7786525165461	2.59044923811974	0.000886851971741727	0.0331317653674381	Intron (ENST00000634499.2/9369, intron 5 of 21)	NRXN3
d35_high_control_vs_experiment	chr14_78709756_78710830	28.6832912600705	2.89597366028326	0.000268575245299749	0.0186600997387124	Promoter (<=1kb)	LOC105370589
d35_high_control_vs_experiment	chr14_79568551_79569524	18.1046719770527	3.05360305289621	8.08283598056222e-05	0.0110761378193073	Intron (ENST00000634499.2/9369, intron 17 of 21)	LOC105370583
d35_high_control_vs_experiment	chr14_89296098_89296895	30.9679219181507	3.98751553743077	2.10441304430741e-05	0.0063169723754716	Intron (ENST00000345097.8/1112, intron 3 of 6)	LOC101928817
d35_high_control_vs_experiment	chr14_94867937_94869015	21.824966923081	2.23204329099772	0.000301601881024792	0.0195858633374663	Distal Intergenic	LINC02279
d35_high_control_vs_experiment	chr15_27025391_27026125	21.7661565987829	2.32645753042094	0.00207126908731953	0.0499496405945906	Intron (ENST00000615808.5/2567, intron 2 of 9)	GABRG3
d35_high_control_vs_experiment	chr15_27481722_27482739	26.8774120448247	3.19391437055211	7.8493736599794e-05	0.010976345073827	Intron (ENST00000615808.5/2567, intron 6 of 9)	GABRG3
d35_high_control_vs_experiment	chr15_34708268_34709033	23.3680384269614	2.04086610527764	0.00196004792716274	0.0486557414485626	Distal Intergenic	LINC02252
d35_high_control_vs_experiment	chr15_37077649_37078294	17.9079535124121	3.07686059769155	5.95873786238543e-05	0.00970473747738992	Intron (ENST00000561208.6/4212, intron 7 of 11)	MEIS2
d35_high_control_vs_experiment	chr15_45371968_45372858	20.7375470476128	4.0869979510425	3.14421194675091e-06	0.00275591225293767	Promoter (2-3kb)	GATM
d35_high_control_vs_experiment	chr15_63323842_63324670	41.1786044741899	3.41936318111491	5.06896480606443e-06	0.00328444885548118	3' UTR	CA12
d35_high_control_vs_experiment	chr15_63348225_63348856	21.9615928441263	1.96497525523225	0.00204921711278067	0.0496388231631554	Intron (ENST00000178638.8/771, intron 2 of 10)	CA12
d35_high_control_vs_experiment	chr15_74245256_74246055	47.8310697325173	1.7585742796978	0.000999533740061089	0.0353305231868373	Intron (ENST00000398814.8/80125, intron 2 of 18)	CCDC33
d35_high_control_vs_experiment	chr15_77738776_77739301	20.2447074307554	2.36470817004445	0.000164261553753243	0.0147418615331082	Intron (ENST00000561686.5/84894, intron 1 of 3)	LINGO1
d35_high_control_vs_experiment	chr15_89448838_89449383	17.9104818419776	2.22574901548807	0.00179845182409541	0.0467656582697011	Distal Intergenic	RHCG
d35_high_control_vs_experiment	chr15_92780688_92781427	47.9121714583757	2.98766370211743	0.000479539974819101	0.0244649082549195	Exon (ENST00000562894.1/ENST00000562894.1, exon 1 of 1)	LOC101926994
d35_high_control_vs_experiment	chr16_11084934_11085655	19.5216066478603	2.18117491487094	0.00163094138253158	0.0444956920742395	Intron (ENST00000703130.1/23274, intron 18 of 22)	CLEC16A
d35_high_control_vs_experiment	chr16_46857145_46858134	20.8301640993333	2.56191012848054	0.000566950396218054	0.0264048413489994	Distal Intergenic	C16orf87
d35_high_control_vs_experiment	chr16_47965096_47966195	58.6410186489307	2.08562264266318	0.00174795695682602	0.0461337571564272	Promoter (<=1kb)	LINC02134
d35_high_control_vs_experiment	chr16_51312366_51313570	50.1572008083247	3.29731150190554	0.000623775941404505	0.027693183222573	Exon (ENST00000642450.1/107984886, exon 4 of 4)	LOC105371256
d35_high_control_vs_experiment	chr16_51457825_51459110	58.1611778044228	2.75910943087943	0.00115798228363968	0.0379907653400557	Intron (ENST00000643262.1/102723323, intron 2 of 2)	LOC102723323
d35_high_control_vs_experiment	chr16_54511937_54513114	39.1313713277656	3.33267385332998	2.75805828482627e-05	0.00677459332788414	Distal Intergenic	LINC02183
d35_high_control_vs_experiment	chr16_58102668_58103413	24.9984035748012	2.28247597119884	0.00206675409681403	0.049872862388948	Distal Intergenic	CFAP20
d35_high_control_vs_experiment	chr16_79123815_79124850	35.3060505189314	2.73250001751469	0.000531881935033627	0.0257580625438551	Intron (ENST00000683929.1/51741, intron 10 of 10)	LOC107984806
d35_high_control_vs_experiment	chr16_79183821_79184601	19.3600983713516	2.95635718559561	0.000300878239830502	0.0195858633374663	Intron (ENST00000683929.1/51741, intron 10 of 10)	WWOX
d35_high_control_vs_experiment	chr16_990807_992274	47.4227545698122	2.56589399242046	0.000165761616292736	0.014796980385514	Exon (ENST00000599946.2/107984898, exon 6 of 8)	NA
d35_high_control_vs_experiment	chr17_17415948_17417001	22.9375074536156	1.94305454488317	0.000796362697002801	0.031437509331566	Distal Intergenic	MED9
d35_high_control_vs_experiment	chr17_18004478_18005354	21.6033570490557	2.66044306810619	1.42389564146621e-05	0.00531337499641346	Promoter (1-2kb)	DRC3
d35_high_control_vs_experiment	chr17_20189124_20190215	37.1518255767587	2.81898853767086	0.000196289761356711	0.01600544286908	Intron (ENST00000676570.1/92521, intron 3 of 7)	SPECC1
d35_high_control_vs_experiment	chr17_43418568_43419309	24.8249356776851	1.85326729455725	0.0011910794357446	0.0384739123477809	Distal Intergenic	ARL4D
d35_high_control_vs_experiment	chr17_72342030_72343088	45.3491185018163	2.48234962728717	0.000242283516096178	0.0177573692654601	Promoter (<=1kb)	LINC02003
d35_high_control_vs_experiment	chr17_9322119_9322842	27.6571714805226	1.72755965768379	0.00130043682215891	0.0401413070412809	Intron (ENST00000306357.9/9482, intron 7 of 7)	STX8
d35_high_control_vs_experiment	chr18_13453300_13454143	22.5037444317812	2.84825293393696	0.000424807205910872	0.0229957303667814	Promoter (<=1kb)	LDLRAD4
d35_high_control_vs_experiment	chr18_25175932_25176766	26.9479887988832	3.80328060428677	2.04181686830609e-05	0.00622588480178729	Intron (ENST00000361524.8/25925, intron 5 of 7)	ZNF521
d35_high_control_vs_experiment	chr18_27057412_27058233	27.3802683491892	2.02910839151303	0.000112346086525765	0.0126505059602889	Intron (ENST00000578701.5/107985143, intron 2 of 3)	CHST9
d35_high_control_vs_experiment	chr18_31722283_31722819	18.3267953479324	1.59436823389711	0.000625416045427628	0.0277138943944796	Distal Intergenic	B4GALT6
d35_high_control_vs_experiment	chr18_34222010_34223462	108.277135654668	1.41697068236382	9.28013485316134e-05	0.0117131508967379	Promoter (<=1kb)	NOL4
d35_high_control_vs_experiment	chr18_34281364_34282193	17.9735855198397	2.50033844980359	0.00071980087495198	0.0299071493994351	Distal Intergenic	NOL4
d35_high_control_vs_experiment	chr18_34493055_34494632	120.88025032262	1.0693662634501	0.000305508108262701	0.0197027404798329	Promoter (<=1kb)	DTNA
d35_high_control_vs_experiment	chr18_35122596_35123216	20.0011359272236	2.13158902812206	0.00044307300684095	0.0235453832157341	Intron (ENST00000591734.5/10982, intron 5 of 5)	MAPRE2
d35_high_control_vs_experiment	chr18_3525735_3527251	45.6638553997482	1.8552608280025	0.000908186990714889	0.0335108515903819	Intron (ENST00000400147.6/9229, intron 7 of 9)	GAPLINC
d35_high_control_vs_experiment	chr18_35827380_35828167	26.5931792027168	2.95614125395221	0.0012601195029949	0.0395920708453036	Distal Intergenic	MIR187
d35_high_control_vs_experiment	chr18_36493325_36494633	42.492582069055	2.75658813541855	6.48278529470469e-05	0.00997200206572263	Intron (ENST00000590592.6/80206, intron 3 of 28)	FHOD3
d35_high_control_vs_experiment	chr18_37332635_37333268	23.3574283653836	2.48326406074999	0.000188961554776875	0.0157253444339889	Intron (ENST00000420428.7/56853, intron 2 of 12)	LOC105372068
d35_high_control_vs_experiment	chr18_37498921_37499556	21.8599661291422	2.93276429073787	0.000102510780144562	0.0121914027098348	Intron (ENST00000420428.7/56853, intron 1 of 12)	CELF4
d35_high_control_vs_experiment	chr18_4119115_4120600	55.8086653802415	2.46809236809696	0.000192656723148889	0.015869107894442	Intron (ENST00000315677.8/9229, intron 2 of 12)	DLGAP1
d35_high_control_vs_experiment	chr18_41371550_41372483	17.1176434702458	2.68558750637058	0.000171298302178418	0.0149558445462096	Intron (ENST00000670702.1/105372083, intron 2 of 3)	LOC105372083
d35_high_control_vs_experiment	chr18_42365194_42366087	16.1477828498165	2.73579687543427	0.00190759967797006	0.04813023188836	Intron (ENST00000659948.1/284260, intron 3 of 3)	LINC00907
d35_high_control_vs_experiment	chr18_44723173_44724112	39.8063643798887	3.41412406964016	6.11127127469369e-05	0.00980444881929913	Intron (ENST00000426838.8/26040, intron 2 of 3)	SETBP1
d35_high_control_vs_experiment	chr18_45104006_45105151	40.6030808372862	2.97603741109206	0.000578762413495078	0.0266388425623538	Exon (ENST00000660208.1/101927961, exon 5 of 5)	LOC101927961
d35_high_control_vs_experiment	chr18_45237650_45238333	19.5064098181557	3.42036636078137	0.00014943304455017	0.014362865998724	Intron (ENST00000586448.5/8170, intron 1 of 20)	SLC14A2
d35_high_control_vs_experiment	chr18_48079857_48080983	30.1150467249808	1.99620884201302	6.98390874854838e-05	0.0103028074840582	Intron (ENST00000590800.6/201501, intron 3 of 4)	ZBTB7C
d35_high_control_vs_experiment	chr18_48314524_48315173	27.5730504696588	2.50943677474302	2.17585266009438e-05	0.00638837990485719	Intron (ENST00000590800.6/201501, intron 2 of 4)	ZBTB7C
d35_high_control_vs_experiment	chr18_49006522_49007399	34.1124236170768	1.94048170289821	0.000913044666194819	0.0335993731813308	Distal Intergenic	DYM-AS1
d35_high_control_vs_experiment	chr18_51016982_51017995	33.258580286453	1.78493297368918	0.00112510816091567	0.0373937396174327	Intron (ENST00000590722.2/4089, intron 2 of 8)	SMAD4
d35_high_control_vs_experiment	chr18_54127488_54128341	22.8087452727733	2.4081996887058	0.000102751243290722	0.0122017182926149	Distal Intergenic	MBD2
d35_high_control_vs_experiment	chr18_55351893_55352548	29.6226362232954	2.72378254737658	0.00034839619048466	0.0210579597168349	Promoter (<=1kb)	TCF4
d35_high_control_vs_experiment	chr18_55422512_55424107	52.2030579908923	2.16920940813252	0.00153436650976785	0.0433046240703233	Promoter (<=1kb)	TCF4
d35_high_control_vs_experiment	chr18_56043171_56044060	31.1392774557839	2.89787772501425	0.00190444080554014	0.0481035900342398	Promoter (<=1kb)	LINC01905
d35_high_control_vs_experiment	chr18_58101189_58102397	33.1518856734833	3.86309332246979	1.1259825976073e-05	0.0048505032523739	Intron (ENST00000400345.8/23327, intron 1 of 30)	NEDD4L
d35_high_control_vs_experiment	chr18_58392325_58392865	18.1070842292515	2.64889379145522	0.00111351361853811	0.0371898035801939	Promoter (1-2kb)	NEDD4L
d35_high_control_vs_experiment	chr18_58511684_58512772	53.748663856306	3.36184128269317	6.43309266184973e-05	0.00994980916984035	Exon (ENST00000610389.1/ENST00000610389.1, exon 1 of 1)	ALPK2
d35_high_control_vs_experiment	chr18_63936015_63937079	54.045952830994	1.13078474911136	0.00133585147788361	0.0406419496888996	3' UTR	HMSD
d35_high_control_vs_experiment	chr18_66682500_66683379	24.3669344700296	2.62284809247356	8.36556553024748e-05	0.011203680405443	Distal Intergenic	CDH19
d35_high_control_vs_experiment	chr18_67151113_67151851	17.0536107957722	2.34815323535822	0.000788708164656745	0.0312545313819034	Distal Intergenic	MIR5011
d35_high_control_vs_experiment	chr18_69878883_69879843	25.6802581868273	1.8985549187025	0.000810047423127927	0.0316690811052783	Intron (ENST00000578928.1/10666, intron 1 of 3)	CD226
d35_high_control_vs_experiment	chr18_70381452_70382348	23.9669095583114	3.52308469734782	0.000221203786767245	0.0169655404315235	Promoter (2-3kb)	LINC01910
d35_high_control_vs_experiment	chr18_74083086_74083712	16.4173443495371	2.77464336393568	0.000131996794373857	0.0137033274269682	Promoter (<=1kb)	FBXO15
d35_high_control_vs_experiment	chr18_74710576_74711422	16.68621009646	4.29461595277765	1.60568294202516e-06	0.0020305245475454	Intron (ENST00000582337.5/55628, intron 3 of 4)	ZNF407
d35_high_control_vs_experiment	chr18_75783546_75784880	36.0704130329791	3.34971455688215	1.83939342670782e-05	0.00594478377506109	Distal Intergenic	LINC01898
d35_high_control_vs_experiment	chr18_76260977_76261515	18.1163564224501	2.74512037499487	0.00186041385643771	0.0475785493312348	Promoter (1-2kb)	LOC105372209
d35_high_control_vs_experiment	chr18_76494582_76494869	20.4245364043537	1.5629618302722	0.00175944564062281	0.0462635413550154	Promoter (<=1kb)	ZNF516
d35_high_control_vs_experiment	chr18_8741070_8741944	28.5331911060087	2.91026395027276	0.00117738788070255	0.0382352199539018	Intron (ENST00000306329.16/23255, intron 3 of 14)	MTCL1
d35_high_control_vs_experiment	chr18_8844548_8845226	17.0923074640752	2.88002656470925	3.76988005325068e-05	0.00798095681429114	Distal Intergenic	MTCL1
d35_high_control_vs_experiment	chr18_8912465_8913138	18.6682539095061	2.26266095169718	0.000950336817863187	0.0343164501910362	Distal Intergenic	MTCL1
d35_high_control_vs_experiment	chr18_9737392_9738229	58.6425144981394	2.73078784034345	0.000525682888443075	0.0255725425497246	Intron (ENST00000578734.5/11031, intron 1 of 5)	RAB31
d35_high_control_vs_experiment	chr19_6241617_6242174	16.4634129561085	3.20563401513077	0.000336769422096252	0.0206885424506003	Intron (ENST00000252674.9/4298, intron 3 of 11)	MLLT1
d35_high_control_vs_experiment	chr2_1010101_1011052	39.3998392192179	2.16666243583377	0.00134648341887011	0.0407650889540898	Intron (ENST00000308624.10/54221, intron 1 of 16)	SNTG2-AS1
d35_high_control_vs_experiment	chr2_101479274_101480077	27.3634854454872	2.85953824606244	0.000491842993794972	0.0247467340300439	Promoter (<=1kb)	LINC01870
d35_high_control_vs_experiment	chr2_105143355_105144723	65.4113184890295	1.23025196300293	0.000487829023415738	0.0246633179431414	Promoter (<=1kb)	LINC01918
d35_high_control_vs_experiment	chr2_111534671_111535741	42.9172589805856	3.02699299718394	8.64791528092439e-06	0.00430462869074489	Intron (ENST00000630717.1/ENST00000630717.1, intron 1 of 1)	MIR4435-2HG
d35_high_control_vs_experiment	chr2_112749645_112750511	19.5282837586818	1.62101620625686	0.00137405034368999	0.0411883847402864	Intron (ENST00000302450.11/150468, intron 5 of 8)	CKAP2L
d35_high_control_vs_experiment	chr2_122516577_122517594	21.9414968943257	2.51305982383886	0.000518403409102314	0.0253262893965893	Intron (ENST00000657880.1/105373595, intron 3 of 8)	LOC105373593
d35_high_control_vs_experiment	chr2_12741238_12742061	18.1621708213661	3.14177284767688	0.000587272530772618	0.0267436987942817	3' UTR	MIR3125
d35_high_control_vs_experiment	chr2_127645393_127646311	40.876805214219	2.65140365986972	2.86011963279456e-05	0.00695707902588742	Promoter (<=1kb)	GPR17
d35_high_control_vs_experiment	chr2_134522608_134523626	41.0180485778743	2.62953851266124	0.00132027135504595	0.0404241683764796	Intron (ENST00000281924.6/81615, intron 4 of 7)	TMEM163
d35_high_control_vs_experiment	chr2_135960901_135961772	54.6363007520107	2.86990502454677	0.000149881416410378	0.0143773198175985	Exon (ENST00000264161.9/1615, exon 4 of 16)	DARS1
d35_high_control_vs_experiment	chr2_135962805_135963277	18.3694107121764	2.70259676864246	0.000649187396796135	0.0283155054490491	Intron (ENST00000264161.9/1615, intron 3 of 15)	DARS1
d35_high_control_vs_experiment	chr2_143346908_143347903	22.0017065480215	3.44505482828977	1.50797846381172e-06	0.00197119010932605	Intron (ENST00000552641.5/55843, intron 6 of 7)	ARHGAP15
d35_high_control_vs_experiment	chr2_144461281_144461877	26.5109795686407	3.41304825755475	8.27357262937768e-05	0.0111698789212734	3' UTR	ZEB2
d35_high_control_vs_experiment	chr2_145200046_145200911	34.160844210679	4.39809976689041	3.9398312679392e-06	0.0029618517816205	Intron (ENST00000627545.2/100505498, intron 2 of 2)	LOC100505498
d35_high_control_vs_experiment	chr2_145931590_145932486	40.7531106917536	3.1962706155858	0.00116897807739708	0.0381460060535687	Distal Intergenic	LOC105373666
d35_high_control_vs_experiment	chr2_148816998_148817831	20.0868372505712	2.90387353960142	7.26831975150666e-05	0.010582745717651	Distal Intergenic	KIF5C
d35_high_control_vs_experiment	chr2_148887437_148888733	52.1776916080278	2.04169944307796	0.000562263274991194	0.0263049603255164	Promoter (<=1kb)	KIF5C-AS1
d35_high_control_vs_experiment	chr2_150091695_150092529	17.5639840075967	2.83853766169002	0.00109421432025619	0.0368638060776679	Distal Intergenic	LOC105373682
d35_high_control_vs_experiment	chr2_150429335_150430189	21.7750022789449	2.95309698253122	0.000559090311376828	0.0262326559827167	Distal Intergenic	RND3
d35_high_control_vs_experiment	chr2_150529134_150529917	30.6879289855704	2.02167668604326	0.000250435946486967	0.0180520721766894	Intron (ENST00000439275.1/390, intron 1 of 4)	RND3
d35_high_control_vs_experiment	chr2_152025556_152026259	30.7371667236894	1.34894514090744	0.00193573603928558	0.0484424907664711	Intron (ENST00000539935.7/785, intron 2 of 13)	CACNB4
d35_high_control_vs_experiment	chr2_156157578_156158040	20.3034136577683	3.19632997428348	8.95047660086698e-05	0.0115536899775777	Intron (ENST00000635799.1/101929378, intron 1 of 4)	LINC01876
d35_high_control_vs_experiment	chr2_157485429_157486175	16.7447230503122	3.15805019569307	0.00144185248037064	0.0421067400027485	Promoter (2-3kb)	LOC105373712
d35_high_control_vs_experiment	chr2_157890826_157891855	34.6054086681366	4.26471913814228	1.02301575268052e-05	0.00461816345410509	Intron (ENST00000605860.5/151531, intron 1 of 9)	UPP2
d35_high_control_vs_experiment	chr2_160109938_160111360	27.5680900883762	1.80615204616319	0.000815813971311383	0.0317548511748793	Promoter (<=1kb)	ITGB6
d35_high_control_vs_experiment	chr2_161237341_161238330	65.2545157519743	1.47083549756404	0.000776244726583543	0.0310260538483571	Intron (ENST00000421122.7/101929512, intron 3 of 3)	TANK
d35_high_control_vs_experiment	chr2_162036667_162037455	19.4737965055278	3.84933731647196	2.53706012177885e-06	0.00256174979816075	Intron (ENST00000678668.1/1803, intron 7 of 24)	DPP4
d35_high_control_vs_experiment	chr2_162475475_162476263	42.9916285787432	3.66897104033575	0.00014270648817071	0.0141413004840224	Intron (ENST00000332142.10/90134, intron 6 of 15)	KCNH7
d35_high_control_vs_experiment	chr2_162838049_162839952	83.5867228507722	1.94616207313625	8.71026580081483e-05	0.0113924269912259	Promoter (<=1kb)	KCNH7
d35_high_control_vs_experiment	chr2_16320664_16321338	18.8318214772812	2.41909951430983	0.000215589007328162	0.0167398850860568	Intron (ENST00000420404.2/ENST00000420404.2, intron 3 of 3)	LOC107985855
d35_high_control_vs_experiment	chr2_163717535_163718561	44.405534587956	2.75968651695928	9.86015477983274e-05	0.0119824395091217	Intron (ENST00000409634.5/55137, intron 2 of 2)	FIGN
d35_high_control_vs_experiment	chr2_165203603_165204363	19.5671299524507	1.87295307951615	0.00158689999009001	0.0440781117905175	Promoter (<=1kb)	SCN3A
d35_high_control_vs_experiment	chr2_16632579_16633144	18.982693610518	3.25037773133348	0.000146670760398957	0.0142367938474051	Intron (ENST00000381323.7/81553, intron 1 of 11)	CYRIA
d35_high_control_vs_experiment	chr2_168139817_168140507	18.9957928898095	3.38729852436706	9.57081150250675e-05	0.0118427342681712	Exon (ENST00000355999.5/27347, exon 7 of 18)	STK39
d35_high_control_vs_experiment	chr2_168505495_168506504	30.1341003026199	3.17253078619584	0.00125878621661222	0.0395767910177233	Intron (ENST00000392687.4/253782, intron 1 of 10)	CERS6
d35_high_control_vs_experiment	chr2_16962457_16963173	25.8928018385142	3.45616527008554	5.7477411821627e-06	0.0035266497681984	Distal Intergenic	LINC01866
d35_high_control_vs_experiment	chr2_171723548_171724759	34.2539140547593	1.74000356589379	0.00188201980114688	0.0477977068098336	Promoter (1-2kb)	DYNC1I2
d35_high_control_vs_experiment	chr2_173249760_173251066	106.800272242819	2.60826315152991	0.00187075318822548	0.0477122937270153	Intron (ENST00000409176.6/51776, intron 16 of 19)	MAP3K20-AS1
d35_high_control_vs_experiment	chr2_177030328_177030948	21.8099807360405	3.51198816040318	1.65025648280476e-05	0.00570914360766515	Intron (ENST00000665720.1/107985965, intron 4 of 6)	LOC107985965
d35_high_control_vs_experiment	chr2_177625911_177626723	21.4446152698264	2.53599318114672	0.000198327998036692	0.016080720768536	3' UTR	TTC30A
d35_high_control_vs_experiment	chr2_178522884_178524097	78.6026285099163	1.4592969318373	0.000487934193001182	0.0246633179431414	Promoter (<=1kb)	TTN-AS1
d35_high_control_vs_experiment	chr2_179532777_179533483	23.9498109136796	2.58996540840573	0.000865119904098678	0.032749722886838	Intron (ENST00000466398.5/151126, intron 5 of 12)	ZNF385B
d35_high_control_vs_experiment	chr2_180979993_180981466	220.666978213818	1.34299136618818	0.000113677188350189	0.0127051056434701	Promoter (<=1kb)	UBE2E3
d35_high_control_vs_experiment	chr2_181680284_181681059	68.0316081556272	1.94802984621703	0.00144187292345335	0.0421067400027485	Promoter (<=1kb)	CERKL
d35_high_control_vs_experiment	chr2_182631213_182631802	19.6608277003975	3.33609990471286	0.000700024455239989	0.0294966968189651	Distal Intergenic	DNAJC10
d35_high_control_vs_experiment	chr2_182924154_182924707	17.6892831229132	3.2552222662365	0.000884198987571294	0.0330722102031985	Promoter (2-3kb)	NCKAP1
d35_high_control_vs_experiment	chr2_186848689_186849823	122.164968051321	1.46058802376237	0.000663345427448016	0.0286930262394105	Promoter (<=1kb)	ZSWIM2
d35_high_control_vs_experiment	chr2_189580274_189582008	117.157860316505	1.71078584293952	0.000398359690495195	0.0224621546571688	Promoter (<=1kb)	SLC40A1
d35_high_control_vs_experiment	chr2_197236854_197237971	22.9393391767134	3.6587821460573	0.00011504379873436	0.0127630694057141	Intron (ENST00000282272.15/91526, intron 1 of 27)	ANKRD44
d35_high_control_vs_experiment	chr2_197798017_197798624	16.7196725834647	2.52222096600706	0.00149583560571138	0.04278377638011	Distal Intergenic	PLCL1
d35_high_control_vs_experiment	chr2_198296613_198297383	23.3344095732895	1.83734024972572	7.6553027866203e-05	0.0108872600889186	Intron (ENST00000625084.1/ENST00000625084.1, intron 1 of 1)	LINC01923
d35_high_control_vs_experiment	chr2_201972326_201973551	80.8017595037245	2.22104626712614	0.000308092024582577	0.019783824688328	Distal Intergenic	FZD7
d35_high_control_vs_experiment	chr2_202122993_202123749	23.3385458352187	2.88953718082429	4.13629345326392e-05	0.00838423972828503	Intron (ENST00000498697.3/100652824, intron 11 of 23)	KIAA2012-AS1
d35_high_control_vs_experiment	chr2_203721316_203722398	18.2777395551235	2.44458663517852	0.000991214971767205	0.0351450939620985	Intron (ENST00000374481.7/940, intron 1 of 2)	CD28
d35_high_control_vs_experiment	chr2_204453707_204454368	39.1255910509834	2.08689577374938	0.000166207780427709	0.0148016496402816	Distal Intergenic	LOC105373845
d35_high_control_vs_experiment	chr2_206970710_206971462	16.4372688061944	3.32973646181861	4.22617490415529e-05	0.00842163732943877	Distal Intergenic	CPO
d35_high_control_vs_experiment	chr2_207227028_207227809	51.4603282723832	1.5120887425144	0.000718760789626887	0.0298887180361443	Exon (ENST00000454444.1/ENST00000454444.1, exon 1 of 2)	MYOSLID-AS1
d35_high_control_vs_experiment	chr2_209476273_209477316	53.156699156823	3.53137760109804	0.000155892139547821	0.0145195079786408	Intron (ENST00000682079.1/4133, intron 1 of 15)	MAP2
d35_high_control_vs_experiment	chr2_209519280_209520365	30.735890704161	2.57772310406493	0.000871566953262468	0.0328696192295987	Intron (ENST00000682079.1/4133, intron 2 of 15)	MAP2
d35_high_control_vs_experiment	chr2_212041546_212042315	28.6538002910794	3.69454024307776	9.34180473428726e-05	0.011762187533752	Intron (ENST00000402597.6/2066, intron 1 of 25)	ERBB4
d35_high_control_vs_experiment	chr2_215259934_215260788	16.3683283240171	2.9522340801067	0.0020406729743699	0.0495168532927742	Intron (ENST00000657931.1/ENST00000657931.1, intron 3 of 4)	ATIC
d35_high_control_vs_experiment	chr2_224466052_224466840	33.3587430884793	3.94981053192873	1.32161444541865e-05	0.00518725043100677	Intron (ENST00000620050.1/ENST00000620050.1, intron 1 of 1)	CUL3
d35_high_control_vs_experiment	chr2_225465574_225466254	16.153002925862	2.93951266128861	0.000276952620215018	0.0189585166820686	Intron (ENST00000636099.1/57624, intron 3 of 6)	NYAP2
d35_high_control_vs_experiment	chr2_227939411_227940123	17.5523001862384	2.31239440308658	0.000463038511015219	0.0240295114975309	Distal Intergenic	DAW1
d35_high_control_vs_experiment	chr2_231015341_231016242	31.8706881272573	1.95746088538564	0.00045041250281684	0.0237073737695873	Intron (ENST00000452881.5/130560, intron 6 of 8)	SPATA3
d35_high_control_vs_experiment	chr2_235054246_235054916	16.4080157146526	2.60160672902943	0.000566344930223705	0.0263986981816677	3' UTR	SH3BP4
d35_high_control_vs_experiment	chr2_23698564_23699200	16.702038548428	3.50939346869999	0.000349333645392023	0.0210604816289618	Intron (ENST00000486442.6/114818, intron 11 of 13)	KLHL29
d35_high_control_vs_experiment	chr2_28413428_28414297	22.2368953078962	2.04828614203536	0.00047408710577589	0.024339871644727	3' UTR	FOSL2
d35_high_control_vs_experiment	chr2_2876476_2877929	29.5263318269912	3.00901345095059	8.82197766087893e-06	0.00432298812466778	Distal Intergenic	LOC105373390
d35_high_control_vs_experiment	chr2_30679248_30680184	26.0262926891028	2.13474860385684	0.00128893478384506	0.0399750611474126	Exon (ENST00000623248.1/ENST00000623248.1, exon 1 of 1)	CAPN13
d35_high_control_vs_experiment	chr2_32882643_32883803	39.3301774202306	3.88464320115187	2.64843119940647e-05	0.00671114066111333	Promoter (<=1kb)	LINC00486
d35_high_control_vs_experiment	chr2_36493313_36493868	17.3143764661549	3.35200307197611	0.000300453015115439	0.0195858633374663	Intron (ENST00000280527.7/51232, intron 7 of 16)	CRIM1
d35_high_control_vs_experiment	chr2_36675593_36676534	16.2287312520381	3.44795039593867	0.000145305998301664	0.0142367938474051	Distal Intergenic	VIT
d35_high_control_vs_experiment	chr2_39364463_39365567	38.7492188094617	2.17834124783943	0.00109340221500043	0.0368450320488546	Intron (ENST00000263881.8/8491, intron 2 of 33)	MAP4K3
d35_high_control_vs_experiment	chr2_46780701_46781345	21.664496542604	2.28714613895827	0.00019899661388279	0.0160915363001239	Intron (ENST00000650611.1/388948, intron 1 of 7)	LINC01118
d35_high_control_vs_experiment	chr2_47226522_47228283	42.3927086540794	2.66046437336765	5.15238333590442e-06	0.00330996591867449	Exon (ENST00000666175.2/ENST00000666175.2, exon 1 of 2)	CALM2
d35_high_control_vs_experiment	chr2_48205061_48205789	17.1426939787397	2.24516922796001	0.00169229638200285	0.0454113626605816	Intron (ENST00000651429.1/105374591, intron 2 of 8)	LOC105374591
d35_high_control_vs_experiment	chr2_49032923_49034079	19.7049548021722	2.90928514489532	0.000177165188610629	0.0152399633187284	Intron (ENST00000634588.1/ENST00000634588.1, intron 2 of 4)	MIR548BA
d35_high_control_vs_experiment	chr2_55123719_55124598	38.0461823508197	3.10151592092369	0.000109766702364209	0.0125767374488565	Distal Intergenic	RTN4
d35_high_control_vs_experiment	chr2_55133592_55134614	66.2871938459459	2.95839008922937	2.1437088626206e-05	0.00634356367664254	Distal Intergenic	RTN4
d35_high_control_vs_experiment	chr2_57878659_57879272	17.4014474331169	2.68206426553927	0.00146391410548275	0.0424340316056101	Distal Intergenic	VRK2
d35_high_control_vs_experiment	chr2_57886023_57886795	18.4229723166405	3.35605823462244	0.000247345097975866	0.0179335709528237	Distal Intergenic	VRK2
d35_high_control_vs_experiment	chr2_59249493_59250603	28.8708294132692	3.17439387910308	0.000135479539346185	0.0138822465920786	Promoter (<=1kb)	LOC105374754
d35_high_control_vs_experiment	chr2_59458604_59459348	21.1405646672626	2.02900249159316	0.00182026620230221	0.0471290935000137	Intron (ENST00000606382.1/ENST00000606382.1, intron 3 of 3)	LOC105374754
d35_high_control_vs_experiment	chr2_5980912_5982113	61.5451453161452	1.78337220567882	0.000147361954816539	0.0142633790181009	Promoter (<=1kb)	LOC400940
d35_high_control_vs_experiment	chr2_5985442_5986226	30.6134554787235	2.83400119966106	0.00198184463914179	0.0489036105349621	Promoter (2-3kb)	LOC400940
d35_high_control_vs_experiment	chr2_62475213_62476199	39.3080971056922	1.69591199279494	0.00107410407876952	0.0365304741269295	Distal Intergenic	LOC105374764
d35_high_control_vs_experiment	chr2_62685946_62686801	21.5237759174507	3.65229839505129	0.000246794042546378	0.0179310364648547	Intron (ENST00000405015.7/23301, intron 1 of 22)	EHBP1
d35_high_control_vs_experiment	chr2_6325425_6326239	26.2703144539153	2.75734630438304	0.000412342903302402	0.0227683029053058	Exon (ENST00000425125.1/ENST00000425125.1, exon 1 of 3)	LOC105373401
d35_high_control_vs_experiment	chr2_79832326_79833547	42.5152457092928	2.42202044655684	0.000449513453466819	0.0237015467879339	Intron (ENST00000466387.5/1496, intron 7 of 21)	MIR8080
d35_high_control_vs_experiment	chr20_10014219_10015000	18.1297758347403	3.16972201089315	0.000107955853736269	0.0124451408841293	Intron (ENST00000437504.1/101929371, intron 1 of 1)	SNAP25-AS1
d35_high_control_vs_experiment	chr20_11979329_11980143	36.8799904752358	3.86622132175118	3.46313552777645e-05	0.00772397400909487	Distal Intergenic	BTBD3
d35_high_control_vs_experiment	chr20_13994943_13996510	270.853139227264	1.06011967942695	0.00181096330466159	0.046969126772473	Promoter (<=1kb)	MACROD2
d35_high_control_vs_experiment	chr20_15012380_15013098	24.1033634269617	2.40021171678052	0.000752083945990864	0.0305890203412004	Intron (ENST00000217246.8/140733, intron 5 of 16)	MACROD2-AS1
d35_high_control_vs_experiment	chr20_18739808_18740427	26.0162512679714	2.88147783396359	0.000152773950959395	0.0143985856915179	Intron (ENST00000618693.4/92675, intron 4 of 4)	DTD1-AS1
d35_high_control_vs_experiment	chr20_24100485_24101047	17.6963693178484	1.75776977365487	0.00110065707878959	0.0369569522825652	Intron (ENST00000669143.1/400839, intron 2 of 4)	LINC01721
d35_high_control_vs_experiment	chr20_25032424_25033650	59.7926108641273	1.89115315956594	0.00179660662534526	0.0467370572711472	Promoter (<=1kb)	ACSS1
d35_high_control_vs_experiment	chr20_38671211_38671566	18.2704316108118	3.06019811515322	0.000379468594551542	0.0219061507204149	Distal Intergenic	ARHGAP40
d35_high_control_vs_experiment	chr20_44038502_44039293	26.9000272098504	2.20013159586261	0.00146572420845107	0.0424406210807715	Promoter (<=1kb)	TOX2
d35_high_control_vs_experiment	chr20_5212787_5213516	33.1901080757799	3.43724721986028	0.000394488341140804	0.0223526045540864	Distal Intergenic	CDS2
d35_high_control_vs_experiment	chr20_5658872_5659800	29.1238522772503	1.77489464247308	0.0014130106756895	0.041707804985176	Distal Intergenic	GPCPD1
d35_high_control_vs_experiment	chr20_5910891_5912160	130.748882610316	1.02205047717749	0.00195198235064929	0.048594897077233	Promoter (<=1kb)	CHGB
d35_high_control_vs_experiment	chr20_7392312_7393440	26.6919766648506	2.80096365184839	9.20757608415452e-05	0.0116607318858511	Distal Intergenic	MIR8062
d35_high_control_vs_experiment	chr20_9573270_9574908	100.317882806759	2.5828090736608	0.000849219532581212	0.032466872809449	Intron (ENST00000353224.10/57144, intron 4 of 9)	LOC105372523
d35_high_control_vs_experiment	chr20_9838045_9839631	205.360709043776	1.30610421864522	8.85942074032002e-05	0.0115007981242539	Promoter (<=1kb)	PAK5
d35_high_control_vs_experiment	chr21_16072649_16073072	18.2156250013385	2.93202840789321	0.000416110330674578	0.0228207900250478	Promoter (<=1kb)	MIR99AHG
d35_high_control_vs_experiment	chr21_26033690_26034379	19.5565691622615	2.76234649732889	0.000788338734718045	0.0312543126419251	Intron (ENST00000354192.7/351, intron 4 of 14)	APP
d35_high_control_vs_experiment	chr21_26795604_26796377	16.2434593487682	2.32862931809797	0.000908934346548243	0.0335275345113549	Distal Intergenic	ADAMTS1
d35_high_control_vs_experiment	chr21_28745009_28746084	37.396015191848	1.36566317408439	0.00142201630136775	0.0418244180205648	Distal Intergenic	N6AMT1
d35_high_control_vs_experiment	chr21_29486953_29488034	47.6887326654325	3.39556088521622	0.000120494480395683	0.0130311746514252	Intron (ENST00000422809.5/571, intron 2 of 4)	BACH1-IT3
d35_high_control_vs_experiment	chr21_32335620_32336418	24.1476246847211	2.8808766429777	0.00182344619686213	0.0471708052905352	Promoter (<=1kb)	URB1
d35_high_control_vs_experiment	chr21_32604236_32605173	34.6147159627007	2.01201707031158	0.00189310609255248	0.0479658138147566	Promoter (<=1kb)	CFAP298-TCP10L
d35_high_control_vs_experiment	chr21_34204308_34204961	29.7369726885825	1.72687055479066	0.000248490635878494	0.0179626280869965	Intron (ENST00000362077.4/64968, intron 2 of 5)	LINC00310
d35_high_control_vs_experiment	chr22_27022551_27023904	29.4456781307716	2.19869323010496	0.00121469460383694	0.0388508438982527	Exon (ENST00000623027.1/ENST00000623027.1, exon 1 of 1)	LOC284898
d35_high_control_vs_experiment	chr22_49512393_49513002	18.4654237446199	3.75632367026504	1.71544694359597e-05	0.00580182917404396	Intron (ENST00000414287.5/348645, intron 1 of 4)	MIR3667
d35_high_control_vs_experiment	chr22_50085215_50086085	23.1950277375622	2.19875381611984	0.00107715546307064	0.0365928576239759	Promoter (<=1kb)	MLC1
d35_high_control_vs_experiment	chr3_101466659_101467371	17.8758927154211	1.91777089866697	0.00161128704246235	0.0443588362370763	Intron (ENST00000394095.7/57337, intron 3 of 23)	SENP7
d35_high_control_vs_experiment	chr3_106340961_106341533	16.6099529776057	3.45076810905127	0.000119977219451021	0.0130287031411333	Distal Intergenic	LOC101929485
d35_high_control_vs_experiment	chr3_106398853_106399568	25.3181643539973	2.79696212432522	0.00175592407812944	0.0462356432028041	Intron (ENST00000653375.1/101929485, intron 5 of 7)	LOC101929485
d35_high_control_vs_experiment	chr3_10764035_10764740	22.9299190236206	2.31584191537433	0.000440070081336146	0.023478603815044	Promoter (<=1kb)	LINC00606
d35_high_control_vs_experiment	chr3_107977702_107978735	28.9809232629606	4.08352969337237	2.20754553442382e-07	0.00075142078755357	Distal Intergenic	LINC00636
d35_high_control_vs_experiment	chr3_108388371_108389104	23.0649559438622	2.80624353521826	0.000110386724854112	0.0125889249554807	Exon (ENST00000693548.1/22989, exon 38 of 41)	HHLA2
d35_high_control_vs_experiment	chr3_109337403_109338065	18.8447700916232	2.90358723612636	0.000318154841321965	0.0200673191022974	Promoter (<=1kb)	DPPA4
d35_high_control_vs_experiment	chr3_111712203_111713138	30.4632214848796	2.38415837675768	0.00104672669784134	0.0360398240830096	Intron (ENST00000636933.1/257068, intron 2 of 3)	PHLDB2
d35_high_control_vs_experiment	chr3_113297354_113298438	54.2492136177621	3.59745425772084	0.000113287885911582	0.0126982895274928	Promoter (2-3kb)	CFAP44
d35_high_control_vs_experiment	chr3_113532294_113533680	60.0252929294271	1.10023215104712	0.001326911120053	0.0405110922843046	Promoter (<=1kb)	SIDT1
d35_high_control_vs_experiment	chr3_114213341_114215326	73.5977099299362	1.48091537461113	0.00184906599264474	0.047470691352331	Promoter (<=1kb)	NA
d35_high_control_vs_experiment	chr3_115783881_115785114	187.206414535652	1.57224312470783	0.00030637858107223	0.0197371537363847	Intron (ENST00000700882.1/ENST00000700882.1, intron 1 of 1)	LSAMP
d35_high_control_vs_experiment	chr3_115785125_115785571	18.2296347713417	2.26458941028941	6.24414486141845e-05	0.00985578292291853	Intron (ENST00000700882.1/ENST00000700882.1, intron 1 of 1)	LSAMP
d35_high_control_vs_experiment	chr3_115831032_115831802	21.6245493830411	3.48420925739899	0.000121354188647493	0.0130958854331906	Intron (ENST00000539563.5/4045, intron 5 of 5)	LSAMP
d35_high_control_vs_experiment	chr3_115862882_115863452	18.8776999060455	1.74491525760035	0.00066483374710116	0.0287167794865301	Intron (ENST00000539563.5/4045, intron 2 of 5)	LSAMP
d35_high_control_vs_experiment	chr3_116085013_116085811	17.204870256793	2.83996534900049	0.00193235337094754	0.048429775115942	Promoter (<=1kb)	LSAMP
d35_high_control_vs_experiment	chr3_118641162_118641994	37.0571690898884	1.89576065357336	0.0018070418513912	0.0468997870011018	Intron (ENST00000657445.1/105374060, intron 3 of 3)	LOC105374060
d35_high_control_vs_experiment	chr3_123443890_123444519	26.4423711896117	2.32594468355362	0.000110915086416036	0.0126026533374835	Intron (ENST00000462833.6/111, intron 1 of 20)	ADCY5
d35_high_control_vs_experiment	chr3_123660805_123661492	28.6990011459233	2.58852112152484	0.000178725240016407	0.0152826346447476	Promoter (2-3kb)	MYLK
d35_high_control_vs_experiment	chr3_127960425_127961321	23.1558139860982	2.93675688210039	0.000652554612000382	0.0284087089629184	Intron (ENST00000405109.5/166348, intron 4 of 5)	KBTBD12
d35_high_control_vs_experiment	chr3_13095278_13096030	30.69986513131	1.8805795234349	0.000661824931324719	0.0286628731781586	Intron (ENST00000648114.1/9922, intron 2 of 15)	IQSEC1
d35_high_control_vs_experiment	chr3_131796098_131797250	56.3156120138555	2.81411251242209	0.0017636120049704	0.0463244757377557	Intron (ENST00000617767.5/131034, intron 2 of 15)	CPNE4
d35_high_control_vs_experiment	chr3_133211525_133212139	25.2100910516017	2.15363046195885	0.000755269790921593	0.0306439760648552	Intron (ENST00000321871.11/66000, intron 2 of 5)	TMEM108
d35_high_control_vs_experiment	chr3_13477917_13478264	20.1386030160293	2.13078528341116	0.000118703293143745	0.012958658345558	Promoter (1-2kb)	HDAC11
d35_high_control_vs_experiment	chr3_135439146_135439928	25.6551495797761	1.79983365269269	0.000745532757479093	0.030487544006541	Promoter (<=1kb)	LOC102724019
d35_high_control_vs_experiment	chr3_137032381_137033295	48.6878262923799	1.36691407635834	0.000658103354392766	0.0285923083089863	Distal Intergenic	IL20RB-AS1
d35_high_control_vs_experiment	chr3_138329026_138330250	155.803506555796	1.22178369487444	5.31459695994093e-05	0.0092147265052263	Promoter (<=1kb)	NME9
d35_high_control_vs_experiment	chr3_142962929_142964502	109.784590256612	1.17615799299741	0.000865711010849529	0.0327556022416198	Promoter (<=1kb)	PAQR9-AS1
d35_high_control_vs_experiment	chr3_148203098_148204304	23.1576567646645	2.27260806109187	0.00109136779797057	0.0368161263393116	Intron (ENST00000477153.1/ENST00000477153.1, intron 2 of 2)	LINC02046
d35_high_control_vs_experiment	chr3_150255144_150256023	36.2135871324375	2.20076283081239	0.00162723075806161	0.0444832630852175	Distal Intergenic	LINC01213
d35_high_control_vs_experiment	chr3_150511106_150511840	19.944940375142	3.09972246081805	8.74660979699272e-05	0.0114035916542318	Distal Intergenic	SERP1
d35_high_control_vs_experiment	chr3_152318390_152318949	17.0943225918087	3.06795555134168	0.000299593869111315	0.0195858633374663	Intron (ENST00000282486.10/4154, intron 2 of 9)	MBNL1
d35_high_control_vs_experiment	chr3_155805626_155806682	91.2938414732693	1.09380519973993	0.000154319441243698	0.0144716593917398	Promoter (<=1kb)	C3orf33
d35_high_control_vs_experiment	chr3_158631748_158632559	22.8430681482885	3.10905578602158	0.00162755023302603	0.0444839070508433	Distal Intergenic	GFM1
d35_high_control_vs_experiment	chr3_159856442_159857165	47.543933831008	2.53038185336921	0.00033864110237304	0.0207320995967316	Intron (ENST00000476809.7/100505385, intron 4 of 9)	SCHIP1
d35_high_control_vs_experiment	chr3_161212082_161213001	25.0116969597869	2.4358081775097	0.000715692509191441	0.0298354066678323	Intron (ENST00000468606.5/51068, intron 2 of 5)	NMD3
d35_high_control_vs_experiment	chr3_16301164_16302683	36.6668973422735	2.70984007137422	4.93832921028114e-06	0.00327954498433876	3' UTR	RFTN1
d35_high_control_vs_experiment	chr3_16723911_16724806	24.1841590054535	2.12736411533601	2.28633835705023e-05	0.00641864404376149	Distal Intergenic	DAZL
d35_high_control_vs_experiment	chr3_167379716_167380657	108.484444938462	1.33127807690681	0.00170098598791422	0.0455226488576116	Promoter (<=1kb)	ZBBX
d35_high_control_vs_experiment	chr3_168288858_168289959	17.9580811861804	2.78550225948605	0.000349775005028591	0.0210604816289618	Exon (ENST00000496247.1/ENST00000496247.1, exon 1 of 2)	EGFEM1P
d35_high_control_vs_experiment	chr3_168476288_168476986	23.3295075435618	2.70614365916839	0.00136183177212769	0.0410008734518515	Intron (ENST00000502778.5/93556, intron 2 of 2)	EGFEM1P
d35_high_control_vs_experiment	chr3_170492396_170493144	17.2443508392668	3.80875965251802	6.98031027846374e-06	0.0039007997866545	Intron (ENST00000486975.1/5010, intron 2 of 3)	SLC7A14-AS1
d35_high_control_vs_experiment	chr3_172009685_172010279	17.6984811591042	3.56886806469925	1.62165738739228e-05	0.00565604748862515	Distal Intergenic	FNDC3B
d35_high_control_vs_experiment	chr3_173911394_173912424	29.4814720308173	2.96761143272025	0.000532838459057185	0.0257649681739983	Intron (ENST00000695368.1/22871, intron 4 of 6)	NLGN1-AS1
d35_high_control_vs_experiment	chr3_174540120_174540972	22.3323742019322	2.9810981854879	1.19662892366827e-06	0.00181700245404478	Exon (ENST00000481679.5/254827, exon 6 of 6)	NAALADL2
d35_high_control_vs_experiment	chr3_175269986_175270997	47.3633220696352	2.40236474960219	0.00174024210476551	0.0460404601194784	Promoter (<=1kb)	NAALADL2-AS2
d35_high_control_vs_experiment	chr3_176505783_176506651	23.2642559152067	2.46572414106358	0.00107865732636958	0.0366025197712205	Intron (ENST00000652470.1/ENST00000652470.1, intron 2 of 5)	MIR7977
d35_high_control_vs_experiment	chr3_180415773_180416679	23.1626033640912	3.07242642608372	9.7746040437896e-05	0.0119731706285918	Promoter (1-2kb)	LINC02053
d35_high_control_vs_experiment	chr3_181560907_181562127	43.7452721181614	3.28327070240034	0.000787616004522425	0.0312543126419251	Promoter (1-2kb)	SOX2-OT
d35_high_control_vs_experiment	chr3_18386458_18387105	20.7050335995459	3.17887551223933	2.33835905989909e-05	0.00649360143298799	Exon (ENST00000338745.11/6304, exon 8 of 11)	SATB1
d35_high_control_vs_experiment	chr3_187444781_187445927	25.3193916069357	2.91148454983361	4.79547222263389e-05	0.008741455107886	Promoter (2-3kb)	LINC02041
d35_high_control_vs_experiment	chr3_188262855_188263537	18.2698021106789	3.84922005594992	7.63775558238315e-05	0.0108725909841075	Intron (ENST00000448637.5/4026, intron 1 of 6)	LPP
d35_high_control_vs_experiment	chr3_188279449_188280465	35.5324622168344	3.69291198548333	1.58879206726195e-06	0.0020305245475454	Intron (ENST00000448637.5/4026, intron 1 of 6)	LPP
d35_high_control_vs_experiment	chr3_188352138_188352777	16.341496436155	2.54352817519685	0.00185197926279313	0.0474977370542035	Intron (ENST00000448637.5/4026, intron 2 of 6)	LPP
d35_high_control_vs_experiment	chr3_188992983_188993780	32.0001194316567	3.12767978518421	0.00159014883088876	0.0440953477018027	Intron (ENST00000433971.5/285386, intron 1 of 10)	TPRG1
d35_high_control_vs_experiment	chr3_19147836_19148983	66.4427276297178	1.68383772012971	0.000182478654858071	0.0154131265546222	Promoter (<=1kb)	KCNH8
d35_high_control_vs_experiment	chr3_192445693_192446556	24.3736142096197	2.36452233828802	0.000124288492822192	0.0133264391465734	Intron (ENST00000445105.7/2257, intron 2 of 5)	FGF12
d35_high_control_vs_experiment	chr3_192825451_192826121	17.2007802917274	3.34118809715722	0.000461426681327287	0.024005625915443	Intron (ENST00000392452.3/151963, intron 1 of 1)	FGF12
d35_high_control_vs_experiment	chr3_193342520_193343063	16.7823826645347	2.73407213859807	0.00039329704782795	0.0223019157731937	Intron (ENST00000342358.9/344905, intron 9 of 29)	ATP13A5
d35_high_control_vs_experiment	chr3_197887282_197888027	23.655602304957	3.85317201892513	2.5304422476624e-06	0.00256174979816075	3' UTR	LRCH3
d35_high_control_vs_experiment	chr3_23481048_23482130	26.9946080413025	3.28868189986109	1.25768706524365e-05	0.00506868118184322	Intron (ENST00000425792.5/7325, intron 3 of 5)	UBE2E2
d35_high_control_vs_experiment	chr3_23776317_23777041	22.0256668073761	2.35529061383873	0.000299653287191458	0.0195858633374663	Distal Intergenic	UBE2E1
d35_high_control_vs_experiment	chr3_24828879_24830723	106.949442949037	1.13043420916148	0.00207344421641309	0.0499614119485346	Promoter (<=1kb)	RARB
d35_high_control_vs_experiment	chr3_25647803_25648553	23.6906316188664	1.84843058027165	0.000429533785483127	0.023159851615047	Promoter (2-3kb)	TOP2B
d35_high_control_vs_experiment	chr3_28171386_28172414	19.6855727815006	3.03192404552905	3.17631297937507e-05	0.00736303940001109	Distal Intergenic	CMC1
d35_high_control_vs_experiment	chr3_29759095_29760257	80.0440874940113	2.87995228280224	0.000235761879128579	0.0175519734437766	Promoter (2-3kb)	RBMS3
d35_high_control_vs_experiment	chr3_31959995_31960963	33.1973659363057	3.06710696947461	3.45011273340018e-06	0.00280679965301825	Promoter (<=1kb)	OSBPL10
d35_high_control_vs_experiment	chr3_32450784_32451516	29.5035171161795	4.02742081133602	5.50059445466817e-06	0.00345973582174892	Promoter (<=1kb)	CMTM7
d35_high_control_vs_experiment	chr3_33883567_33884529	24.4455575856672	2.29630774894977	3.19083298851054e-06	0.00275591225293767	Distal Intergenic	PDCD6IP
d35_high_control_vs_experiment	chr3_35638809_35640256	74.0406743476117	1.57924652194577	0.000569501972176701	0.0264474463909369	Promoter (<=1kb)	ARPP21
d35_high_control_vs_experiment	chr3_36969604_36970331	49.2255205338419	2.17317828042875	0.0006015402529714	0.0270819222904839	Distal Intergenic	EPM2AIP1
d35_high_control_vs_experiment	chr3_37256021_37256986	16.059794383999	2.3406384443422	0.000153392403721307	0.0144116956808784	Intron (ENST00000435830.6/2803, intron 4 of 15)	GOLGA4-AS1
d35_high_control_vs_experiment	chr3_38640752_38641649	51.6544079364679	2.55162609199305	0.000661296439858565	0.0286482384212504	Intron (ENST00000333535.9/6331, intron 1 of 27)	SCN5A
d35_high_control_vs_experiment	chr3_38651082_38651626	24.2364172342951	1.5140070248037	0.00133551717477022	0.0406400039063427	Promoter (1-2kb)	SCN5A
d35_high_control_vs_experiment	chr3_40327608_40328658	23.4377122014952	1.72838054158511	0.00178362217936959	0.046594264551607	Intron (ENST00000439293.5/285266, intron 2 of 2)	EIF1B
d35_high_control_vs_experiment	chr3_42148889_42149921	62.4909572286233	2.34131680470413	1.25004776789288e-06	0.00186955076909814	Promoter (<=1kb)	TRAK1
d35_high_control_vs_experiment	chr3_43153355_43154135	16.6677922898523	2.15576006933155	0.000265248949176516	0.0185544663959794	Distal Intergenic	POMGNT2
d35_high_control_vs_experiment	chr3_46047574_46048364	20.3549026676895	3.38901982490406	0.000694378263330535	0.0293621413319726	Intron (ENST00000683768.1/2829, intron 5 of 5)	XCR1
d35_high_control_vs_experiment	chr3_5095755_5096647	34.7142854115436	2.2938981343816	0.000218854155091369	0.016862668399021	Distal Intergenic	ARL8B
d35_high_control_vs_experiment	chr3_5230939_5231934	16.6168724102818	2.16947574010225	0.000274417064589576	0.0188721045207215	Distal Intergenic	MIR4790
d35_high_control_vs_experiment	chr3_54087424_54088313	24.4135795368733	1.91954869815789	0.000263002311818945	0.0184746834225154	Intron (ENST00000666932.1/ENST00000666932.1, intron 2 of 2)	CACNA2D3
d35_high_control_vs_experiment	chr3_65478501_65479480	43.0585054454574	2.76511134358535	0.000448079667768282	0.0236610791202641	Promoter (<=1kb)	MAGI1
d35_high_control_vs_experiment	chr3_65497776_65498338	25.2814072623947	3.17525727538096	0.000290774735258727	0.0193959359212976	Intron (ENST00000330909.12/9223, intron 2 of 24)	MAGI1
d35_high_control_vs_experiment	chr3_65539375_65540173	42.4910497252264	3.25884481460708	4.14621205036798e-05	0.00838423972828503	Intron (ENST00000330909.12/9223, intron 2 of 24)	MAGI1
d35_high_control_vs_experiment	chr3_66418515_66419462	36.3623461233691	3.06174963692628	8.53253982632413e-05	0.0113331665065661	Promoter (<=1kb)	LRIG1
d35_high_control_vs_experiment	chr3_66456674_66457168	21.747262914024	2.74656991413781	0.00112229919585661	0.0373333982334907	Intron (ENST00000383703.3/26018, intron 2 of 19)	LRIG1
d35_high_control_vs_experiment	chr3_66478872_66479373	18.5177892173776	2.88774600436809	0.000299879285853939	0.0195858633374663	Intron (ENST00000383703.3/26018, intron 1 of 19)	LRIG1
d35_high_control_vs_experiment	chr3_6769449_6771621	45.4377133262663	3.02542234638553	5.57462657903441e-05	0.0094370015821323	Promoter (<=1kb)	GRM7
d35_high_control_vs_experiment	chr3_72145388_72146293	36.184171401745	1.67223016482656	0.00134847157016055	0.0407783119662815	Intron (ENST00000690747.1/285286, intron 2 of 7)	LINC00870
d35_high_control_vs_experiment	chr3_72152530_72153520	23.9205094462368	2.98667552823436	5.50573489718991e-05	0.00938750076531875	Promoter (<=1kb)	LINC00870
d35_high_control_vs_experiment	chr3_73433621_73434266	25.024926906171	2.58476696324932	0.000346005850879025	0.0210069990037921	Promoter (<=1kb)	PDZRN3
d35_high_control_vs_experiment	chr3_77079721_77080717	46.7299036326686	2.80615626442616	0.00114543164207056	0.0377315486753548	Intron (ENST00000487694.7/6092, intron 2 of 26)	ROBO2
d35_high_control_vs_experiment	chr3_77540993_77542026	17.1250226581282	2.4570505591817	0.000337671024745694	0.0207193595261008	Intron (ENST00000487694.7/6092, intron 7 of 26)	ROBO2
d35_high_control_vs_experiment	chr3_7977724_7978605	52.5899259788321	2.81399023684393	0.000972481826058328	0.0347975744648403	Intron (ENST00000654635.1/101927394, intron 5 of 6)	LOC101927394
d35_high_control_vs_experiment	chr3_8110977_8111670	39.2404140832531	1.61638313159308	0.000562717672502744	0.0263049603255164	Intron (ENST00000428171.1/ENST00000428171.1, intron 5 of 5)	LOC101927394
d35_high_control_vs_experiment	chr3_84958427_84960056	233.362040794535	1.11323347607962	0.0020525086382739	0.0496929233449065	Promoter (<=1kb)	CADM2
d35_high_control_vs_experiment	chr3_8528983_8529586	16.035114242056	2.17775575072274	0.000201703718122368	0.0161626393532756	Intron (ENST00000426878.2/29995, intron 1 of 4)	LMCD1
d35_high_control_vs_experiment	chr3_89107149_89108443	91.9531905797335	1.57037390779909	0.000396357815039848	0.0224178940264296	Promoter (<=1kb)	EPHA3
d35_high_control_vs_experiment	chr3_89171699_89172833	85.9181586747847	4.74695246178819	4.70985524900096e-08	0.000354004495153034	Intron (ENST00000336596.7/2042, intron 2 of 16)	EPHA3
d35_high_control_vs_experiment	chr3_9022741_9023388	16.7588871006372	2.27305871162044	0.00181007149650182	0.0469622018832648	Intron (ENST00000383836.8/9901, intron 14 of 21)	SRGAP3
d35_high_control_vs_experiment	chr3_9121267_9121959	27.6708336800594	3.07753935543872	0.000160697992320285	0.0146593257640423	Intron (ENST00000383836.8/9901, intron 2 of 21)	SRGAP3
d35_high_control_vs_experiment	chr3_94158986_94160111	58.1273505419114	3.50153935023293	6.43353701186417e-05	0.00994980916984035	Distal Intergenic	DHFR2
d35_high_control_vs_experiment	chr3_97646810_97648015	27.9793603409749	2.91377946280929	0.000101532111245527	0.0121326030389379	Intron (ENST00000389672.10/285220, intron 14 of 17)	EPHA6
d35_high_control_vs_experiment	chr4_100848753_100849742	27.4970671118232	2.32280595189561	0.00067299259438695	0.0289050319289195	Intron (ENST00000510657.1/107986233, intron 2 of 5)	LINC01218
d35_high_control_vs_experiment	chr4_101701425_101702806	32.7125485771995	3.02047695914851	0.00136720533556786	0.041067594403236	Intron (ENST00000504592.5/55024, intron 4 of 20)	BANK1
d35_high_control_vs_experiment	chr4_103306545_103307827	41.4524096903579	1.43702112919756	0.001115276765009	0.0372107448504603	Intron (ENST00000668077.1/ENST00000668077.1, intron 2 of 3)	LINC02428
d35_high_control_vs_experiment	chr4_104022686_104023321	17.94838667336	2.74553827078616	0.00168757618995659	0.0453373953391483	Intron (ENST00000510505.2/105377349, intron 2 of 3)	LINC02503
d35_high_control_vs_experiment	chr4_104394265_104395323	32.6097079241017	2.6803481178876	9.55011316018644e-07	0.00168362107706204	Exon (ENST00000514327.5/ENST00000514327.5, exon 4 of 6)	CXXC4
d35_high_control_vs_experiment	chr4_104492120_104492843	74.8913366327223	1.92188788288102	0.000426151768093652	0.0230602104170908	Promoter (1-2kb)	CXXC4-AS1
d35_high_control_vs_experiment	chr4_10554638_10555441	29.3092486201021	2.91143032979883	2.19868081530221e-05	0.00639430990823205	Intron (ENST00000226951.11/116449, intron 8 of 18)	CLNK
d35_high_control_vs_experiment	chr4_110197384_110197934	45.5142473632685	1.26570428282298	0.000510189309482652	0.0251261283350885	Promoter (<=1kb)	ELOVL6
d35_high_control_vs_experiment	chr4_112411660_112413168	74.1540040197101	3.06169536481515	8.64841294402933e-05	0.0113872083858311	Promoter (<=1kb)	ALPK1
d35_high_control_vs_experiment	chr4_117084951_117085965	79.4130151682146	1.5108525265546	0.00166612843112324	0.0449740988343691	Promoter (<=1kb)	TRAM1L1
d35_high_control_vs_experiment	chr4_117908222_117909132	19.971246588168	3.28921506198629	0.000127969167553725	0.0135281048611207	Distal Intergenic	LINC02264
d35_high_control_vs_experiment	chr4_118351915_118353527	109.507381537932	1.2457119505476	0.000827060723212885	0.0320200665969364	Promoter (<=1kb)	PRSS12
d35_high_control_vs_experiment	chr4_120081437_120082774	23.1499984322707	2.42169873490107	0.0010618271689795	0.03629209895849	Intron (ENST00000693300.2/121009649, intron 1 of 2)	MAD2L1-DT
d35_high_control_vs_experiment	chr4_124644771_124645837	17.1112323315828	3.06470090066709	0.00150763218546174	0.0429151312780792	Distal Intergenic	ANKRD50
d35_high_control_vs_experiment	chr4_127048402_127050198	88.546187136787	3.14491883585546	0.000380569491733989	0.0219221727843452	Intron (ENST00000506852.1/102724210, intron 2 of 2)	LOC102724210
d35_high_control_vs_experiment	chr4_127622651_127623930	97.0271652551595	1.50620610885623	0.000257775651308394	0.0182924157042653	Promoter (<=1kb)	LOC105377412
d35_high_control_vs_experiment	chr4_128453887_128454907	50.0791295655413	2.01231343160546	0.000720653631699533	0.0299187204582615	Promoter (<=1kb)	LINC02615
d35_high_control_vs_experiment	chr4_128597024_128597893	20.7363930818591	3.58444886361403	0.000311610111330963	0.019899231089986	Intron (ENST00000487657.2/ENST00000487657.2, intron 1 of 1)	LOC101927259
d35_high_control_vs_experiment	chr4_128635165_128636360	82.2866247636246	4.05940847782583	8.63353351419123e-08	0.000501126962521145	Distal Intergenic	LOC101927259
d35_high_control_vs_experiment	chr4_133150999_133152300	103.25540088408	1.5969410149245	0.000161141241464988	0.0146766343957069	Promoter (1-2kb)	PCDH10
d35_high_control_vs_experiment	chr4_133156105_133156765	46.8932604435533	3.02949350002787	0.00132769791741877	0.0405118960662727	Promoter (1-2kb)	PCDH10
d35_high_control_vs_experiment	chr4_133969268_133969949	25.3395354497206	3.08530242225258	0.000113632628608601	0.0127051056434701	Intron (ENST00000507844.1/132430, intron 3 of 3)	PABPC4L
d35_high_control_vs_experiment	chr4_140093869_140095248	65.8885141626279	1.98159796246586	0.000343153065564487	0.0209267685926903	Intron (ENST00000509479.6/55534, intron 1 of 4)	LOC101927516
d35_high_control_vs_experiment	chr4_140134982_140136118	25.6245293730446	2.97444963811591	3.09156971904452e-06	0.00275591225293767	Intron (ENST00000509479.6/55534, intron 1 of 4)	LOC101927516
d35_high_control_vs_experiment	chr4_140286261_140287111	29.9641138832318	2.91131248526323	0.000169071720077901	0.0148891073935035	Exon (ENST00000664103.1/100129858, exon 4 of 4)	SCOC
d35_high_control_vs_experiment	chr4_141307126_141307685	22.3015900721711	1.7559035250589	0.000116329693369072	0.0128582802615484	Intron (ENST00000653420.1/100507639, intron 4 of 4)	LINC02432
d35_high_control_vs_experiment	chr4_145481247_145483025	140.070309384077	1.06285846631907	0.00146061392431301	0.0423874108440835	Promoter (<=1kb)	SMAD1
d35_high_control_vs_experiment	chr4_14867601_14868349	33.5619899061368	2.07724574191241	0.000250229974840391	0.018049818122784	Intron (ENST00000505089.6/201853, intron 1 of 6)	LINC00504
d35_high_control_vs_experiment	chr4_150150639_150151213	17.6527662375881	3.58816889889421	4.320235179265e-06	0.00310424673814822	Intron (ENST00000296550.12/166614, intron 2 of 15)	DCLK2
d35_high_control_vs_experiment	chr4_150216731_150217742	37.1146469612575	2.14181553744951	9.00695106764343e-05	0.0115536899775777	Intron (ENST00000296550.12/166614, intron 5 of 15)	DCLK2
d35_high_control_vs_experiment	chr4_151540934_151542141	72.7820003677817	2.41684964131727	0.000190970315391357	0.01579945661046	Intron (ENST00000435205.6/729830, intron 3 of 13)	FHIP1A
d35_high_control_vs_experiment	chr4_151717104_151718764	59.1988428722331	2.81068369890089	7.49145476349983e-06	0.00405090984648602	Promoter (<=1kb)	GATB
d35_high_control_vs_experiment	chr4_151718884_151719579	40.8992064241242	2.63380546689358	2.82794351394453e-06	0.00265869193022838	Promoter (1-2kb)	GATB
d35_high_control_vs_experiment	chr4_151991481_151993346	66.102798339473	3.60010599346591	5.07241825565384e-05	0.00899187823444767	Exon (ENST00000652265.1/ENST00000652265.1, exon 1 of 2)	LOC100505685
d35_high_control_vs_experiment	chr4_152606774_152607613	18.383556503443	1.88431703780461	0.00149506117818397	0.04278377638011	Distal Intergenic	TMEM154
d35_high_control_vs_experiment	chr4_153241639_153242929	33.7949077295335	2.16571526496876	0.000161483888997232	0.0146766343957069	Intron (ENST00000676423.1/23321, intron 1 of 11)	TRIM2
d35_high_control_vs_experiment	chr4_153535996_153536694	40.7710247225497	3.89485187145293	1.50846856214538e-09	4.64256612820135e-05	Intron (ENST00000409663.7/23240, intron 3 of 34)	TMEM131L
d35_high_control_vs_experiment	chr4_153629206_153630378	30.471272241273	2.5679085277179	0.00174983995506286	0.0461433087869149	Promoter (1-2kb)	TMEM131L
d35_high_control_vs_experiment	chr4_153764342_153765436	49.4517518359445	2.82359319697079	0.000553856879047856	0.0261705896330007	Distal Intergenic	RNF175
d35_high_control_vs_experiment	chr4_154626629_154627606	48.9835297678271	1.38388905639761	0.00192173935885718	0.0482682488087228	Promoter (<=1kb)	LRAT
d35_high_control_vs_experiment	chr4_155403666_155404360	19.0467648069799	2.30279220186773	0.000763637604946016	0.0307840769545481	Distal Intergenic	MAP9
d35_high_control_vs_experiment	chr4_159047737_159048674	64.6801101676721	2.59559656876606	0.000172896187052311	0.0150321684896696	Distal Intergenic	C4orf45
d35_high_control_vs_experiment	chr4_159446362_159446965	26.754920350422	1.58468199996706	0.00158794679118512	0.0440882410585515	Distal Intergenic	RAPGEF2
d35_high_control_vs_experiment	chr4_162134559_162135287	30.7561766243228	3.98452358554898	6.23825602587189e-05	0.00985578292291853	Intron (ENST00000306100.10/56884, intron 1 of 15)	FSTL5
d35_high_control_vs_experiment	chr4_164383032_164384370	201.276633818315	1.39807838853769	0.00165123886116683	0.0447570288144435	Promoter (<=1kb)	MARCHF1
d35_high_control_vs_experiment	chr4_164799298_164800055	24.2314243599725	2.71357171351879	0.0013517243083299	0.0408438103818478	Intron (ENST00000515485.5/100505989, intron 3 of 3)	SMIM31
d35_high_control_vs_experiment	chr4_164866706_164867618	22.3455918437354	2.53840979503495	0.00186318304112789	0.0476159602386838	Distal Intergenic	APELA
d35_high_control_vs_experiment	chr4_165206719_165208245	173.564642390547	1.29334138002373	0.00104805234651213	0.0360770480855132	Promoter (<=1kb)	KLHL2
d35_high_control_vs_experiment	chr4_16597840_16598456	19.1465649771696	2.47826379145723	0.00144901296359364	0.0422156456678925	Promoter (1-2kb)	LDB2
d35_high_control_vs_experiment	chr4_168923754_168924160	18.7226385124923	1.89679872449798	0.00109072234423191	0.0368124913328831	Promoter (2-3kb)	PALLD
d35_high_control_vs_experiment	chr4_169315544_169316271	17.9387522164731	1.94939564210406	0.00132389143637023	0.040467924986926	Distal Intergenic	SH3RF1
d35_high_control_vs_experiment	chr4_170259425_170260248	49.8498919962528	1.30283270327842	0.000837684187845818	0.0322223325327335	Promoter (<=1kb)	LINC01612
d35_high_control_vs_experiment	chr4_174521778_174523108	83.7745470789647	1.41585597109855	0.000146700772789825	0.0142367938474051	Promoter (<=1kb)	LOC105377548
d35_high_control_vs_experiment	chr4_17544036_17544667	17.2268567332211	2.516160226038	0.00191054858685911	0.0481561395572763	Distal Intergenic	CLRN2
d35_high_control_vs_experiment	chr4_175812041_175813707	53.5795476058096	2.46688892410969	0.000678384970573864	0.0289863520479908	Promoter (<=1kb)	GPM6A
d35_high_control_vs_experiment	chr4_180541522_180542230	22.6120817282949	3.57094500688003	0.000248995464273574	0.017978022654623	Distal Intergenic	LOC105377565
d35_high_control_vs_experiment	chr4_180542287_180543029	23.5502164648162	3.10935972115324	0.000833051890505361	0.0321298970350102	Distal Intergenic	LOC105377565
d35_high_control_vs_experiment	chr4_18398547_18399292	27.7397460704057	2.32944735693238	0.00161856727755218	0.0443708203395476	Distal Intergenic	LOC105374510
d35_high_control_vs_experiment	chr4_186577707_186578450	17.3569327785244	2.65621602308464	0.00134245926952077	0.0407454116095039	Distal Intergenic	FAT1
d35_high_control_vs_experiment	chr4_188031671_188032969	72.9237691400104	2.86062998823864	1.58017069858864e-05	0.00561558298499614	Distal Intergenic	ZFP42
d35_high_control_vs_experiment	chr4_21948209_21949493	81.1251139149648	1.75496782721456	0.000175015827908237	0.0151376607193934	Promoter (<=1kb)	KCNIP4
d35_high_control_vs_experiment	chr4_25088234_25088890	18.120855158423	2.72283903921059	0.000120267500008003	0.0130311746514252	Distal Intergenic	SEPSECS
d35_high_control_vs_experiment	chr4_26238452_26239725	47.586951128253	1.36174424390152	0.000350787077309128	0.0210854455878085	Intron (ENST00000512351.5/3516, intron 1 of 4)	RBPJ
d35_high_control_vs_experiment	chr4_26670938_26671711	17.986070314564	3.11537656294039	0.000917938117644923	0.033705189920609	Intron (ENST00000512840.5/55296, intron 9 of 12)	TBC1D19
d35_high_control_vs_experiment	chr4_26772306_26773084	21.4720907998473	3.13665046743377	0.000247619713931195	0.0179390040947985	Distal Intergenic	STIM2
d35_high_control_vs_experiment	chr4_36283730_36284348	18.1150410165755	3.49832818355331	5.01908535821304e-05	0.00895010683835558	Promoter (<=1kb)	DTHD1
d35_high_control_vs_experiment	chr4_37889791_37891609	75.8016892283317	1.13224509415602	0.000697417993055618	0.029449258372496	Promoter (<=1kb)	NA
d35_high_control_vs_experiment	chr4_38287133_38288163	58.3102744893978	2.92020280190663	0.000887334025406991	0.0331317653674381	Promoter (<=1kb)	LOC105374409
d35_high_control_vs_experiment	chr4_39062064_39062958	32.3555389015657	2.34602824626369	4.14163217078663e-05	0.00838423972828503	Promoter (<=1kb)	KLHL5
d35_high_control_vs_experiment	chr4_39134616_39135763	57.3463464973388	1.38930153254742	0.00188274978987745	0.0478081692843458	Promoter (<=1kb)	KLHL5
d35_high_control_vs_experiment	chr4_41360151_41362016	169.753010991181	1.25400847827261	0.00129092000507085	0.0400039777239026	Promoter (<=1kb)	LIMCH1
d35_high_control_vs_experiment	chr4_41866851_41867736	37.4314872375132	1.84659443486981	5.47081092048715e-06	0.00345546072110181	Distal Intergenic	LINC00682
d35_high_control_vs_experiment	chr4_54099556_54100905	73.5391544663501	1.98141545804068	0.000511538569346164	0.0251461855581956	Promoter (<=1kb)	GSX2
d35_high_control_vs_experiment	chr4_54276489_54277456	21.8445192271505	2.66164675756879	3.27677014035744e-05	0.00747892320710029	Promoter (<=1kb)	PDGFRA
d35_high_control_vs_experiment	chr4_56544391_56545312	55.9814207199075	1.1271887813818	0.00158843780856887	0.0440882410585515	Intron (ENST00000512175.3/100506564, intron 1 of 8)	THEGL
d35_high_control_vs_experiment	chr4_61910987_61911907	41.8491056695394	2.11612997742489	0.00153535013043881	0.0433186014185836	Intron (ENST00000683033.1/23284, intron 12 of 26)	ADGRL3
d35_high_control_vs_experiment	chr4_64417794_64418500	19.2763961672189	3.75508713302882	6.44762631940999e-05	0.00995112347500315	Distal Intergenic	TECRL
d35_high_control_vs_experiment	chr4_65670164_65671035	134.293447750927	1.70426965552119	0.0010435841804344	0.0359809155788535	Promoter (<=1kb)	EPHA5-AS1
d35_high_control_vs_experiment	chr4_70721656_70722909	91.7234241675264	1.75941735722103	0.000541142485112912	0.0259207107464594	Promoter (<=1kb)	RUFY3
d35_high_control_vs_experiment	chr4_71130796_71132068	32.5948913467415	2.29969635035266	0.000297683376882469	0.0195858633374663	Intron (ENST00000649996.1/8671, intron 2 of 26)	SLC4A4
d35_high_control_vs_experiment	chr4_71827678_71829003	44.0510837377802	3.04816287743283	0.000519399847035273	0.0253584871729709	Distal Intergenic	GC
d35_high_control_vs_experiment	chr4_76469733_76471090	38.2495713638926	3.17732952883201	0.000370474477685114	0.0216543808435146	Intron (ENST00000296043.7/57619, intron 1 of 10)	SHROOM3
d35_high_control_vs_experiment	chr4_7655468_7656412	55.177810059714	1.52938550745777	0.000466264130416176	0.0241306592232232	Intron (ENST00000507866.6/57537, intron 5 of 26)	SORCS2
d35_high_control_vs_experiment	chr4_79050089_79050999	26.620718952368	2.92428277892127	0.000575877379919493	0.0265874591942254	Intron (ENST00000671503.1/100505875, intron 2 of 3)	LINC01088
d35_high_control_vs_experiment	chr4_79198911_79200097	20.3469372153204	3.24230262431937	0.000379993192550247	0.021912802429211	Promoter (1-2kb)	LINC01088
d35_high_control_vs_experiment	chr4_80186406_80187116	24.7545836436773	3.75440644116724	1.40407640793461e-05	0.00530321070408969	Promoter (1-2kb)	PRDM8
d35_high_control_vs_experiment	chr4_80201795_80203481	76.2615027032953	1.0111755483504	0.000980810364327847	0.0349301866897853	Exon (ENST00000504452.5/56978, exon 8 of 8)	PRDM8
d35_high_control_vs_experiment	chr4_81499659_81500380	44.9019062008537	2.52355167439275	0.000744668113663537	0.0304687627072594	Intron (ENST00000638048.1/153020, intron 4 of 16)	RASGEF1B
d35_high_control_vs_experiment	chr4_82499840_82501482	73.1450144842817	3.06089472419536	0.000443105864741804	0.0235453832157341	Intron (ENST00000515780.6/441027, intron 5 of 7)	TMEM150C
d35_high_control_vs_experiment	chr4_8341972_8343258	21.1798332601934	3.39113269693005	2.45897830265921e-05	0.00657732941899015	Distal Intergenic	LINC02517
d35_high_control_vs_experiment	chr4_84224242_84225064	17.4658894281042	3.40412473857897	2.72168093480787e-05	0.00675143047070947	Intron (ENST00000513489.5/101928978, intron 2 of 5)	LINC02994
d35_high_control_vs_experiment	chr4_84378531_84379401	16.9371335461943	2.89180824532165	0.000152664877678685	0.0143985856915179	Intron (ENST00000504840.1/ENST00000504840.1, intron 1 of 2)	LINC02994
d35_high_control_vs_experiment	chr4_86359338_86360533	114.279536966603	1.63155446496573	9.85324465619895e-05	0.0119824395091217	Promoter (<=1kb)	MAPK10
d35_high_control_vs_experiment	chr4_87257419_87258193	19.0822038985153	3.04059571243282	0.0017550849031857	0.04622164296976	Distal Intergenic	KLHL8
d35_high_control_vs_experiment	chr4_88163230_88163867	16.5268424384891	2.88499018442815	0.000451115375586484	0.0237260643057147	Exon (ENST00000471148.1/ENST00000471148.1, exon 1 of 1)	ABCG2
d35_high_control_vs_experiment	chr4_89256514_89257578	16.0820878809765	2.26950499999546	0.00147496022746925	0.0425409432452638	Intron (ENST00000609438.2/285513, intron 1 of 1)	GPRIN3
d35_high_control_vs_experiment	chr4_95018674_95019288	17.354042006298	2.93744265816241	0.00112064966991724	0.0373046538933379	Intron (ENST00000515059.6/658, intron 3 of 12)	BMPR1B
d35_high_control_vs_experiment	chr4_97900047_97900878	26.8290158029591	3.70703726787853	7.25308365815062e-05	0.0105753617935159	Intron (ENST00000522676.5/285555, intron 2 of 4)	STPG2
d35_high_control_vs_experiment	chr4_98565885_98567064	35.3836491466718	1.98092647535394	4.88757591050819e-05	0.00880965046459405	Intron (ENST00000508798.5/10098, intron 1 of 7)	TSPAN5
d35_high_control_vs_experiment	chr4_98586295_98587482	48.134706650576	3.01333413624495	6.85716752254391e-05	0.0102262272601827	Intron (ENST00000508798.5/10098, intron 1 of 7)	TSPAN5
d35_high_control_vs_experiment	chr4_9949502_9950086	17.1688444963525	2.75064642321037	0.000613358015530199	0.0273680747060188	Intron (ENST00000264784.8/56606, intron 5 of 11)	SLC2A9
d35_high_control_vs_experiment	chr5_107367437_107368417	36.8737604492343	2.65475280114211	0.00119481507846399	0.0385182450504179	Distal Intergenic	EFNA5
d35_high_control_vs_experiment	chr5_107437789_107438565	28.4187149037627	3.03699532078987	0.000863314747586539	0.0327081723517035	Intron (ENST00000333274.11/1946, intron 1 of 4)	EFNA5
d35_high_control_vs_experiment	chr5_107511765_107512831	45.2920702153394	2.27049800152063	0.000182712201955262	0.0154131265546222	Intron (ENST00000333274.11/1946, intron 1 of 4)	EFNA5
d35_high_control_vs_experiment	chr5_107517906_107518693	23.9296877319067	3.42326781078951	2.60018856553041e-05	0.0066788375233606	Intron (ENST00000333274.11/1946, intron 1 of 4)	EFNA5
d35_high_control_vs_experiment	chr5_107538625_107539533	39.6313941235924	2.89033321106539	0.000229623897355776	0.0173182327859472	Intron (ENST00000333274.11/1946, intron 1 of 4)	EFNA5
d35_high_control_vs_experiment	chr5_107633238_107634071	29.0039075059214	2.07248755632391	0.00130699571450768	0.040244598685655	Intron (ENST00000333274.11/1946, intron 1 of 4)	EFNA5
d35_high_control_vs_experiment	chr5_108685533_108687151	56.5237671262301	1.59246580666019	0.000466082312223753	0.0241306592232232	Distal Intergenic	LINC01023
d35_high_control_vs_experiment	chr5_109645543_109646367	30.6125887294761	2.88234774906268	0.000181025233777606	0.0153743606031744	Distal Intergenic	MAN2A1
d35_high_control_vs_experiment	chr5_111223590_111225007	176.720338850029	1.5718788904541	0.00136666217454901	0.041067594403236	Promoter (<=1kb)	CAMK4
d35_high_control_vs_experiment	chr5_112625570_112626597	55.2693723754486	3.23179436975985	0.0003918687398494	0.0222629131964705	Promoter (1-2kb)	LINC02200
d35_high_control_vs_experiment	chr5_113682531_113683198	20.1349326421885	1.91241587779234	0.00113443657935616	0.0375460543354723	Distal Intergenic	YTHDC2
d35_high_control_vs_experiment	chr5_113806186_113807962	54.7284955198175	1.62878872973661	0.000220455904208645	0.0169341000511827	Distal Intergenic	LOC105379127
d35_high_control_vs_experiment	chr5_113874543_113875565	18.9205038372914	3.25562962201614	0.00053227423438387	0.0257580625438551	Distal Intergenic	LOC105379127
d35_high_control_vs_experiment	chr5_114360683_114362875	290.558622799539	1.45898018157566	0.000972944090676266	0.0347975744648403	Promoter (<=1kb)	KCNN2
d35_high_control_vs_experiment	chr5_114449583_114450544	47.5410407578708	1.2250492564635	0.00189130568005701	0.0479286671536657	Intron (ENST00000512097.9/3781, intron 6 of 10)	KCNN2
d35_high_control_vs_experiment	chr5_115328575_115329871	34.5038310118836	3.4933649024956	2.09338722757436e-05	0.0063169723754716	Distal Intergenic	CCDC112
d35_high_control_vs_experiment	chr5_115472259_115473117	22.4580011956589	2.88820215225183	0.00117869093657389	0.0382498938911532	Distal Intergenic	LOC105379130
d35_high_control_vs_experiment	chr5_115815655_115817128	158.755639518546	1.15696108537077	0.00101302521051847	0.0355552217537215	Promoter (<=1kb)	CDO1
d35_high_control_vs_experiment	chr5_115962314_115963460	36.7748933952965	1.69812128491538	0.00179315774577948	0.0466926101046769	Promoter (<=1kb)	LVRN
d35_high_control_vs_experiment	chr5_116378205_116379105	44.8970425894928	2.24171594525002	0.000399620952111613	0.0224809554017487	Intron (ENST00000503424.1/ENST00000503424.1, intron 3 of 5)	SEMA6A-AS1
d35_high_control_vs_experiment	chr5_118450558_118451487	37.5337793545462	3.01688712062633	0.000937957662862535	0.0340978993501977	Intron (ENST00000660173.1/101927280, intron 5 of 6)	LINC02208
d35_high_control_vs_experiment	chr5_118597419_118598425	37.1487386230607	3.21863412970489	0.000976814376390383	0.0348704870887875	Promoter (1-2kb)	LINC02215
d35_high_control_vs_experiment	chr5_122165721_122166447	27.1514001983837	3.88880328439066	3.5684878223449e-05	0.007840578402914	Intron (ENST00000698748.1/100505841, intron 4 of 5)	LOC100505841
d35_high_control_vs_experiment	chr5_122415098_122415931	39.9688103745678	1.18881144481252	0.00174837195755973	0.0461337571564272	Intron (ENST00000514467.5/9627, intron 3 of 3)	SNCAIP
d35_high_control_vs_experiment	chr5_122423880_122424748	37.2410077956322	2.76964646908766	0.0018147761603281	0.0470436672359581	Intron (ENST00000510658.5/9627, intron 3 of 9)	SNCAIP
d35_high_control_vs_experiment	chr5_124234171_124235242	25.988258430007	2.32837516851782	0.000905367448816575	0.0334521028524834	Intron (ENST00000628324.2/103724389, intron 2 of 3)	LOC101927397
d35_high_control_vs_experiment	chr5_124365094_124366027	27.3549023957934	2.55241293975947	0.000833575069100584	0.0321382847557182	Intron (ENST00000628324.2/103724389, intron 2 of 3)	LINC01170
d35_high_control_vs_experiment	chr5_124634306_124635070	17.1789394482627	3.17388176326184	7.22374974699553e-06	0.00397769296965972	Distal Intergenic	ZNF608
d35_high_control_vs_experiment	chr5_125257275_125258287	23.9791128520623	2.00135129776535	0.00207614101464566	0.0499614119485346	Intron (ENST00000647105.1/101927421, intron 2 of 6)	LOC101927421
d35_high_control_vs_experiment	chr5_126868609_126870022	49.1700774554736	2.0240032402769	0.000454585009347163	0.0237936948224625	3' UTR	MARCHF3
d35_high_control_vs_experiment	chr5_132011379_132012299	43.3441101251522	1.26504681651256	0.00117392096806899	0.0381886322278663	Promoter (<=1kb)	ACSL6
d35_high_control_vs_experiment	chr5_137236681_137237854	22.1525060117655	2.50058611021631	0.00103452972625634	0.0359003302501783	Intron (ENST00000394945.6/6695, intron 3 of 10)	SPOCK1
d35_high_control_vs_experiment	chr5_147563914_147564685	25.93127443383	2.95170748459321	0.000804180545919448	0.0315460003853709	Intron (ENST00000689846.1/153469, intron 1 of 3)	JAKMIP2-AS1
d35_high_control_vs_experiment	chr5_147731719_147733592	37.7805087162223	2.22595321508764	0.00136528210896157	0.041057352882379	Intron (ENST00000616793.5/9832, intron 1 of 21)	LOC105378218
d35_high_control_vs_experiment	chr5_148456879_148457693	26.8721555507483	3.4827373450789	0.000100962962168089	0.0121030759871754	Intron (ENST00000521530.5/3360, intron 5 of 5)	FBXO38
d35_high_control_vs_experiment	chr5_150146998_150147699	39.3851632119419	2.40236459189643	0.000773019502963239	0.0309547567349358	Intron (ENST00000261799.9/5159, intron 1 of 22)	PDGFRB
d35_high_control_vs_experiment	chr5_15483453_15484159	22.6881789552568	2.96182945058475	0.00030100424555284	0.0195858633374663	Intron (ENST00000671652.1/ENST00000671652.1, intron 1 of 1)	FBXL7
d35_high_control_vs_experiment	chr5_15550906_15551623	32.4528143465937	2.71870246021877	0.000553965183517102	0.0261705896330007	Intron (ENST00000504595.2/23194, intron 1 of 3)	FBXL7
d35_high_control_vs_experiment	chr5_160044365_160045482	48.1116349816928	5.53839459771647	6.29823322266008e-10	3.15593969732125e-05	Promoter (1-2kb)	TTC1
d35_high_control_vs_experiment	chr5_162654828_162655655	17.4090951423339	3.36422420470654	4.29001251520147e-05	0.00845211181320656	Intron (ENST00000644348.1/105377697, intron 1 of 13)	LOC105377698
d35_high_control_vs_experiment	chr5_163373323_163374009	17.0639742403473	2.67781790832039	0.000485411231591451	0.0246445115801932	Intron (ENST00000646617.1/105377697, intron 3 of 14)	LOC105377697
d35_high_control_vs_experiment	chr5_16427555_16428202	17.4027258732641	2.12383226490457	0.00158412721257069	0.0440499303051589	Intron (ENST00000513157.1/101929505, intron 6 of 7)	LINC02150
d35_high_control_vs_experiment	chr5_165086269_165087345	21.8708881208926	3.41302665769582	0.000323988689785051	0.0202931665799741	Intron (ENST00000670703.1/105377703, intron 7 of 7)	LOC105377702
d35_high_control_vs_experiment	chr5_16616462_16617486	65.803154087538	1.26167391822373	0.000216524453006193	0.016769210921255	Promoter (<=1kb)	RETREG1
d35_high_control_vs_experiment	chr5_168433894_168434490	41.0359051645613	2.97213566591951	0.00129059048373373	0.0400039777239026	Promoter (2-3kb)	WWC1
d35_high_control_vs_experiment	chr5_16866291_16867607	38.2606286478291	1.66115717159031	0.00188024096216261	0.0477767448676631	Intron (ENST00000513610.6/4651, intron 2 of 40)	MYO10
d35_high_control_vs_experiment	chr5_17218442_17219373	65.7205580716672	1.74645698086292	1.45719951233088e-05	0.00536168424920229	Promoter (<=1kb)	BASP1
d35_high_control_vs_experiment	chr5_173866137_173866895	18.7705037192624	2.94624489335211	0.000114500098448549	0.0127403606952465	Distal Intergenic	CPEB4
d35_high_control_vs_experiment	chr5_174283217_174284446	22.7922493350914	2.9533088641912	8.0202725734921e-05	0.0110698035304127	Distal Intergenic	LINC01411
d35_high_control_vs_experiment	chr5_21341174_21342361	28.2996622105694	2.53061891077239	0.000767827378359345	0.0308619386769702	Promoter (<=1kb)	GUSBP1
d35_high_control_vs_experiment	chr5_32506208_32506853	20.3981288896388	2.62401257363219	0.00134298047712599	0.0407454116095039	Distal Intergenic	SUB1
d35_high_control_vs_experiment	chr5_32531460_32532704	38.4692247143006	1.75657759081547	0.000147048413241822	0.0142521294136537	Promoter (<=1kb)	SUB1
d35_high_control_vs_experiment	chr5_34043170_34043740	18.6631375310328	3.50568177654688	0.000269451128937907	0.0186918509264379	Promoter (<=1kb)	C1QTNF3
d35_high_control_vs_experiment	chr5_35038747_35039643	19.2712514813727	1.97633215297335	0.00206690791739994	0.049872862388948	Exon (ENST00000618015.4/64902, exon 3 of 12)	AGXT2
d35_high_control_vs_experiment	chr5_35803042_35803904	42.8631338992051	1.73774761622101	0.000475393526145274	0.0243798900832729	Intron (ENST00000356031.8/79925, intron 34 of 36)	SPEF2
d35_high_control_vs_experiment	chr5_35858960_35859821	36.270240369147	2.26815291591622	0.000695195637439291	0.0293801754844142	Promoter (2-3kb)	IL7R
d35_high_control_vs_experiment	chr5_36662246_36662934	31.1695994586996	4.57006708262641	2.45538651349398e-07	0.00075142078755357	Intron (ENST00000680318.1/6507, intron 3 of 9)	SLC1A3
d35_high_control_vs_experiment	chr5_51960876_51961620	17.2590802657242	2.20163247847794	0.000272433283878865	0.018798447726301	Distal Intergenic	LINC02118
d35_high_control_vs_experiment	chr5_52043270_52044607	23.8019827822918	3.01105120532516	0.000211663527192704	0.0166066386874964	Exon (ENST00000505899.5/105378960, exon 4 of 4)	LINC02118
d35_high_control_vs_experiment	chr5_54514830_54515345	17.4634590637413	2.3354713706706	0.000626410566121433	0.0277138943944796	Promoter (2-3kb)	SNX18
d35_high_control_vs_experiment	chr5_56233040_56233840	20.074742312036	2.93005792020642	3.78541307739204e-05	0.00798095681429114	Promoter (<=1kb)	ANKRD55
d35_high_control_vs_experiment	chr5_56698988_56700223	43.2508968801681	1.79360702979282	0.000990210193208488	0.0351400725434528	Distal Intergenic	LOC105378979
d35_high_control_vs_experiment	chr5_57696063_57696978	20.2370202899974	3.95965707512275	1.83482268583659e-05	0.00594478377506109	Intron (ENST00000701975.1/101928505, intron 2 of 3)	LOC101928505
d35_high_control_vs_experiment	chr5_58156174_58157599	38.129108170893	2.01892837790043	0.00136801263901776	0.0410684911641033	Distal Intergenic	LINC02101
d35_high_control_vs_experiment	chr5_58999640_59000565	99.4807067861226	3.64947969123527	0.000141981578665599	0.0141195824366761	Promoter (<=1kb)	PDE4D
d35_high_control_vs_experiment	chr5_59586921_59588043	83.0301118893903	1.46478455256775	5.52460941035886e-05	0.00938750076531875	Promoter (<=1kb)	PDE4D
d35_high_control_vs_experiment	chr5_60386429_60387038	16.289189819454	3.66979114897592	7.88092019559523e-05	0.0109796045264398	Intron (ENST00000502484.6/5144, intron 1 of 16)	PDE4D
d35_high_control_vs_experiment	chr5_61732066_61733232	46.8180466000732	3.4322386985268	1.60023024793351e-05	0.0056204348602945	Promoter (2-3kb)	C5orf64-AS1
d35_high_control_vs_experiment	chr5_61736436_61737488	66.9164578430555	2.48627116196466	0.000600746259202343	0.0270634437817422	Promoter (<=1kb)	C5orf64-AS1
d35_high_control_vs_experiment	chr5_61737554_61738355	19.3778603985667	2.50567245907057	5.25691387769242e-05	0.00914672048425186	Promoter (1-2kb)	C5orf64-AS1
d35_high_control_vs_experiment	chr5_65125616_65126516	23.2219891225733	3.53396901790826	1.16883077453122e-05	0.00494942214595509	Distal Intergenic	ADAMTS6
d35_high_control_vs_experiment	chr5_65791580_65792566	22.8088239150849	3.21783392132651	0.000388285447820114	0.0221431173471771	Exon (ENST00000380985.10/57486, exon 9 of 13)	NLN
d35_high_control_vs_experiment	chr5_65801260_65801935	22.5925986901657	4.2896966727091	1.23197745633535e-05	0.0050179705862271	Intron (ENST00000380985.10/57486, intron 9 of 12)	NLN
d35_high_control_vs_experiment	chr5_67192938_67193881	24.3071719976873	2.78862600942411	0.000789157804885571	0.0312545313819034	Promoter (2-3kb)	CD180
d35_high_control_vs_experiment	chr5_6727810_6728740	30.4034449051745	2.00076675497836	0.0014268398685127	0.0418925201629241	Intron (ENST00000230859.8/11044, intron 1 of 12)	TENT4A
d35_high_control_vs_experiment	chr5_6765560_6766107	24.4236668261967	1.46649607248434	0.00134487375539568	0.040759707112874	Promoter (<=1kb)	LOC102724943
d35_high_control_vs_experiment	chr5_67724103_67725172	20.4078686376651	3.65954180008423	4.33305040983603e-05	0.00847418231198277	Intron (ENST00000503106.5/ENST00000503106.5, intron 3 of 3)	LINC02997
d35_high_control_vs_experiment	chr5_68187205_68188126	48.1506497909958	1.98729079236224	0.00057287120973985	0.0265383249935726	Promoter (1-2kb)	LINC02219
d35_high_control_vs_experiment	chr5_76216616_76217738	23.1362784373905	2.37281980305433	0.000737148990774303	0.0303013185775628	Intron (ENST00000502798.7/22987, intron 4 of 12)	SV2C
d35_high_control_vs_experiment	chr5_77984582_77985504	19.2544321928502	2.30065279864391	0.000238266292385635	0.0176440297551086	Distal Intergenic	LOC101929154
d35_high_control_vs_experiment	chr5_82165615_82166384	37.1036084814769	1.61005704758615	0.000725235521184154	0.0300168033375572	Promoter (1-2kb)	ATG10
d35_high_control_vs_experiment	chr5_82849912_82851079	18.6644250292271	3.03627954552593	0.000305518630024883	0.0197027404798329	Exon (ENST00000654717.2/102546175, exon 3 of 3)	LINC01338
d35_high_control_vs_experiment	chr5_83641590_83642847	36.1228229353651	3.74792547476828	5.13388130281643e-05	0.00900525912305577	Exon (ENST00000274341.9/1404, exon 5 of 5)	HAPLN1
d35_high_control_vs_experiment	chr5_87733152_87733860	19.2167268096593	3.46206481672581	4.68523222865488e-05	0.00869515475027833	Promoter (<=1kb)	LINC02144
d35_high_control_vs_experiment	chr5_8843006_8844431	43.3124587209232	2.38822253671051	1.70894917155703e-05	0.00580182917404396	Intron (ENST00000669656.1/101929284, intron 1 of 2)	LINC02199
d35_high_control_vs_experiment	chr5_88555628_88556089	27.8948491372199	3.00711049951454	0.000461662042068808	0.024005625915443	Intron (ENST00000506978.5/645323, intron 3 of 6)	LINC00461
d35_high_control_vs_experiment	chr5_88683511_88684092	48.0591065426264	2.63583707696622	0.000398264177910662	0.0224621546571688	Promoter (<=1kb)	LINC00461
d35_high_control_vs_experiment	chr5_88813937_88814671	19.6045580524636	2.40222794169062	0.00170287971090604	0.0455435489524618	Intron (ENST00000504921.7/4208, intron 2 of 10)	MEF2C
d35_high_control_vs_experiment	chr5_89606822_89607534	18.3760732557883	2.55317614229539	0.000616282489298036	0.0274789949815829	Intron (ENST00000503691.1/105379076, intron 1 of 1)	LINC02161
d35_high_control_vs_experiment	chr5_90264918_90265604	17.8870388700112	1.98506922374486	0.00117198116721052	0.0381585594457271	Exon (ENST00000669667.1/101929495, exon 2 of 2)	LINC01339
d35_high_control_vs_experiment	chr5_91741920_91743071	20.9014568613433	2.80013623048984	0.00107262291904875	0.036488354900657	Intron (ENST00000651690.1/105379078, intron 4 of 8)	LOC105379078
d35_high_control_vs_experiment	chr5_92378956_92379695	19.1456790079652	3.42426252386108	2.10396322488012e-06	0.00236028561029928	Intron (ENST00000507217.5/105379080, intron 2 of 3)	LOC105379080
d35_high_control_vs_experiment	chr5_92634709_92635674	27.0104565690219	3.25626650244025	5.22314065465605e-05	0.00910868467414351	Intron (ENST00000512210.5/105379082, intron 1 of 3)	LOC105379082
d35_high_control_vs_experiment	chr5_93429469_93430537	21.6533004825073	3.30233522494845	0.000863313672634267	0.0327081723517035	Promoter (2-3kb)	NR2F1-AS1
d35_high_control_vs_experiment	chr5_93603859_93604652	39.7225289314532	2.12785301501472	0.00116407698523166	0.0381008248756863	Distal Intergenic	NR2F1
d35_high_control_vs_experiment	chr5_95283719_95285730	129.071300887457	1.31858598403031	0.000401485424122802	0.022521549164646	Promoter (<=1kb)	MCTP1
d35_high_control_vs_experiment	chr5_95846884_95847381	21.1496627106017	2.03644894491515	6.62853743602442e-05	0.01006971689998	Intron (ENST00000656444.1/202299, intron 1 of 2)	LINC01554
d35_high_control_vs_experiment	chr5_96372868_96373714	18.4372793817536	3.49613333725928	1.82725986956915e-06	0.00211294492225371	Intron (ENST00000502645.2/101929710, intron 3 of 4)	PCSK1
d35_high_control_vs_experiment	chr5_97418379_97419073	16.5792666617893	4.03157788524758	4.56926509539243e-05	0.00856786060175289	Intron (ENST00000504578.2/101926893, intron 5 of 6)	LINC01340
d35_high_control_vs_experiment	chr5_97550118_97551037	24.5212245823758	2.44731488133553	0.000291920112633892	0.0193959359212976	Intron (ENST00000504012.1/102546227, intron 2 of 3)	LINC01340
d35_high_control_vs_experiment	chr6_100592795_100593513	20.3910997665849	2.31131581089543	0.00128947260340233	0.0399834919774042	Intron (ENST00000369162.7/10973, intron 34 of 41)	ASCC3
d35_high_control_vs_experiment	chr6_101597361_101598356	26.8765184724286	3.05124680735646	0.000273076572680252	0.0188131236426026	Intron (ENST00000683774.1/2898, intron 6 of 16)	GRIK2
d35_high_control_vs_experiment	chr6_101716486_101717371	30.3282130986286	2.95437029893251	0.00202837472414258	0.0493790170699163	Intron (ENST00000683774.1/2898, intron 11 of 16)	GRIK2
d35_high_control_vs_experiment	chr6_104471911_104472797	21.153544740081	2.45315157742677	0.00163238668033698	0.0445137430766488	Distal Intergenic	LOC105377918
d35_high_control_vs_experiment	chr6_104472837_104473563	18.0571874238885	2.55564799424426	1.55947309542015e-05	0.00556835612990581	Distal Intergenic	LOC105377918
d35_high_control_vs_experiment	chr6_104477359_104478185	22.3780688382558	3.01261917937044	0.000294533155936437	0.0194961235870299	Distal Intergenic	LOC105377918
d35_high_control_vs_experiment	chr6_104699610_104700282	38.2022558783932	2.14465425486024	0.000702340350388085	0.0295494371268971	Distal Intergenic	HACE1
d35_high_control_vs_experiment	chr6_105453153_105454445	29.6310703884614	2.90805842594013	0.000161790306643665	0.0146880425330569	Promoter (<=1kb)	PREP
d35_high_control_vs_experiment	chr6_107101907_107102747	16.1968192618904	2.03978130640506	0.000453651633766172	0.0237613874027526	Intron (ENST00000369042.6/57673, intron 1 of 3)	BEND3
d35_high_control_vs_experiment	chr6_109877405_109878323	23.7980274768402	2.74674410702695	0.000561794384807575	0.0263049603255164	3' UTR	NA
d35_high_control_vs_experiment	chr6_11035353_11036268	16.9156263087082	2.55350884756152	0.00027577963635495	0.0189213025262701	Intron (ENST00000354666.4/54898, intron 1 of 7)	ELOVL2-AS1
d35_high_control_vs_experiment	chr6_111667951_111668366	16.3834642625223	2.22073062789541	0.000582467849384423	0.0266673619229922	Intron (ENST00000538466.5/2534, intron 10 of 10)	FYN
d35_high_control_vs_experiment	chr6_111764375_111765220	30.5046264748589	2.52983023851751	0.000113361746521838	0.0126982895274928	Intron (ENST00000368682.7/2534, intron 3 of 13)	FYN
d35_high_control_vs_experiment	chr6_112436979_112437816	24.9054827022262	4.37039841167824	9.84591687668513e-07	0.00168362107706204	Distal Intergenic	LOC101927664
d35_high_control_vs_experiment	chr6_113317463_113318993	47.6894099939925	1.97715809886702	0.000314283331886505	0.0199441925793515	Distal Intergenic	LOC107986637
d35_high_control_vs_experiment	chr6_114342029_114343882	127.505038401124	1.11774104833634	0.00058280103525832	0.0266673619229922	Promoter (<=1kb)	HS3ST5
d35_high_control_vs_experiment	chr6_11687509_11688384	20.9971544931922	2.30856820256712	0.000552636271276877	0.0261488975384629	Distal Intergenic	ADTRP
d35_high_control_vs_experiment	chr6_117244648_117245496	30.8623357738213	2.18092762427033	9.84806873229431e-06	0.00456418883275358	Distal Intergenic	LOC105377964
d35_high_control_vs_experiment	chr6_118100737_118102347	84.2585016607268	2.27238271334425	0.00111922257652259	0.0372884834106134	Intron (ENST00000360388.9/222553, intron 1 of 7)	SLC35F1
d35_high_control_vs_experiment	chr6_118203498_118204257	24.7482270327633	4.40181532732498	2.65754158985821e-07	0.00075142078755357	Intron (ENST00000360388.9/222553, intron 2 of 7)	SLC35F1
d35_high_control_vs_experiment	chr6_119077711_119079396	173.820945949627	1.29973128023916	0.000126013508562937	0.0134252166369409	Promoter (<=1kb)	FAM184A
d35_high_control_vs_experiment	chr6_122995760_122997430	119.522324173647	1.63340429528532	0.000994546441396935	0.0352191269265004	Promoter (<=1kb)	CLVS2
d35_high_control_vs_experiment	chr6_123062098_123063133	24.7656921641488	2.72314897599815	0.00139693443050478	0.0415047295367991	Intron (ENST00000275162.10/134829, intron 5 of 5)	CLVS2
d35_high_control_vs_experiment	chr6_124254772_124255561	17.8430690598655	3.45956698657623	0.000473460797545878	0.0243326476550715	Intron (ENST00000368417.6/154215, intron 1 of 6)	NKAIN2
d35_high_control_vs_experiment	chr6_125316585_125317051	22.8100918719842	3.11157058082973	1.97061639286712e-05	0.006182275338099	Distal Intergenic	HDDC2
d35_high_control_vs_experiment	chr6_125421601_125422318	27.279416703128	1.78833871329014	0.00148165169640449	0.0425812712955084	Intron (ENST00000422227.2/102723341, intron 1 of 3)	LOC102723341
d35_high_control_vs_experiment	chr6_129267023_129268275	43.8560002954964	2.75738507146717	0.00062671215111984	0.0277138943944796	Exon (ENST00000617695.5/3908, exon 16 of 64)	LAMA2
d35_high_control_vs_experiment	chr6_129992801_129993435	18.4265543470136	2.88044951961487	0.00076614946244126	0.0308425444044564	Distal Intergenic	L3MBTL3
d35_high_control_vs_experiment	chr6_130794940_130795866	18.1844907552889	3.25445916078203	0.000713329320918492	0.0297806957190821	Distal Intergenic	SMLR1
d35_high_control_vs_experiment	chr6_132391639_132392740	52.2662064265704	4.58376961460726	1.10246464323552e-06	0.00174555126326975	3' UTR	MOXD1
d35_high_control_vs_experiment	chr6_13304523_13305419	20.136223928611	2.74069068312512	0.000870825584749486	0.0328621884880795	3' UTR	LOC100130357
d35_high_control_vs_experiment	chr6_134317367_134318256	41.9418871222861	1.41444027611383	0.000168716239970437	0.0148891073935035	Promoter (<=1kb)	SGK1
d35_high_control_vs_experiment	chr6_135180426_135181871	104.994887334094	1.10864505049294	0.000541392413431625	0.0259207107464594	Promoter (<=1kb)	MYB
d35_high_control_vs_experiment	chr6_135270773_135271794	47.7001634527021	2.29839766993875	0.00115664504772066	0.0379551772099124	Distal Intergenic	AHI1
d35_high_control_vs_experiment	chr6_136103717_136104679	37.1835027242423	1.60046758325827	0.00136742432877232	0.041067594403236	Intron (ENST00000308191.11/27115, intron 2 of 12)	LOC644135
d35_high_control_vs_experiment	chr6_136108180_136108795	17.1717707780404	3.1346307384143	0.000213919289150312	0.0166916913630361	Exon (ENST00000308191.11/27115, exon 3 of 13)	LOC644135
d35_high_control_vs_experiment	chr6_136502697_136503723	31.6806531441187	2.61417829375952	0.000466428504931968	0.0241306592232232	Intron (ENST00000617204.4/9053, intron 1 of 17)	MAP7
d35_high_control_vs_experiment	chr6_137431978_137432712	28.8876288125191	3.33442098131565	0.00015493643560907	0.0144940368205782	Distal Intergenic	OLIG3
d35_high_control_vs_experiment	chr6_138545233_138546317	56.4712825923528	1.77679450965265	0.000158516201737689	0.0146189865191522	Promoter (<=1kb)	NHSL1
d35_high_control_vs_experiment	chr6_139917951_139918716	32.0896460716852	3.17284105071434	0.000690110156488073	0.0292428931243234	Distal Intergenic	LINC02941
d35_high_control_vs_experiment	chr6_139920080_139920883	16.0876537055813	2.5779590243054	0.00046033357053889	0.0239693952169237	Distal Intergenic	LINC02941
d35_high_control_vs_experiment	chr6_140049765_140050825	48.6879547147474	2.47794473017243	0.000421604567814378	0.0229380045807805	Intron (ENST00000456896.6/100507477, intron 1 of 3)	LINC02941
d35_high_control_vs_experiment	chr6_140051622_140052550	21.8102474117724	3.34797820851166	9.00516713508398e-05	0.0115536899775777	Intron (ENST00000456896.6/100507477, intron 1 of 3)	LINC02941
d35_high_control_vs_experiment	chr6_140956801_140957963	56.6211438234068	3.80516248988787	1.15523053800222e-06	0.0017720411288284	Distal Intergenic	LOC102723724
d35_high_control_vs_experiment	chr6_142146853_142147687	144.505265398633	1.24258580736126	0.00204098752991797	0.0495168532927742	Promoter (<=1kb)	NMBR
d35_high_control_vs_experiment	chr6_142692838_142693498	26.0014770004719	1.7124245323008	0.00022973520630077	0.0173182327859472	Distal Intergenic	LOC153910
d35_high_control_vs_experiment	chr6_142900210_142901110	25.5776820920705	2.32787180785386	0.000487879555181102	0.0246633179431414	Intron (ENST00000012134.7/3097, intron 1 of 8)	HIVEP2
d35_high_control_vs_experiment	chr6_147447966_147448952	42.1494051658736	1.76237372197068	0.0020369089221278	0.0495146076518212	Distal Intergenic	SAMD5
d35_high_control_vs_experiment	chr6_148455834_148456545	25.4056367360691	2.34538506725901	0.00147357279115583	0.0425172418100768	Intron (ENST00000367467.8/23328, intron 4 of 19)	SASH1
d35_high_control_vs_experiment	chr6_150273643_150274325	20.5057042338321	3.11183036899054	0.000607363278054237	0.0272542939622398	Distal Intergenic	IYD
d35_high_control_vs_experiment	chr6_15404676_15405796	36.1227352340592	2.93068917615657	0.000179351515973505	0.0153059172911098	Intron (ENST00000341776.7/3720, intron 2 of 17)	JARID2
d35_high_control_vs_experiment	chr6_154122768_154123828	37.7288508770304	2.99843999445123	0.00100261933499996	0.0353799886229739	3' UTR	OPRM1
d35_high_control_vs_experiment	chr6_154139610_154140515	16.2984347347941	3.79867185727796	0.000105604253646997	0.0123540540307275	Intron (ENST00000524150.2/4988, intron 2 of 2)	OPRM1
d35_high_control_vs_experiment	chr6_156963825_156964399	19.2268024808455	1.77352645822614	0.000986608599576802	0.0350536369017686	Intron (ENST00000346085.10/57492, intron 6 of 20)	ARID1B
d35_high_control_vs_experiment	chr6_157228721_157229675	25.9360152466494	2.46285497391872	2.24625853628045e-05	0.00641864404376149	Distal Intergenic	ARID1B
d35_high_control_vs_experiment	chr6_161067520_161069024	28.3088586461427	1.9196383104357	0.0016019222046103	0.0442663520970668	Intron (ENST00000366919.6/4216, intron 3 of 25)	MAP3K4
d35_high_control_vs_experiment	chr6_163099130_163100230	32.3413192575369	2.31225408333039	0.000771555060394139	0.0309481101915878	Intron (ENST00000337019.7/135138, intron 5 of 6)	PACRG
d35_high_control_vs_experiment	chr6_16331357_16332500	56.4226617350097	1.44102702842404	0.00177441804725621	0.0465026835693497	Intron (ENST00000244769.8/6310, intron 7 of 8)	GMPR
d35_high_control_vs_experiment	chr6_165231531_165233146	49.077370181658	2.0365426380688	0.000877202463238686	0.0329697091353261	Distal Intergenic	C6orf118
d35_high_control_vs_experiment	chr6_169656538_169657229	19.4241383577482	2.90682076764095	0.000319547353244682	0.0200903203163976	Intron (ENST00000648086.1/253769, intron 3 of 7)	WDR27
d35_high_control_vs_experiment	chr6_23589904_23591172	43.6841372090442	2.6597140990584	0.0016241776184403	0.044448297923182	Distal Intergenic	LOC105374976
d35_high_control_vs_experiment	chr6_35047947_35049176	63.1682503013655	1.73659849816846	0.00114893247962092	0.0377928391682745	Intron (ENST00000360359.5/23294, intron 11 of 23)	ANKS1A
d35_high_control_vs_experiment	chr6_41555348_41556091	32.0586305791695	2.90965093758989	0.00128063486677242	0.0398069452127849	Intron (ENST00000307972.10/116113, intron 1 of 16)	FOXP4-AS1
d35_high_control_vs_experiment	chr6_41677160_41677995	20.8663400951202	2.27901335679117	0.000547572628590448	0.0259921866304827	Distal Intergenic	TFEB
d35_high_control_vs_experiment	chr6_4168942_4169746	22.9686743300782	2.67724061827378	4.2796625300354e-05	0.00845211181320656	Distal Intergenic	LOC102724096
d35_high_control_vs_experiment	chr6_46676897_46677682	17.8255999742091	2.87038086311552	0.00157303998396603	0.0438765666131353	3' UTR	TDRD6-AS1
d35_high_control_vs_experiment	chr6_47221428_47222115	26.4425763646471	3.97610268905798	6.08014237297417e-07	0.0012762460611567	Distal Intergenic	TNFRSF21
d35_high_control_vs_experiment	chr6_47308690_47310304	170.029087375295	1.10083881651512	0.000917780616573023	0.033705189920609	Promoter (<=1kb)	TNFRSF21
d35_high_control_vs_experiment	chr6_49409955_49410535	19.5561279187908	2.07798951836705	5.19936039173704e-05	0.00907774507419129	Distal Intergenic	MMUT
d35_high_control_vs_experiment	chr6_52731151_52732281	24.2835527114757	2.42765921757067	0.000242999245935214	0.0177573692654601	Distal Intergenic	GSTA2
d35_high_control_vs_experiment	chr6_55578453_55579513	104.157833905698	1.23449853055193	0.000168267599318795	0.0148833901444334	Promoter (<=1kb)	HMGCLL1
d35_high_control_vs_experiment	chr6_70955355_70957618	193.734106111826	1.23561384553733	0.000560873222309961	0.0262903857635625	Promoter (<=1kb)	B3GAT2
d35_high_control_vs_experiment	chr6_71288040_71289867	149.410279713426	1.32615649728497	0.0002347376464564	0.0174947628674062	Promoter (<=1kb)	OGFRL1
d35_high_control_vs_experiment	chr6_71886242_71887688	117.956057952047	1.51092778369139	0.000362333859635873	0.0214522551570266	Promoter (<=1kb)	RIMS1
d35_high_control_vs_experiment	chr6_72374738_72375305	21.0948518050184	2.44001745910034	0.00103820267920526	0.0359329285060032	Intron (ENST00000521978.6/22999, intron 29 of 33)	RIMS1
d35_high_control_vs_experiment	chr6_73259575_73260227	17.8992840510749	3.616818545285	0.000157091305023531	0.0145590323228497	Promoter (2-3kb)	KHDC1
d35_high_control_vs_experiment	chr6_75201850_75202531	36.9053375254236	1.0856089627253	0.00160072241444611	0.0442576047363641	Promoter (<=1kb)	COL12A1
d35_high_control_vs_experiment	chr6_75290432_75291319	31.9445418006743	2.57986756223747	6.93642344037535e-05	0.0102933647944168	Exon (ENST00000607221.3/100506804, exon 3 of 3)	TMEM30A-DT
d35_high_control_vs_experiment	chr6_75374731_75375501	27.3520144399174	2.903848599671	1.71447562872663e-05	0.00580182917404396	Intron (ENST00000625815.2/ENST00000625815.2, intron 2 of 4)	FILIP1
d35_high_control_vs_experiment	chr6_76539004_76539663	17.5159169378418	2.66228757512162	0.00200791197192916	0.0491195064573233	Intron (ENST00000653622.1/105377860, intron 2 of 2)	LINC02540
d35_high_control_vs_experiment	chr6_77368587_77369358	33.2373730309771	2.05192095469791	0.00132780383780825	0.0405118960662727	Distal Intergenic	HTR1B
d35_high_control_vs_experiment	chr6_79869539_79870065	37.7656653074505	1.63068376410021	0.00108891306574974	0.0367761978451652	Exon (ENST00000649312.1/ENST00000649312.1, exon 3 of 3)	LINC01621
d35_high_control_vs_experiment	chr6_81894787_81895443	24.0152888399962	2.72288055273828	0.00145272454783015	0.0422919875673362	Promoter (<=1kb)	LINC02542
d35_high_control_vs_experiment	chr6_8329187_8330032	22.1781136171575	3.07458247190454	0.000432296055845043	0.0232337878422975	Exon (ENST00000439891.3/105374910, exon 6 of 7)	LOC105374911
d35_high_control_vs_experiment	chr6_83707673_83709739	262.478079299791	1.70132243526494	0.000150907602464962	0.0143941392060812	Promoter (<=1kb)	SNAP91
d35_high_control_vs_experiment	chr6_87697567_87698184	37.0797964958887	2.20939569326102	0.00141703699854807	0.0417433052727294	Intron (ENST00000257787.6/55122, intron 1 of 4)	AKIRIN2
d35_high_control_vs_experiment	chr6_89689625_89690290	20.7070570338903	3.53211067170346	2.68990541770489e-06	0.00262571449296421	Promoter (2-3kb)	MDN1
d35_high_control_vs_experiment	chr6_91653724_91654745	34.0175223748165	2.26187659850804	0.000146660985312258	0.0142367938474051	Intron (ENST00000656997.1/ENST00000656997.1, intron 1 of 3)	CASC6
d35_high_control_vs_experiment	chr6_91669194_91670205	33.6741894885269	2.49691453442124	0.000268578556202253	0.0186600997387124	Exon (ENST00000656997.1/ENST00000656997.1, exon 1 of 4)	CASC6
d35_high_control_vs_experiment	chr6_93242006_93242575	17.1125603641231	2.79384748845637	0.00109133260700331	0.0368161263393116	3' UTR	EPHA7
d35_high_control_vs_experiment	chr6_93272174_93273598	68.2184710951867	2.90441935755956	0.00106109900489106	0.03629209895849	Exon (ENST00000369303.9/2045, exon 6 of 17)	EPHA7
d35_high_control_vs_experiment	chr6_93416576_93417703	110.907631948112	1.21188943309597	0.00146175253607822	0.0423959000551723	Promoter (<=1kb)	LOC105377899
d35_high_control_vs_experiment	chr6_96015043_96016848	169.953174484879	1.92689437590346	0.000300141227722012	0.0195858633374663	Promoter (<=1kb)	FUT9
d35_high_control_vs_experiment	chr6_96923999_96925384	165.812728263017	1.05560537870788	0.00152648329377478	0.0431656510791373	Promoter (<=1kb)	KLHL32
d35_high_control_vs_experiment	chr6_97096886_97097776	18.0897763858706	2.93837826618829	1.7924448605412e-05	0.00588317191399248	Intron (ENST00000536676.5/114792, intron 5 of 9)	KLHL32
d35_high_control_vs_experiment	chr6_98977523_98978516	35.7346781929159	4.68441632742086	7.14708889940537e-07	0.00141203499752135	Distal Intergenic	FBXL4
d35_high_control_vs_experiment	chr7_102306898_102307595	29.3284886554023	1.8078410203357	0.000952088130302461	0.0343302106470898	Intron (ENST00000617975.2/10603, intron 2 of 4)	MIR4285
d35_high_control_vs_experiment	chr7_106659780_106661510	236.469924401483	1.32518118763658	0.000110695474177605	0.0125889249554807	Promoter (<=1kb)	CCDC71L
d35_high_control_vs_experiment	chr7_107966573_107967220	18.7699621849079	2.23373559242079	0.00106019535379003	0.03629209895849	Intron (ENST00000393561.6/3912, intron 12 of 32)	LAMB1
d35_high_control_vs_experiment	chr7_108306979_108307815	33.5347690389867	5.10780588257114	4.10716342456616e-08	0.000350559638429447	Intron (ENST00000413765.6/4897, intron 3 of 30)	NRCAM
d35_high_control_vs_experiment	chr7_108603648_108604500	24.7196776814896	2.11196031994096	0.000612594013466213	0.0273583467243935	Promoter (1-2kb)	LOC105375448
d35_high_control_vs_experiment	chr7_110442268_110442904	22.9430998785179	3.2231012040247	9.43633535572694e-07	0.00168362107706204	Intron (ENST00000667232.1/105375451, intron 3 of 7)	LOC105375451
d35_high_control_vs_experiment	chr7_111082091_111082859	27.2762504289055	2.19061793616577	0.00146751524218537	0.0424622243095004	Intron (ENST00000405709.7/83943, intron 3 of 5)	LRRN3
d35_high_control_vs_experiment	chr7_111090826_111091523	45.2341699595019	1.60993448244685	0.000165081545673132	0.0147713591388771	Promoter (<=1kb)	LRRN3
d35_high_control_vs_experiment	chr7_111756519_111757295	39.659908770197	2.41623017053021	9.85510426399056e-05	0.0119824395091217	Exon (ENST00000660369.1/ENST00000660369.1, exon 1 of 3)	DOCK4
d35_high_control_vs_experiment	chr7_11204610_11205536	27.9930420486088	3.41194195394903	0.000259837869466956	0.0183080548334738	Intron (ENST00000625468.2/ENST00000625468.2, intron 3 of 4)	NA
d35_high_control_vs_experiment	chr7_112566456_112567412	18.0251731417969	2.50581004369544	0.00025295481931118	0.0181447325915013	Distal Intergenic	LOC100996249
d35_high_control_vs_experiment	chr7_114629815_114630981	60.7659010605356	3.21492271071592	0.000479100725365954	0.0244552857523386	Promoter (<=1kb)	FOXP2
d35_high_control_vs_experiment	chr7_114649448_114650258	31.3617124230442	4.4192072500109	6.85081809094458e-06	0.00385793505874815	Intron (ENST00000412402.5/93986, intron 12 of 19)	MIR3666
d35_high_control_vs_experiment	chr7_114656474_114657251	30.3966820863358	3.64347339270668	5.89849401355961e-05	0.00964843430455221	3' UTR	MIR3666
d35_high_control_vs_experiment	chr7_114659641_114660634	46.4851615744834	3.26676897245466	1.96753611563667e-05	0.006182275338099	Promoter (1-2kb)	FOXP2
d35_high_control_vs_experiment	chr7_115299382_115300646	36.3802372807224	2.56009152571316	0.001036634400947	0.0359142812450699	Distal Intergenic	LINC01392
d35_high_control_vs_experiment	chr7_115707261_115708364	45.0211839250616	4.56298221414246	3.11717883665757e-10	2.34294954310274e-05	Distal Intergenic	LOC100506489
d35_high_control_vs_experiment	chr7_117068422_117069191	61.0236499474997	3.92612764770128	9.79263064378647e-07	0.00168362107706204	Intron (ENST00000393446.6/7982, intron 1 of 13)	ST7-AS2
d35_high_control_vs_experiment	chr7_11742302_11743169	22.1284161698033	2.69324017438652	0.00110581386344663	0.0370303407432755	Intron (ENST00000423059.9/221981, intron 1 of 27)	THSD7A
d35_high_control_vs_experiment	chr7_117750655_117751384	24.1537461372459	3.06786523171921	0.00021222890005954	0.0166080971220281	Intron (ENST00000160373.8/83992, intron 12 of 22)	CTTNBP2
d35_high_control_vs_experiment	chr7_122299702_122300844	55.7731354924797	1.99559010003233	0.00151041274101581	0.042951398215456	Promoter (2-3kb)	FEZF1-AS1
d35_high_control_vs_experiment	chr7_122310203_122310988	62.513300029567	1.67675666199711	0.00190624253084098	0.0481155709082745	Promoter (<=1kb)	FEZF1
d35_high_control_vs_experiment	chr7_122467499_122468266	29.8612294048436	5.05916362188791	2.34765351513102e-07	0.00075142078755357	Intron (ENST00000449022.7/93664, intron 14 of 29)	CADPS2
d35_high_control_vs_experiment	chr7_123154132_123154715	20.1074178682563	1.39356189336827	0.00207599446776916	0.0499614119485346	Intron (ENST00000194130.7/6561, intron 6 of 14)	SLC13A1
d35_high_control_vs_experiment	chr7_128041888_128042433	21.4298331914734	2.79898378538401	0.00138362912980863	0.0412784679751714	Promoter (<=1kb)	SND1
d35_high_control_vs_experiment	chr7_128166615_128167968	83.9597815624036	1.55523699060838	4.5440927966571e-05	0.00855919481000795	Distal Intergenic	MIR129-1
d35_high_control_vs_experiment	chr7_129553924_129554561	18.0770285157443	2.71118222315191	0.000827538002890197	0.0320205020037243	Distal Intergenic	SMKR1
d35_high_control_vs_experiment	chr7_131493605_131494198	23.9129834913158	2.70389818713743	0.00150559115537452	0.0428976479210906	3' UTR	PODXL
d35_high_control_vs_experiment	chr7_134129900_134130610	23.6379200440048	3.480610832335	0.000405772465483615	0.0226033762529821	Promoter (2-3kb)	LRGUK
d35_high_control_vs_experiment	chr7_134283795_134284649	18.7913662512941	3.03006635127002	0.000972355509729602	0.0347975744648403	Exon (ENST00000420268.1/ENST00000420268.1, exon 1 of 2)	SLC35B4
d35_high_control_vs_experiment	chr7_136405978_136406678	23.8054544235218	1.45950753869434	0.00112472191578347	0.0373891689496129	Promoter (<=1kb)	LOC105375523
d35_high_control_vs_experiment	chr7_13724417_13725530	25.5769022617112	3.25297283520968	0.000220696762633816	0.016943943229279	Intron (ENST00000640300.1/105375161, intron 6 of 6)	LOC105375161
d35_high_control_vs_experiment	chr7_137305723_137306714	42.3984949244989	2.56571705955176	0.00173657335049093	0.0459882142932361	Intron (ENST00000348225.7/5764, intron 1 of 4)	LOC105375527
d35_high_control_vs_experiment	chr7_137354299_137355708	43.1428852225369	3.11396014174806	0.000583284789641099	0.0266673619229922	Exon (ENST00000438969.2/ENST00000438969.2, exon 1 of 4)	PTN
d35_high_control_vs_experiment	chr7_137820551_137821476	60.2181681723581	2.13554804900016	0.000518915170205857	0.0253430548931759	Intron (ENST00000453654.6/9162, intron 2 of 32)	DGKI
d35_high_control_vs_experiment	chr7_137846380_137847786	86.3395805838187	1.12237722409807	0.00187465538029745	0.0477371722473831	Promoter (<=1kb)	DGKI
d35_high_control_vs_experiment	chr7_139771304_139772158	22.9968661643706	2.68593863442567	0.00116467264517364	0.0381008248756863	Intron (ENST00000406875.8/28996, intron 1 of 14)	TBXAS1
d35_high_control_vs_experiment	chr7_140562705_140563524	24.4211128045171	3.75487410812303	1.89894064829992e-07	0.000714803822686498	Intron (ENST00000275884.10/27147, intron 8 of 18)	DENND2A
d35_high_control_vs_experiment	chr7_14194832_14195606	50.9808007385213	3.06977027567813	0.00201604998643136	0.0491757221690097	Intron (ENST00000399322.7/1607, intron 22 of 24)	DGKB
d35_high_control_vs_experiment	chr7_143360963_143363229	136.727662703195	1.4572054858494	5.7549106416756e-05	0.00955874255505098	Promoter (<=1kb)	FAM131B
d35_high_control_vs_experiment	chr7_143884958_143885630	87.9471305741566	1.34590794895324	0.00162016585959605	0.0443708203395476	Promoter (<=1kb)	TCAF1
d35_high_control_vs_experiment	chr7_14747484_14748703	24.6695283714809	2.5220250158932	0.000894359359134017	0.0332618927911482	Intron (ENST00000399322.7/1607, intron 3 of 24)	DGKB
d35_high_control_vs_experiment	chr7_148107226_148108239	34.2623462900398	4.32686175484274	7.65334456151504e-06	0.00405536332341814	Intron (ENST00000361727.8/26047, intron 15 of 23)	CNTNAP2
d35_high_control_vs_experiment	chr7_148982921_148984221	115.08693148142	1.06678198814082	0.00126118827195613	0.0395920708453036	Promoter (<=1kb)	RNY3
d35_high_control_vs_experiment	chr7_150564425_150565384	17.0241282923512	3.61993042509983	0.000158673095211355	0.0146190800778994	Promoter (1-2kb)	GIMAP4
d35_high_control_vs_experiment	chr7_150955446_150956542	36.1303687595704	1.44191846201113	0.00178538483123444	0.0466194154516792	Promoter (<=1kb)	KCNH2
d35_high_control_vs_experiment	chr7_150971171_150971871	25.3385116626889	2.03176479966962	1.75606247301419e-05	0.00584601376196071	Intron (ENST00000262186.10/3757, intron 2 of 14)	KCNH2
d35_high_control_vs_experiment	chr7_151138197_151138984	27.6651349378965	1.64446689472788	0.000226159785253711	0.0172051972258421	Promoter (<=1kb)	AGAP3
d35_high_control_vs_experiment	chr7_154304355_154305388	23.4177509291743	3.09444825745034	0.00163017723705052	0.0444931669648736	Promoter (<=1kb)	DPP6
d35_high_control_vs_experiment	chr7_158730694_158731389	17.0415244834793	3.1023793960939	0.000181279993954313	0.0153761956413756	3' UTR	ESYT2
d35_high_control_vs_experiment	chr7_158976567_158977455	24.5762142508002	2.369069733555	0.00199128878690137	0.0489758650017913	Distal Intergenic	LINC00689
d35_high_control_vs_experiment	chr7_158977790_158978823	20.5844972383148	3.04993073757671	0.00196746091192033	0.0487308525595626	Distal Intergenic	LINC00689
d35_high_control_vs_experiment	chr7_16648527_16649000	18.6263411265129	2.7194803916989	0.000119441054535565	0.0130035584678559	Promoter (2-3kb)	BZW2
d35_high_control_vs_experiment	chr7_16697675_16698584	26.5149391147264	2.77993347733017	0.000791178958668758	0.0312901807318814	3' UTR	BZW2
d35_high_control_vs_experiment	chr7_19708428_19709632	132.517613776908	1.07652862309783	0.00156592759298527	0.0437600585364928	Promoter (<=1kb)	POLR1F
d35_high_control_vs_experiment	chr7_19772360_19773925	91.3048485614477	1.51705925131253	7.67873926594238e-05	0.0108999667625381	Promoter (<=1kb)	TMEM196
d35_high_control_vs_experiment	chr7_20064597_20065861	43.6172350056043	1.91356680504473	0.00103386713842922	0.0358928585645203	Intron (ENST00000691231.1/101927668, intron 1 of 5)	LOC105375181
d35_high_control_vs_experiment	chr7_24199485_24201203	43.0705951580274	3.18031309289408	0.000200159446916687	0.0161169776397548	Intron (ENST00000439839.1/107986777, intron 1 of 1)	LOC107986777
d35_high_control_vs_experiment	chr7_2465780_2466427	21.7723502535462	2.81264076064203	0.00179049736454885	0.0466431847897247	Distal Intergenic	GRIFIN
d35_high_control_vs_experiment	chr7_24798106_24798853	20.661442351416	3.06088576419909	0.00200293214197096	0.0490615568261013	Promoter (2-3kb)	NA
d35_high_control_vs_experiment	chr7_25672317_25673000	17.3517116157568	3.33624982565677	0.000713031012722914	0.0297806957190821	Intron (ENST00000456777.6/646588, intron 1 of 3)	LINC03007
d35_high_control_vs_experiment	chr7_25732638_25733407	23.7015573585153	2.49543369419058	0.00150242356434798	0.0428505146482741	Intron (ENST00000456777.6/646588, intron 1 of 3)	LINC03007
d35_high_control_vs_experiment	chr7_31456666_31457653	23.338169662693	3.20725656145437	0.000339993225757119	0.020801579837989	Distal Intergenic	LOC105375224
d35_high_control_vs_experiment	chr7_31687009_31687585	19.1711115288142	2.04710788536309	0.000287055565699128	0.0192900792033367	Promoter (<=1kb)	PPP1R17
d35_high_control_vs_experiment	chr7_32611067_32612011	27.7128750657966	3.19631838948275	1.44951009093556e-05	0.00536168424920229	Intron (ENST00000417811.2/100129460, intron 17 of 21)	AVL9
d35_high_control_vs_experiment	chr7_34058380_34060170	74.5987031817928	4.04851848324912	1.18221573273178e-07	0.0005385350909785	Intron (ENST00000297161.6/168667, intron 11 of 15)	BMPER
d35_high_control_vs_experiment	chr7_35366334_35367217	23.5227970638495	3.05606530316039	4.73096289523331e-06	0.00323034453947536	Intron (ENST00000656715.1/401324, intron 2 of 2)	LOC401324
d35_high_control_vs_experiment	chr7_36037076_36037736	19.3981264954391	2.14036335359998	0.00144068383548525	0.0421067400027485	Intron (ENST00000446024.1/105375233, intron 3 of 3)	LOC105375233
d35_high_control_vs_experiment	chr7_36881174_36882106	18.6515849676131	4.54059256720885	4.10040498052545e-06	0.00299756971756247	Intron (ENST00000310758.9/9844, intron 18 of 21)	ELMO1
d35_high_control_vs_experiment	chr7_36985325_36987446	71.1030430587031	1.74219937183886	0.000146587909031434	0.0142367938474051	Promoter (<=1kb)	ELMO1
d35_high_control_vs_experiment	chr7_37436576_37437369	16.3316898336543	3.05146531210045	0.00206399144666603	0.0498264837353574	Intron (ENST00000310758.9/9844, intron 1 of 21)	ELMO1
d35_high_control_vs_experiment	chr7_40329577_40330391	18.6026409221675	2.62442415426732	0.000108697163461247	0.012501837105824	Intron (ENST00000401647.7/79783, intron 8 of 12)	SUGCT
d35_high_control_vs_experiment	chr7_40604560_40605355	28.5999542982747	1.81599553611903	0.00151844650488706	0.0430274214603482	Intron (ENST00000401647.7/79783, intron 11 of 12)	SUGCT-AS1
d35_high_control_vs_experiment	chr7_41130035_41131160	78.4421411456679	2.99444978006026	0.00160766810823835	0.0443407419195082	Exon (ENST00000665804.1/101928773, exon 4 of 5)	LINC01449
d35_high_control_vs_experiment	chr7_41693367_41694205	29.1530477070501	3.17815739339286	1.85826599690188e-05	0.00596888538427937	Promoter (<=1kb)	INHBA-AS1
d35_high_control_vs_experiment	chr7_45088370_45089990	208.590402771402	1.70458729679379	1.18660725312415e-05	0.00499654720800806	Promoter (<=1kb)	NACAD
d35_high_control_vs_experiment	chr7_46215693_46216520	40.735407766206	2.99721680811261	7.12556103310278e-05	0.0104502435346456	Distal Intergenic	NA
d35_high_control_vs_experiment	chr7_47428173_47429062	39.3859450362195	2.66179066898108	3.54283826719839e-05	0.00781968485985313	Exon (ENST00000311160.14/64759, exon 9 of 31)	TNS3
d35_high_control_vs_experiment	chr7_47480262_47481421	41.213232628005	2.49793194537329	7.52966559294761e-05	0.0108005437047695	Promoter (<=1kb)	TNS3
d35_high_control_vs_experiment	chr7_50531326_50532465	50.2676906271245	2.76531342786075	7.19587631641916e-06	0.00397691215906511	Promoter (<=1kb)	DDC-AS1
d35_high_control_vs_experiment	chr7_51289474_51290421	17.4225740646536	2.82036245136036	0.000839880812645857	0.0322820463208868	Intron (ENST00000265136.12/23242, intron 1 of 12)	COBL
d35_high_control_vs_experiment	chr7_55502189_55502975	17.9116683942118	3.52227436114925	3.75486367356578e-06	0.00289096525740721	Intron (ENST00000462326.5/81552, intron 2 of 4)	VOPP1
d35_high_control_vs_experiment	chr7_55526618_55527504	72.1492533469193	2.76127543183705	0.000625768920244471	0.0277138943944796	Promoter (<=1kb)	VOPP1
d35_high_control_vs_experiment	chr7_6536288_6537300	39.1624580410793	1.55775138112895	0.000564350561039186	0.0263302290776585	Promoter (<=1kb)	GRID2IP
d35_high_control_vs_experiment	chr7_78542500_78543814	47.1629955889249	3.5397686389136	0.00026452599856504	0.0185211321538378	Intron (ENST00000354212.9/9863, intron 3 of 21)	MAGI2
d35_high_control_vs_experiment	chr7_78578534_78579205	40.850219815175	3.06519554943575	0.00206103574923179	0.0498031183094789	Intron (ENST00000354212.9/9863, intron 3 of 21)	MAGI2
d35_high_control_vs_experiment	chr7_80127497_80128240	37.0604629342704	1.84196289855455	0.00169987914914924	0.045510099938613	Intron (ENST00000649225.1/2770, intron 4 of 12)	GNAI1
d35_high_control_vs_experiment	chr7_80821757_80822367	18.6811816761209	2.75420482581032	0.000618165565489724	0.0275335521873312	Intron (ENST00000265361.8/10512, intron 4 of 17)	SEMA3C
d35_high_control_vs_experiment	chr7_80833525_80834343	27.8922337741148	2.19778355548508	0.000704067366219488	0.0295866780587609	Intron (ENST00000265361.8/10512, intron 2 of 17)	SEMA3C
d35_high_control_vs_experiment	chr7_8146539_8147525	46.0076126598185	2.37049902996207	0.000414346824615778	0.0227905914417735	Intron (ENST00000402384.8/3382, intron 8 of 13)	ICA1
d35_high_control_vs_experiment	chr7_82319486_82320200	43.5202815321265	3.45447123027755	6.28690383030991e-05	0.00988445655827738	Intron (ENST00000356860.8/781, intron 3 of 38)	CACNA2D1
d35_high_control_vs_experiment	chr7_82373911_82374625	22.1569146717675	3.07747900650351	0.000253661389929606	0.0181452682138522	Intron (ENST00000356860.8/781, intron 1 of 38)	CACNA2D1
d35_high_control_vs_experiment	chr7_82375422_82376097	16.9595105225024	1.92051334898625	0.00198605190223151	0.0489374085620319	Intron (ENST00000356860.8/781, intron 1 of 38)	CACNA2D1
d35_high_control_vs_experiment	chr7_83451521_83452635	26.9592344372539	2.61012019096058	3.36477819889355e-06	0.0027945319488877	Intron (ENST00000643230.2/9723, intron 4 of 16)	SEMA3E
d35_high_control_vs_experiment	chr7_8381991_8382684	20.7829060017299	2.70707381218986	0.000343964173922862	0.0209507351883932	Distal Intergenic	NXPH1
d35_high_control_vs_experiment	chr7_84150102_84151006	58.4779879264111	1.56056671849555	0.00073555543347074	0.0302440838447727	Intron (ENST00000265362.9/10371, intron 1 of 16)	SEMA3A
d35_high_control_vs_experiment	chr7_8433357_8434897	93.3628101159473	1.18407687720333	0.0018762869939219	0.0477371722473831	Promoter (<=1kb)	NXPH1
d35_high_control_vs_experiment	chr7_87058724_87060219	190.134900271048	1.55150576160075	6.1411484375147e-05	0.00981050094441443	Promoter (<=1kb)	ELAPOR2
d35_high_control_vs_experiment	chr7_87627547_87629291	226.683810591538	1.28602693553797	0.00112706335379875	0.0374168164368159	Promoter (<=1kb)	RUNDC3B
d35_high_control_vs_experiment	chr7_87933630_87935338	228.530196258865	1.42356596291091	0.000150899564562999	0.0143941392060812	Promoter (<=1kb)	ADAM22
d35_high_control_vs_experiment	chr7_90224006_90224804	23.0825836551244	2.69157240422686	7.72061029897289e-06	0.00405536332341814	Intron (ENST00000428074.5/261729, intron 1 of 2)	STEAP2
d35_high_control_vs_experiment	chr7_90677678_90678493	22.8320336578799	2.22122357456375	0.00012965921152778	0.0136231585716239	Intron (ENST00000449528.5/5218, intron 5 of 7)	CDK14
d35_high_control_vs_experiment	chr7_91294774_91295712	21.4853060814505	3.30918105205399	0.00016283278320251	0.0147247287239186	Distal Intergenic	LINC02932
d35_high_control_vs_experiment	chr7_92754818_92755630	17.1873736499474	2.72217430709251	0.000731040946067561	0.0301261275572528	Intron (ENST00000265734.8/1021, intron 3 of 7)	CDK6
d35_high_control_vs_experiment	chr7_94439846_94440705	18.0736527445179	1.92668311707581	0.000801055309756125	0.0315314583501151	Distal Intergenic	COL1A2
d35_high_control_vs_experiment	chr7_94655757_94656571	77.3044370975814	1.24612276565096	0.000422439618562377	0.022958508915542	Promoter (<=1kb)	PEG10
d35_high_control_vs_experiment	chr7_95246761_95247499	27.2709484637413	2.43293008634873	3.09323946119848e-06	0.00275591225293767	Exon (ENST00000433360.6/55607, exon 9 of 20)	PPP1R9A-AS1
d35_high_control_vs_experiment	chr7_95478240_95479230	29.9580349694349	1.96319387106293	0.0016016428845143	0.0442663520970668	Promoter (<=1kb)	ASB4
d35_high_control_vs_experiment	chr7_96546948_96547998	18.9551955043601	2.89022415184291	0.00137819255271181	0.0412620584517832	Intron (ENST00000466986.5/7979, intron 2 of 3)	SEM1
d35_high_control_vs_experiment	chr7_98801862_98802565	44.2498850393372	2.21782833680614	0.00039951537867573	0.0224809554017487	Distal Intergenic	TMEM130
d35_high_control_vs_experiment	chr8_101080013_101081330	101.905730696368	1.36997999914604	0.000698939597935456	0.0294721164262686	Distal Intergenic	FLJ42969
d35_high_control_vs_experiment	chr8_101097248_101098119	32.162274790736	2.44312432203543	1.82132715620149e-05	0.0059390673482861	Distal Intergenic	FLJ42969
d35_high_control_vs_experiment	chr8_102794684_102795556	22.5327571764421	2.1638127823445	8.47854886021867e-05	0.0112990944806061	Distal Intergenic	GASAL1
d35_high_control_vs_experiment	chr8_107358076_107358814	22.9937797356421	2.99973271402254	0.00107780047912885	0.0366025197712205	Intron (ENST00000517746.6/284, intron 1 of 8)	ANGPT1
d35_high_control_vs_experiment	chr8_107494906_107496171	52.5678603857529	2.36173324246115	4.81601107671807e-05	0.008741455107886	Promoter (<=1kb)	ANGPT1
d35_high_control_vs_experiment	chr8_108402607_108403256	16.5634165484573	2.91546801013658	0.00052881437111827	0.0256680724373116	Intron (ENST00000677409.1/3646, intron 1 of 13)	LOC105375704
d35_high_control_vs_experiment	chr8_109607279_109608609	105.172977038463	2.33240872285527	0.00197128721176823	0.0487671378471713	Promoter (<=1kb)	SYBU
d35_high_control_vs_experiment	chr8_112267501_112268747	28.2624920207755	3.09742560218429	0.000173324247875131	0.0150519743280352	Intron (ENST00000343508.7/114788, intron 60 of 71)	CSMD3
d35_high_control_vs_experiment	chr8_112673481_112674238	36.5509248699992	3.57408972173551	1.42321390057312e-05	0.00531337499641346	Intron (ENST00000343508.7/114788, intron 17 of 71)	CSMD3
d35_high_control_vs_experiment	chr8_113201824_113202609	24.9560327574993	3.65138860755941	7.00614136311296e-05	0.0103254725530388	Intron (ENST00000343508.7/114788, intron 4 of 71)	CSMD3
d35_high_control_vs_experiment	chr8_115448110_115448748	16.4249991798656	3.2400339332876	0.001058649072758	0.036281235847566	Intron (ENST00000640765.1/7227, intron 4 of 5)	TRPS1
d35_high_control_vs_experiment	chr8_117044377_117045183	31.2805618081395	1.63127441011551	0.000923986643387288	0.0337869842294318	Intron (ENST00000521243.5/169026, intron 2 of 9)	SLC30A8
d35_high_control_vs_experiment	chr8_121545887_121546833	23.2731494897709	2.93431709277758	8.97213988636457e-08	0.000501126962521145	Distal Intergenic	HAS2-AS1
d35_high_control_vs_experiment	chr8_123018881_123019772	17.5943980963353	2.57139635928477	0.000596139432135014	0.0269648811102248	Exon (ENST00000259512.9/79139, exon 7 of 8)	DERL1
d35_high_control_vs_experiment	chr8_123033625_123034366	32.0035523004513	2.68929092312108	0.00127596332319316	0.0397449619890203	Promoter (2-3kb)	DERL1
d35_high_control_vs_experiment	chr8_123939718_123940464	16.4002625431359	1.89693638237279	0.000645690623720005	0.0282407457115827	Intron (ENST00000522917.5/654463, intron 1 of 40)	FER1L6
d35_high_control_vs_experiment	chr8_124197092_124197685	16.2106606174599	2.84542790088416	0.000503605123152553	0.0249723413199065	Intron (ENST00000523703.1/101927588, intron 2 of 2)	FER1L6-AS2
d35_high_control_vs_experiment	chr8_124561433_124562208	45.2467603992736	2.21383040906107	0.000459633711370043	0.0239412465910263	Promoter (1-2kb)	MTSS1
d35_high_control_vs_experiment	chr8_124597464_124598020	16.2373551070032	2.64827989340469	0.00150890023320206	0.0429349664122848	Intron (ENST00000518547.6/9788, intron 3 of 13)	MTSS1
d35_high_control_vs_experiment	chr8_12753789_12756186	375.440496179862	1.19561189905378	0.00155187360187365	0.0435573707392069	Promoter (<=1kb)	LONRF1
d35_high_control_vs_experiment	chr8_12950238_12952544	124.001439178277	1.17528811944894	0.00100437350933359	0.0354252575763896	Promoter (<=1kb)	TRMT9B
d35_high_control_vs_experiment	chr8_130015262_130017289	96.92178038891	1.07473030977393	0.00142195837877179	0.0418244180205648	Promoter (<=1kb)	CYRIB
d35_high_control_vs_experiment	chr8_130357354_130359216	192.392707530576	1.36320902953575	0.000365839452983168	0.0215750552254589	3' UTR	ASAP1
d35_high_control_vs_experiment	chr8_132413547_132414602	55.3562994470581	3.11365985943759	3.06891391617542e-06	0.00275591225293767	Intron (ENST00000388996.10/3786, intron 1 of 14)	KCNQ3
d35_high_control_vs_experiment	chr8_132486434_132487428	49.2219498146742	3.47477316875724	0.000124620685556221	0.0133525335397283	Distal Intergenic	KCNQ3
d35_high_control_vs_experiment	chr8_134521134_134521950	22.7797677510113	2.46131461465103	0.00188642696253317	0.0478772806251558	Intron (ENST00000520356.5/57623, intron 12 of 13)	ZFAT
d35_high_control_vs_experiment	chr8_13558805_13559820	21.3270208402525	5.08081067154295	2.6992664246062e-07	0.00075142078755357	Exon (ENST00000529018.1/10395, exon 2 of 2)	C8orf48
d35_high_control_vs_experiment	chr8_140098036_140099582	141.178412154365	1.67318185817801	0.000147198407920815	0.0142574746589539	Promoter (<=1kb)	PEG13
d35_high_control_vs_experiment	chr8_140141655_140142652	49.7464435363968	2.70162902871641	0.00079918434988025	0.0314907961718869	Intron (ENST00000438773.4/83696, intron 17 of 22)	PEG13
d35_high_control_vs_experiment	chr8_140704242_140705060	37.3248948857794	2.69118348503555	0.00109181862994823	0.0368161263393116	Promoter (1-2kb)	PTK2
d35_high_control_vs_experiment	chr8_15236762_15237777	53.3603431808449	1.58281272979322	7.82627612902967e-05	0.0109746731258991	Promoter (<=1kb)	SGCZ
d35_high_control_vs_experiment	chr8_16460949_16461602	17.5851966396372	2.709812816826	0.00182494168684798	0.0471804649906094	Intron (ENST00000518026.5/4481, intron 2 of 5)	LOC101929028
d35_high_control_vs_experiment	chr8_16477330_16477996	17.0512016893326	2.66873711084377	0.00192447266050969	0.0482965530369147	Intron (ENST00000518026.5/4481, intron 2 of 5)	LOC101929028
d35_high_control_vs_experiment	chr8_17412517_17414156	177.39594903074	1.28521650009166	2.61012901353789e-05	0.0066788375233606	Promoter (<=1kb)	MTMR7
d35_high_control_vs_experiment	chr8_18197037_18197896	21.4872307514415	2.06441723423006	0.000153691871868785	0.0144308123914273	Intron (ENST00000517441.5/9, intron 2 of 4)	NAT1
d35_high_control_vs_experiment	chr8_19095554_19096715	44.773442398292	2.06866159170452	0.00108268910763142	0.0366624684969588	Exon (ENST00000660401.1/105379301, exon 2 of 4)	LOC105379301
d35_high_control_vs_experiment	chr8_27261447_27262095	31.2917096408261	2.00737347546081	0.000637397320423209	0.028024788590997	Distal Intergenic	STMN4
d35_high_control_vs_experiment	chr8_30975047_30975975	19.987015899734	3.40573093269434	3.27759154109513e-05	0.00747892320710029	Distal Intergenic	PURG
d35_high_control_vs_experiment	chr8_33564920_33565465	27.9137048582282	2.66106979590454	7.81151610211179e-05	0.0109730679967804	Promoter (1-2kb)	RNF122
d35_high_control_vs_experiment	chr8_33805215_33806401	60.0147275320602	2.1684875819104	5.06364642999874e-06	0.00328444885548118	Exon (ENST00000517292.2/105379364, exon 3 of 3)	LOC105379364
d35_high_control_vs_experiment	chr8_34999794_35000526	25.174194434785	3.13070697446581	0.00121858058878734	0.03891717166124	Distal Intergenic	LOC105379369
d35_high_control_vs_experiment	chr8_35939968_35940941	26.9872111546046	2.74529801398487	0.00088554768698206	0.033097950284828	Intron (ENST00000523748.2/ENST00000523748.2, intron 3 of 5)	NA
d35_high_control_vs_experiment	chr8_37020086_37021035	35.2395046636245	2.75797906996568	0.000154143908517606	0.0144642216279083	Distal Intergenic	LOC105379377
d35_high_control_vs_experiment	chr8_38712557_38713434	34.526451861801	1.72979299259307	0.00198044021153058	0.0488909014949428	Distal Intergenic	TACC1
d35_high_control_vs_experiment	chr8_40895126_40895694	19.981462012848	2.50512912436451	0.00154551035781309	0.0434682967004825	Promoter (2-3kb)	ZMAT4
d35_high_control_vs_experiment	chr8_41249409_41250187	31.8960249924968	2.32401812086274	0.000127733816977739	0.0135281048611207	Distal Intergenic	MIR548AO
d35_high_control_vs_experiment	chr8_41341680_41343441	106.703269662669	2.58674200623367	0.000132567891430977	0.0137436332961115	Distal Intergenic	SFRP1
d35_high_control_vs_experiment	chr8_48699492_48700174	26.235787249163	3.09911777973262	0.000251051966645361	0.0180744190066877	Distal Intergenic	CLXN
d35_high_control_vs_experiment	chr8_50643063_50643927	34.7999021013075	3.22738797698657	0.000961135470087851	0.0345683801737578	Promoter (<=1kb)	SNTG1
d35_high_control_vs_experiment	chr8_52173608_52174929	16.2498284574031	2.964270526567	0.000377803655646986	0.0218519948192125	Intron (ENST00000689386.1/9705, intron 9 of 25)	LOC101929341
d35_high_control_vs_experiment	chr8_52292062_52293143	25.3068397246531	3.62775694451394	2.25859681384493e-05	0.00641864404376149	Intron (ENST00000689386.1/9705, intron 2 of 25)	ST18
d35_high_control_vs_experiment	chr8_53250494_53251954	55.9474573601203	1.47831954163807	7.13846622005506e-05	0.0104589662234871	Promoter (<=1kb)	OPRK1
d35_high_control_vs_experiment	chr8_55100980_55103301	322.152557177422	1.26455857857357	0.00103932395239715	0.0359329285060032	Promoter (<=1kb)	XKR4
d35_high_control_vs_experiment	chr8_55520751_55521389	37.5694269456413	1.61269666689669	0.000495677488579116	0.0248210254732364	Promoter (<=1kb)	XKR4-AS1
d35_high_control_vs_experiment	chr8_55892770_55893836	17.9491411532463	2.28497850980354	0.000254766199975914	0.0181694112186332	Exon (ENST00000518552.2/ENST00000518552.2, exon 1 of 2)	SNORA1B
d35_high_control_vs_experiment	chr8_60997005_60997733	18.4312586648982	2.86688110190022	1.11434573465022e-05	0.00484823789608913	Distal Intergenic	LOC100130298
d35_high_control_vs_experiment	chr8_63286431_63287423	18.9437312252283	3.20615657034113	0.000155740318099299	0.014514360395708	Distal Intergenic	YTHDF3
d35_high_control_vs_experiment	chr8_63565510_63566433	35.0019208376822	4.63219732760806	1.01313756622071e-07	0.000507666348807096	Distal Intergenic	LOC102724612
d35_high_control_vs_experiment	chr8_64266628_64267361	38.0100053900958	3.11385658627515	0.000507760269930709	0.0250754797034052	Intron (ENST00000523191.5/102724623, intron 1 of 5)	LINC01414
d35_high_control_vs_experiment	chr8_66368118_66369224	35.3334392247262	2.63032501681779	0.000271908049740322	0.0187817934562376	Intron (ENST00000659008.1/102724687, intron 1 of 1)	RRS1-DT
d35_high_control_vs_experiment	chr8_69832399_69835331	234.224071844888	1.19353008513026	0.00121642559144942	0.0388813899712172	Promoter (<=1kb)	NA
d35_high_control_vs_experiment	chr8_69924596_69925257	17.5240938159036	3.12578038034543	0.00084186602126068	0.0323252898201818	Distal Intergenic	SLCO5A1
d35_high_control_vs_experiment	chr8_72536364_72538424	196.713149354896	1.71664242634393	0.000110240658453411	0.0125889249554807	Promoter (<=1kb)	KCNB2
d35_high_control_vs_experiment	chr8_72734568_72735379	20.3302329742686	3.37079996645092	0.000236806040826243	0.0175829331350487	Promoter (2-3kb)	LOC101926908
d35_high_control_vs_experiment	chr8_73001701_73002476	25.0754543965063	3.09402212470148	0.000890060844941007	0.0332148760532561	Distal Intergenic	TERF1
d35_high_control_vs_experiment	chr8_74048379_74049285	19.4538255764679	1.98408141346786	0.00111431428736974	0.0371994881742963	Exon (ENST00000391046.1/ENST00000391046.1, exon 1 of 1)	LY96
d35_high_control_vs_experiment	chr8_74320315_74322100	150.471159984169	1.33979901344038	0.00161930834972773	0.0443708203395476	Promoter (<=1kb)	GDAP1
d35_high_control_vs_experiment	chr8_74785996_74787350	41.8638226736533	4.03755827630494	4.72285737573571e-05	0.00871738385327586	Intron (ENST00000523442.5/441355, intron 6 of 6)	PI15
d35_high_control_vs_experiment	chr8_76402983_76404918	75.6200981476522	3.31733571020547	3.92336239313158e-05	0.00812368390836784	Promoter (<=1kb)	LINC01109
d35_high_control_vs_experiment	chr8_79612475_79613617	72.4522336024662	2.15327367139612	9.21466589267242e-06	0.00441360588000101	Promoter (<=1kb)	STMN2
d35_high_control_vs_experiment	chr8_80727070_80727942	58.1087819891869	2.37454495053899	9.63865857551756e-08	0.000501126962521145	Intron (ENST00000519936.2/619279, intron 2 of 8)	ZNF704
d35_high_control_vs_experiment	chr8_81279980_81281782	148.240932245569	1.05387860013267	0.00143874963661244	0.0421067400027485	Promoter (<=1kb)	FABP5
d35_high_control_vs_experiment	chr8_81369405_81370289	42.562673127488	4.5231275616029	2.3394120041448e-07	0.00075142078755357	Distal Intergenic	PMP2
d35_high_control_vs_experiment	chr8_81997404_81998420	42.9234706165909	3.33207401190843	6.45845381086967e-05	0.0099576109653229	Distal Intergenic	LOC105375931
d35_high_control_vs_experiment	chr8_8334168_8334825	18.0492943927602	3.67885346641768	1.30818083835504e-05	0.00516147728413967	Intron (ENST00000622241.1/157285, intron 3 of 4)	PRAG1
d35_high_control_vs_experiment	chr8_8664446_8666117	57.5342452313206	2.0673303091547	0.00128418016224796	0.039860496157325	Exon (ENST00000664885.1/ENST00000664885.1, exon 1 of 2)	CLDN23
d35_high_control_vs_experiment	chr8_8860440_8861109	18.6388209548911	2.41769686851037	0.0015001777946599	0.0428419142329762	Promoter (<=1kb)	MFHAS1
d35_high_control_vs_experiment	chr8_89772981_89773685	18.7001348368306	4.27241027162174	1.60899818405045e-05	0.00563188912925715	Intron (ENST00000522965.1/8767, intron 5 of 9)	RIPK2
d35_high_control_vs_experiment	chr8_89848224_89849035	29.4396199659449	1.94268263210382	0.00205721808810081	0.0497501354408243	Distal Intergenic	OSGIN2
d35_high_control_vs_experiment	chr8_92051448_92052133	24.5485363535674	3.03322213872874	2.71363296693473e-05	0.00675143047070947	Intron (ENST00000613886.4/862, intron 2 of 11)	RUNX1T1
d35_high_control_vs_experiment	chr8_92062417_92062905	16.954188169739	2.94751021924969	0.000331437085200875	0.020520296471508	Promoter (<=1kb)	RUNX1T1
d35_high_control_vs_experiment	chr8_92466735_92467889	25.9971812170848	2.93122573295722	4.00305121218962e-05	0.00823199279716012	Exon (ENST00000648652.1/105375639, exon 10 of 14)	LOC105375638
d35_high_control_vs_experiment	chr8_95167008_95167998	26.8159413340794	2.34427223584926	0.00038431831946392	0.0220506302951961	Distal Intergenic	PLEKHF2
d35_high_control_vs_experiment	chr8_95174227_95174979	26.4649001646057	3.45035273543795	2.94831248756957e-05	0.00706866147837155	Distal Intergenic	CFAP418-AS1
d35_high_control_vs_experiment	chr8_98293462_98294633	63.6634923381172	1.42871801774095	0.00107827353041968	0.0366025197712205	Promoter (<=1kb)	NIPAL2
d35_high_control_vs_experiment	chr9_101443295_101443834	16.8933566614758	2.49230341970734	0.00143877393394613	0.0421067400027485	Promoter (<=1kb)	ALDOB
d35_high_control_vs_experiment	chr9_105173170_105173865	16.9221378709666	2.17482918056272	0.000212985651875848	0.0166322431783048	Intron (ENST00000666856.1/112268038, intron 6 of 7)	LOC112268038
d35_high_control_vs_experiment	chr9_106934506_106935353	18.9138394182861	3.54715387052182	4.97340955680275e-05	0.00891093911354438	Promoter (1-2kb)	ZNF462
d35_high_control_vs_experiment	chr9_11319454_11320098	18.0459824720297	2.37050424320236	0.000185940294705887	0.0155912913720091	Intron (ENST00000657567.1/ENST00000657567.1, intron 1 of 3)	LOC105375974
d35_high_control_vs_experiment	chr9_120202695_120203892	27.6216386608265	2.15096492422975	0.00152404480148837	0.043112915841878	Distal Intergenic	MIR147A
d35_high_control_vs_experiment	chr9_13244076_13244921	33.232670022217	4.97975878989423	5.27804572973195e-08	0.000364941122556555	Intron (ENST00000319217.12/8777, intron 3 of 46)	MPDZ
d35_high_control_vs_experiment	chr9_13443368_13444344	20.334712984873	2.35232605058664	0.00206276600443091	0.0498127803963325	Promoter (2-3kb)	LOC105375977
d35_high_control_vs_experiment	chr9_13568471_13570003	28.9487716363546	1.66597993726516	0.00036796107296847	0.0216238265418238	Intron (ENST00000664438.1/105375977, intron 2 of 2)	LINC01235
d35_high_control_vs_experiment	chr9_14692653_14693982	89.0812216973419	1.08990583585248	0.000923091483445459	0.0337851131789454	Promoter (<=1kb)	ZDHHC21
d35_high_control_vs_experiment	chr9_16417098_16418118	29.6703655593257	3.06159229701367	0.000518229131341273	0.0253262893965893	3' UTR	LINC03041
d35_high_control_vs_experiment	chr9_16710688_16711619	36.8310713686037	2.83844363750137	8.05023892170514e-05	0.0110745244542153	Intron (ENST00000380672.9/54796, intron 3 of 6)	BNC2
d35_high_control_vs_experiment	chr9_17017624_17018642	27.2727355181352	3.45019873425718	0.000123188989351326	0.0132368726406277	Promoter (<=1kb)	LOC105375983
d35_high_control_vs_experiment	chr9_17323044_17323973	30.6172430199725	3.52728063806459	0.000262619973911076	0.0184650830580835	Intron (ENST00000380647.8/54875, intron 8 of 25)	CNTLN
d35_high_control_vs_experiment	chr9_17905818_17907750	89.028549614075	1.57994528328618	0.00127777066486478	0.0397765324489123	Promoter (<=1kb)	ADAMTSL1
d35_high_control_vs_experiment	chr9_20954665_20955712	19.2521429266834	3.92345512910188	5.47312866232353e-05	0.00936004625897365	Promoter (2-3kb)	FOCAD
d35_high_control_vs_experiment	chr9_2359699_2360528	21.459015919096	3.0102001716812	0.000228775788270779	0.0172939388347817	Distal Intergenic	LOC101930053
d35_high_control_vs_experiment	chr9_23820580_23822113	133.626615611041	1.19849869847543	0.0015556504521617	0.0436293198173896	Promoter (<=1kb)	ELAVL2
d35_high_control_vs_experiment	chr9_2420400_2421057	18.9683622029988	3.07875306083889	0.000721126140470268	0.0299208631151513	Distal Intergenic	LOC101930053
d35_high_control_vs_experiment	chr9_2620814_2623838	300.185040894532	1.08697285415137	0.000562185441509412	0.0263049603255164	Promoter (<=1kb)	LOC101930053
d35_high_control_vs_experiment	chr9_27353316_27354266	53.279721464701	4.27070447652762	2.21161303568114e-06	0.0024445641881527	Intron (ENST00000262244.6/79817, intron 3 of 3)	EQTN
d35_high_control_vs_experiment	chr9_34510284_34511066	29.955107526505	1.46208050392954	0.000580282950478965	0.0266598516292024	Promoter (2-3kb)	DNAI1
d35_high_control_vs_experiment	chr9_36864576_36865326	56.6149506761136	3.49377753836227	9.96567788691126e-07	0.00168362107706204	Promoter (<=1kb)	MIR4540
d35_high_control_vs_experiment	chr9_37676291_37677083	26.2214480110185	2.40367946232173	0.000132171366208285	0.0137119811078402	Intron (ENST00000377765.8/22844, intron 1 of 15)	FRMPD1
d35_high_control_vs_experiment	chr9_37913494_37914158	42.6299394235369	1.10482077053755	0.00177338978567368	0.0464838394998075	Intron (ENST00000540557.1/6461, intron 6 of 11)	SLC25A51
d35_high_control_vs_experiment	chr9_37916626_37917374	19.8388171120865	2.47160669371959	0.00173144209571488	0.0459658042018646	3' UTR	SLC25A51
d35_high_control_vs_experiment	chr9_37923892_37924522	26.8800216762059	3.90436801518909	1.10156312526773e-05	0.00482776900308662	Intron (ENST00000540557.1/6461, intron 6 of 11)	SLC25A51
d35_high_control_vs_experiment	chr9_39809267_39810305	85.8607412635533	1.46337945219595	0.000267490504559924	0.0186245993969294	Promoter (<=1kb)	GLIDR
d35_high_control_vs_experiment	chr9_4081186_4082365	17.2777988720551	2.15817261819969	0.000734636455252684	0.0302311046087763	Promoter (<=1kb)	GLIS3
d35_high_control_vs_experiment	chr9_41643443_41644722	29.1131936675899	4.45365084724674	1.68455378821173e-10	2.34294954310274e-05	Exon (ENST00000672905.1/ENST00000672905.1, exon 1 of 1)	LOC101928906
d35_high_control_vs_experiment	chr9_5557904_5558670	18.0098215490385	3.94587180525251	9.61053328153809e-06	0.00453377482657643	Intron (ENST00000397747.5/80380, intron 5 of 6)	PDCD1LG2
d35_high_control_vs_experiment	chr9_6557786_6558673	41.1176502528218	3.14371020752816	0.000683226625069303	0.0290778174098482	Promoter (2-3kb)	GLDC
d35_high_control_vs_experiment	chr9_69671639_69673469	217.007839318032	1.1755638961149	4.14399637769458e-05	0.00838423972828503	Promoter (<=1kb)	APBA1
d35_high_control_vs_experiment	chr9_7210817_7211635	19.7998207982354	2.13519437612465	0.000761561739040874	0.0307740765897801	Distal Intergenic	LOC105375969
d35_high_control_vs_experiment	chr9_7266805_7267795	82.8051151406292	2.73238236991524	0.00198341737276491	0.0489309144908989	Distal Intergenic	LOC105375970
d35_high_control_vs_experiment	chr9_72680311_72681527	57.1378024239476	4.28793977352492	1.0041382691337e-08	0.000124552813112774	Intron (ENST00000297784.10/117531, intron 5 of 23)	TMC1
d35_high_control_vs_experiment	chr9_72856829_72857390	17.6516108194875	2.41802481248438	0.000404680901911039	0.0225811642835104	Distal Intergenic	LINC01474
d35_high_control_vs_experiment	chr9_73548045_73548771	23.7263647793099	2.82599764275767	0.000735387841134902	0.0302440838447727	Exon (ENST00000667966.1/ENST00000667966.1, exon 1 of 4)	LOC105376085
d35_high_control_vs_experiment	chr9_7393749_7394458	18.132104218412	2.28054077596654	0.000541437675612424	0.0259207107464594	Distal Intergenic	LOC105375970
d35_high_control_vs_experiment	chr9_78097355_78098079	20.0036353145207	2.63052523881543	0.00182175183304917	0.0471439737770139	Distal Intergenic	GNAQ
d35_high_control_vs_experiment	chr9_79277607_79278388	22.9989678861165	3.22509878469948	0.000497934872471367	0.0248677939216805	Distal Intergenic	LOC101927450
d35_high_control_vs_experiment	chr9_80948051_80948809	19.1211216086884	2.7429286198264	0.000491099402976868	0.0247460703042804	Distal Intergenic	LOC105376105
d35_high_control_vs_experiment	chr9_81665083_81666358	57.0177090180365	2.79412251298722	6.3423608848481e-05	0.00988445655827738	Intron (ENST00000376499.8/7088, intron 4 of 19)	TLE1
d35_high_control_vs_experiment	chr9_84139203_84139984	22.2847405334655	2.44019430108219	0.00112596529166475	0.0374056867335919	Distal Intergenic	LOC101927575
d35_high_control_vs_experiment	chr9_84151267_84152100	18.1068618479077	2.60184578408303	0.00116340984836552	0.0380988057561641	Distal Intergenic	LOC101927575
d35_high_control_vs_experiment	chr9_84846437_84847432	57.9163986090132	3.22915770033353	0.000469681570738538	0.0242217001078988	Intron (ENST00000693539.1/4915, intron 14 of 16)	NTRK2
d35_high_control_vs_experiment	chr9_84916549_84917203	17.7517551888398	3.6776518637631	0.000171421388013432	0.0149558445462096	Intron (ENST00000686332.1/4915, intron 14 of 16)	NTRK2
d35_high_control_vs_experiment	chr9_84989957_84991129	78.2382532950239	3.52572081895364	4.89637748526628e-05	0.00881494545476232	Intron (ENST00000692181.1/4915, intron 18 of 19)	NTRK2
d35_high_control_vs_experiment	chr9_96289126_96290082	21.4087353360905	3.13911430191059	0.000319290025883843	0.0200838918962068	Intron (ENST00000375263.8/3293, intron 2 of 10)	HSD17B3
d35_high_control_vs_experiment	chrX_101219481_101220487	22.142306563264	2.11135137764156	0.000855103347700134	0.0325434648197681	Promoter (<=1kb)	DRP2
d35_high_control_vs_experiment	chrX_101484969_101486045	100.206252545043	1.69110703774712	0.00202268633684741	0.0492859149518033	Promoter (<=1kb)	ARMCX4
d35_high_control_vs_experiment	chrX_103063085_103064580	106.211542723704	1.85895967794311	3.20237565385e-06	0.00275591225293767	Promoter (<=1kb)	BEX1
d35_high_control_vs_experiment	chrX_103310107_103311396	89.898540401469	1.4872370001979	0.00190225985252062	0.048083706643898	Promoter (<=1kb)	BEX2
d35_high_control_vs_experiment	chrX_103376049_103377573	94.9598512093474	1.5937188494977	0.000259144742979076	0.0183073861549315	Promoter (<=1kb)	BEX3
d35_high_control_vs_experiment	chrX_103780747_103781328	23.0001222215897	3.91712112745267	8.59946398142408e-05	0.0113787073734766	Promoter (<=1kb)	PLP1
d35_high_control_vs_experiment	chrX_103791138_103791672	17.0490607664622	3.6656253251971	4.18446674935169e-05	0.00840949149861355	Promoter (2-3kb)	PLP1
d35_high_control_vs_experiment	chrX_103793530_103794240	17.2571345086122	3.12397715295149	0.000911160578216137	0.0335711308628286	Promoter (1-2kb)	RAB9B
d35_high_control_vs_experiment	chrX_103831345_103832676	88.0002094463497	1.78550882672574	0.000258209389319564	0.0182924157042653	Promoter (<=1kb)	GLRA4
d35_high_control_vs_experiment	chrX_104165773_104167114	160.341315063358	1.24709193963417	0.00184418164079144	0.0474297014802351	Promoter (<=1kb)	FAM199X
d35_high_control_vs_experiment	chrX_106177038_106177631	23.7964052342356	1.64364171132361	0.00109157256359309	0.0368161263393116	5' UTR	PWWP3B
d35_high_control_vs_experiment	chrX_106611337_106612682	106.236036792393	1.64063360492147	0.00161198220617529	0.0443588362370763	Promoter (<=1kb)	RADX
d35_high_control_vs_experiment	chrX_106726063_106727411	51.6904789519442	1.89039442961787	0.000605933230284345	0.0272094746262378	Promoter (<=1kb)	RNF128
d35_high_control_vs_experiment	chrX_107449457_107450782	62.1288022681209	1.60262152604939	0.000500788583920899	0.0249274979728176	Promoter (<=1kb)	FRMPD3
d35_high_control_vs_experiment	chrX_107451080_107451634	26.9628459361949	2.29295841572705	0.000163139421474593	0.0147247287239186	Promoter (1-2kb)	FRMPD3
d35_high_control_vs_experiment	chrX_107483794_107484796	26.9408526285154	2.61955983172226	1.69738643530667e-05	0.00580182917404396	Intron (ENST00000683843.1/84443, intron 1 of 14)	FRMPD3
d35_high_control_vs_experiment	chrX_107715438_107717318	88.4274012337138	1.53019265397795	0.00173313938610456	0.0459658042018646	Promoter (<=1kb)	TSC22D3
d35_high_control_vs_experiment	chrX_110311531_110312281	19.0089817493887	3.77797250622034	3.81071921472225e-05	0.00801183728605766	Intron (ENST00000262844.10/9949, intron 1 of 5)	AMMECR1
d35_high_control_vs_experiment	chrX_111371933_111372615	37.1463598810267	2.98973440312375	0.00156873289673625	0.0438014025309561	Intron (ENST00000371993.7/1641, intron 2 of 4)	DCX
d35_high_control_vs_experiment	chrX_119685927_119686735	24.385889769131	2.54258693890195	5.78129312521135e-05	0.00958184001154793	Intron (ENST00000360156.11/23157, intron 1 of 10)	SEPTIN6
d35_high_control_vs_experiment	chrX_120358482_120359471	78.8336923219582	2.96820650329377	0.00103372045656858	0.0358928585645203	Promoter (2-3kb)	ATP1B4
d35_high_control_vs_experiment	chrX_120629549_120630607	183.954276805065	1.51427642668984	0.00166993673333095	0.0450364620448465	Promoter (<=1kb)	C1GALT1C1
d35_high_control_vs_experiment	chrX_12137787_12139275	49.2033897006933	1.65489106269482	0.000359349208591192	0.0213612594051487	Promoter (<=1kb)	FRMPD4
d35_high_control_vs_experiment	chrX_123183038_123185263	108.747300700398	1.46112099796442	0.000714984433630725	0.0298141567227569	Promoter (<=1kb)	GRIA3
d35_high_control_vs_experiment	chrX_123262833_123263875	25.1412458269952	2.95269769930682	0.000432176567445422	0.0232337878422975	Intron (ENST00000620443.2/2892, intron 3 of 15)	GRIA3
d35_high_control_vs_experiment	chrX_123764873_123765678	64.5488675752495	1.76986291563527	0.00134898356235287	0.0407855901067367	Exon (ENST00000453590.1/ENST00000453590.1, exon 1 of 1)	THOC2
d35_high_control_vs_experiment	chrX_124217479_124218505	46.1563237492535	2.40015253729964	0.000181353699465551	0.0153761956413756	Intron (ENST00000469481.1/10735, intron 2 of 3)	SH2D1A
d35_high_control_vs_experiment	chrX_128634138_128635262	23.797490724269	2.63514687486735	0.00163310797131691	0.0445140869958438	Intron (ENST00000660383.1/107985698, intron 5 of 10)	LOC107985698
d35_high_control_vs_experiment	chrX_12949817_12950550	18.0398372931477	2.70601666579253	0.000172644314343147	0.0150189563389083	Distal Intergenic	TMSB4X
d35_high_control_vs_experiment	chrX_129522206_129523904	131.154978676623	1.46825631546658	0.00131214636683496	0.0403041280331968	Promoter (<=1kb)	SMARCA1
d35_high_control_vs_experiment	chrX_133130070_133130786	20.2691782639088	2.95212621095241	0.000948889131330547	0.0343030763613346	Distal Intergenic	USP26
d35_high_control_vs_experiment	chrX_133334073_133335402	45.1723133055609	2.86675503745822	0.00168938634836295	0.0453494647888679	Intron (ENST00000370828.4/2239, intron 2 of 8)	GPC4
d35_high_control_vs_experiment	chrX_135006017_135006757	19.5671417446042	4.10310995716578	3.27801493566922e-06	0.00276304176190536	Distal Intergenic	SMIM10
d35_high_control_vs_experiment	chrX_135021555_135022882	123.364608197636	1.69030175752754	0.000481309940318787	0.0245264124672616	Promoter (<=1kb)	RTL8B
d35_high_control_vs_experiment	chrX_135421458_135422679	122.376997083815	1.46031463606109	0.00042194838179494	0.0229484046647338	Promoter (<=1kb)	SMIM10L2A
d35_high_control_vs_experiment	chrX_137565565_137567425	174.855450290139	1.41231008782091	0.000887093136837254	0.0331317653674381	Promoter (<=1kb)	ZIC3
d35_high_control_vs_experiment	chrX_138628031_138629055	22.8729652939969	3.27753375447008	0.000546216643626127	0.0259841825800942	3' UTR	MIR504
d35_high_control_vs_experiment	chrX_138648547_138649035	19.5275766375686	3.07330060720991	0.00203769569823964	0.0495168532927742	Intron (ENST00000315930.11/2258, intron 3 of 4)	MIR504
d35_high_control_vs_experiment	chrX_138756221_138756790	16.9497110546342	2.15492477933519	0.000713587666589946	0.0297806957190821	Intron (ENST00000441825.8/2258, intron 3 of 6)	FGF13
d35_high_control_vs_experiment	chrX_13891655_13892165	19.5398003311634	2.09786798945565	0.000134497195705902	0.013829200372428	Promoter (2-3kb)	GPM6B
d35_high_control_vs_experiment	chrX_139202265_139203380	36.8651018423849	3.34878313892112	0.000184607835412562	0.0155034485242421	Promoter (<=1kb)	FGF13
d35_high_control_vs_experiment	chrX_139203642_139204647	46.8617452173541	2.0065395569418	0.00148701886979853	0.0426432872190889	Promoter (<=1kb)	FGF13
d35_high_control_vs_experiment	chrX_139204726_139205688	69.9351856803312	2.31579725805287	0.000201318059868552	0.0161626393532756	Promoter (<=1kb)	FGF13
d35_high_control_vs_experiment	chrX_141176389_141177731	76.801482064806	1.32015028300958	0.000434768102736013	0.0233000053632054	Promoter (<=1kb)	LDOC1
d35_high_control_vs_experiment	chrX_148784532_148785312	19.3565238944895	2.89143505220041	1.50298233921511e-05	0.00545738695996405	Intron (ENST00000370460.7/2334, intron 3 of 20)	AFF2
d35_high_control_vs_experiment	chrX_152450504_152452010	44.968286499325	1.50461024243452	0.00117475028387694	0.0381891181418236	Promoter (<=1kb)	GABRA3
d35_high_control_vs_experiment	chrX_153878915_153879695	41.4640663868829	2.26182103887465	7.3727557093973e-06	0.00401561413773605	Promoter (<=1kb)	L1CAM-AS1
d35_high_control_vs_experiment	chrX_17548568_17549766	42.7256912019383	2.49167576998767	0.0005578995583125	0.0262231629654958	Intron (ENST00000676302.1/4810, intron 1 of 8)	NHS-AS1
d35_high_control_vs_experiment	chrX_20141168_20142309	164.181829019777	1.72200260165229	0.00181167939874244	0.0469714911376262	Promoter (<=1kb)	EIF1AX
d35_high_control_vs_experiment	chrX_21373614_21375219	162.323869980481	1.70084999556557	0.00121040683259746	0.0387932875124827	Promoter (<=1kb)	LOC105373146
d35_high_control_vs_experiment	chrX_21703297_21704259	30.125188926477	3.52627540381557	0.000275189799338729	0.0188980843241638	Distal Intergenic	KLHL34
d35_high_control_vs_experiment	chrX_21885491_21886505	19.8186516839539	2.40764428690978	0.00124050355385466	0.0393581039960325	Downstream (<=300bp)	YY2
d35_high_control_vs_experiment	chrX_24897710_24898949	21.7691389771975	3.17541228784607	0.000354962375000132	0.0211965046927844	Intron (ENST00000672178.1/5422, intron 31 of 32)	POLA1
d35_high_control_vs_experiment	chrX_38561070_38562870	121.058220164114	1.70006797897945	2.36235304279508e-05	0.00650334054266023	Promoter (<=1kb)	TSPAN7
d35_high_control_vs_experiment	chrX_44392704_44393724	18.4650347466793	3.32013143289148	0.000375201493422996	0.0217853088060301	Distal Intergenic	EFHC2
d35_high_control_vs_experiment	chrX_47264487_47265353	17.6728261599143	2.51942124886598	9.43063457300984e-05	0.0118048091654589	Distal Intergenic	USP11
d35_high_control_vs_experiment	chrX_68332099_68333112	18.4696425072609	2.43450753301415	0.00199162028724155	0.0489760051823305	Intron (ENST00000680612.1/4983, intron 2 of 19)	OPHN1
d35_high_control_vs_experiment	chrX_70436403_70437135	19.9816765190117	2.1459812966549	0.000527650819941352	0.0256298062025149	Promoter (1-2kb)	LOC105373244
d35_high_control_vs_experiment	chrX_72054735_72055532	17.4060313478609	2.68869966533404	0.00085310023436634	0.0325152317267191	Intron (ENST00000633930.2/340527, intron 1 of 7)	RPS26P11
d35_high_control_vs_experiment	chrX_72177127_72177934	16.5949672209336	3.39442884554298	2.27834977384013e-05	0.00641864404376149	Distal Intergenic	PIN4
d35_high_control_vs_experiment	chrX_84187097_84188792	112.943531180935	1.51230109484635	0.000712840017363258	0.0297806957190821	Promoter (<=1kb)	RPS6KA6
d35_high_control_vs_experiment	chrX_85243570_85245250	179.209618016698	1.55252440869526	0.000373935822238715	0.021779117581571	Promoter (<=1kb)	SATL1
d35_high_control_vs_experiment	chrX_93672717_93674400	147.726699833074	1.79197128398548	0.000423974295222932	0.0229837489828299	Promoter (<=1kb)	FAM133A
d35_low_control_vs_experiment	seqnames		none
d35_low_control_vs_experiment	chr1_10387472_10388655	37.8305369760798	-2.07260359122282	5.60021699637266e-05	0.00945557955773706	Distal Intergenic	PGD
d35_low_control_vs_experiment	chr1_10537155_10538267	25.8368808314789	-4.07253472489556	1.37580457042711e-05	0.00527832631576331	Promoter (1-2kb)	PEX14
d35_low_control_vs_experiment	chr1_10629975_10630657	16.9262795433609	-2.48099144796266	0.00166244826427705	0.0449231593254444	3' UTR	CASZ1
d35_low_control_vs_experiment	chr1_10677489_10678700	46.1761303522812	-2.59703278585929	0.000315543024761183	0.0199806256096145	Intron (ENST00000377022.8/54897, intron 4 of 20)	CASZ1
d35_low_control_vs_experiment	chr1_1068524_1069841	106.076477280951	-1.13186381336263	0.000993725694445133	0.0352191269265004	Exon (ENST00000412397.2/100288175, exon 9 of 10)	LOC100288175
d35_low_control_vs_experiment	chr1_107793844_107795172	30.9498403075148	-2.70693813898408	0.00116440770223849	0.0381008248756863	Intron (ENST00000370056.9/10451, intron 2 of 26)	VAV3
d35_low_control_vs_experiment	chr1_112527263_112528405	31.2211121331386	-3.35054109783874	9.13613023579733e-08	0.000501126962521145	Promoter (<=1kb)	ST7L
d35_low_control_vs_experiment	chr1_112558423_112559094	31.3312010819384	-2.75399919154888	0.00119479523556041	0.0385182450504179	Promoter (2-3kb)	ST7L
d35_low_control_vs_experiment	chr1_11550562_11551197	22.3246240842624	-2.02370588264881	7.61174637343083e-05	0.0108561268841175	Distal Intergenic	DISP3
d35_low_control_vs_experiment	chr1_120179337_120180492	53.47296089539	-1.70140330504457	0.00130444435897609	0.0402072171956286	Promoter (2-3kb)	SEC22B
d35_low_control_vs_experiment	chr1_12208456_12209336	39.1524451582424	-1.36374247471223	0.00137436180181125	0.0411883847402864	3' UTR	TNFRSF1B
d35_low_control_vs_experiment	chr1_12433270_12434120	27.7266687227973	-2.86166739644901	5.94308103264877e-07	0.0012762460611567	Intron (ENST00000620676.6/55187, intron 65 of 69)	VPS13D
d35_low_control_vs_experiment	chr1_12509868_12511598	40.4963933050334	-2.18199607305467	0.000280954947336377	0.0191193084917795	Promoter (2-3kb)	SNORA59A
d35_low_control_vs_experiment	chr1_12626687_12627863	54.7400807883048	-3.15207819589042	2.55432582680153e-05	0.0066605725152604	Distal Intergenic	DHRS3
d35_low_control_vs_experiment	chr1_1409886_1410960	40.3058608650288	-2.95830383648576	3.27168258596916e-05	0.00747892320710029	Promoter (<=1kb)	MRPL20-DT
d35_low_control_vs_experiment	chr1_14182909_14183976	22.5788185214611	-2.3512785599044	0.00110656311752995	0.0370303407432755	Intron (ENST00000636564.1/23254, intron 2 of 2)	NA
d35_low_control_vs_experiment	chr1_14512622_14513631	29.0154634394056	-3.84334435843402	4.45906013268829e-05	0.00850331813126352	Intron (ENST00000636203.1/23254, intron 2 of 16)	KAZN
d35_low_control_vs_experiment	chr1_14667353_14668437	23.9555150672738	-3.34899870807484	3.15901944550684e-05	0.00736303940001109	Intron (ENST00000636203.1/23254, intron 3 of 16)	KAZN
d35_low_control_vs_experiment	chr1_150259745_150260472	69.0240092157415	-1.93406526629294	0.000171337634874081	0.0149558445462096	Promoter (1-2kb)	CA14
d35_low_control_vs_experiment	chr1_151131048_151132312	96.5230570125192	-1.54576473336137	0.000491897773948026	0.0247467340300439	Promoter (2-3kb)	SEMA6C
d35_low_control_vs_experiment	chr1_15212718_15213833	32.7381280867894	-1.97222632785869	0.000487129260577144	0.0246557932984038	Intron (ENST00000428417.5/55092, intron 1 of 2)	FHAD1
d35_low_control_vs_experiment	chr1_154448140_154448891	18.1877044669447	-3.26194093537418	0.000984930414929817	0.0350354151974266	Exon (ENST00000344086.8/3570, exon 7 of 9)	IL6R
d35_low_control_vs_experiment	chr1_154805122_154806060	16.1915688508094	-3.68548693769033	5.66065404518814e-05	0.00951832012687815	Intron (ENST00000271915.9/3782, intron 2 of 7)	KCNN3
d35_low_control_vs_experiment	chr1_154955128_154957139	160.6318383842	-1.15367878162442	0.000150707455726507	0.0143941392060812	Promoter (<=1kb)	PBXIP1
d35_low_control_vs_experiment	chr1_156932707_156933695	22.2015060039501	-2.22132059792133	0.0013714265470168	0.0411414279944723	Promoter (<=1kb)	LRRC71
d35_low_control_vs_experiment	chr1_15961388_15962011	17.9227661780627	-3.32454392834004	5.01542808081675e-05	0.00895010683835558	Intron (ENST00000375743.9/7709, intron 2 of 15)	ZBTB17
d35_low_control_vs_experiment	chr1_16003881_16004410	18.6216631524451	-3.3112221779824	8.79105250272521e-05	0.0114317903760568	Promoter (<=1kb)	SRARP
d35_low_control_vs_experiment	chr1_162388504_162389532	44.3200277493244	-2.39541520720331	0.00013760686262894	0.013929799073869	Distal Intergenic	C1orf226
d35_low_control_vs_experiment	chr1_165221168_165222493	58.1578049815024	-2.55394594997556	0.00017866718259218	0.0152826346447476	Promoter (2-3kb)	LMX1A-AS1
d35_low_control_vs_experiment	chr1_165279712_165280438	37.834495064456	-2.8700044398197	0.00118445899072209	0.0383653949106438	Intron (ENST00000342310.7/4009, intron 3 of 8)	LMX1A-AS1
d35_low_control_vs_experiment	chr1_165344190_165345432	53.0140241663468	-3.34367923452025	2.55620716288566e-07	0.00075142078755357	Intron (ENST00000342310.7/4009, intron 3 of 8)	LMX1A
d35_low_control_vs_experiment	chr1_165350828_165351401	19.3912386363148	-3.49308499823951	2.05431305361958e-05	0.00625130789039198	Intron (ENST00000342310.7/4009, intron 3 of 8)	LMX1A
d35_low_control_vs_experiment	chr1_167173482_167174763	41.9828921572291	-2.26701750132419	0.000282615758923499	0.0191715766968299	Distal Intergenic	GPA33
d35_low_control_vs_experiment	chr1_17011308_17012471	137.32771133573	-1.26279442561239	0.000816105085758007	0.0317579593623019	Promoter (<=1kb)	ATP13A2
d35_low_control_vs_experiment	chr1_17015961_17016485	16.2269903929467	-2.45164231592342	0.000212455484887144	0.0166080971220281	Distal Intergenic	ATP13A2
d35_low_control_vs_experiment	chr1_17128125_17129003	17.4896812338381	-2.57070707657679	9.17292849166986e-05	0.0116386040794041	Distal Intergenic	PADI2
d35_low_control_vs_experiment	chr1_173444813_173445861	25.4452658960574	-2.61143740651565	0.000485886550314959	0.0246488913703891	Promoter (2-3kb)	TNFSF4
d35_low_control_vs_experiment	chr1_17772617_17774306	55.1249050759812	-2.53508857987882	8.71450789339414e-05	0.0113924269912259	Intron (ENST00000375406.2/81569, intron 1 of 2)	ACTL8
d35_low_control_vs_experiment	chr1_182768945_182769756	18.0076163939545	-2.66195810598962	0.00093404362905816	0.0340140766807577	Distal Intergenic	NPL
d35_low_control_vs_experiment	chr1_183031974_183032857	24.4714013001949	-2.51658026508836	0.00141186516705077	0.041707804985176	Intron (ENST00000258341.5/3915, intron 1 of 27)	LAMC1
d35_low_control_vs_experiment	chr1_184001988_184002799	42.5334055227443	-1.89198457855327	0.00145903787988555	0.0423627118506395	Intron (ENST00000649786.1/23127, intron 1 of 11)	COLGALT2
d35_low_control_vs_experiment	chr1_18480260_18481409	76.6932299471415	-2.6941609463877	2.66005848552178e-05	0.00672055952665651	Promoter (<=1kb)	KLHDC7A
d35_low_control_vs_experiment	chr1_18639012_18639794	18.2478537997729	-3.32711806618474	9.62821214672888e-06	0.00453377482657643	Intron (ENST00000420770.7/5081, intron 4 of 8)	PAX7
d35_low_control_vs_experiment	chr1_18653673_18654377	31.0688992980973	-2.06742673818057	0.00061316457115859	0.0273675665556458	Intron (ENST00000420770.7/5081, intron 4 of 8)	PAX7
d35_low_control_vs_experiment	chr1_18907019_18907542	29.6907731134208	-2.13982839945627	0.000210244241830777	0.0165644474073436	3' UTR	ALDH4A1
d35_low_control_vs_experiment	chr1_19456642_19457637	56.1271646861136	-2.35780262940845	0.000153082916939029	0.0144033669626549	Intron (ENST00000264202.8/832, intron 1 of 8)	MICOS10
d35_low_control_vs_experiment	chr1_19768226_19769720	41.7485554820372	-2.6389256168124	0.000226781146152497	0.0172263141967529	Promoter (1-2kb)	TMCO4
d35_low_control_vs_experiment	chr1_201748355_201748821	24.1808049237716	-2.83415820292862	4.33654957599285e-06	0.00310424673814822	Intron (ENST00000685211.1/89796, intron 7 of 33)	NAV1
d35_low_control_vs_experiment	chr1_201760377_201761055	21.7243250263216	-2.21556008238888	0.00169355492182261	0.045425124699304	Intron (ENST00000685211.1/89796, intron 7 of 33)	NAV1
d35_low_control_vs_experiment	chr1_201941383_201942388	126.697612719933	-2.58928820736964	6.06701876438715e-06	0.00364809838302599	Intron (ENST00000367288.5/25802, intron 1 of 2)	LMOD1
d35_low_control_vs_experiment	chr1_202009536_202010972	107.561451473493	-1.46195984296802	0.000461668149153805	0.024005625915443	Promoter (<=1kb)	ELF3-AS1
d35_low_control_vs_experiment	chr1_202577932_202578883	44.7834682298039	-3.14920251199341	0.000136028932181153	0.0138822465920786	Intron (ENST00000608999.6/4660, intron 23 of 23)	PPP1R12B
d35_low_control_vs_experiment	chr1_203177636_203178669	31.4908034436941	-3.02193767279229	1.11590907170919e-05	0.00484823789608913	Promoter (1-2kb)	CHI3L1
d35_low_control_vs_experiment	chr1_203629364_203630106	48.8556954897296	-1.57742770770345	0.000442677132230668	0.0235392429793333	Promoter (2-3kb)	ATP2B4
d35_low_control_vs_experiment	chr1_203657140_203657945	16.6679465412978	-3.13248794807566	6.71538817870724e-05	0.0101354490759454	Exon (ENST00000451818.2/ENST00000451818.2, exon 1 of 1)	ATP2B4
d35_low_control_vs_experiment	chr1_203870898_203871967	47.5143641206249	-1.91591325068384	0.000486225764614867	0.0246488913703891	3' UTR	SNRPE
d35_low_control_vs_experiment	chr1_204278774_204279430	17.0432922057543	-2.74633623215321	0.00107061134391207	0.0364529219192712	Promoter (<=1kb)	PLEKHA6
d35_low_control_vs_experiment	chr1_2049411_2050950	159.745987432756	-2.15434133948355	0.000653950375288589	0.0284529928119413	Promoter (<=1kb)	PRKCZ-DT
d35_low_control_vs_experiment	chr1_205481485_205482279	29.7718681311661	-2.79506033101306	3.09363401669168e-05	0.00727778612768664	Distal Intergenic	CDK18
d35_low_control_vs_experiment	chr1_205672064_205672461	22.5325193736363	-2.09754782654984	0.00206219714166441	0.0498127803963325	Intron (ENST00000367145.4/85414, intron 1 of 4)	SLC45A3
d35_low_control_vs_experiment	chr1_206444415_206445449	18.425437773551	-3.80535386732095	0.000141492825092111	0.0141140736111291	Intron (ENST00000573034.8/23380, intron 17 of 22)	SRGAP2
d35_low_control_vs_experiment	chr1_208654220_208654857	17.3857057791506	-3.65304924052759	5.08880518539036e-05	0.00899476773420057	Distal Intergenic	LINC02769
d35_low_control_vs_experiment	chr1_211724530_211725607	55.5295472940204	-3.04904935036527	0.000224556157680892	0.0171265369880163	Exon (ENST00000458662.1/ENST00000458662.1, exon 1 of 2)	NEK2-DT
d35_low_control_vs_experiment	chr1_21173537_21174051	18.7244070389761	-3.01167627642555	0.000884773623072369	0.0330854713652622	Promoter (<=1kb)	EIF4G3
d35_low_control_vs_experiment	chr1_212612210_212612940	34.3411428373626	-3.03469314731582	3.6910902275081e-05	0.00791113483247368	Promoter (2-3kb)	ATF3
d35_low_control_vs_experiment	chr1_214316447_214317088	31.7255602360984	-2.3579193677813	0.00153311684079287	0.0432977100058214	Intron (ENST00000491455.5/56950, intron 3 of 10)	SMYD2
d35_low_control_vs_experiment	chr1_21586202_21587299	41.9079703589089	-2.12076170751136	4.4929192450411e-05	0.0085180286414749	Promoter (<=1kb)	LINC02596
d35_low_control_vs_experiment	chr1_216425184_216426753	33.8984907849508	-2.87672790576907	0.000159303963953041	0.0146190800778994	Promoter (1-2kb)	USH2A
d35_low_control_vs_experiment	chr1_21764575_21765387	20.4215180898051	-2.48405934966343	0.0019494042236838	0.048594897077233	Intron (ENST00000308271.14/84196, intron 1 of 26)	USP48
d35_low_control_vs_experiment	chr1_219489363_219490276	35.5932966401536	-3.04169394312335	0.000344570494622381	0.0209791654937665	Distal Intergenic	LYPLAL1-AS1
d35_low_control_vs_experiment	chr1_22225585_22226559	49.6238566439121	-3.38472833680737	6.92199356216102e-05	0.0102915331215347	Distal Intergenic	MIR4418
d35_low_control_vs_experiment	chr1_226452666_226453507	27.9823147121436	-2.3478556911283	0.00131713365801784	0.0403748199717643	Distal Intergenic	PARP1
d35_low_control_vs_experiment	chr1_226814717_226815608	25.8272337990717	-2.19053200302624	0.000259341893102618	0.0183073861549315	Distal Intergenic	PSEN2
d35_low_control_vs_experiment	chr1_227922417_227923482	58.1909794717182	-2.07823420896851	0.0013574747974183	0.0409261122803017	Intron (ENST00000272164.6/7483, intron 3 of 3)	MIR5008
d35_low_control_vs_experiment	chr1_229027612_229028326	47.2317584315701	-2.60767708931319	0.00168711075476955	0.0453373953391483	Intron (ENST00000632635.1/105373158, intron 3 of 3)	LINC02815
d35_low_control_vs_experiment	chr1_229229250_229230977	58.1976358813454	-1.81618738867714	0.00190903594033179	0.0481322995582965	Intron (ENST00000651412.1/102723935, intron 2 of 3)	LOC102723935
d35_low_control_vs_experiment	chr1_229940413_229941494	26.3058778840545	-2.78011385878598	0.00128047625897373	0.0398069452127849	Distal Intergenic	LINC01682
d35_low_control_vs_experiment	chr1_230768884_230769655	23.6838317074472	-2.76654192072164	7.46656748373669e-05	0.0107388608893276	Exon (ENST00000366666.6/10753, exon 4 of 18)	CAPN9
d35_low_control_vs_experiment	chr1_231041031_231041861	29.0512168873654	-2.55269960802123	0.000877915818944274	0.0329697091353261	Promoter (<=1kb)	FAM89A
d35_low_control_vs_experiment	chr1_231068383_231069331	30.2406688329331	-3.65893464418786	0.000112521240323522	0.012660745098528	Distal Intergenic	FAM89A
d35_low_control_vs_experiment	chr1_232477558_232478399	22.8678275597586	-1.81002580945421	0.000704411912671248	0.0295866780587609	Intron (ENST00000366630.5/57568, intron 6 of 21)	SIPA1L2
d35_low_control_vs_experiment	chr1_232558884_232559468	24.7336726554107	-2.59877348043624	0.00118370674753112	0.0383575591339976	Promoter (2-3kb)	SIPA1L2
d35_low_control_vs_experiment	chr1_234876240_234877254	17.7697916310429	-2.01497432624602	0.00118859806141636	0.0384332122138984	Intron (ENST00000651370.1/107985365, intron 1 of 1)	LOC107985365
d35_low_control_vs_experiment	chr1_23555802_23556523	72.3393148955246	-2.76021800672044	4.43087131030664e-05	0.00847418231198277	Promoter (2-3kb)	ID3
d35_low_control_vs_experiment	chr1_23559258_23560143	145.855619688294	-1.77986528153265	9.53930795298215e-05	0.0118337422737774	Promoter (<=1kb)	ID3
d35_low_control_vs_experiment	chr1_23562048_23562737	123.431062573099	-1.86588584901346	0.00174395541267448	0.0460819295852156	Promoter (2-3kb)	ID3
d35_low_control_vs_experiment	chr1_23567744_23569121	70.7919280064425	-1.16730336684942	0.0018856440974104	0.047865492898213	Distal Intergenic	ID3
d35_low_control_vs_experiment	chr1_24186924_24188042	52.3502456409281	-1.30432809173098	0.00166823651958557	0.0450067578619349	Promoter (<=1kb)	IFNLR1
d35_low_control_vs_experiment	chr1_24375041_24376099	32.7983480181078	-2.59824480561288	0.000508098527700465	0.0250754797034052	Intron (ENST00000337248.9/90529, intron 5 of 8)	STPG1
d35_low_control_vs_experiment	chr1_24413274_24414094	68.3613263082462	-1.99485321894535	7.77734334770226e-05	0.0109674403259225	Promoter (<=1kb)	STPG1
d35_low_control_vs_experiment	chr1_24551933_24552785	38.8690178576356	-2.08117329672841	0.000642209225323537	0.028162223394621	Exon (ENST00000577528.1/100506985, exon 2 of 3)	NCMAP-DT
d35_low_control_vs_experiment	chr1_24730453_24731253	23.4848968421654	-2.57418843683502	0.00116262574436252	0.0380849237353007	Distal Intergenic	CLIC4
d35_low_control_vs_experiment	chr1_25253580_25254339	24.1641029330289	-2.89330475038486	0.000209170508710207	0.0165185837024541	Exon (ENST00000450820.2/57035, exon 2 of 2)	RSRP1
d35_low_control_vs_experiment	chr1_25552997_25553915	27.6782635670594	-2.83508267213421	0.000625424392539621	0.0277138943944796	Promoter (<=1kb)	LDLRAP1
d35_low_control_vs_experiment	chr1_25895346_25896085	52.8171452653124	-1.46469022269986	0.000865350064326043	0.0327501884239205	Promoter (2-3kb)	STMN1
d35_low_control_vs_experiment	chr1_26154711_26155495	28.1745906596354	-1.860430674671	0.000384883747968378	0.0220536076793155	Distal Intergenic	FAM110D
d35_low_control_vs_experiment	chr1_26306134_26307253	110.223744744714	-1.23842925792965	0.00195776629878787	0.0486287682468289	Promoter (<=1kb)	UBXN11
d35_low_control_vs_experiment	chr1_26335958_26337157	93.5884550970174	-1.4699700714532	0.000721814718814209	0.0299274804759556	Promoter (<=1kb)	CRYBG2
d35_low_control_vs_experiment	chr1_26408567_26409023	27.8141373389376	-1.84366675387291	0.000813864351393649	0.0317118088707233	Promoter (1-2kb)	LIN28A
d35_low_control_vs_experiment	chr1_26677351_26678079	29.7364626448104	-2.49814537668738	0.000176875202589466	0.0152283876456251	Distal Intergenic	ARID1A
d35_low_control_vs_experiment	chr1_27010842_27011454	46.0739486251884	-2.57196751304023	0.000117169419236806	0.0128757957186308	Promoter (1-2kb)	TENT5B
d35_low_control_vs_experiment	chr1_27504089_27505460	76.0875238478757	-1.69696803527237	0.000449026706226039	0.0236871039747264	Distal Intergenic	WASF2
d35_low_control_vs_experiment	chr1_27561367_27562347	42.2107797753219	-1.45617962019575	0.000304315045926964	0.0196913594058967	Intron (ENST00000247087.10/27245, intron 1 of 5)	AHDC1
d35_low_control_vs_experiment	chr1_29983910_29984844	19.420439400275	-1.95004614853338	0.00190906129766959	0.0481322995582965	Distal Intergenic	LINC01648
d35_low_control_vs_experiment	chr1_3265736_3266825	42.2515397196079	-3.94146795550056	5.42488169065701e-05	0.00931781512089379	Intron (ENST00000511072.5/63976, intron 3 of 15)	PRDM16
d35_low_control_vs_experiment	chr1_32736399_32737680	65.2753363639905	-3.09334094955559	1.11163949824896e-06	0.00174555126326975	Distal Intergenic	KIAA1522
d35_low_control_vs_experiment	chr1_3273924_3275028	27.0213410775586	-2.92185273329464	0.00135401381842394	0.0408891664563721	Intron (ENST00000511072.5/63976, intron 3 of 15)	PRDM16
d35_low_control_vs_experiment	chr1_33338217_33339269	83.6380494845232	-2.44033972166416	1.96365114328982e-05	0.006182275338099	Promoter (2-3kb)	PHC2
d35_low_control_vs_experiment	chr1_33348226_33349054	25.5724915143564	-2.9483566383236	9.95685501243197e-06	0.00456995315386302	Promoter (<=1kb)	PHC2
d35_low_control_vs_experiment	chr1_33357921_33358953	20.9005731259276	-2.25696172821556	0.00102830194319962	0.0358320560063705	Exon (ENST00000432703.1/101929464, exon 2 of 3)	PHC2
d35_low_control_vs_experiment	chr1_35726765_35728177	51.4270642634772	-2.41139467770887	0.000678625667919757	0.0289863520479908	Intron (ENST00000251195.9/63967, intron 24 of 24)	C1orf216
d35_low_control_vs_experiment	chr1_37070029_37071080	30.74191853389	-3.5734717982898	0.000206802508144307	0.0164223914615916	Distal Intergenic	GRIK3
d35_low_control_vs_experiment	chr1_37628930_37629723	29.6045695018046	-3.52929015029776	0.000119003672401759	0.0129820225354096	5' UTR	RSPO1
d35_low_control_vs_experiment	chr1_37630319_37630856	27.2462922335684	-3.44211813504868	6.38745240139468e-05	0.00991935725454189	Intron (ENST00000612451.4/284654, intron 2 of 5)	RSPO1
d35_low_control_vs_experiment	chr1_37660257_37661743	99.7397058056259	-2.19117917602945	0.0016325073760439	0.0445137430766488	Distal Intergenic	RSPO1
d35_low_control_vs_experiment	chr1_37995617_37996756	64.7183201417544	-2.25865999339674	0.000263487707419354	0.018486358587098	Promoter (2-3kb)	FHL3
d35_low_control_vs_experiment	chr1_39106895_39108125	57.1480406082866	-1.61620259144879	0.000288465923966666	0.0193314016687442	Promoter (1-2kb)	MACF1
d35_low_control_vs_experiment	chr1_39141854_39143123	45.3632490493439	-2.99135493587109	1.39287627103919e-06	0.00191463523381485	Intron (ENST00000361689.7/23499, intron 2 of 93)	MACF1
d35_low_control_vs_experiment	chr1_39170674_39171602	47.1696526383193	-2.81293046684594	9.50569354097965e-05	0.0118337422737774	Intron (ENST00000361689.7/23499, intron 2 of 93)	MACF1
d35_low_control_vs_experiment	chr1_39293074_39294121	31.7418922962397	-3.56043134404617	0.000117285531373511	0.0128757957186308	Exon (ENST00000361689.7/23499, exon 18 of 94)	MACF1
d35_low_control_vs_experiment	chr1_39892917_39893569	30.4845125593557	-2.30209568045216	0.000418923428021101	0.0228561186517933	Distal Intergenic	MYCL-AS1
d35_low_control_vs_experiment	chr1_40309185_40310057	30.9255095404847	-3.14405065108094	4.39402460042778e-05	0.00847418231198277	Exon (ENST00000372748.8/1298, exon 16 of 32)	COL9A2
d35_low_control_vs_experiment	chr1_42455703_42457145	118.561396655927	-1.3826566647783	0.00106165965605306	0.03629209895849	Promoter (<=1kb)	PPCS
d35_low_control_vs_experiment	chr1_42739888_42741565	85.0152805061137	-2.02577216551846	0.000376672676548557	0.0218356381557606	Promoter (<=1kb)	CLDN19
d35_low_control_vs_experiment	chr1_43912488_43913629	22.0968982953288	-2.34871593378885	0.000307046103970384	0.0197504088914625	3' UTR	ST3GAL3
d35_low_control_vs_experiment	chr1_43996032_43997071	35.6259524978083	-2.20989191159298	0.00140246299311495	0.0415907491257154	Promoter (<=1kb)	CCDC24
d35_low_control_vs_experiment	chr1_44013186_44014162	27.654079617238	-1.72760410334786	0.00168628061480415	0.0453373953391483	Promoter (2-3kb)	SLC6A9
d35_low_control_vs_experiment	chr1_44035931_44037395	62.9238892598201	-1.83669613586601	0.000698259271775744	0.0294613756868891	Promoter (<=1kb)	KLF17
d35_low_control_vs_experiment	chr1_44213115_44213946	60.0310569017155	-1.18822956118339	0.00130299543895422	0.0401829949828547	Promoter (<=1kb)	DMAP1
d35_low_control_vs_experiment	chr1_45796719_45797764	36.7559167096826	-3.74048322947508	2.77750750512073e-05	0.00680014357829437	Intron (ENST00000470809.1/23139, intron 1 of 4)	MAST2
d35_low_control_vs_experiment	chr1_45881360_45882062	20.5648551964808	-2.51863427665697	0.00027448927140264	0.0188721045207215	Intron (ENST00000470809.1/23139, intron 3 of 4)	MAST2
d35_low_control_vs_experiment	chr1_45926967_45927957	35.6640959136526	-3.01368161935923	3.96721080896875e-05	0.00818960430836902	Intron (ENST00000361297.7/23139, intron 4 of 28)	MAST2
d35_low_control_vs_experiment	chr1_4658903_4659915	34.4084187831674	-1.93022924930313	0.00060018007031704	0.0270530941740357	Intron (ENST00000378191.5/55966, intron 1 of 5)	AJAP1
d35_low_control_vs_experiment	chr1_47992289_47993376	43.4254165290687	-3.05384985221565	2.45443038420445e-05	0.0065768671569614	Promoter (<=1kb)	TRABD2B
d35_low_control_vs_experiment	chr1_53145885_53146741	42.0720283621904	-2.10129487757642	0.00111636647133226	0.0372349211899318	Distal Intergenic	SLC1A7
d35_low_control_vs_experiment	chr1_54297785_54298799	47.3177214776655	-2.11630000930475	0.00118741879397475	0.0384116053807304	Intron (ENST00000326956.12/23648, intron 1 of 13)	SSBP3
d35_low_control_vs_experiment	chr1_54937304_54938147	23.3364694609876	-3.1414249976909	0.000492819922999412	0.0247648854215562	Intron (ENST00000689429.1/ENST00000689429.1, intron 1 of 1)	LOC105378736
d35_low_control_vs_experiment	chr1_55868850_55869607	23.3060468901319	-3.53747984371585	1.72906666886525e-05	0.00580182917404396	Promoter (<=1kb)	LINC01755
d35_low_control_vs_experiment	chr1_56547992_56548917	22.893234469304	-3.41299114061294	0.000241023888983634	0.0177573692654601	Intron (ENST00000371250.4/8613, intron 1 of 5)	PLPP3
d35_low_control_vs_experiment	chr1_56780054_56781462	53.9945671193097	-2.52367313728473	0.000220454317652038	0.0169341000511827	Intron (ENST00000343433.7/199920, intron 4 of 19)	FYB2
d35_low_control_vs_experiment	chr1_56796351_56797751	56.0136160714487	-2.94844177785284	0.000518052252949538	0.0253262893965893	Intron (ENST00000343433.7/199920, intron 1 of 19)	FYB2
d35_low_control_vs_experiment	chr1_5766915_5767540	33.6675847383839	-2.96780553845531	8.2896307736589e-05	0.0111698789212734	Intron (ENST00000701409.1/ENST00000701409.1, intron 1 of 3)	MIR4689
d35_low_control_vs_experiment	chr1_60989922_60991304	70.5549600728471	-2.16690989203156	0.00126184914228055	0.0396007249088358	Intron (ENST00000371191.5/4774, intron 1 of 10)	NFIA-AS2
d35_low_control_vs_experiment	chr1_61462034_61463397	29.3018210640431	-2.76303339265587	0.000537022519311579	0.0258570835394127	3' UTR	NFIA
d35_low_control_vs_experiment	chr1_61588630_61589895	75.9116075816968	-2.15192793371251	0.00188325448957528	0.0478129084859658	Exon (ENST00000659508.1/ENST00000659508.1, exon 1 of 2)	MGC34796
d35_low_control_vs_experiment	chr1_61841657_61842611	42.8177802505776	-3.71486625643748	8.0555462922429e-05	0.0110745244542153	Intron (ENST00000635214.1/10207, intron 17 of 35)	PATJ
d35_low_control_vs_experiment	chr1_62263228_62264029	20.3666821529614	-3.25582136488679	0.000375133541964355	0.0217853088060301	Promoter (<=1kb)	KANK4
d35_low_control_vs_experiment	chr1_63804652_63805455	27.1158039893025	-3.33953580752831	1.10052448103438e-05	0.00482776900308662	Intron (ENST00000371079.6/4919, intron 1 of 8)	ROR1
d35_low_control_vs_experiment	chr1_63829479_63830337	25.3517834015179	-3.06855110410408	0.00158575499739217	0.0440734414152121	Intron (ENST00000371079.6/4919, intron 1 of 8)	ROR1
d35_low_control_vs_experiment	chr1_65469538_65470610	47.0190173390338	-2.43665175486619	0.00156411093530052	0.0437523216131466	Intron (ENST00000371059.7/3953, intron 2 of 19)	LEPROT
d35_low_control_vs_experiment	chr1_66229330_66230332	27.1011391490219	-2.67157898757903	0.00169973631856305	0.045510099938613	Intron (ENST00000329654.8/5142, intron 3 of 16)	PDE4B
d35_low_control_vs_experiment	chr1_68144789_68145525	23.7053525053504	-2.9150342526027	0.00160740418490319	0.0443407419195082	Intron (ENST00000420587.5/100289178, intron 9 of 9)	GNG12-AS1
d35_low_control_vs_experiment	chr1_68292944_68293427	19.5697301013017	-2.08330889791978	0.00176841970599032	0.0464021107179254	Distal Intergenic	WLS
d35_low_control_vs_experiment	chr1_74245064_74245893	34.2702181366795	-2.52729958077858	0.000131434543124956	0.0136619055769357	Intron (ENST00000557284.7/100526835, intron 4 of 26)	TNNI3K
d35_low_control_vs_experiment	chr1_7752152_7753304	52.2425099654343	-1.68310885250216	0.000853787861151408	0.0325172688694161	Promoter (<=1kb)	CAMTA1
d35_low_control_vs_experiment	chr1_8015038_8015605	21.1741104801796	-2.01428601723176	0.00162997269863227	0.0444931669648736	Promoter (<=1kb)	ERRFI1
d35_low_control_vs_experiment	chr1_8017647_8018238	18.7690748519584	-1.91831177075021	0.000423443315089639	0.0229798253938087	Promoter (2-3kb)	ERRFI1
d35_low_control_vs_experiment	chr1_8097167_8098215	41.5724598419518	-3.0370656346382	5.86812520341893e-05	0.00963409146519545	Intron (ENST00000445300.1/ENST00000445300.1, intron 2 of 2)	ERRFI1
d35_low_control_vs_experiment	chr1_81682119_81683065	28.2115626033971	-2.3264136671374	0.00138239707104413	0.0412784679751714	Intron (ENST00000674378.1/23266, intron 4 of 5)	ADGRL2
d35_low_control_vs_experiment	chr1_8372781_8374658	81.690287928285	-2.08513728336659	0.000169546275379602	0.0149134253051133	Intron (ENST00000337907.7/473, intron 13 of 23)	RERE
d35_low_control_vs_experiment	chr1_8381692_8382675	45.4359453895864	-2.81800663837975	0.000165904720266632	0.0148009656226002	Intron (ENST00000337907.7/473, intron 13 of 23)	RERE
d35_low_control_vs_experiment	chr1_83953834_83954809	21.7339381021672	-3.17352148943834	0.000735402808379625	0.0302440838447727	Promoter (1-2kb)	TTLL7
d35_low_control_vs_experiment	chr1_8408919_8409526	19.4313291475633	-2.70481218243126	8.02852921246824e-06	0.00417608530748888	Intron (ENST00000337907.7/473, intron 13 of 23)	RERE
d35_low_control_vs_experiment	chr1_8551646_8552999	61.244920275139	-2.51769336430343	0.00130006440573228	0.0401413070412809	Intron (ENST00000337907.7/473, intron 7 of 23)	RERE
d35_low_control_vs_experiment	chr1_8561020_8561660	19.4833444867332	-2.25651904072263	0.00132215006264347	0.0404461148080749	Intron (ENST00000337907.7/473, intron 5 of 23)	RERE
d35_low_control_vs_experiment	chr1_8571325_8572098	22.2774715238858	-3.08054453712032	0.000105277722585464	0.0123440033095104	Intron (ENST00000337907.7/473, intron 5 of 23)	RERE
d35_low_control_vs_experiment	chr1_8661492_8662576	31.1222205778064	-3.72850541472248	0.000109417830567569	0.0125589264926685	Intron (ENST00000337907.7/473, intron 2 of 23)	RERE
d35_low_control_vs_experiment	chr1_8669122_8670281	43.6111669009769	-3.41366989214705	6.00507044187064e-05	0.00970959449260026	Intron (ENST00000337907.7/473, intron 2 of 23)	RERE
d35_low_control_vs_experiment	chr1_8674697_8675303	16.2331048050781	-3.10082980713126	2.62166453359892e-05	0.0066788375233606	Intron (ENST00000337907.7/473, intron 2 of 23)	RERE
d35_low_control_vs_experiment	chr1_87972406_87973530	22.8666217917445	-2.98783273998405	0.00158688846732423	0.0440781117905175	Intron (ENST00000642677.1/107985518, intron 2 of 6)	LINC01773
d35_low_control_vs_experiment	chr1_8944667_8945518	24.9969426766527	-2.23566541517292	0.00117013164139	0.0381460060535687	Promoter (<=1kb)	CA6
d35_low_control_vs_experiment	chr1_90707793_90708691	21.1104911706897	-2.71430291638436	0.000450132084201123	0.0237073737695873	Distal Intergenic	BARHL2
d35_low_control_vs_experiment	chr1_9128359_9129951	120.262996156511	-1.72415541914095	1.99270805993201e-05	0.006182275338099	Promoter (<=1kb)	GPR157
d35_low_control_vs_experiment	chr1_91732416_91733119	23.2032979302475	-2.55494225037203	0.000750856187282651	0.0305890203412004	Intron (ENST00000533089.5/7049, intron 8 of 19)	TGFBR3
d35_low_control_vs_experiment	chr1_91736911_91737573	25.8033230146489	-1.95147070474224	0.000928033511257005	0.0338772796453884	Intron (ENST00000533089.5/7049, intron 7 of 19)	TGFBR3
d35_low_control_vs_experiment	chr1_9371278_9372014	45.3768556026062	-2.95562754972861	0.000121552266810825	0.0131078511537571	Distal Intergenic	SPSB1
d35_low_control_vs_experiment	chr1_93976752_93977546	16.9360580366738	-3.01884421373788	0.000312650410253177	0.0199317951320224	Distal Intergenic	ABCA4
d35_low_control_vs_experiment	chr1_94093149_94093860	17.6967747361823	-2.27088361603714	0.00200287472349676	0.0490615568261013	Intron (ENST00000370225.4/24, intron 6 of 49)	ABCA4
d35_low_control_vs_experiment	chr10_100866454_100867171	22.5778935051572	-1.69546665400283	0.000987328441088404	0.0350676853187905	Distal Intergenic	SLF2
d35_low_control_vs_experiment	chr10_100890183_100891140	41.9225071623379	-2.15441934150628	0.000363577129682502	0.0214922265118058	Distal Intergenic	SLF2
d35_low_control_vs_experiment	chr10_101217309_101218086	41.7195142919177	-1.40157974868953	0.00177587003056259	0.0465289986428989	Distal Intergenic	LBX1
d35_low_control_vs_experiment	chr10_101485571_101486589	48.2601056227197	-2.25916745982811	0.001444777361399	0.0421556981467984	Intron (ENST00000393441.8/8945, intron 3 of 13)	BTRC
d35_low_control_vs_experiment	chr10_101596776_101597752	56.9679150170055	-3.49226243939264	8.6667035225155e-05	0.0113924269912259	Promoter (2-3kb)	DPCD
d35_low_control_vs_experiment	chr10_102313199_102314074	27.7492236146513	-3.47485820558415	4.71368357136213e-05	0.00871738385327586	Intron (ENST00000676513.1/8729, intron 3 of 39)	GBF1
d35_low_control_vs_experiment	chr10_102333966_102334748	37.2456398163833	-3.01433674786351	0.000300845253011768	0.0195858633374663	Promoter (1-2kb)	GBF1
d35_low_control_vs_experiment	chr10_102778271_102779428	34.3603761437328	-4.32301111846335	1.11916955550242e-05	0.00484839087697123	Promoter (2-3kb)	WBP1L
d35_low_control_vs_experiment	chr10_103123212_103124078	22.2189543890994	-3.17917118593846	0.0012245272678861	0.0390475823914626	Intron (ENST00000675164.1/22978, intron 4 of 19)	NT5C2
d35_low_control_vs_experiment	chr10_103153065_103154355	36.964896191025	-2.0603606630375	0.00160924358850742	0.0443518537718673	Promoter (<=1kb)	NT5C2
d35_low_control_vs_experiment	chr10_103230992_103232107	39.3973665903906	-3.02848016987704	1.13256387266472e-05	0.0048505032523739	Intron (ENST00000675164.1/22978, intron 1 of 19)	RPEL1
d35_low_control_vs_experiment	chr10_103951687_103952614	24.2964678683315	-3.65411002620405	0.000242993132775608	0.0177573692654601	Intron (ENST00000698239.1/79991, intron 2 of 11)	LOC102724351
d35_low_control_vs_experiment	chr10_105112865_105114307	27.8903116980593	-2.69753176832902	0.00122500181977807	0.0390475823914626	Intron (ENST00000369701.8/22986, intron 7 of 26)	SORCS3
d35_low_control_vs_experiment	chr10_10798040_10799059	38.178766512347	-2.54542194197939	0.000121738684410404	0.0131091459412564	Promoter (<=1kb)	CELF2
d35_low_control_vs_experiment	chr10_110827321_110828195	42.6244528782392	-2.0679526000793	0.00104128466131246	0.0359511062728055	Promoter (<=1kb)	RBM20
d35_low_control_vs_experiment	chr10_112637770_112638415	17.5746268662396	-2.37346120788049	0.001495902402487	0.04278377638011	Intron (ENST00000393077.3/143187, intron 5 of 7)	MIR4295
d35_low_control_vs_experiment	chr10_112898340_112899503	52.8661721239072	-1.57455785223209	0.000208112905260518	0.0164767098934838	Intron (ENST00000428766.2/107984158, intron 2 of 2)	LINC02935
d35_low_control_vs_experiment	chr10_113093468_113094293	18.2265756175493	-2.66587203307172	0.000419884694528459	0.0228775522671224	Intron (ENST00000355995.9/6934, intron 5 of 14)	TCF7L2
d35_low_control_vs_experiment	chr10_113118915_113120077	37.3957088439505	-3.07000140016995	0.000208807640428486	0.0165118403721264	Intron (ENST00000355995.9/6934, intron 5 of 14)	TCF7L2
d35_low_control_vs_experiment	chr10_113132642_113133061	16.9671453411582	-3.39725718068784	5.14717972528371e-06	0.00330996591867449	Promoter (<=1kb)	TCF7L2
d35_low_control_vs_experiment	chr10_113631376_113632829	35.836605094617	-1.96558094453311	0.00114557197439182	0.0377315486753548	Exon (ENST00000359988.4/4892, exon 17 of 42)	NRAP
d35_low_control_vs_experiment	chr10_113709211_113710652	37.6390102503928	-3.03437369943275	2.64104514131962e-05	0.00670633633224447	Promoter (<=1kb)	CASP7
d35_low_control_vs_experiment	chr10_116926133_116927083	28.1198825056435	-3.1627014251265	0.000415311061986124	0.0228019121231059	Intron (ENST00000355371.9/57698, intron 11 of 16)	SHTN1
d35_low_control_vs_experiment	chr10_117674221_117675166	24.674956746229	-2.59301428159842	0.00148389485032918	0.0425963296799433	Distal Intergenic	LINC02674
d35_low_control_vs_experiment	chr10_117720855_117722222	50.8958025418229	-2.34824840710891	2.55656101201081e-05	0.0066605725152604	Distal Intergenic	LINC02674
d35_low_control_vs_experiment	chr10_119543931_119544689	19.8586552723454	-2.63897820780057	0.000284791134781844	0.0192323572938368	Promoter (1-2kb)	RGS10
d35_low_control_vs_experiment	chr10_120978320_120980363	78.6128369449185	-1.53459838245672	0.00103621722674393	0.0359126072391038	Promoter (<=1kb)	LOC105378519
d35_low_control_vs_experiment	chr10_121096784_121097650	30.8859450980469	-2.57173709628261	8.0266661221685e-05	0.0110698035304127	Distal Intergenic	LINC01153
d35_low_control_vs_experiment	chr10_121137669_121138584	16.5055546361693	-3.14984488344107	0.000296928729681648	0.0195858633374663	Distal Intergenic	LINC01153
d35_low_control_vs_experiment	chr10_121795089_121796268	26.976754340931	-3.8649407099253	3.14404305071475e-05	0.00736303940001109	Intron (ENST00000690984.1/11101, intron 3 of 4)	ATE1
d35_low_control_vs_experiment	chr10_122018799_122020534	91.3766191049685	-2.43072598606747	0.000159152247143638	0.0146190800778994	Promoter (<=1kb)	TACC2
d35_low_control_vs_experiment	chr10_122044059_122045113	38.4994999592327	-1.48816433744084	0.00149190034822535	0.0427506518961066	Intron (ENST00000369005.6/10579, intron 2 of 22)	TACC2
d35_low_control_vs_experiment	chr10_122172327_122172850	17.3745014031678	-2.01229326165687	0.000329311767877102	0.0204573482810236	Intron (ENST00000369005.6/10579, intron 7 of 22)	TACC2
d35_low_control_vs_experiment	chr10_125016858_125018189	44.5718004644269	-2.60392119683701	0.000616392290556445	0.0274789949815829	Intron (ENST00000309035.11/1488, intron 1 of 8)	CTBP2
d35_low_control_vs_experiment	chr10_125027732_125029134	68.9596233890086	-2.49699883706654	0.000369024996154388	0.021644043131841	Promoter (<=1kb)	CTBP2
d35_low_control_vs_experiment	chr10_125144101_125145051	33.4790535619348	-3.46229883282761	0.000217093292606659	0.0167786885404093	Intron (ENST00000337195.9/1488, intron 1 of 10)	CTBP2
d35_low_control_vs_experiment	chr10_125768091_125768888	32.3471736266316	-3.58200029604965	6.40925519755112e-06	0.00376355971707763	Promoter (1-2kb)	MMP21
d35_low_control_vs_experiment	chr10_127849814_127850611	16.7948207478318	-2.3986115669629	0.0016136182804729	0.0443588362370763	Distal Intergenic	CLRN3
d35_low_control_vs_experiment	chr10_127925448_127926577	28.5635744152901	-3.00227894887188	0.000156287188001576	0.0145382868417926	Intron (ENST00000254667.8/5791, intron 1 of 20)	PTPRE
d35_low_control_vs_experiment	chr10_133022411_133023210	18.7688702134841	-2.48434030708798	0.00171322545515626	0.045679428262924	Distal Intergenic	LOC112268067
d35_low_control_vs_experiment	chr10_13729802_13730822	21.1168452163889	-2.35735090826773	0.000572830669019014	0.0265383249935726	Intron (ENST00000449462.1/ENST00000449462.1, intron 1 of 2)	LOC105376426
d35_low_control_vs_experiment	chr10_14074248_14075112	32.7212282678975	-2.4812715573412	0.00186377721632739	0.0476159602386838	Promoter (<=1kb)	LOC101928453
d35_low_control_vs_experiment	chr10_16436339_16437566	112.906994285154	-1.89722370374522	0.000170095170460921	0.0149263631067864	Promoter (<=1kb)	PTER
d35_low_control_vs_experiment	chr10_16744661_16745658	22.1827538491344	-3.17907888382207	0.000499459835670427	0.0248949023423934	Intron (ENST00000377921.7/6251, intron 6 of 7)	RSU1
d35_low_control_vs_experiment	chr10_1761881_1762952	22.4372140529829	-2.72134253961023	0.000176434197327356	0.0151991236178996	Distal Intergenic	ADARB2
d35_low_control_vs_experiment	chr10_20142186_20142907	17.6590680680487	-2.64799168948494	0.00156153921897516	0.0437067464102444	Intron (ENST00000377242.7/84898, intron 3 of 12)	PLXDC2
d35_low_control_vs_experiment	chr10_23776752_23777792	38.4396403075553	-3.31955937509628	0.000124777407860671	0.0133598033024611	Intron (ENST00000376462.5/56243, intron 1 of 18)	KIAA1217
d35_low_control_vs_experiment	chr10_24255019_24256368	47.813723337202	-1.82793502738073	0.00175884811151477	0.0462635413550154	Promoter (<=1kb)	KIAA1217
d35_low_control_vs_experiment	chr10_28445210_28446019	17.988735085619	-3.14818152987971	0.000469719121655703	0.0242217001078988	Intron (ENST00000421132.1/105376468, intron 1 of 2)	LINC02652
d35_low_control_vs_experiment	chr10_28685576_28686180	17.0297178976054	-3.15686762028702	3.46107097282619e-05	0.00772397400909487	Distal Intergenic	BAMBI
d35_low_control_vs_experiment	chr10_28875333_28876363	84.852480498385	-2.21862663325842	0.00196014748187258	0.0486557414485626	Promoter (<=1kb)	C10orf126
d35_low_control_vs_experiment	chr10_29345179_29346318	37.2750899472209	-3.84705382810192	7.74040508738146e-05	0.0109407075521717	Exon (ENST00000702470.1/ENST00000702470.1, exon 3 of 3)	LYZL1
d35_low_control_vs_experiment	chr10_30422920_30424262	54.4348459023482	-2.05025920963002	0.000201531584041733	0.0161626393532756	Distal Intergenic	MAP3K8
d35_low_control_vs_experiment	chr10_3111484_3112340	30.5935418404562	-3.21964226165469	7.02707296423168e-05	0.0103360542401969	Promoter (1-2kb)	PFKP
d35_low_control_vs_experiment	chr10_35219850_35220810	47.4704778157546	-2.74617086233365	0.00103568271758591	0.0359126072391038	Exon (ENST00000439198.1/105376493, exon 2 of 2)	LINC02634
d35_low_control_vs_experiment	chr10_4431137_4432071	36.520361645601	-2.62601734609681	0.00162485875129404	0.0444588445191622	Distal Intergenic	LINC00703
d35_low_control_vs_experiment	chr10_4662791_4663975	61.5724706316532	-2.68117577819531	0.000382165790492961	0.0219690525643803	Promoter (2-3kb)	LINC00705
d35_low_control_vs_experiment	chr10_4820655_4821710	36.9316955088242	-3.07527898396292	0.000452055916834873	0.0237260643057147	Intron (ENST00000533295.5/83592, intron 1 of 5)	AKR1E2
d35_low_control_vs_experiment	chr10_5513105_5514921	61.8548320828975	-3.18770807544873	0.000238236916091935	0.0176440297551086	Exon (ENST00000543008.2/100132159, exon 2 of 2)	CALML3-AS1
d35_low_control_vs_experiment	chr10_5599823_5600562	27.0089898413901	-3.7601201246572	2.82823382602134e-05	0.006913077234092	Promoter (2-3kb)	LASTR
d35_low_control_vs_experiment	chr10_6218737_6219812	36.8641813618077	-3.31551507953154	0.000479650164873832	0.0244649082549195	Promoter (1-2kb)	PFKFB3
d35_low_control_vs_experiment	chr10_6564440_6565274	16.3781128995212	-3.46058551820946	6.30222192231939e-06	0.00376205116417684	Intron (ENST00000397176.6/5588, intron 1 of 16)	PRKCQ
d35_low_control_vs_experiment	chr10_68871062_68872563	82.4207953400318	-2.16462270908973	0.000617750038501344	0.02752510702947	Intron (ENST00000298596.11/219736, intron 1 of 3)	DDX50
d35_low_control_vs_experiment	chr10_69278241_69279325	43.1470893233038	-2.5780429918517	0.000867064001855382	0.0327820412673316	Promoter (<=1kb)	HK1
d35_low_control_vs_experiment	chr10_69468583_69469300	21.7278327627751	-3.72226503379629	2.01905522985576e-05	0.00620684002920381	Intron (ENST00000373290.7/23555, intron 1 of 7)	TSPAN15
d35_low_control_vs_experiment	chr10_69952260_69953540	32.1570839974765	-2.49582617335621	0.000578113595093125	0.0266277757538684	Promoter (<=1kb)	COL13A1
d35_low_control_vs_experiment	chr10_71377069_71377785	50.7054234709591	-1.84291340234277	0.000357695147057718	0.0212895987734271	Intron (ENST00000644895.1/55315, intron 5 of 5)	CDH23
d35_low_control_vs_experiment	chr10_72455754_72456858	58.6856082733272	-3.86824477381366	3.8296915243587e-05	0.00802694803828579	Intron (ENST00000476605.7/10367, intron 5 of 9)	MICU1
d35_low_control_vs_experiment	chr10_73965726_73967587	185.679080512496	-1.90937379583372	5.94031799988538e-05	0.00968523105566996	Distal Intergenic	VCL
d35_low_control_vs_experiment	chr10_73994797_73995493	23.4078485182493	-3.15350779893288	0.000650777166983715	0.0283559645295151	Promoter (<=1kb)	VCL
d35_low_control_vs_experiment	chr10_7488408_7489309	28.4100926310869	-2.58127662348685	0.000822637178737737	0.0319459917059546	Distal Intergenic	LINC02642
d35_low_control_vs_experiment	chr10_75995298_75996532	25.132240702178	-3.28068136976489	0.000654532502087681	0.0284700805487068	Intron (ENST00000611255.5/83938, intron 2 of 6)	LRMDA
d35_low_control_vs_experiment	chr10_76012447_76013495	46.9778171959295	-2.58350937582665	0.00106691331356982	0.0363764445140355	Intron (ENST00000611255.5/83938, intron 2 of 6)	LRMDA
d35_low_control_vs_experiment	chr10_76308730_76310001	47.9054065523758	-2.93863001325159	0.000476796401785241	0.0244039561111224	Intron (ENST00000611255.5/83938, intron 5 of 6)	LRMDA
d35_low_control_vs_experiment	chr10_77993248_77994403	33.364158385598	-3.28903707376717	0.00100155706508362	0.0353508020212951	Promoter (<=1kb)	POLR3A
d35_low_control_vs_experiment	chr10_78292893_78294021	50.2643857772443	-1.91314274405463	0.000401504573306144	0.022521549164646	Exon (ENST00000434440.1/ENST00000434440.1, exon 1 of 2)	LINC00595
d35_low_control_vs_experiment	chr10_79157259_79158153	52.263553909352	-1.8263471116436	0.000745788417860736	0.0304897046273906	Intron (ENST00000334512.10/57178, intron 3 of 24)	ZMIZ1
d35_low_control_vs_experiment	chr10_83769121_83769965	37.5284597079829	-2.9233875208516	0.00195279564516711	0.048594897077233	Distal Intergenic	LINC02650
d35_low_control_vs_experiment	chr10_87734770_87735635	39.876463985737	-1.73558221540083	0.000234147214808751	0.0174677973236551	Intron (ENST00000361175.8/9060, intron 8 of 11)	PAPSS2
d35_low_control_vs_experiment	chr10_89277661_89278673	44.4028432357453	-2.47547247852238	0.00136467968725386	0.041057352882379	Exon (ENST00000487618.5/105378419, exon 4 of 4)	IFIT2
d35_low_control_vs_experiment	chr10_90930055_90931819	69.0235252621544	-1.74636129688134	0.00182156584293634	0.0471439737770139	Distal Intergenic	ANKRD1
d35_low_control_vs_experiment	chr10_93458607_93459358	67.4549104999901	-1.98514696898018	0.000939137626666764	0.03410045017601	Intron (ENST00000359263.9/26509, intron 1 of 53)	MYOF
d35_low_control_vs_experiment	chr10_93790226_93791427	73.2642312023955	-2.97083236894834	3.18620585116124e-05	0.00736871376270482	Promoter (1-2kb)	LGI1
d35_low_control_vs_experiment	chr10_93876117_93876944	24.2137711224326	-3.17087844999954	0.000862563830489375	0.0327081723517035	Distal Intergenic	SLC35G1
d35_low_control_vs_experiment	chr10_98455996_98457028	22.4688632507	-2.17201892895066	0.000944301363689953	0.0342275974443996	Distal Intergenic	HPS1
d35_low_control_vs_experiment	chr10_99911864_99912818	23.2602460530523	-2.72936927220586	0.000593219086665764	0.0268925389635196	Promoter (1-2kb)	DNMBP
d35_low_control_vs_experiment	chr11_11038440_11039629	66.3378550078545	-2.34479875017757	0.00149782462638008	0.0428143158320185	Intron (ENST00000647635.1/105376550, intron 1 of 6)	LINC02752
d35_low_control_vs_experiment	chr11_111963597_111964502	21.2374257324761	-3.20326544269828	0.000190712654828019	0.0157955260810038	Intron (ENST00000529225.5/85458, intron 2 of 5)	DIXDC1
d35_low_control_vs_experiment	chr11_11422189_11423095	23.4303083474329	-2.48682129054514	0.00115258384715902	0.0378466943696331	Intron (ENST00000227756.5/374378, intron 3 of 10)	CSNK2A3
d35_low_control_vs_experiment	chr11_115548650_115549520	24.2694734783687	-2.35143780133155	0.00159492715100637	0.0441623547568674	Distal Intergenic	CADM1
d35_low_control_vs_experiment	chr11_115751160_115752100	20.7150967359184	-4.31818557174682	1.01439791356159e-05	0.00459305320349836	Intron (ENST00000539305.1/105369512, intron 2 of 2)	LINC00900
d35_low_control_vs_experiment	chr11_117045003_117045879	37.4527197080523	-3.33132556802688	6.13149413566751e-05	0.00981050094441443	Intron (ENST00000445177.6/23387, intron 1 of 24)	SIK3
d35_low_control_vs_experiment	chr11_117052175_117053136	27.5181670150046	-3.72104491049223	0.000112290032323945	0.0126505059602889	Intron (ENST00000445177.6/23387, intron 1 of 24)	SIK3
d35_low_control_vs_experiment	chr11_117077102_117077930	18.1625774115285	-2.6799631724171	7.84218758784483e-05	0.010976345073827	Intron (ENST00000445177.6/23387, intron 1 of 24)	SIK3
d35_low_control_vs_experiment	chr11_117743223_117744114	33.2199394172362	-2.79500900659002	0.000291007543926501	0.0193959359212976	Intron (ENST00000651296.2/57453, intron 3 of 32)	DSCAML1
d35_low_control_vs_experiment	chr11_118615248_118615736	33.8620317678029	-2.34877790705686	0.000382895066779616	0.0219941539601245	Promoter (<=1kb)	PHLDB1
d35_low_control_vs_experiment	chr11_118770937_118771953	16.389650047929	-2.98209660862534	7.37872048500985e-05	0.0106859938045193	Intron (ENST00000534980.7/1656, intron 4 of 13)	DDX6
d35_low_control_vs_experiment	chr11_118921252_118921610	22.3940111451587	-2.05349879256623	0.0002977910272637	0.0195858633374663	Intron (ENST00000683865.1/283149, intron 1 of 9)	UPK2
d35_low_control_vs_experiment	chr11_119039457_119040418	21.5132223388137	-2.59502844647466	0.000299480565249155	0.0195858633374663	Distal Intergenic	HYOU1
d35_low_control_vs_experiment	chr11_119332098_119333002	44.3601449204022	-2.96731026813529	0.000229834521257041	0.0173182327859472	Promoter (1-2kb)	RNF26
d35_low_control_vs_experiment	chr11_119368322_119369294	39.105349290176	-1.92732558386902	0.00132947977089141	0.0405219072504564	Promoter (<=1kb)	USP2-AS1
d35_low_control_vs_experiment	chr11_11940443_11941173	16.5027565233281	-3.20038825641765	0.00016322564482345	0.0147247287239186	Promoter (1-2kb)	USP47
d35_low_control_vs_experiment	chr11_120569664_120570266	17.0909359100721	-2.77848842264482	0.000859864681542861	0.032665948509712	Intron (ENST00000638419.1/2900, intron 1 of 20)	GRIK4
d35_low_control_vs_experiment	chr11_121841672_121842638	28.7813518075251	-3.09390840963702	0.000231399137398346	0.017375162502201	Intron (ENST00000652518.1/107984402, intron 1 of 6)	LOC107984402
d35_low_control_vs_experiment	chr11_122229370_122230471	43.3716285602678	-2.63861600821801	0.000359627375812548	0.0213679783672021	Intron (ENST00000660311.1/399959, intron 2 of 4)	MIR100HG
d35_low_control_vs_experiment	chr11_122367778_122368326	26.8575059992734	-2.96651287392247	0.000100191090229274	0.0120489805109725	Promoter (<=1kb)	MIR100HG
d35_low_control_vs_experiment	chr11_122976866_122977826	36.8376592678411	-1.56713648004359	0.00197093503644049	0.0487671378471713	3' UTR	BSX
d35_low_control_vs_experiment	chr11_122981632_122982156	36.0771679397641	-1.5600991180027	0.00105474865080463	0.0362080591304422	Promoter (<=1kb)	BSX
d35_low_control_vs_experiment	chr11_123407328_123408759	82.1350947727596	-2.64639968447978	2.45313871575132e-05	0.0065768671569614	Intron (ENST00000638157.1/57476, intron 1 of 20)	GRAMD1B
d35_low_control_vs_experiment	chr11_123434813_123435425	19.4528494153966	-3.61239276948727	0.000136720996235279	0.0138892985533601	Intron (ENST00000638157.1/57476, intron 1 of 20)	GRAMD1B
d35_low_control_vs_experiment	chr11_123437857_123438699	37.5594723881269	-3.61137398228465	5.03709890109306e-05	0.00897158640173951	Intron (ENST00000638157.1/57476, intron 1 of 20)	GRAMD1B
d35_low_control_vs_experiment	chr11_125381501_125383138	67.5502981292853	-2.32794288133488	0.00189856913881838	0.048068010529736	Promoter (2-3kb)	PKNOX2
d35_low_control_vs_experiment	chr11_125401374_125402234	48.3255173301579	-2.79618344197126	1.7435148688391e-05	0.00583728001466008	Intron (ENST00000530517.5/63876, intron 6 of 11)	PKNOX2
d35_low_control_vs_experiment	chr11_125483137_125483978	22.6701623350405	-2.91653469941821	0.000404431360736488	0.0225756198673274	Promoter (1-2kb)	FEZ1
d35_low_control_vs_experiment	chr11_126100810_126101717	30.2581260667607	-2.31158635007469	0.0016430212651555	0.0446412071226158	Exon (ENST00000567082.1/ENST00000567082.1, exon 1 of 1)	LOC105369591
d35_low_control_vs_experiment	chr11_126954871_126955687	25.3570287994235	-3.1400977963921	0.000872357559049766	0.0328767748778368	Intron (ENST00000525144.7/84623, intron 1 of 16)	KIRREL3-AS2
d35_low_control_vs_experiment	chr11_12746520_12747117	51.7522681872313	-1.47695460158925	0.00161555072200149	0.0443683432219135	Intron (ENST00000527636.7/7003, intron 2 of 12)	TEAD1
d35_low_control_vs_experiment	chr11_129743085_129744129	20.2363232653767	-2.87631927684591	0.000711504786464289	0.0297598656163729	Distal Intergenic	TMEM45B
d35_low_control_vs_experiment	chr11_129861662_129862421	36.6500473365155	-1.87803403161847	9.94252275044736e-05	0.0120242134550362	Exon (ENST00000687802.1/ENST00000687802.1, exon 1 of 2)	TMEM45B
d35_low_control_vs_experiment	chr11_130088713_130089439	18.2819450008799	-2.79615985047025	0.000978333525346422	0.0349081384281274	Intron (ENST00000650012.1/334, intron 2 of 18)	APLP2
d35_low_control_vs_experiment	chr11_130383177_130384474	63.9370411239801	-2.55189767055201	0.000135750510709986	0.0138822465920786	Intron (ENST00000602376.5/646383, intron 2 of 5)	ZBTB44-DT
d35_low_control_vs_experiment	chr11_130782205_130783266	50.1680606625877	-2.49942166330924	9.21917343303055e-06	0.00441360588000101	Promoter (2-3kb)	LOC105369576
d35_low_control_vs_experiment	chr11_131815316_131816286	31.3870819990693	-2.6717098798257	0.000314436962667974	0.0199441925793515	Intron (ENST00000374791.7/50863, intron 1 of 7)	LOC107984413
d35_low_control_vs_experiment	chr11_13221534_13222583	29.745974627937	-2.61115149635209	0.00164242892926815	0.0446389674185924	Distal Intergenic	BMAL1
d35_low_control_vs_experiment	chr11_16776633_16777299	31.5071985321656	-2.3711483571338	0.00140713727903837	0.041642711775433	3' UTR	PLEKHA7
d35_low_control_vs_experiment	chr11_16812188_16812904	29.7442584476393	-1.96303955795733	0.00193850791840772	0.0484728068098987	Promoter (<=1kb)	PLEKHA7
d35_low_control_vs_experiment	chr11_16986813_16987683	33.6874961627173	-2.59046656803681	0.000297116271935264	0.0195858633374663	Intron (ENST00000531066.6/144100, intron 3 of 26)	PLEKHA7
d35_low_control_vs_experiment	chr11_19252640_19253631	42.0388757296296	-2.66762168763653	0.00195181186769452	0.048594897077233	Intron (ENST00000527978.1/105376580, intron 3 of 3)	E2F8
d35_low_control_vs_experiment	chr11_20021969_20022536	19.7964050920151	-2.25273236555152	0.000352234092023627	0.0211038620500007	Promoter (<=1kb)	NAV2
d35_low_control_vs_experiment	chr11_20022588_20023433	63.6909318485192	-1.80179015564024	0.000209989009021576	0.0165616987309383	Promoter (<=1kb)	NAV2
d35_low_control_vs_experiment	chr11_20031169_20031877	20.730375376267	-2.68105493507103	0.000493664028952683	0.0247766478591995	Intron (ENST00000360655.8/89797, intron 11 of 37)	NAV2
d35_low_control_vs_experiment	chr11_20246225_20246782	16.1134597708557	-2.99298378228856	0.000525011456811644	0.0255578340795034	Distal Intergenic	DBX1
d35_low_control_vs_experiment	chr11_28316619_28317799	28.0805311310888	-3.50134861362035	0.000312220749040143	0.0199251667596081	Intron (ENST00000406787.7/196074, intron 6 of 6)	METTL15
d35_low_control_vs_experiment	chr11_31601555_31602369	32.6633464640735	-3.35928866204531	5.63265200599061e-05	0.00949247099552173	Promoter (1-2kb)	ELP4
d35_low_control_vs_experiment	chr11_320414_321257	40.4830245318703	-1.8772366039586	0.00146640003920524	0.0424406210807715	Promoter (<=1kb)	IFITM3
d35_low_control_vs_experiment	chr11_333836_334881	47.059660677314	-1.59848010680974	0.00112736979108829	0.0374168164368159	Distal Intergenic	NA
d35_low_control_vs_experiment	chr11_44243028_44244287	32.8622565887582	-2.71602931584323	0.000797834646988095	0.0314758988427387	3' UTR	EXT2
d35_low_control_vs_experiment	chr11_44319092_44320199	37.1866981463703	-1.62836561711011	0.000458108645308215	0.0238990751504516	Distal Intergenic	ALX4
d35_low_control_vs_experiment	chr11_45921684_45922839	105.753462686509	-1.2153889680048	0.00201319799228595	0.0491625286905314	Promoter (<=1kb)	LARGE2
d35_low_control_vs_experiment	chr11_46049940_46051147	64.4770111074876	-1.91356770518823	0.000486337015164305	0.0246488913703891	Exon (ENST00000691784.1/51317, exon 6 of 8)	PHF21A
d35_low_control_vs_experiment	chr11_46462879_46464400	33.2419772795897	-2.79993447003584	8.18647423373898e-05	0.0111243872934364	Intron (ENST00000314845.7/55626, intron 12 of 18)	MIR3160-1
d35_low_control_vs_experiment	chr11_47415837_47416552	45.3875044861109	-2.30232848387814	0.00035086118774686	0.0210854455878085	Promoter (<=1kb)	SLC39A13
d35_low_control_vs_experiment	chr11_47990740_47991831	30.8916575723652	-2.14588889940927	0.00145919921478538	0.0423627118506395	Intron (ENST00000698881.1/5795, intron 1 of 24)	PTPRJ
d35_low_control_vs_experiment	chr11_48055501_48056491	36.9563851865282	-2.17125574177416	0.000145465782287365	0.0142367938474051	Intron (ENST00000698881.1/5795, intron 1 of 24)	PTPRJ
d35_low_control_vs_experiment	chr11_62426420_62427167	24.5226658665754	-2.1949618239187	0.00121468385269298	0.0388508438982527	Promoter (<=1kb)	LOC102723765
d35_low_control_vs_experiment	chr11_62480370_62481132	21.0608915521399	-2.90874688067721	0.000367011481211072	0.0215927618748579	Intron (ENST00000530124.5/79026, intron 2 of 2)	AHNAK
d35_low_control_vs_experiment	chr11_62560469_62561031	35.8654571185266	-2.36291766804739	0.00114320553773027	0.0377315486753548	Intron (ENST00000329251.5/1937, intron 7 of 9)	AHNAK
d35_low_control_vs_experiment	chr11_63017438_63018078	17.086914872474	-2.32713104200924	0.00084991266384258	0.032466872809449	Promoter (1-2kb)	SLC22A8
d35_low_control_vs_experiment	chr11_6321542_6322458	35.8169470313776	-2.56694910149915	0.000236092257623006	0.0175567023338008	Promoter (1-2kb)	CAVIN3
d35_low_control_vs_experiment	chr11_63532750_63533508	21.2017743380976	-2.83519722903375	0.000965592499625702	0.0346483304419725	Distal Intergenic	PLAAT4
d35_low_control_vs_experiment	chr11_63663249_63664187	17.0437581457802	-3.13591230172864	0.000260657710345269	0.0183356903638992	Intron (ENST00000398868.8/25923, intron 1 of 12)	ATL3
d35_low_control_vs_experiment	chr11_63698815_63700074	23.5725037008882	-2.68138429176688	0.00122778383390988	0.0391030942441742	Intron (ENST00000341307.6/10313, intron 1 of 5)	RTN3
d35_low_control_vs_experiment	chr11_64762433_64764442	100.620412593407	-1.57514768406538	5.26242505021999e-05	0.00914672048425186	Promoter (2-3kb)	PYGM
d35_low_control_vs_experiment	chr11_66119002_66120297	54.8130106324918	-3.88005639338919	5.58366593633844e-08	0.000364941122556555	Intron (ENST00000320580.9/55690, intron 1 of 23)	PACS1
d35_low_control_vs_experiment	chr11_66370997_66372643	217.24043403508	-1.18846881573275	0.00064832285683503	0.0283064575816805	Promoter (<=1kb)	SLC29A2
d35_low_control_vs_experiment	chr11_66421441_66422086	63.7647802616433	-1.2041290038775	0.000797537998448406	0.0314754265205452	Promoter (<=1kb)	NPAS4
d35_low_control_vs_experiment	chr11_6701938_6703004	31.3087751607649	-3.48654648289013	0.000293706183512317	0.0194670996633549	Distal Intergenic	MRPL17
d35_low_control_vs_experiment	chr11_67270212_67271210	38.7091499479232	-1.87158726296186	0.000345461729525041	0.0210069990037921	Promoter (<=1kb)	GRK2
d35_low_control_vs_experiment	chr11_67581334_67581985	39.1726340177968	-3.73900970727296	3.45423539536588e-06	0.00280679965301825	Promoter (1-2kb)	GSTP1
d35_low_control_vs_experiment	chr11_67604996_67605884	39.8671244309291	-2.86163604717494	0.000174454699619447	0.0151065107835791	Promoter (<=1kb)	NDUFV1
d35_low_control_vs_experiment	chr11_67621501_67622389	29.9366634839965	-2.80946608537414	0.00129509690252681	0.040075224757584	Distal Intergenic	DOC2GP
d35_low_control_vs_experiment	chr11_68158906_68160800	68.4978841787355	-3.21551051054002	0.000420512421256661	0.0229023363582046	3' UTR	KMT5B
d35_low_control_vs_experiment	chr11_69122527_69123613	48.25115930145	-1.43729659644044	0.00197621683515951	0.0488288618910837	Intron (ENST00000637504.1/219931, intron 19 of 19)	SMIM38
d35_low_control_vs_experiment	chr11_70824636_70825551	23.0427532612655	-2.01838489917126	0.00152010618073334	0.0430582177536725	Promoter (1-2kb)	SHANK2
d35_low_control_vs_experiment	chr11_71131463_71132593	36.3288146463752	-3.05415280162861	0.000215408548579627	0.0167398850860568	Intron (ENST00000601538.6/22941, intron 3 of 25)	SHANK2
d35_low_control_vs_experiment	chr11_71709239_71711046	55.2117828193436	-2.0939801252499	0.000401586588476118	0.022521549164646	Intron (ENST00000664227.1/285407, intron 3 of 3)	FAM86C1P
d35_low_control_vs_experiment	chr11_73443888_73444670	20.1047593535461	-3.12651158414969	0.00112101027050038	0.0373046538933379	Intron (ENST00000356467.5/23201, intron 2 of 7)	FAM168A
d35_low_control_vs_experiment	chr11_73645585_73646748	69.4129502476503	-3.00419826489308	2.15951775073506e-05	0.00636528442900486	Promoter (<=1kb)	PLEKHB1
d35_low_control_vs_experiment	chr11_75850316_75851538	32.3270002140408	-4.28446342344857	1.4102998689504e-06	0.00191463523381485	Intron (ENST00000356136.8/7405, intron 1 of 14)	UVRAG
d35_low_control_vs_experiment	chr11_7594852_7596425	69.3848493363401	-2.79054627953987	0.000145176923489513	0.0142367938474051	Promoter (<=1kb)	PPFIBP2
d35_low_control_vs_experiment	chr11_76120439_76121496	36.7530233331493	-2.67725637573475	0.00143363798727415	0.0420346460770404	Intron (ENST00000356136.8/7405, intron 14 of 14)	UVRAG
d35_low_control_vs_experiment	chr11_7612478_7613314	35.0795283441492	-3.19412221592683	2.42639991759802e-05	0.0065484482515785	Intron (ENST00000684123.1/8495, intron 6 of 26)	PPFIBP2
d35_low_control_vs_experiment	chr11_76269904_76271178	27.4800347267237	-2.78289835759373	0.000949711985802787	0.0343103711285278	Distal Intergenic	LINC02761
d35_low_control_vs_experiment	chr11_76455267_76456129	46.85866523327	-2.14435343171633	0.000352187020111047	0.0211038620500007	Intron (ENST00000427574.6/56946, intron 5 of 9)	EMSY
d35_low_control_vs_experiment	chr11_76758984_76759643	16.0505915896277	-2.58375704037341	0.000299601262656832	0.0195858633374663	Distal Intergenic	TSKU
d35_low_control_vs_experiment	chr11_78365162_78365843	33.2538975986422	-2.5439406708458	0.000962490402620141	0.0345808723168912	Intron (ENST00000534168.1/ENST00000534168.1, intron 1 of 1)	GAB2
d35_low_control_vs_experiment	chr11_87966552_87967324	22.1565250693374	-2.97470563792331	0.00201247266706836	0.0491625286905314	Intron (ENST00000649399.1/23682, intron 1 of 3)	RAB38
d35_low_control_vs_experiment	chr12_104720755_104721390	20.7237828933941	-2.32441674912274	0.00015681137003651	0.0145510303708262	Intron (ENST00000303694.6/50515, intron 2 of 2)	NA
d35_low_control_vs_experiment	chr12_106527319_106528168	17.7784501170692	-3.02879893219253	0.000538040627382556	0.0258570835394127	Intron (ENST00000551505.4/100287944, intron 1 of 2)	RFX4
d35_low_control_vs_experiment	chr12_106862412_106863509	37.5616461153581	-4.39622897005606	7.54059666084711e-06	0.00405291993814363	Intron (ENST00000392839.6/55188, intron 8 of 8)	RIC8B
d35_low_control_vs_experiment	chr12_106884418_106886107	59.4544398253357	-2.86571416085067	0.000104680555451	0.0123158040118824	5' UTR	RIC8B
d35_low_control_vs_experiment	chr12_108271685_108272467	22.4275385157987	-2.89063395910596	0.000974267185128141	0.0348209021883946	Distal Intergenic	WSCD2
d35_low_control_vs_experiment	chr12_108656557_108658023	30.8601890080829	-3.06734515285984	0.0001669422175437	0.0148491063513413	Promoter (<=1kb)	CORO1C
d35_low_control_vs_experiment	chr12_108840035_108841564	63.3403990270162	-2.99533757556465	0.000233615618250552	0.0174613257618466	Intron (ENST00000326495.10/54434, intron 2 of 14)	MIR619
d35_low_control_vs_experiment	chr12_109695741_109696540	32.6182829404725	-4.23709884150457	1.31514322645374e-06	0.00191463523381485	Distal Intergenic	FAM222A
d35_low_control_vs_experiment	chr12_110108835_110109873	22.8868740861564	-2.49999805029061	8.44933197314707e-05	0.0112701493244306	Distal Intergenic	IFT81
d35_low_control_vs_experiment	chr12_110266469_110267707	42.6306555405283	-2.10536081139505	0.00136744707932871	0.041067594403236	Distal Intergenic	ATP2A2
d35_low_control_vs_experiment	chr12_111121825_111122861	19.4184897491884	-2.75001332524109	0.00174186465884695	0.0460497545752616	Intron (ENST00000261726.11/23316, intron 1 of 21)	CUX2
d35_low_control_vs_experiment	chr12_111597342_111597730	23.2668055838693	-1.64801874292244	0.000184012322199946	0.0154730465537486	Promoter (<=1kb)	ATXN2
d35_low_control_vs_experiment	chr12_111635596_111637328	69.5158622842962	-1.68250474177311	0.00024082909906364	0.0177573692654601	Distal Intergenic	ATXN2
d35_low_control_vs_experiment	chr12_116143807_116144429	17.784181703231	-2.08771847838121	0.000881872915162764	0.033044093878961	Intron (ENST00000281928.9/23389, intron 2 of 30)	MIR620
d35_low_control_vs_experiment	chr12_116601811_116602700	16.933385137218	-2.9171797738344	0.00152868584355334	0.0432116772155239	Intron (ENST00000550742.1/ENST00000550742.1, intron 1 of 1)	MAP1LC3B2
d35_low_control_vs_experiment	chr12_117052446_117053467	32.1067750975535	-1.37828946636431	0.00196803596134445	0.0487308525595626	Promoter (<=1kb)	TESC
d35_low_control_vs_experiment	chr12_11862741_11863510	17.073474847212	-3.47188596887876	0.000194677114985384	0.0159550526819326	Intron (ENST00000396373.9/2120, intron 4 of 7)	ETV6
d35_low_control_vs_experiment	chr12_119178404_119179399	64.6386159790435	-1.72521712513849	0.000799879909713364	0.0315041950429507	Promoter (<=1kb)	HSPB8
d35_low_control_vs_experiment	chr12_119338639_119339545	28.4929085419376	-2.23521814023093	8.25262932318113e-05	0.0111698789212734	Intron (ENST00000536742.5/160777, intron 1 of 2)	CCDC60
d35_low_control_vs_experiment	chr12_119678441_119679503	19.9408243569436	-2.86108568544507	0.00179499730239029	0.0467243237197957	Promoter (<=1kb)	PRKAB1
d35_low_control_vs_experiment	chr12_119749516_119750307	20.517375275103	-2.65114502770321	0.0014521461806087	0.0422886235180167	Promoter (1-2kb)	CIT
d35_low_control_vs_experiment	chr12_121576686_121577504	74.7774895600268	-2.01679442167839	6.55169490398662e-05	0.0100144991494389	Promoter (2-3kb)	KDM2B
d35_low_control_vs_experiment	chr12_121609984_121610866	28.1780737075201	-2.2826890785602	0.000419045199801505	0.0228561186517933	Distal Intergenic	ORAI1
d35_low_control_vs_experiment	chr12_121781619_121782623	32.7073803129302	-2.04185827121492	0.000422406097340024	0.022958508915542	3' UTR	RHOF
d35_low_control_vs_experiment	chr12_121858854_121859663	27.8902454157632	-1.94689198538372	0.00154557156736457	0.0434682967004825	Promoter (<=1kb)	HPD
d35_low_control_vs_experiment	chr12_124548851_124549552	28.1501829032721	-2.78654176138919	0.000133559139974878	0.0138017886080817	Intron (ENST00000405201.6/9612, intron 1 of 48)	NCOR2
d35_low_control_vs_experiment	chr12_124792872_124793559	18.7745190930331	-2.99808779808822	0.000129464393618507	0.0136231585716239	Intron (ENST00000657226.1/ENST00000657226.1, intron 2 of 2)	SCARB1
d35_low_control_vs_experiment	chr12_124807238_124808109	18.1424228751663	-2.9507877039864	0.000287744637617745	0.0193276195933367	3' UTR	SCARB1
d35_low_control_vs_experiment	chr12_128338343_128339539	27.3845406820267	-2.78961229660113	0.00144283709311553	0.0421236135215755	Intron (ENST00000435159.3/92293, intron 1 of 8)	MIR3612
d35_low_control_vs_experiment	chr12_128383162_128383999	26.0087919687183	-3.18023259245225	0.00103957130902163	0.0359332161482354	Intron (ENST00000435159.3/92293, intron 1 of 8)	MIR3612
d35_low_control_vs_experiment	chr12_130104417_130105295	36.3867513779322	-2.68327833618349	0.00200288494801267	0.0490615568261013	Distal Intergenic	LINC02419
d35_low_control_vs_experiment	chr12_130157974_130158457	20.4481980838289	-3.38550064451775	0.000492247776240979	0.0247482096867643	Intron (ENST00000505807.6/440119, intron 1 of 3)	FZD10-AS1
d35_low_control_vs_experiment	chr12_1918194_1918997	25.2608780564313	-2.60635249567245	0.000186288260934603	0.0156096894230737	Promoter (<=1kb)	CACNA2D4
d35_low_control_vs_experiment	chr12_19227026_19228411	54.9762291170342	-2.48618574326819	0.00144336949655317	0.0421309746736613	Intron (ENST00000429027.7/54477, intron 3 of 31)	PLEKHA5
d35_low_control_vs_experiment	chr12_21429806_21430661	21.4690023964698	-3.25362605102095	0.00029063321174404	0.0193959359212976	Distal Intergenic	PYROXD1
d35_low_control_vs_experiment	chr12_21644891_21645616	24.0481400681395	-2.63399326485037	0.00162329277878355	0.0444402635167798	Intron (ENST00000647960.1/2998, intron 3 of 22)	LDHB
d35_low_control_vs_experiment	chr12_2354064_2354851	19.8117383102932	-3.15387114298702	8.3652353698258e-05	0.011203680405443	Intron (ENST00000682544.1/775, intron 3 of 49)	CACNA1C-IT3
d35_low_control_vs_experiment	chr12_29640468_29641514	43.0404812737035	-1.87676935843063	0.000344829221264596	0.0209864180917411	Promoter (<=1kb)	TMTC1
d35_low_control_vs_experiment	chr12_3990051_3991155	51.9368726773272	-2.81624443077886	0.000444728532101457	0.0235815931527871	Distal Intergenic	LOC105369611
d35_low_control_vs_experiment	chr12_48768055_48768983	20.1227950731275	-2.32664837571663	0.000839813775126749	0.0322820463208868	3' UTR	MIR4701
d35_low_control_vs_experiment	chr12_49264285_49265805	125.803528419667	-1.80545716373854	0.000753078110271402	0.0305964941224873	Promoter (<=1kb)	TUBA1C
d35_low_control_vs_experiment	chr12_51894850_51895738	35.5092268336468	-1.93680079792771	0.000610578457336838	0.0273361436258351	Distal Intergenic	ANKRD33
d35_low_control_vs_experiment	chr12_53463913_53464858	19.6534395421583	-2.14713677105111	0.000416028783944438	0.0228207900250478	Promoter (<=1kb)	PCBP2-OT1
d35_low_control_vs_experiment	chr12_5478173_5478790	17.7526778010278	-2.93771185799168	0.00143911421330129	0.0421067400027485	Intron (ENST00000423158.4/4908, intron 1 of 1)	NTF3
d35_low_control_vs_experiment	chr12_5556823_5557576	18.4291561610997	-2.84696644799206	0.000371214184730251	0.0216793987255536	Intron (ENST00000536751.1/57101, intron 1 of 2)	ANO2
d35_low_control_vs_experiment	chr12_56596875_56597830	29.2472493088429	-2.72973551590116	0.000296842937440959	0.0195858633374663	3' UTR	BAZ2A
d35_low_control_vs_experiment	chr12_56634236_56634656	40.5510566852962	-1.49422081506926	0.0017362313125525	0.0459882142932361	Promoter (1-2kb)	BAZ2A
d35_low_control_vs_experiment	chr12_58745504_58746284	19.838207776866	-2.55646374132363	0.000881854330215642	0.033044093878961	Intron (ENST00000546977.5/100506869, intron 1 of 7)	LINC02388
d35_low_control_vs_experiment	chr12_6199485_6201104	91.0817704616224	-1.20652767790543	0.00112081249376901	0.0373046538933379	Promoter (<=1kb)	CD9
d35_low_control_vs_experiment	chr12_62724660_62725564	40.2478252680798	-2.75417581683781	8.59639769234896e-05	0.0113787073734766	Intron (ENST00000228705.7/57460, intron 5 of 9)	PPM1H
d35_low_control_vs_experiment	chr12_62817477_62818559	32.8421930678983	-2.91855070388319	0.000120955606734519	0.013062249699976	Intron (ENST00000228705.7/57460, intron 2 of 9)	PPM1H
d35_low_control_vs_experiment	chr12_62865909_62867181	29.4650829022941	-2.54286852705143	0.000809639947422046	0.0316621033028666	Intron (ENST00000228705.7/57460, intron 1 of 9)	PPM1H
d35_low_control_vs_experiment	chr12_6294792_6295750	29.93224911009	-2.59214479227666	0.000241301690849192	0.0177573692654601	Distal Intergenic	PLEKHG6
d35_low_control_vs_experiment	chr12_631948_632809	41.8613514216464	-2.92428020831469	6.31089192921804e-05	0.00988445655827738	Promoter (1-2kb)	NINJ2-AS1
d35_low_control_vs_experiment	chr12_69340531_69341537	19.6455478721889	-2.734146576411	0.00122480388251101	0.0390475823914626	Distal Intergenic	LYZ
d35_low_control_vs_experiment	chr12_7904642_7906777	67.8936166892747	-2.3894180171136	7.22816694882797e-05	0.0105697879044996	Distal Intergenic	SLC2A14
d35_low_control_vs_experiment	chr12_79637048_79637728	16.3253131117348	-2.42022574052799	0.000919670567254812	0.0337138786350733	Intron (ENST00000328827.9/5074, intron 2 of 6)	PAWR
d35_low_control_vs_experiment	chr12_8823075_8824341	34.9437364946282	-1.86576614842281	0.00185465465269645	0.0475149256113965	Promoter (<=1kb)	A2ML1
d35_low_control_vs_experiment	chr12_89385982_89386957	37.1528203679002	-2.5342336208255	0.00183944167923971	0.0473482997314571	Intron (ENST00000657284.1/ENST00000657284.1, intron 1 of 2)	DUSP6
d35_low_control_vs_experiment	chr12_89883660_89885523	112.286378288051	-2.08524409073971	0.00138778871685595	0.0413189421393088	Promoter (<=1kb)	LOC105369890
d35_low_control_vs_experiment	chr12_93698971_93700102	22.7301220367817	-2.35073018580827	0.000690767725702748	0.0292428931243234	Intron (ENST00000552983.5/8738, intron 2 of 2)	CRADD
d35_low_control_vs_experiment	chr12_94433069_94434296	24.6053140122952	-2.82331207171642	0.000367145181121815	0.0215927618748579	5' UTR	CEP83
d35_low_control_vs_experiment	chr12_96810164_96811544	74.4534504463928	-3.48529887179718	8.199448608766e-05	0.0111243872934364	Intron (ENST00000524981.9/144535, intron 63 of 67)	NEDD1
d35_low_control_vs_experiment	chr12_97004701_97006055	45.6112027636032	-2.75069943434429	0.00045401942356567	0.0237723684595992	Intron (ENST00000552238.1/ENST00000552238.1, intron 1 of 1)	NEDD1
d35_low_control_vs_experiment	chr12_97385836_97386886	76.0041326172834	-3.05758053313916	0.000405935946854138	0.0226033762529821	Distal Intergenic	RMST
d35_low_control_vs_experiment	chr12_97476260_97476763	19.403955192133	-3.13641752534401	0.00105072445954007	0.0361276656862675	Intron (ENST00000640149.1/196475, intron 5 of 13)	RMST
d35_low_control_vs_experiment	chr12_97532206_97533210	23.5208160845489	-3.37683120911016	0.000440397552311308	0.023478603815044	Promoter (1-2kb)	RMST
d35_low_control_vs_experiment	chr13_111210170_111210982	31.8747382714856	-2.54998854436833	0.000301580217735747	0.0195858633374663	Intron (ENST00000317133.9/8874, intron 4 of 18)	ARHGEF7
d35_low_control_vs_experiment	chr13_111212002_111212664	28.6647084919541	-2.31013789707629	0.0011935224219169	0.0385096067985957	Intron (ENST00000317133.9/8874, intron 4 of 18)	ARHGEF7
d35_low_control_vs_experiment	chr13_112905923_112906748	40.9822397094756	-2.20944525281881	6.18143142469685e-05	0.00985578292291853	Intron (ENST00000375608.7/23263, intron 2 of 29)	MCF2L
d35_low_control_vs_experiment	chr13_113177820_113180086	69.3012112506313	-2.65577501640628	4.2867803643369e-06	0.00310424673814822	Promoter (<=1kb)	PCID2
d35_low_control_vs_experiment	chr13_113612363_113613062	16.4378507322935	-3.09834418550821	0.00153818022716416	0.0433658932198897	Intron (ENST00000475254.5/7027, intron 4 of 6)	TFDP1
d35_low_control_vs_experiment	chr13_24135563_24136361	20.899878167182	-3.97212596617099	1.24948441619373e-05	0.00506276940335101	Intron (ENST00000382141.4/221178, intron 3 of 15)	SPATA13
d35_low_control_vs_experiment	chr13_29520532_29521348	16.4948801573198	-3.15315995887406	0.000244699239454585	0.017839191644525	Promoter (1-2kb)	SLC7A1
d35_low_control_vs_experiment	chr13_29551558_29552340	16.4950010175254	-2.94945110019075	0.000897889851538955	0.0332908497587757	Intron (ENST00000380752.10/6541, intron 2 of 12)	SLC7A1
d35_low_control_vs_experiment	chr13_29564019_29564719	16.6494285653886	-2.51529170986745	0.0010467312286474	0.0360398240830096	Intron (ENST00000380752.10/6541, intron 1 of 12)	SLC7A1
d35_low_control_vs_experiment	chr13_33193508_33194195	17.8548302263474	-1.77042368402621	0.000707785011087244	0.0296703239798355	Intron (ENST00000628131.2/100874241, intron 2 of 5)	STARD13
d35_low_control_vs_experiment	chr13_35469765_35470329	16.1365138083302	-2.63000483661704	0.00168773034636869	0.0453373953391483	Promoter (<=1kb)	NBEA
d35_low_control_vs_experiment	chr13_36696399_36697159	31.7922551384951	-3.20755976013567	0.000167135792093594	0.0148491063513413	3' UTR	SERTM1
d35_low_control_vs_experiment	chr13_43054620_43055729	44.1321128035736	-1.74834549206124	0.000757091100062042	0.0306853071556992	Intron (ENST00000474320.1/29103, intron 1 of 3)	DNAJC15
d35_low_control_vs_experiment	chr13_43664784_43665608	24.5337976295661	-2.58693227522372	0.000647897353040351	0.0282960980812872	Intron (ENST00000690772.1/55068, intron 2 of 16)	ENOX1
d35_low_control_vs_experiment	chr13_44116944_44118179	33.8412255739088	-2.29695658336426	0.00164610703796305	0.0446584788014016	Intron (ENST00000618753.4/101929212, intron 1 of 3)	SMIM2-AS1
d35_low_control_vs_experiment	chr13_51328312_51328960	34.3627636367586	-2.31164297932061	0.000541316576312524	0.0259207107464594	Distal Intergenic	SERPINE3
d35_low_control_vs_experiment	chr13_90485088_90486091	21.300037660129	-2.26447203792138	0.000646205744199312	0.0282450288154514	Distal Intergenic	LINC01049
d35_low_control_vs_experiment	chr13_95270882_95272000	52.47747311802	-2.05995487811082	0.00127970379776564	0.0397955054611335	Intron (ENST00000645237.2/10257, intron 1 of 30)	ABCC4
d35_low_control_vs_experiment	chr14_100409478_100410643	25.1705465763006	-2.48996107938958	0.000536364661558812	0.0258505611507524	Promoter (2-3kb)	LOC105370664
d35_low_control_vs_experiment	chr14_101359514_101360276	16.847764205196	-3.04149329071258	0.000542266982036089	0.0259207107464594	Distal Intergenic	LINC00524
d35_low_control_vs_experiment	chr14_101364997_101365868	35.1949149772955	-2.58728823956184	0.00117364159411961	0.0381878079298766	Distal Intergenic	LINC00524
d35_low_control_vs_experiment	chr14_101587180_101588069	36.9310026678907	-4.585012996559	1.07553632542239e-06	0.0017384946034314	Intron (ENST00000700197.1/64150, intron 2 of 8)	DIO3OS
d35_low_control_vs_experiment	chr14_102046191_102046918	55.0673628181505	-1.71842723148259	0.00183427570250891	0.0472882001337082	Promoter (<=1kb)	DYNC1H1
d35_low_control_vs_experiment	chr14_21275210_21276043	23.2231264226587	-3.02652641100725	0.00150513708749417	0.0428928403180211	Distal Intergenic	RPGRIP1
d35_low_control_vs_experiment	chr14_22899474_22900605	34.2485454450706	-1.49717360475981	0.00158607506268504	0.0440734414152121	Promoter (1-2kb)	RBM23
d35_low_control_vs_experiment	chr14_23166985_23167876	46.1139180704817	-3.34830887406009	2.35836199674702e-05	0.00650334054266023	Intron (ENST00000316902.12/23428, intron 1 of 10)	SLC7A8
d35_low_control_vs_experiment	chr14_26196750_26197648	19.4530547965841	-3.84493074661024	6.53544942467121e-05	0.0100144991494389	Distal Intergenic	LINC02306
d35_low_control_vs_experiment	chr14_50225317_50226022	17.0887521635395	-2.3948662667013	0.0019409610557056	0.0484739841654297	Intron (ENST00000216373.10/6655, intron 1 of 22)	SOS2
d35_low_control_vs_experiment	chr14_53880902_53881692	18.9265176356789	-3.11404709513483	0.000611196451760074	0.0273361436258351	Intron (ENST00000649040.1/ENST00000649040.1, intron 2 of 2)	LINC02331
d35_low_control_vs_experiment	chr14_53956373_53957190	56.3697660080035	-1.57753435254582	0.000983831150486281	0.0350202658285971	Promoter (<=1kb)	BMP4
d35_low_control_vs_experiment	chr14_54662539_54663985	57.6116925763493	-3.2731339929216	0.000161335220947448	0.0146766343957069	Intron (ENST00000554335.6/23034, intron 2 of 12)	SAMD4A
d35_low_control_vs_experiment	chr14_55902294_55903339	37.8812255882238	-3.03855096952997	0.00168674620936521	0.0453373953391483	Intron (ENST00000664335.1/102723670, intron 1 of 4)	LOC102723670
d35_low_control_vs_experiment	chr14_56501762_56502516	17.3420976364065	-3.36594509962227	0.000115480792922743	0.0127926677937446	Intron (ENST00000556810.5/54916, intron 2 of 3)	LOC101927690
d35_low_control_vs_experiment	chr14_57291793_57292849	66.2885364788937	-2.44556734602982	0.00161339498390527	0.0443588362370763	3' UTR	AP5M1
d35_low_control_vs_experiment	chr14_61684228_61684873	18.1948886665971	-3.28164646454597	0.000990045806917211	0.0351400725434528	Intron (ENST00000557544.2/100750246, intron 1 of 1)	HIF1A
d35_low_control_vs_experiment	chr14_63672174_63673402	33.4259051728722	-3.04513924537342	0.000741825682418776	0.0304021116983649	Distal Intergenic	LOC105370532
d35_low_control_vs_experiment	chr14_64186138_64187179	36.6912435026823	-1.89269785868526	0.00111784719703387	0.0372671667488349	Exon (ENST00000358025.7/23224, exon 97 of 116)	SYNE2
d35_low_control_vs_experiment	chr14_67566657_67567386	16.1958817680584	-3.05005481480787	0.000195043665962289	0.0159550526819326	Promoter (1-2kb)	PLEKHH1
d35_low_control_vs_experiment	chr14_68042158_68043405	67.4622239042181	-2.40922986474877	9.79780892128065e-05	0.0119824395091217	Intron (ENST00000479335.5/5890, intron 8 of 11)	RAD51B
d35_low_control_vs_experiment	chr14_68139797_68140724	40.6792705609023	-1.960626509009	0.00148131420187094	0.0425812712955084	Intron (ENST00000479335.5/5890, intron 8 of 11)	LOC105370546
d35_low_control_vs_experiment	chr14_68172181_68173335	27.9256276151389	-3.65659271921351	0.000105048102898024	0.0123377082081561	Intron (ENST00000479335.5/5890, intron 8 of 11)	LOC105370546
d35_low_control_vs_experiment	chr14_68291730_68292984	44.8192596360414	-2.48641078604641	0.00116931383094423	0.0381460060535687	3' UTR	RAD51B
d35_low_control_vs_experiment	chr14_68295022_68296023	65.9325610372921	-3.31923441502014	0.000165734285334053	0.014796980385514	Intron (ENST00000479335.5/5890, intron 9 of 11)	RAD51B
d35_low_control_vs_experiment	chr14_68413644_68414697	30.9704808675138	-3.42197140972846	0.000193793495963902	0.0159104354346115	Promoter (2-3kb)	RAD51B
d35_low_control_vs_experiment	chr14_68458718_68459588	36.9623729964352	-2.83684430703854	0.000335052640606119	0.0206252203927579	Intron (ENST00000479335.5/5890, intron 10 of 11)	RAD51B
d35_low_control_vs_experiment	chr14_68468986_68470009	32.8185996437016	-2.61467601980877	0.000292411633405581	0.0194069663539488	Promoter (2-3kb)	RAD51B
d35_low_control_vs_experiment	chr14_68939689_68940549	52.2499487715724	-1.96651253471321	9.57187569321673e-05	0.0118427342681712	Promoter (1-2kb)	ACTN1
d35_low_control_vs_experiment	chr14_68947645_68948400	23.1240894173801	-2.02138651232909	0.000738693824156447	0.0303482233168401	Promoter (<=1kb)	ACTN1
d35_low_control_vs_experiment	chr14_69055959_69056812	31.6599310836687	-1.49909226126856	0.00193235849755809	0.048429775115942	Intron (ENST00000341516.10/8816, intron 8 of 8)	DCAF5
d35_low_control_vs_experiment	chr14_69137977_69139131	35.630333430569	-3.16812790791363	7.25722016695016e-06	0.00398153876495176	Intron (ENST00000341516.10/8816, intron 1 of 8)	DCAF5
d35_low_control_vs_experiment	chr14_69671530_69672364	16.6543426024722	-2.363552442602	0.000667499934501905	0.0287747009902057	Intron (ENST00000342745.5/9766, intron 2 of 5)	SUSD6
d35_low_control_vs_experiment	chr14_71646905_71647832	41.0823061553883	-3.77188581703293	7.35308995830279e-05	0.0106591441464018	Intron (ENST00000381232.8/26037, intron 7 of 23)	SIPA1L1
d35_low_control_vs_experiment	chr14_72617255_72618047	33.6221029210657	-1.53380254245848	0.00191145244467579	0.0481591773218544	3' UTR	DPF3
d35_low_control_vs_experiment	chr14_74154609_74156119	27.0263976835694	-2.28986881942695	0.00191595200329963	0.0481906899386168	Intron (ENST00000554938.2/91750, intron 4 of 4)	LIN52
d35_low_control_vs_experiment	chr14_74246193_74246967	16.8259241474119	-2.62315968393259	0.000651953691721741	0.0283907701935315	Intron (ENST00000261980.3/338917, intron 3 of 4)	VSX2
d35_low_control_vs_experiment	chr14_74571704_74573061	48.4804526494414	-2.39033811384634	0.000270257899287735	0.0187128670764016	Intron (ENST00000261978.9/4053, intron 3 of 35)	LTBP2
d35_low_control_vs_experiment	chr14_75242392_75243196	48.7014434858167	-2.43505662798844	0.000196259938429081	0.01600544286908	Intron (ENST00000553510.1/ENST00000553510.1, intron 1 of 1)	FOS
d35_low_control_vs_experiment	chr14_75711596_75712360	48.8105968340299	-2.09879713606176	0.000128889490059103	0.013587175731511	Exon (ENST00000556173.5/23093, exon 8 of 8)	TTLL5
d35_low_control_vs_experiment	chr14_76413547_76415026	44.1859373796987	-1.48268368485855	0.000835646740997103	0.0321768945544031	Intron (ENST00000512784.6/2103, intron 1 of 6)	ESRRB
d35_low_control_vs_experiment	chr14_77075946_77076835	32.8942079366194	-2.46346350243463	0.000103103899851798	0.012212693482391	Promoter (<=1kb)	LINC02289
d35_low_control_vs_experiment	chr14_77344157_77345006	22.3516891528913	-3.64394196972125	0.0002594028439049	0.0183073861549315	Intron (ENST00000216468.8/283578, intron 3 of 5)	GSTZ1
d35_low_control_vs_experiment	chr14_77542324_77543277	33.6193712695899	-2.32872422564931	0.000507869850847565	0.0250754797034052	Intron (ENST00000216484.7/9517, intron 9 of 11)	SPTLC2
d35_low_control_vs_experiment	chr14_90979057_90980040	26.8000937947567	-2.40933556119369	0.00150251164284751	0.0428505146482741	Promoter (<=1kb)	RPS6KA5
d35_low_control_vs_experiment	chr14_94904023_94905212	27.7504594030162	-3.08564470012514	2.99308608515954e-05	0.00711923521758874	Distal Intergenic	LINC02279
d35_low_control_vs_experiment	chr14_95265171_95266107	50.1457135602642	-3.02782874038998	0.000291077190570427	0.0193959359212976	Intron (ENST00000298912.9/79789, intron 1 of 12)	CLMN
d35_low_control_vs_experiment	chr14_96888244_96889436	43.8565559404969	-2.12213651871521	0.000371413519674486	0.0216826164446863	Intron (ENST00000681598.1/7443, intron 8 of 9)	VRK1
d35_low_control_vs_experiment	chr14_97023449_97024488	30.6378481931961	-3.43920154327953	0.000286578068842266	0.0192900792033367	Distal Intergenic	LINC00618
d35_low_control_vs_experiment	chr14_97035813_97036617	21.9621636892939	-3.89762973837063	3.03043013314682e-05	0.00718532192058826	Distal Intergenic	LINC00618
d35_low_control_vs_experiment	chr14_97076869_97077894	25.4806258279663	-2.40333841758616	0.000469689512442815	0.0242217001078988	Distal Intergenic	LINC02304
d35_low_control_vs_experiment	chr14_99518349_99518800	17.0937437343198	-1.89982911447061	0.00207400641094305	0.0499614119485346	Intron (ENST00000555049.5/8812, intron 10 of 10)	CCDC85C
d35_low_control_vs_experiment	chr14_99522208_99523664	60.9005609495613	-1.69504565533898	0.000130257289235124	0.0136281304295771	Promoter (<=1kb)	CCDC85C
d35_low_control_vs_experiment	chr14_99910352_99911384	28.4380575577355	-3.04092669179456	0.000194283249397836	0.0159355151817001	Intron (ENST00000327921.13/2009, intron 13 of 22)	EML1
d35_low_control_vs_experiment	chr15_100241535_100242728	27.0799746094341	-2.53797565302518	8.01031701107083e-05	0.0110698035304127	Intron (ENST00000268070.9/170691, intron 7 of 21)	ADAMTS17
d35_low_control_vs_experiment	chr15_101019240_101020063	27.0045108219595	-3.02926547641033	0.000162078475127152	0.0146950824930574	Promoter (1-2kb)	LRRK1
d35_low_control_vs_experiment	chr15_101242843_101243683	20.7026403503441	-2.20943894347316	0.000390104937197339	0.0222046666733018	Promoter (<=1kb)	CHSY1
d35_low_control_vs_experiment	chr15_101491685_101492753	31.0875270380612	-3.29459447805268	0.000140751884694662	0.0140775296518464	Promoter (1-2kb)	PCSK6
d35_low_control_vs_experiment	chr15_33776919_33777848	26.7439683232254	-3.19110577348318	0.000713363096365925	0.0297806957190821	Intron (ENST00000415757.7/6263, intron 64 of 102)	RYR3
d35_low_control_vs_experiment	chr15_33884412_33885131	16.6163311705727	-3.14752442454475	0.000733633357721575	0.0302107277741152	Promoter (<=1kb)	AVEN
d35_low_control_vs_experiment	chr15_34994671_34995970	27.653984490888	-3.53985232119877	9.83107209463092e-06	0.00456418883275358	Promoter (1-2kb)	LOC105370764
d35_low_control_vs_experiment	chr15_40091831_40093600	159.089381827847	-1.43777144392259	0.000767201675084692	0.0308615445028382	Exon (ENST00000354670.9/90427, exon 5 of 5)	BMF
d35_low_control_vs_experiment	chr15_40798187_40799183	37.1380277811244	-2.9980460555764	0.000843097140756935	0.0323477737836361	Intron (ENST00000220496.9/55192, intron 1 of 10)	ZFYVE19
d35_low_control_vs_experiment	chr15_42457301_42458388	74.5569939983666	-2.60178969397101	4.36368278039646e-05	0.00847418231198277	Promoter (<=1kb)	ZNF106
d35_low_control_vs_experiment	chr15_45154189_45155045	26.2032896461344	-3.04534232340719	0.000442073780851807	0.0235238021616099	Promoter (<=1kb)	DUOX1
d35_low_control_vs_experiment	chr15_51846089_51847339	23.1981663394579	-2.48679796827855	0.000832837795155394	0.0321298970350102	Intron (ENST00000558455.1/29766, intron 2 of 2)	TMOD3
d35_low_control_vs_experiment	chr15_52653036_52653857	29.3120306235908	-2.67818703092901	0.000287057423434985	0.0192900792033367	Promoter (<=1kb)	ATOSA
d35_low_control_vs_experiment	chr15_52879115_52880354	18.0347592672387	-2.65710820562727	0.00112793103058258	0.0374168164368159	Distal Intergenic	LOC101928499
d35_low_control_vs_experiment	chr15_57205356_57206405	24.2941947440941	-2.50123487161729	0.0015582563052362	0.043662800012396	Intron (ENST00000438423.6/6938, intron 8 of 20)	TCF12
d35_low_control_vs_experiment	chr15_58397966_58398854	20.7103128567092	-2.22963181313734	0.00180024375891359	0.046779886440568	Intron (ENST00000558239.5/8854, intron 2 of 3)	LIPC
d35_low_control_vs_experiment	chr15_58683984_58685050	46.0768137545684	-2.46853282474468	0.000173117817747359	0.0150427375450126	Intron (ENST00000260408.8/102, intron 2 of 15)	ADAM10
d35_low_control_vs_experiment	chr15_62853807_62854463	20.1706194502372	-3.14243755229176	0.000727945955563128	0.0300710293404856	Intron (ENST00000557994.1/105370854, intron 1 of 3)	LOC105370854
d35_low_control_vs_experiment	chr15_62874780_62875768	39.2977186434704	-2.48257496929097	0.00041288686198757	0.0227683029053058	Intron (ENST00000557994.1/105370854, intron 1 of 3)	LOC105370854
d35_low_control_vs_experiment	chr15_62896557_62897658	71.4522982833185	-2.06747917686719	0.000602428155394982	0.0271137761855541	Intron (ENST00000557900.1/ENST00000557900.1, intron 1 of 1)	LOC105370854
d35_low_control_vs_experiment	chr15_62992155_62993632	50.17695584995	-3.24991528930681	4.03721270500075e-05	0.00826756618479767	Distal Intergenic	TPM1
d35_low_control_vs_experiment	chr15_63013157_63013930	27.9026554616193	-2.55269543096875	0.000658874169992213	0.028604347219967	Distal Intergenic	TPM1
d35_low_control_vs_experiment	chr15_63553091_63553913	29.2072064779707	-2.52086692416358	0.00015128908423635	0.0143941392060812	Promoter (<=1kb)	USP3
d35_low_control_vs_experiment	chr15_64191804_64192840	26.3432661318388	-2.15129692123587	0.000588119824510587	0.0267582059986543	Intron (ENST00000303052.13/53944, intron 10 of 11)	CSNK1G1
d35_low_control_vs_experiment	chr15_64315117_64315852	34.4212868964462	-2.50309878600238	0.000870009654790164	0.0328438476535237	Promoter (1-2kb)	CSNK1G1
d35_low_control_vs_experiment	chr15_64699814_64700530	54.6911898635529	-1.782433009574	5.79469219607403e-05	0.00959347031249812	Promoter (<=1kb)	OAZ2
d35_low_control_vs_experiment	chr15_64979150_64979929	33.1864886215313	-2.23918946370267	0.000110022483940854	0.0125868568481041	Promoter (1-2kb)	SPG21
d35_low_control_vs_experiment	chr15_65405787_65406172	16.0823903799778	-2.6701841354207	8.10095208288701e-05	0.0110785130929225	Intron (ENST00000352385.3/57722, intron 3 of 19)	IGDCC4
d35_low_control_vs_experiment	chr15_65416579_65417421	56.673887864687	-2.36614404458744	9.37088000718713e-05	0.011773199798442	Intron (ENST00000352385.3/57722, intron 1 of 19)	IGDCC4
d35_low_control_vs_experiment	chr15_65443133_65444235	36.8040551203596	-2.61435603821788	0.000788877731270763	0.0312545313819034	3' UTR	DPP8
d35_low_control_vs_experiment	chr15_65532979_65533858	20.2691198994022	-3.19343980447395	7.81638154731331e-05	0.0109730679967804	Promoter (1-2kb)	HACD3
d35_low_control_vs_experiment	chr15_66802117_66803689	93.9448301582214	-2.07542816130119	3.16227043548923e-05	0.00736303940001109	Distal Intergenic	SMAD6
d35_low_control_vs_experiment	chr15_66883199_66884009	60.7790635146625	-2.58841118547538	0.000658074603360866	0.0285923083089863	Distal Intergenic	LINC02206
d35_low_control_vs_experiment	chr15_66931434_66932448	40.6522299093022	-3.11499511869224	3.39003082819084e-06	0.00280003507828455	Exon (ENST00000559904.1/ENST00000559904.1, exon 2 of 2)	LINC02206
d35_low_control_vs_experiment	chr15_67068070_67068578	22.352035630256	-1.91121574484541	0.00194643012182801	0.0485638353632855	Promoter (<=1kb)	SMAD3
d35_low_control_vs_experiment	chr15_67781594_67783028	49.6184336231189	-1.82548844994409	0.000368570550720488	0.0216267293656012	Intron (ENST00000178640.10/5607, intron 21 of 21)	MAP2K5
d35_low_control_vs_experiment	chr15_67843609_67844483	76.9598520242861	-2.7111419672101	2.62280261442792e-05	0.0066788375233606	Intron (ENST00000558889.5/390598, intron 2 of 2)	RNU6-1
d35_low_control_vs_experiment	chr15_67884325_67885274	60.0863053260931	-1.69774868945168	0.000413129214283292	0.0227683029053058	Distal Intergenic	RNU6-1
d35_low_control_vs_experiment	chr15_67914853_67916147	47.9111879129494	-2.46564413335316	1.51977289932336e-05	0.00546554691604747	Distal Intergenic	RNU6-1
d35_low_control_vs_experiment	chr15_67961174_67962358	26.6850553733495	-2.52211434019204	4.59132203155803e-05	0.00856786060175289	Distal Intergenic	PIAS1
d35_low_control_vs_experiment	chr15_67967745_67969448	85.347166300626	-1.77693372309435	1.9599347146393e-06	0.00223202413619812	Distal Intergenic	PIAS1
d35_low_control_vs_experiment	chr15_68106440_68107272	22.1861882504623	-3.12348936151556	0.00022562800946286	0.0171821329901238	Intron (ENST00000564915.5/8554, intron 3 of 4)	PIAS1
d35_low_control_vs_experiment	chr15_68875180_68876306	66.7688394817564	-2.20154619502921	7.57304835456943e-09	0.000113841849390065	Intron (ENST00000560188.1/246777, intron 1 of 1)	NOX5
d35_low_control_vs_experiment	chr15_68991129_68992213	22.5245625935826	-2.3111705893172	0.00148174043004693	0.0425812712955084	Intron (ENST00000557966.1/79400, intron 2 of 3)	NOX5
d35_low_control_vs_experiment	chr15_69703047_69704061	23.6260246699568	-2.79119862069324	0.0019785284478291	0.048861884166241	Exon (ENST00000558941.6/104472713, exon 5 of 5)	PCAT29
d35_low_control_vs_experiment	chr15_69825698_69827013	50.825695893952	-2.38053579004077	0.000242043196133433	0.0177573692654601	Promoter (2-3kb)	LINC00593
d35_low_control_vs_experiment	chr15_70063187_70064149	43.9001883031128	-2.83548857818189	0.000194310988378888	0.0159355151817001	Intron (ENST00000451782.7/7090, intron 8 of 19)	TLE3
d35_low_control_vs_experiment	chr15_70083048_70083993	29.2567515546061	-2.29025324853899	2.24808744342748e-05	0.00641864404376149	Intron (ENST00000451782.7/7090, intron 4 of 19)	MIR629
d35_low_control_vs_experiment	chr15_70494178_70495602	45.0491742911962	-2.4404230212491	3.63137647378106e-06	0.00288828925090549	Distal Intergenic	LINC02205
d35_low_control_vs_experiment	chr15_70584740_70585821	44.6662125444138	-1.24099001443979	0.00178768866912889	0.0466361455865945	Promoter (<=1kb)	LINC02204
d35_low_control_vs_experiment	chr15_70701677_70702697	22.6639729395005	-2.31085194772331	0.000151413604469203	0.0143941392060812	Promoter (<=1kb)	UACA
d35_low_control_vs_experiment	chr15_72228387_72229063	50.9646074130599	-2.27970829417716	5.28158448991543e-06	0.00337852846147462	Promoter (<=1kb)	PKM
d35_low_control_vs_experiment	chr15_72242446_72243559	47.0335496994772	-3.87199876974842	6.35663393115527e-06	0.00376205116417684	Promoter (2-3kb)	PARP6
d35_low_control_vs_experiment	chr15_73686678_73687161	20.4854615603688	-2.58514958545144	4.94420846658494e-05	0.00887978659186835	Promoter (1-2kb)	CD276
d35_low_control_vs_experiment	chr15_74531160_74532034	33.4570948448509	-2.46548370111229	0.00013741462185504	0.0139197122846084	Distal Intergenic	ARID3B
d35_low_control_vs_experiment	chr15_75831352_75832270	28.1146786460011	-2.21247129635449	0.00159229765203082	0.0441139226947167	Distal Intergenic	UBE2Q2
d35_low_control_vs_experiment	chr15_76951133_76951969	23.0831432526408	-2.05384098383772	0.00132447823672494	0.040467924986926	3' UTR	RCN2
d35_low_control_vs_experiment	chr15_77266623_77267441	24.0121129770849	-3.16610974156778	8.98644207865919e-05	0.0115536899775777	Intron (ENST00000560626.6/79834, intron 2 of 6)	PEAK1
d35_low_control_vs_experiment	chr15_77475700_77476388	16.1216714212724	-2.77271409430282	0.000688139391491009	0.0291968823104392	Promoter (1-2kb)	HMG20A
d35_low_control_vs_experiment	chr15_77533490_77534450	42.9387786951543	-2.54628572147412	4.35820984875096e-05	0.00847418231198277	Exon (ENST00000561283.2/101929457, exon 2 of 2)	LOC101929457
d35_low_control_vs_experiment	chr15_77944006_77944965	54.5593672622519	-1.4423441487877	0.000951975617476836	0.0343302106470898	Promoter (<=1kb)	COMMD4P1
d35_low_control_vs_experiment	chr15_78357950_78358685	25.3763668610004	-3.42388966131657	1.17510913438158e-05	0.00496203035466042	Distal Intergenic	CRABP1
d35_low_control_vs_experiment	chr15_78359036_78359737	17.6909575386149	-2.53422110139887	0.000675495003315524	0.0289463473128296	Distal Intergenic	CRABP1
d35_low_control_vs_experiment	chr15_78944135_78945499	86.6149920660698	-1.58000135768042	0.000102380940074741	0.0121872511901379	Promoter (<=1kb)	CTSH
d35_low_control_vs_experiment	chr15_79212667_79213374	24.4985285199746	-3.26924199474705	0.000135951538143216	0.0138822465920786	Promoter (2-3kb)	MIR184
d35_low_control_vs_experiment	chr15_79853466_79854329	32.4271927476335	-2.19797893860529	2.84640448529421e-06	0.00265869193022838	Intron (ENST00000258874.4/10588, intron 2 of 2)	MTHFS
d35_low_control_vs_experiment	chr15_81418968_81419958	28.6178930746758	-1.55565364755391	0.00151790628106635	0.0430274214603482	Exon (ENST00000667509.1/101929655, exon 7 of 7)	TMC3
d35_low_control_vs_experiment	chr15_82832028_82833234	30.7168812068691	-2.86679346928079	9.34708693553963e-05	0.011762187533752	Exon (ENST00000286760.5/123720, exon 10 of 10)	WHAMM
d35_low_control_vs_experiment	chr15_82985666_82986700	82.8748420448512	-1.37661214629726	7.17675256763967e-05	0.0105048230742983	Promoter (<=1kb)	RAMAC
d35_low_control_vs_experiment	chr15_85443491_85445019	44.4436164219474	-2.29505927072564	0.000405629809378629	0.0226033762529821	Intron (ENST00000559362.5/11214, intron 1 of 14)	AKAP13
d35_low_control_vs_experiment	chr15_85494155_85494963	25.754167397946	-2.89689893354007	0.000134814886043593	0.0138429287872289	Intron (ENST00000559362.5/11214, intron 2 of 14)	AKAP13
d35_low_control_vs_experiment	chr15_85786091_85787200	34.7123902664964	-1.97433624850541	0.000455352593686495	0.0238090012681469	Intron (ENST00000337975.6/64410, intron 1 of 2)	KLHL25
d35_low_control_vs_experiment	chr15_86076331_86077016	18.5747058176159	-3.99372565288901	1.28188155179631e-05	0.00511048755426919	Promoter (2-3kb)	AGBL1
d35_low_control_vs_experiment	chr15_86089235_86090052	27.2954064614733	-2.41273169328151	0.00141630122176867	0.0417379888575525	Intron (ENST00000614907.3/123624, intron 1 of 22)	AGBL1
d35_low_control_vs_experiment	chr15_86382076_86383099	28.124729636536	-2.64463915600068	0.00148524999822684	0.0426013268057627	Intron (ENST00000614907.3/123624, intron 17 of 22)	AGBL1-AS1
d35_low_control_vs_experiment	chr15_87763939_87765442	78.5668425228206	-2.89444076668294	4.28792029947753e-05	0.00845211181320656	Distal Intergenic	LOC102724465
d35_low_control_vs_experiment	chr15_88435547_88436183	21.0817508505237	-2.15553836585439	0.0016988668636732	0.045510099938613	Distal Intergenic	MRPL46
d35_low_control_vs_experiment	chr15_89114749_89115397	20.6467388582359	-2.56996965735603	0.00094381264093283	0.0342206066686512	Promoter (1-2kb)	ABHD2
d35_low_control_vs_experiment	chr15_90400778_90401328	25.9092919988139	-2.32545067313974	0.000772059249216304	0.0309481101915878	Intron (ENST00000268182.10/8826, intron 2 of 37)	IQGAP1
d35_low_control_vs_experiment	chr15_92320099_92320752	17.5159573628579	-2.7668307478045	0.000557548685631048	0.0262162984571433	Intron (ENST00000561674.1/ENST00000561674.1, intron 1 of 3)	ST8SIA2
d35_low_control_vs_experiment	chr15_92413354_92414249	30.5152168611036	-2.47144199691001	0.000730806798286561	0.0301261275572528	Intron (ENST00000268164.8/8128, intron 1 of 5)	ST8SIA2
d35_low_control_vs_experiment	chr15_92499367_92500604	35.5908693898256	-2.37140565950483	0.00172724804842109	0.0459148652305747	Exon (ENST00000624458.1/145858, exon 3 of 3)	C15orf32
d35_low_control_vs_experiment	chr15_92821879_92823023	44.982140514158	-2.25127093855903	0.00016384020850284	0.0147304302291803	Promoter (2-3kb)	CHASERR
d35_low_control_vs_experiment	chr15_92880455_92880964	19.7429987250762	-2.25816194689213	0.00100461560265537	0.0354254845107127	Promoter (1-2kb)	CHASERR
d35_low_control_vs_experiment	chr15_93619102_93620261	22.9223930757087	-3.82743570454173	4.59011079523499e-05	0.00856786060175289	Intron (ENST00000554318.2/107983974, intron 3 of 3)	LOC107983974
d35_low_control_vs_experiment	chr15_96036094_96037336	77.2976083584122	-2.2124462779548	0.00134591994223089	0.0407650889540898	Intron (ENST00000619812.1/112268156, intron 1 of 3)	LOC105370998
d35_low_control_vs_experiment	chr15_96087070_96087905	45.8592309977607	-2.89797270864603	0.000144331509472997	0.0141993679067594	Promoter (2-3kb)	LOC105369212
d35_low_control_vs_experiment	chr15_96166066_96167229	27.1655291009097	-1.82676573873309	0.000417327602508482	0.0228393833652845	Intron (ENST00000619812.1/112268156, intron 1 of 3)	LOC105370997
d35_low_control_vs_experiment	chr15_96171265_96172391	36.5095040428522	-2.64900862456511	0.000298100605334725	0.0195858633374663	Promoter (<=1kb)	LOC105370997
d35_low_control_vs_experiment	chr15_98718455_98719717	44.8579384481489	-2.69637643819752	1.20239220573466e-05	0.0050179705862271	Intron (ENST00000649865.1/3480, intron 2 of 20)	IGF1R
d35_low_control_vs_experiment	chr15_98799241_98799889	37.6091427255998	-2.58424587235796	5.93476554794093e-05	0.00968523105566996	Intron (ENST00000649865.1/3480, intron 2 of 20)	MIR4714
d35_low_control_vs_experiment	chr15_98822855_98823758	38.7025018964744	-2.09209697069517	0.00117452112931278	0.0381891181418236	Promoter (1-2kb)	IGF1R
d35_low_control_vs_experiment	chr15_98873330_98874305	38.8736793185095	-2.41808886982171	0.000179404798050461	0.0153059172911098	Promoter (<=1kb)	IGF1R
d35_low_control_vs_experiment	chr16_11497926_11498409	16.7024476117697	-2.21937851670824	0.000445448739640623	0.0235865029188012	Intron (ENST00000598234.6/400499, intron 10 of 65)	LOC400499
d35_low_control_vs_experiment	chr16_13014538_13015610	23.8525802037874	-2.41740368872039	0.000155040154382103	0.0144940368205782	Intron (ENST00000558583.3/729993, intron 2 of 4)	SHISA9
d35_low_control_vs_experiment	chr16_13112415_13113714	48.6676550950885	-3.48062095374089	1.65290965103083e-06	0.0020305245475454	Intron (ENST00000558583.3/729993, intron 2 of 4)	SHISA9
d35_low_control_vs_experiment	chr16_1333354_1334009	37.3146518612327	-1.76898388045632	0.0017762001440356	0.0465289986428989	Promoter (<=1kb)	BAIAP3
d35_low_control_vs_experiment	chr16_14097116_14098160	20.6124644401247	-3.51268120523203	5.68078772874126e-05	0.00953085284958738	Intron (ENST00000571589.6/57496, intron 2 of 16)	MRTFB
d35_low_control_vs_experiment	chr16_14194398_14195544	33.1461255255962	-3.49277985771468	7.81783191388779e-05	0.0109730679967804	Intron (ENST00000571589.6/57496, intron 3 of 16)	MRTFB
d35_low_control_vs_experiment	chr16_14300919_14301490	22.8040429614294	-1.8339212406073	0.00110013706994508	0.0369503219172749	Promoter (<=1kb)	MIR193BHG
d35_low_control_vs_experiment	chr16_14325696_14326942	78.022746291147	-2.48299089626931	0.00204526701062116	0.049581480950109	Exon (ENST00000634265.2/100129781, exon 2 of 2)	MIR193BHG
d35_low_control_vs_experiment	chr16_14364367_14365048	26.0526070093837	-2.71461711743701	0.000466614074777053	0.0241306592232232	Intron (ENST00000566054.1/105447648, intron 1 of 1)	LINC02130
d35_low_control_vs_experiment	chr16_17299482_17300327	24.828413775992	-2.92621753647608	0.000163650623056674	0.0147304302291803	Intron (ENST00000261381.7/64131, intron 2 of 11)	XYLT1
d35_low_control_vs_experiment	chr16_17433439_17434304	24.7199566001368	-3.93785462336656	6.29339890152552e-05	0.00988445655827738	Intron (ENST00000261381.7/64131, intron 1 of 11)	XYLT1
d35_low_control_vs_experiment	chr16_19393420_19394249	51.8136784610276	-3.28040988716839	9.00188916297988e-06	0.00437558193863686	Exon (ENST00000563613.1/105371114, exon 3 of 5)	LOC105371114
d35_low_control_vs_experiment	chr16_19746292_19747095	32.1473330337952	-3.19490693002856	0.000185964978746132	0.0155912913720091	Intron (ENST00000568126.5/124152, intron 4 of 5)	IQCK
d35_low_control_vs_experiment	chr16_19837188_19838495	57.196350757104	-2.56790726589361	0.000199747676374154	0.0161169776397548	Intron (ENST00000308214.13/124152, intron 7 of 7)	IQCK
d35_low_control_vs_experiment	chr16_20865912_20866692	21.5310897736828	-2.76260748529442	0.000433294950790188	0.0232666810543361	Promoter (2-3kb)	DCUN1D3
d35_low_control_vs_experiment	chr16_21277813_21278800	45.6042496737332	-1.56475174161219	0.000202692068320214	0.0162159048271613	Promoter (<=1kb)	CRYM
d35_low_control_vs_experiment	chr16_21611380_21612567	36.5147681404657	-2.40067979136607	0.00140237419829601	0.0415907491257154	Promoter (<=1kb)	METTL9
d35_low_control_vs_experiment	chr16_22314577_22315345	19.5825123832541	-3.26312184966287	0.000951363382502295	0.0343302106470898	Promoter (<=1kb)	POLR3E
d35_low_control_vs_experiment	chr16_22764616_22765694	31.2725829328766	-2.10566752932058	0.000524704433936939	0.0255578340795034	Distal Intergenic	LOC107984851
d35_low_control_vs_experiment	chr16_22781877_22782773	26.6970694954667	-3.09916685728533	0.000293901956864317	0.0194714903770949	Distal Intergenic	LOC107984851
d35_low_control_vs_experiment	chr16_24482538_24483356	25.7060178814982	-2.59236326403312	0.000917627399835028	0.033705189920609	Intron (ENST00000566929.1/105371143, intron 1 of 1)	LOC105371143
d35_low_control_vs_experiment	chr16_27236710_27237516	25.7669283124615	-2.10618239241207	0.000326610021771666	0.0203893901672864	Intron (ENST00000361439.9/197370, intron 2 of 7)	NSMCE1
d35_low_control_vs_experiment	chr16_27326778_27327622	40.9501090731659	-2.55381522409653	0.0013505176793951	0.0408237623476911	Intron (ENST00000566117.5/3566, intron 1 of 3)	IL4R
d35_low_control_vs_experiment	chr16_29131285_29131958	16.2834608360899	-1.75573206064894	0.00144825265716506	0.0422096010329139	Intron (ENST00000562902.2/107984832, intron 2 of 2)	SNX29P2
d35_low_control_vs_experiment	chr16_29605679_29606344	20.8373805534669	-2.75593630078425	0.00102145590065822	0.0357432338391947	Intron (ENST00000675579.1/440354, intron 1 of 13)	MIR3680-2
d35_low_control_vs_experiment	chr16_2981407_2982024	27.7359916171862	-2.84475994521321	0.000218556546339126	0.0168484681171432	Promoter (<=1kb)	PKMYT1
d35_low_control_vs_experiment	chr16_3099910_3100555	69.0405124575779	-1.37103925637091	0.00131349832491972	0.0403209384712184	Promoter (<=1kb)	ZSCAN10
d35_low_control_vs_experiment	chr16_31071843_31072291	19.5845454942923	-2.99578910141411	0.000501430291395865	0.0249346703784596	Promoter (<=1kb)	ZNF668
d35_low_control_vs_experiment	chr16_359918_361098	52.9980006502526	-3.56043031035746	4.74668586003779e-06	0.00323034453947536	Distal Intergenic	AXIN1
d35_low_control_vs_experiment	chr16_396345_396956	23.5150086634268	-2.24791432828895	0.000229283302426535	0.0173114075526213	Promoter (<=1kb)	NME4
d35_low_control_vs_experiment	chr16_46885930_46886606	39.0916901669454	-2.05522462112597	0.00139794897661402	0.0415227583302711	Promoter (1-2kb)	GPT2
d35_low_control_vs_experiment	chr16_50209887_50211006	59.0722963367871	-1.63582576582039	0.00111246501277142	0.0371707719592941	Intron (ENST00000436909.8/64282, intron 2 of 12)	TENT4B
d35_low_control_vs_experiment	chr16_50448491_50449153	20.2425134800469	-2.51773048768088	0.000827917996802851	0.0320269616236203	Intron (ENST00000637635.1/ENST00000637635.1, intron 2 of 4)	LINC02178
d35_low_control_vs_experiment	chr16_50550925_50551556	18.6539848286271	-2.79583861984939	0.00107914895348807	0.036610938035002	Promoter (2-3kb)	NKD1
d35_low_control_vs_experiment	chr16_50610381_50611325	48.8099653432711	-2.68879006585618	1.22425866053739e-05	0.0050179705862271	Intron (ENST00000564336.1/85407, intron 4 of 4)	NKD1
d35_low_control_vs_experiment	chr16_50645501_50646581	26.3580893949339	-2.44540257423615	0.00178380171291867	0.046594264551607	3' UTR	LOC101927272
d35_low_control_vs_experiment	chr16_53041128_53042134	65.7765690906148	-3.24868667814673	1.29225028016998e-05	0.0051120400885935	3' UTR	LOC105371267
d35_low_control_vs_experiment	chr16_53991075_53992180	22.0255391525194	-1.82100550171955	0.00185206419173728	0.0474977370542035	Exon (ENST00000624987.1/ENST00000624987.1, exon 1 of 1)	FTO
d35_low_control_vs_experiment	chr16_54350954_54351989	27.7424974753775	-3.94918450744514	3.65020859724248e-05	0.00786515419309398	Distal Intergenic	LINC02140
d35_low_control_vs_experiment	chr16_54430334_54431233	26.8273484414662	-2.9694966284198	2.12211611482665e-05	0.0063169723754716	Distal Intergenic	LINC02140
d35_low_control_vs_experiment	chr16_56814632_56815637	22.6094735817891	-2.0774404513583	0.00132376054430306	0.040467924986926	Intron (ENST00000563858.5/9688, intron 2 of 7)	NUP93
d35_low_control_vs_experiment	chr16_56861128_56862397	27.40879160071	-2.59253193300348	7.50147270972341e-07	0.00142538028319078	Promoter (2-3kb)	MIR138-2
d35_low_control_vs_experiment	chr16_57863367_57863999	22.146543853064	-2.20299660362023	0.000447766830989845	0.0236610791202641	Promoter (<=1kb)	KIFC3
d35_low_control_vs_experiment	chr16_66905198_66906263	43.416972518442	-2.7343977775821	0.000369863386736447	0.0216543808435146	Promoter (<=1kb)	LOC107984821
d35_low_control_vs_experiment	chr16_68267679_68268307	22.6953405895893	-2.83268624552099	0.000119880893550326	0.0130287031411333	Promoter (1-2kb)	SLC7A6
d35_low_control_vs_experiment	chr16_68298704_68300272	91.0477693398708	-3.42547001761713	3.66208099483666e-05	0.00787313726743438	3' UTR	SLC7A6OS
d35_low_control_vs_experiment	chr16_68327960_68329017	73.2331647999634	-2.7321934131251	2.11390056908268e-05	0.0063169723754716	Exon (ENST00000563443.1/54496, exon 2 of 2)	PRMT7
d35_low_control_vs_experiment	chr16_69563830_69564355	30.2437641250118	-1.75385251008753	0.00173390679778918	0.0459699245745109	Promoter (<=1kb)	NFAT5
d35_low_control_vs_experiment	chr16_69726200_69727238	146.214615576392	-1.26437677409439	0.000894064518612998	0.0332618927911482	Promoter (<=1kb)	NQO1
d35_low_control_vs_experiment	chr16_70453955_70455108	120.139947457747	-1.36847122882142	0.000771646061105907	0.0309481101915878	Promoter (<=1kb)	FCSK
d35_low_control_vs_experiment	chr16_70760210_70761574	57.0323990620349	-1.69297706948752	0.00124693585143481	0.0394480255441909	Promoter (<=1kb)	VAC14-AS1
d35_low_control_vs_experiment	chr16_71525941_71526911	44.10744955148	-1.89278243368642	0.000450329915411532	0.0237073737695873	Promoter (<=1kb)	CHST4
d35_low_control_vs_experiment	chr16_71637290_71638123	30.8076895301798	-4.31370148738096	6.57027527494596e-06	0.0038100164960356	3' UTR	MARVELD3
d35_low_control_vs_experiment	chr16_71933711_71934893	46.5372267574512	-2.66715569057543	1.84680793145088e-05	0.00594478377506109	Exon (ENST00000620267.2/342372, exon 27 of 30)	IST1
d35_low_control_vs_experiment	chr16_72379899_72380799	27.2486133236601	-3.07372081833865	0.000223796138449351	0.0170945907075197	Intron (ENST00000624829.4/101927957, intron 7 of 13)	LINC01572
d35_low_control_vs_experiment	chr16_72857824_72859108	49.860457708838	-1.82863791604976	0.00114287526760375	0.0377315486753548	Intron (ENST00000268489.10/463, intron 4 of 9)	ZFHX3
d35_low_control_vs_experiment	chr16_72931084_72931979	31.684573068261	-2.2200711662384	0.000200719862402299	0.0161440413673759	Intron (ENST00000268489.10/463, intron 3 of 9)	ZFHX3
d35_low_control_vs_experiment	chr16_72994722_72995884	29.8121897906195	-2.60089080285681	0.00129636319551038	0.0400979006924071	Intron (ENST00000268489.10/463, intron 1 of 9)	ZFHX3
d35_low_control_vs_experiment	chr16_73035921_73036941	88.8662766373715	-2.14304597573207	0.000136837193796949	0.0138892985533601	Intron (ENST00000268489.10/463, intron 1 of 9)	ZFHX3
d35_low_control_vs_experiment	chr16_7440815_7441514	23.6982190763108	-3.49756352691915	0.000279226834095137	0.0190542784049962	Intron (ENST00000641259.1/54715, intron 7 of 19)	RBFOX1
d35_low_control_vs_experiment	chr16_75044477_75045415	30.7287881970979	-3.20204521967986	0.00037040898923353	0.0216543808435146	Intron (ENST00000335325.9/84937, intron 1 of 4)	ZNRF1
d35_low_control_vs_experiment	chr16_751234_752322	38.3481602333939	-2.64657888914401	0.000626823488715986	0.0277138943944796	Distal Intergenic	MSLN
d35_low_control_vs_experiment	chr16_77843217_77843883	23.7432753216452	-3.30383588534453	0.000429513974913177	0.023159851615047	Intron (ENST00000302536.3/57687, intron 3 of 8)	VAT1L
d35_low_control_vs_experiment	chr16_81180882_81181771	60.2275362560724	-1.62283965022077	0.00129359551551914	0.0400477774705198	Promoter (<=1kb)	PKD1L2
d35_low_control_vs_experiment	chr16_81237878_81239245	71.0374505685209	-2.7452026159502	1.26591527149545e-05	0.00508820088736773	Promoter (<=1kb)	BCO1
d35_low_control_vs_experiment	chr16_81650861_81651599	39.8132360328602	-1.7769016006826	0.00109707193068825	0.0368860071529215	Promoter (<=1kb)	CMIP
d35_low_control_vs_experiment	chr16_82043205_82044785	89.6683252009397	-3.35051238989809	2.32071084379205e-05	0.00647237212603042	Exon (ENST00000561826.1/105371363, exon 3 of 3)	HSD17B2
d35_low_control_vs_experiment	chr16_83586293_83587578	26.4096819961537	-2.74966500145515	9.00776627555037e-05	0.0115536899775777	Intron (ENST00000268613.14/1012, intron 8 of 14)	CDH13
d35_low_control_vs_experiment	chr16_83674894_83675619	23.5543281243062	-3.2799525539157	0.000612877536364027	0.0273628796120946	Intron (ENST00000268613.14/1012, intron 10 of 14)	CDH13
d35_low_control_vs_experiment	chr16_83689168_83690038	22.1064760166436	-2.96100835106045	0.00060856351687364	0.0272918587929684	Intron (ENST00000268613.14/1012, intron 11 of 14)	LOC105371366
d35_low_control_vs_experiment	chr16_84013740_84014779	223.909724135591	-2.00846341536252	0.000177852885861182	0.015242722387162	Promoter (1-2kb)	SLC38A8
d35_low_control_vs_experiment	chr16_84532071_84532834	48.0725705995246	-2.78150942048965	5.87933461080898e-06	0.00356375393294298	Intron (ENST00000565079.5/57707, intron 1 of 3)	MEAK7
d35_low_control_vs_experiment	chr16_84826577_84827644	38.1506482251874	-1.92186654486506	0.00141613024129728	0.0417379888575525	Intron (ENST00000566151.1/83716, intron 1 of 2)	CRISPLD2
d35_low_control_vs_experiment	chr16_84847550_84848409	38.711941262374	-2.34102649210655	0.000520430012167252	0.0253822595849355	Promoter (<=1kb)	CRISPLD2
d35_low_control_vs_experiment	chr16_86432467_86433207	19.6538016229408	-3.17594958660756	0.000157748172716542	0.0145696795820646	Distal Intergenic	FENDRR
d35_low_control_vs_experiment	chr16_86759484_86760459	24.8913564579873	-3.31418091968272	4.2459050093887e-05	0.00844266759968725	Distal Intergenic	LOC107984819
d35_low_control_vs_experiment	chr16_86826919_86827715	19.0915262763847	-1.66976560373547	0.00201827071084283	0.0492140332271276	Distal Intergenic	LOC107984819
d35_low_control_vs_experiment	chr16_86844577_86845407	29.8384109637062	-3.76219328222367	2.86552401036057e-05	0.00695893866011012	Distal Intergenic	LOC107984819
d35_low_control_vs_experiment	chr16_87099020_87100131	34.3944477100819	-2.1760702477132	0.000598428429013464	0.0270390001777725	Intron (ENST00000562840.1/ENST00000562840.1, intron 4 of 4)	LINC02181
d35_low_control_vs_experiment	chr16_87821837_87823413	98.6955861740442	-1.93534538079624	0.000642558767921225	0.0281693341463278	Distal Intergenic	MIR6775
d35_low_control_vs_experiment	chr16_89345295_89346355	35.9033972332592	-3.09659027705413	3.72669694803313e-06	0.00289096525740721	Promoter (1-2kb)	ANKRD11
d35_low_control_vs_experiment	chr16_89686389_89687659	131.547984690718	-1.19014262636894	0.0017492160865294	0.0461398329895651	Promoter (<=1kb)	LINC02166
d35_low_control_vs_experiment	chr16_89711179_89712322	48.5200104168448	-1.41973014557282	0.00131337562677752	0.0403209384712184	Promoter (<=1kb)	VPS9D1-AS1
d35_low_control_vs_experiment	chr16_968558_969107	27.6475159979388	-3.33767426830415	0.000130665662141353	0.0136310309933372	Promoter (1-2kb)	LMF1
d35_low_control_vs_experiment	chr17_10127157_10128558	63.6617806604861	-2.44896346702678	0.000140684378850683	0.0140775296518464	Intron (ENST00000432992.7/8522, intron 1 of 13)	GAS7
d35_low_control_vs_experiment	chr17_10184054_10185103	48.6244384215104	-4.21557660962497	4.71624927855806e-07	0.00114350027870845	Intron (ENST00000432992.7/8522, intron 1 of 13)	GAS7
d35_low_control_vs_experiment	chr17_12549336_12550040	16.4545800088719	-3.15593476986322	0.00136005657126428	0.0409726714136994	Promoter (<=1kb)	LINC00670
d35_low_control_vs_experiment	chr17_14395973_14397107	34.0494879711562	-3.10716623901879	0.000233985380987831	0.0174646734841091	Exon (ENST00000436469.1/107985080, exon 4 of 5)	LOC107985080
d35_low_control_vs_experiment	chr17_14974499_14975390	20.0859292883706	-3.29689232300447	0.000289346497860687	0.0193573708459759	Distal Intergenic	CDRT7
d35_low_control_vs_experiment	chr17_16297260_16298080	18.2567833526567	-2.4589971658818	0.000991216544768676	0.0351450939620985	Intron (ENST00000607144.4/9487, intron 2 of 2)	PIGL
d35_low_control_vs_experiment	chr17_16508748_16509806	25.5410223041291	-3.30086871342251	0.000659018647023257	0.028604347219967	Distal Intergenic	LRRC75A
d35_low_control_vs_experiment	chr17_17766855_17767838	41.9814801569531	-1.72435250454437	0.000458377299452219	0.0239006477766753	Promoter (2-3kb)	RAI1-AS1
d35_low_control_vs_experiment	chr17_17809537_17810855	79.4856803647949	-1.21605527257862	0.000554511369592334	0.0261735813281856	Promoter (<=1kb)	RAI1
d35_low_control_vs_experiment	chr17_18153321_18154323	89.3044532665064	-1.82481968623471	0.000151654319928642	0.0143941392060812	Promoter (<=1kb)	MYO15A
d35_low_control_vs_experiment	chr17_1820273_1821313	23.1197762871196	-2.78826773155889	0.000703182171042045	0.0295763457923602	Intron (ENST00000305513.12/114826, intron 2 of 10)	SMYD4
d35_low_control_vs_experiment	chr17_18966998_18968051	31.0449863676233	-1.50645635961836	0.00194915952003319	0.048594897077233	Intron (ENST00000317977.10/125206, intron 5 of 14)	FAM83G
d35_low_control_vs_experiment	chr17_19457748_19459399	37.1066999095047	-2.72596379249025	0.000143231806872136	0.0141473435470733	Promoter (1-2kb)	LOC105371574
d35_low_control_vs_experiment	chr17_19578213_19579099	43.228865911664	-3.90068112152039	2.49431193833672e-05	0.00662575175793753	3' UTR	SLC47A1
d35_low_control_vs_experiment	chr17_19671897_19672715	22.4608363031729	-3.63188952281527	8.70621375014193e-05	0.0113924269912259	Promoter (<=1kb)	ALDH3A2
d35_low_control_vs_experiment	chr17_2023359_2024632	66.8491192068435	-1.21541008139928	0.00133923048452755	0.0406801484498964	Promoter (<=1kb)	LOC105371486
d35_low_control_vs_experiment	chr17_2551423_2552580	45.4577760034312	-2.80465939107074	3.56054826952934e-05	0.00783659470888723	Distal Intergenic	METTL16
d35_low_control_vs_experiment	chr17_27888942_27889435	16.2301905452865	-3.17338535704192	0.000881702978840022	0.033044093878961	Promoter (2-3kb)	LYRM9
d35_low_control_vs_experiment	chr17_28370176_28370926	37.9457175339363	-2.63360386072508	0.00207366354276741	0.0499614119485346	Promoter (<=1kb)	VTN
d35_low_control_vs_experiment	chr17_28549190_28549937	31.5246312673791	-3.70588092421353	0.000177719312807123	0.0152399633187284	Promoter (<=1kb)	UNC119
d35_low_control_vs_experiment	chr17_2872219_2872833	23.8447145809215	-2.13571668718753	0.00101141421104963	0.0355550167545895	Intron (ENST00000637138.1/23108, intron 3 of 25)	RAP1GAP2
d35_low_control_vs_experiment	chr17_28808545_28809337	57.8191327182195	-2.78430936057957	0.000193423611591762	0.0158891949611499	Promoter (2-3kb)	FAM222B
d35_low_control_vs_experiment	chr17_29376192_29377440	56.9360653420724	-1.33596532993041	0.00182291090903435	0.0471650744235092	Intron (ENST00000584958.2/ENST00000584958.2, intron 1 of 1)	TAOK1
d35_low_control_vs_experiment	chr17_29622342_29623407	74.5747530170009	-1.24563901444849	0.000507984389836512	0.0250754797034052	Promoter (<=1kb)	CORO6
d35_low_control_vs_experiment	chr17_31487486_31488973	169.871925643968	-1.53004917379913	0.000892187876999676	0.0332491618084453	Promoter (<=1kb)	RAB11FIP4
d35_low_control_vs_experiment	chr17_31557062_31557946	43.0941035978139	-4.83663449347188	5.79080557397164e-07	0.0012762460611567	Promoter (2-3kb)	MIR193A
d35_low_control_vs_experiment	chr17_35432302_35433999	91.3286326941847	-1.7268977231946	0.00205413677012481	0.0497003235102224	Promoter (<=1kb)	SLFN12
d35_low_control_vs_experiment	chr17_39699722_39701043	92.3459784366312	-1.57129828425654	0.00044703555627331	0.0236610791202641	Promoter (<=1kb)	ERBB2
[truncated: 5,088 more rows]
