# Supplementary material for: Epigenetic insights into GABAergic development in Dravet Syndrome iPSC and therapeutic implications
Source: eLife. 2024 Aug 27;12:RP92599. doi: 10.7554/eLife.92599 (PMC11349296; doi:10.7554/eLife.92599)
Supplement: Supplementary file 7. — Source data for Figure 5 and Figure 5—figure supplement 1 [file elife-92599-supp7.xlsx]

## Sheet: Supplementary File 7
Group	Peak names	BaseMean	log2FoldChange	p Value	FDR	Annoation	Genes
control_d65_vs_control_VPA_high_1B	chr1_1554773_1555498	25.6000927651033	1.54161051904365	0.00537420616359763	0.0298137279982338	Intron (ENST00000291386.4/29101, intron 2 of 4)	SSU72
control_d65_vs_control_VPA_high_1B	chr1_2431256_2432959	34.919929682704	1.14158897912617	0.00607748117147692	0.0327376323833123	Intron (ENST00000609981.5/9651, intron 2 of 3)	PLCH2
control_d65_vs_control_VPA_high_1B	chr1_3125509_3126367	23.5296968079442	1.8104737270728	0.00111492858331014	0.00865552431531047	Promoter (1-2kb)	MIR4251
control_d65_vs_control_VPA_high_1B	chr1_3248786_3250235	72.3222416252582	1.26279335626256	0.000425719284841614	0.00395300216952115	Intron (ENST00000511072.5/63976, intron 3 of 15)	PRDM16
control_d65_vs_control_VPA_high_1B	chr1_5896662_5897678	41.3357896846027	4.77967515924395	2.80113616669592e-11	1.60781828472837e-09	Intron (ENST00000478423.6/261734, intron 12 of 25)	NPHP4
control_d65_vs_control_VPA_high_1B	chr1_6033938_6034902	34.3539501469765	1.62177432760326	0.000217322573296643	0.00226474910849457	Promoter (<=1kb)	KCNAB2
control_d65_vs_control_VPA_high_1B	chr1_6240096_6240767	44.4624318932213	1.79359262030391	0.00323999062731989	0.0201428090314583	Promoter (2-3kb)	LINC00337
control_d65_vs_control_VPA_high_1B	chr1_8706875_8707401	25.8813525412881	2.33390816880484	0.000627870983070792	0.00543197504518836	Intron (ENST00000337907.7/473, intron 2 of 23)	RERE
control_d65_vs_control_VPA_high_1B	chr1_9922220_9923337	50.5692225354957	1.81929285827964	0.00544744315966624	0.0301169260922103	3' UTR	LZIC
control_d65_vs_control_VPA_high_1B	chr1_10178855_10180244	66.2225739482262	2.15991781437419	2.33666461074553e-05	0.000339705909782438	Promoter (<=1kb)	UBE4B
control_d65_vs_control_VPA_high_1B	chr1_10733958_10735928	73.3587022511885	1.78946457674421	5.75061215838522e-07	1.31659760115477e-05	Intron (ENST00000377022.8/54897, intron 2 of 20)	CASZ1
control_d65_vs_control_VPA_high_1B	chr1_11354955_11356616	77.8819488780437	1.66172098127544	4.98479053491366e-07	1.15896670628983e-05	Distal Intergenic	UBIAD1
control_d65_vs_control_VPA_high_1B	chr1_11413426_11414538	34.4966668593623	1.62993985404123	0.00135982101160545	0.0101575628350695	Distal Intergenic	DISP3
control_d65_vs_control_VPA_high_1B	chr1_11499042_11500463	75.5127857750132	2.56397763370945	1.72681429196239e-09	6.93308750580985e-08	Intron (ENST00000294484.7/57540, intron 1 of 20)	DISP3
control_d65_vs_control_VPA_high_1B	chr1_12336140_12336994	23.6990300975161	1.57151426429342	0.00111855617836674	0.00867692816299695	Exon (ENST00000487188.1/55187, exon 12 of 12)	VPS13D
control_d65_vs_control_VPA_high_1B	chr1_13585358_13586423	37.8765982895235	1.9933924590717	5.99797087944816e-05	0.00076351947824679	Promoter (<=1kb)	PDPN
control_d65_vs_control_VPA_high_1B	chr1_14404677_14405510	23.9797633501218	2.47911198538417	3.77996134950452e-05	0.000513962332159013	Intron (ENST00000636203.1/23254, intron 2 of 16)	KAZN-AS1
control_d65_vs_control_VPA_high_1B	chr1_14625578_14626455	25.4335607871637	1.54520780786445	0.000973633288846792	0.00776142286553575	Intron (ENST00000636203.1/23254, intron 3 of 16)	KAZN
control_d65_vs_control_VPA_high_1B	chr1_14980599_14981354	32.3761548040956	1.7068238909413	0.000254745404362118	0.00258363840772627	Intron (ENST00000636203.1/23254, intron 4 of 16)	KAZN
control_d65_vs_control_VPA_high_1B	chr1_15042677_15043614	53.9151583062339	2.14347640622073	0.00043095018321706	0.00399312983283387	Intron (ENST00000636203.1/23254, intron 5 of 16)	KAZN
control_d65_vs_control_VPA_high_1B	chr1_15384121_15385087	36.2733619065026	2.1512415338105	2.41569439089879e-06	4.69355764179445e-05	Promoter (<=1kb)	FHAD1
control_d65_vs_control_VPA_high_1B	chr1_17671084_17672142	38.7186750690973	1.21117319435102	0.00628641010479619	0.033602475163584	Intron (ENST00000361221.8/55160, intron 26 of 28)	ARHGEF10L
control_d65_vs_control_VPA_high_1B	chr1_18557474_18558513	47.5859223923441	1.47641234165387	0.000321278664614596	0.00313389488100559	Distal Intergenic	PAX7
control_d65_vs_control_VPA_high_1B	chr1_20108071_20109007	26.7835336127896	1.78680742962639	0.00235480936784954	0.0156828224239325	Downstream (2-3kb)	PLA2G2D
control_d65_vs_control_VPA_high_1B	chr1_20219717_20220845	22.62986389507	1.79135368568451	0.00178869896113125	0.0126393953814353	Distal Intergenic	LINC01757
control_d65_vs_control_VPA_high_1B	chr1_20290339_20291414	50.7826809971539	1.32446376453891	0.00188362399717381	0.0131424489636558	Promoter (<=1kb)	VWA5B1
control_d65_vs_control_VPA_high_1B	chr1_20342958_20344333	43.031147363504	1.43755009653732	0.0077048404309783	0.0393011724509045	3' UTR	VWA5B1
control_d65_vs_control_VPA_high_1B	chr1_20710422_20712325	48.6270296820224	1.4456396259731	0.00014693687875683	0.00163419320646391	Intron (ENST00000375044.5/57576, intron 3 of 14)	KIF17
control_d65_vs_control_VPA_high_1B	chr1_22121287_22122012	27.571130747409	1.94443782601057	6.41510159228265e-05	0.000808155233831634	Exon (ENST00000290167.11/54361, exon 3 of 5)	WNT4
control_d65_vs_control_VPA_high_1B	chr1_22673185_22674317	52.8931091851068	1.08025694585743	0.00362735170433935	0.0219927021154303	Distal Intergenic	C1QB
control_d65_vs_control_VPA_high_1B	chr1_22782271_22783044	34.6971960869211	3.23036779713862	0.000479482524394339	0.00436471634813982	Intron (ENST00000544305.5/2048, intron 2 of 6)	EPHB2
control_d65_vs_control_VPA_high_1B	chr1_22806487_22807173	26.9944762317039	1.52075658580203	0.00937665737253011	0.0455846638357368	Intron (ENST00000544305.5/2048, intron 3 of 6)	EPHB2
control_d65_vs_control_VPA_high_1B	chr1_23356337_23357189	27.4172148196384	2.36438804286645	2.98937233314694e-05	0.000419130269463715	Downstream (2-3kb)	ZNF436
control_d65_vs_control_VPA_high_1B	chr1_26429525_26430382	20.1451990991315	1.67425808737619	0.00537390848645205	0.0298137279982338	Promoter (1-2kb)	DHDDS
control_d65_vs_control_VPA_high_1B	chr1_27306780_27308491	47.9308119802001	1.34344134262541	0.000699088088566347	0.00593646716809614	Promoter (1-2kb)	WDTC1
control_d65_vs_control_VPA_high_1B	chr1_30856070_30856753	24.72389467857	1.67938162406232	0.000297390595541649	0.00294007268690962	Distal Intergenic	SDC3
control_d65_vs_control_VPA_high_1B	chr1_31227775_31228530	28.0406922549764	2.87821983769675	5.67795531279834e-08	1.65093010470405e-06	Intron (ENST00000373736.7/79570, intron 1 of 6)	NKAIN1
control_d65_vs_control_VPA_high_1B	chr1_36365988_36366792	27.6455530616297	1.55904101798882	0.000638307276762535	0.00550553835209001	Promoter (<=1kb)	STK40
control_d65_vs_control_VPA_high_1B	chr1_37234638_37235636	36.5103635592036	1.91025359308882	0.000119283278534492	0.00136831881935418	Intron (ENST00000657513.1/ENST00000657513.1, intron 2 of 3)	MIR4255
control_d65_vs_control_VPA_high_1B	chr1_37255238_37256145	23.2663238925827	1.91197656552541	0.00189774999089668	0.0132137223082532	Intron (ENST00000657513.1/ENST00000657513.1, intron 2 of 3)	MIR4255
control_d65_vs_control_VPA_high_1B	chr1_37391165_37392414	30.6093264916014	1.4789407815933	0.00281066188758929	0.0180231998728175	Intron (ENST00000668045.1/728431, intron 1 of 1)	LINC01137
control_d65_vs_control_VPA_high_1B	chr1_37764283_37766461	50.6521616517834	2.54615886794499	1.16259598712207e-11	7.14202957315368e-10	Promoter (<=1kb)	EPHA10
control_d65_vs_control_VPA_high_1B	chr1_38244083_38244962	22.7736592521385	2.15019498208327	0.000854031370947011	0.00698079947813691	Distal Intergenic	LINC01343
control_d65_vs_control_VPA_high_1B	chr1_38418154_38419083	20.5550064953703	1.46367961662547	0.00770418429035614	0.0392998367805045	Distal Intergenic	LINC01685
control_d65_vs_control_VPA_high_1B	chr1_38498067_38499136	23.1325870349704	2.48053091934309	5.03733530601299e-05	0.000657138043264489	Intron (ENST00000658851.1/105378656, intron 2 of 2)	LINC01685
control_d65_vs_control_VPA_high_1B	chr1_39700879_39702343	51.0509044126329	1.28181790695368	0.000610758487384703	0.00531274867679849	Intron (ENST00000470018.5/10450, intron 1 of 7)	PPIE
control_d65_vs_control_VPA_high_1B	chr1_39886658_39887409	29.1591975121545	3.836769975337	6.76727439932705e-10	2.97449795247208e-08	Distal Intergenic	TRIT1
control_d65_vs_control_VPA_high_1B	chr1_39898101_39899382	89.4669583190114	1.63631750965643	4.5852606211478e-06	8.22804360233441e-05	Promoter (2-3kb)	MYCL
control_d65_vs_control_VPA_high_1B	chr1_41404088_41405021	34.1384685248238	1.70540457934597	3.92522557945849e-05	0.000531177800802886	Distal Intergenic	FOXO6-AS1
control_d65_vs_control_VPA_high_1B	chr1_41919799_41920464	23.7736217894925	3.67153537408479	2.41424354395351e-09	9.43296341656129e-08	Promoter (<=1kb)	HIVEP3
control_d65_vs_control_VPA_high_1B	chr1_43008025_43009299	112.041490660611	2.85562365786362	3.38909982164223e-07	8.20305358238334e-06	Distal Intergenic	SLC2A1-AS1
control_d65_vs_control_VPA_high_1B	chr1_43952732_43953446	30.1086795441184	2.33209604020242	6.3814585074551e-06	0.000109750515712807	Promoter (<=1kb)	IPO13
control_d65_vs_control_VPA_high_1B	chr1_44505229_44505982	28.5058253218655	1.66716192389518	0.00708043700805448	0.036806529566278	Intron (ENST00000355387.6/55182, intron 2 of 14)	MIR5584
control_d65_vs_control_VPA_high_1B	chr1_44802153_44802878	45.3697098267929	1.98457234200437	0.000118673948703697	0.00136250515338866	Promoter (<=1kb)	PLK3
control_d65_vs_control_VPA_high_1B	chr1_45518863_45519643	22.5078875186258	2.05164816917071	0.00111057077441257	0.0086267327123114	Promoter (2-3kb)	PRDX1
control_d65_vs_control_VPA_high_1B	chr1_46549583_46550214	20.2208130501684	1.40702537954939	0.0065393041870949	0.0346458335321485	Promoter (<=1kb)	KNCN
control_d65_vs_control_VPA_high_1B	chr1_46558045_46559062	21.6955556924458	2.47566739569006	0.000456445203890934	0.00419079428955611	3' UTR	MKNK1
control_d65_vs_control_VPA_high_1B	chr1_47208161_47209488	29.1866676675458	1.69783221804714	0.00300240351260207	0.0189945138249182	Distal Intergenic	TAL1
control_d65_vs_control_VPA_high_1B	chr1_48024676_48025565	26.0104487922483	2.15055801803479	9.65903141718263e-05	0.00114401359211555	Distal Intergenic	TRABD2B
control_d65_vs_control_VPA_high_1B	chr1_48654496_48655432	20.2925702463981	2.26600456909398	0.00145237511618954	0.0106993780455255	Intron (ENST00000371839.6/84871, intron 7 of 13)	AGBL4
control_d65_vs_control_VPA_high_1B	chr1_50110541_50111287	31.5528615365536	2.89472332083113	5.92681032202256e-06	0.000103078514260505	Promoter (<=1kb)	ELAVL4
control_d65_vs_control_VPA_high_1B	chr1_50251532_50252344	43.3518277479449	3.44931777765353	6.76391493941259e-09	2.42031841233556e-07	Intron (ENST00000641749.1/ENST00000641749.1, intron 9 of 11)	ELAVL4
control_d65_vs_control_VPA_high_1B	chr1_50699720_50700689	56.8221860983992	2.04827281901427	5.17327035652208e-06	9.1497715596775e-05	Intron (ENST00000396153.7/11124, intron 7 of 18)	FAF1
control_d65_vs_control_VPA_high_1B	chr1_52659924_52660742	40.656203165434	1.40672559976911	0.000649533815258258	0.00558419703344752	Intron (ENST00000440303.5/348378, intron 3 of 4)	SHISAL2A
control_d65_vs_control_VPA_high_1B	chr1_53288010_53289332	54.487393749562	1.4650341096387	0.000108284547151027	0.00126071961028642	Exon (ENST00000421637.1/ENST00000421637.1, exon 1 of 2)	LRP8
control_d65_vs_control_VPA_high_1B	chr1_53502661_53504297	63.7267576932915	1.53909382083172	2.8003164916223e-05	0.000396330771273652	Downstream (1-2kb)	DMRTB1
control_d65_vs_control_VPA_high_1B	chr1_56435676_56436661	63.0838940179758	1.24290436516681	0.00094498056439217	0.00757755814920843	Intron (ENST00000641494.1/8613, intron 3 of 5)	LINC01767
control_d65_vs_control_VPA_high_1B	chr1_56436749_56437565	74.0933784406319	3.54169507006089	1.40502648913667e-10	7.07825146584378e-09	Intron (ENST00000641494.1/8613, intron 3 of 5)	LINC01767
control_d65_vs_control_VPA_high_1B	chr1_56477161_56478121	53.07841501944	1.32387157052196	0.00454300023230635	0.0262250289378085	Exon (ENST00000641035.1/ENST00000641035.1, exon 1 of 2)	PLPP3
control_d65_vs_control_VPA_high_1B	chr1_56510000_56511359	39.3083965253349	1.42400527395113	0.00144631773411763	0.0106646114464096	Promoter (<=1kb)	PLPP3
control_d65_vs_control_VPA_high_1B	chr1_59077874_59078713	25.4601784606779	2.57279054765642	0.000148663283855288	0.00164971225692586	Exon (ENST00000451090.1/ENST00000451090.1, exon 1 of 3)	LINC01358
control_d65_vs_control_VPA_high_1B	chr1_60621139_60622139	24.1225735500837	1.4152336140944	0.00784675090416979	0.0398598069908679	Promoter (<=1kb)	LINC01748
control_d65_vs_control_VPA_high_1B	chr1_61042429_61044162	33.2086811132726	1.41266593785616	0.00188196341767375	0.0131340390555403	Intron (ENST00000371191.5/4774, intron 1 of 10)	NFIA
control_d65_vs_control_VPA_high_1B	chr1_61951513_61952631	35.2945367746812	1.54200818963606	0.000346908573801595	0.00333775819766603	Promoter (<=1kb)	PATJ
control_d65_vs_control_VPA_high_1B	chr1_62181032_62183154	47.9201840550828	2.1328125888635	3.91708029611638e-07	9.34259737628161e-06	Distal Intergenic	L1TD1
control_d65_vs_control_VPA_high_1B	chr1_63199517_63200425	36.469740498942	3.84955863551934	3.29193798538525e-09	1.25691375145491e-07	Intron (ENST00000666431.1/199899, intron 2 of 10)	LINC00466
control_d65_vs_control_VPA_high_1B	chr1_63623718_63624626	28.9344712491739	3.03218928511083	2.50772818458166e-08	7.95141693468451e-07	Promoter (<=1kb)	PGM1
control_d65_vs_control_VPA_high_1B	chr1_64631301_64632180	33.1818787789269	1.34459691923501	0.00346889303376906	0.0212589138806482	Intron (ENST00000651257.2/57685, intron 5 of 26)	CACHD1
control_d65_vs_control_VPA_high_1B	chr1_64663588_64664994	61.8310231751118	1.7603321542598	5.40999164355962e-07	1.24735160094499e-05	Promoter (<=1kb)	CACHD1
control_d65_vs_control_VPA_high_1B	chr1_65167450_65168293	25.1338582885047	2.75124748546914	4.02238099770998e-05	0.000542373892295383	Promoter (1-2kb)	AK4
control_d65_vs_control_VPA_high_1B	chr1_65265321_65266455	40.6973897874168	1.05843995601682	0.00814481614587356	0.0409853974357014	Promoter (<=1kb)	DNAJC6
control_d65_vs_control_VPA_high_1B	chr1_66090753_66091663	64.9046373824924	2.65145720959568	2.31673255150153e-10	1.11580422133758e-08	Intron (ENST00000329654.8/5142, intron 3 of 16)	LOC101927139
control_d65_vs_control_VPA_high_1B	chr1_66168879_66169800	43.562462105133	1.81660033090318	4.46610485637489e-06	8.04391162539672e-05	Intron (ENST00000329654.8/5142, intron 3 of 16)	PDE4B
control_d65_vs_control_VPA_high_1B	chr1_66353125_66353826	36.9023923992785	2.6313908332177	3.30396585592601e-07	8.01938850012695e-06	Promoter (<=1kb)	PDE4B
control_d65_vs_control_VPA_high_1B	chr1_67853596_67854285	33.1679767641766	1.49634443193655	0.000601697038687377	0.00524720669645102	Intron (ENST00000420587.5/100289178, intron 1 of 9)	GNG12
control_d65_vs_control_VPA_high_1B	chr1_68216923_68218123	55.7998504730659	1.60838299725393	3.09914938903296e-06	5.82998050491803e-05	Intron (ENST00000354777.6/79971, intron 1 of 11)	WLS
control_d65_vs_control_VPA_high_1B	chr1_68313656_68314598	23.0548375532443	1.36470389308595	0.00809326587981718	0.0407877684256867	Distal Intergenic	WLS
control_d65_vs_control_VPA_high_1B	chr1_68975333_68976047	29.6013008199548	1.96348445666515	2.43178537841098e-05	0.000351585935628601	Intron (ENST00000644104.1/ENST00000644104.1, intron 1 of 3)	LINC01707
control_d65_vs_control_VPA_high_1B	chr1_69566938_69568828	99.7365583471121	1.74059496012745	1.31583140846592e-10	6.67784439796457e-09	Promoter (<=1kb)	LRRC7
control_d65_vs_control_VPA_high_1B	chr1_70674762_70676319	21.6043901811351	2.36802270104984	9.20678273823121e-05	0.00109828941000241	Distal Intergenic	LINC01788
control_d65_vs_control_VPA_high_1B	chr1_73673422_73674730	43.7225261372629	1.93226985830433	5.00001856883546e-07	1.1619651452822e-05	Intron (ENST00000424953.1/109729166, intron 1 of 2)	LINC02238
control_d65_vs_control_VPA_high_1B	chr1_73979504_73980968	25.762607655899	3.84697387177263	3.89397138893394e-06	7.13217189245573e-05	Distal Intergenic	LRRIQ3
control_d65_vs_control_VPA_high_1B	chr1_74357369_74358439	31.8334902800769	1.93807448641101	1.24262795044174e-05	0.000196435963937728	Intron (ENST00000557284.6/100526835, intron 13 of 26)	FPGT-TNNI3K
control_d65_vs_control_VPA_high_1B	chr1_74422465_74423291	38.6402670619899	3.3234325137958	1.89717947264102e-10	9.30549448165555e-09	Intron (ENST00000557284.6/100526835, intron 19 of 26)	FPGT-TNNI3K
control_d65_vs_control_VPA_high_1B	chr1_74429635_74431042	45.2000547695578	3.35857488796272	4.8845741101701e-12	3.19776785079136e-10	Intron (ENST00000557284.6/100526835, intron 19 of 26)	FPGT-TNNI3K
control_d65_vs_control_VPA_high_1B	chr1_74504688_74505619	43.9758273725484	3.86928799536725	1.45782680346687e-14	1.48271398961177e-12	Intron (ENST00000557284.6/100526835, intron 25 of 26)	LRRC53
control_d65_vs_control_VPA_high_1B	chr1_74506024_74506944	48.7847780824951	2.94620628594546	1.64894600389346e-13	1.41807933603169e-11	Intron (ENST00000557284.6/100526835, intron 25 of 26)	LRRC53
control_d65_vs_control_VPA_high_1B	chr1_74540538_74541426	24.8103811093339	2.09097817982305	0.000173543962491685	0.00187549033648853	Promoter (<=1kb)	FPGT-TNNI3K
control_d65_vs_control_VPA_high_1B	chr1_75074690_75075601	26.6296600890705	4.33427231481614	1.24497261442879e-07	3.3411344476539e-06	Distal Intergenic	LHX8
control_d65_vs_control_VPA_high_1B	chr1_75130847_75131879	31.3663423910444	1.88372263288121	0.00190741617863141	0.0132672800777421	Promoter (2-3kb)	LHX8
control_d65_vs_control_VPA_high_1B	chr1_76293630_76294927	24.563510575636	2.83121754537423	5.53728003381192e-07	1.27345942042025e-05	Intron (ENST00000328299.4/256435, intron 1 of 4)	ST6GALNAC3
control_d65_vs_control_VPA_high_1B	chr1_76764533_76765660	24.437336381778	1.42081980166914	0.00423934508471176	0.0248613287063606	Intron (ENST00000427806.1/110806286, intron 1 of 2)	LINC02567
control_d65_vs_control_VPA_high_1B	chr1_77015748_77017682	93.9250137916623	2.35678873763044	5.16793196668101e-10	2.3260477891849e-08	Intron (ENST00000318803.6/81849, intron 2 of 4)	ST6GALNAC5
control_d65_vs_control_VPA_high_1B	chr1_77489730_77490607	20.8183660017335	2.26434641700137	0.000872178126657282	0.00710030713589344	Intron (ENST00000354567.7/26289, intron 10 of 13)	AK5
control_d65_vs_control_VPA_high_1B	chr1_77983878_77984534	26.9133634849097	2.89435588441722	9.5501612429931e-05	0.00113334113772217	Intron (ENST00000487931.1/11080, intron 1 of 2)	DNAJB4
control_d65_vs_control_VPA_high_1B	chr1_80532873_80534383	34.8301427055103	1.93140536960524	0.000247213917097632	0.00251990705973665	Promoter (1-2kb)	LINC01781
control_d65_vs_control_VPA_high_1B	chr1_81305876_81306683	35.1711622106526	1.80874817238735	2.29443731526933e-05	0.000334322711095446	Promoter (<=1kb)	ADGRL2
control_d65_vs_control_VPA_high_1B	chr1_81381803_81383280	25.4220939146076	2.25994295800164	0.00017804116825001	0.00191661058029844	Intron (ENST00000473719.5/23266, intron 1 of 4)	ADGRL2
control_d65_vs_control_VPA_high_1B	chr1_81464119_81465134	43.7941158968317	3.44371602534474	2.47789251550941e-09	9.66082459215213e-08	Intron (ENST00000473719.5/23266, intron 2 of 4)	LOC101927434
control_d65_vs_control_VPA_high_1B	chr1_81467016_81467907	37.6574051783567	1.76076715313114	0.000138754807554056	0.00155578018261268	Intron (ENST00000473719.5/23266, intron 2 of 4)	LOC101927434
control_d65_vs_control_VPA_high_1B	chr1_81477746_81478904	20.0863120926598	2.28675421437489	8.27191495952886e-06	0.00013764383635411	Intron (ENST00000473719.5/23266, intron 2 of 4)	LOC101927434
control_d65_vs_control_VPA_high_1B	chr1_81577072_81577707	23.4679768864984	2.64323215946333	7.83711420952903e-05	0.000958111964438105	Intron (ENST00000473719.5/23266, intron 2 of 4)	LOC101927434
control_d65_vs_control_VPA_high_1B	chr1_81804189_81804781	32.3538945032297	4.39140769412393	1.89720233522705e-06	3.8040605181872e-05	Intron (ENST00000370721.5/23266, intron 4 of 24)	ADGRL2
control_d65_vs_control_VPA_high_1B	chr1_81920014_81921224	56.9465089927102	1.51464706375943	7.94571707092511e-05	0.000969664472127723	Intron (ENST00000370721.5/23266, intron 6 of 24)	ADGRL2
control_d65_vs_control_VPA_high_1B	chr1_83692018_83694928	103.027741786833	1.10837153671926	7.22696325744196e-05	0.000894823737588836	Intron (ENST00000417975.1/101927587, intron 2 of 2)	LINC01725
control_d65_vs_control_VPA_high_1B	chr1_83741179_83742119	43.5631155270567	1.93770819373694	0.00087196708212707	0.00709916887701462	Intron (ENST00000417975.1/101927587, intron 2 of 2)	LINC01725
control_d65_vs_control_VPA_high_1B	chr1_83777028_83778359	21.5275579923616	2.32625744862069	0.000149769654487366	0.00165967337145378	Intron (ENST00000417975.1/101927587, intron 1 of 2)	LINC01725
control_d65_vs_control_VPA_high_1B	chr1_84715472_84716309	27.1433572808344	2.32162914618205	9.78712363273053e-06	0.000159553806647882	Distal Intergenic	SSX2IP
control_d65_vs_control_VPA_high_1B	chr1_84719925_84721069	38.3937444308491	1.49858044685087	0.000410904690609059	0.00383863830141966	Distal Intergenic	SSX2IP
control_d65_vs_control_VPA_high_1B	chr1_85307839_85309564	65.647753396798	1.95840115715806	3.76273541892301e-08	1.14116271842481e-06	Intron (ENST00000654182.1/646626, intron 2 of 2)	LOC646626
control_d65_vs_control_VPA_high_1B	chr1_86195029_86195966	44.02842820699	3.55445940745349	6.64347632206583e-12	4.2583615141432e-10	Distal Intergenic	COL24A1
control_d65_vs_control_VPA_high_1B	chr1_87154361_87155576	30.6924378608536	1.67544170041052	1.49810212968019e-05	0.000231072440487497	Intron (ENST00000370548.3/339524, intron 7 of 7)	LINC01140
control_d65_vs_control_VPA_high_1B	chr1_87167416_87168974	36.5383163891614	1.11009434546761	0.00853987777536181	0.0424737525263161	3' UTR	LINC01140
control_d65_vs_control_VPA_high_1B	chr1_87311282_87312238	24.0891441640718	2.80318420111709	8.03825982303688e-08	2.2581664919435e-06	Distal Intergenic	LMO4
control_d65_vs_control_VPA_high_1B	chr1_89575637_89576516	29.2403153923008	3.582983278893	5.23266624734582e-08	1.53421251028592e-06	Intron (ENST00000449440.5/23507, intron 4 of 5)	LRRC8B
control_d65_vs_control_VPA_high_1B	chr1_89719524_89720404	23.4463989228033	1.5787634914365	0.00215505893425524	0.0146187898835555	3' UTR	LRRC8C
control_d65_vs_control_VPA_high_1B	chr1_89801759_89802714	23.996436141844	3.18891231767043	0.000225858041127233	0.00233671875994132	Intron (ENST00000370453.5/55144, intron 2 of 3)	LRRC8D
control_d65_vs_control_VPA_high_1B	chr1_90621748_90623974	30.7428129785106	1.22076409605785	0.00650305847342875	0.0344913847131603	Distal Intergenic	SNORD3G
control_d65_vs_control_VPA_high_1B	chr1_91564686_91565842	90.4890672694833	1.54768012190054	1.3232478866341e-05	0.000207441474577475	Distal Intergenic	CDC7
control_d65_vs_control_VPA_high_1B	chr1_92029260_92030981	62.8005615814788	1.53888766106859	7.03273672567575e-05	0.000873651109438872	Promoter (<=1kb)	EPHX4
control_d65_vs_control_VPA_high_1B	chr1_93078582_93080250	133.103247884811	1.05415172150258	9.23957544235959e-06	0.000151532077838965	Promoter (<=1kb)	MTF2
control_d65_vs_control_VPA_high_1B	chr1_93635520_93636735	102.9519703452	2.27143281477419	1.63008507141651e-11	9.77002220825606e-10	Intron (ENST00000260502.11/8412, intron 3 of 11)	BCAR3
control_d65_vs_control_VPA_high_1B	chr1_94078971_94080033	43.7479184552244	2.14224515483608	3.51822379289588e-06	6.52655723263188e-05	Exon (ENST00000370225.4/24, exon 9 of 50)	ABCA4
control_d65_vs_control_VPA_high_1B	chr1_94092158_94092839	41.7761613207002	1.50147621890669	0.000106615970733557	0.00124369286101303	Intron (ENST00000370225.4/24, intron 6 of 49)	ABCA4
control_d65_vs_control_VPA_high_1B	chr1_94592017_94593051	121.499424463704	1.56890581827421	2.31219489921226e-08	7.40206848206787e-07	Exon (ENST00000413541.1/ENST00000413541.1, exon 1 of 2)	SLC44A3-AS1
control_d65_vs_control_VPA_high_1B	chr1_95308345_95309509	42.3462884793658	1.40776871556883	0.000341165176756314	0.00329170482191879	Downstream (1-2kb)	LINC01760
control_d65_vs_control_VPA_high_1B	chr1_95407449_95408996	28.7768076832977	3.19488244030884	1.24534927170557e-07	3.34125701100158e-06	Distal Intergenic	LINC01650
control_d65_vs_control_VPA_high_1B	chr1_97119436_97120648	48.5300275185961	2.71612558252298	5.05942636051889e-07	1.17322370337216e-05	Intron (ENST00000422980.1/100873932, intron 1 of 4)	DPYD-AS1
control_d65_vs_control_VPA_high_1B	chr1_97144463_97146080	82.1649925367633	2.98594069301636	1.14270780334332e-17	1.89355136961993e-15	Intron (ENST00000422980.1/100873932, intron 1 of 4)	DPYD-AS1
control_d65_vs_control_VPA_high_1B	chr1_98086671_98087523	21.9916558532523	2.51811183918835	0.000108597404477792	0.00126399592415659	Distal Intergenic	MIR137HG
control_d65_vs_control_VPA_high_1B	chr1_98704421_98705115	22.1322368933398	2.83069375374083	3.65426523362913e-05	0.000498776554099988	Intron (ENST00000529992.5/51375, intron 6 of 7)	SNX7
control_d65_vs_control_VPA_high_1B	chr1_99180258_99181261	35.5849724408897	2.20162772669632	2.97684656960341e-07	7.29827150736886e-06	Intron (ENST00000660510.1/100129620, intron 2 of 4)	PLPPR4
control_d65_vs_control_VPA_high_1B	chr1_99645220_99646687	36.7110662961258	1.33800505475752	0.00117751659339439	0.00903793403768663	Promoter (<=1kb)	PALMD
control_d65_vs_control_VPA_high_1B	chr1_99767818_99768933	30.0484479610366	2.32564860978571	3.25113226551341e-05	0.000450664218483441	Promoter (1-2kb)	FRRS1
control_d65_vs_control_VPA_high_1B	chr1_100188007_100189296	27.7393614082739	2.19745186960665	2.14514870947042e-07	5.44123698483383e-06	3' UTR	LRRC39
control_d65_vs_control_VPA_high_1B	chr1_100362767_100363306	22.2196932706534	2.18275484420023	0.000161331018061226	0.00176493760983608	Promoter (<=1kb)	CDC14A
control_d65_vs_control_VPA_high_1B	chr1_100847183_100848228	31.2346542373023	3.800287106932	1.3926914816044e-09	5.71132433844702e-08	Distal Intergenic	EXTL2
control_d65_vs_control_VPA_high_1B	chr1_101068503_101069723	37.4596591731975	2.72659687013163	6.38046267708653e-07	1.44255228972794e-05	Promoter (2-3kb)	LOC102606465
control_d65_vs_control_VPA_high_1B	chr1_101203793_101205820	37.4394388414086	3.05882488594557	5.43783696249696e-12	3.52983082750218e-10	Distal Intergenic	LOC101928370
control_d65_vs_control_VPA_high_1B	chr1_101250319_101251368	26.5443871626296	2.20769829368315	6.81671013368109e-06	0.000116173711063417	Distal Intergenic	S1PR1
control_d65_vs_control_VPA_high_1B	chr1_101315888_101316930	38.1906357947116	2.89469224563248	1.47153331081799e-09	6.00131504456471e-08	Distal Intergenic	LINC01307
control_d65_vs_control_VPA_high_1B	chr1_103109299_103109970	22.8294104915638	1.44601823889133	0.00484293156341275	0.0275142223962631	Promoter (<=1kb)	COL11A1
control_d65_vs_control_VPA_high_1B	chr1_106063336_106064152	28.1754822530161	2.70250190995264	4.81280273099586e-07	1.12435599814028e-05	Intron (ENST00000634380.1/ENST00000634380.1, intron 7 of 7)	LINC01677
control_d65_vs_control_VPA_high_1B	chr1_107175176_107175975	20.8141001718124	1.99885847632182	0.000881271593742266	0.00716234373475806	Intron (ENST00000370071.6/22854, intron 2 of 7)	NTNG1
control_d65_vs_control_VPA_high_1B	chr1_107867070_107868164	38.0240508631771	1.89343343827255	3.66787574248111e-05	0.000500497198823081	Intron (ENST00000370056.9/10451, intron 2 of 26)	MIR7852
control_d65_vs_control_VPA_high_1B	chr1_108051446_108052460	70.2836120937696	2.906724128517	2.36364027390836e-11	1.37370913715025e-09	Exon (ENST00000634635.1/ENST00000634635.1, exon 2 of 5)	VAV3
control_d65_vs_control_VPA_high_1B	chr1_109083385_109084447	35.0170653171213	2.303322042186	2.63436159243582e-07	6.53902933639287e-06	Distal Intergenic	TMEM167B
control_d65_vs_control_VPA_high_1B	chr1_109113619_109114633	56.8506135337818	1.97814006657198	1.52668397120806e-09	6.20086273277185e-08	Promoter (<=1kb)	C1orf194
control_d65_vs_control_VPA_high_1B	chr1_109229325_109230438	132.028365604409	2.9529144762724	2.93585867083905e-17	4.5333205468403e-15	Promoter (<=1kb)	SARS1
control_d65_vs_control_VPA_high_1B	chr1_109254755_109255662	50.5679152465996	2.28107041383405	1.93177425812758e-06	3.86599208172574e-05	Intron (ENST00000271332.4/1952, intron 1 of 33)	CELSR2
control_d65_vs_control_VPA_high_1B	chr1_109259713_109260493	27.7494310670887	1.4948214367319	0.00765171023582288	0.039087172731405	Intron (ENST00000271332.4/1952, intron 2 of 33)	CELSR2
control_d65_vs_control_VPA_high_1B	chr1_109306826_109308031	27.2514638327629	1.38339025077994	0.00492009909144962	0.027852617523829	Promoter (<=1kb)	MYBPHL
control_d65_vs_control_VPA_high_1B	chr1_110136742_110137449	27.4447214357166	2.00829641159734	6.72209952593906e-05	0.000841247819761345	Distal Intergenic	SLC6A17
control_d65_vs_control_VPA_high_1B	chr1_110495495_110496400	22.4330691490449	1.47837276790625	0.00313196962734686	0.0196168541594585	Distal Intergenic	CYMP-AS1
control_d65_vs_control_VPA_high_1B	chr1_110581592_110582907	35.3330290171812	2.05056163450755	2.53742928722211e-06	4.90236846957335e-05	Intron (ENST00000640680.1/3737, intron 2 of 8)	KCNA2
control_d65_vs_control_VPA_high_1B	chr1_110674193_110675653	88.9866375194161	1.00774289641901	0.000492702521850732	0.00446183059650461	Promoter (<=1kb)	KCNA3
control_d65_vs_control_VPA_high_1B	chr1_111219349_111220149	21.2482776702151	1.78574994263082	0.00439627032017715	0.0255660580310404	Intron (ENST00000445067.6/1117, intron 1 of 12)	CHI3L2
control_d65_vs_control_VPA_high_1B	chr1_111748522_111749800	21.4376003621605	2.83431695013397	1.04732678292796e-05	0.000169135130322065	Intron (ENST00000444059.2/55924, intron 1 of 1)	DDX20
control_d65_vs_control_VPA_high_1B	chr1_111903644_111905300	44.1009118410407	2.02893874499	2.46088485964457e-07	6.15517632660862e-06	Intron (ENST00000369697.5/3752, intron 1 of 5)	KCND3-AS1
control_d65_vs_control_VPA_high_1B	chr1_111908933_111909513	24.0625971641046	4.44913523067604	3.22593407565103e-10	1.51169970438347e-08	Promoter (<=1kb)	KCND3-AS1
control_d65_vs_control_VPA_high_1B	chr1_111948089_111949243	27.4278145372494	2.63689028155654	2.32085550486856e-06	4.53004270511631e-05	Intron (ENST00000369697.5/3752, intron 1 of 5)	KCND3
control_d65_vs_control_VPA_high_1B	chr1_113058811_113060060	30.9701886478141	1.34013999570947	0.00186420620804682	0.0130453206988908	Intron (ENST00000421157.2/100996251, intron 1 of 2)	LRIG2-DT
control_d65_vs_control_VPA_high_1B	chr1_113976526_113977292	20.085823171463	1.78629550985346	0.00796599954674877	0.0403094338278	Promoter (2-3kb)	OLFML3
control_d65_vs_control_VPA_high_1B	chr1_115056196_115056930	21.3583518806014	2.79482704115959	2.64350961869824e-05	0.000377352716397436	Promoter (1-2kb)	TSPAN2
control_d65_vs_control_VPA_high_1B	chr1_115089076_115090322	55.0376451530938	1.88538847703707	1.64855584121412e-06	3.35785238298426e-05	Promoter (<=1kb)	TSPAN2
control_d65_vs_control_VPA_high_1B	chr1_115676728_115677934	38.1560584583585	2.05768532968762	6.58705499364788e-06	0.000112858020177373	Intron (ENST00000355485.7/81839, intron 4 of 7)	VANGL1
control_d65_vs_control_VPA_high_1B	chr1_116033015_116034083	30.9750174270582	2.32882999122689	0.000104584504397376	0.00122328830684734	Promoter (<=1kb)	SLC22A15
control_d65_vs_control_VPA_high_1B	chr1_116311564_116313109	46.8019064909579	1.8450345499645	2.99924821202299e-06	5.66758894656654e-05	Distal Intergenic	ATP1A1
control_d65_vs_control_VPA_high_1B	chr1_116646446_116647220	26.8919489091721	1.58759383795206	0.000830726709556289	0.00682726115778397	Promoter (<=1kb)	IGSF3
control_d65_vs_control_VPA_high_1B	chr1_116710530_116711740	21.0456987420485	1.86848060117949	0.000549758252872724	0.00487791466048721	Distal Intergenic	C1orf137
control_d65_vs_control_VPA_high_1B	chr1_116762943_116763848	35.8193623710935	1.36187740136393	0.00133574660615765	0.0100122482779133	Intron (ENST00000369478.4/914, intron 3 of 4)	CD2
control_d65_vs_control_VPA_high_1B	chr1_116824904_116826241	25.4561623506812	2.06330933471177	6.31711359625658e-05	0.000797979422697778	Distal Intergenic	CD2
control_d65_vs_control_VPA_high_1B	chr1_116877946_116879582	87.1036360993692	1.13142206830566	8.51378180830039e-06	0.000141079663205108	Distal Intergenic	PTGFRN
control_d65_vs_control_VPA_high_1B	chr1_116915252_116916373	20.3983579614136	2.56595702851772	3.68550345572741e-06	6.7919975213593e-05	Intron (ENST00000393203.3/5738, intron 1 of 8)	PTGFRN
control_d65_vs_control_VPA_high_1B	chr1_117171754_117172662	76.4703634987958	1.17069407771792	8.40341065156098e-05	0.00101717548105293	Promoter (<=1kb)	VTCN1
control_d65_vs_control_VPA_high_1B	chr1_119327029_119328254	38.1085952972461	2.29811187309628	3.86526728976317e-06	7.08659590862805e-05	Promoter (<=1kb)	LINC01780
control_d65_vs_control_VPA_high_1B	chr1_147072394_147073441	25.305400729703	1.6955666939568	0.00328839129108214	0.0203807875361292	Distal Intergenic	RNVU1-8
control_d65_vs_control_VPA_high_1B	chr1_148361294_148363058	32.6650670561405	1.2953333250213	0.00423828996563198	0.0248576348668355	Promoter (<=1kb)	RNVU1-1
control_d65_vs_control_VPA_high_1B	chr1_150798302_150799171	23.5755889733339	2.0504407122082	0.000234852041650045	0.00241473153985815	Exon (ENST00000271651.8/1513, exon 7 of 8)	CTSK
control_d65_vs_control_VPA_high_1B	chr1_151709917_151710862	53.0060556181053	2.30047688546816	0.000451009483377577	0.00414967859657465	Promoter (<=1kb)	CELF3
control_d65_vs_control_VPA_high_1B	chr1_151715864_151717324	87.0392556866045	2.01390620968423	3.87212837724118e-12	2.58590721437026e-10	Promoter (<=1kb)	CELF3
control_d65_vs_control_VPA_high_1B	chr1_151972504_151973468	24.7721813793354	2.17403063167857	1.42943730123132e-05	0.000221787521988837	Distal Intergenic	S100A10
control_d65_vs_control_VPA_high_1B	chr1_153465617_153467067	22.0104317598389	1.9192083402332	0.00188765548624158	0.0131629189587145	Distal Intergenic	S100A7
control_d65_vs_control_VPA_high_1B	chr1_155196002_155196693	79.7756821749806	1.60822112206116	4.39988428465989e-07	1.03847896354465e-05	Promoter (<=1kb)	THBS3
control_d65_vs_control_VPA_high_1B	chr1_155499639_155500765	20.287706127069	2.4773844883552	3.94321309808995e-06	7.21093255895642e-05	Intron (ENST00000368346.7/55870, intron 2 of 27)	ASH1L-AS1
control_d65_vs_control_VPA_high_1B	chr1_155595848_155596745	25.6858196297634	3.91505828161853	2.63134184114689e-10	1.25309954769534e-08	Intron (ENST00000441522.2/ENST00000441522.2, intron 1 of 2)	MSTO1
control_d65_vs_control_VPA_high_1B	chr1_156401637_156402534	22.035930539183	1.5755226767948	0.00342590064693135	0.0210449433961183	Downstream (1-2kb)	C1orf61
control_d65_vs_control_VPA_high_1B	chr1_156430175_156431361	25.7107270506456	1.87479304815461	0.00041989577212435	0.00390887001914172	Promoter (<=1kb)	C1orf61
control_d65_vs_control_VPA_high_1B	chr1_156673412_156674459	114.302085953069	2.39890863261638	7.14920336319738e-14	6.49277946988586e-12	Promoter (2-3kb)	NES
control_d65_vs_control_VPA_high_1B	chr1_158007378_158008420	23.2690238820251	1.46885744783198	0.00693415302352441	0.0362518665208098	Intron (ENST00000360089.8/55243, intron 1 of 12)	KIRREL1
control_d65_vs_control_VPA_high_1B	chr1_158180741_158181740	36.0498175490562	1.10961712268546	0.0089618897464306	0.0440517044357528	Promoter (<=1kb)	CD1D
control_d65_vs_control_VPA_high_1B	chr1_159141435_159142594	57.4061860107292	3.37478045253964	1.5536635342573e-17	2.50665862023021e-15	Promoter (<=1kb)	AIM2
control_d65_vs_control_VPA_high_1B	chr1_159171108_159173297	85.4967214933928	2.18018565596101	1.13155131621896e-11	6.96634430768943e-10	Promoter (<=1kb)	CADM3
control_d65_vs_control_VPA_high_1B	chr1_159187750_159189103	62.1873519492435	1.88789687174571	1.11994903032327e-05	0.000179655073146232	Intron (ENST00000368124.8/57863, intron 1 of 9)	CADM3-AS1
control_d65_vs_control_VPA_high_1B	chr1_159831362_159832218	21.3341349980941	3.04223401835864	2.99215815890005e-07	7.33490851382304e-06	Promoter (<=1kb)	SLAMF8
control_d65_vs_control_VPA_high_1B	chr1_159941035_159942313	48.0541797347835	1.9599340567602	2.55246000233034e-06	4.92758756173295e-05	Intron (ENST00000476102.1/57549, intron 3 of 19)	IGSF9
control_d65_vs_control_VPA_high_1B	chr1_160061402_160062809	49.9773746022567	2.16206711820952	1.56574653165516e-07	4.10043757355923e-06	Exon (ENST00000435580.2/ENST00000435580.2, exon 1 of 5)	KCNJ10
control_d65_vs_control_VPA_high_1B	chr1_160081206_160081720	20.3953165896392	4.14791611265459	2.3270922434059e-09	9.12463671034604e-08	Promoter (<=1kb)	KCNJ9
control_d65_vs_control_VPA_high_1B	chr1_160210591_160211499	26.4494678039939	3.11336368432249	4.33615059111132e-09	1.61720163842035e-07	Promoter (<=1kb)	PEA15
control_d65_vs_control_VPA_high_1B	chr1_160374502_160376880	87.9690474170409	1.44093558342134	2.12973803066238e-06	4.21519814793906e-05	Distal Intergenic	NHLH1
control_d65_vs_control_VPA_high_1B	chr1_160410237_160411680	141.357948032303	1.25744641526814	1.02626421364535e-06	2.20359398894169e-05	Intron (ENST00000368061.3/57216, intron 1 of 7)	VANGL2
control_d65_vs_control_VPA_high_1B	chr1_162091574_162092580	32.9860321899232	1.76312082960933	0.00079946617654552	0.00662387300206331	Intron (ENST00000361897.10/9722, intron 1 of 9)	NOS1AP
control_d65_vs_control_VPA_high_1B	chr1_162248527_162249834	77.0550957750788	2.00193348408545	1.17864678034612e-08	4.00474724859176e-07	Intron (ENST00000361897.10/9722, intron 2 of 9)	MIR4654
control_d65_vs_control_VPA_high_1B	chr1_163426596_163428037	34.0975569452256	3.66768801689024	4.32202319939352e-05	0.000576923822623745	Distal Intergenic	NUF2
control_d65_vs_control_VPA_high_1B	chr1_164588510_164589398	61.9348369804816	1.18568073177316	0.000825831683731893	0.00679908490584471	Promoter (<=1kb)	PBX1
control_d65_vs_control_VPA_high_1B	chr1_164635026_164636198	38.0497604835126	2.33380322950765	3.22161301239954e-07	7.83954672326416e-06	Intron (ENST00000340699.7/5087, intron 3 of 3)	PBX1
control_d65_vs_control_VPA_high_1B	chr1_164637476_164638938	41.0460933737088	2.26202609894581	1.32912104920816e-07	3.54225551459504e-06	Intron (ENST00000340699.7/5087, intron 3 of 3)	PBX1
control_d65_vs_control_VPA_high_1B	chr1_164735332_164736493	28.0464802449567	2.46698173952719	1.77427496630837e-06	3.58171764489832e-05	Intron (ENST00000340699.7/5087, intron 3 of 3)	PBX1
control_d65_vs_control_VPA_high_1B	chr1_164771297_164772167	24.3997188728664	1.61039766719553	0.00188426487527291	0.0131455402052969	Promoter (<=1kb)	PBX1
control_d65_vs_control_VPA_high_1B	chr1_164836426_164837537	32.053971579209	4.21062245017892	3.19995074895554e-14	3.08909143826291e-12	Intron (ENST00000420696.6/5087, intron 8 of 8)	PBX1
control_d65_vs_control_VPA_high_1B	chr1_166888458_166889321	22.5728807252305	2.46229791787742	9.30703798654331e-05	0.00110824968309268	Distal Intergenic	TADA1
control_d65_vs_control_VPA_high_1B	chr1_166947117_166948119	110.782733115407	1.62984782905725	1.64014132383559e-08	5.43050592763744e-07	Intron (ENST00000271417.8/387597, intron 3 of 9)	ILDR2
control_d65_vs_control_VPA_high_1B	chr1_167056943_167057739	25.9803530763308	1.66534015960978	0.000460954725134702	0.00422655262576249	Intron (ENST00000417644.1/ENST00000417644.1, intron 1 of 1)	GPA33
control_d65_vs_control_VPA_high_1B	chr1_167165836_167166981	24.8224269165865	2.34461330134982	1.35894019057878e-05	0.000212236987802504	Promoter (<=1kb)	GPA33
control_d65_vs_control_VPA_high_1B	chr1_167198384_167199168	22.7083092589437	1.95995531521631	0.000448620081643517	0.00413169872004197	Promoter (2-3kb)	LINC01363
control_d65_vs_control_VPA_high_1B	chr1_167231631_167232527	25.0247288998031	2.30041180628655	3.50456222971069e-05	0.000480944831504824	Intron (ENST00000559038.5/5451, intron 1 of 4)	POU2F1
control_d65_vs_control_VPA_high_1B	chr1_167328215_167329609	59.4686874885875	3.000345845587	1.28917805460338e-17	2.11475891506999e-15	Promoter (<=1kb)	POU2F1
control_d65_vs_control_VPA_high_1B	chr1_167430118_167431959	36.9380091395172	1.91011745954079	2.23621974404442e-06	4.38761280606574e-05	Promoter (2-3kb)	CD247
control_d65_vs_control_VPA_high_1B	chr1_167488786_167490290	77.292446550786	1.51916995928598	0.000214408007962028	0.00223929264710004	Intron (ENST00000483825.5/919, intron 1 of 6)	CD247
control_d65_vs_control_VPA_high_1B	chr1_168387066_168388393	20.5834365769914	1.88418582745702	0.000869526663194924	0.00708421866115969	Distal Intergenic	MIR557
control_d65_vs_control_VPA_high_1B	chr1_169309015_169309969	27.6183937600735	4.59419975186275	2.78796777125164e-08	8.73567714071849e-07	Promoter (<=1kb)	NME7
control_d65_vs_control_VPA_high_1B	chr1_169999199_170000153	32.9849274076119	1.11582772574169	0.00933267692062829	0.0454073956218775	Intron (ENST00000367765.5/22920, intron 10 of 19)	KIFAP3
control_d65_vs_control_VPA_high_1B	chr1_170145613_170146480	42.0293469322	1.97636713702052	0.000240943517907357	0.00246692997024962	Promoter (<=1kb)	METTL11B
control_d65_vs_control_VPA_high_1B	chr1_171898809_171899551	37.0284627010917	2.55130736375533	3.86410258601404e-07	9.23502450679241e-06	Intron (ENST00000367733.6/26052, intron 1 of 14)	DNM3-IT1
control_d65_vs_control_VPA_high_1B	chr1_171909276_171910635	31.0934977196903	2.08828702079796	5.23084542281657e-05	0.00067918199156959	Intron (ENST00000367733.6/26052, intron 1 of 14)	DNM3-IT1
control_d65_vs_control_VPA_high_1B	chr1_172460600_172461436	20.2134242431815	2.18305971078256	0.000623839565508113	0.00540507310612744	Intron (ENST00000367727.9/92346, intron 4 of 6)	C1orf105
control_d65_vs_control_VPA_high_1B	chr1_174799286_174800144	110.698741747985	1.00760705206625	3.05651924074669e-06	5.75902537396872e-05	Promoter (<=1kb)	RABGAP1L
control_d65_vs_control_VPA_high_1B	chr1_174800166_174800869	21.3809910824502	2.10082087759337	6.58997085354684e-05	0.000827100881301485	Promoter (<=1kb)	RABGAP1L
control_d65_vs_control_VPA_high_1B	chr1_175089224_175089978	20.5159557509435	3.12733777326855	3.45692758167987e-05	0.000475422342668199	Intron (ENST00000239462.9/63923, intron 6 of 18)	TNN
control_d65_vs_control_VPA_high_1B	chr1_175129635_175130797	39.7581999612749	1.86886871049983	0.000642797076022453	0.00553755513901348	Intron (ENST00000239462.9/63923, intron 15 of 18)	KIAA0040
control_d65_vs_control_VPA_high_1B	chr1_175742932_175744001	20.332919309668	3.41070076238872	1.24605123717794e-06	2.62324775505834e-05	Promoter (<=1kb)	TNR
control_d65_vs_control_VPA_high_1B	chr1_175841230_175842404	20.2026298579387	2.1475490260377	0.000211937148823181	0.00221825175203748	Distal Intergenic	LINC01657
control_d65_vs_control_VPA_high_1B	chr1_175865096_175865895	22.8515940831844	2.45320900983599	8.00779937149262e-05	0.000976523382583697	Distal Intergenic	LINC01657
control_d65_vs_control_VPA_high_1B	chr1_176996033_176997269	33.6147494878313	2.33306156695486	6.87103869874371e-05	0.000856767423806696	Intron (ENST00000367657.7/460, intron 8 of 22)	MIR488
control_d65_vs_control_VPA_high_1B	chr1_177164071_177165404	44.8456227894347	1.30476555691085	0.00516279659801389	0.0289136915473431	Promoter (<=1kb)	ASTN1
control_d65_vs_control_VPA_high_1B	chr1_177170547_177171573	70.4827368589409	1.51655345090179	5.02079296994536e-07	1.16570579476675e-05	Promoter (<=1kb)	BRINP2
control_d65_vs_control_VPA_high_1B	chr1_177310241_177311834	41.4370172812041	2.71757652380879	1.6740804868281e-08	5.53618528081012e-07	Distal Intergenic	LINC01645
control_d65_vs_control_VPA_high_1B	chr1_178052794_178053808	29.8119698776729	1.34779046267529	0.00214354399244322	0.0145580861910989	Distal Intergenic	CRYZL2P-SEC16B
control_d65_vs_control_VPA_high_1B	chr1_178266480_178267166	26.8430831404805	2.70541032452385	0.000249073613416005	0.00253597367281408	Intron (ENST00000367649.7/9462, intron 1 of 17)	RASAL2
control_d65_vs_control_VPA_high_1B	chr1_178581213_178582296	24.0024531781494	1.99891854385423	0.000348764454196193	0.00335271014568566	Distal Intergenic	C1orf220
control_d65_vs_control_VPA_high_1B	chr1_178645195_178645924	21.6459075909409	1.8404854634171	0.00126137799756968	0.00956195224944007	Distal Intergenic	MIR4424
control_d65_vs_control_VPA_high_1B	chr1_178650801_178652431	39.6125953596168	2.19771601507538	4.55367288334662e-08	1.35486040985614e-06	Exon (ENST00000608190.1/ENST00000608190.1, exon 1 of 1)	MIR4424
control_d65_vs_control_VPA_high_1B	chr1_180424717_180425565	30.6557832947274	3.50882325036006	9.2181216757433e-10	3.94587864198566e-08	Intron (ENST00000642319.1/100527964, intron 4 of 13)	ACBD6
control_d65_vs_control_VPA_high_1B	chr1_180548527_180549671	35.6709623659366	1.4780833447151	0.00107223578746083	0.0083858101646658	Promoter (1-2kb)	OVAAL
control_d65_vs_control_VPA_high_1B	chr1_180594386_180595425	36.5163161429702	2.67258577901223	1.59799174546525e-09	6.46414899536357e-08	Distal Intergenic	OVAAL
control_d65_vs_control_VPA_high_1B	chr1_180836321_180837500	40.6755468351194	2.86446153814666	4.6057278035928e-09	1.71102015418377e-07	Promoter (<=1kb)	XPR1
control_d65_vs_control_VPA_high_1B	chr1_180842039_180843295	38.8799739419005	2.25230226841742	1.63688835104188e-05	0.000249051400722634	Intron (ENST00000367590.9/9213, intron 11 of 14)	XPR1
control_d65_vs_control_VPA_high_1B	chr1_181117469_181118456	31.1737885241364	1.76537953040867	0.000125947238410312	0.00143280706432358	Distal Intergenic	IER5
control_d65_vs_control_VPA_high_1B	chr1_181128420_181129327	37.9890821958088	1.18234095607558	0.00912027009243989	0.0446310232189592	Distal Intergenic	IER5
control_d65_vs_control_VPA_high_1B	chr1_181485237_181486220	36.304777723675	2.25412941569593	1.49404205512271e-06	3.07772354573206e-05	Promoter (1-2kb)	CACNA1E
control_d65_vs_control_VPA_high_1B	chr1_181675357_181676702	32.6942820975396	1.81622470215622	0.00048053839749736	0.00437253091964163	Intron (ENST00000524607.6/777, intron 9 of 11)	CACNA1E
control_d65_vs_control_VPA_high_1B	chr1_181759464_181760489	28.6926200998661	3.08459833901326	6.76098113531983e-07	1.5189615072709e-05	Intron (ENST00000367573.7/777, intron 32 of 47)	CACNA1E
control_d65_vs_control_VPA_high_1B	chr1_182611713_182612288	28.5837597739318	1.69291939038926	0.00206317655465907	0.0141301402915129	Promoter (2-3kb)	LINC01686
control_d65_vs_control_VPA_high_1B	chr1_182633499_182634255	26.0644171318877	2.23341328753584	0.00029994431904545	0.00296091414402468	Distal Intergenic	LINC01686
control_d65_vs_control_VPA_high_1B	chr1_182662146_182663007	26.2328935323741	2.06748562825673	0.00117935812730527	0.00904803446923056	Intron (ENST00000258302.8/85397, intron 4 of 5)	RGS8
control_d65_vs_control_VPA_high_1B	chr1_182671670_182672586	26.7368261799944	1.47100679764773	0.00130647162001546	0.00983682926286458	Promoter (<=1kb)	RGS8
control_d65_vs_control_VPA_high_1B	chr1_182683558_182684867	24.6706713621958	2.06039858482111	8.82183116423246e-05	0.00106063545859294	Promoter (<=1kb)	RGS8
control_d65_vs_control_VPA_high_1B	chr1_182739385_182740347	29.4658193285462	1.87255655691365	0.000150728855772205	0.00166833640723436	Distal Intergenic	LINC01688
control_d65_vs_control_VPA_high_1B	chr1_182833969_182834836	32.7361100784138	2.2463600189619	6.37653149505881e-07	1.44201480137719e-05	Downstream (2-3kb)	DHX9
control_d65_vs_control_VPA_high_1B	chr1_182972669_182973823	20.0338849328221	2.08656229245667	0.00114718348163119	0.00885180717357274	Distal Intergenic	SHCBP1L
control_d65_vs_control_VPA_high_1B	chr1_183403367_183404898	33.1918446492349	1.56492371203638	0.0016166102196009	0.0116691435322813	Intron (ENST00000287713.7/23057, intron 1 of 10)	NMNAT2
control_d65_vs_control_VPA_high_1B	chr1_184330211_184331300	22.775791178408	2.66383275860968	3.9404630962768e-05	0.00053276963944004	Intron (ENST00000449525.1/ENST00000449525.1, intron 1 of 1)	C1orf21
control_d65_vs_control_VPA_high_1B	chr1_184497818_184498456	21.8321581995334	2.20187444297123	0.00473831203683401	0.0270639624586118	Intron (ENST00000235307.7/81563, intron 2 of 5)	C1orf21
control_d65_vs_control_VPA_high_1B	chr1_184574375_184575349	28.6371191232892	1.98366918631481	0.00491326414148699	0.0278194550387385	Intron (ENST00000235307.7/81563, intron 3 of 5)	C1orf21
control_d65_vs_control_VPA_high_1B	chr1_184610709_184611878	46.8698895024471	3.26071792206444	9.71306924779778e-15	1.01428051454767e-12	Exon (ENST00000660403.1/ENST00000660403.1, exon 3 of 4)	C1orf21
control_d65_vs_control_VPA_high_1B	chr1_185008486_185009353	22.7992900435377	2.85893277096007	1.22625124390718e-07	3.29533945090214e-06	Exon (ENST00000566476.2/101929069, exon 3 of 3)	LINC01633
control_d65_vs_control_VPA_high_1B	chr1_185646042_185646805	42.99600663271	2.15995119833904	9.13797547305775e-08	2.53566099478309e-06	Exon (ENST00000658071.1/ENST00000658071.1, exon 1 of 3)	LINC01350
control_d65_vs_control_VPA_high_1B	chr1_187122463_187123795	32.0073061401357	1.93461693893727	1.71135526690266e-05	0.000258828193679913	Intron (ENST00000643891.1/106144535, intron 2 of 8)	LINC01036
control_d65_vs_control_VPA_high_1B	chr1_187261498_187262156	20.6837721735322	3.591456250541	2.44979402119803e-07	6.13128234714051e-06	Promoter (<=1kb)	LINC01037
control_d65_vs_control_VPA_high_1B	chr1_190477948_190479421	60.992779871702	1.7718258937302	2.64734551402835e-06	5.08466845398877e-05	Promoter (<=1kb)	LINC01351
control_d65_vs_control_VPA_high_1B	chr1_193185952_193186891	27.0154581222003	1.2097656628095	0.00665894964667312	0.0351238318277379	Promoter (<=1kb)	CDC73
control_d65_vs_control_VPA_high_1B	chr1_196141903_196142952	60.629771844185	3.55870895523696	1.63953205077049e-05	0.000249358477296783	Distal Intergenic	LINC01724
control_d65_vs_control_VPA_high_1B	chr1_197268949_197269551	27.8487301911786	4.21481643705574	1.27180068309759e-11	7.75790633331618e-10	Promoter (<=1kb)	CRB1
control_d65_vs_control_VPA_high_1B	chr1_198295073_198295740	38.7525914319352	5.0543813193607	1.55389367978805e-08	5.17012961977711e-07	Intron (ENST00000538004.5/140609, intron 8 of 9)	NEK7
control_d65_vs_control_VPA_high_1B	chr1_198298427_198299146	21.0034345652575	2.93734097895729	2.23768115252268e-06	4.38961608965545e-05	Intron (ENST00000538004.5/140609, intron 9 of 9)	NEK7
control_d65_vs_control_VPA_high_1B	chr1_198788380_198789346	42.441818603472	2.3366166797391	3.20545302360526e-07	7.80403320033726e-06	Intron (ENST00000660348.1/100131234, intron 2 of 2)	PTPRC
control_d65_vs_control_VPA_high_1B	chr1_198902579_198903747	37.4499195468693	1.19598870949917	0.00248281360204267	0.0163443286544085	Intron (ENST00000660348.1/100131234, intron 1 of 2)	MIR181A1HG
control_d65_vs_control_VPA_high_1B	chr1_198935213_198936126	50.7928085960127	1.24403245251672	9.00317661621348e-05	0.00107857406594693	Promoter (1-2kb)	MIR181A1HG
control_d65_vs_control_VPA_high_1B	chr1_200081023_200082186	21.2884472081803	1.78869805203167	0.000699346128921959	0.00593801432350662	Intron (ENST00000236914.7/2494, intron 4 of 6)	NR5A2
control_d65_vs_control_VPA_high_1B	chr1_200302076_200303344	24.8557985465479	1.63624678757212	0.00109522644985067	0.00852914336557277	Intron (ENST00000636153.1/554279, intron 4 of 4)	LINC00862
control_d65_vs_control_VPA_high_1B	chr1_201014017_201014915	30.9948887173504	1.65393154863704	0.00216598129265534	0.0146783963409597	Intron (ENST00000332129.6/23046, intron 1 of 33)	KIF21B
control_d65_vs_control_VPA_high_1B	chr1_201108476_201109128	41.9527194679856	2.12469020413653	4.36873250611073e-06	7.89063468481607e-05	Intron (ENST00000362061.4/779, intron 2 of 43)	CACNA1S
control_d65_vs_control_VPA_high_1B	chr1_201686227_201687350	20.6611844064457	1.45337077125614	0.00656045345693115	0.034736650504008	Intron (ENST00000367302.5/89796, intron 3 of 29)	MIR5191
control_d65_vs_control_VPA_high_1B	chr1_201693888_201695212	58.7331471615265	1.73748006396574	1.49932323347722e-06	3.08700773911124e-05	Intron (ENST00000367302.5/89796, intron 3 of 29)	MIR5191
control_d65_vs_control_VPA_high_1B	chr1_201751616_201752830	85.6749029762724	2.80472995758087	1.96887693907235e-11	1.16409545499273e-09	Intron (ENST00000367302.5/89796, intron 5 of 29)	NAV1
control_d65_vs_control_VPA_high_1B	chr1_202130222_202131005	26.3284817463985	2.85422885603721	1.29472763016135e-07	3.4611609784383e-06	3' UTR	ARL8A
control_d65_vs_control_VPA_high_1B	chr1_202637948_202639058	34.7888958740679	1.96415307313966	0.00054585958260211	0.00484958215319548	Intron (ENST00000367267.5/127833, intron 1 of 8)	SYT2
control_d65_vs_control_VPA_high_1B	chr1_203324816_203325942	69.977505763601	1.08556841508121	0.00171129349844188	0.0122021241274861	Distal Intergenic	BTG2
control_d65_vs_control_VPA_high_1B	chr1_203996055_203997589	70.7439537576819	1.08077979564666	0.00233548990713981	0.0155839521683244	Exon (ENST00000655658.1/ENST00000655658.1, exon 1 of 3)	LINC00303
control_d65_vs_control_VPA_high_1B	chr1_204108323_204109338	83.5407173673779	1.29204925590206	0.0014271342709368	0.0105496906728285	Intron (ENST00000367203.8/9580, intron 1 of 6)	SOX13
control_d65_vs_control_VPA_high_1B	chr1_204255026_204256281	31.2143819870406	1.46039223596359	0.0101579953400038	0.0484810318676592	Exon (ENST00000637508.1/22874, exon 11 of 27)	PLEKHA6
control_d65_vs_control_VPA_high_1B	chr1_204359169_204360320	62.0482362146947	1.22264033494094	9.74813479144865e-05	0.00115299138372856	Promoter (<=1kb)	PLEKHA6
control_d65_vs_control_VPA_high_1B	chr1_204445834_204447440	43.2555059264314	1.92651979301309	5.75290383867823e-06	0.000100413130953958	Promoter (2-3kb)	PIK3C2B
control_d65_vs_control_VPA_high_1B	chr1_204454731_204455758	74.6645529522925	2.68119482762243	8.51108661601916e-10	3.66690598027656e-08	Promoter (<=1kb)	PIK3C2B
control_d65_vs_control_VPA_high_1B	chr1_204663607_204664781	28.1360680123599	2.77345275988749	3.68492872839587e-06	6.79156621940461e-05	Exon (ENST00000435021.1/ENST00000435021.1, exon 1 of 2)	LRRN2
control_d65_vs_control_VPA_high_1B	chr1_204706715_204707571	34.9467741781139	1.6279722487134	0.000279508112353015	0.00279124457294481	Exon (ENST00000516841.1/ENST00000516841.1, exon 1 of 1)	LRRN2
control_d65_vs_control_VPA_high_1B	chr1_204714783_204715686	31.6646668073586	2.18181519910814	4.55481504026832e-05	0.000603979628587875	Distal Intergenic	LRRN2
control_d65_vs_control_VPA_high_1B	chr1_204828229_204829143	42.8019707374229	1.13588976803375	0.00820915153425934	0.04123211775929	Promoter (<=1kb)	NFASC
control_d65_vs_control_VPA_high_1B	chr1_205042758_205043684	25.9920760266589	2.00688230800175	0.000235634314590694	0.00242140100398972	Promoter (<=1kb)	CNTN2
control_d65_vs_control_VPA_high_1B	chr1_205313355_205314556	151.369708395779	1.62413300673185	2.09560268165332e-10	1.01716584411216e-08	Intron (ENST00000367157.6/81788, intron 1 of 6)	NUAK2
control_d65_vs_control_VPA_high_1B	chr1_205350469_205351273	24.7585714549014	2.51981925189418	4.87619480489964e-05	0.000639632775927831	Exon (ENST00000432323.1/ENST00000432323.1, exon 1 of 1)	KLHDC8A
control_d65_vs_control_VPA_high_1B	chr1_205356505_205357270	43.0379142829494	1.77758296880063	6.62189580949236e-05	0.000830532554447631	Promoter (<=1kb)	KLHDC8A
control_d65_vs_control_VPA_high_1B	chr1_205359924_205360722	22.5476594389102	2.16616842159144	0.000302269498567632	0.00297919997562537	Promoter (2-3kb)	KLHDC8A
control_d65_vs_control_VPA_high_1B	chr1_205485219_205485898	28.0492433296481	1.26742307631613	0.00777863230767369	0.0395894412787357	Distal Intergenic	CDK18
control_d65_vs_control_VPA_high_1B	chr1_205495246_205496081	26.1204719071955	2.53139796865167	2.58461376912806e-06	4.97953432319128e-05	Distal Intergenic	CDK18
control_d65_vs_control_VPA_high_1B	chr1_208150899_208152446	21.71985152133	2.20353113354553	0.000149654090289525	0.00165858365946826	Intron (ENST00000367033.4/5362, intron 3 of 31)	PLXNA2
control_d65_vs_control_VPA_high_1B	chr1_208166750_208167886	27.2583830873635	2.40225442547101	1.10914977176753e-06	2.36197596840903e-05	Intron (ENST00000367033.4/5362, intron 3 of 31)	PLXNA2
control_d65_vs_control_VPA_high_1B	chr1_208198093_208198804	42.8126651040546	2.3159345745593	5.6097274534131e-05	0.000721282719896857	Intron (ENST00000367033.4/5362, intron 3 of 31)	PLXNA2
control_d65_vs_control_VPA_high_1B	chr1_208335325_208336628	64.2644615619153	2.08688886737966	1.86399245989954e-07	4.79643011373608e-06	Distal Intergenic	PLXNA2
control_d65_vs_control_VPA_high_1B	chr1_208732114_208733079	23.5787051710646	3.07345756749037	4.92244065375581e-07	1.14594050515427e-05	Intron (ENST00000666184.1/105372893, intron 3 of 4)	LINC01717
control_d65_vs_control_VPA_high_1B	chr1_208781394_208782329	24.044055328321	1.95149260860781	0.00153207472339997	0.0111654389318494	Distal Intergenic	LINC01717
control_d65_vs_control_VPA_high_1B	chr1_209455204_209456226	30.1470266863114	3.95347939218067	1.81082824923344e-11	1.07723476028556e-09	Distal Intergenic	MIR205
control_d65_vs_control_VPA_high_1B	chr1_209583401_209584459	35.6631514465276	1.12923310058971	0.00441911678623971	0.0256644793844062	Promoter (<=1kb)	CAMK1G
control_d65_vs_control_VPA_high_1B	chr1_209875487_209876224	20.9794843546757	1.95909781520583	0.000195877824863672	0.00207602471971366	Distal Intergenic	SYT14
control_d65_vs_control_VPA_high_1B	chr1_210482387_210483536	24.3703879070605	2.68387764017721	1.55487074505904e-07	4.07677579303615e-06	Intron (ENST00000413764.6/55733, intron 8 of 11)	HHAT
control_d65_vs_control_VPA_high_1B	chr1_212513904_212515897	45.1240363668036	1.80387973015228	1.15049555165678e-05	0.000183918754002063	Intron (ENST00000651527.1/ENST00000651527.1, intron 1 of 4)	LINC01740
control_d65_vs_control_VPA_high_1B	chr1_214008750_214010323	23.5482683740578	1.61609872943335	0.00275849160127409	0.017763737780966	Intron (ENST00000498508.6/5629, intron 3 of 4)	PROX1
control_d65_vs_control_VPA_high_1B	chr1_214192801_214193835	23.5380888903076	1.51729065777233	0.0045572967629331	0.0262801608523145	Distal Intergenic	SMYD2
control_d65_vs_control_VPA_high_1B	chr1_214264004_214264858	26.5873218564178	1.83861960921077	0.000227349729612366	0.00234898202546423	Distal Intergenic	SMYD2
control_d65_vs_control_VPA_high_1B	chr1_214976582_214977658	22.3713878897623	2.16291788143268	0.00351708853274129	0.0214845751893931	Intron (ENST00000658732.1/ENST00000658732.1, intron 1 of 1)	KCNK2
control_d65_vs_control_VPA_high_1B	chr1_216047712_216048859	25.5814840117544	2.70077437563609	4.93392676986172e-07	1.14834625319889e-05	Exon (ENST00000307340.8/7399, exon 31 of 72)	LOC102723833
control_d65_vs_control_VPA_high_1B	chr1_216182867_216184907	67.141467838628	2.25289523411923	1.08360195585827e-12	7.98269458582864e-11	Intron (ENST00000307340.8/7399, intron 20 of 71)	USH2A
control_d65_vs_control_VPA_high_1B	chr1_216387644_216389098	45.2072415989413	2.06452217749225	0.000178894939071768	0.00192384640058558	Intron (ENST00000307340.8/7399, intron 3 of 71)	USH2A
control_d65_vs_control_VPA_high_1B	chr1_216630393_216630995	26.521924673292	2.30811142320838	5.8178654484936e-05	0.000744443292698765	Intron (ENST00000616180.4/2104, intron 3 of 6)	ESRRG
control_d65_vs_control_VPA_high_1B	chr1_216814862_216816179	23.732960339451	1.39928559758907	0.00509110642895948	0.0285973598069079	Intron (ENST00000361525.7/2104, intron 3 of 8)	ESRRG
control_d65_vs_control_VPA_high_1B	chr1_216910218_216910985	23.2588220925844	2.7541397478099	4.01414015632414e-06	7.32182984355927e-05	Intron (ENST00000361525.7/2104, intron 2 of 8)	ESRRG
control_d65_vs_control_VPA_high_1B	chr1_217089446_217090374	26.9234287939206	1.73549901946707	0.000471116915774429	0.00430290812297119	Promoter (<=1kb)	ESRRG
control_d65_vs_control_VPA_high_1B	chr1_218078921_218079890	20.7764556538199	2.82756252287199	9.36119542329202e-06	0.000153350058579306	Distal Intergenic	LINC01653
control_d65_vs_control_VPA_high_1B	chr1_218493948_218495003	44.5713942186532	1.29666609846147	0.00392796000150622	0.0234213661898857	Promoter (<=1kb)	C1orf143
control_d65_vs_control_VPA_high_1B	chr1_219358884_219359879	34.519559027377	2.10509334062731	8.8357402650434e-06	0.000145881189239303	Distal Intergenic	LYPLAL1-AS1
control_d65_vs_control_VPA_high_1B	chr1_219554974_219556616	92.3323103502466	1.77396348587096	4.56244215782606e-12	3.00662675832726e-10	Distal Intergenic	ZC3H11B
control_d65_vs_control_VPA_high_1B	chr1_220487358_220488088	24.2276173685482	1.34413562945511	0.00832117764974256	0.0416517566141118	Exon (ENST00000446169.2/ENST00000446169.2, exon 1 of 3)	MARK1
control_d65_vs_control_VPA_high_1B	chr1_221708795_221709654	39.5951750792652	1.91317043301616	2.00722706291031e-05	0.000297584921971529	Promoter (2-3kb)	DUSP10
control_d65_vs_control_VPA_high_1B	chr1_223363005_223365360	120.386450161464	1.30731374898213	6.09832624475534e-08	1.76159533920736e-06	Promoter (<=1kb)	SUSD4
control_d65_vs_control_VPA_high_1B	chr1_223771438_223772527	23.9826023766182	2.48322840757252	1.35870464152485e-05	0.000212233455155471	Promoter (<=1kb)	CAPN2
control_d65_vs_control_VPA_high_1B	chr1_223780382_223781649	34.8350206246415	2.47643742513685	6.15322120635073e-07	1.39769830743071e-05	3' UTR	CAPN2
control_d65_vs_control_VPA_high_1B	chr1_224287480_224288237	36.1228807840752	3.59746466833603	1.76166857311572e-09	7.06034546393901e-08	Exon (ENST00000469968.5/4931, exon 12 of 21)	NVL
control_d65_vs_control_VPA_high_1B	chr1_224684811_224685477	21.5335070406075	2.50684665928351	0.000450352779145267	0.00414478416950565	Exon (ENST00000498382.5/149111, exon 3 of 6)	CNIH3
control_d65_vs_control_VPA_high_1B	chr1_225578198_225579006	20.7197914429969	1.60435881605487	0.00603640118985843	0.032581497078318	Promoter (1-2kb)	ENAH
control_d65_vs_control_VPA_high_1B	chr1_225914968_225915968	22.6208419297424	1.6127370027633	0.00245453624818311	0.0162031254695778	Intron (ENST00000432920.2/10637, intron 5 of 7)	LEFTY1
control_d65_vs_control_VPA_high_1B	chr1_226002690_226003212	29.5496804287458	3.095361119785	3.20067883318706e-08	9.89213213458151e-07	Distal Intergenic	SDE2
control_d65_vs_control_VPA_high_1B	chr1_226975099_226976151	22.9906915427501	3.05418119330822	3.06060587985694e-05	0.000427763822285607	Promoter (<=1kb)	COQ8A
control_d65_vs_control_VPA_high_1B	chr1_230153133_230154316	63.1065466404685	1.41055721805203	0.000110692718848045	0.00128396082459458	Intron (ENST00000494106.1/2590, intron 1 of 6)	GALNT2
control_d65_vs_control_VPA_high_1B	chr1_231923507_231924746	49.5917588623937	3.0481531675615	1.41927171306815e-12	1.02658250694225e-10	Promoter (1-2kb)	DISC1-IT1
control_d65_vs_control_VPA_high_1B	chr1_232555336_232556210	38.7072120620788	1.91769063758291	1.44355807776082e-05	0.000223717273240541	Intron (ENST00000366630.5/57568, intron 1 of 21)	SIPA1L2
control_d65_vs_control_VPA_high_1B	chr1_232620243_232621394	21.5499230341418	2.42303825658145	7.80202443085145e-06	0.000130873642055917	Distal Intergenic	SIPA1L2
control_d65_vs_control_VPA_high_1B	chr1_233904358_233906028	56.7373561202793	1.22970291394256	0.001665434698179	0.011940217419284	Promoter (<=1kb)	SLC35F3
control_d65_vs_control_VPA_high_1B	chr1_234229560_234230901	26.9283025364691	1.92890789893856	0.000114261058079948	0.00131936311886036	Intron (ENST00000366618.8/148641, intron 2 of 7)	SLC35F3
control_d65_vs_control_VPA_high_1B	chr1_235910119_235911038	65.5658890598193	1.28159227960376	0.000499047559555302	0.00450741401871738	Distal Intergenic	LYST
control_d65_vs_control_VPA_high_1B	chr1_236486002_236487709	20.2539695550818	2.06289474995432	0.000276512562913385	0.00276673560038808	Intron (ENST00000642595.1/128178, intron 5 of 7)	LGALS8
control_d65_vs_control_VPA_high_1B	chr1_237041735_237043318	65.2353291346021	1.37475530692237	6.15143497710265e-05	0.00077991729119475	Promoter (<=1kb)	RYR2
control_d65_vs_control_VPA_high_1B	chr1_238458748_238459502	32.4307683852512	2.1529664162095	7.05361481049335e-05	0.000875917210498104	Distal Intergenic	LINC01139
control_d65_vs_control_VPA_high_1B	chr1_239386022_239387955	85.5158358039952	1.11264428790101	0.000466452029371905	0.00426890764150086	Promoter (<=1kb)	CHRM3
control_d65_vs_control_VPA_high_1B	chr1_239811087_239811812	35.603731944464	3.44426200912565	7.33770052052874e-08	2.08009165391755e-06	Intron (ENST00000468573.5/1131, intron 6 of 8)	CHRM3-AS2
control_d65_vs_control_VPA_high_1B	chr1_239857602_239858567	28.7030900023133	2.85952746444288	2.91972639511652e-07	7.18026193349966e-06	Intron (ENST00000468573.5/1131, intron 8 of 8)	CHRM3-AS1
control_d65_vs_control_VPA_high_1B	chr1_240091129_240093896	144.784206110753	1.01286666950352	4.99126082346445e-06	8.86324496805937e-05	Promoter (<=1kb)	FMN2
control_d65_vs_control_VPA_high_1B	chr1_241356169_241357623	100.044703795069	1.02889199301064	8.25257025286321e-05	0.00100171519797069	Promoter (<=1kb)	RGS7
control_d65_vs_control_VPA_high_1B	chr1_241423653_241424909	49.1178843353444	1.68638938940009	0.00024884230854416	0.00253387745002013	Exon (ENST00000660219.1/ENST00000660219.1, exon 1 of 5)	RGS7
control_d65_vs_control_VPA_high_1B	chr1_242224396_242225497	34.0493209598419	2.2526274698819	3.23660254831645e-06	6.06223594472132e-05	Intron (ENST00000536534.6/200150, intron 4 of 9)	PLD5
control_d65_vs_control_VPA_high_1B	chr1_242523369_242525705	87.2628893228721	1.30459321682785	3.3049339740982e-05	0.00045742232035033	Promoter (<=1kb)	PLD5
control_d65_vs_control_VPA_high_1B	chr1_242585607_242586897	58.9672583531466	2.47250339921191	1.91082097806552e-05	0.00028503031928573	Distal Intergenic	PLD5
control_d65_vs_control_VPA_high_1B	chr1_244011469_244012614	28.2802058287121	2.51199111701595	3.40642839135178e-06	6.34692844286766e-05	Intron (ENST00000440494.1/339529, intron 6 of 11)	ZBTB18
control_d65_vs_control_VPA_high_1B	chr1_244053685_244054372	31.6253815715581	2.07056599920386	2.19877490575489e-05	0.000322386718419104	Promoter (2-3kb)	ZBTB18
control_d65_vs_control_VPA_high_1B	chr1_244064749_244066409	21.3207268239031	1.76751260995551	0.00266518308791477	0.017285710171898	Exon (ENST00000623669.1/ENST00000623669.1, exon 1 of 1)	ZBTB18
control_d65_vs_control_VPA_high_1B	chr1_244341262_244342168	22.7394945363571	2.32927940332777	0.000173657862842299	0.00187641608359049	Distal Intergenic	C1orf100
control_d65_vs_control_VPA_high_1B	chr1_245180470_245181585	33.794151252331	2.16860031789647	2.54785418166924e-05	0.000365846387451586	Intron (ENST00000407071.7/55083, intron 2 of 14)	KIF26B
control_d65_vs_control_VPA_high_1B	chr1_246492290_246493073	20.2115460404469	1.61499920729776	0.00094327314801114	0.00756721513797049	Intron (ENST00000490107.6/64754, intron 1 of 11)	SMYD3
control_d65_vs_control_VPA_high_1B	chr1_247376544_247377248	27.4156910498729	1.81753121140451	0.00388451487432401	0.0232143384291636	Distal Intergenic	NLRP3
control_d65_vs_control_VPA_high_1B	chr1_247647264_247648346	42.9526239895931	3.12035954494307	6.26054280044351e-09	2.25762330878656e-07	Intron (ENST00000655877.1/ENST00000655877.1, intron 1 of 1)	OR13G1
control_d65_vs_control_VPA_high_1B	chr10_3500271_3500982	50.0243820730719	1.97880761741203	3.27632047658026e-07	7.95713184362046e-06	Promoter (<=1kb)	LINC02669
control_d65_vs_control_VPA_high_1B	chr10_4646598_4647663	23.723752678136	1.8466582994051	0.000809747306157852	0.00669416376517115	Downstream (2-3kb)	MANCR
control_d65_vs_control_VPA_high_1B	chr10_6279355_6280050	21.7097204697921	2.27049531679632	0.00153693346989521	0.0111936553099898	Promoter (1-2kb)	LINC02649
control_d65_vs_control_VPA_high_1B	chr10_10551174_10552474	25.2329987428	3.20539747394002	4.20680303435429e-06	7.63135278629894e-05	Distal Intergenic	CELF2-DT
control_d65_vs_control_VPA_high_1B	chr10_10870650_10871552	21.5702602405362	2.66393857139401	0.000219787404756114	0.00228523701649526	Intron (ENST00000637215.1/10659, intron 1 of 14)	CELF2
control_d65_vs_control_VPA_high_1B	chr10_11874489_11875684	76.1731079656	1.05280075639194	0.00201300470770563	0.0138493334413214	Promoter (<=1kb)	PROSER2-AS1
control_d65_vs_control_VPA_high_1B	chr10_12513770_12514412	22.8453890273976	3.75136421885203	1.28021184022466e-09	5.29800933156372e-08	Intron (ENST00000619168.4/57118, intron 1 of 10)	MIR4480
control_d65_vs_control_VPA_high_1B	chr10_13536502_13537367	24.4700754052525	1.59543616240059	0.00252832340575395	0.0165689587969173	Distal Intergenic	BEND7
control_d65_vs_control_VPA_high_1B	chr10_13822693_13823532	32.0929368633249	3.34558633022629	8.07110856712574e-07	1.78177542460935e-05	Intron (ENST00000357447.7/55691, intron 3 of 24)	FRMD4A
control_d65_vs_control_VPA_high_1B	chr10_14093871_14094713	25.5270327057932	1.83698766962766	0.000513576307199436	0.00461334636513063	Intron (ENST00000357447.7/55691, intron 2 of 24)	LOC101928453
control_d65_vs_control_VPA_high_1B	chr10_14240140_14241256	21.5538961203331	3.59058885061409	3.3737362024701e-08	1.03736807703916e-06	Intron (ENST00000357447.7/55691, intron 2 of 24)	FRMD4A
control_d65_vs_control_VPA_high_1B	chr10_14424695_14425941	40.4673344890248	1.38427347113746	0.00531666950590454	0.0295768487839495	Intron (ENST00000493380.5/55691, intron 1 of 3)	MIR1265
control_d65_vs_control_VPA_high_1B	chr10_15879487_15880173	30.5192081091733	2.07482859632632	4.33347722161205e-05	0.000578259154039411	Distal Intergenic	MINDY3
control_d65_vs_control_VPA_high_1B	chr10_16867449_16868372	25.9232320996168	2.17818375312364	0.000105769995541205	0.00123498070234622	Promoter (<=1kb)	CUBN
control_d65_vs_control_VPA_high_1B	chr10_17006545_17008073	92.5379877040367	1.00357931472019	0.00114770865198992	0.00885468166856189	Intron (ENST00000377833.9/8029, intron 28 of 66)	CUBN
control_d65_vs_control_VPA_high_1B	chr10_17125209_17126189	29.7324349020865	2.80851928923294	2.04753374105435e-05	0.000302750082438971	Promoter (1-2kb)	CUBN
control_d65_vs_control_VPA_high_1B	chr10_17231110_17231679	35.834187869678	2.14508028114758	3.72369865363995e-06	6.85161927089265e-05	Promoter (<=1kb)	VIM
control_d65_vs_control_VPA_high_1B	chr10_17712704_17713607	24.8796415065613	1.66848558269518	0.00224131670082444	0.0150812428145948	Intron (ENST00000377524.8/8027, intron 13 of 13)	STAM
control_d65_vs_control_VPA_high_1B	chr10_17787185_17788085	24.563253696088	1.48151069628399	0.00575978568264308	0.0314290966456289	Intron (ENST00000377495.2/653567, intron 3 of 3)	MRC1
control_d65_vs_control_VPA_high_1B	chr10_18135792_18136814	36.9592208706613	3.03608997585386	3.27618493315839e-08	1.01020009541437e-06	Distal Intergenic	CACNB2
control_d65_vs_control_VPA_high_1B	chr10_18400278_18401348	26.8308591355551	2.54560121387493	1.39426449999676e-05	0.000217022761783676	Promoter (<=1kb)	CACNB2
control_d65_vs_control_VPA_high_1B	chr10_20995064_20996044	25.3346255235844	1.19267261616501	0.00791215885650879	0.0400978077298877	Intron (ENST00000417816.2/10529, intron 3 of 6)	NEBL
control_d65_vs_control_VPA_high_1B	chr10_21099972_21101361	42.1084477513451	2.04454089936277	4.48431962090299e-06	8.07161335574291e-05	Intron (ENST00000417816.2/10529, intron 2 of 6)	NEBL
control_d65_vs_control_VPA_high_1B	chr10_21145577_21146537	48.0219281284688	2.95880720338394	2.14983527904722e-08	6.92903902242435e-07	5' UTR	NEBL
control_d65_vs_control_VPA_high_1B	chr10_21261691_21262570	36.0307243896954	1.4396084191822	0.00116527129503736	0.00895946972578848	Distal Intergenic	NEBL-AS1
control_d65_vs_control_VPA_high_1B	chr10_21313807_21314988	25.5039631488108	1.69438439533113	0.00590356885723475	0.0320362824939246	Distal Intergenic	LINC02643
control_d65_vs_control_VPA_high_1B	chr10_21509062_21509880	25.271358554737	1.73478297892642	0.00126459113261316	0.00958157293507801	Distal Intergenic	MIR1915HG
control_d65_vs_control_VPA_high_1B	chr10_21719970_21720542	22.0067911355271	3.10603058831692	2.45397067212292e-07	6.14096456948299e-06	Intron (ENST00000631589.1/8028, intron 14 of 22)	MLLT10
control_d65_vs_control_VPA_high_1B	chr10_21726575_21727276	26.3401926338484	3.07898121474211	1.83131516268235e-06	3.686784007474e-05	Intron (ENST00000631589.1/8028, intron 15 of 22)	MLLT10
control_d65_vs_control_VPA_high_1B	chr10_21806925_21807901	48.6914400253681	2.50161354699155	1.89940397452407e-08	6.20785528054784e-07	Intron (ENST00000376980.8/64215, intron 8 of 11)	DNAJC1
control_d65_vs_control_VPA_high_1B	chr10_22560186_22561399	55.703049045411	1.69014062276325	4.50287568662911e-06	8.09989403200475e-05	Intron (ENST00000376573.9/5305, intron 6 of 9)	PIP4K2A
control_d65_vs_control_VPA_high_1B	chr10_23292957_23293660	20.11809175443	2.097771904239	0.000434898158780271	0.00402466033889847	Intron (ENST00000636213.2/256815, intron 5 of 15)	LOC105376453
control_d65_vs_control_VPA_high_1B	chr10_24790396_24791480	53.9128156471322	1.06914818387046	0.00367328173928102	0.0222236740767631	Distal Intergenic	ARHGAP21
control_d65_vs_control_VPA_high_1B	chr10_24857084_24857926	22.511239923426	2.9156622787029	2.15793838032013e-06	4.26043759892342e-05	Intron (ENST00000320152.11/56952, intron 5 of 8)	LINC01516
control_d65_vs_control_VPA_high_1B	chr10_24871652_24872719	39.90584517789	1.58602243118085	0.000273809867911639	0.00274511422731325	Exon (ENST00000320152.11/56952, exon 4 of 9)	LINC01516
control_d65_vs_control_VPA_high_1B	chr10_24957781_24959301	30.3107079369987	1.17964265586253	0.00597379194589458	0.0323196962830783	Intron (ENST00000648191.1/101929025, intron 1 of 4)	PRTFDC1
control_d65_vs_control_VPA_high_1B	chr10_25547128_25547857	23.9021904691215	3.50554443647864	1.42862107960589e-07	3.7775553486552e-06	Intron (ENST00000650135.1/57512, intron 6 of 11)	GPR158
control_d65_vs_control_VPA_high_1B	chr10_25766234_25767277	42.0813312568794	2.20286559802243	0.000368936885660953	0.00351357215789071	Distal Intergenic	LINC00836
control_d65_vs_control_VPA_high_1B	chr10_25816206_25816954	21.6899005193077	4.61569439407699	1.70142316913038e-09	6.84366228961794e-08	Distal Intergenic	LINC00836
control_d65_vs_control_VPA_high_1B	chr10_25895747_25896935	21.2208571966124	3.4825363649324	1.86949669696008e-06	3.7547577688597e-05	Distal Intergenic	LOC101929073
control_d65_vs_control_VPA_high_1B	chr10_26215811_26216739	36.9525913359882	1.5282596456509	0.00412349810255144	0.0243304085467284	Promoter (<=1kb)	GAD2
control_d65_vs_control_VPA_high_1B	chr10_26291837_26292627	36.1595475650296	3.70628337011056	7.16141437634641e-08	2.03535687235123e-06	Exon (ENST00000259271.7/2572, exon 14 of 17)	GAD2
control_d65_vs_control_VPA_high_1B	chr10_27701813_27702628	28.7569833408323	1.49497447269445	0.00610696362548349	0.0328609272244887	Intron (ENST00000419761.6/283078, intron 5 of 6)	MKX
control_d65_vs_control_VPA_high_1B	chr10_28761185_28762278	43.7180358651323	3.13663280840746	1.5135930758302e-06	3.11342446351112e-05	Exon (ENST00000659813.1/ENST00000659813.1, exon 3 of 3)	LINC01517
control_d65_vs_control_VPA_high_1B	chr10_28897427_28898442	65.589169062479	2.68424538835066	1.66557040929633e-13	1.43052476868413e-11	Intron (ENST00000646289.1/101929218, intron 2 of 7)	C10orf126
control_d65_vs_control_VPA_high_1B	chr10_29728332_29729135	31.1364657662306	1.6003688906302	0.00420989784302005	0.0247238479676725	Intron (ENST00000375400.7/6840, intron 1 of 35)	SVIL
control_d65_vs_control_VPA_high_1B	chr10_30834168_30835356	24.156085546564	1.82369522682446	0.000529119628265813	0.00472761783049961	3' UTR	ZNF438
control_d65_vs_control_VPA_high_1B	chr10_31773940_31774955	28.9497598444794	1.88019853939587	0.000227629863448746	0.00235102340599211	Distal Intergenic	ARHGAP12
control_d65_vs_control_VPA_high_1B	chr10_31803686_31804831	22.9000706595731	2.66693255930753	1.94238619061639e-06	3.88566901710602e-05	Downstream (<1kb)	ARHGAP12
control_d65_vs_control_VPA_high_1B	chr10_33381545_33382361	25.2241873247135	3.70697351712577	7.27247473982903e-09	2.58749964839378e-07	Distal Intergenic	NRP1
control_d65_vs_control_VPA_high_1B	chr10_33772254_33773424	57.8350998507292	1.94625565716956	1.43409316854407e-05	0.000222371450510723	Promoter (<=1kb)	LINC00838
control_d65_vs_control_VPA_high_1B	chr10_35464785_35465454	39.3426411809925	2.84003517922092	5.8212007866289e-10	2.59083074796009e-08	Intron (ENST00000490012.6/219771, intron 7 of 9)	CCNY
control_d65_vs_control_VPA_high_1B	chr10_35637119_35638141	51.6769314864304	1.45877126015056	0.00160994818266562	0.0116310923213011	Downstream (<1kb)	MIR4683
control_d65_vs_control_VPA_high_1B	chr10_44233322_44234969	62.1139527592865	1.28391294123374	0.00011285945217693	0.00130522018643977	Distal Intergenic	C10orf142
control_d65_vs_control_VPA_high_1B	chr10_44300751_44302497	22.2598122583215	1.44546316008051	0.00511686608245121	0.0287096959124186	Exon (ENST00000658643.1/ENST00000658643.1, exon 2 of 3)	C10orf142
control_d65_vs_control_VPA_high_1B	chr10_44370455_44371407	25.0515113663991	1.36185418371592	0.00887775304128765	0.0437405970778183	3' UTR	CXCL12
control_d65_vs_control_VPA_high_1B	chr10_44963883_44964737	46.4036262770822	1.11018948707924	0.00489934668176153	0.0277627324148621	Intron (ENST00000489171.5/83937, intron 1 of 9)	RASSF4
control_d65_vs_control_VPA_high_1B	chr10_47377153_47378062	23.9798129482634	3.30669902620853	0.000498870309082768	0.00450622142527588	Intron (ENST00000585316.3/118738, intron 1 of 1)	ZNF488
control_d65_vs_control_VPA_high_1B	chr10_48398498_48400054	27.7882776311052	2.14008206389726	4.05310002055111e-06	7.38748538627395e-05	Promoter (1-2kb)	MAPK8
control_d65_vs_control_VPA_high_1B	chr10_48604706_48605700	20.1324967841536	2.38029885033776	0.000400713472491784	0.00376015006059815	Promoter (<=1kb)	ARHGAP22
control_d65_vs_control_VPA_high_1B	chr10_48655984_48657052	41.692099040933	1.43867070812072	0.00137058082963936	0.0102161904939214	Promoter (<=1kb)	ARHGAP22
control_d65_vs_control_VPA_high_1B	chr10_49082746_49083686	22.3882874810979	1.5642784870086	0.00766721959063239	0.039148341696486	Intron (ENST00000332853.9/196740, intron 3 of 7)	VSTM4
control_d65_vs_control_VPA_high_1B	chr10_49609241_49610645	54.2164988809286	2.03598708892588	5.00378177008402e-07	1.16270413887303e-05	Promoter (<=1kb)	SLC18A3
control_d65_vs_control_VPA_high_1B	chr10_49679287_49679998	29.367630245454	3.91127502145507	5.27884393368365e-07	1.21922885274487e-05	Promoter (<=1kb)	C10orf53
control_d65_vs_control_VPA_high_1B	chr10_51377612_51378875	20.3840858976812	1.96313245856538	0.000633376233693904	0.0054706278990475	Intron (ENST00000401604.8/5592, intron 2 of 17)	MIR605
control_d65_vs_control_VPA_high_1B	chr10_51564634_51565577	39.9408947156778	2.6189061420538	6.46507130497315e-06	0.000111073524464464	Intron (ENST00000401604.8/5592, intron 3 of 17)	PRKG1
control_d65_vs_control_VPA_high_1B	chr10_52516557_52517570	27.9013899792994	1.43066034848021	0.0088526325757015	0.0436459548743796	Intron (ENST00000647908.1/101928687, intron 4 of 6)	LNCAROD
control_d65_vs_control_VPA_high_1B	chr10_54800681_54801643	28.6260337361917	1.41105284031041	0.00110673350712915	0.0086009472422973	Promoter (<=1kb)	PCDH15
control_d65_vs_control_VPA_high_1B	chr10_55369795_55370961	27.4471222478448	2.74846149395761	1.00032217648732e-06	2.15462155152935e-05	Intron (ENST00000613346.4/65217, intron 2 of 5)	PCDH15
control_d65_vs_control_VPA_high_1B	chr10_55410289_55411188	47.0337844839154	1.82755574112537	7.53714232947058e-06	0.000127007538022878	Intron (ENST00000613346.4/65217, intron 2 of 5)	PCDH15
control_d65_vs_control_VPA_high_1B	chr10_57222099_57223070	24.8761618358951	1.87456039830391	0.00823573124472947	0.0413260523249135	Distal Intergenic	MIR3924
control_d65_vs_control_VPA_high_1B	chr10_58796003_58796717	25.8421703267559	3.76268508411581	1.45450968586394e-09	5.93917836620715e-08	Promoter (2-3kb)	BICC1
control_d65_vs_control_VPA_high_1B	chr10_58967464_58968585	60.7036819553234	1.56056470635711	3.67268402907441e-06	6.7733820932544e-05	Distal Intergenic	LINC00844
control_d65_vs_control_VPA_high_1B	chr10_58981549_58982493	31.6881436283802	2.5328598165055	9.74904763369049e-07	2.10601825919556e-05	Distal Intergenic	LINC00844
control_d65_vs_control_VPA_high_1B	chr10_59090563_59091868	50.660568869619	2.44119058924477	1.14279804093051e-07	3.0961160405998e-06	Distal Intergenic	PHYHIPL
control_d65_vs_control_VPA_high_1B	chr10_59133650_59134777	21.9218951839242	3.10417792158788	1.06543497581785e-07	2.91098712047369e-06	Distal Intergenic	PHYHIPL
control_d65_vs_control_VPA_high_1B	chr10_59318594_59319742	28.0446651703811	3.38243734398816	6.68819964846937e-07	1.5035443199955e-05	Intron (ENST00000618427.4/220965, intron 5 of 14)	FAM13C
control_d65_vs_control_VPA_high_1B	chr10_59342769_59343771	27.3738879297018	3.73041080730725	3.62682119393648e-08	1.10566187142753e-06	Intron (ENST00000618427.4/220965, intron 4 of 14)	FAM13C
control_d65_vs_control_VPA_high_1B	chr10_59625717_59626780	40.191287800322	1.17757030812898	0.00242521728165092	0.0160483772357837	Intron (ENST00000644636.1/ENST00000644636.1, intron 3 of 6)	SLC16A9
control_d65_vs_control_VPA_high_1B	chr10_59846980_59848171	37.8901502203721	2.5531872826664	4.30639143911618e-05	0.000574999430276028	Intron (ENST00000263102.7/8030, intron 2 of 8)	CCDC6
control_d65_vs_control_VPA_high_1B	chr10_60257375_60258900	43.5645861577427	2.87965710667196	1.33216247800822e-09	5.49720194639782e-08	Intron (ENST00000280772.7/288, intron 7 of 43)	ANK3
control_d65_vs_control_VPA_high_1B	chr10_60350443_60351579	24.012556837093	1.86967515534736	0.00179316554020147	0.0126660186300405	Intron (ENST00000280772.7/288, intron 1 of 43)	ANK3
control_d65_vs_control_VPA_high_1B	chr10_60390132_60390829	25.7214521509634	3.01389945205233	4.30726044997893e-09	1.60823214396235e-07	Promoter (<=1kb)	ANK3
control_d65_vs_control_VPA_high_1B	chr10_60603785_60604888	22.6251012481001	1.94881192484428	0.000430392694286305	0.00398889125645999	Intron (ENST00000373827.6/288, intron 2 of 43)	ANK3
control_d65_vs_control_VPA_high_1B	chr10_61621469_61622191	20.3981687829006	1.71300042123399	0.00237780115109577	0.0158002866558997	Distal Intergenic	CABCOCO1
control_d65_vs_control_VPA_high_1B	chr10_61899873_61900814	25.8755092801834	1.32430418229963	0.00409263755563337	0.0241790921156212	Promoter (<=1kb)	ARID5B
control_d65_vs_control_VPA_high_1B	chr10_62050572_62051475	47.4416996285386	2.15525580341858	4.6174205278611e-08	1.37177989947392e-06	Promoter (1-2kb)	ARID5B
control_d65_vs_control_VPA_high_1B	chr10_62081437_62082613	20.7034472278537	1.42518218963229	0.00704162346527188	0.0366563254128148	Intron (ENST00000279873.12/84159, intron 8 of 9)	ARID5B
control_d65_vs_control_VPA_high_1B	chr10_62796596_62797556	24.8930300019462	3.46700109217896	1.23464449669443e-07	3.31521338682715e-06	Intron (ENST00000649548.1/ENST00000649548.1, intron 1 of 3)	ADO
control_d65_vs_control_VPA_high_1B	chr10_67098261_67099136	20.7631943779026	3.09686881167579	3.3761759942048e-05	0.000465956230781466	3' UTR	CTNNA3
control_d65_vs_control_VPA_high_1B	chr10_67386508_67387857	40.5503976415189	1.88060704423514	4.73150429913513e-05	0.000623731289522148	Intron (ENST00000433211.7/29119, intron 5 of 17)	MIR7151
control_d65_vs_control_VPA_high_1B	chr10_67609490_67610729	20.272853912715	3.13790425634631	0.000103944511246411	0.0012167306247168	Intron (ENST00000433211.7/29119, intron 2 of 17)	CTNNA3
control_d65_vs_control_VPA_high_1B	chr10_67837851_67838480	22.5157599473203	1.37356240322355	0.00464844459501072	0.026670758583842	Promoter (<=1kb)	DNAJC12
control_d65_vs_control_VPA_high_1B	chr10_67861442_67862650	21.0823041223391	2.75672463994128	0.00080409060718884	0.00665499651999778	Distal Intergenic	SIRT1
control_d65_vs_control_VPA_high_1B	chr10_68328275_68328871	26.1052096721912	1.94193169736329	0.000199362551341836	0.00210777656641685	Promoter (2-3kb)	HNRNPH3
control_d65_vs_control_VPA_high_1B	chr10_69543392_69544254	33.0044053992113	2.10267652814333	0.000951244777819533	0.00761828940095667	Exon (ENST00000654329.1/ENST00000654329.1, exon 3 of 3)	NEUROG3
control_d65_vs_control_VPA_high_1B	chr10_69574433_69575211	30.1309940199417	2.04134956883459	0.00315299402402874	0.0197175627165051	Promoter (1-2kb)	NEUROG3
control_d65_vs_control_VPA_high_1B	chr10_69646164_69646935	33.6967580958139	2.60314736346924	1.37725769214828e-06	2.86617404634086e-05	Distal Intergenic	FAM241B
control_d65_vs_control_VPA_high_1B	chr10_71514359_71515174	27.0586117386306	1.58053686477997	0.00395249783229283	0.0235352958025045	Promoter (2-3kb)	CDH23
control_d65_vs_control_VPA_high_1B	chr10_71528231_71529180	37.3054176335891	2.25785867811747	1.84531608472935e-06	3.71159701570434e-05	Intron (ENST00000224721.12/64072, intron 6 of 69)	CDH23
control_d65_vs_control_VPA_high_1B	chr10_71608688_71609602	23.8076015397876	1.49236312484702	0.00454220614454052	0.02622348246661	Intron (ENST00000224721.12/64072, intron 9 of 69)	CDH23
control_d65_vs_control_VPA_high_1B	chr10_71839917_71840873	48.3227770295116	1.53369291385825	3.8454694416078e-05	0.000521446807228588	Intron (ENST00000394936.8/5660, intron 1 of 13)	PSAP
control_d65_vs_control_VPA_high_1B	chr10_72069788_72070681	21.8956455512645	1.85185754781158	0.000742962328464458	0.00624421638054201	Promoter (<=1kb)	SPOCK2
control_d65_vs_control_VPA_high_1B	chr10_72087500_72089230	40.9245624608368	1.61530550972819	0.000713169681270398	0.00603786304606	Promoter (<=1kb)	SPOCK2
control_d65_vs_control_VPA_high_1B	chr10_72157867_72159015	22.6685491189955	2.40293357218585	0.000577767326054149	0.00508097782687446	Promoter (<=1kb)	ASCC1
control_d65_vs_control_VPA_high_1B	chr10_73552858_73553751	51.5259852299035	1.93028316416568	2.51197068903973e-05	0.000361396729920117	Promoter (<=1kb)	USP54
control_d65_vs_control_VPA_high_1B	chr10_74034422_74035762	29.4923734180143	1.11255253187313	0.00910481419422311	0.0445741022887454	Intron (ENST00000623461.3/7414, intron 3 of 22)	VCL
control_d65_vs_control_VPA_high_1B	chr10_74588990_74589827	66.4941024265517	1.37908829688863	4.40823940335046e-06	7.95334040438909e-05	3' UTR	LOC102723439
control_d65_vs_control_VPA_high_1B	chr10_76230605_76231889	46.0071183963511	3.08771620041215	3.61830252629964e-10	1.68055483552593e-08	Intron (ENST00000611255.5/83938, intron 5 of 6)	LRMDA
control_d65_vs_control_VPA_high_1B	chr10_77983421_77984652	21.4308081733555	1.41332918163128	0.00400054531372269	0.023756112782525	Promoter (<=1kb)	POLR3A
control_d65_vs_control_VPA_high_1B	chr10_78176480_78178324	85.7216846663633	3.28299112058297	4.38936808835021e-23	1.69246222619006e-20	Exon (ENST00000634547.1/ENST00000634547.1, exon 1 of 1)	LINC00856
control_d65_vs_control_VPA_high_1B	chr10_78356962_78358129	23.2013591054375	2.03316812160601	0.000109882707005205	0.00127597589040948	Intron (ENST00000634930.1/ENST00000634930.1, intron 1 of 3)	LINC00595
control_d65_vs_control_VPA_high_1B	chr10_78913319_78914485	79.9247706749299	3.00307991067474	1.10962657395744e-11	6.8377007422603e-10	Distal Intergenic	ZMIZ1-AS1
control_d65_vs_control_VPA_high_1B	chr10_79024877_79025987	21.7896315651898	1.44303869407428	0.00313433731311475	0.019627983728212	Intron (ENST00000456353.5/283050, intron 5 of 9)	ZMIZ1-AS1
control_d65_vs_control_VPA_high_1B	chr10_79179481_79180035	34.1175361762097	1.12120130942464	0.00807473461771616	0.040723203053691	Intron (ENST00000334512.10/57178, intron 4 of 24)	ZMIZ1
control_d65_vs_control_VPA_high_1B	chr10_79220757_79221790	87.2201546486463	1.76183609498543	2.68294991531437e-10	1.27523923180319e-08	Intron (ENST00000334512.10/57178, intron 7 of 24)	ZMIZ1
control_d65_vs_control_VPA_high_1B	chr10_79239354_79240685	74.7337092770895	1.12005101696102	0.000855628847315132	0.00699106222569947	Promoter (2-3kb)	ZMIZ1
control_d65_vs_control_VPA_high_1B	chr10_81874109_81875565	98.0743037011298	1.55031655465183	1.01156280105366e-06	2.17554210960021e-05	Promoter (<=1kb)	NRG3
control_d65_vs_control_VPA_high_1B	chr10_81876263_81876941	20.735800932915	1.77896644172205	0.00424172432106688	0.0248711917320842	Promoter (<=1kb)	NRG3
control_d65_vs_control_VPA_high_1B	chr10_85419914_85421295	22.603072129602	1.89142941246468	0.00167342673933452	0.0119858769322858	Exon (ENST00000669767.1/101929646, exon 2 of 2)	LINC02647
control_d65_vs_control_VPA_high_1B	chr10_86244103_86245370	31.6593290276975	2.46221809230974	1.95825354005189e-07	5.01473845773368e-06	Intron (ENST00000327946.12/2894, intron 2 of 15)	MIR346
control_d65_vs_control_VPA_high_1B	chr10_89342453_89343173	31.9585293649934	2.16196004308363	1.19592173882575e-07	3.22295815800942e-06	Promoter (<=1kb)	LIPA
control_d65_vs_control_VPA_high_1B	chr10_89367346_89368002	21.6718258783419	1.76260111698855	0.00254423451443224	0.0166535207195537	Intron (ENST00000371837.5/3988, intron 2 of 8)	IFIT1B
control_d65_vs_control_VPA_high_1B	chr10_91049865_91050874	38.5993158327526	1.67339254933755	0.000916294480246552	0.00738824735910808	Intron (ENST00000423621.2/100874184, intron 7 of 7)	LINC00502
control_d65_vs_control_VPA_high_1B	chr10_91313566_91314581	33.1558598290111	1.37922596834067	0.000646641331568156	0.00556490083244628	Distal Intergenic	PCGF5
control_d65_vs_control_VPA_high_1B	chr10_91381120_91382184	32.244724312298	2.32378118310523	7.35244942650955e-07	1.63781582677056e-05	Distal Intergenic	HECTD2
control_d65_vs_control_VPA_high_1B	chr10_91912718_91913246	20.2711709154705	2.33357544886915	0.000229307644360142	0.00236663534416861	Distal Intergenic	FGFBP3
control_d65_vs_control_VPA_high_1B	chr10_92243157_92243664	28.2406708819508	1.56256155477053	0.000607148617680694	0.0052866536358948	Promoter (<=1kb)	CPEB3
control_d65_vs_control_VPA_high_1B	chr10_92894029_92894982	25.5887271713257	5.0852447754127	1.08573460988251e-07	2.96123753648431e-06	Exon (ENST00000671701.1/54536, exon 4 of 23)	EXOC6
control_d65_vs_control_VPA_high_1B	chr10_92993678_92994518	38.6138014027329	1.60312257405035	0.00398321025055298	0.0236778598660127	Promoter (2-3kb)	EXOC6
control_d65_vs_control_VPA_high_1B	chr10_93068323_93068925	21.8325844969268	1.88755997979569	0.00411321575480477	0.0242812374620899	3' UTR	CYP26A1
control_d65_vs_control_VPA_high_1B	chr10_95404202_95404991	36.0990472501131	2.05901712841343	8.05528073120347e-07	1.7784782286438e-05	Intron (ENST00000371227.8/10580, intron 11 of 31)	SORBS1
control_d65_vs_control_VPA_high_1B	chr10_95476282_95477582	30.9026331598141	1.16333746736543	0.0090471611790433	0.0443636482522216	Intron (ENST00000371227.8/10580, intron 2 of 31)	SORBS1
control_d65_vs_control_VPA_high_1B	chr10_95755431_95756823	24.6016182588141	1.92438502234817	0.0022337844047686	0.0150376869496488	Promoter (<=1kb)	ENTPD1
control_d65_vs_control_VPA_high_1B	chr10_96450378_96451528	43.908922887624	1.64116089025113	0.000155016623322613	0.0017064412056364	Intron (ENST00000357947.4/7093, intron 2 of 20)	TLL2
control_d65_vs_control_VPA_high_1B	chr10_97058524_97060045	20.3848487912337	1.30366106197662	0.0105249165459241	0.0497545593626545	Exon (ENST00000266058.9/6585, exon 11 of 37)	SLIT1
control_d65_vs_control_VPA_high_1B	chr10_97096250_97097508	31.7291094386977	1.87520858109007	9.48521160286244e-05	0.00112677372753961	Intron (ENST00000266058.9/6585, intron 4 of 36)	SLIT1
control_d65_vs_control_VPA_high_1B	chr10_97128130_97128911	23.8590573228243	1.3578623071641	0.00486365876143589	0.0276036590211024	Intron (ENST00000266058.9/6585, intron 4 of 36)	SLIT1-AS1
control_d65_vs_control_VPA_high_1B	chr10_97134009_97134681	22.4551588176573	2.19370436968304	0.000396810301615372	0.003729141353282	Intron (ENST00000266058.9/6585, intron 4 of 36)	SLIT1-AS1
control_d65_vs_control_VPA_high_1B	chr10_97179531_97180708	35.5837852035944	1.45492811607033	0.00111417314724249	0.0086503333934492	Intron (ENST00000266058.9/6585, intron 1 of 36)	SLIT1
control_d65_vs_control_VPA_high_1B	chr10_97185073_97186406	50.8172414773844	1.56329569557878	6.67896151993852e-05	0.000836374309412441	Promoter (<=1kb)	SLIT1
control_d65_vs_control_VPA_high_1B	chr10_97336945_97338262	38.5892303821919	2.02096580115844	4.57453898127064e-05	0.000606165945068052	Promoter (2-3kb)	FRAT2
control_d65_vs_control_VPA_high_1B	chr10_98326395_98327237	27.5533619423659	2.79286974199374	3.07676725213766e-08	9.53577805728597e-07	Distal Intergenic	LOXL4
control_d65_vs_control_VPA_high_1B	chr10_99536725_99537887	57.159798437743	1.40876434774994	0.000869709638304787	0.00708476877628264	Distal Intergenic	NKX2-3
control_d65_vs_control_VPA_high_1B	chr10_99913607_99914625	58.5152568878391	2.0323410501874	5.37742713642494e-06	9.47303455229557e-05	Promoter (<=1kb)	DNMBP
control_d65_vs_control_VPA_high_1B	chr10_100873479_100874344	33.0804934500695	1.52582892567764	0.00688447722132351	0.0360482518494906	Distal Intergenic	SLF2
control_d65_vs_control_VPA_high_1B	chr10_101464443_101465196	33.019633738403	2.15430383234694	0.00829595529775618	0.0415560735949971	Intron (ENST00000393441.8/8945, intron 2 of 13)	BTRC
control_d65_vs_control_VPA_high_1B	chr10_101629797_101630809	20.8008997238479	2.66731840557453	0.000301980243293393	0.00297732595971931	Promoter (2-3kb)	FBXW4
control_d65_vs_control_VPA_high_1B	chr10_101748908_101749987	42.5264053958786	1.40852058779036	0.00475867456245441	0.0271562675863688	Distal Intergenic	FGF8
control_d65_vs_control_VPA_high_1B	chr10_101843362_101844151	30.8977699299403	2.4220508345873	0.000114312407863998	0.00131972671906275	Promoter (<=1kb)	KCNIP2
control_d65_vs_control_VPA_high_1B	chr10_102412921_102413662	33.8267504228033	1.54504164533669	0.00146507683033728	0.0107714540761383	Promoter (1-2kb)	PSD
control_d65_vs_control_VPA_high_1B	chr10_103204405_103205489	24.2354159429802	1.96444035699388	0.0005413572767129	0.00481860187906812	Distal Intergenic	NT5C2
control_d65_vs_control_VPA_high_1B	chr10_103276650_103277871	51.1361411685836	1.58346733017242	6.2470589961047e-05	0.000790231754957477	Promoter (<=1kb)	INA
control_d65_vs_control_VPA_high_1B	chr10_103281683_103282227	30.2765208257073	3.05206232707575	8.90009045179191e-09	3.10554425206181e-07	Intron (ENST00000369849.9/9118, intron 1 of 2)	INA
control_d65_vs_control_VPA_high_1B	chr10_104076635_104077767	30.9266023822973	1.45876249428404	0.00444063034535533	0.0257571548191691	Promoter (2-3kb)	COL17A1
control_d65_vs_control_VPA_high_1B	chr10_105843476_105845340	61.1622023799413	2.25155512819159	2.34954609943253e-11	1.36751128974446e-09	Exon (ENST00000660648.1/ENST00000660648.1, exon 1 of 2)	LINC02627
control_d65_vs_control_VPA_high_1B	chr10_106912931_106914064	53.4007277711081	3.38352917180682	2.54155431945016e-09	9.89192512876252e-08	Intron (ENST00000263054.10/114815, intron 2 of 25)	SORCS1
control_d65_vs_control_VPA_high_1B	chr10_107085564_107086371	25.6893658171925	2.69034519233868	0.000108666014029754	0.0012646468114178	Intron (ENST00000263054.10/114815, intron 1 of 25)	SORCS1
control_d65_vs_control_VPA_high_1B	chr10_107103176_107104074	26.5980051236956	2.62486256423725	5.99245917354345e-06	0.000104002504475813	Intron (ENST00000263054.10/114815, intron 1 of 25)	SORCS1
control_d65_vs_control_VPA_high_1B	chr10_110353373_110354780	25.6655537611106	1.49966159312922	0.000960697776133689	0.00767949550409601	Distal Intergenic	SMNDC1
control_d65_vs_control_VPA_high_1B	chr10_110794544_110795655	52.681506960922	1.30723539301778	0.00022882044391604	0.00236197391326051	Intron (ENST00000369519.4/282996, intron 5 of 13)	RBM20
control_d65_vs_control_VPA_high_1B	chr10_112288330_112289072	33.6618337220788	3.76398786215094	4.73253015999572e-08	1.40200766425101e-06	Intron (ENST00000643850.1/6975, intron 5 of 10)	TECTB
control_d65_vs_control_VPA_high_1B	chr10_112583252_112584025	28.7256241474066	1.34772680647035	0.00878393460058602	0.0433866603951639	Intron (ENST00000432306.5/143187, intron 5 of 7)	MIR4295
control_d65_vs_control_VPA_high_1B	chr10_112658536_112659756	26.6782491673012	1.30331957603646	0.00490897755537884	0.027803870887446	Intron (ENST00000432306.5/143187, intron 5 of 7)	MIR4295
control_d65_vs_control_VPA_high_1B	chr10_112732047_112733097	49.0202429742605	2.57648873351743	5.18888999399657e-10	2.3349536450186e-08	Intron (ENST00000432306.5/143187, intron 7 of 7)	LOC103344931
control_d65_vs_control_VPA_high_1B	chr10_113620189_113621284	33.9565834316046	3.99156872233247	6.83737280703039e-08	1.95216688569218e-06	Exon (ENST00000369360.7/4892, exon 24 of 41)	NRAP
control_d65_vs_control_VPA_high_1B	chr10_114303922_114305363	58.0995360331604	1.25249647932675	0.000300255971930954	0.00296325694245002	Promoter (<=1kb)	AFAP1L2
control_d65_vs_control_VPA_high_1B	chr10_114678044_114679372	31.1319911269584	1.62973598077991	0.00160196838009658	0.0115839374890718	Intron (ENST00000392955.7/3983, intron 1 of 22)	ABLIM1
control_d65_vs_control_VPA_high_1B	chr10_116254266_116255295	31.0538443522759	1.84901965369148	0.000858158567694896	0.00700821293878356	Intron (ENST00000369236.5/2674, intron 3 of 8)	GFRA1
control_d65_vs_control_VPA_high_1B	chr10_116835945_116836672	31.7381927469107	2.03077338687872	0.000477384652414145	0.00434867025599896	Intron (ENST00000635765.1/259217, intron 1 of 12)	ENO4
control_d65_vs_control_VPA_high_1B	chr10_116961313_116962432	43.1558045746864	3.91154591079993	1.1477068411571e-18	2.26750017797129e-16	Promoter (<=1kb)	SHTN1
control_d65_vs_control_VPA_high_1B	chr10_117094763_117095542	49.6969556526713	2.33166235564351	1.62018338814064e-05	0.000246905494757499	Intron (ENST00000392901.10/57698, intron 1 of 17)	SHTN1
control_d65_vs_control_VPA_high_1B	chr10_118017819_118018456	25.0926679262127	2.57227516058878	0.000319590703720989	0.00312044943861171	Promoter (2-3kb)	RAB11FIP2
control_d65_vs_control_VPA_high_1B	chr10_118108194_118109220	40.0370126886802	1.25680174738088	0.00282415018667893	0.0180997874520285	Intron (ENST00000414722.5/255082, intron 3 of 3)	CASC2
control_d65_vs_control_VPA_high_1B	chr10_119335662_119336911	39.8509669962021	1.24089664918146	0.00252571282043071	0.0165572250368254	Exon (ENST00000625697.2/ENST00000625697.2, exon 1 of 3)	MIR4681
control_d65_vs_control_VPA_high_1B	chr10_120948859_120950625	37.2225703708215	1.38343570246775	0.00407533685194381	0.0240997359859861	Intron (ENST00000414774.1/ENST00000414774.1, intron 1 of 1)	WDR11
control_d65_vs_control_VPA_high_1B	chr10_121525836_121526761	29.3738288471601	1.52350335641021	0.00149487623120441	0.0109517676290215	5' UTR	FGFR2
control_d65_vs_control_VPA_high_1B	chr10_121553210_121554156	26.5178394038833	1.57187181480902	0.00331250519276915	0.0204913781274712	Intron (ENST00000369061.8/2263, intron 3 of 14)	FGFR2
control_d65_vs_control_VPA_high_1B	chr10_121600490_121601400	44.2996664217859	1.76684531306501	0.00133261822953057	0.00999669276676457	Promoter (2-3kb)	FGFR2
control_d65_vs_control_VPA_high_1B	chr10_121708686_121709732	47.8626765033352	1.67052087718929	5.85729387480764e-05	0.000748767541854177	Distal Intergenic	ATE1
control_d65_vs_control_VPA_high_1B	chr10_121732367_121733635	26.1391884077569	1.29815316781656	0.00903575714826188	0.0443143933450271	Distal Intergenic	ATE1
control_d65_vs_control_VPA_high_1B	chr10_121921352_121922077	30.1592680809451	1.44404743270245	0.00312722925324745	0.0195939352124047	Intron (ENST00000224652.10/11101, intron 3 of 11)	ATE1
control_d65_vs_control_VPA_high_1B	chr10_122162779_122164648	160.330559896793	1.05279863182389	2.72830771423596e-06	5.22005211250678e-05	Promoter (<=1kb)	TACC2
control_d65_vs_control_VPA_high_1B	chr10_123068862_123070028	29.6624795545736	2.38527406770167	1.99876111040911e-05	0.000296528266961088	Distal Intergenic	ACADSB
control_d65_vs_control_VPA_high_1B	chr10_124075058_124076144	58.0837465052951	1.23153730627552	0.00161467858393625	0.0116593515048124	Intron (ENST00000346248.7/51363, intron 1 of 7)	CHST15
control_d65_vs_control_VPA_high_1B	chr10_124552289_124553403	23.8480842690276	2.08882873699814	6.37812233131039e-05	0.000804106485110929	Intron (ENST00000368842.10/64077, intron 6 of 6)	LHPP
control_d65_vs_control_VPA_high_1B	chr10_124643010_124643932	46.7533087394728	1.73914355444682	8.25586664470547e-05	0.00100203819411185	Intron (ENST00000494792.1/9679, intron 9 of 9)	LHPP
control_d65_vs_control_VPA_high_1B	chr10_126177356_126178313	24.6325623931585	1.92438632596373	0.00898638399004883	0.0441361429520601	Intron (ENST00000368679.8/8038, intron 3 of 22)	ADAM12
control_d65_vs_control_VPA_high_1B	chr10_129895828_129897007	25.5693442415076	2.49632639971843	1.53644594966215e-05	0.00023598455526724	Intron (ENST00000368648.7/253738, intron 6 of 15)	MIR4297
control_d65_vs_control_VPA_high_1B	chr10_131002047_131003285	24.0841217322259	1.91637985930877	0.000339104978792295	0.00327563217048644	Distal Intergenic	MIR378C
control_d65_vs_control_VPA_high_1B	chr10_132158903_132159775	22.8934505220565	3.59851476088333	6.94608765603801e-10	3.04658919665688e-08	Promoter (2-3kb)	JAKMIP3
control_d65_vs_control_VPA_high_1B	chr10_132175632_132176765	24.819498740205	2.47018624534613	4.61788842161286e-06	8.27914007819802e-05	Intron (ENST00000668452.1/282973, intron 23 of 23)	DPYSL4
control_d65_vs_control_VPA_high_1B	chr10_133087605_133088940	46.3799910722798	2.4275110464743	1.12962016732611e-06	2.40146381439469e-05	Promoter (<=1kb)	ADGRA1-AS1
control_d65_vs_control_VPA_high_1B	chr10_133100831_133101722	38.7673432870947	2.34085441115466	2.04987737985229e-05	0.000303074134958121	Promoter (<=1kb)	ADGRA1
control_d65_vs_control_VPA_high_1B	chr10_133151392_133152553	33.4835212972175	1.64828095893973	0.00109376220592786	0.00852007036469444	Distal Intergenic	KNDC1
control_d65_vs_control_VPA_high_1B	chr11_2190475_2191452	34.3720446797957	1.66499551956915	0.000243584442845736	0.00248885619392753	Distal Intergenic	MIR4686
control_d65_vs_control_VPA_high_1B	chr11_5689446_5690562	28.7922979365426	1.42382066722683	0.00297186286132029	0.0188451272200369	Promoter (<=1kb)	TRIM22
control_d65_vs_control_VPA_high_1B	chr11_6404603_6405899	68.923098175522	2.52082530283693	2.60983964462646e-12	1.79533319771222e-10	Promoter (<=1kb)	APBB1
control_d65_vs_control_VPA_high_1B	chr11_6596073_6597366	28.1495371431257	2.19745615990323	7.97074262589609e-06	0.000133299971434722	3' UTR	RRP8
control_d65_vs_control_VPA_high_1B	chr11_7251381_7253034	126.733680608043	1.15681322298168	5.55049381012351e-06	9.72634264304572e-05	Promoter (<=1kb)	SYT9
control_d65_vs_control_VPA_high_1B	chr11_8018293_8020190	70.9443627291595	1.63008782651042	2.39424067793973e-07	6.0088417749537e-06	Promoter (<=1kb)	TUB
control_d65_vs_control_VPA_high_1B	chr11_8038300_8038915	29.4757695975159	2.15747259743518	0.00022148985362053	0.00229892306361753	Promoter (<=1kb)	TUB
control_d65_vs_control_VPA_high_1B	chr11_8168352_8169494	47.3533919501275	1.97620574948537	5.73105936773348e-08	1.66467107783797e-06	Promoter (<=1kb)	RIC3
control_d65_vs_control_VPA_high_1B	chr11_8206090_8207425	49.0232337640553	3.28289243565974	8.93988077182209e-14	7.97908576443886e-12	Distal Intergenic	RIC3
control_d65_vs_control_VPA_high_1B	chr11_8241555_8243264	51.3680817329112	1.54863235874229	0.000166028703780185	0.0018072053065286	Intron (ENST00000335790.8/4004, intron 1 of 3)	LMO1
control_d65_vs_control_VPA_high_1B	chr11_8268117_8269333	54.5713430687717	1.30599653341854	0.000133849164879366	0.00150866762535576	Promoter (<=1kb)	LMO1
control_d65_vs_control_VPA_high_1B	chr11_8282517_8284364	86.8930868565882	1.84776433687489	4.84483206259855e-10	2.19349964195042e-08	Distal Intergenic	LMO1
control_d65_vs_control_VPA_high_1B	chr11_8288869_8290429	43.5725873984468	3.0208942552678	9.43670721448613e-10	4.02992681315114e-08	Distal Intergenic	LMO1
control_d65_vs_control_VPA_high_1B	chr11_9066242_9067069	25.4121602554556	2.51949644081805	2.03605714174027e-07	5.19160714987663e-06	Promoter (<=1kb)	SCUBE2
control_d65_vs_control_VPA_high_1B	chr11_9473258_9473959	20.8385658073027	2.26010331989316	0.000835381353324332	0.00685917975108014	Promoter (2-3kb)	ZNF143
control_d65_vs_control_VPA_high_1B	chr11_10351551_10353056	103.635717323238	1.23950546477119	0.000549054842097904	0.00487232400965317	Intron (ENST00000527261.5/100130460, intron 2 of 2)	CAND1.11
control_d65_vs_control_VPA_high_1B	chr11_10511109_10511800	30.7423441924711	2.42953561183707	6.63573948470762e-05	0.000831954794539952	Promoter (1-2kb)	MTRNR2L8
control_d65_vs_control_VPA_high_1B	chr11_12067694_12068558	22.8790334322155	2.89773747817784	0.000292223375722615	0.00289789876911752	Intron (ENST00000476130.2/ENST00000476130.2, intron 1 of 1)	MICAL2
control_d65_vs_control_VPA_high_1B	chr11_12215013_12215887	23.8565028050507	2.89623960191001	1.3233839822493e-06	2.76769179007821e-05	Promoter (1-2kb)	MICAL2
control_d65_vs_control_VPA_high_1B	chr11_12802385_12803529	34.5503215455767	1.48438476213958	0.00133442008147517	0.0100053148366401	Intron (ENST00000527636.6/7003, intron 3 of 12)	TEAD1
control_d65_vs_control_VPA_high_1B	chr11_12913837_12915038	59.3459124078239	1.47550382097334	3.05137154945409e-06	5.75150068927265e-05	Intron (ENST00000527636.6/7003, intron 10 of 12)	TEAD1
control_d65_vs_control_VPA_high_1B	chr11_13101697_13102636	41.9894115019371	2.12427305675528	1.43425687350562e-06	2.97207246055979e-05	Intron (ENST00000531136.1/ENST00000531136.1, intron 1 of 1)	RASSF10
control_d65_vs_control_VPA_high_1B	chr11_13207290_13208688	25.8675176878631	1.96214929274818	9.55722783835413e-05	0.00113403853771557	Distal Intergenic	ARNTL
control_d65_vs_control_VPA_high_1B	chr11_13229139_13230605	29.3264054549291	2.73746355149248	5.22429608239607e-07	1.20774965422861e-05	Distal Intergenic	ARNTL
control_d65_vs_control_VPA_high_1B	chr11_13873031_13873846	25.4180016069523	2.03585912827674	0.000267963911286656	0.0026951328889682	Promoter (2-3kb)	LINC02545
control_d65_vs_control_VPA_high_1B	chr11_14386665_14387643	38.4659185342029	2.66662646797476	8.90327856096964e-09	3.10611299967633e-07	Distal Intergenic	RRAS2
control_d65_vs_control_VPA_high_1B	chr11_14973609_14975337	41.7717453098354	2.40835478513709	2.24272043549929e-06	4.3977704892292e-05	Promoter (1-2kb)	CALCA
control_d65_vs_control_VPA_high_1B	chr11_15565762_15566542	25.4069378764043	4.50334828462767	1.2514109636762e-10	6.37362723467032e-09	Intron (ENST00000527770.1/ENST00000527770.1, intron 3 of 4)	LOC102724957
control_d65_vs_control_VPA_high_1B	chr11_15870638_15871393	24.0928420402558	3.51251456984192	1.84228297923549e-08	6.03833842122127e-07	Intron (ENST00000659436.1/ENST00000659436.1, intron 2 of 2)	MIR6073
control_d65_vs_control_VPA_high_1B	chr11_16085419_16086680	26.1683387948062	1.54963420470713	0.00138020800988917	0.0102748131279172	Intron (ENST00000316399.10/55553, intron 8 of 14)	SOX6
control_d65_vs_control_VPA_high_1B	chr11_16169610_16170731	30.4599776188988	1.40703078010044	0.00927662230169407	0.0452008591453242	Intron (ENST00000316399.10/55553, intron 5 of 14)	SOX6
control_d65_vs_control_VPA_high_1B	chr11_16402510_16403740	102.084516421617	2.77068976970012	1.38931978392e-16	1.92196628483912e-14	Promoter (<=1kb)	SOX6
control_d65_vs_control_VPA_high_1B	chr11_16404830_16405535	21.9503758645831	3.12627267265939	4.52719010930833e-07	1.06436754278827e-05	Promoter (1-2kb)	SOX6
control_d65_vs_control_VPA_high_1B	chr11_16897223_16898145	39.1511128871508	1.90239491992555	7.60140199218659e-06	0.000127952028651431	Intron (ENST00000531066.6/144100, intron 3 of 26)	PLEKHA7
control_d65_vs_control_VPA_high_1B	chr11_17765372_17766221	25.8939836572994	1.67663413818586	0.000793645077020165	0.00658138739230674	Promoter (<=1kb)	KCNC1
control_d65_vs_control_VPA_high_1B	chr11_18705645_18706917	34.1813888559858	1.6370040459072	6.98260143038636e-05	0.00086828873104722	Promoter (<=1kb)	IGSF22
control_d65_vs_control_VPA_high_1B	chr11_18790908_18792840	72.6735395333448	1.68847619612062	2.44194360705212e-06	4.73578840637623e-05	Promoter (<=1kb)	PTPN5
control_d65_vs_control_VPA_high_1B	chr11_19187202_19188425	68.1325785591525	2.35724307710005	4.98257401397901e-08	1.46931390442405e-06	Exon (ENST00000265968.9/8048, exon 3 of 6)	CSRP3
control_d65_vs_control_VPA_high_1B	chr11_19344883_19346825	117.349108328996	2.14529967773746	8.43508552126662e-15	8.87803885069913e-13	Distal Intergenic	NAV2
control_d65_vs_control_VPA_high_1B	chr11_19381903_19383710	89.5773629078778	1.45056573326323	2.38765105817717e-06	4.64586322931562e-05	Intron (ENST00000360655.8/89797, intron 1 of 37)	NAV2
control_d65_vs_control_VPA_high_1B	chr11_19474909_19475956	39.4990471538076	3.05408441748002	1.92815582288403e-09	7.6705278520982e-08	Intron (ENST00000360655.8/89797, intron 1 of 37)	NAV2-AS5
control_d65_vs_control_VPA_high_1B	chr11_19552184_19553326	34.1617777226376	1.18517907353713	0.00491048289868044	0.02780923647501	Intron (ENST00000360655.8/89797, intron 1 of 37)	MIR4486
control_d65_vs_control_VPA_high_1B	chr11_19676294_19676867	29.4644796372596	1.97684049430866	4.71293587839189e-05	0.000621612356499874	Intron (ENST00000360655.8/89797, intron 1 of 37)	LOC100126784
control_d65_vs_control_VPA_high_1B	chr11_19831699_19832584	44.4278899424464	2.88507878886371	4.49413591382456e-10	2.05243532159742e-08	Exon (ENST00000360655.8/89797, exon 2 of 38)	NAV2
control_d65_vs_control_VPA_high_1B	chr11_19999996_20001231	125.135576036523	1.68343300500752	3.75315697595265e-07	9.00008216682614e-06	Intron (ENST00000360655.8/89797, intron 11 of 37)	NAV2
control_d65_vs_control_VPA_high_1B	chr11_20042411_20043436	41.2338108771002	2.1230284670555	3.72864493902294e-05	0.00050792022277878	Intron (ENST00000360655.8/89797, intron 12 of 37)	NAV2-AS2
control_d65_vs_control_VPA_high_1B	chr11_22192249_22194155	100.936651476959	1.00059506240679	0.000594339653249402	0.00519509857505474	Promoter (<=1kb)	ANO5
control_d65_vs_control_VPA_high_1B	chr11_22340557_22341660	27.1207418442341	1.77881155569217	0.0011165966490258	0.00866509948601279	Promoter (1-2kb)	SLC17A6
control_d65_vs_control_VPA_high_1B	chr11_22349290_22350128	28.2016028606001	3.27479250239338	1.42216991818297e-09	5.82143500020744e-08	Intron (ENST00000263160.4/57084, intron 3 of 11)	SLC17A6
control_d65_vs_control_VPA_high_1B	chr11_22432037_22433406	29.3129432618177	1.88871405654068	0.000161740600298811	0.00176864189287805	Distal Intergenic	LINC01495
control_d65_vs_control_VPA_high_1B	chr11_22508394_22509322	25.0475297230933	2.02125396888719	4.3747787552144e-05	0.000583184864074474	Exon (ENST00000656032.1/ENST00000656032.1, exon 3 of 4)	LINC01495
control_d65_vs_control_VPA_high_1B	chr11_22558271_22559400	30.1497054976883	2.29518381919908	2.05631496755081e-06	4.09467748997487e-05	Distal Intergenic	LINC01495
control_d65_vs_control_VPA_high_1B	chr11_22780884_22781746	24.8236421862685	1.7547716158148	0.00123949841193415	0.00942440500516535	Intron (ENST00000454584.6/2620, intron 7 of 7)	GAS2
control_d65_vs_control_VPA_high_1B	chr11_24513588_24514799	24.9266481368836	1.6291546239179	0.00194899926375754	0.01349561315895	Intron (ENST00000531187.5/338645, intron 1 of 5)	LUZP2
control_d65_vs_control_VPA_high_1B	chr11_27443624_27444476	62.7694490052504	2.05044617400395	1.13650502577443e-07	3.08074151302732e-06	Intron (ENST00000389858.4/55366, intron 1 of 16)	LGR4-AS1
control_d65_vs_control_VPA_high_1B	chr11_27717948_27719569	99.0482576924917	1.23704309517882	9.36649853498917e-06	0.000153399114110742	Promoter (<=1kb)	BDNF
control_d65_vs_control_VPA_high_1B	chr11_28546850_28548156	20.9987341997525	3.69174933793164	9.86643075342462e-07	2.12791680728355e-05	Distal Intergenic	MIR8068
control_d65_vs_control_VPA_high_1B	chr11_29562078_29562743	21.6172473679115	3.95547429485423	6.30947923310988e-08	1.81601133006573e-06	Intron (ENST00000525097.1/ENST00000525097.1, intron 1 of 3)	LINC02546
control_d65_vs_control_VPA_high_1B	chr11_30479792_30480556	26.075456109722	3.77433011096795	1.12027893279975e-06	2.38363885300351e-05	Intron (ENST00000448418.6/744, intron 4 of 6)	MPPED2
control_d65_vs_control_VPA_high_1B	chr11_30560336_30561208	20.3855292862392	2.38997846799702	0.000392307302229353	0.00369343966516542	Intron (ENST00000448418.6/744, intron 2 of 6)	MPPED2
control_d65_vs_control_VPA_high_1B	chr11_30579050_30580011	35.3768463006062	2.49779346222828	9.96514119305616e-06	0.000162058332213328	Promoter (<=1kb)	MPPED2
control_d65_vs_control_VPA_high_1B	chr11_30635299_30636107	70.9592674405765	4.1161630815411	7.24532640764452e-17	1.04509901451397e-14	Distal Intergenic	MPPED2
control_d65_vs_control_VPA_high_1B	chr11_31106780_31107448	21.163986650381	2.14484086822395	0.000176980563815161	0.00190725308002471	3' UTR	DCDC1
control_d65_vs_control_VPA_high_1B	chr11_31132150_31133400	29.3606297855085	3.72695733450804	7.31959965505134e-07	1.63195717798441e-05	Intron (ENST00000597505.5/341019, intron 8 of 35)	DCDC1
control_d65_vs_control_VPA_high_1B	chr11_31141563_31142287	29.6635244404522	4.16696952949799	1.08017717640839e-05	0.000173862736704325	Intron (ENST00000597505.5/341019, intron 7 of 35)	DCDC1
control_d65_vs_control_VPA_high_1B	chr11_31160929_31161852	29.096640438039	2.68674939908199	1.10121014322255e-06	2.34832945240525e-05	Intron (ENST00000597505.5/341019, intron 7 of 35)	DCDC1
control_d65_vs_control_VPA_high_1B	chr11_31238072_31238857	40.2920821194205	3.02695273673827	3.12179729821317e-07	7.62177347470426e-06	Promoter (2-3kb)	DCDC1
control_d65_vs_control_VPA_high_1B	chr11_31243519_31244192	20.5373741168476	1.95517532838966	0.00229260727841611	0.0153564090764134	Promoter (1-2kb)	DCDC1
control_d65_vs_control_VPA_high_1B	chr11_31246295_31247911	31.8225589601605	1.33716944056677	0.00119776721110356	0.00916267325932114	Intron (ENST00000597505.5/341019, intron 6 of 35)	DCDC1
control_d65_vs_control_VPA_high_1B	chr11_31421426_31422448	26.9139687514641	2.22329007316891	0.000387950961303887	0.00365985861209052	Promoter (<=1kb)	DNAJC24
control_d65_vs_control_VPA_high_1B	chr11_31763222_31763811	20.9895313298553	1.8840827308307	0.00585582999562945	0.0318413651103011	Promoter (1-2kb)	ELP4
control_d65_vs_control_VPA_high_1B	chr11_31764038_31765276	68.7191862428113	2.34992908836729	1.67270626913234e-13	1.43603490063073e-11	Promoter (2-3kb)	ELP4
control_d65_vs_control_VPA_high_1B	chr11_31787909_31788716	25.6027052153635	2.70905086361078	0.000493050811872889	0.00446417346339705	3' UTR	PAX6
control_d65_vs_control_VPA_high_1B	chr11_31813451_31814144	31.928901867551	1.47773314013767	0.00047753664833789	0.00434978390219625	Promoter (<=1kb)	PAX6-AS1
control_d65_vs_control_VPA_high_1B	chr11_31824057_31825071	26.4263520884727	1.85785470853925	0.00038954844229398	0.00367180120939693	Promoter (1-2kb)	PAUPAR
control_d65_vs_control_VPA_high_1B	chr11_31875809_31876643	33.9553520178727	1.8815625806172	0.000226254625446605	0.00234021452624287	Intron (ENST00000530348.5/5954, intron 1 of 3)	PAUPAR
control_d65_vs_control_VPA_high_1B	chr11_31967534_31968302	25.9306835281157	4.32330172746965	2.11292731096651e-08	6.82442656727042e-07	Intron (ENST00000530348.5/5954, intron 1 of 3)	LOC100506675
control_d65_vs_control_VPA_high_1B	chr11_32526787_32527918	26.0936389182385	2.2619356130923	4.26531052361497e-06	7.72630480160976e-05	Distal Intergenic	EIF3M
control_d65_vs_control_VPA_high_1B	chr11_33598360_33599152	24.9221668798608	3.49539084794157	5.89819270444137e-09	2.14128778521138e-07	3' UTR	KIAA1549L
control_d65_vs_control_VPA_high_1B	chr11_33891072_33892061	65.1663884471052	2.8046041482118	3.22676678347750e-12	2.18641417817507e-10	Promoter (<=1kb)	LMO2
control_d65_vs_control_VPA_high_1B	chr11_33930215_33931370	24.2321225795411	1.93524426631388	5.13653331554729e-05	0.00066832933249859	Distal Intergenic	LMO2
control_d65_vs_control_VPA_high_1B	chr11_34299289_34300959	53.6357788155438	1.2928916368633	0.000259695859063805	0.00262601860205606	Intron (ENST00000435224.3/25841, intron 1 of 16)	ABTB2
control_d65_vs_control_VPA_high_1B	chr11_35222943_35223973	31.5398880447474	1.93329318417519	1.53237429974725e-05	0.000235413599843877	3' UTR	CD44
control_d65_vs_control_VPA_high_1B	chr11_35418106_35420448	84.162748346964	1.11427225339587	0.00044888702821499	0.00413396625365174	Promoter (<=1kb)	SLC1A2
control_d65_vs_control_VPA_high_1B	chr11_35485530_35486308	26.9629765657674	1.35201132689532	0.00316648312552605	0.0197808199411211	Intron (ENST00000622144.4/25891, intron 3 of 11)	PAMR1
control_d65_vs_control_VPA_high_1B	chr11_35918560_35919847	35.989937005938	1.89613933478913	0.000122416072631372	0.00139774067327873	Exon (ENST00000531569.1/ENST00000531569.1, exon 1 of 3)	LDLRAD3
control_d65_vs_control_VPA_high_1B	chr11_36069806_36071300	32.8478333111776	1.40709597372927	0.00145063018171491	0.0106891117320404	Intron (ENST00000524419.5/143458, intron 1 of 5)	LDLRAD3
control_d65_vs_control_VPA_high_1B	chr11_36109210_36111247	99.5992944984675	1.22504294110536	3.51596058803545e-06	6.52330380426093e-05	Promoter (<=1kb)	LDLRAD3
control_d65_vs_control_VPA_high_1B	chr11_36195954_36197011	32.2414672817263	1.67101679940251	8.96720377876539e-05	0.00107523380720708	Exon (ENST00000623261.1/ENST00000623261.1, exon 1 of 1)	LDLRAD3
control_d65_vs_control_VPA_high_1B	chr11_36251704_36252326	20.8219028781044	2.35070716506068	0.000180531105486561	0.00193776404018544	Distal Intergenic	COMMD9
control_d65_vs_control_VPA_high_1B	chr11_36278452_36279447	35.4202670216693	1.32219528205886	0.00265123189164515	0.0172159507694678	Promoter (2-3kb)	COMMD9
control_d65_vs_control_VPA_high_1B	chr11_36385093_36386028	35.447830771985	1.55131728459745	0.000806291096152728	0.00667043927845541	Intron (ENST00000529034.5/79899, intron 1 of 3)	PRR5L
control_d65_vs_control_VPA_high_1B	chr11_40168215_40168933	25.3982501413854	2.96818276245729	1.97481484844536e-06	3.9449989054834e-05	Intron (ENST00000278198.2/57689, intron 1 of 1)	LRRC4C
control_d65_vs_control_VPA_high_1B	chr11_40280188_40281588	43.4800471879665	2.05276244931284	8.26172838545879e-08	2.31442173514287e-06	Intron (ENST00000278198.2/57689, intron 1 of 1)	LRRC4C
control_d65_vs_control_VPA_high_1B	chr11_41394085_41395209	49.8845248910914	2.45978802262852	1.29956632939914e-07	3.47020615847611e-06	Exon (ENST00000524493.1/ENST00000524493.1, exon 1 of 3)	LRRC4C
control_d65_vs_control_VPA_high_1B	chr11_43267964_43269857	40.5769254425272	1.89555528017019	2.04083569277405e-07	5.20179557616335e-06	Promoter (<=1kb)	HNRNPKP3
control_d65_vs_control_VPA_high_1B	chr11_43516075_43517051	67.9401858919994	2.24658272690503	1.65009822322715e-09	6.65467287896905e-08	Distal Intergenic	TTC17
control_d65_vs_control_VPA_high_1B	chr11_43576796_43577497	30.1085580808821	2.46200204337959	1.61400994037485e-06	3.29253403166154e-05	Promoter (1-2kb)	HSD17B12
control_d65_vs_control_VPA_high_1B	chr11_43834884_43835802	23.5405848192492	2.75389032934836	1.01060759434149e-07	2.7760862822323e-06	Promoter (<=1kb)	HSD17B12
control_d65_vs_control_VPA_high_1B	chr11_43933604_43934572	33.7977001662242	1.27554600693064	0.0010680408460406	0.00835988968489124	Intron (ENST00000526408.1/ENST00000526408.1, intron 2 of 6)	C11orf96
control_d65_vs_control_VPA_high_1B	chr11_44004910_44005708	50.2629452538031	3.41352096106732	3.55956154605609e-09	1.3495328184863e-07	Distal Intergenic	ACCSL
control_d65_vs_control_VPA_high_1B	chr11_44760863_44762046	43.2702989647372	1.3219488967296	0.000337983673336275	0.00326701708504549	Promoter (2-3kb)	TSPAN18
control_d65_vs_control_VPA_high_1B	chr11_44793582_44794303	48.7646235984673	2.98889910067194	5.71159282305994e-13	4.43719089207212e-11	Intron (ENST00000533786.5/90139, intron 2 of 6)	TSPAN18
control_d65_vs_control_VPA_high_1B	chr11_44877522_44878581	46.7903265188021	1.27880485968159	0.000853479048436147	0.00697685698308669	Intron (ENST00000533786.5/90139, intron 3 of 6)	TSPAN18
control_d65_vs_control_VPA_high_1B	chr11_45048811_45049816	21.4615197293185	2.96362881827627	8.03538817940129e-07	1.77506925089864e-05	Distal Intergenic	PRDM11
control_d65_vs_control_VPA_high_1B	chr11_45056215_45057093	30.7812110707621	1.73639346454911	0.00257346346076527	0.0168045612896264	Distal Intergenic	PRDM11
control_d65_vs_control_VPA_high_1B	chr11_45384451_45385840	33.8346910798297	1.54123161901649	0.000578135915484868	0.00508399498029232	Promoter (<=1kb)	LINC02687
control_d65_vs_control_VPA_high_1B	chr11_45606422_45607172	22.0394962018728	1.57551052966563	0.00180429789521635	0.0127261638261967	Distal Intergenic	CHST1
control_d65_vs_control_VPA_high_1B	chr11_45982801_45983837	40.0884795630287	1.39889631126564	0.000150233993964396	0.0016637156691754	Intron (ENST00000323180.10/51317, intron 5 of 17)	PHF21A
control_d65_vs_control_VPA_high_1B	chr11_46912443_46913307	50.9274840995971	1.22995171773703	0.0017391256660318	0.0123613971696775	Intron (ENST00000378623.6/4038, intron 1 of 37)	LRP4
control_d65_vs_control_VPA_high_1B	chr11_46976939_46978185	64.7594639298095	2.31563201145324	2.37144666999256e-09	9.28212071227837e-08	Intron (ENST00000533124.5/79096, intron 1 of 2)	C11orf49
control_d65_vs_control_VPA_high_1B	chr11_47020889_47022074	44.7588055426668	1.27708046072942	0.00880688080792775	0.0434741465848789	Intron (ENST00000533124.5/79096, intron 1 of 2)	C11orf49
control_d65_vs_control_VPA_high_1B	chr11_47104205_47105022	26.5601317594208	2.48805325857952	9.20375831898856e-06	0.000151044077208948	Intron (ENST00000533124.5/79096, intron 2 of 2)	C11orf49
control_d65_vs_control_VPA_high_1B	chr11_48005490_48006341	22.8372616495159	2.3299731492259	0.00122457214172668	0.00933048802372229	Intron (ENST00000613246.4/5795, intron 1 of 24)	PTPRJ
control_d65_vs_control_VPA_high_1B	chr11_48109273_48110280	23.6044883706099	1.6268077905416	0.00112229912006131	0.00870088439263179	Exon (ENST00000613246.4/5795, exon 2 of 25)	MIR3161
control_d65_vs_control_VPA_high_1B	chr11_57087714_57088449	20.3081542471328	3.18696493525094	8.97463535449363e-07	1.95930012784638e-05	Distal Intergenic	OR5AK4P
control_d65_vs_control_VPA_high_1B	chr11_57155892_57156737	24.302267468522	1.97113792923733	0.0097532365346871	0.0469834394239944	Distal Intergenic	LRRC55
control_d65_vs_control_VPA_high_1B	chr11_57179778_57181340	32.3388047798681	2.55298851760876	5.63960857100032e-06	9.87122144345096e-05	Promoter (<=1kb)	LRRC55
control_d65_vs_control_VPA_high_1B	chr11_57213107_57214336	91.4341089702059	2.51578135083299	1.30823800421854e-13	1.14082245489479e-11	Distal Intergenic	APLNR
control_d65_vs_control_VPA_high_1B	chr11_58905039_58906324	73.6751006319305	1.21223253470262	9.42760745598228e-05	0.00112046493526515	Promoter (<=1kb)	GLYATL1
control_d65_vs_control_VPA_high_1B	chr11_59058063_59058945	49.960868489359	1.6439455628485	8.97995216831304e-06	0.000147943598755746	Promoter (<=1kb)	LOC283194
control_d65_vs_control_VPA_high_1B	chr11_59174854_59175583	51.5072921208827	1.62424318508777	3.47285789699851e-05	0.00047721812251676	Promoter (2-3kb)	DTX4
control_d65_vs_control_VPA_high_1B	chr11_59180038_59180807	41.9459346626118	2.84255286497919	6.40744235099652e-06	0.000110149879518951	Intron (ENST00000532982.5/23220, intron 1 of 8)	DTX4
control_d65_vs_control_VPA_high_1B	chr11_59184389_59185435	94.1512882529549	2.78392585635304	3.76513719747271e-13	3.02403319809587e-11	Promoter (<=1kb)	DTX4
control_d65_vs_control_VPA_high_1B	chr11_59426051_59427333	62.1532274107505	2.54740710015402	1.94509317279971e-08	6.33987154390011e-07	Promoter (<=1kb)	OR5A2
control_d65_vs_control_VPA_high_1B	chr11_59528430_59529455	23.045819931895	1.67279308165936	0.00266039634558922	0.0172602802157075	Distal Intergenic	OR4D9
control_d65_vs_control_VPA_high_1B	chr11_60947948_60948676	25.582654094381	2.18862932530877	8.75110774979242e-05	0.00105363189315101	Promoter (<=1kb)	SLC15A3
control_d65_vs_control_VPA_high_1B	chr11_61480440_61481517	42.9231583318271	1.48696610672165	0.0022524497338188	0.0151393116638404	Promoter (<=1kb)	PPP1R32
control_d65_vs_control_VPA_high_1B	chr11_61499700_61500650	34.2635080537354	1.64103514740833	0.000820625626401469	0.00676432501325782	Exon (ENST00000534856.1/ENST00000534856.1, exon 2 of 2)	MIR4488
control_d65_vs_control_VPA_high_1B	chr11_61555209_61555987	40.2136341816618	1.24781741655353	0.00426740228929612	0.024990880633432	Intron (ENST00000263846.8/9066, intron 2 of 8)	SYT7
control_d65_vs_control_VPA_high_1B	chr11_61602900_61604009	22.5595673342917	1.56404959493794	0.00290291845252748	0.0184972089447832	Intron (ENST00000667359.1/101927495, intron 3 of 3)	RPLP0P2
control_d65_vs_control_VPA_high_1B	chr11_62707251_62707807	110.17246900792	1.44669669097452	2.03826709575207e-09	8.06511299066678e-08	Promoter (<=1kb)	BSCL2
control_d65_vs_control_VPA_high_1B	chr11_64489625_64490709	32.0724963449731	1.32943206695498	0.00595259249233039	0.0322346378310105	Exon (ENST00000670317.1/ENST00000670317.1, exon 1 of 3)	LINC02724
control_d65_vs_control_VPA_high_1B	chr11_67002099_67003150	31.4244294955887	2.20417063144038	0.000207542522564095	0.00218026832330639	Distal Intergenic	SYT12
control_d65_vs_control_VPA_high_1B	chr11_70477551_70478471	29.2257165575492	1.50158026314911	0.000892942391127903	0.00723683757782587	Exon (ENST00000445532.1/ENST00000445532.1, exon 1 of 2)	SHANK2
control_d65_vs_control_VPA_high_1B	chr11_70503036_70504335	32.6706801160718	1.41653492173639	0.00038820486693373	0.00366138755695361	Promoter (<=1kb)	SHANK2
control_d65_vs_control_VPA_high_1B	chr11_70521713_70523708	55.5833018782347	1.51795077909826	1.28666203567019e-05	0.000202343744211668	Intron (ENST00000449833.6/22941, intron 2 of 9)	SHANK2
control_d65_vs_control_VPA_high_1B	chr11_70544923_70545768	28.5934292096296	1.291427002462	0.00833165173179938	0.0416906551986613	Intron (ENST00000449833.6/22941, intron 2 of 9)	SHANK2
control_d65_vs_control_VPA_high_1B	chr11_70826239_70827262	44.0420692558694	1.35001498290351	0.000340841236206926	0.00328937534241411	Promoter (<=1kb)	SHANK2
control_d65_vs_control_VPA_high_1B	chr11_70913618_70914457	28.5848069423571	2.06836021727321	0.000264468631069069	0.00266468353445007	Intron (ENST00000601538.5/22941, intron 9 of 24)	SHANK2
control_d65_vs_control_VPA_high_1B	chr11_72085842_72086826	35.3675023532421	1.34502689524313	0.00523020946729791	0.0291911788915074	Promoter (1-2kb)	LRTOMT
control_d65_vs_control_VPA_high_1B	chr11_73576005_73576776	26.0300977888866	2.43669661121632	1.4582118280926e-05	0.000225707504529038	Intron (ENST00000064778.8/23201, intron 1 of 8)	FAM168A
control_d65_vs_control_VPA_high_1B	chr11_75532057_75532730	20.5608303170675	1.90457098271356	0.00097388904681748	0.00776284081438192	Distal Intergenic	GDPD5
control_d65_vs_control_VPA_high_1B	chr11_75663570_75664184	21.6200689559899	2.00625970944622	0.00242457877242739	0.0160462826588862	Intron (ENST00000304771.7/4135, intron 1 of 3)	MAP6
control_d65_vs_control_VPA_high_1B	chr11_77457132_77458005	43.1649700602432	2.99937817565367	1.55114591440446e-07	4.06861491385357e-06	Intron (ENST00000356341.7/5058, intron 1 of 14)	PAK1
control_d65_vs_control_VPA_high_1B	chr11_77602207_77603070	24.8875513435689	1.21343526362785	0.00629785215456252	0.0336513114544996	Intron (ENST00000528638.1/282679, intron 2 of 3)	AQP11
control_d65_vs_control_VPA_high_1B	chr11_78100251_78101382	34.5763549877998	3.59636003502452	1.17576569011269e-14	1.21316867112424e-12	3' UTR	ALG8
control_d65_vs_control_VPA_high_1B	chr11_78825270_78826193	24.0000978732748	2.65759112149251	2.16284436075901e-06	4.26674291875177e-05	Intron (ENST00000278550.12/26011, intron 12 of 33)	TENM4
control_d65_vs_control_VPA_high_1B	chr11_79082677_79083414	32.4763402113751	2.81381222359219	1.58574126375311e-07	4.14572036674265e-06	Intron (ENST00000278550.12/26011, intron 4 of 33)	TENM4
control_d65_vs_control_VPA_high_1B	chr11_82522720_82523825	20.0595713415879	2.53814320814279	2.34753186441156e-05	0.000341037084275606	Intron (ENST00000532217.1/101928989, intron 3 of 4)	MIR4300HG
control_d65_vs_control_VPA_high_1B	chr11_82756896_82757888	33.5971966670327	2.37356821948864	2.57303395237523e-07	6.40434543975768e-06	Distal Intergenic	FAM181B
control_d65_vs_control_VPA_high_1B	chr11_82845244_82846568	28.9457506472643	2.24330180092951	4.17295251086853e-06	7.57891209212461e-05	Promoter (<=1kb)	PRCP
control_d65_vs_control_VPA_high_1B	chr11_83681141_83682917	38.1098759591036	1.24394402308472	0.00273946315287091	0.0176623119011677	Promoter (<=1kb)	DLG2
control_d65_vs_control_VPA_high_1B	chr11_84102921_84103756	46.0649703538735	3.00779915653351	1.61348692311741e-05	0.000246035465597615	Intron (ENST00000280241.12/1740, intron 3 of 21)	DLG2
control_d65_vs_control_VPA_high_1B	chr11_84316806_84317603	23.4275612064861	2.45162935720206	7.88291812400227e-06	0.00013201950738027	Promoter (<=1kb)	DLG2
control_d65_vs_control_VPA_high_1B	chr11_84419476_84420547	30.4301736954316	2.13328160922482	1.05705907108144e-05	0.000170513430639102	Intron (ENST00000398309.6/1740, intron 2 of 22)	DLG2
control_d65_vs_control_VPA_high_1B	chr11_84648150_84648944	30.0089373905699	2.95275065337454	1.35188398623392e-05	0.000211267376230626	Intron (ENST00000398309.6/1740, intron 1 of 22)	DLG2
control_d65_vs_control_VPA_high_1B	chr11_84719797_84721381	48.6343242800898	1.99261871964871	4.28057358704459e-05	0.000572080465461914	Promoter (<=1kb)	DLG2
control_d65_vs_control_VPA_high_1B	chr11_85182090_85183262	30.9781878134076	2.70689895338067	1.38639023945491e-07	3.67906481195925e-06	Intron (ENST00000376104.6/1740, intron 4 of 27)	DLG2
control_d65_vs_control_VPA_high_1B	chr11_86588387_86589271	102.299794929209	2.83527118562445	2.4739992431883e-10	1.18467896500748e-08	Intron (ENST00000524610.1/ENST00000524610.1, intron 2 of 2)	ME3
control_d65_vs_control_VPA_high_1B	chr11_86677878_86679238	73.2126922088699	2.2868504065198	1.29844065760963e-05	0.000203986879448222	Distal Intergenic	ME3
control_d65_vs_control_VPA_high_1B	chr11_87082790_87083695	24.6865665857108	1.82492254865842	0.00196625495705911	0.0135919640984085	Intron (ENST00000340353.11/65084, intron 3 of 13)	TMEM135
control_d65_vs_control_VPA_high_1B	chr11_87639719_87640571	35.4406554951334	3.26648309846422	4.76942551361221e-08	1.41185294280494e-06	Distal Intergenic	LINC02711
control_d65_vs_control_VPA_high_1B	chr11_87743002_87743981	21.211908743862	2.51094474579644	0.000122598808554495	0.00139934624048694	Distal Intergenic	LINC02711
control_d65_vs_control_VPA_high_1B	chr11_89065458_89066304	20.4420914500728	2.22394070076748	0.00192176376799209	0.0133457421989513	Promoter (<=1kb)	GRM5
control_d65_vs_control_VPA_high_1B	chr11_89442895_89444429	39.5009576570866	2.75376195644816	1.08569491616496e-09	4.56697486300526e-08	Exon (ENST00000263317.9/50507, exon 5 of 18)	NOX4
control_d65_vs_control_VPA_high_1B	chr11_90638921_90640005	27.8752597146072	1.80276082068319	4.93642088327899e-05	0.000646045008796043	Intron (ENST00000649150.1/101929222, intron 3 of 7)	MIR4490
control_d65_vs_control_VPA_high_1B	chr11_92308783_92310117	63.7150325950695	3.94731487909139	6.24396073735302e-13	4.81512029844633e-11	Distal Intergenic	FAT3
control_d65_vs_control_VPA_high_1B	chr11_92784063_92785038	33.6823182494429	2.28288907170477	1.63378042460395e-07	4.26013855491301e-06	Intron (ENST00000409404.6/120114, intron 6 of 24)	FAT3
control_d65_vs_control_VPA_high_1B	chr11_93234427_93235120	29.0285524074135	1.13404682648486	0.00709204740899291	0.0368536453285047	Distal Intergenic	SLC36A4
control_d65_vs_control_VPA_high_1B	chr11_94922387_94923225	20.1094306258972	2.5919894330548	1.91695634441387e-05	0.000285774438702907	Intron (ENST00000545958.1/ENST00000545958.1, intron 1 of 1)	CWC15
control_d65_vs_control_VPA_high_1B	chr11_95232153_95232536	21.8222239530528	1.78623185572029	0.00430125882708087	0.0251455374212137	Promoter (<=1kb)	SESN3
control_d65_vs_control_VPA_high_1B	chr11_96054913_96056371	56.7712065059799	1.4003027019115	7.14243470424318e-05	0.000885843208207592	Intron (ENST00000524717.6/84441, intron 2 of 4)	MAML2
control_d65_vs_control_VPA_high_1B	chr11_96084789_96086464	49.9720893265838	2.10677733274915	1.95628995573502e-07	5.01064599146798e-06	Intron (ENST00000524717.6/84441, intron 2 of 4)	MAML2
control_d65_vs_control_VPA_high_1B	chr11_96178267_96179249	24.2112449968682	3.39983904582993	2.84905457059921e-08	8.9020005083177e-07	Intron (ENST00000524717.6/84441, intron 1 of 4)	MAML2
control_d65_vs_control_VPA_high_1B	chr11_102115519_102116040	25.2521034445264	2.13845530804756	0.00136049698763439	0.0101613802182367	Intron (ENST00000282441.10/10413, intron 2 of 8)	YAP1
control_d65_vs_control_VPA_high_1B	chr11_102119691_102120748	30.1632413577427	1.75719759674246	0.000260928344556678	0.00263594089971092	Intron (ENST00000282441.10/10413, intron 2 of 8)	YAP1
control_d65_vs_control_VPA_high_1B	chr11_103536972_103537766	29.7183025247426	2.22832772296337	1.07845270951541e-05	0.000173613206679366	Distal Intergenic	DYNC2H1
control_d65_vs_control_VPA_high_1B	chr11_103998676_103999786	24.7892370733373	2.57643707192641	6.57960670582888e-06	0.00011277887174378	Intron (ENST00000393158.7/80310, intron 2 of 6)	DDI1
control_d65_vs_control_VPA_high_1B	chr11_105609305_105611143	71.0502135600115	1.69559566149285	4.10731001782398e-08	1.23439744129827e-06	Promoter (<=1kb)	GRIA4
control_d65_vs_control_VPA_high_1B	chr11_106012271_106013217	20.6405482557006	1.49670139010965	0.0053018779621333	0.0295077381271826	Promoter (1-2kb)	MSANTD4
control_d65_vs_control_VPA_high_1B	chr11_107268646_107269536	21.2495434187607	3.59035687146262	2.27304776720674e-07	5.73132332615101e-06	Distal Intergenic	CWF19L2
control_d65_vs_control_VPA_high_1B	chr11_107666837_107667902	25.6064873750624	3.06757765557511	1.27942432390468e-06	2.68528238864078e-05	Distal Intergenic	ELMOD1
control_d65_vs_control_VPA_high_1B	chr11_108926914_108927629	21.7258831291913	2.55857144027152	1.10348788199344e-05	0.000177199851235592	Promoter (1-2kb)	DDX10
control_d65_vs_control_VPA_high_1B	chr11_109421918_109422724	37.6227088329472	1.76600228575901	0.000692082117735295	0.00588582772363738	Promoter (<=1kb)	C11orf87
control_d65_vs_control_VPA_high_1B	chr11_110030034_110030652	24.3630537205957	2.20543553101714	0.00493241261571202	0.027907266633319	Intron (ENST00000645527.1/5962, intron 17 of 18)	ZC3H12C
control_d65_vs_control_VPA_high_1B	chr11_110032025_110033013	46.9460278284214	2.55624491010142	7.34120505972033e-08	2.08047686406482e-06	Intron (ENST00000645527.1/5962, intron 17 of 18)	ZC3H12C
control_d65_vs_control_VPA_high_1B	chr11_110130599_110131136	66.4652397465418	3.13812594788794	6.90284077328998e-15	7.34678962515891e-13	Promoter (<=1kb)	ZC3H12C
control_d65_vs_control_VPA_high_1B	chr11_110131605_110132119	29.7980856535421	2.75585131973223	5.22627294269044e-06	9.23122989574312e-05	Promoter (<=1kb)	ZC3H12C
control_d65_vs_control_VPA_high_1B	chr11_110134006_110134635	49.2278085608193	3.39650780817184	1.00593973833331e-10	5.20857306695561e-09	Promoter (1-2kb)	ZC3H12C
control_d65_vs_control_VPA_high_1B	chr11_110173641_110174937	49.2454056901287	1.77427386768954	4.3314101203366e-06	7.83244994420011e-05	3' UTR	ZC3H12C
control_d65_vs_control_VPA_high_1B	chr11_110175069_110176122	42.40789125764	2.83024333922522	6.69945275791663e-11	3.58149480609875e-09	3' UTR	ZC3H12C
control_d65_vs_control_VPA_high_1B	chr11_111694068_111695371	42.7925705097238	2.18225947387791	1.1096304184359e-07	3.01568350911415e-06	Intron (ENST00000304987.4/23235, intron 4 of 14)	SIK2
control_d65_vs_control_VPA_high_1B	chr11_111717421_111718079	20.6489909510877	2.65771215619335	6.19445416026591e-06	0.000107051552581913	Promoter (<=1kb)	SIK2
control_d65_vs_control_VPA_high_1B	chr11_111982736_111984083	43.0826001292501	1.05521431600114	0.00848963880088245	0.0422924714214492	Promoter (<=1kb)	DIXDC1
control_d65_vs_control_VPA_high_1B	chr11_112514048_112514842	34.8169831495194	3.32768336290009	1.38592467485851e-11	8.39752401928097e-10	Intron (ENST00000528496.1/101928823, intron 2 of 2)	LINC02763
control_d65_vs_control_VPA_high_1B	chr11_112877553_112878694	25.5229106276222	1.59847139879516	0.00464924756164351	0.0266730625499579	Distal Intergenic	NCAM1
control_d65_vs_control_VPA_high_1B	chr11_113082229_113083136	26.0698853086932	3.14037814069218	2.34636716928134e-09	9.19251459745027e-08	Intron (ENST00000621518.4/4684, intron 2 of 19)	NCAM1
control_d65_vs_control_VPA_high_1B	chr11_113147053_113147820	23.3512820910951	1.99571653828311	8.11365252715441e-05	0.000987137123392202	Intron (ENST00000621518.4/4684, intron 2 of 19)	NCAM1
control_d65_vs_control_VPA_high_1B	chr11_114182477_114183422	20.3965087323675	1.69113504726742	0.00202972721255378	0.0139388866237339	Promoter (1-2kb)	ZBTB16
control_d65_vs_control_VPA_high_1B	chr11_114228603_114229557	25.4074192539441	1.6799341730268	0.000563637249508247	0.00497962951302725	Intron (ENST00000335953.9/7704, intron 4 of 6)	ZBTB16
control_d65_vs_control_VPA_high_1B	chr11_114243778_114244714	22.5632518201124	2.66764352308975	1.03342764462456e-05	0.000167161365827107	Promoter (2-3kb)	ZBTB16
control_d65_vs_control_VPA_high_1B	chr11_115112549_115113373	36.4498126009689	2.12533521457188	4.33619735590832e-06	7.83826258714998e-05	Distal Intergenic	CADM1
control_d65_vs_control_VPA_high_1B	chr11_115117901_115118591	27.8150366959602	3.3040521955025	6.67100636748945e-08	1.91013851671007e-06	Distal Intergenic	CADM1
control_d65_vs_control_VPA_high_1B	chr11_115664976_115666363	51.4709439783304	2.41299336535593	7.91837114462748e-07	1.75193741864252e-05	Intron (ENST00000539305.1/ENST00000539305.1, intron 1 of 2)	LINC00900
control_d65_vs_control_VPA_high_1B	chr11_117719920_117720633	37.4682863440195	1.54015474611805	0.000953361273732691	0.00763217366666066	Intron (ENST00000651296.2/57453, intron 3 of 32)	DSCAML1
control_d65_vs_control_VPA_high_1B	chr11_118705068_118706244	35.9299974830975	1.41237269812429	0.00116941390802368	0.00898541566207902	Intron (ENST00000646572.1/ENST00000646572.1, intron 2 of 2)	TREH
control_d65_vs_control_VPA_high_1B	chr11_118953159_118953815	21.0071592842776	4.40698923134976	3.6578713073139e-07	8.79274103011933e-06	Promoter (2-3kb)	UPK2
control_d65_vs_control_VPA_high_1B	chr11_119709355_119710433	54.2279260395764	1.94713308827563	7.21513098577384e-07	1.61154902127739e-05	Exon (ENST00000529229.1/ENST00000529229.1, exon 1 of 3)	NECTIN1
control_d65_vs_control_VPA_high_1B	chr11_121389488_121390212	30.0401911709358	2.07736637072576	2.4036485650379e-05	0.000348149187565244	Distal Intergenic	SORL1
control_d65_vs_control_VPA_high_1B	chr11_121578217_121578939	23.6922299135641	3.12403398000266	3.40363431781697e-06	6.34231526191383e-05	Promoter (1-2kb)	SORL1
control_d65_vs_control_VPA_high_1B	chr11_122069710_122070552	21.8830403087843	2.3975911194318	3.6882003404684e-05	0.000503029546436106	Promoter (<=1kb)	MIR100HG
control_d65_vs_control_VPA_high_1B	chr11_122812635_122813832	41.5271020873227	2.78770000233149	1.06087210952547e-10	5.4660276956698e-09	3' UTR	UBASH3B
control_d65_vs_control_VPA_high_1B	chr11_124842841_124843677	35.5055708626159	1.1890588998872	0.00357288420510655	0.0217312028909586	Distal Intergenic	ROBO3
control_d65_vs_control_VPA_high_1B	chr11_126440755_126441741	25.7923575931636	1.26666634989343	0.00668528883826954	0.0352282735594417	Promoter (<=1kb)	KIRREL3
control_d65_vs_control_VPA_high_1B	chr11_126700529_126701750	51.8424629322504	2.46840240421004	3.04162636954628e-09	1.16850269852298e-07	Intron (ENST00000525144.7/84623, intron 1 of 16)	LOC101929427
control_d65_vs_control_VPA_high_1B	chr11_126995994_126996794	21.5816375511629	2.06187293230883	0.00132183477719065	0.00993112258296636	Intron (ENST00000525144.7/84623, intron 1 of 16)	KIRREL3
control_d65_vs_control_VPA_high_1B	chr11_128870770_128872551	27.1490326115575	1.79484159197394	0.00102147000754579	0.00806503327488206	Distal Intergenic	KCNJ1
control_d65_vs_control_VPA_high_1B	chr11_129252185_129253205	26.1636495673674	1.63454915802913	0.00999853329261263	0.0479034709130253	Intron (ENST00000525234.1/9743, intron 1 of 6)	ARHGAP32
control_d65_vs_control_VPA_high_1B	chr11_130580086_130580869	24.0594558291749	1.64626269991218	0.00207634229185845	0.014200207173009	Distal Intergenic	MIR8052
control_d65_vs_control_VPA_high_1B	chr11_131584427_131585722	20.5249805154343	2.15091048827592	0.000214787220117975	0.00224290063811618	Promoter (2-3kb)	NTM
control_d65_vs_control_VPA_high_1B	chr11_132992800_132993838	27.6680879452757	2.66755223817007	8.92669383364789e-08	2.48360182688398e-06	Intron (ENST00000524381.5/4978, intron 1 of 7)	OPCML
control_d65_vs_control_VPA_high_1B	chr11_133934683_133935272	21.0743213826942	2.51440010260266	2.20869530696414e-05	0.000323650819363476	Promoter (2-3kb)	IGSF9B
control_d65_vs_control_VPA_high_1B	chr11_133946519_133947715	56.5885848796225	1.64921199182217	6.78689575921206e-07	1.52428976762673e-05	Promoter (<=1kb)	IGSF9B
control_d65_vs_control_VPA_high_1B	chr11_134026539_134027368	41.5724835745701	1.81416913384787	2.68637956967225e-05	0.000382787006215786	Exon (ENST00000664263.1/ENST00000664263.1, exon 1 of 2)	LINC02731
control_d65_vs_control_VPA_high_1B	chr11_134124671_134125389	20.3641904842518	2.26057147008006	0.00104239666597693	0.00819552773716574	Promoter (<=1kb)	JAM3
control_d65_vs_control_VPA_high_1B	chr11_134685546_134686798	24.5161857500904	3.06318900626392	2.0023691581521e-07	5.11290229538862e-06	Exon (ENST00000650618.1/ENST00000650618.1, exon 5 of 5)	LINC02714
control_d65_vs_control_VPA_high_1B	chr12_1644194_1645147	24.4686728900551	1.32364965731081	0.00406847424124306	0.0240691496348184	Promoter (<=1kb)	WNT5B
control_d65_vs_control_VPA_high_1B	chr12_1837681_1838933	27.3494472503462	1.3396349615462	0.00178133561265597	0.0125981670989234	Intron (ENST00000537784.5/93589, intron 4 of 14)	LRTM2
control_d65_vs_control_VPA_high_1B	chr12_2197943_2198859	31.3102054276042	3.003652129185	2.37041299882342e-05	0.000343834933903408	Intron (ENST00000327702.12/775, intron 3 of 47)	CACNA1C-AS4
control_d65_vs_control_VPA_high_1B	chr12_2213132_2214045	31.4100348777098	2.30690125289189	1.33158650519591e-05	0.000208553145399735	Intron (ENST00000327702.12/775, intron 3 of 47)	CACNA1C-AS4
control_d65_vs_control_VPA_high_1B	chr12_2824917_2825677	20.1776174212536	2.74203092166998	0.0020355201920856	0.0139728928447485	Promoter (1-2kb)	ITFG2
control_d65_vs_control_VPA_high_1B	chr12_2998561_2999727	25.4151240038768	1.42919221171374	0.00517395756873177	0.0289591123510895	Intron (ENST00000358409.6/7004, intron 3 of 11)	TEAD4
control_d65_vs_control_VPA_high_1B	chr12_3035933_3036661	23.121509657249	2.46771438928646	0.000220864433529834	0.00229338688230223	Intron (ENST00000358409.6/7004, intron 9 of 11)	TEAD4
control_d65_vs_control_VPA_high_1B	chr12_3336423_3337381	52.9230823096942	1.25886745510768	0.00375455482323671	0.0226041946595747	Promoter (<=1kb)	LOC100128253
control_d65_vs_control_VPA_high_1B	chr12_3579443_3580511	24.4036239550385	2.33142788395469	0.00010176307729637	0.00119526646280474	Intron (ENST00000452611.6/56341, intron 7 of 9)	PRMT8
control_d65_vs_control_VPA_high_1B	chr12_3604391_3606021	36.0096582680191	1.57033896128638	0.00146094915164251	0.0107470522743765	Downstream (<1kb)	CRACR2A
control_d65_vs_control_VPA_high_1B	chr12_3881121_3882557	34.2558583012355	1.29968269752165	0.00317595877668912	0.0198269659995574	Intron (ENST00000537149.1/ENST00000537149.1, intron 1 of 1)	PARP11
control_d65_vs_control_VPA_high_1B	chr12_3920270_3921536	79.5992921884154	1.47467050853264	9.64237580114768e-05	0.00114251607611483	Distal Intergenic	PARP11
control_d65_vs_control_VPA_high_1B	chr12_3930084_3930742	27.1783428789327	1.62349252838289	0.00536573350085467	0.0297874152363491	Distal Intergenic	PARP11
control_d65_vs_control_VPA_high_1B	chr12_4293725_4294612	30.440634603198	3.37285645041725	3.45561748540475e-07	8.34278216356418e-06	Intron (ENST00000261254.8/894, intron 4 of 4)	TIGAR
control_d65_vs_control_VPA_high_1B	chr12_4561886_4562736	44.3829407838971	1.10702184168904	0.00762919795682871	0.0390011564534421	Promoter (<=1kb)	DYRK4
control_d65_vs_control_VPA_high_1B	chr12_4579319_4580898	35.5934467041246	1.2611329853349	0.0078326028562703	0.0398051814864136	3' UTR	DYRK4
control_d65_vs_control_VPA_high_1B	chr12_4857505_4858854	39.551708678684	1.13627481873524	0.00178700889767863	0.012629243652875	Exon (ENST00000658418.1/ENST00000658418.1, exon 2 of 2)	KCNA6
control_d65_vs_control_VPA_high_1B	chr12_6084142_6085140	39.754419078522	1.78162661494162	8.32974572631564e-05	0.00100940292724147	Intron (ENST00000261405.9/7450, intron 6 of 51)	VWF
control_d65_vs_control_VPA_high_1B	chr12_6221743_6222743	37.5398324972054	1.92307176249344	0.000836523912305138	0.00686754368760316	Promoter (2-3kb)	CD9
control_d65_vs_control_VPA_high_1B	chr12_7439631_7440553	45.3103961454964	1.13630784429593	0.00687614192740984	0.036012174254826	Exon (ENST00000538078.1/ENST00000538078.1, exon 1 of 1)	CD163L1
control_d65_vs_control_VPA_high_1B	chr12_7935627_7936641	37.2321973589279	1.16812309786374	0.0064834821327396	0.0344076945194236	Promoter (<=1kb)	SLC2A3
control_d65_vs_control_VPA_high_1B	chr12_7960318_7961307	54.975223292864	1.10807696231354	0.00120951298288941	0.00923657581547164	Intron (ENST00000661633.1/ENST00000661633.1, intron 1 of 1)	SLC2A3
control_d65_vs_control_VPA_high_1B	chr12_8692445_8693011	38.2137145314498	1.6389561612167	5.45542489203494e-05	0.000704122454210163	Intron (ENST00000538758.1/57494, intron 1 of 1)	RIMKLB
control_d65_vs_control_VPA_high_1B	chr12_11743288_11744946	24.3136093063065	1.76466576425973	0.000782483180653019	0.00650948302400577	Intron (ENST00000396373.8/2120, intron 1 of 7)	ETV6
control_d65_vs_control_VPA_high_1B	chr12_11821971_11822931	23.3046801488228	1.93511642152405	0.000120737513165987	0.00138142342303776	Intron (ENST00000396373.8/2120, intron 2 of 7)	ETV6
control_d65_vs_control_VPA_high_1B	chr12_11869807_11870791	22.7299087064451	2.47844162485141	8.15265709374299e-06	0.000135965831256529	Exon (ENST00000396373.8/2120, exon 5 of 8)	ETV6
control_d65_vs_control_VPA_high_1B	chr12_12032797_12033770	22.8592209092291	1.40647808803836	0.00430137964174544	0.0251455374212137	Distal Intergenic	BCL2L14
control_d65_vs_control_VPA_high_1B	chr12_12086418_12087871	47.1077480610005	1.5196831780091	0.000143341023030553	0.00160009293185399	Exon (ENST00000589718.5/79370, exon 4 of 7)	BCL2L14
control_d65_vs_control_VPA_high_1B	chr12_12520745_12521875	95.8431769526826	3.93667727519138	5.77557871807574e-20	1.38715483751027e-17	5' UTR	DUSP16
control_d65_vs_control_VPA_high_1B	chr12_12684306_12685866	122.351118357747	2.45692822278414	9.61629987647451e-22	3.07206877432001e-19	Promoter (<=1kb)	GPR19
control_d65_vs_control_VPA_high_1B	chr12_13275458_13276328	29.0709887434531	2.45285498176544	4.90877570838212e-06	8.73310845482502e-05	Intron (ENST00000664966.1/ENST00000664966.1, intron 1 of 3)	EMP1
control_d65_vs_control_VPA_high_1B	chr12_13727523_13728375	31.0218944128349	1.89234634303406	1.65989091058951e-05	0.000252089451060777	Intron (ENST00000609686.3/2904, intron 3 of 12)	GRIN2B
control_d65_vs_control_VPA_high_1B	chr12_13739385_13740480	33.0480701587373	2.16899022963537	2.74153509377124e-06	5.24234105326543e-05	Intron (ENST00000609686.3/2904, intron 3 of 12)	GRIN2B
control_d65_vs_control_VPA_high_1B	chr12_13749226_13749986	28.3490480818766	1.6335876452651	0.00425522461757327	0.0249373755411336	Intron (ENST00000609686.3/2904, intron 3 of 12)	GRIN2B
control_d65_vs_control_VPA_high_1B	chr12_13941074_13942326	29.4146070392871	1.58492435123985	0.00116058944159269	0.00893025017800137	Intron (ENST00000609686.3/2904, intron 1 of 12)	GRIN2B
control_d65_vs_control_VPA_high_1B	chr12_14384790_14385731	51.5087859892548	1.13219310127765	0.0016720061071155	0.0119782839584937	Promoter (<=1kb)	ATF7IP
control_d65_vs_control_VPA_high_1B	chr12_14417689_14418193	20.6290234747124	1.92653282732358	0.00356650395854376	0.0217056418293349	Promoter (<=1kb)	ATF7IP
control_d65_vs_control_VPA_high_1B	chr12_15321970_15323339	61.9070892454863	2.33988747392891	1.00864814822168e-07	2.77184965199062e-06	Promoter (<=1kb)	PTPRO
control_d65_vs_control_VPA_high_1B	chr12_15356612_15357513	47.9537107459255	1.32416261590457	0.000685116326301432	0.0058388826363036	Intron (ENST00000281171.9/5800, intron 1 of 26)	RERG
control_d65_vs_control_VPA_high_1B	chr12_15417346_15418427	23.4539493219074	2.37781852573757	6.48248122597561e-06	0.000111334255403923	Intron (ENST00000281171.9/5800, intron 1 of 26)	RERG
control_d65_vs_control_VPA_high_1B	chr12_16449481_16450872	21.2605351701986	3.73413663452764	1.6142602948276e-09	6.5227179886639e-08	Intron (ENST00000539036.5/4257, intron 4 of 4)	MGST1
control_d65_vs_control_VPA_high_1B	chr12_16603240_16604856	81.7582968846028	2.68045109594086	7.87947462474504e-15	8.32842920755262e-13	Promoter (<=1kb)	LMO3
control_d65_vs_control_VPA_high_1B	chr12_18468267_18469629	28.3510836569464	2.38646155258955	1.01748122780186e-05	0.000164971427439111	Intron (ENST00000433979.5/5288, intron 17 of 31)	PIK3C2G
control_d65_vs_control_VPA_high_1B	chr12_19065721_19067215	59.0737568540718	3.1910043297729	1.46699160369033e-13	1.26871543700327e-11	Distal Intergenic	PLEKHA5
control_d65_vs_control_VPA_high_1B	chr12_19915202_19916666	51.9561731544492	2.18639453383768	7.32874525676828e-08	2.07817361586875e-06	Intron (ENST00000535764.1/ENST00000535764.1, intron 1 of 4)	LINC02398
control_d65_vs_control_VPA_high_1B	chr12_19966988_19967969	55.8783760004693	2.31600022618612	1.08115784458709e-09	4.54884955017007e-08	Intron (ENST00000535764.1/ENST00000535764.1, intron 3 of 4)	LINC02398
control_d65_vs_control_VPA_high_1B	chr12_20587871_20588720	46.1918293561964	1.85387267171114	8.3566666873922e-07	1.83890945740687e-05	Intron (ENST00000359062.3/5139, intron 2 of 15)	PDE3A
control_d65_vs_control_VPA_high_1B	chr12_20592475_20593125	24.8407285020531	3.90344834185991	4.61701191676397e-09	1.71365963530283e-07	Intron (ENST00000359062.3/5139, intron 2 of 15)	PDE3A
control_d65_vs_control_VPA_high_1B	chr12_21910487_21911103	22.4648074691934	1.93285344381447	0.00165141827184285	0.0118687538961959	Promoter (<=1kb)	ABCC9
control_d65_vs_control_VPA_high_1B	chr12_22766676_22767967	47.9344143613887	4.07693354301153	8.27830373000335e-18	1.40088856991617e-15	Intron (ENST00000413794.6/ENST00000413794.6, intron 1 of 3)	ETNK1
control_d65_vs_control_VPA_high_1B	chr12_23006353_23007153	21.6086917532879	2.11835025694217	0.000141627601324736	0.00158389317327803	Intron (ENST00000538317.6/ENST00000538317.6, intron 6 of 11)	LOC101928441
control_d65_vs_control_VPA_high_1B	chr12_23555488_23556289	20.8281203492871	3.01926657822828	2.40487209201093e-05	0.000348280839066553	Intron (ENST00000451604.7/6660, intron 11 of 14)	SOX5
control_d65_vs_control_VPA_high_1B	chr12_23640619_23641343	44.6866912266949	2.02404592472705	2.72685573936881e-05	0.000387695445560384	Exon (ENST00000451604.7/6660, exon 8 of 15)	SOX5
control_d65_vs_control_VPA_high_1B	chr12_23702615_23703544	22.2726777056362	3.56513613629539	2.67584232438513e-09	1.03717375850064e-07	Intron (ENST00000451604.7/6660, intron 6 of 14)	SOX5
control_d65_vs_control_VPA_high_1B	chr12_23757447_23758043	39.4844158059301	1.47302138325123	0.000899665770468258	0.00728244498638751	Intron (ENST00000451604.7/6660, intron 3 of 14)	SOX5
control_d65_vs_control_VPA_high_1B	chr12_23760435_23761173	20.8849110280322	1.68489491458118	0.00105259144737969	0.00826264598028556	Intron (ENST00000451604.7/6660, intron 3 of 14)	SOX5
control_d65_vs_control_VPA_high_1B	chr12_23830105_23830900	20.5852263250721	2.9573849782138	7.50238807631215e-06	0.000126539327259115	Intron (ENST00000451604.7/6660, intron 3 of 14)	SOX5
control_d65_vs_control_VPA_high_1B	chr12_23856991_23857868	37.5408916537495	3.15786933367551	6.30164788129028e-11	3.38998762627067e-09	Intron (ENST00000451604.7/6660, intron 2 of 14)	SOX5
control_d65_vs_control_VPA_high_1B	chr12_23888108_23889492	28.1585730387937	2.76422249686615	3.99540231803577e-08	1.20366853633241e-06	Intron (ENST00000451604.7/6660, intron 2 of 14)	SOX5
control_d65_vs_control_VPA_high_1B	chr12_23895592_23896465	87.1589934126178	2.26592163229376	1.01222544826987e-14	1.0547992379028e-12	Promoter (<=1kb)	SOX5
control_d65_vs_control_VPA_high_1B	chr12_24014577_24016181	105.848516037655	2.85541790542273	3.43495277613166e-17	5.244103050654e-15	Intron (ENST00000646273.1/6660, intron 5 of 16)	SOX5
control_d65_vs_control_VPA_high_1B	chr12_24133222_24133906	21.4601377506285	1.89174699888704	0.00296383708847127	0.0188066293684235	Intron (ENST00000646273.1/6660, intron 5 of 16)	MIR920
control_d65_vs_control_VPA_high_1B	chr12_24229550_24230781	53.8249116039473	2.64600726722798	2.28526033704789e-09	8.97473418339537e-08	Exon (ENST00000657983.1/101928471, exon 4 of 6)	SOX5-AS1
control_d65_vs_control_VPA_high_1B	chr12_24256167_24257273	38.0742982773837	2.46680641217454	3.60000471194011e-07	8.66513570763601e-06	Intron (ENST00000668875.1/101928471, intron 5 of 6)	SOX5-AS1
control_d65_vs_control_VPA_high_1B	chr12_24281144_24281929	21.4765282735959	4.23254085366576	7.59601664712521e-09	2.69149579548138e-07	Intron (ENST00000646273.1/6660, intron 3 of 16)	SOX5-AS1
control_d65_vs_control_VPA_high_1B	chr12_24379400_24380698	48.8967615654276	1.79482856416378	1.09427862385735e-06	2.3352967193177e-05	Intron (ENST00000646273.1/6660, intron 2 of 16)	SOX5
control_d65_vs_control_VPA_high_1B	chr12_24395831_24396929	24.931575419822	2.51039111113975	1.21187757805968e-06	2.55670385941248e-05	Intron (ENST00000646273.1/6660, intron 2 of 16)	SOX5
control_d65_vs_control_VPA_high_1B	chr12_24500308_24501392	24.8512305436154	2.42882611360263	0.000154421785296607	0.00170152283842228	Intron (ENST00000646273.1/6660, intron 1 of 16)	SOX5
control_d65_vs_control_VPA_high_1B	chr12_24947702_24948705	24.5500549416939	1.70023026246809	0.000836744099023944	0.00686878558573658	Promoter (<=1kb)	BCAT1
control_d65_vs_control_VPA_high_1B	chr12_26205581_26206623	31.221718270188	1.66176329135409	0.000387584137949549	0.00365743657106229	Intron (ENST00000538142.5/8082, intron 1 of 2)	SSPN
control_d65_vs_control_VPA_high_1B	chr12_29065637_29066694	51.9513769205768	2.68215042212108	9.25112484869928e-08	2.56562984709071e-06	Distal Intergenic	FAR2
control_d65_vs_control_VPA_high_1B	chr12_31353605_31354436	31.0256246410138	2.04899541391298	2.04180387420847e-05	0.000302037277462127	Distal Intergenic	LINC02387
control_d65_vs_control_VPA_high_1B	chr12_32249611_32250490	20.1983234349982	2.71366776346247	1.57620561751408e-05	0.000241143733713708	Intron (ENST00000652176.1/636, intron 2 of 9)	BICD1
control_d65_vs_control_VPA_high_1B	chr12_32270645_32271820	41.1624419911816	1.82684794090119	3.24711498869729e-06	6.07907010271271e-05	Intron (ENST00000652176.1/636, intron 2 of 9)	BICD1
control_d65_vs_control_VPA_high_1B	chr12_32454749_32455415	30.935491795907	2.32824867799042	0.00056724894896251	0.00500525889606412	Intron (ENST00000534526.6/121512, intron 1 of 16)	FGD4
control_d65_vs_control_VPA_high_1B	chr12_32501711_32502550	82.5762460942819	1.09846211283442	9.99602307121979e-05	0.00117762969987316	Promoter (<=1kb)	FGD4
control_d65_vs_control_VPA_high_1B	chr12_32502717_32503474	20.0724116716215	2.2719878238828	0.000267404154550788	0.00269026671678906	Promoter (<=1kb)	FGD4
control_d65_vs_control_VPA_high_1B	chr12_32549301_32550372	21.489445380731	1.4641777546604	0.00774217805456308	0.0394462052462539	Intron (ENST00000534526.6/121512, intron 1 of 16)	FGD4
control_d65_vs_control_VPA_high_1B	chr12_32561804_32562861	45.6339833540139	2.01208471964235	0.000173656326320445	0.00187641608359049	Intron (ENST00000534526.6/121512, intron 1 of 16)	FGD4
control_d65_vs_control_VPA_high_1B	chr12_33438801_33440208	66.2542507267025	2.09211984630101	4.84183661890463e-07	1.13037546286334e-05	Promoter (<=1kb)	SYT10
control_d65_vs_control_VPA_high_1B	chr12_39294393_39295317	25.0577512778644	2.71410209704332	2.11419611545122e-07	5.37161023235711e-06	3' UTR	KIF21A
control_d65_vs_control_VPA_high_1B	chr12_39352397_39353178	23.1673198171947	2.5375123720945	5.34622318382331e-05	0.000692134177687	Intron (ENST00000636569.1/55605, intron 10 of 36)	KIF21A
control_d65_vs_control_VPA_high_1B	chr12_39391932_39392746	22.7271590107122	3.1000823292717	7.77451019559419e-05	0.00095156720663776	Intron (ENST00000636569.1/55605, intron 1 of 36)	KIF21A
control_d65_vs_control_VPA_high_1B	chr12_39393740_39394695	45.6366162727978	4.47500207134603	5.2522312141798e-13	4.10431706633432e-11	Intron (ENST00000636569.1/55605, intron 1 of 36)	KIF21A
control_d65_vs_control_VPA_high_1B	chr12_39502341_39503231	21.8965269961026	2.91871091981749	2.89247152710554e-06	5.49983430982812e-05	Distal Intergenic	KIF21A
control_d65_vs_control_VPA_high_1B	chr12_39574367_39575952	21.6751679891243	2.47322537676194	2.85786653169115e-05	0.00040307362503644	Intron (ENST00000308666.4/225, intron 8 of 9)	ABCD2
control_d65_vs_control_VPA_high_1B	chr12_40063188_40064236	24.1443554631899	2.68332626015199	5.13827892336431e-05	0.000668462048068829	Intron (ENST00000280871.9/114134, intron 1 of 9)	SLC2A13
control_d65_vs_control_VPA_high_1B	chr12_41437384_41438073	24.4894351418963	1.42807484320704	0.00196647154819093	0.0135925186284906	Promoter (<=1kb)	PDZRN4
control_d65_vs_control_VPA_high_1B	chr12_41604985_41607555	53.595752287251	1.18671793134257	0.000388903651400473	0.00366659039406351	Distal Intergenic	PDZRN4
control_d65_vs_control_VPA_high_1B	chr12_41794247_41795706	31.549425815168	1.90567334453735	7.56825633362561e-06	0.000127456418609693	Distal Intergenic	LINC02400
control_d65_vs_control_VPA_high_1B	chr12_42446587_42447678	31.3713668121346	1.21259141461221	0.00397096321576722	0.0236212590478137	3' UTR	PRICKLE1
control_d65_vs_control_VPA_high_1B	chr12_44127984_44129202	38.3095486504256	1.76415118756407	5.9516510354573e-05	0.000758494966957084	Intron (ENST00000266534.8/84216, intron 3 of 7)	TMEM117
control_d65_vs_control_VPA_high_1B	chr12_44617883_44619835	26.8601321638789	1.43081607680276	0.00461955765437557	0.0265462767416879	Intron (ENST00000395487.6/4753, intron 13 of 19)	NELL2
control_d65_vs_control_VPA_high_1B	chr12_44654096_44655749	41.5832562645656	1.33066377732963	0.00205311551802348	0.014070903360811	Intron (ENST00000395487.6/4753, intron 13 of 19)	NELL2
control_d65_vs_control_VPA_high_1B	chr12_44775709_44776419	26.5072229166054	2.19336457192616	0.0016838940099306	0.0120435395846593	Promoter (<=1kb)	NELL2
control_d65_vs_control_VPA_high_1B	chr12_44875074_44877170	146.375122145622	1.35895029764842	5.15537483675609e-09	1.89263969099075e-07	Promoter (<=1kb)	NELL2
control_d65_vs_control_VPA_high_1B	chr12_45034396_45035463	31.2898965386407	1.40874577910289	0.00753511251687571	0.0386311380240492	Intron (ENST00000332700.6/440097, intron 2 of 3)	DBX2
control_d65_vs_control_VPA_high_1B	chr12_47575967_47577134	48.9223731361054	3.29838791024455	9.49628403395647e-12	5.91392139029393e-10	Distal Intergenic	RPAP3
control_d65_vs_control_VPA_high_1B	chr12_47590994_47592327	20.3870712094073	1.66330533322358	0.0016479053966628	0.0118476858516816	Distal Intergenic	RPAP3
control_d65_vs_control_VPA_high_1B	chr12_47778868_47779999	42.101901360271	1.12771624605544	0.00378919964859527	0.0227655754414971	Promoter (<=1kb)	SLC48A1
control_d65_vs_control_VPA_high_1B	chr12_49232851_49233576	24.5503480776012	2.00491885044443	0.00352517791578963	0.021518934241847	Exon (ENST00000549023.2/ENST00000549023.2, exon 2 of 2)	TUBA1C
control_d65_vs_control_VPA_high_1B	chr12_49279600_49280306	20.6765423759443	2.28481766417842	7.02347968022779e-05	0.000872718681253312	Distal Intergenic	TUBA1C
control_d65_vs_control_VPA_high_1B	chr12_49903505_49904552	42.0392037421458	1.58482436216913	1.27653352059431e-05	0.000201020500194639	Promoter (<=1kb)	LINC02395
control_d65_vs_control_VPA_high_1B	chr12_50055773_50056871	36.9900044179823	1.530700626246	0.000143152526506751	0.00159843631597014	Promoter (<=1kb)	ASIC1
control_d65_vs_control_VPA_high_1B	chr12_50621157_50622392	27.889038770681	1.32913483079649	0.00368760060458787	0.0222895218351174	Intron (ENST00000549620.5/57609, intron 1 of 7)	DIP2B
control_d65_vs_control_VPA_high_1B	chr12_51828733_51829689	41.2738596333024	2.95308171274004	1.93042045676203e-07	4.94820105919613e-06	Promoter (2-3kb)	FIGNL2
control_d65_vs_control_VPA_high_1B	chr12_53737002_53737905	26.1551333910402	2.71731534874278	0.00329717040882213	0.0204205962754235	Distal Intergenic	CALCOCO1
control_d65_vs_control_VPA_high_1B	chr12_54565352_54566773	27.1308080257789	1.30715279031299	0.00663488654974015	0.0350330585936457	Intron (ENST00000243052.8/5153, intron 2 of 15)	PDE1B
control_d65_vs_control_VPA_high_1B	chr12_55039427_55040296	25.3508260568827	1.69558952760402	0.00571536544509063	0.0312566250587648	Distal Intergenic	NEUROD4
control_d65_vs_control_VPA_high_1B	chr12_57549606_57550620	48.7911816905385	1.97064632039071	2.11089487761019e-06	4.18288717964295e-05	Promoter (<=1kb)	KIF5A
control_d65_vs_control_VPA_high_1B	chr12_57738484_57739214	22.6640092167234	1.28947503479342	0.0104332657367522	0.0494291368576326	Promoter (<=1kb)	AGAP2
control_d65_vs_control_VPA_high_1B	chr12_57754050_57755095	34.3250583201521	2.03548379822642	7.53200420778084e-06	0.000126953150486537	Promoter (<=1kb)	MARCHF9
control_d65_vs_control_VPA_high_1B	chr12_57868644_57869888	65.1054796877932	1.73011153635298	1.1113771356777e-08	3.79624034422217e-07	Promoter (2-3kb)	LOC283387
control_d65_vs_control_VPA_high_1B	chr12_58131792_58132719	22.2870153125533	2.03526457781335	0.00519466618173739	0.0290453604144492	Distal Intergenic	LINC02403
control_d65_vs_control_VPA_high_1B	chr12_58502155_58503294	36.9895870884536	1.75171699510617	6.85509142068563e-05	0.000855367460157735	Distal Intergenic	LOC100506869
control_d65_vs_control_VPA_high_1B	chr12_58761132_58761915	28.8548705728409	2.3229565011074	8.16133785975552e-06	0.000136065071254564	Intron (ENST00000546977.5/100506869, intron 1 of 7)	LINC02388
control_d65_vs_control_VPA_high_1B	chr12_62652997_62654386	37.9424754447913	1.86475056962319	0.0020112307554291	0.0138423838617515	Intron (ENST00000228705.7/57460, intron 9 of 9)	LINC01465
control_d65_vs_control_VPA_high_1B	chr12_62659280_62660005	31.0149333367147	1.84371878834051	0.00461481776737804	0.0265263429653664	Intron (ENST00000228705.7/57460, intron 9 of 9)	LINC01465
control_d65_vs_control_VPA_high_1B	chr12_62711405_62712444	91.4161474380802	1.80663731075525	1.23237882411544e-07	3.31002141029529e-06	Intron (ENST00000228705.7/57460, intron 6 of 9)	PPM1H
control_d65_vs_control_VPA_high_1B	chr12_62714983_62715858	58.9778751651156	2.53750887750038	9.97095284428792e-08	2.74274812432375e-06	Intron (ENST00000228705.7/57460, intron 6 of 9)	PPM1H
control_d65_vs_control_VPA_high_1B	chr12_62716846_62718162	29.434288835591	2.15603939106306	2.23198932334027e-05	0.000326488218117544	Promoter (2-3kb)	PPM1H
control_d65_vs_control_VPA_high_1B	chr12_63892741_63893718	29.2997085454886	3.43816361355509	2.50694796682602e-08	7.95020759457366e-07	Intron (ENST00000355086.8/57522, intron 1 of 21)	SRGAP1
control_d65_vs_control_VPA_high_1B	chr12_63915278_63916322	36.701315005954	2.71828846164887	2.76428609251386e-05	0.000392066435715594	Intron (ENST00000355086.8/57522, intron 1 of 21)	SRGAP1
control_d65_vs_control_VPA_high_1B	chr12_64039091_64039952	21.1162652516927	2.21494630360009	8.39750994457086e-05	0.00101658469509347	Promoter (2-3kb)	SRGAP1
control_d65_vs_control_VPA_high_1B	chr12_64450769_64451558	38.2938831822334	1.41854712744565	0.000485401645450211	0.00440833149949512	Promoter (<=1kb)	TBK1
control_d65_vs_control_VPA_high_1B	chr12_64824235_64826081	57.7920896959364	1.29390519509516	6.49563659866923e-05	0.000817061568272537	Promoter (<=1kb)	TBC1D30
control_d65_vs_control_VPA_high_1B	chr12_65845624_65846583	24.9877738140561	2.22364005592814	0.00132625168047527	0.00995717714281498	Intron (ENST00000403681.6/8091, intron 3 of 4)	HMGA2
control_d65_vs_control_VPA_high_1B	chr12_65895728_65897162	54.4754989451589	1.85470394240523	5.39106556630752e-07	1.24327551640576e-05	Intron (ENST00000403681.6/8091, intron 3 of 4)	HMGA2-AS1
control_d65_vs_control_VPA_high_1B	chr12_66059194_66060205	21.8872696287298	2.04537033767816	0.000171235513819766	0.00185446377671077	Distal Intergenic	LINC02425
control_d65_vs_control_VPA_high_1B	chr12_66678750_66679868	25.3918527184823	2.08374800693218	1.09461830957743e-05	0.000175917269865384	Promoter (<=1kb)	GRIP1
control_d65_vs_control_VPA_high_1B	chr12_66803753_66805140	46.3477394564575	2.45185607132114	1.79335873746576e-10	8.86434145496774e-09	Promoter (<=1kb)	GRIP1
control_d65_vs_control_VPA_high_1B	chr12_67482890_67483710	23.9277080246761	2.62473996072182	7.87085485368456e-06	0.000131850708543076	Intron (ENST00000650195.1/100507175, intron 3 of 4)	LINC02408
control_d65_vs_control_VPA_high_1B	chr12_67772589_67773298	59.3183944120393	1.99607660923651	1.41101369453281e-10	7.10123544434078e-09	Distal Intergenic	LINC02421
control_d65_vs_control_VPA_high_1B	chr12_67821758_67823282	32.9153273157638	2.56881560941443	6.43552301413463e-07	1.45370625583647e-05	Distal Intergenic	LINC02421
control_d65_vs_control_VPA_high_1B	chr12_69933020_69933696	32.1700395622382	1.87587718802135	0.00178232538473811	0.0126037401967365	Promoter (<=1kb)	MYRFL
control_d65_vs_control_VPA_high_1B	chr12_71456096_71457699	36.9469296019516	2.1460171901042	2.15837900803369e-05	0.000317218643381341	Intron (ENST00000266674.10/8549, intron 1 of 17)	TSPAN8
control_d65_vs_control_VPA_high_1B	chr12_71556420_71557374	20.3406503195633	2.2711470129698	0.000184323885903094	0.0019709397285436	Exon (ENST00000266674.10/8549, exon 6 of 18)	LGR5
control_d65_vs_control_VPA_high_1B	chr12_71947454_71948266	49.1138274532154	2.61908812669843	1.36701269725278e-08	4.60162973905021e-07	Intron (ENST00000333850.4/121278, intron 4 of 10)	TPH2
control_d65_vs_control_VPA_high_1B	chr12_75605955_75607697	21.1576392933503	2.90397334455866	4.15961105232802e-06	7.55812437186566e-05	Intron (ENST00000552856.1/ENST00000552856.1, intron 4 of 4)	KRR1
control_d65_vs_control_VPA_high_1B	chr12_75953164_75954558	32.7189189848173	1.39045264112638	0.00100632107385104	0.00797606778211246	Intron (ENST00000552856.1/ENST00000552856.1, intron 1 of 4)	PHLDA1
control_d65_vs_control_VPA_high_1B	chr12_76156353_76157253	20.6278212920315	2.4011773809778	8.70845738230003e-06	0.000144006316493736	Distal Intergenic	NAP1L1
control_d65_vs_control_VPA_high_1B	chr12_76865998_76867171	61.4155454496681	1.5451088074731	2.19947054801046e-05	0.000322464996590199	Promoter (1-2kb)	CSRP2
control_d65_vs_control_VPA_high_1B	chr12_77162961_77164432	27.952645766237	2.39923536039961	7.15961467431405e-07	1.6005837690544e-05	Exon (ENST00000667988.1/ENST00000667988.1, exon 2 of 2)	E2F7
control_d65_vs_control_VPA_high_1B	chr12_77318276_77319739	41.0258981731355	2.15477902489107	2.57225476259747e-06	4.95955796406573e-05	Distal Intergenic	NAV3
control_d65_vs_control_VPA_high_1B	chr12_77349612_77350349	23.1353693021148	1.67766669087725	0.00407176673051184	0.0240829103566524	Intron (ENST00000550042.2/89795, intron 1 of 8)	NAV3
control_d65_vs_control_VPA_high_1B	chr12_77392580_77393413	28.6966336561639	2.97924536928856	6.18274569223024e-09	2.23360931997704e-07	Intron (ENST00000550042.2/89795, intron 1 of 8)	NAV3
control_d65_vs_control_VPA_high_1B	chr12_78863412_78865495	157.570505016789	1.27762713103168	9.00473304514456e-10	3.86283088792207e-08	Promoter (<=1kb)	SYT1
control_d65_vs_control_VPA_high_1B	chr12_79381213_79382333	29.0355479012591	3.21593203363445	1.57284855346351e-08	5.22655555490477e-07	Intron (ENST00000393240.7/6857, intron 10 of 11)	MIR1252
control_d65_vs_control_VPA_high_1B	chr12_79423980_79424704	26.9943092438037	2.37378208396	5.4139469857092e-07	1.24811920413228e-05	Intron (ENST00000393240.7/6857, intron 10 of 11)	MIR1252
control_d65_vs_control_VPA_high_1B	chr12_79522143_79523315	40.1375865147898	2.36567633388165	4.6679681476459e-08	1.38535176173979e-06	Distal Intergenic	PAWR
control_d65_vs_control_VPA_high_1B	chr12_80707894_80708984	25.3914339631286	2.45850241954536	0.00055556928039043	0.00491962125838266	Promoter (<=1kb)	MYF6
control_d65_vs_control_VPA_high_1B	chr12_80846825_80847489	21.3245073262022	4.99438632605909	9.41501965720743e-08	2.6070933582243e-06	Intron (ENST00000552864.5/8825, intron 3 of 5)	MIR617
control_d65_vs_control_VPA_high_1B	chr12_80892596_80893791	31.9939855139455	2.46479028800618	3.91456069440856e-06	7.16445112181022e-05	Intron (ENST00000552864.5/8825, intron 1 of 5)	LIN7A
control_d65_vs_control_VPA_high_1B	chr12_81206141_81206974	23.3343722007869	3.24083569546167	2.72004696871432e-07	6.72909509835349e-06	Intron (ENST00000261206.7/79611, intron 9 of 15)	ACSS3
control_d65_vs_control_VPA_high_1B	chr12_82277252_82278301	23.2261985953358	4.29362749216253	6.59655318130856e-08	1.89153621993268e-06	Intron (ENST00000552377.5/29080, intron 3 of 3)	CCDC59
control_d65_vs_control_VPA_high_1B	chr12_82329347_82330075	26.1696548593788	2.04596286733365	0.00512913302916392	0.0287607142649071	Intron (ENST00000552377.5/29080, intron 2 of 3)	CCDC59
control_d65_vs_control_VPA_high_1B	chr12_82698904_82699751	22.2101114878314	2.06833961855207	0.000425669107747462	0.00395283150663929	Intron (ENST00000551915.5/160335, intron 1 of 7)	TMTC2
control_d65_vs_control_VPA_high_1B	chr12_82781214_82782221	45.8228462666999	1.48500610887728	0.00210368940591102	0.0143438237102564	Intron (ENST00000551915.5/160335, intron 1 of 7)	TMTC2
control_d65_vs_control_VPA_high_1B	chr12_82793616_82794482	28.638287489777	2.93830402222429	1.08873415838587e-07	2.9677943325255e-06	Intron (ENST00000551915.5/160335, intron 1 of 7)	TMTC2
control_d65_vs_control_VPA_high_1B	chr12_84874497_84875682	20.8104912130397	2.29816067053643	4.77432711917733e-05	0.000628794274510785	Promoter (<=1kb)	SLC6A15
control_d65_vs_control_VPA_high_1B	chr12_84986464_84987075	22.5424616479252	3.56882650769849	1.09002448551002e-08	3.7303351259825e-07	Distal Intergenic	TSPAN19
control_d65_vs_control_VPA_high_1B	chr12_85036008_85036855	58.7371172852247	1.30032215001416	0.000204585843463592	0.00215363413165196	Promoter (<=1kb)	TSPAN19
control_d65_vs_control_VPA_high_1B	chr12_87870600_87871470	32.329131885769	1.86743322252948	3.73363541470853e-05	0.000508426316948212	Distal Intergenic	LINC02258
control_d65_vs_control_VPA_high_1B	chr12_89072153_89073472	26.4634890209749	2.17879493838475	1.15162174165344e-05	0.000184084025107567	Intron (ENST00000549278.2/728084, intron 2 of 6)	LINC02458
control_d65_vs_control_VPA_high_1B	chr12_89098222_89099145	33.7636901788331	2.89480433666632	4.65057510959907e-09	1.72414644931772e-07	Intron (ENST00000549278.2/728084, intron 2 of 6)	LINC02458
control_d65_vs_control_VPA_high_1B	chr12_89316291_89317487	50.7064059851306	1.65932590337646	0.000243756216201167	0.00249004346890727	Distal Intergenic	LINC02458
control_d65_vs_control_VPA_high_1B	chr12_89345632_89347022	148.276990238809	1.61921052581631	2.11200219551821e-08	6.82254399072717e-07	Downstream (<1kb)	DUSP6
control_d65_vs_control_VPA_high_1B	chr12_89349817_89350143	21.8187864432239	1.99972517667684	0.0034413043925229	0.0211171047661106	Promoter (1-2kb)	DUSP6
control_d65_vs_control_VPA_high_1B	chr12_89461089_89462182	28.5200590028711	1.32048149929024	0.00637556489648549	0.0339794278122606	Promoter (<=1kb)	POC1B
control_d65_vs_control_VPA_high_1B	chr12_91910870_91911688	22.1149238019782	1.91548915952526	0.00861363733880924	0.042744620471043	Distal Intergenic	LINC01619
control_d65_vs_control_VPA_high_1B	chr12_92038421_92039673	26.4337449503649	1.8195980940185	0.000592628839727993	0.00518422804477868	Intron (ENST00000551843.5/256021, intron 1 of 5)	LINC01619
control_d65_vs_control_VPA_high_1B	chr12_92107155_92108386	59.0002346827824	2.73475030128745	1.11056423417795e-12	8.16322042132881e-11	Intron (ENST00000551843.5/256021, intron 1 of 5)	LINC01619
control_d65_vs_control_VPA_high_1B	chr12_92144074_92144864	67.9162158139575	1.17272321851525	7.54450939646417e-05	0.000927573559977518	Promoter (<=1kb)	BTG1
control_d65_vs_control_VPA_high_1B	chr12_92465957_92467225	39.2454986858383	1.64344547363736	2.50357833943994e-05	0.000360371382521477	Promoter (<=1kb)	LINC02397
control_d65_vs_control_VPA_high_1B	chr12_93102158_93103430	25.3622421970141	2.90856602030373	1.5032351171391e-07	3.94970222302901e-06	Intron (ENST00000657309.1/ENST00000657309.1, intron 4 of 4)	LOC643339
control_d65_vs_control_VPA_high_1B	chr12_93318473_93320160	47.8111190698994	1.98530565263022	3.84457323007267e-08	1.16332770965705e-06	Intron (ENST00000548890.2/643339, intron 2 of 2)	LOC643339
control_d65_vs_control_VPA_high_1B	chr12_93857756_93858704	33.7191839491289	2.68717493409981	1.0764762524791e-06	2.30001323715646e-05	Intron (ENST00000548483.5/8738, intron 2 of 2)	CRADD
control_d65_vs_control_VPA_high_1B	chr12_93990929_93991768	23.8190491003159	2.23195205755064	4.85033867929275e-05	0.000636911675358864	Distal Intergenic	LOC105369911
control_d65_vs_control_VPA_high_1B	chr12_94164497_94165761	54.1166473724068	2.56850510336975	3.4656701642878e-10	1.61493100647526e-08	Intron (ENST00000258526.9/10154, intron 1 of 30)	PLXNC1
control_d65_vs_control_VPA_high_1B	chr12_94186808_94187822	41.6809624954807	1.59548948609064	0.000122923466648409	0.00140265033671973	Exon (ENST00000669622.1/ENST00000669622.1, exon 1 of 2)	PLXNC1
control_d65_vs_control_VPA_high_1B	chr12_94534901_94535888	26.4876441184364	2.32356467606819	5.0127376548961e-05	0.000654228886050096	Distal Intergenic	MIR5700
control_d65_vs_control_VPA_high_1B	chr12_95094272_95095096	20.8776262021588	2.8893050789446	0.00113674044868936	0.0087882358535749	Promoter (2-3kb)	FGD6
control_d65_vs_control_VPA_high_1B	chr12_95545418_95546161	40.5387538999472	3.9633208199334	5.70686484781858e-08	1.65861011802485e-06	Promoter (2-3kb)	USP44
control_d65_vs_control_VPA_high_1B	chr12_96070532_96071455	30.9277610769249	1.63572434913479	0.000308308313906311	0.00302893051815915	Distal Intergenic	LTA4H
control_d65_vs_control_VPA_high_1B	chr12_96224214_96225474	20.2047898702745	2.60073575931158	1.58690792402888e-05	0.000242557695923525	Intron (ENST00000228741.8/2004, intron 2 of 4)	ELK3
control_d65_vs_control_VPA_high_1B	chr12_96521929_96523120	34.8501269643217	2.76824307959118	1.61138535169545e-06	3.28751636801844e-05	Exon (ENST00000553778.6/144535, exon 6 of 12)	CFAP54
control_d65_vs_control_VPA_high_1B	chr12_96980864_96981514	23.617642772644	2.0313441831274	0.000279337700624466	0.00278984141337494	Distal Intergenic	NEDD1
control_d65_vs_control_VPA_high_1B	chr12_97462635_97463389	23.47269795672	1.39258959007044	0.00627474519246544	0.0335536187971033	Promoter (<=1kb)	RMST
control_d65_vs_control_VPA_high_1B	chr12_97464137_97465495	77.5193354736378	3.00228886242703	1.60537229867104e-15	1.88249733088752e-13	Promoter (<=1kb)	RMST
control_d65_vs_control_VPA_high_1B	chr12_97801409_97802343	26.3065482119424	2.57725766070642	0.000155249462817983	0.00170843827849372	Distal Intergenic	LOC643711
control_d65_vs_control_VPA_high_1B	chr12_98359931_98361450	22.175266637076	1.62209989871692	0.00120547766821482	0.00921211190860814	Distal Intergenic	SLC9A7P1
control_d65_vs_control_VPA_high_1B	chr12_98894354_98895698	70.5448401466139	1.2896014553645	8.66150544453471e-05	0.00104410501562933	Promoter (<=1kb)	ANKS1B
control_d65_vs_control_VPA_high_1B	chr12_99111423_99112118	21.2091699240772	3.68121959037889	9.31188320237807e-08	2.58032620080798e-06	Intron (ENST00000549558.6/56899, intron 1 of 10)	LOC101928937
control_d65_vs_control_VPA_high_1B	chr12_99121424_99122105	25.7341820592248	2.27750096668027	2.90383779896589e-05	0.000408372804142965	Intron (ENST00000549558.6/56899, intron 1 of 10)	LOC101928937
control_d65_vs_control_VPA_high_1B	chr12_99131616_99132307	29.6738265071409	2.69617063193794	2.19223960458431e-06	4.31533717996904e-05	Intron (ENST00000549558.6/56899, intron 1 of 10)	ANKS1B
control_d65_vs_control_VPA_high_1B	chr12_99154234_99155334	45.9038449488317	3.75705127581218	5.26066455756825e-12	3.42709946697059e-10	Promoter (<=1kb)	ANKS1B
control_d65_vs_control_VPA_high_1B	chr12_99237914_99238792	42.3862584220841	2.15342506291393	2.96291794628897e-06	5.61023785069264e-05	Intron (ENST00000547776.6/56899, intron 14 of 25)	ANKS1B
control_d65_vs_control_VPA_high_1B	chr12_99282284_99283276	29.9344891114557	4.04859103924141	9.4617451005142e-07	2.05017504218163e-05	Intron (ENST00000547776.6/56899, intron 12 of 25)	ANKS1B
control_d65_vs_control_VPA_high_1B	chr12_100163497_100164494	53.640236572606	1.18938025275034	0.00148842939786894	0.0109124369181752	Promoter (<=1kb)	GOLGA2P5
control_d65_vs_control_VPA_high_1B	chr12_100372787_100373587	27.5865161649212	2.74057782544628	7.31870233371743e-06	0.000123797542250084	Intron (ENST00000323346.10/246213, intron 1 of 11)	SLC17A8
control_d65_vs_control_VPA_high_1B	chr12_100447232_100448095	20.0403074729586	2.89770303423832	2.20773885229413e-05	0.000323534447731696	Distal Intergenic	NR1H4
control_d65_vs_control_VPA_high_1B	chr12_101712962_101713727	31.9110608405402	2.24400677042059	0.000236025160408895	0.00242479239470581	Promoter (<=1kb)	CHPT1
control_d65_vs_control_VPA_high_1B	chr12_102405864_102406595	28.3561932242302	1.50217518454297	0.000651325744763435	0.00559796421124479	Intron (ENST00000635615.1/ENST00000635615.1, intron 4 of 5)	IGF1
control_d65_vs_control_VPA_high_1B	chr12_102951808_102952690	22.3777336475027	2.88465919061134	0.000324097583092796	0.00315671113002393	Promoter (<=1kb)	PAH
control_d65_vs_control_VPA_high_1B	chr12_102957347_102958068	33.6713166588891	2.32246360744012	0.000139869665987176	0.00156625426558137	Promoter (<=1kb)	ASCL1
control_d65_vs_control_VPA_high_1B	chr12_102958086_102958977	42.7989413728321	1.32820610059202	0.00726082227269378	0.0375415867403038	Promoter (<=1kb)	PAH
control_d65_vs_control_VPA_high_1B	chr12_102961082_102962390	64.1824572591408	2.99045268617028	4.07758692126511e-16	5.3127492967746e-14	Promoter (2-3kb)	PAH
control_d65_vs_control_VPA_high_1B	chr12_103012419_103014338	82.7053276679177	2.01940791218978	2.21894496952087e-10	1.07337491845209e-08	Exon (ENST00000661816.1/ENST00000661816.1, exon 1 of 2)	PAH
control_d65_vs_control_VPA_high_1B	chr12_103043523_103044720	27.624759463842	2.8242907949356	7.85151715390343e-06	0.00013158205452392	Distal Intergenic	PAH
control_d65_vs_control_VPA_high_1B	chr12_103207786_103208616	23.5997552014098	2.68553047799505	6.19839212199586e-05	0.000785022030464667	Distal Intergenic	LOC101929058
control_d65_vs_control_VPA_high_1B	chr12_103301678_103302767	52.49063397031	1.88049275528185	0.000336208144409052	0.0032530092100843	3' UTR	C12orf42
control_d65_vs_control_VPA_high_1B	chr12_103422109_103423691	71.435549206357	2.11300043452093	5.09894646722093e-06	9.03194048742335e-05	Intron (ENST00000547347.5/374470, intron 2 of 10)	C12orf42
control_d65_vs_control_VPA_high_1B	chr12_103494838_103496552	98.1464296937308	2.42505122063852	2.37301879932441e-15	2.70934596546463e-13	Promoter (<=1kb)	C12orf42
control_d65_vs_control_VPA_high_1B	chr12_103571090_103571865	33.7342525160872	3.37106134260718	5.04446860263121e-08	1.48471081951886e-06	Exon (ENST00000650784.1/ENST00000650784.1, exon 1 of 4)	STAB2
control_d65_vs_control_VPA_high_1B	chr12_104750926_104751745	21.0734839918835	1.96778553961289	0.00829164211167361	0.0415397690572251	Intron (ENST00000303694.6/50515, intron 2 of 2)	SLC41A2
control_d65_vs_control_VPA_high_1B	chr12_105232921_105233791	28.5738736662818	2.11323834970294	1.02700189545152e-05	0.000166216383738474	Promoter (<=1kb)	APPL2
control_d65_vs_control_VPA_high_1B	chr12_105348446_105349260	23.8900267982483	2.50339191226871	6.70115283647666e-06	0.000114497986915255	Exon (ENST00000548458.6/387882, exon 3 of 7)	C12orf75
control_d65_vs_control_VPA_high_1B	chr12_106445895_106447109	64.4955068125634	3.40549930458561	3.658876702185e-14	3.48486591052924e-12	Intron (ENST00000228347.9/55703, intron 19 of 27)	POLR3B
control_d65_vs_control_VPA_high_1B	chr12_106493006_106494069	26.4534628277487	1.74425755782689	0.00186069368518565	0.0130266855154533	Intron (ENST00000228347.9/55703, intron 23 of 27)	POLR3B
control_d65_vs_control_VPA_high_1B	chr12_106506552_106507234	20.6738017061865	3.72037967151933	4.05431529255827e-07	9.64224364878175e-06	Intron (ENST00000228347.9/55703, intron 27 of 27)	RFX4
control_d65_vs_control_VPA_high_1B	chr12_106672157_106673525	59.8569342051373	1.59146265775443	5.48991109817812e-05	0.000708069240280419	Intron (ENST00000392842.5/5992, intron 4 of 17)	LOC100505978
control_d65_vs_control_VPA_high_1B	chr12_106878408_106879320	24.448759826802	4.29237441386152	1.85387186790738e-07	4.77161964338109e-06	Promoter (<=1kb)	RIC8B
control_d65_vs_control_VPA_high_1B	chr12_106917290_106918259	25.3795620242856	1.58813895110838	0.00351607683774539	0.0214800604730836	Distal Intergenic	TMEM263
control_d65_vs_control_VPA_high_1B	chr12_107775058_107775859	21.3755698356844	1.73180455660253	0.0102066020982989	0.0486431410033349	Promoter (<=1kb)	ASCL4
control_d65_vs_control_VPA_high_1B	chr12_109291159_109292196	77.4372783164974	1.51977146102417	1.43125530463029e-05	0.000222000482381599	Promoter (<=1kb)	FOXN4
control_d65_vs_control_VPA_high_1B	chr12_109329422_109330884	27.7807010956646	2.10806874810525	6.91019944928733e-05	0.000860681424190961	Distal Intergenic	MYO1H
control_d65_vs_control_VPA_high_1B	chr12_109677123_109677925	23.856680218424	3.64245521564133	2.57942584163126e-06	4.97194182774924e-05	Distal Intergenic	FAM222A
control_d65_vs_control_VPA_high_1B	chr12_109718332_109718826	33.7418034631376	2.10970239326024	3.46210255291255e-05	0.000476035519046009	Intron (ENST00000538780.1/84915, intron 1 of 2)	FAM222A
control_d65_vs_control_VPA_high_1B	chr12_113149295_113149977	33.5761722296927	2.32429839166549	6.14352809438561e-06	0.000106263579306151	Promoter (<=1kb)	CFAP73
control_d65_vs_control_VPA_high_1B	chr12_113161270_113162618	81.6592558664116	2.23956175570162	5.28718920942654e-13	4.13001575290887e-11	Promoter (<=1kb)	DDX54
control_d65_vs_control_VPA_high_1B	chr12_113471445_113472125	22.5138117469232	1.58168781689997	0.00445654962078461	0.02582469523284	Promoter (<=1kb)	LHX5-AS1
control_d65_vs_control_VPA_high_1B	chr12_113762117_113763214	24.5243569849859	2.38814724199968	3.41731345206492e-06	6.36364098472987e-05	Intron (ENST00000661760.1/100506465, intron 2 of 3)	LINC01234
control_d65_vs_control_VPA_high_1B	chr12_116123506_116124341	29.9749962653896	1.84885721285636	3.81231573046596e-05	0.00051765539922721	Intron (ENST00000281928.8/23389, intron 2 of 30)	MIR620
control_d65_vs_control_VPA_high_1B	chr12_116708668_116709619	24.0102491423771	2.19236242248531	3.83240241008115e-05	0.00051989257639189	Downstream (<1kb)	C12orf49
control_d65_vs_control_VPA_high_1B	chr12_116717628_116719313	29.2970559153085	1.60207961216628	0.00064978365440248	0.00558591454441834	Promoter (<=1kb)	C12orf49
control_d65_vs_control_VPA_high_1B	chr12_117102282_117102974	32.5044215172705	2.13641869554646	0.000301206675824361	0.00297116858819749	Promoter (2-3kb)	TESC-AS1
control_d65_vs_control_VPA_high_1B	chr12_117333222_117334221	22.530755651324	2.39443144382749	8.65525501687155e-06	0.000143209700082443	Promoter (2-3kb)	NOS1
control_d65_vs_control_VPA_high_1B	chr12_117968554_117969745	71.8376052254072	2.05337887172638	4.66073620920061e-09	1.72759226545055e-07	Promoter (<=1kb)	KSR2
control_d65_vs_control_VPA_high_1B	chr12_118680175_118681097	36.7563331202107	2.51806920177093	0.000213788109736978	0.0022345744821533	Distal Intergenic	LINC02423
control_d65_vs_control_VPA_high_1B	chr12_118773969_118775018	62.9600137220403	1.94695727264554	8.76708302485552e-07	1.91968687683749e-05	Exon (ENST00000668907.1/ENST00000668907.1, exon 1 of 3)	LINC02423
control_d65_vs_control_VPA_high_1B	chr12_118979791_118980606	26.0546827531448	1.84090661171222	0.0023646969112652	0.01573249909799	Promoter (<=1kb)	SRRM4
control_d65_vs_control_VPA_high_1B	chr12_118980659_118982132	90.8182325733962	2.50064532283893	1.74954670361718e-10	8.6692800690845e-09	Promoter (<=1kb)	SRRM4
control_d65_vs_control_VPA_high_1B	chr12_119008574_119009427	42.9228761290449	2.37573407361851	4.42882200801222e-06	7.983253024769e-05	Intron (ENST00000267260.5/84530, intron 1 of 12)	SRRM4
control_d65_vs_control_VPA_high_1B	chr12_120012220_120012774	23.0724488177993	3.69764833323047	2.65063339019467e-10	1.26138258248209e-08	Intron (ENST00000397558.6/92558, intron 2 of 8)	BICDL1
control_d65_vs_control_VPA_high_1B	chr12_120234645_120235292	30.4249730422199	1.24500562706247	0.00772394405153288	0.0393804790633232	Intron (ENST00000267257.11/5829, intron 1 of 10)	PXN
control_d65_vs_control_VPA_high_1B	chr12_120397538_120398432	56.6021884060279	1.1113661482046	0.00661552181479947	0.0349493245267667	Distal Intergenic	MSI1
control_d65_vs_control_VPA_high_1B	chr12_122871836_122872723	43.7706033654657	1.36129917521117	0.0025990702224819	0.0169390346412161	Promoter (<=1kb)	VPS37B
control_d65_vs_control_VPA_high_1B	chr12_122909792_122910646	24.0445933300701	1.41626916286038	0.00820442832250413	0.0412125179176595	Distal Intergenic	VPS37B
control_d65_vs_control_VPA_high_1B	chr12_123948275_123949620	36.7094543917613	1.14422040383639	0.00683071229037803	0.0358288428427233	Promoter (1-2kb)	CCDC92
control_d65_vs_control_VPA_high_1B	chr12_124786337_124787004	30.9527189980555	1.74363583245014	0.000310367422345779	0.00304660745395616	Promoter (<=1kb)	SCARB1
control_d65_vs_control_VPA_high_1B	chr12_125193626_125194628	22.1798939047513	1.96368384036246	0.00286490744019843	0.018303565110371	Intron (ENST00000418253.2/114795, intron 1 of 1)	TMEM132B
control_d65_vs_control_VPA_high_1B	chr12_129276169_129277420	26.8669148107472	1.87024187273758	0.000692782041387123	0.00589052372882736	Intron (ENST00000422113.7/121256, intron 4 of 8)	TMEM132D-AS2
control_d65_vs_control_VPA_high_1B	chr12_130633428_130634499	39.3664900050184	2.05610070363054	3.03967329537171e-07	7.44132030872123e-06	Promoter (<=1kb)	RIMBP2
control_d65_vs_control_VPA_high_1B	chr12_131030533_131031271	34.2506562940849	2.31657708150161	9.8663047343178e-06	0.000160686959441774	Exon (ENST00000535370.2/ENST00000535370.2, exon 2 of 2)	ADGRD1
control_d65_vs_control_VPA_high_1B	chr12_131379598_131380519	21.3931381571863	2.33713442235394	4.09060362228969e-05	0.0005504188118049	Distal Intergenic	LINC02370
control_d65_vs_control_VPA_high_1B	chr12_131833862_131834551	23.2199690989454	1.97627455866951	0.000580704895614281	0.00510185976734793	Intron (ENST00000360564.5/4326, intron 1 of 9)	MMP17
control_d65_vs_control_VPA_high_1B	chr12_131989988_131991267	42.2548283338341	1.38656884689253	0.00731690500352783	0.0377653772675362	Exon (ENST00000389561.6/57634, exon 8 of 53)	EP400
control_d65_vs_control_VPA_high_1B	chr12_132000924_132001952	37.9817220669111	1.33667019086712	0.00148617003697332	0.0108985702636171	Intron (ENST00000389561.6/57634, intron 12 of 52)	EP400
control_d65_vs_control_VPA_high_1B	chr12_132534881_132535642	20.429523721631	2.21424128648784	7.50649687315476e-05	0.000924039845421705	Intron (ENST00000434748.2/57666, intron 4 of 16)	FBRSL1
control_d65_vs_control_VPA_high_1B	chr13_22880363_22882098	20.9774010257121	2.23151891484226	0.000219089723363924	0.00227982773887898	Intron (ENST00000668623.1/100996930, intron 3 of 5)	LINC00621
control_d65_vs_control_VPA_high_1B	chr13_23432889_23433952	64.5238022729011	1.54740988657852	6.96212139803687e-06	0.000118419031758793	Promoter (<=1kb)	SACS
control_d65_vs_control_VPA_high_1B	chr13_23449012_23449931	25.191905445587	2.7769331541248	0.000158466224249161	0.00173884559581512	Distal Intergenic	SACS
control_d65_vs_control_VPA_high_1B	chr13_23615296_23616479	46.5517073640584	1.98215173471013	2.40338324380941e-06	4.67282586677491e-05	5' UTR	TNFRSF19
control_d65_vs_control_VPA_high_1B	chr13_23753182_23753964	29.4534369335782	1.90934093418341	0.000153569892931171	0.00169397653144407	Promoter (2-3kb)	MIPEP
control_d65_vs_control_VPA_high_1B	chr13_24083103_24084662	51.1825606572462	2.29762834037132	4.79747753685166e-07	1.12114331414655e-05	Intron (ENST00000382141.4/221178, intron 3 of 15)	SPATA13
control_d65_vs_control_VPA_high_1B	chr13_24124489_24125444	28.5807936898577	1.52354590861455	0.00678556022276903	0.0356323241180158	Intron (ENST00000382141.4/221178, intron 3 of 15)	SPATA13
control_d65_vs_control_VPA_high_1B	chr13_24214943_24216250	30.0904405843821	1.28423678281389	0.00480127141206942	0.0273398723409047	Intron (ENST00000382141.4/221178, intron 3 of 15)	SPATA13
control_d65_vs_control_VPA_high_1B	chr13_25046660_25047768	45.2165025238347	1.17364479263878	0.0037993987746568	0.0228192867986121	Distal Intergenic	PABPC3
control_d65_vs_control_VPA_high_1B	chr13_25136737_25138254	38.6596355498187	1.72419340228246	0.000420601671635573	0.00391452732778678	Distal Intergenic	LINC01053
control_d65_vs_control_VPA_high_1B	chr13_25170354_25172543	75.2400939513873	1.05377884115629	0.000298754918651796	0.00295136518229649	Promoter (<=1kb)	AMER2
control_d65_vs_control_VPA_high_1B	chr13_25179947_25181683	36.711058626239	1.89881861919081	0.000147416042224916	0.00163851677465114	Promoter (<=1kb)	LINC00463
control_d65_vs_control_VPA_high_1B	chr13_25468235_25469455	45.4881961111013	2.92482534320474	1.16307383645654e-07	3.14463742034809e-06	Promoter (<=1kb)	ATP8A2
control_d65_vs_control_VPA_high_1B	chr13_27006459_27007603	27.1918999696547	1.82841785825337	0.000244250646043649	0.00249412915102025	Distal Intergenic	USP12
control_d65_vs_control_VPA_high_1B	chr13_27744549_27745826	38.4104509148966	1.82014135601001	0.00116106388573799	0.00893235211241259	Distal Intergenic	GSX1
control_d65_vs_control_VPA_high_1B	chr13_27829904_27830401	21.7709115466348	1.74485615329842	0.00473579189658473	0.0270566654653382	Intron (ENST00000499662.3/100861550, intron 3 of 4)	GSX1
control_d65_vs_control_VPA_high_1B	chr13_29428158_29429223	38.1523733930184	1.13363580368188	0.00392963350911857	0.0234299432167479	Promoter (<=1kb)	MTUS2
control_d65_vs_control_VPA_high_1B	chr13_29892146_29892684	29.4856399035507	2.09188407468238	5.64324161777431e-06	9.87671328829533e-05	Distal Intergenic	LINC00297
control_d65_vs_control_VPA_high_1B	chr13_31043875_31044794	26.8071546928632	1.24572871517229	0.00389526037972024	0.0232653576119281	Distal Intergenic	TEX26
control_d65_vs_control_VPA_high_1B	chr13_31046565_31047519	42.3907751951916	1.26806645663098	0.000177130974886784	0.00190846131876451	Distal Intergenic	TEX26
control_d65_vs_control_VPA_high_1B	chr13_31184786_31185855	23.6534235353707	3.22104738360052	3.7197897165303e-07	8.93081056041732e-06	Distal Intergenic	B3GLCT
control_d65_vs_control_VPA_high_1B	chr13_31274234_31274936	25.0360202680937	2.55674237831005	1.94073619298281e-05	0.000288887393314182	Exon (ENST00000343307.5/145173, exon 9 of 15)	B3GLCT
control_d65_vs_control_VPA_high_1B	chr13_32025449_32026209	30.21067221669	2.92261813424052	4.53422639415241e-06	8.15113982116246e-05	Exon (ENST00000428419.1/100507099, exon 4 of 4)	FRY
control_d65_vs_control_VPA_high_1B	chr13_32046032_32046890	26.7060640683445	1.2279976517587	0.00907405980844487	0.0444594584519061	Intron (ENST00000645780.1/10129, intron 2 of 61)	FRY
control_d65_vs_control_VPA_high_1B	chr13_33006265_33007544	32.8060529590358	1.70095013726609	0.00718681021357098	0.0372371437551209	Distal Intergenic	KL
control_d65_vs_control_VPA_high_1B	chr13_34627482_34628272	22.7775006139608	2.12015949423104	0.00521102531438811	0.0291183476474285	Intron (ENST00000440160.1/100874179, intron 1 of 2)	LINC00457
control_d65_vs_control_VPA_high_1B	chr13_35478353_35479499	37.4393758644002	2.11970036194439	2.52538364884004e-05	0.000363038241048292	Promoter (1-2kb)	NBEA
control_d65_vs_control_VPA_high_1B	chr13_35499213_35500605	75.36425327949	1.7540349171058	1.32768778156551e-06	2.77460161970812e-05	Intron (ENST00000400445.7/26960, intron 41 of 57)	NBEA
control_d65_vs_control_VPA_high_1B	chr13_36074525_36075128	20.2258502933003	2.52609078362811	2.67567473380967e-05	0.000381343429960694	Intron (ENST00000360631.7/9201, intron 3 of 16)	DCLK1
control_d65_vs_control_VPA_high_1B	chr13_36154502_36155420	27.8853714050112	1.52755752611787	0.00437063538553425	0.0254573882058906	Distal Intergenic	DCLK1
control_d65_vs_control_VPA_high_1B	chr13_36903917_36904724	23.3989753662214	4.48403152398823	6.63302318304864e-08	1.90090086177115e-06	Intron (ENST00000350148.9/4093, intron 1 of 5)	SMAD9
control_d65_vs_control_VPA_high_1B	chr13_37646862_37647760	30.8727532963244	2.88633208422107	8.32536038863049e-06	0.000138417622354623	Intron (ENST00000379705.7/7223, intron 8 of 10)	TRPC4
control_d65_vs_control_VPA_high_1B	chr13_37681755_37682722	34.0802602337416	1.94013230075406	0.00135610942514558	0.0101343951064693	Intron (ENST00000379705.7/7223, intron 4 of 10)	TRPC4
control_d65_vs_control_VPA_high_1B	chr13_37735933_37736665	37.5977148540759	2.57598756271027	6.76154866480567e-08	1.9330097234108e-06	Intron (ENST00000379705.7/7223, intron 3 of 10)	TRPC4
control_d65_vs_control_VPA_high_1B	chr13_37914371_37915389	24.1869480862628	2.60172871591123	8.29305667559988e-06	0.000137938062248989	Distal Intergenic	TRPC4
control_d65_vs_control_VPA_high_1B	chr13_37994980_37995671	26.7514205036659	5.26569186978905	1.09915268027945e-08	3.75770348487373e-07	Intron (ENST00000666031.1/ENST00000666031.1, intron 1 of 3)	LINC00571
control_d65_vs_control_VPA_high_1B	chr13_39770112_39771244	31.3455238834099	3.99695413758239	2.96786169816995e-12	2.01853073382254e-10	Intron (ENST00000416691.5/57511, intron 18 of 18)	COG6
control_d65_vs_control_VPA_high_1B	chr13_40087008_40088038	22.3323667775344	1.96648264021738	0.000316265246126206	0.00309322989668701	Intron (ENST00000615947.1/ENST00000615947.1, intron 3 of 3)	LINC00332
control_d65_vs_control_VPA_high_1B	chr13_40390207_40391096	60.3153615473387	1.80226893456021	7.98233072554826e-06	0.000133482568644841	Intron (ENST00000636192.2/646982, intron 1 of 3)	LINC00598
control_d65_vs_control_VPA_high_1B	chr13_41781904_41782591	20.0632078273578	3.75986396727084	1.39051011452009e-05	0.000216556741632126	Intron (ENST00000379310.8/23078, intron 19 of 44)	VWA8
control_d65_vs_control_VPA_high_1B	chr13_42592828_42594307	40.19061281194	3.04695678043041	6.06380764755308e-09	2.19501688634305e-07	Intron (ENST00000358545.6/8600, intron 4 of 6)	TNFSF11
control_d65_vs_control_VPA_high_1B	chr13_43270077_43271027	20.3153387176851	1.80380836978227	0.000441440902744067	0.00407706996842193	Intron (ENST00000261488.10/55068, intron 12 of 16)	ENOX1
control_d65_vs_control_VPA_high_1B	chr13_44044542_44045723	20.1704302403804	1.33644859490914	0.0101923155658067	0.0485936415091675	Distal Intergenic	NRAD1
control_d65_vs_control_VPA_high_1B	chr13_44305853_44307191	69.226490407954	1.41470084380315	1.67835244842876e-05	0.0002545441624958	Distal Intergenic	SERP2
control_d65_vs_control_VPA_high_1B	chr13_44763676_44765515	32.2517163928658	2.02056403181626	3.22727182922603e-05	0.000447948565707347	Distal Intergenic	LINC00330
control_d65_vs_control_VPA_high_1B	chr13_44902683_44903376	33.947230031301	2.54414804993438	2.65042290052243e-05	0.000378177083621462	Distal Intergenic	NUFIP1
control_d65_vs_control_VPA_high_1B	chr13_44931008_44931848	29.7915759674663	2.41026744851003	2.17471843655897e-05	0.000319352796651407	Distal Intergenic	NUFIP1
control_d65_vs_control_VPA_high_1B	chr13_45101946_45103445	81.9942380431986	1.61903237693385	3.20985630360487e-07	7.81284511231278e-06	Distal Intergenic	GTF2F2
control_d65_vs_control_VPA_high_1B	chr13_45615151_45616254	92.7498163868545	1.21237775725772	1.87139785848996e-05	0.000280029783439829	Promoter (<=1kb)	ERICH6B
control_d65_vs_control_VPA_high_1B	chr13_45704952_45705755	21.9270635428932	2.7596160828881	0.000127417661823904	0.00144606895610293	Promoter (1-2kb)	CBY2
control_d65_vs_control_VPA_high_1B	chr13_45768436_45769925	33.3771912081931	3.1761343831363	2.02169725755636e-10	9.84169136763932e-09	Distal Intergenic	CBY2
control_d65_vs_control_VPA_high_1B	chr13_45787292_45789027	27.3063096875008	2.4624660439844	1.93789899758281e-08	6.31848893641057e-07	Intron (ENST00000400405.4/283514, intron 1 of 1)	SIAH3
control_d65_vs_control_VPA_high_1B	chr13_45850068_45852074	44.701809465534	1.33182366367783	0.0011495036558153	0.00886659975260427	Promoter (<=1kb)	SIAH3
control_d65_vs_control_VPA_high_1B	chr13_49681642_49682615	22.7500338116814	2.91979054738481	2.37644133547731e-08	7.58217148626857e-07	Intron (ENST00000242827.11/84650, intron 1 of 3)	EBPL
control_d65_vs_control_VPA_high_1B	chr13_50393506_50394091	27.323250310021	2.20627296087466	2.12675114334375e-05	0.000313116198981538	Intron (ENST00000461527.6/10301, intron 3 of 5)	DLEU1
control_d65_vs_control_VPA_high_1B	chr13_50990342_50991644	87.5436253637979	2.18061448890081	4.63110190236683e-14	4.32003575025372e-12	Intron (ENST00000645955.1/79621, intron 10 of 10)	GUCY1B2
control_d65_vs_control_VPA_high_1B	chr13_51246056_51247327	36.6093758554622	1.39503542343475	0.000119002919553669	0.00136573149115405	Intron (ENST00000615498.4/220108, intron 2 of 2)	FAM124A
control_d65_vs_control_VPA_high_1B	chr13_51632737_51633648	44.1858360165019	1.0388391695457	0.00447702212856021	0.0259184658546774	Intron (ENST00000298125.7/115825, intron 1 of 11)	WDFY2
control_d65_vs_control_VPA_high_1B	chr13_51644684_51645684	24.5170373145607	1.44024568212379	0.00457920919990809	0.0263722896840172	Intron (ENST00000298125.7/115825, intron 1 of 11)	WDFY2
control_d65_vs_control_VPA_high_1B	chr13_51785894_51787047	29.8091965752386	2.56669438414012	1.32914988257456e-07	3.54225551459504e-06	Intron (ENST00000642706.1/79758, intron 7 of 10)	DHRS12
control_d65_vs_control_VPA_high_1B	chr13_51874463_51875307	29.534833922609	3.80696579597255	1.04102428894805e-08	3.57676711314441e-07	Distal Intergenic	CCDC70
control_d65_vs_control_VPA_high_1B	chr13_52931020_52932389	65.4143878145774	3.49319194683723	3.43011550989919e-13	2.77733471338897e-11	Distal Intergenic	PCDH8
control_d65_vs_control_VPA_high_1B	chr13_52961175_52962518	33.0194621599188	1.82855052423889	0.00104590870202251	0.00821698258506265	Distal Intergenic	OLFM4
control_d65_vs_control_VPA_high_1B	chr13_53198424_53199338	23.8419153258741	3.03834963171478	2.37865980222487e-08	7.58760961494796e-07	Exon (ENST00000625090.1/ENST00000625090.1, exon 2 of 2)	LINC01065
control_d65_vs_control_VPA_high_1B	chr13_54175146_54175973	20.4142210490251	1.63730015857779	0.00546293174286892	0.0301833035258855	Distal Intergenic	LINC00458
control_d65_vs_control_VPA_high_1B	chr13_57724171_57725156	21.280904657598	2.38541353283554	0.000334340753954938	0.00323714080032547	3' UTR	PCDH17
control_d65_vs_control_VPA_high_1B	chr13_58254744_58255704	41.6764502921732	3.36580530703301	9.64010369881578e-07	2.08406475647341e-05	Distal Intergenic	LINC00374
control_d65_vs_control_VPA_high_1B	chr13_59750631_59751460	63.10390184317	1.56942598045913	2.43887340990115e-07	6.10778465791652e-06	Promoter (<=1kb)	DIAPH3
control_d65_vs_control_VPA_high_1B	chr13_60626296_60627504	26.6095625014072	2.24547860945182	1.02589943146577e-06	2.20328537023245e-05	Intron (ENST00000663355.1/101926930, intron 1 of 2)	LINC00378
control_d65_vs_control_VPA_high_1B	chr13_62031021_62031905	21.7172627654229	2.6517460675779	0.000115162795387316	0.0013280829925535	Promoter (1-2kb)	LINC00358
control_d65_vs_control_VPA_high_1B	chr13_62085295_62086313	33.2576002175383	3.78793857677686	4.36440671515876e-12	2.89003695289144e-10	Distal Intergenic	LINC00358
control_d65_vs_control_VPA_high_1B	chr13_66264704_66266116	54.170735722755	1.19228101674012	0.000112222610936143	0.00129898551850402	Distal Intergenic	PCDH9
control_d65_vs_control_VPA_high_1B	chr13_66344663_66346306	72.6073010161993	2.76346575024383	6.11328317722807e-14	5.61076679672056e-12	Intron (ENST00000377865.7/5101, intron 4 of 4)	PCDH9
control_d65_vs_control_VPA_high_1B	chr13_67147326_67148584	38.6313266819618	1.30602816516235	0.000979273851750758	0.00779734483348405	Intron (ENST00000648561.1/ENST00000648561.1, intron 2 of 2)	PCDH9
control_d65_vs_control_VPA_high_1B	chr13_69199428_69200188	24.169368674081	3.81986832710049	9.43959276721866e-08	2.61317186470486e-06	Distal Intergenic	LINC00383
control_d65_vs_control_VPA_high_1B	chr13_70107300_70109101	51.3324872555084	2.44376181605384	2.5936239406596e-09	1.00785293971682e-07	Promoter (<=1kb)	KLHL1
control_d65_vs_control_VPA_high_1B	chr13_71801603_71802340	27.1413664893496	2.71900969382805	7.80718341166726e-07	1.72983303810406e-05	Intron (ENST00000611519.4/1602, intron 1 of 7)	DACH1
control_d65_vs_control_VPA_high_1B	chr13_71851926_71852983	22.3423049782662	1.7321671713117	0.00662166153446323	0.0349771255266198	Intron (ENST00000611519.4/1602, intron 1 of 7)	DACH1
control_d65_vs_control_VPA_high_1B	chr13_74287675_74288207	26.1203485491132	1.42427556344513	0.00250393590146438	0.0164502391396143	Exon (ENST00000653992.1/ENST00000653992.1, exon 1 of 6)	LINC00402
control_d65_vs_control_VPA_high_1B	chr13_74554547_74555796	29.11335748732	2.4975186560157	3.15518876387934e-06	5.92868563789509e-05	Promoter (<=1kb)	LINC00347
control_d65_vs_control_VPA_high_1B	chr13_74575072_74576387	54.6282130259652	1.2740548192779	5.40233585195652e-05	0.000698035931241991	Distal Intergenic	LINC00347
control_d65_vs_control_VPA_high_1B	chr13_75999793_76000652	23.5374587267204	2.52068936528003	0.000132034187456084	0.00149099230343967	Distal Intergenic	LINC00561
control_d65_vs_control_VPA_high_1B	chr13_77477858_77479075	39.4022509316746	1.38827741863374	0.000466320153570984	0.00426823322357487	Distal Intergenic	SCEL
control_d65_vs_control_VPA_high_1B	chr13_77492671_77493527	24.1638921657589	2.45772570185899	2.28284023910672e-05	0.000332803181442861	Distal Intergenic	SCEL
control_d65_vs_control_VPA_high_1B	chr13_77740696_77742017	37.8322230804373	3.19041986460763	1.55661882193764e-12	1.11983304106092e-10	Promoter (<=1kb)	SLAIN1
control_d65_vs_control_VPA_high_1B	chr13_77832065_77833933	85.4755199080133	1.75823033893958	3.36919674348468e-08	1.03615534407081e-06	Exon (ENST00000667150.1/100505518, exon 4 of 5)	EDNRB-AS1
control_d65_vs_control_VPA_high_1B	chr13_77853257_77854231	75.1488162052286	2.84003747573764	2.73440363680154e-12	1.87381377580557e-10	Distal Intergenic	EDNRB-AS1
control_d65_vs_control_VPA_high_1B	chr13_78029632_78030944	77.9661003983073	2.91915251932314	7.76449854442832e-13	5.87854814598407e-11	Promoter (<=1kb)	LINC00446
control_d65_vs_control_VPA_high_1B	chr13_79287761_79288835	21.3507867564541	1.88817101086135	0.00225867969869236	0.0151729996028822	Distal Intergenic	RBM26
control_d65_vs_control_VPA_high_1B	chr13_79782287_79783375	78.0329102260948	1.19085104690955	0.000186804843469862	0.00199351168770574	Distal Intergenic	LINC01038
control_d65_vs_control_VPA_high_1B	chr13_80010277_80011156	23.6864399568631	2.51497933192859	3.67911005788355e-06	6.78276999481411e-05	Promoter (<=1kb)	LINC01080
control_d65_vs_control_VPA_high_1B	chr13_80276189_80277277	41.9465311533895	1.43523855924519	0.000618110502419033	0.00536382797384749	Distal Intergenic	SPRY2
control_d65_vs_control_VPA_high_1B	chr13_80359244_80360238	58.48884839997	2.78463430399297	1.57862174682484e-05	0.000241439259431138	Distal Intergenic	SPRY2
control_d65_vs_control_VPA_high_1B	chr13_80945188_80945815	32.4103834696809	1.51688721571091	0.000832890442249925	0.00684165889652025	Intron (ENST00000665186.1/ENST00000665186.1, intron 1 of 4)	LINC00377
control_d65_vs_control_VPA_high_1B	chr13_89565282_89566132	20.1561013504107	2.93940793010973	5.27298837092596e-05	0.000683961265571612	Intron (ENST00000659314.1/ENST00000659314.1, intron 3 of 3)	LINC00353
control_d65_vs_control_VPA_high_1B	chr13_90259771_90260738	34.2260862327108	3.46224810273143	2.15287971693415e-09	8.48661182622018e-08	Distal Intergenic	MIR622
control_d65_vs_control_VPA_high_1B	chr13_91740351_91741231	27.8113382831567	3.99462009129468	9.12556715793911e-11	4.75966852607674e-09	Intron (ENST00000377067.9/2262, intron 4 of 7)	GPC5
control_d65_vs_control_VPA_high_1B	chr13_93293462_93294207	26.7194392920464	2.40535727703009	5.48046546278613e-05	0.000706988201737245	Intron (ENST00000377047.9/10082, intron 1 of 8)	GPC6
control_d65_vs_control_VPA_high_1B	chr13_93309685_93310508	46.8687190559588	1.66056821494178	2.30293562392092e-06	4.50035295447643e-05	Exon (ENST00000657026.1/ENST00000657026.1, exon 2 of 2)	GPC6
control_d65_vs_control_VPA_high_1B	chr13_94312379_94313495	42.104109903691	2.50276181742281	6.95989975507862e-08	1.98374060133815e-06	Intron (ENST00000377047.9/10082, intron 6 of 8)	GPC6
control_d65_vs_control_VPA_high_1B	chr13_94479267_94480544	98.755171623126	2.84907138048707	1.91599286497747e-13	1.62599196961174e-11	Promoter (<=1kb)	DCT
control_d65_vs_control_VPA_high_1B	chr13_94706298_94707699	175.319444605766	3.79473716956628	7.32552044008277e-33	1.10629787700662e-29	Promoter (2-3kb)	LOC101927284
control_d65_vs_control_VPA_high_1B	chr13_94707984_94708781	78.3763116506404	3.89228024875081	7.68174925130117e-15	8.13237379845928e-13	Exon (ENST00000670861.1/ENST00000670861.1, exon 1 of 3)	SOX21
control_d65_vs_control_VPA_high_1B	chr13_94722506_94723253	24.4721355062414	1.89561816982445	0.00340041305514234	0.0209254411585604	Intron (ENST00000665450.1/101927284, intron 1 of 3)	SOX21-AS1
control_d65_vs_control_VPA_high_1B	chr13_94947429_94948732	146.419608649948	3.3563393558742	1.20094325306841e-27	8.86678643430281e-25	Distal Intergenic	LINC00557
control_d65_vs_control_VPA_high_1B	chr13_95100427_95101550	83.5182924924885	2.11982918470969	2.52064017019184e-07	6.28728147356185e-06	Intron (ENST00000645237.2/10257, intron 20 of 30)	ABCC4
control_d65_vs_control_VPA_high_1B	chr13_95113117_95114396	29.097367503773	3.15575117748607	2.74055699994029e-07	6.77647079769408e-06	Intron (ENST00000645237.2/10257, intron 20 of 30)	ABCC4
control_d65_vs_control_VPA_high_1B	chr13_95127613_95128705	33.1257533824493	2.12418495635972	2.24301032630314e-05	0.000327931599858862	Intron (ENST00000645237.2/10257, intron 19 of 30)	ABCC4
control_d65_vs_control_VPA_high_1B	chr13_95354694_95355830	58.1220974263501	1.65921155003573	0.000131523764267331	0.00148573334343714	Distal Intergenic	ABCC4
control_d65_vs_control_VPA_high_1B	chr13_96851641_96852497	26.7372216184883	2.87997628104987	2.4617612598951e-06	4.77143665644189e-05	Distal Intergenic	LINC00359
control_d65_vs_control_VPA_high_1B	chr13_97367050_97368005	24.0804590941104	2.34602271861626	1.69732307531602e-05	0.000256952130750264	Intron (ENST00000397601.5/10150, intron 6 of 6)	MBNL2
control_d65_vs_control_VPA_high_1B	chr13_99690519_99691194	23.0068101472224	2.41491596796797	0.000483540424006888	0.0043948319593342	Promoter (<=1kb)	CLYBL-AS2
control_d65_vs_control_VPA_high_1B	chr13_99742952_99743749	22.1315317443905	2.41473810589289	0.000149541147562809	0.00165751624142651	Intron (ENST00000376355.7/171425, intron 1 of 7)	CLYBL-AS1
control_d65_vs_control_VPA_high_1B	chr13_99746538_99747801	46.6513189880584	2.09150196002676	0.000126859914696607	0.00144080540993105	Intron (ENST00000376355.7/171425, intron 1 of 7)	CLYBL-AS1
control_d65_vs_control_VPA_high_1B	chr13_99860330_99861379	43.6348425827894	1.58183383932756	0.000507746044022603	0.0045700353481908	Promoter (1-2kb)	CLYBL
control_d65_vs_control_VPA_high_1B	chr13_99891989_99893033	50.0006246193904	2.25256377975491	9.45913448280885e-08	2.61785453645705e-06	3' UTR	CLYBL
control_d65_vs_control_VPA_high_1B	chr13_100510112_100511089	37.4449388540127	4.77271960454255	1.46361806589309e-13	1.26786126075188e-11	Intron (ENST00000376279.7/5095, intron 21 of 22)	PCCA
control_d65_vs_control_VPA_high_1B	chr13_100530636_100531473	22.3285627916441	2.06317790418867	0.000158393235857057	0.00173814037185736	Promoter (2-3kb)	GGACT
control_d65_vs_control_VPA_high_1B	chr13_100630338_100631073	24.5076777921437	2.06206351105087	0.000254168562664696	0.00257915430353558	Intron (ENST00000376234.7/84899, intron 11 of 17)	TMTC4
control_d65_vs_control_VPA_high_1B	chr13_100636054_100636972	25.2721458097886	2.03818288951158	4.2213199065528e-05	0.00056541237525477	Promoter (<=1kb)	TMTC4
control_d65_vs_control_VPA_high_1B	chr13_100808242_100809731	43.2122869168483	2.24573882428507	4.63299698440715e-05	0.000612852964070092	Intron (ENST00000457843.1/100885778, intron 2 of 7)	NALCN-AS1
control_d65_vs_control_VPA_high_1B	chr13_101016477_101017758	23.8851942482617	2.00995388948702	0.000962098356203586	0.00768859877885096	Intron (ENST00000457843.1/100885778, intron 3 of 7)	LINC00411
control_d65_vs_control_VPA_high_1B	chr13_101915490_101917208	39.4849611959324	1.1729834953662	0.00550178874497418	0.030348365454374	Promoter (<=1kb)	FGF14
control_d65_vs_control_VPA_high_1B	chr13_102033438_102034512	50.7510837255357	2.56684812512672	2.90947907026661e-09	1.12032647236115e-07	Intron (ENST00000376131.8/2259, intron 1 of 4)	MIR4705
control_d65_vs_control_VPA_high_1B	chr13_105772993_105775251	32.1548659130347	1.18741294112739	0.00372274972156059	0.0224501146592408	Intron (ENST00000669840.1/144920, intron 1 of 1)	LINC00343
control_d65_vs_control_VPA_high_1B	chr13_106332355_106333156	22.8310324486798	4.46700723196803	1.26623883811401e-09	5.24671892377209e-08	Intron (ENST00000669705.1/ENST00000669705.1, intron 1 of 2)	LINC00460
control_d65_vs_control_VPA_high_1B	chr13_106347851_106348492	25.0387578887979	2.24668495349565	0.000327387930833722	0.00318141144876567	Intron (ENST00000669705.1/ENST00000669705.1, intron 1 of 2)	LINC00460
control_d65_vs_control_VPA_high_1B	chr13_106348899_106350045	36.7159833601047	1.74996478789858	4.57185888955271e-05	0.000605906445337199	Intron (ENST00000669705.1/ENST00000669705.1, intron 1 of 2)	LINC00460
control_d65_vs_control_VPA_high_1B	chr13_106443600_106444340	21.9323886742376	3.69631508755649	6.54469097381729e-08	1.8774758481315e-06	Distal Intergenic	LINC00460
control_d65_vs_control_VPA_high_1B	chr13_106512951_106514047	26.3217847046711	1.76223999394392	0.000410410521361932	0.00383471740292551	Promoter (2-3kb)	EFNB2
control_d65_vs_control_VPA_high_1B	chr13_106528955_106530593	87.8828447222883	1.78532820108923	4.33165084159521e-09	1.61612814648819e-07	Intron (ENST00000646441.1/1948, intron 1 of 4)	EFNB2
control_d65_vs_control_VPA_high_1B	chr13_106660613_106661930	44.4977642660505	3.04652585203779	3.38592647252595e-10	1.58035799248925e-08	Intron (ENST00000667614.1/ENST00000667614.1, intron 1 of 1)	LINC00443
control_d65_vs_control_VPA_high_1B	chr13_106680751_106681791	55.3844928265936	2.77359186560623	1.98767162103664e-10	9.68551422554801e-09	Intron (ENST00000667614.1/ENST00000667614.1, intron 1 of 1)	LINC00443
control_d65_vs_control_VPA_high_1B	chr13_106756104_106757049	42.4788337395105	2.50691621496309	0.00126896990250198	0.00960927157394717	Exon (ENST00000664543.1/ENST00000664543.1, exon 2 of 2)	LINC00443
control_d65_vs_control_VPA_high_1B	chr13_107562193_107563679	28.7862341631207	2.0744174714409	0.000137795536878954	0.00154702574311061	Intron (ENST00000375915.4/728215, intron 1 of 2)	MIR1267
control_d65_vs_control_VPA_high_1B	chr13_108120169_108121267	22.0764294360657	3.11132762534478	2.41629165439395e-07	6.05884372499139e-06	Distal Intergenic	LIG4
control_d65_vs_control_VPA_high_1B	chr13_108785744_108787096	50.7888667062954	2.13827995859887	4.58566496108851e-05	0.000607196258607207	Intron (ENST00000356711.7/23026, intron 5 of 34)	MYO16
control_d65_vs_control_VPA_high_1B	chr13_109196914_109197714	25.1942124492351	1.43014238730983	0.00627987197909246	0.0335726366795132	Intron (ENST00000356711.7/23026, intron 34 of 34)	MYO16-AS1
control_d65_vs_control_VPA_high_1B	chr13_109275134_109276180	24.1818814185615	2.623811200475	3.60144542595845e-07	8.66755692240872e-06	Intron (ENST00000649017.1/ENST00000649017.1, intron 1 of 1)	MYO16-AS1
control_d65_vs_control_VPA_high_1B	chr13_109412247_109413213	51.8767872819554	1.27982633977656	0.000290117110786353	0.00288002019654481	Distal Intergenic	LINC00399
control_d65_vs_control_VPA_high_1B	chr13_110454016_110454969	23.1549069253968	1.56270204974142	0.00938697016272885	0.0456214485227917	Intron (ENST00000360467.7/1284, intron 20 of 47)	COL4A2
control_d65_vs_control_VPA_high_1B	chr13_110466116_110466946	24.174260406878	2.08729668718083	0.000547394768434235	0.00485997227578902	Promoter (<=1kb)	COL4A2
control_d65_vs_control_VPA_high_1B	chr13_111384745_111385700	21.0166323011955	2.33498727395782	2.91358097748158e-05	0.000409483018568135	Distal Intergenic	TEX29
control_d65_vs_control_VPA_high_1B	chr13_111658082_111659082	31.5624672479248	1.70868971233521	0.00560255607902163	0.0307739210880813	Intron (ENST00000375713.1/ENST00000375713.1, intron 3 of 3)	LINC02337
control_d65_vs_control_VPA_high_1B	chr13_111892861_111894522	90.7730377341919	1.23148544738716	2.12660581952491e-05	0.000313116198981538	Promoter (<=1kb)	LINC00354
control_d65_vs_control_VPA_high_1B	chr13_111973204_111974287	23.9977261573137	1.79425182139359	0.00455087319655164	0.0262580414432904	Distal Intergenic	LINC00354
control_d65_vs_control_VPA_high_1B	chr13_111976626_111977475	26.9246613172622	3.11319082280484	6.4600665359087e-10	2.85287643701209e-08	Distal Intergenic	LINC00354
control_d65_vs_control_VPA_high_1B	chr13_112072223_112073962	130.518100973551	1.03720931997378	0.000295978218471296	0.00292843329061837	Intron (ENST00000663025.1/100505996, intron 1 of 3)	SOX1
control_d65_vs_control_VPA_high_1B	chr13_112103399_112105237	110.478864698548	1.12630584663376	0.00025043245422687	0.00254720689934739	Promoter (1-2kb)	SOX1-OT
control_d65_vs_control_VPA_high_1B	chr13_112160590_112162376	105.690886640664	1.82538725394171	2.77195072751942e-07	6.84936707696424e-06	Distal Intergenic	LINC01070
control_d65_vs_control_VPA_high_1B	chr13_112733793_112734542	40.554262264894	2.06240011872673	0.000165192897819465	0.00179944889029345	Intron (ENST00000375630.6/23250, intron 1 of 28)	ATP11A-AS1
control_d65_vs_control_VPA_high_1B	chr13_112891400_112892233	66.4867331407673	1.11859218417602	0.00261807993541659	0.0170406426618851	Promoter (2-3kb)	MCF2L
control_d65_vs_control_VPA_high_1B	chr13_112956651_112957481	33.0393917246083	1.52178325854237	0.00168890999174139	0.0120720517484915	3' UTR	MCF2L
control_d65_vs_control_VPA_high_1B	chr13_113724721_113725498	39.6129411202748	2.83050258702262	6.19783371359113e-06	0.000107091389396683	Promoter (<=1kb)	GRK1
control_d65_vs_control_VPA_high_1B	chr14_21539069_21539723	27.4372995768003	2.46689143388997	0.00243804828837173	0.0161199062717662	Promoter (1-2kb)	SALL2
control_d65_vs_control_VPA_high_1B	chr14_23024678_23026208	21.1962741893397	1.8374635181425	0.000503210040691597	0.00453842956936647	3' UTR	PSMB5
control_d65_vs_control_VPA_high_1B	chr14_23436579_23437451	43.5181858102669	2.83645798391547	6.91674779416575e-14	6.3017641945876e-12	Promoter (<=1kb)	MYH7
control_d65_vs_control_VPA_high_1B	chr14_23481896_23483706	44.2412427001433	1.93797692785954	1.14191452048573e-06	2.42475598637354e-05	Intron (ENST00000556699.1/25983, intron 2 of 2)	NGDN
control_d65_vs_control_VPA_high_1B	chr14_23578105_23579269	49.4942029340563	1.81364690011355	6.88806927642615e-07	1.5452498964421e-05	Promoter (<=1kb)	JPH4
control_d65_vs_control_VPA_high_1B	chr14_24079567_24080141	21.5539241604216	2.12470141211786	0.000529230948474136	0.00472840053130715	Promoter (1-2kb)	NRL
control_d65_vs_control_VPA_high_1B	chr14_24171383_24172395	53.7268759429902	1.05650703409403	0.00804900595188651	0.0406225712196183	Promoter (<=1kb)	REC8
control_d65_vs_control_VPA_high_1B	chr14_26974664_26975732	29.6902667710802	2.3823033112438	9.86808572532004e-06	0.000160702836124471	Intron (ENST00000656336.1/102725045, intron 2 of 5)	MIR4307
control_d65_vs_control_VPA_high_1B	chr14_27798694_27799810	23.3645800976439	2.57611778693577	4.84530980229215e-05	0.000636419007608705	Intron (ENST00000555797.1/728755, intron 1 of 3)	LOC728755
control_d65_vs_control_VPA_high_1B	chr14_28764154_28764746	27.0617095991898	2.84333871690641	2.58056989064548e-06	4.9736661067448e-05	Promoter (<=1kb)	FOXG1-AS1
control_d65_vs_control_VPA_high_1B	chr14_28765758_28767108	91.9963877256568	1.14686386686618	5.0563681901979e-05	0.000659275801715737	Promoter (<=1kb)	FOXG1
control_d65_vs_control_VPA_high_1B	chr14_28875885_28876915	41.8384004840688	3.5146504326509	9.56563353659765e-13	7.10458562960728e-11	Exon (ENST00000650159.1/ENST00000650159.1, exon 5 of 5)	LINC02282
control_d65_vs_control_VPA_high_1B	chr14_28879321_28880117	52.2285424529545	2.39770880947518	8.74872027161664e-10	3.76191197425731e-08	Intron (ENST00000671154.1/ENST00000671154.1, intron 3 of 5)	LINC02282
control_d65_vs_control_VPA_high_1B	chr14_29674192_29675286	37.7899727557907	3.85281909124286	2.22698224825451e-07	5.62875622239816e-06	Intron (ENST00000616995.4/5587, intron 3 of 18)	PRKD1
control_d65_vs_control_VPA_high_1B	chr14_29821328_29822781	32.5189608694061	1.34034357629209	0.000842796312472104	0.00690830453032208	Intron (ENST00000616995.4/5587, intron 1 of 18)	PRKD1
control_d65_vs_control_VPA_high_1B	chr14_30272859_30273964	76.5403083040393	3.83559715707498	3.66712315783593e-23	1.42500259848336e-20	Intron (ENST00000549360.1/ENST00000549360.1, intron 1 of 2)	PRKD1
control_d65_vs_control_VPA_high_1B	chr14_31261496_31262480	27.9717666955483	1.80971587589834	0.00210862474243058	0.0143698177186027	Intron (ENST00000551799.1/ENST00000551799.1, intron 1 of 5)	HEATR5A
control_d65_vs_control_VPA_high_1B	chr14_31962644_31963486	36.3691464120635	2.21567246202584	1.59187792223701e-06	3.25237774199302e-05	Distal Intergenic	LINC02313
control_d65_vs_control_VPA_high_1B	chr14_32726492_32726986	20.4606474980522	2.11193480195343	0.000648393220669945	0.00557684751985464	Intron (ENST00000280979.9/9472, intron 9 of 13)	AKAP6
control_d65_vs_control_VPA_high_1B	chr14_32728536_32729367	32.3341382479104	2.14059620412765	0.000361491424457402	0.00345487915907016	Intron (ENST00000280979.9/9472, intron 9 of 13)	AKAP6
control_d65_vs_control_VPA_high_1B	chr14_33206836_33208747	35.5901587535069	3.39521852257886	6.08713352461708e-14	5.58934002578681e-12	Intron (ENST00000551634.5/64067, intron 1 of 10)	NPAS3
control_d65_vs_control_VPA_high_1B	chr14_33307592_33308475	29.2562499517172	1.78734947806073	1.59605089081576e-05	0.000243807853777106	Intron (ENST00000551634.5/64067, intron 2 of 10)	NPAS3
control_d65_vs_control_VPA_high_1B	chr14_35412494_35413742	28.9601889299265	1.09865543854732	0.00607157858698263	0.0327164456007741	Distal Intergenic	NFKBIA
control_d65_vs_control_VPA_high_1B	chr14_36313124_36313796	21.5926457552159	2.05389596874563	0.00406591447196298	0.0240597181883143	Promoter (<=1kb)	MBIP
control_d65_vs_control_VPA_high_1B	chr14_36345213_36346297	22.6781909524318	1.63161927114392	0.00821498494996532	0.0412541412191603	Intron (ENST00000634305.1/ENST00000634305.1, intron 2 of 3)	MBIP
control_d65_vs_control_VPA_high_1B	chr14_36442551_36444073	50.1822981407828	1.23466781639732	0.00862287937780355	0.042784093198786	Intron (ENST00000634305.1/ENST00000634305.1, intron 2 of 3)	SFTA3
control_d65_vs_control_VPA_high_1B	chr14_38207842_38209687	65.0487359408893	1.37360489235601	0.000205785476079533	0.00216374869531887	Promoter (<=1kb)	SSTR1
control_d65_vs_control_VPA_high_1B	chr14_38737453_38738493	25.239741357315	1.41792289653073	0.00415031013152555	0.0244545910226736	Exon (ENST00000655593.1/283547, exon 9 of 9)	LINC00639
control_d65_vs_control_VPA_high_1B	chr14_38745658_38746373	21.6326690336628	4.15740328792194	8.93384280654123e-09	3.1151405074563e-07	Intron (ENST00000655593.1/283547, intron 7 of 8)	LINC00639
control_d65_vs_control_VPA_high_1B	chr14_46404885_46405809	27.1888159116599	4.19394699558107	6.55215072626308e-06	0.000112356562466894	Intron (ENST00000666179.1/100506412, intron 4 of 4)	LINC00871
control_d65_vs_control_VPA_high_1B	chr14_46840591_46841835	32.7948651055525	3.71112700012303	9.72496686182982e-09	3.36509849685528e-07	3' UTR	MDGA2
control_d65_vs_control_VPA_high_1B	chr14_50335108_50336397	83.1000991441081	1.14018997190734	2.88198213703696e-05	0.000405957893647378	Promoter (2-3kb)	CDKL1
control_d65_vs_control_VPA_high_1B	chr14_51006283_51007480	51.3121151662248	1.35661799211694	0.00025033453062852	0.00254650692519912	Intron (ENST00000298355.7/114088, intron 5 of 9)	TRIM9
control_d65_vs_control_VPA_high_1B	chr14_51430114_51431129	36.0714997050127	1.67026771853468	0.000678848925108114	0.0057938013368413	Distal Intergenic	LINC02310
control_d65_vs_control_VPA_high_1B	chr14_51846501_51847626	59.0212946974017	2.65544781910935	4.50466113326145e-11	2.49094640297125e-09	Promoter (<=1kb)	GNG2
control_d65_vs_control_VPA_high_1B	chr14_52124608_52125397	28.1514564160668	1.9340600564448	0.00716239234881572	0.0371399907804346	Intron (ENST00000555852.1/ENST00000555852.1, intron 1 of 2)	NID2
control_d65_vs_control_VPA_high_1B	chr14_52553792_52554231	30.1348318312144	1.5427652567778	0.000988084451151346	0.00785808198353213	Promoter (<=1kb)	GPR137C
control_d65_vs_control_VPA_high_1B	chr14_54818220_54819140	29.597724939897	1.81472546248259	3.58540025877493e-05	0.000490552642406141	Distal Intergenic	SAMD4A
control_d65_vs_control_VPA_high_1B	chr14_55454078_55455081	27.3410085680465	1.8630544758849	2.29824793515152e-05	0.000334804540251911	Promoter (1-2kb)	TBPL2
control_d65_vs_control_VPA_high_1B	chr14_56589886_56591104	22.3471382683805	3.26470675177985	1.6521980172572e-06	3.36423969303527e-05	Intron (ENST00000556422.5/54916, intron 3 of 14)	TMEM260
control_d65_vs_control_VPA_high_1B	chr14_56648251_56649440	99.0243753896486	2.42972875998145	4.46461526116377e-13	3.54300634495204e-11	3' UTR	TMEM260
control_d65_vs_control_VPA_high_1B	chr14_58607047_58608229	24.6459717084612	2.01716850530885	0.000117411489639132	0.0013504997295945	Distal Intergenic	DACT1
control_d65_vs_control_VPA_high_1B	chr14_58944273_58944977	29.1304002536917	1.6734227912656	4.38183581463575e-05	0.00058393037121758	Intron (ENST00000648996.1/102723742, intron 9 of 13)	LINC01500
control_d65_vs_control_VPA_high_1B	chr14_59161316_59162384	41.2135130557497	2.52672289088833	2.1330372926791e-07	5.41347337154611e-06	Intron (ENST00000666814.1/102723742, intron 3 of 3)	DAAM1
control_d65_vs_control_VPA_high_1B	chr14_59343567_59345296	35.0992251068542	1.25963157305535	0.00197779038870875	0.0136546582679066	Promoter (2-3kb)	DAAM1
control_d65_vs_control_VPA_high_1B	chr14_59869857_59871559	64.4810373087769	1.15327565631009	0.000509879665555133	0.0045865471688892	Promoter (<=1kb)	RTN1
control_d65_vs_control_VPA_high_1B	chr14_60356146_60357755	49.0592620317222	1.16351393716719	0.00865830984293777	0.0429171602543768	Distal Intergenic	LINC02322
control_d65_vs_control_VPA_high_1B	chr14_62116706_62118036	88.9744976633701	1.31535655342674	9.0926995223201e-06	0.000149467574748612	Promoter (<=1kb)	LINC00643
control_d65_vs_control_VPA_high_1B	chr14_63045087_63046452	95.7259739850411	1.22558989401557	2.99858138094666e-05	0.00042024409727657	Promoter (<=1kb)	KCNH5
control_d65_vs_control_VPA_high_1B	chr14_63223804_63224803	23.663494296463	2.21505447867278	7.83342464595038e-06	0.000131311963460446	Intron (ENST00000557447.5/57381, intron 1 of 4)	RHOJ
control_d65_vs_control_VPA_high_1B	chr14_63362265_63363095	34.8135389836721	3.53720708464366	8.73737558056339e-09	3.05625701435864e-07	Distal Intergenic	GPHB5
control_d65_vs_control_VPA_high_1B	chr14_63910993_63912139	27.8099490212301	1.55086087335674	0.00170051948139836	0.0121415385579813	Promoter (1-2kb)	SYNE2
control_d65_vs_control_VPA_high_1B	chr14_64196716_64197566	55.6837774105077	1.73510703503927	7.16453007702446e-07	1.60132348103433e-05	Promoter (<=1kb)	SYNE2
control_d65_vs_control_VPA_high_1B	chr14_65229225_65230770	80.0718230647188	1.35487166767708	1.4186601033868e-05	0.00022025250542815	Distal Intergenic	LINC02324
control_d65_vs_control_VPA_high_1B	chr14_67268315_67269055	44.1680545916384	1.92474378872867	2.57895624179645e-05	0.000369354559219165	Intron (ENST00000554911.1/64398, intron 2 of 2)	MPP5
control_d65_vs_control_VPA_high_1B	chr14_68449412_68450323	30.5243992381358	2.24373538952229	0.000553810357549096	0.00490644324856594	Intron (ENST00000479335.5/5890, intron 10 of 11)	RAD51B
control_d65_vs_control_VPA_high_1B	chr14_68476177_68477411	29.4607810054991	1.57735784775584	0.00893661984310971	0.0439661399707162	Intron (ENST00000479335.5/5890, intron 11 of 11)	RAD51B
control_d65_vs_control_VPA_high_1B	chr14_68690616_68692011	43.5596966362173	1.57935404473037	0.000384946491914212	0.0036359887883028	Intron (ENST00000488612.5/5890, intron 11 of 11)	LOC100996664
control_d65_vs_control_VPA_high_1B	chr14_68730576_68731716	71.0444278254371	1.71696756017146	7.75687062110644e-06	0.00013020386753411	Exon (ENST00000659224.1/ENST00000659224.1, exon 1 of 2)	ZFP36L1
control_d65_vs_control_VPA_high_1B	chr14_69547606_69548556	39.7491329066018	1.69725065600474	0.000194949091610887	0.00206747468299537	Distal Intergenic	CCDC177
control_d65_vs_control_VPA_high_1B	chr14_69559159_69560253	45.696054178589	1.06832712368155	0.00200243440397976	0.0137947018936223	Distal Intergenic	CCDC177
control_d65_vs_control_VPA_high_1B	chr14_69573559_69575079	55.8357641043514	1.70410097617347	7.43324199269441e-06	0.000125521987147451	Promoter (<=1kb)	CCDC177
control_d65_vs_control_VPA_high_1B	chr14_69687446_69688620	21.7290023674838	1.4479272383471	0.00673261185072881	0.0354158550241552	Intron (ENST00000342745.5/9766, intron 2 of 5)	SUSD6
control_d65_vs_control_VPA_high_1B	chr14_69708738_69709547	30.2768791579039	2.75827900508841	5.61184747406868e-05	0.000721415713268649	Exon (ENST00000342745.5/9766, exon 5 of 6)	SRSF5
control_d65_vs_control_VPA_high_1B	chr14_69842358_69843395	42.1286405708599	1.52897175584728	0.00107049872063192	0.00837551073288164	Distal Intergenic	SMOC1
control_d65_vs_control_VPA_high_1B	chr14_69852325_69853406	33.100911828178	3.13381586402409	4.35397473879669e-05	0.000580683380129903	Promoter (<=1kb)	SMOC1
control_d65_vs_control_VPA_high_1B	chr14_71776404_71777523	37.9781494599492	1.40021399259585	0.00708845350459283	0.0368405165378705	Distal Intergenic	SIPA1L1
control_d65_vs_control_VPA_high_1B	chr14_72450991_72452234	46.0600935803781	1.24579996700759	0.00035286826634332	0.00338430971481719	Promoter (2-3kb)	RGS6
control_d65_vs_control_VPA_high_1B	chr14_72478313_72479362	21.0043066362546	1.82762000721935	0.000649336539717334	0.0055832747518328	Exon (ENST00000553525.6/9628, exon 12 of 18)	RGS6
control_d65_vs_control_VPA_high_1B	chr14_72679191_72680305	37.3639521029009	2.16786212445359	9.14540023083994e-07	1.99071735577311e-05	Promoter (<=1kb)	DPF3
control_d65_vs_control_VPA_high_1B	chr14_73235348_73236121	44.6687157859996	1.55852952746828	0.00167742100174023	0.0120084452708794	Promoter (1-2kb)	PAPLN
control_d65_vs_control_VPA_high_1B	chr14_74203398_74204899	52.8010593378889	1.92436091588143	1.46353744561399e-06	3.02394626485663e-05	Distal Intergenic	VSX2
control_d65_vs_control_VPA_high_1B	chr14_75410305_75411110	23.4183708078391	1.77193765464652	0.000606244656789186	0.00527993566133501	Distal Intergenic	JDP2
control_d65_vs_control_VPA_high_1B	chr14_77084974_77086075	38.2336044935759	1.87690127720723	0.000110288592791195	0.00127994351857446	Exon (ENST00000658879.1/ENST00000658879.1, exon 2 of 2)	LINC02289
control_d65_vs_control_VPA_high_1B	chr14_77104998_77105830	20.8701443037537	3.66147623493884	3.0778855946438e-05	0.00042978718250901	5' UTR	CIPC
control_d65_vs_control_VPA_high_1B	chr14_77157893_77159225	53.6163241762221	1.2873906519941	7.02825739182196e-05	0.000873195872905821	Intron (ENST00000557752.1/57156, intron 2 of 5)	ZDHHC22
control_d65_vs_control_VPA_high_1B	chr14_77660689_77662585	29.9043039566752	2.81842873229699	2.28274623952907e-07	5.75365193912203e-06	Distal Intergenic	ALKBH1
control_d65_vs_control_VPA_high_1B	chr14_78169944_78170815	23.4188087926362	1.93716330281908	0.000784796818103576	0.00652592944152486	Promoter (<=1kb)	NRXN3
control_d65_vs_control_VPA_high_1B	chr14_78709737_78710929	41.1937544326978	3.49805969291066	0.000138300979587759	0.00155165168150053	Exon (ENST00000555680.1/ENST00000555680.1, exon 1 of 2)	NRXN3
control_d65_vs_control_VPA_high_1B	chr14_79332413_79333705	30.1369760171115	2.32026143250764	3.11280212017686e-05	0.00043390297982573	Intron (ENST00000634499.1/9369, intron 14 of 19)	NRXN3
control_d65_vs_control_VPA_high_1B	chr14_81315099_81315881	29.4524305839416	2.25283691526828	0.000305095510641837	0.00300254589575472	Intron (ENST00000555447.5/85439, intron 5 of 7)	STON2
control_d65_vs_control_VPA_high_1B	chr14_81386024_81386886	25.1454528698128	2.17307749872632	0.00136441125435341	0.0101827773178687	Intron (ENST00000555447.5/85439, intron 4 of 7)	STON2
control_d65_vs_control_VPA_high_1B	chr14_85315198_85317235	24.9480853350504	1.91055127285699	0.000306646812053473	0.00301543090941257	Distal Intergenic	LINC02329
control_d65_vs_control_VPA_high_1B	chr14_88188670_88189833	24.0348691916809	1.62443158380982	0.00230929222585627	0.0154437791215628	Intron (ENST00000340700.9/54207, intron 5 of 6)	KCNK10
control_d65_vs_control_VPA_high_1B	chr14_88310229_88311082	65.0606319793113	1.63955839222699	3.59739223568537e-06	6.65360690865592e-05	Intron (ENST00000340700.9/54207, intron 1 of 6)	KCNK10
control_d65_vs_control_VPA_high_1B	chr14_88321787_88322739	24.8661373845922	1.5953382173046	0.00334971346234601	0.0206798383358571	Promoter (<=1kb)	KCNK10
control_d65_vs_control_VPA_high_1B	chr14_88363402_88364339	37.033546209054	2.28583511620093	0.00022271675771283	0.00230997371399697	Distal Intergenic	SPATA7
control_d65_vs_control_VPA_high_1B	chr14_89121840_89122674	20.9921678284276	2.79201961466251	2.44438784068542e-05	0.00035312626892476	Downstream (2-3kb)	FOXN3
control_d65_vs_control_VPA_high_1B	chr14_89207753_89208583	29.5676640978179	2.59076473098906	0.000123222090849669	0.00140517309779293	Intron (ENST00000345097.8/1112, intron 4 of 6)	FOXN3
control_d65_vs_control_VPA_high_1B	chr14_89296098_89296924	20.8419914843013	1.83950512397585	0.00110144465154255	0.00856746052998906	Intron (ENST00000345097.8/1112, intron 3 of 6)	FOXN3
control_d65_vs_control_VPA_high_1B	chr14_89349098_89349945	50.1636551953886	3.45479579052194	2.27385387834399e-17	3.55516608025381e-15	Promoter (<=1kb)	FOXN3
control_d65_vs_control_VPA_high_1B	chr14_89399435_89400139	27.5247967993551	1.65398254841973	0.000746807853148381	0.00627071977986257	Promoter (1-2kb)	FOXN3
control_d65_vs_control_VPA_high_1B	chr14_89911161_89912395	46.5608491235701	1.25866548449178	0.000782492458861729	0.00650948302400577	Intron (ENST00000555070.1/1112, intron 2 of 3)	EFCAB11
control_d65_vs_control_VPA_high_1B	chr14_90400827_90401710	30.4737158641779	3.17346799977061	1.40259510216658e-06	2.91251795038019e-05	Promoter (<=1kb)	CALM1
control_d65_vs_control_VPA_high_1B	chr14_90641517_90642902	109.307930805926	1.72970987976772	2.23641058811247e-10	1.08156114773864e-08	Promoter (<=1kb)	LOC101928909
control_d65_vs_control_VPA_high_1B	chr14_91323588_91325013	23.6360805604572	1.34056216614771	0.00579928953895513	0.0316063420300339	Exon (ENST00000389857.11/440193, exon 12 of 30)	CCDC88C
control_d65_vs_control_VPA_high_1B	chr14_95132834_95133853	58.1522612858855	2.66188134180297	2.30067353636056e-10	1.10940993415417e-08	Promoter (<=1kb)	DICER1
control_d65_vs_control_VPA_high_1B	chr14_95256082_95256736	21.3265705613968	1.8364185666788	0.00180102634321668	0.0127089344217654	Intron (ENST00000298912.9/79789, intron 1 of 12)	CLMN
control_d65_vs_control_VPA_high_1B	chr14_95560862_95561460	22.346761647265	1.43174356655699	0.00704782344619	0.0366781206814826	Distal Intergenic	LINC02318
control_d65_vs_control_VPA_high_1B	chr14_95597147_95598343	26.6710910411671	1.32702776460806	0.0031748242099527	0.0198205038037403	Distal Intergenic	LINC02318
control_d65_vs_control_VPA_high_1B	chr14_97457983_97459284	28.0152089672681	1.81275182008644	0.000324567659577249	0.00315965360099129	Promoter (<=1kb)	LINC02325
control_d65_vs_control_VPA_high_1B	chr14_99534155_99535380	49.043053899264	1.213479890131	0.0101537670923603	0.0484654931231121	Promoter (<=1kb)	CCDC85C
control_d65_vs_control_VPA_high_1B	chr14_99663661_99664822	79.790953134099	1.07445540795194	0.00710170247608683	0.0368911005028796	Intron (ENST00000330710.9/84439, intron 6 of 8)	HHIPL1
control_d65_vs_control_VPA_high_1B	chr14_99803521_99804656	27.338955011937	1.78097614545087	0.000209253679867267	0.00219488997983795	Intron (ENST00000554479.5/2009, intron 1 of 10)	EML1
control_d65_vs_control_VPA_high_1B	chr14_99889043_99889852	30.0926353763588	1.71737548590534	0.00323132352504784	0.0200972527366716	Intron (ENST00000554479.5/2009, intron 4 of 10)	EML1
control_d65_vs_control_VPA_high_1B	chr14_100764480_100765518	87.5591462328529	1.47988849732964	0.000468166620404012	0.00428178056948784	Distal Intergenic	MEG3
control_d65_vs_control_VPA_high_1B	chr14_100829964_100831337	77.0411377865789	2.04204471635228	5.78436786357858e-08	1.67844337137254e-06	Promoter (<=1kb)	MEG3
control_d65_vs_control_VPA_high_1B	chr14_100832174_100833089	62.3199459011108	2.46124658297004	1.24192312962748e-05	0.000196376939952979	Promoter (<=1kb)	MEG3
control_d65_vs_control_VPA_high_1B	chr14_101496045_101497491	80.4696222899392	2.53824676706491	3.19465165719288e-07	7.77868607859744e-06	Distal Intergenic	LINC02314
control_d65_vs_control_VPA_high_1B	chr14_103542098_103543487	106.885041115563	1.2132076561497	3.54056986324274e-05	0.00048535169849951	Distal Intergenic	TRMT61A
control_d65_vs_control_VPA_high_1B	chr14_104169376_104170432	27.0951873776711	2.00921524586708	0.000246305809226128	0.002511641406005	Intron (ENST00000423312.6/26153, intron 5 of 14)	KIF26A
control_d65_vs_control_VPA_high_1B	chr14_105195989_105197281	63.1894973374088	1.29073873843006	0.00282592539954096	0.0181090692007488	Distal Intergenic	NUDT14
control_d65_vs_control_VPA_high_1B	chr15_23564766_23566537	73.1833459437399	2.38221863561824	9.87094892226684e-10	4.1839978393753e-08	Promoter (<=1kb)	MKRN3
control_d65_vs_control_VPA_high_1B	chr15_23860145_23860953	34.7108472345421	1.82005819211672	0.000207350311553678	0.0021787083705977	Distal Intergenic	PWRN4
control_d65_vs_control_VPA_high_1B	chr15_24856263_24856815	59.2154024895378	1.56042309283528	2.39833855310194e-05	0.000347405316964583	Promoter (<=1kb)	SNRPN
control_d65_vs_control_VPA_high_1B	chr15_24857600_24858180	33.5077197094349	1.82350906446204	5.12554419218356e-05	0.000667030116552438	Promoter (<=1kb)	SNRPN
control_d65_vs_control_VPA_high_1B	chr15_25684851_25685641	21.8173552914007	2.31867246756601	2.65709320083149e-05	0.000379047446123482	Promoter (<=1kb)	ATP10A
control_d65_vs_control_VPA_high_1B	chr15_26068744_26070556	27.8835958119217	1.48858816354367	0.000567228325794921	0.00500525889606412	Distal Intergenic	LINC02346
control_d65_vs_control_VPA_high_1B	chr15_26178365_26179336	22.2626136958511	2.79545464536082	7.10530872530481e-07	1.59022664550872e-05	Distal Intergenic	LINC00929
control_d65_vs_control_VPA_high_1B	chr15_26682017_26683110	20.2511876107849	1.59550690594909	0.00504417077520088	0.028394523687719	Intron (ENST00000628124.2/2562, intron 1 of 6)	GABRB3
control_d65_vs_control_VPA_high_1B	chr15_26771532_26773877	124.35458395868	1.50379066984256	9.96862666755944e-08	2.742486684614e-06	Promoter (<=1kb)	GABRB3
control_d65_vs_control_VPA_high_1B	chr15_27025377_27026205	30.551070186976	2.69407647389201	5.04026740752555e-08	1.48369336476756e-06	Intron (ENST00000615808.5/2567, intron 2 of 9)	GABRG3
control_d65_vs_control_VPA_high_1B	chr15_27398575_27399858	53.64126534037	4.00864988153312	2.88106181994993e-08	8.99495927266624e-07	Intron (ENST00000615808.5/2567, intron 5 of 9)	GABRG3
control_d65_vs_control_VPA_high_1B	chr15_27481722_27482739	27.6448561118042	2.64810050429115	2.40653370781727e-05	0.000348415185212101	Intron (ENST00000615808.5/2567, intron 6 of 9)	GABRG3
control_d65_vs_control_VPA_high_1B	chr15_27491688_27492918	28.6680810138746	1.80983832887052	0.000481541747450488	0.00437956222212197	Intron (ENST00000615808.5/2567, intron 6 of 9)	GABRG3
control_d65_vs_control_VPA_high_1B	chr15_28831853_28832839	42.8431402326206	1.92590780524075	1.69705764747616e-05	0.000256931460312739	Promoter (<=1kb)	PDCD6IPP2
control_d65_vs_control_VPA_high_1B	chr15_34754193_34755516	22.4678432746576	1.94257876709804	0.00077099862619323	0.00642889079086107	Promoter (<=1kb)	LOC101928174
control_d65_vs_control_VPA_high_1B	chr15_34759199_34759801	27.5263867986116	3.55816628592629	5.02015250421967e-10	2.26464657412576e-08	Intron (ENST00000503496.6/101928174, intron 1 of 2)	LOC101928174
control_d65_vs_control_VPA_high_1B	chr15_36754759_36755979	27.1900316111246	5.00196044090849	2.67744558261725e-11	1.54348775914522e-09	Promoter (<=1kb)	C15orf41
control_d65_vs_control_VPA_high_1B	chr15_36884164_36885654	22.2137904315419	2.28572959416149	6.00722998761025e-05	0.000764405252847028	Promoter (<=1kb)	LOC145845
control_d65_vs_control_VPA_high_1B	chr15_36897790_36899157	29.7289816925098	1.97625620739133	5.26742313769386e-05	0.000683308214229661	Promoter (<=1kb)	MEIS2
control_d65_vs_control_VPA_high_1B	chr15_37014988_37016008	25.7308999155657	1.26541310901547	0.00368305167567898	0.0222699369252752	Intron (ENST00000561208.6/4212, intron 8 of 11)	MIR8063
control_d65_vs_control_VPA_high_1B	chr15_37055693_37057807	71.5643620625855	2.48389297244205	7.25047171370586e-11	3.85530150504243e-09	Intron (ENST00000561208.6/4212, intron 7 of 11)	MEIS2
control_d65_vs_control_VPA_high_1B	chr15_37879735_37880914	20.592258816981	1.46378255233725	0.00227509135626968	0.0152637014608735	Distal Intergenic	TMCO5A
control_d65_vs_control_VPA_high_1B	chr15_38668473_38669664	43.3955247055684	2.81627129709055	2.03501339863767e-10	9.89926259064971e-09	Intron (ENST00000643648.1/ENST00000643648.1, intron 4 of 4)	LINC02694
control_d65_vs_control_VPA_high_1B	chr15_38690109_38691150	21.8887655292956	1.62915961238308	0.00108756742705141	0.00848119130821207	Intron (ENST00000647456.1/ENST00000647456.1, intron 2 of 6)	LINC02694
control_d65_vs_control_VPA_high_1B	chr15_39692276_39693465	59.3656876234422	1.85879649373175	1.3015858187602e-08	4.39772756994188e-07	Intron (ENST00000350221.4/161835, intron 10 of 11)	FSIP1
control_d65_vs_control_VPA_high_1B	chr15_39704297_39705274	41.6174747239577	2.14858388143866	4.85059266156357e-06	8.64655515509934e-05	Intron (ENST00000350221.4/161835, intron 10 of 11)	FSIP1
control_d65_vs_control_VPA_high_1B	chr15_39777407_39778333	25.9976378570067	1.67379084151816	0.00278209733857289	0.017880621634224	Intron (ENST00000350221.4/161835, intron 1 of 11)	LOC105370941
control_d65_vs_control_VPA_high_1B	chr15_40285159_40285965	21.913541777012	1.43907510299233	0.00898685783591551	0.0441363429947872	Promoter (2-3kb)	ANKRD63
control_d65_vs_control_VPA_high_1B	chr15_42091623_42092276	23.9880248594129	2.3791894546731	0.000832055347008041	0.00683564414608139	Promoter (2-3kb)	PLA2G4D
control_d65_vs_control_VPA_high_1B	chr15_43508842_43509196	21.4418878918626	2.48002876316189	2.79594516458683e-05	0.000395908854084192	Promoter (1-2kb)	TP53BP1
control_d65_vs_control_VPA_high_1B	chr15_45326262_45327334	50.1433788693477	3.12611035448775	1.87605836025519e-14	1.88026510750846e-12	Distal Intergenic	GATM
control_d65_vs_control_VPA_high_1B	chr15_45801643_45803072	38.2725428266156	2.35957634010792	7.28532701990793e-06	0.000123295763656555	Intron (ENST00000560705.1/105370802, intron 4 of 4)	LOC105370802
control_d65_vs_control_VPA_high_1B	chr15_47393938_47394946	21.047650656351	2.1323122642329	0.00013001166752331	0.00147056887619733	Intron (ENST00000558014.5/80031, intron 1 of 19)	SEMA6D
control_d65_vs_control_VPA_high_1B	chr15_47617866_47618987	49.498161455218	3.96779619806038	5.79944237989666e-07	1.32701519818972e-05	Intron (ENST00000558014.5/80031, intron 4 of 19)	SEMA6D
control_d65_vs_control_VPA_high_1B	chr15_47860850_47862003	71.8718031280148	1.57638489865285	4.16590906022419e-05	0.000559230510114108	Intron (ENST00000664705.1/ENST00000664705.1, intron 1 of 5)	LINC01491
control_d65_vs_control_VPA_high_1B	chr15_48190792_48192302	28.0263472146079	1.86957427887352	7.06537122014558e-05	0.000877158554680913	Promoter (<=1kb)	CTXN2
control_d65_vs_control_VPA_high_1B	chr15_51266675_51268089	35.0176580601382	1.86904279700151	2.6606846574815e-05	0.000379451168786884	Intron (ENST00000559909.1/109729174, intron 1 of 2)	CYP19A1
control_d65_vs_control_VPA_high_1B	chr15_51681026_51681917	48.2747712559904	1.25081497471315	0.000515114623356319	0.00462433020296222	Promoter (<=1kb)	SCG3
control_d65_vs_control_VPA_high_1B	chr15_51799071_51799816	21.4894856502077	2.06007797908298	0.00117639404093923	0.00903030653229674	Intron (ENST00000539962.6/29767, intron 9 of 10)	TMOD2
control_d65_vs_control_VPA_high_1B	chr15_52783339_52784651	51.8687357340375	1.52812023389546	0.00558913381885339	0.0307196633558452	Promoter (2-3kb)	ONECUT1
control_d65_vs_control_VPA_high_1B	chr15_52857706_52858849	24.2205252046575	1.73378927301135	0.00935328673449515	0.0454932364859014	Distal Intergenic	ONECUT1
control_d65_vs_control_VPA_high_1B	chr15_53520865_53521601	29.7035728223454	2.309125099309	0.000785026385359206	0.00652702159725626	Intron (ENST00000567224.1/256764, intron 2 of 2)	WDR72
control_d65_vs_control_VPA_high_1B	chr15_53559275_53560031	29.1198735293898	2.85637491406152	0.00114653518160469	0.00884783223568319	Intron (ENST00000360509.10/256764, intron 18 of 19)	WDR72
control_d65_vs_control_VPA_high_1B	chr15_53658305_53659575	25.5020133471731	1.76061538085088	0.00228649220918723	0.0153242023914953	Intron (ENST00000360509.10/256764, intron 14 of 19)	WDR72
control_d65_vs_control_VPA_high_1B	chr15_54214954_54216063	22.6941855593799	4.11664576968917	1.10871059963399e-06	2.36129298284868e-05	Intron (ENST00000647821.1/440279, intron 4 of 31)	UNC13C
control_d65_vs_control_VPA_high_1B	chr15_57132921_57133842	45.4040761978707	2.76181791560928	7.4626540651379e-13	5.6780543407213e-11	Promoter (<=1kb)	TCF12
control_d65_vs_control_VPA_high_1B	chr15_57197961_57199436	29.7164869592239	1.96393272344449	5.70885858196324e-05	0.000732045621304544	Intron (ENST00000438423.6/6938, intron 8 of 20)	TCF12
control_d65_vs_control_VPA_high_1B	chr15_57213664_57214516	22.1194296022347	2.46654174253992	3.60160286986978e-05	0.000492363959468564	Promoter (<=1kb)	TCF12
control_d65_vs_control_VPA_high_1B	chr15_57217722_57218405	22.7424109158708	1.89702154734742	0.00168564377488661	0.0120530271512087	Promoter (<=1kb)	TCF12
control_d65_vs_control_VPA_high_1B	chr15_57236367_57237752	68.2988127366671	1.82161483092279	1.14465851000303e-07	3.10073509084202e-06	Intron (ENST00000438423.6/6938, intron 12 of 20)	TCF12
control_d65_vs_control_VPA_high_1B	chr15_57259328_57260093	34.0575373774196	1.46440336705565	0.00304342762555645	0.0191927111372726	Intron (ENST00000438423.6/6938, intron 16 of 20)	TCF12
control_d65_vs_control_VPA_high_1B	chr15_57431889_57432849	22.3244500761005	1.80859592677202	0.00504286494557411	0.0283895779565212	Intron (ENST00000559194.1/84952, intron 2 of 2)	CGNL1
control_d65_vs_control_VPA_high_1B	chr15_58306835_58308020	36.9356825774779	1.64879328008168	2.34956457117576e-05	0.000341257777053262	Intron (ENST00000558239.5/8854, intron 2 of 3)	ALDH1A2
control_d65_vs_control_VPA_high_1B	chr15_60009892_60010890	48.1891284187591	3.30574408491693	5.11166424768951e-05	0.000665701849558968	Intron (ENST00000560857.1/27023, intron 1 of 3)	FOXB1
control_d65_vs_control_VPA_high_1B	chr15_60076500_60077527	42.8476695634747	2.77133488527592	5.6634381104369e-07	1.29872740545629e-05	Intron (ENST00000560503.2/ENST00000560503.2, intron 1 of 2)	FOXB1
control_d65_vs_control_VPA_high_1B	chr15_63323837_63324682	40.4624224825334	1.63588635389781	1.67904080304301e-05	0.000254609818898076	3' UTR	CA12
control_d65_vs_control_VPA_high_1B	chr15_64454162_64455200	25.0129234523338	1.76753135272162	0.00132514034210386	0.00995033247841784	3' UTR	TRIP4
control_d65_vs_control_VPA_high_1B	chr15_64635477_64636506	28.6297383915276	1.97719537463322	3.73748986171085e-05	0.000508812165521144	Intron (ENST00000326648.4/23060, intron 2 of 8)	ZNF609
control_d65_vs_control_VPA_high_1B	chr15_65049196_65050181	36.4093102840081	1.34034903983049	0.00142447047150812	0.0105366415811969	5' UTR	SLC51B
control_d65_vs_control_VPA_high_1B	chr15_65333594_65334989	50.3786700594522	1.42523442402398	0.000444174725829275	0.00409814194645759	Promoter (<=1kb)	IGDCC3
control_d65_vs_control_VPA_high_1B	chr15_65367785_65369162	60.1304612000602	1.03545365625462	0.00392081001801503	0.0233948275569824	Intron (ENST00000327987.9/9543, intron 2 of 13)	IGDCC3
control_d65_vs_control_VPA_high_1B	chr15_67501648_67502518	22.5704564355826	2.33700907526103	9.57262859064346e-06	0.000156479312753621	3' UTR	IQCH
control_d65_vs_control_VPA_high_1B	chr15_68599348_68600188	67.1494999813686	1.6462178047512	0.00957262930316517	0.0463148721195273	Intron (ENST00000566799.5/10391, intron 1 of 11)	CORO2B
control_d65_vs_control_VPA_high_1B	chr15_69530942_69532114	57.7966881342663	2.25234062279789	1.3431031675733e-10	6.80412310147565e-09	Intron (ENST00000668790.1/145837, intron 3 of 6)	DRAIC
control_d65_vs_control_VPA_high_1B	chr15_69664452_69665466	21.3673993079353	3.08299168035911	2.92767147316731e-08	9.12048128598234e-07	Intron (ENST00000645479.1/145837, intron 7 of 10)	PCAT29
control_d65_vs_control_VPA_high_1B	chr15_69885119_69886179	44.4300061430497	2.71585750427961	4.937616704583e-10	2.23094773252902e-08	Distal Intergenic	LINC00593
control_d65_vs_control_VPA_high_1B	chr15_69890824_69891956	80.7123332834838	3.37698492323787	1.69819764080348e-09	6.83344583979837e-08	Distal Intergenic	LINC00593
control_d65_vs_control_VPA_high_1B	chr15_69990654_69992153	23.6763214854534	1.4966960696965	0.00418092701163376	0.0245928319876407	Distal Intergenic	TLE3
control_d65_vs_control_VPA_high_1B	chr15_70406433_70407739	46.5181125480873	2.0415984543848	3.18298378986508e-05	0.000442571728098238	Distal Intergenic	LINC02205
control_d65_vs_control_VPA_high_1B	chr15_71186857_71188007	56.5375907768562	2.69553057418956	9.73856619948878e-10	4.13932668998569e-08	Promoter (1-2kb)	THSD4-AS1
control_d65_vs_control_VPA_high_1B	chr15_71634626_71635428	27.9894907138774	1.48649861372023	0.00772033006599709	0.0393664960518949	Intron (ENST00000355327.7/79875, intron 7 of 17)	THSD4
control_d65_vs_control_VPA_high_1B	chr15_73318386_73319208	26.002746071576	2.70697052270109	1.57510701474816e-06	3.22207576153911e-05	Downstream (<1kb)	NEO1
control_d65_vs_control_VPA_high_1B	chr15_74213768_74214520	50.2059817638375	1.35550139839969	0.00423941863250487	0.0248613287063606	Promoter (1-2kb)	STRA6
control_d65_vs_control_VPA_high_1B	chr15_74245249_74246061	36.9892368681987	2.58946128599249	5.83107234101914e-07	1.33318149660833e-05	Intron (ENST00000398814.8/80125, intron 2 of 18)	CCDC33
control_d65_vs_control_VPA_high_1B	chr15_74319526_74320411	55.0280362312169	1.61407397861561	0.00401974358620439	0.0238374219896663	Promoter (<=1kb)	CCDC33
control_d65_vs_control_VPA_high_1B	chr15_74820896_74821940	27.7812772410267	1.8271047413822	0.000340686519304264	0.00328820058474038	Promoter (<=1kb)	CPLX3
control_d65_vs_control_VPA_high_1B	chr15_77604144_77605021	43.610885939358	1.26596581028781	0.00191059501067324	0.0132841363397743	Intron (ENST00000561123.2/ENST00000561123.2, intron 3 of 3)	LINGO1
control_d65_vs_control_VPA_high_1B	chr15_79089298_79091925	54.220356124459	1.53792329621487	8.97408291684258e-06	0.000147862257312015	Promoter (<=1kb)	RASGRF1
control_d65_vs_control_VPA_high_1B	chr15_79168860_79169641	31.3787036746438	2.49932749489005	4.64515239405197e-07	1.08863455107534e-05	Intron (ENST00000671603.1/729911, intron 2 of 3)	MIR184
control_d65_vs_control_VPA_high_1B	chr15_81303571_81304642	22.6054197671965	2.37573003659748	8.2181464689974e-05	0.000998266178787859	Promoter (1-2kb)	IL16
control_d65_vs_control_VPA_high_1B	chr15_85905242_85906977	34.62328817133	2.89730928111261	6.98151906695015e-09	2.49147493720058e-07	Distal Intergenic	MIR548AP
control_d65_vs_control_VPA_high_1B	chr15_86062744_86064351	22.2629844552609	1.86159859021861	0.00150176184976059	0.0109929210040163	Distal Intergenic	AGBL1
control_d65_vs_control_VPA_high_1B	chr15_86236392_86237488	26.2063471238027	1.90117939327845	0.00118430763460016	0.009079909091513	Intron (ENST00000441037.7/123624, intron 6 of 24)	AGBL1
control_d65_vs_control_VPA_high_1B	chr15_88574506_88575269	37.9455760585881	3.57535675581463	1.56775576324991e-10	7.81901026722082e-09	Distal Intergenic	DET1
control_d65_vs_control_VPA_high_1B	chr15_88603929_88606095	74.8941501122714	1.12331861874515	0.000247688365365763	0.00252406118404066	Promoter (<=1kb)	LINC01586
control_d65_vs_control_VPA_high_1B	chr15_88610435_88611191	28.0687389942186	1.81117682492726	0.00236567680198627	0.015738493117366	Promoter (<=1kb)	MIR7-2
control_d65_vs_control_VPA_high_1B	chr15_89197431_89198164	48.8281824322255	2.17328284627364	5.2235631588311e-06	9.22726115605091e-05	3' UTR	ABHD2
control_d65_vs_control_VPA_high_1B	chr15_89367377_89367924	24.3420348349434	1.63441597641818	0.00835580157628964	0.0417718833641046	Promoter (<=1kb)	MIR9-3
control_d65_vs_control_VPA_high_1B	chr15_89368410_89369304	27.2357288523465	1.93615756812762	0.000308831077046663	0.00303360302018652	Promoter (<=1kb)	MIR9-3HG
control_d65_vs_control_VPA_high_1B	chr15_89388813_89390386	38.6493726216027	2.11929544852663	1.21409421335507e-06	2.56056734083241e-05	Promoter (1-2kb)	MIR9-3HG
control_d65_vs_control_VPA_high_1B	chr15_89395403_89396138	27.365416848783	1.88489844489554	0.000445490398942648	0.00410723934268897	Exon (ENST00000536780.6/254559, exon 7 of 7)	MIR9-3HG
control_d65_vs_control_VPA_high_1B	chr15_89398924_89400654	48.8468155154775	1.64055632975369	0.000149353631723648	0.00165589816849735	Distal Intergenic	MIR9-3HG
control_d65_vs_control_VPA_high_1B	chr15_89412489_89413585	32.4543244933529	3.59109994113502	2.71113804570868e-07	6.70955338125193e-06	Distal Intergenic	MIR9-3HG
control_d65_vs_control_VPA_high_1B	chr15_89460563_89461938	27.8989981423395	1.56363753182958	0.00371001139561173	0.022391036381157	Distal Intergenic	RHCG
control_d65_vs_control_VPA_high_1B	chr15_89469380_89470807	66.6908196009492	1.45792117945204	1.28079406419382e-05	0.000201595873289208	Downstream (<1kb)	RHCG
control_d65_vs_control_VPA_high_1B	chr15_92159993_92161135	21.6794160929227	3.21744838106214	2.49492370074846e-05	0.000359281268546848	Intron (ENST00000318445.11/28232, intron 9 of 9)	SLCO3A1
control_d65_vs_control_VPA_high_1B	chr15_92343578_92345043	20.3090427172678	1.59596334123193	0.00488189545848871	0.0276858789811923	Distal Intergenic	ST8SIA2
control_d65_vs_control_VPA_high_1B	chr15_92510076_92510877	26.2045941928189	1.83497509042188	0.00125921359634294	0.00954699705536	Distal Intergenic	C15orf32
control_d65_vs_control_VPA_high_1B	chr15_92780663_92781409	32.6876616339813	2.58035500731464	1.69000072294264e-08	5.58142617819289e-07	Exon (ENST00000562894.1/ENST00000562894.1, exon 1 of 1)	ASB9P1
control_d65_vs_control_VPA_high_1B	chr15_93061333_93062281	36.9135517563185	1.81110374750983	0.000103849746804169	0.00121569273747278	Promoter (<=1kb)	RGMA
control_d65_vs_control_VPA_high_1B	chr15_93982179_93983114	24.7096821137399	2.64490561816202	0.00274715391904222	0.0177061704272816	Exon (ENST00000558874.1/101927112, exon 4 of 9)	LINC01579
control_d65_vs_control_VPA_high_1B	chr15_96746454_96747564	36.9842157058282	1.20547042218438	0.00727443302823932	0.037591744351502	Distal Intergenic	SPATA8-AS1
control_d65_vs_control_VPA_high_1B	chr15_96869856_96871345	24.012791372142	3.47957581260294	7.44514108309892e-08	2.10668430709927e-06	Distal Intergenic	SPATA8
control_d65_vs_control_VPA_high_1B	chr15_100662939_100664136	25.2076169266507	1.5726376256054	0.00301399830700441	0.019047918920461	Distal Intergenic	ASB7
control_d65_vs_control_VPA_high_1B	chr16_1125335_1125937	22.8477805404189	2.6568885555683	3.75486676301037e-07	9.00309922707559e-06	Distal Intergenic	CACNA1H
control_d65_vs_control_VPA_high_1B	chr16_2003757_2004517	49.26127241833	1.01843975258407	0.00729559036005689	0.0376773770962668	Promoter (1-2kb)	ZNF598
control_d65_vs_control_VPA_high_1B	chr16_4561343_4562136	37.4455211122929	3.12214149856584	3.32089126589536e-09	1.26651308645719e-07	Exon (ENST00000563704.1/ENST00000563704.1, exon 1 of 1)	C16orf96
control_d65_vs_control_VPA_high_1B	chr16_8571000_8571908	24.3574973369538	1.84741513237896	0.00121770344528078	0.00928880384965151	Promoter (<=1kb)	TMEM114
control_d65_vs_control_VPA_high_1B	chr16_8685774_8686652	24.4333385703016	1.84330935090878	0.000822097395183972	0.00677449577695606	Intron (ENST00000564714.5/18, intron 1 of 5)	ABAT
control_d65_vs_control_VPA_high_1B	chr16_8712524_8714412	78.1047267797613	2.68016620280188	3.02719131153113e-16	4.00702841426616e-14	Promoter (<=1kb)	ABAT
control_d65_vs_control_VPA_high_1B	chr16_8720304_8721197	70.5141935837139	2.114657146732	3.45108202899089e-09	1.31166340674788e-07	Promoter (<=1kb)	ABAT
control_d65_vs_control_VPA_high_1B	chr16_9820173_9821727	38.8984271686843	1.7261732356084	0.00257531950335768	0.0168144779810147	Intron (ENST00000396573.6/2903, intron 11 of 13)	GRIN2A
control_d65_vs_control_VPA_high_1B	chr16_12095186_12096139	25.8647251077171	1.3636060373656	0.0084460062294945	0.042125639457186	Exon (ENST00000566957.1/ENST00000566957.1, exon 1 of 2)	SNX29
control_d65_vs_control_VPA_high_1B	chr16_12119808_12121219	55.6763693830015	1.50002028053895	1.7926645744688e-05	0.000269726403699945	Intron (ENST00000566228.6/92017, intron 11 of 20)	SNX29
control_d65_vs_control_VPA_high_1B	chr16_17083351_17084486	53.4519016709455	1.82863300178861	9.63496113619386e-05	0.00114189338334026	Exon (ENST00000623235.1/ENST00000623235.1, exon 1 of 1)	LOC102723692
control_d65_vs_control_VPA_high_1B	chr16_19746313_19747113	31.1687860051023	2.48929917726284	0.000792159067852067	0.00657097792693235	Intron (ENST00000568126.5/124152, intron 4 of 5)	IQCK
control_d65_vs_control_VPA_high_1B	chr16_19878959_19879850	27.3551949017261	1.94733645662787	5.36315630284154e-05	0.000693740676365096	Promoter (2-3kb)	GPRC5B
control_d65_vs_control_VPA_high_1B	chr16_21526794_21527704	46.9881220350307	1.74826037972197	0.00178568285552586	0.0126203195957477	Exon (ENST00000613759.1/ENST00000613759.1, exon 2 of 2)	SMG1P3
control_d65_vs_control_VPA_high_1B	chr16_23408388_23409274	31.8492098616332	1.42501311649719	0.00126648452288436	0.00959263739879573	Intron (ENST00000307149.10/91949, intron 11 of 16)	COG7
control_d65_vs_control_VPA_high_1B	chr16_23527822_23528671	21.1593522080055	2.97561833378995	3.4160946097328e-05	0.00047068343659925	Intron (ENST00000449606.5/124454, intron 7 of 8)	GGA2
control_d65_vs_control_VPA_high_1B	chr16_23786460_23787739	22.5472247019442	2.21601731609713	7.45018979694398e-05	0.000918129040097425	Distal Intergenic	CHP2
control_d65_vs_control_VPA_high_1B	chr16_24208221_24209434	25.4119528269217	2.24246972888161	5.75110387815082e-05	0.000737171782775071	Exon (ENST00000624082.1/ENST00000624082.1, exon 1 of 1)	MIR1273H
control_d65_vs_control_VPA_high_1B	chr16_24609520_24610841	50.6169622965311	1.08909239155637	0.000906963728429459	0.00732835274018083	Promoter (<=1kb)	TNRC6A
control_d65_vs_control_VPA_high_1B	chr16_25691376_25693390	49.2473540135181	1.33930716376969	0.00198031791636287	0.0136687945485015	Promoter (<=1kb)	HS3ST4
control_d65_vs_control_VPA_high_1B	chr16_29177184_29178170	23.4123972598137	2.1075438681067	0.000153210507826551	0.00169047998523229	Intron (ENST00000562902.2/653390, intron 2 of 2)	SNX29P2
control_d65_vs_control_VPA_high_1B	chr16_30417379_30418594	86.4812116239623	2.12423334227036	3.53972786753636e-10	1.64597758684839e-08	Promoter (1-2kb)	SNORA80C
control_d65_vs_control_VPA_high_1B	chr16_47965086_47966069	50.5722150139498	3.36258933303575	4.04766954149507e-16	5.27721865545373e-14	Promoter (<=1kb)	LINC02134
control_d65_vs_control_VPA_high_1B	chr16_48109255_48109996	21.9606325943935	2.21186676181759	0.000126445492127529	0.00143691728843087	Intron (ENST00000311303.7/94160, intron 16 of 28)	ABCC12
control_d65_vs_control_VPA_high_1B	chr16_49281447_49282716	161.673908758251	1.01202753575024	3.80419445059775e-06	6.98554667417887e-05	Promoter (<=1kb)	CBLN1
control_d65_vs_control_VPA_high_1B	chr16_49754491_49755934	72.9568621814226	1.1257204153757	0.000800415629370319	0.00662898438107418	Intron (ENST00000561648.5/23090, intron 3 of 8)	ZNF423
control_d65_vs_control_VPA_high_1B	chr16_50862921_50863868	21.2795337682244	2.81757893235701	2.22049763205645e-06	4.36148705251675e-05	Intron (ENST00000641266.1/ENST00000641266.1, intron 1 of 2)	LINC02168
control_d65_vs_control_VPA_high_1B	chr16_52265206_52266116	21.9198858105205	2.56265183612701	0.000471444589070083	0.00430471752715119	Intron (ENST00000568286.2/ENST00000568286.2, intron 4 of 4)	CASC22
control_d65_vs_control_VPA_high_1B	chr16_52435361_52436177	27.995333794248	1.84645230958763	0.000577042649236574	0.00507527659186914	Downstream (<1kb)	TOX3
control_d65_vs_control_VPA_high_1B	chr16_52963346_52964991	23.1808173278067	1.35765528847904	0.00927468577842906	0.0451947373728695	Distal Intergenic	LOC105371267
control_d65_vs_control_VPA_high_1B	chr16_53756195_53757168	39.4742196954132	2.57055299593257	5.1471412521095e-07	1.19170966323231e-05	Intron (ENST00000636491.1/79068, intron 2 of 9)	FTO
control_d65_vs_control_VPA_high_1B	chr16_53914520_53916109	54.0556003572146	1.548870506839	0.000131403321203553	0.00148462516825229	Intron (ENST00000636491.1/79068, intron 8 of 9)	FTO
control_d65_vs_control_VPA_high_1B	chr16_53937015_53937951	22.2189349882827	2.38540749173383	0.00883959947770545	0.043600029628926	Promoter (2-3kb)	FTO
control_d65_vs_control_VPA_high_1B	chr16_54053927_54055058	30.861133756796	2.88522617358572	6.37581464694651e-08	1.83272263390079e-06	Exon (ENST00000563879.2/ENST00000563879.2, exon 1 of 3)	FTO
control_d65_vs_control_VPA_high_1B	chr16_54374244_54375629	72.7206219042465	2.7753447340656	0.0034150571763771	0.0209928763724465	Exon (ENST00000663832.1/ENST00000663832.1, exon 3 of 3)	LINC02140
control_d65_vs_control_VPA_high_1B	chr16_56116142_56117126	34.260710590533	3.89050713974695	1.6272168355973e-09	6.56903943517576e-08	Intron (ENST00000562822.5/ENST00000562822.5, intron 1 of 2)	LOC283856
control_d65_vs_control_VPA_high_1B	chr16_56281136_56282181	57.5682996746707	1.77431922558857	9.60164608787614e-05	0.00113851623015343	Intron (ENST00000262493.12/2775, intron 3 of 8)	GNAO1
control_d65_vs_control_VPA_high_1B	chr16_56295802_56296777	45.3506712213953	1.26738868186901	0.00127309431861781	0.00963537947679053	Intron (ENST00000262493.12/2775, intron 3 of 8)	GNAO1
control_d65_vs_control_VPA_high_1B	chr16_56547070_56548029	49.3617660670606	2.26633172562176	0.000115353069270328	0.00132989260000942	Distal Intergenic	MT4
control_d65_vs_control_VPA_high_1B	chr16_56824003_56824876	33.6149687535786	1.84540801167827	0.000455201374356756	0.00418149270413906	Intron (ENST00000563858.5/9688, intron 4 of 7)	NUP93
control_d65_vs_control_VPA_high_1B	chr16_58419206_58420245	20.9006043881294	1.9593969945088	0.00335115325549689	0.020686805093063	Distal Intergenic	GINS3
control_d65_vs_control_VPA_high_1B	chr16_61023937_61025006	25.0563582676334	3.37510917369017	7.84123206418145e-07	1.73641218292192e-05	Distal Intergenic	MIR4426
control_d65_vs_control_VPA_high_1B	chr16_61836471_61837405	21.3830982174753	2.07261294540079	0.00545062545639375	0.0301303416956982	Intron (ENST00000577730.5/1006, intron 3 of 11)	CDH8
control_d65_vs_control_VPA_high_1B	chr16_65059168_65060045	50.1639591160262	2.95100720773613	4.90764383897316e-10	2.21841081343298e-08	Promoter (<=1kb)	CDH11
control_d65_vs_control_VPA_high_1B	chr16_65153684_65154795	38.4164174052079	2.58356683935436	1.91583372761045e-06	3.83717261392779e-05	Intron (ENST00000563754.2/101927650, intron 3 of 3)	LINC02126
control_d65_vs_control_VPA_high_1B	chr16_65598199_65599195	75.459975794565	1.82761711854644	0.00012924984029942	0.00146352960319956	Intron (ENST00000563811.1/ENST00000563811.1, intron 1 of 2)	LINC00922
control_d65_vs_control_VPA_high_1B	chr16_68909913_68910591	26.7212419232737	3.26808412488712	1.91494099350939e-06	3.8361463163886e-05	Promoter (<=1kb)	TANGO6
control_d65_vs_control_VPA_high_1B	chr16_72371095_72371851	22.9476716425234	1.86167810979529	0.00143047767740306	0.0105677439623329	Intron (ENST00000624829.4/101927957, intron 7 of 13)	LINC01572
control_d65_vs_control_VPA_high_1B	chr16_73052397_73053130	38.7542556925957	3.0286490542224	1.56226296770933e-05	0.000239304497895332	Intron (ENST00000397992.5/463, intron 1 of 8)	ZFHX3
control_d65_vs_control_VPA_high_1B	chr16_73329267_73330396	23.5984139970479	1.61310906637609	0.0034136094896703	0.0209865658389458	Intron (ENST00000641206.2/463, intron 3 of 17)	LINC01568
control_d65_vs_control_VPA_high_1B	chr16_73890629_73891624	31.1204374442726	2.24508054067045	4.37916742115149e-08	1.30801544611457e-06	Promoter (<=1kb)	ZFHX3
control_d65_vs_control_VPA_high_1B	chr16_75564969_75565532	23.4441501139216	2.77450740431202	2.45584014897313e-07	6.14487147404542e-06	Promoter (<=1kb)	GABARAPL2
control_d65_vs_control_VPA_high_1B	chr16_77966982_77968087	59.2078569921348	1.17205868656786	0.00123827403778439	0.00941689147889089	Intron (ENST00000302536.3/57687, intron 7 of 8)	CLEC3A
control_d65_vs_control_VPA_high_1B	chr16_79123897_79124861	43.9778285598426	2.39164845247981	1.16044786426835e-05	0.000185242344611177	Intron (ENST00000569332.5/51741, intron 7 of 7)	WWOX
control_d65_vs_control_VPA_high_1B	chr16_81158806_81159604	21.6582283844149	2.0291881468013	0.00160968965363628	0.0116296460457298	Promoter (<=1kb)	PKD1L2
control_d65_vs_control_VPA_high_1B	chr16_81415645_81416234	23.2864573731876	3.30780299719481	1.76600890789756e-06	3.56647565346719e-05	Distal Intergenic	CMIP
control_d65_vs_control_VPA_high_1B	chr16_81697135_81698603	52.2606539096798	1.67949074048402	1.09872201481653e-06	2.34377569572623e-05	Exon (ENST00000569146.1/80790, exon 2 of 2)	CMIP
control_d65_vs_control_VPA_high_1B	chr16_84362337_84363080	37.9565477213525	2.94266722714806	2.8155523733772e-06	5.36813842754467e-05	Distal Intergenic	ATP2C2
control_d65_vs_control_VPA_high_1B	chr16_84555204_84556035	38.029256703657	2.38119921344257	6.58424299170872e-06	0.000112838935989096	Promoter (1-2kb)	MEAK7
control_d65_vs_control_VPA_high_1B	chr16_85258330_85259287	41.8363761390484	1.43065118863294	0.00362007714700799	0.0219586142571645	Intron (ENST00000637419.1/23199, intron 1 of 2)	LINC00311
control_d65_vs_control_VPA_high_1B	chr16_85593327_85594615	72.8950178979788	1.09899807468657	0.00024156486253101	0.002472148934037	Exon (ENST00000567093.1/ENST00000567093.1, exon 1 of 1)	GSE1
control_d65_vs_control_VPA_high_1B	chr16_85626182_85627174	56.4046404081932	1.23238263154164	0.00122398290813426	0.00932671139501287	Intron (ENST00000637419.1/23199, intron 2 of 2)	GSE1
control_d65_vs_control_VPA_high_1B	chr17_2347540_2348649	63.5667876685591	1.31506219255645	0.000454903705982439	0.00417934026202168	Intron (ENST00000572875.1/9905, intron 1 of 2)	SGSM2
control_d65_vs_control_VPA_high_1B	chr17_2434735_2436487	87.263660073163	1.0095180041241	0.000631721789179947	0.00545953583010776	Intron (ENST00000263092.11/79066, intron 8 of 9)	LOC284009
control_d65_vs_control_VPA_high_1B	chr17_5508476_5509401	23.0073469229281	1.57143517803552	0.00187803386689498	0.0131126243994973	Intron (ENST00000544378.6/22861, intron 15 of 16)	LOC728392
control_d65_vs_control_VPA_high_1B	chr17_5718514_5719478	27.0721395171538	2.13015746487874	5.77771364202152e-05	0.000740255867139547	Distal Intergenic	LOC339166
control_d65_vs_control_VPA_high_1B	chr17_5769557_5771866	90.7705749209552	1.66012801956975	1.87288328549931e-06	3.76051820994215e-05	Promoter (<=1kb)	LOC339166
control_d65_vs_control_VPA_high_1B	chr17_5789287_5790236	35.9246560061847	2.1794794733487	0.00110182885166583	0.0085695124756809	Intron (ENST00000563763.5/339166, intron 1 of 3)	WSCD1
control_d65_vs_control_VPA_high_1B	chr17_6159955_6160699	24.4233610308152	1.94227650373769	0.000475609798724457	0.00433659200185361	Distal Intergenic	WSCD1
control_d65_vs_control_VPA_high_1B	chr17_6439598_6440478	50.7370826526707	1.96085720681593	1.6063862673177e-05	0.00024515039572601	Distal Intergenic	PIMREG
control_d65_vs_control_VPA_high_1B	chr17_9370505_9371552	20.144971348667	2.24233068782353	0.000237449389037383	0.00243666147982323	Intron (ENST00000306357.9/9482, intron 7 of 7)	STX8
control_d65_vs_control_VPA_high_1B	chr17_10025938_10026801	32.2760368249834	2.69036737522127	4.30826633396119e-08	1.28857563482345e-06	Promoter (<=1kb)	GAS7
control_d65_vs_control_VPA_high_1B	chr17_10772419_10773662	25.4807895532257	1.38051788174056	0.00818963259093003	0.0411568936010169	Intron (ENST00000647474.1/101101775, intron 3 of 5)	TMEM220-AS1
control_d65_vs_control_VPA_high_1B	chr17_13642988_13643982	40.1316681800466	1.81907552647116	0.000634199300080983	0.00547635428097031	Distal Intergenic	HS3ST3A1
control_d65_vs_control_VPA_high_1B	chr17_14330398_14332189	57.9000649716434	1.81768737779474	1.90980406196603e-06	3.82740324255233e-05	Intron (ENST00000360954.3/9953, intron 1 of 1)	MGC12916
control_d65_vs_control_VPA_high_1B	chr17_14918771_14920170	44.5131634517517	1.83374460669346	0.000790065593539358	0.00655770561725848	Intron (ENST00000660966.1/ENST00000660966.1, intron 3 of 4)	LOC101928475
control_d65_vs_control_VPA_high_1B	chr17_15179616_15180743	22.4799972744587	1.6650651747603	0.00971952767709864	0.046859557035864	Distal Intergenic	MIR4731
control_d65_vs_control_VPA_high_1B	chr17_17740793_17741999	65.8207570705762	1.08206604598235	0.00348219142945882	0.0213200937589268	Intron (ENST00000353383.6/10743, intron 2 of 5)	RAI1-AS1
control_d65_vs_control_VPA_high_1B	chr17_17792101_17793281	40.2888271450662	1.90330633629008	1.66183989557295e-05	0.000252289342641752	5' UTR	RAI1
control_d65_vs_control_VPA_high_1B	chr17_17868616_17869746	28.2521801480664	1.52806166171575	0.00728449714697762	0.0376327615067614	Promoter (2-3kb)	TOM1L2
control_d65_vs_control_VPA_high_1B	chr17_17928302_17929385	24.1084861279529	1.41132099682852	0.00917033029435433	0.0448110960377095	Intron (ENST00000581396.5/146691, intron 1 of 13)	TOM1L2
control_d65_vs_control_VPA_high_1B	chr17_20095058_20096035	23.2556732963452	2.13757389421913	0.000153946957402348	0.00169766610446028	Promoter (<=1kb)	SPECC1
control_d65_vs_control_VPA_high_1B	chr17_21370326_21371016	35.0453372789594	1.44657660972864	0.00297506993171436	0.0188610956178454	Distal Intergenic	KCNJ12
control_d65_vs_control_VPA_high_1B	chr17_27345048_27345850	41.3858443347509	1.41947853448912	0.000336363719359557	0.00325388275825935	Intron (ENST00000666005.1/ENST00000666005.1, intron 2 of 3)	WSB1
control_d65_vs_control_VPA_high_1B	chr17_27915497_27916381	24.6333979470093	1.98084405692812	0.000649831179395819	0.0055860822030116	Distal Intergenic	LINC01992
control_d65_vs_control_VPA_high_1B	chr17_28967788_28969115	48.4645329657984	1.24793730314302	0.000810057846709447	0.00669560340080278	Intron (ENST00000580241.5/51268, intron 2 of 9)	SEZ6
control_d65_vs_control_VPA_high_1B	chr17_29038000_29039023	41.4421967095418	2.19313065277995	1.48853375223475e-05	0.00022982979581209	Intron (ENST00000580241.5/51268, intron 2 of 9)	PIPOX
control_d65_vs_control_VPA_high_1B	chr17_31143876_31144999	28.6657043499674	1.93420407269627	0.00798933099977678	0.0403998066430293	Intron (ENST00000487476.5/4763, intron 1 of 13)	NF1
control_d65_vs_control_VPA_high_1B	chr17_32258201_32259053	22.3691991125807	1.4943040104684	0.00939141948665554	0.0456368008138195	Exon (ENST00000653149.1/ENST00000653149.1, exon 2 of 2)	RHBDL3
control_d65_vs_control_VPA_high_1B	chr17_32518799_32520680	125.10516938076	1.25829457041046	1.97007747842594e-05	0.000292795843595241	Exon (ENST00000584219.1/ENST00000584219.1, exon 1 of 2)	MYO1D
control_d65_vs_control_VPA_high_1B	chr17_32545852_32546696	39.1992975283703	2.37506689589707	9.31461428887947e-08	2.58072425299648e-06	Intron (ENST00000318217.10/4642, intron 21 of 21)	MYO1D
control_d65_vs_control_VPA_high_1B	chr17_34156776_34158217	33.9429729228444	1.5846333416608	0.00410735101854934	0.024255235836826	Promoter (<=1kb)	ASIC2
control_d65_vs_control_VPA_high_1B	chr17_40350145_40351680	66.5816235746653	1.71891517286672	1.45503219422652e-06	3.0091798712551e-05	Promoter (<=1kb)	RARA
control_d65_vs_control_VPA_high_1B	chr17_41704952_41706323	40.4292949121074	1.17749859772282	0.00679318085270343	0.0356662108002889	Distal Intergenic	GAST
control_d65_vs_control_VPA_high_1B	chr17_41710445_41711191	20.4028714549579	2.75176149160826	2.36592240734124e-06	4.60898239239564e-05	Promoter (1-2kb)	GAST
control_d65_vs_control_VPA_high_1B	chr17_43033975_43034960	43.3514720770097	1.31692723391833	0.00352524673450181	0.021518934241847	Distal Intergenic	RND2
control_d65_vs_control_VPA_high_1B	chr17_43036020_43036771	52.0345190010864	1.43367114271978	0.00545160235521666	0.0301349062225278	Distal Intergenic	RND2
control_d65_vs_control_VPA_high_1B	chr17_43431280_43432041	21.0057374673643	2.18120285227703	7.93750600437479e-05	0.000968781039581275	Distal Intergenic	MIR2117HG
control_d65_vs_control_VPA_high_1B	chr17_48011270_48012660	57.6588076559062	1.20481668550596	0.00187138831559767	0.013080426899058	Distal Intergenic	COPZ2
control_d65_vs_control_VPA_high_1B	chr17_48149190_48149895	21.9293413409387	2.52078448161045	6.28336211354602e-05	0.00079415246350945	Intron (ENST00000336915.11/8631, intron 11 of 12)	MIR1203
control_d65_vs_control_VPA_high_1B	chr17_50100962_50102470	43.1804967264244	1.10906035438447	0.00359462348129679	0.0218407696821784	Promoter (1-2kb)	PDK2
control_d65_vs_control_VPA_high_1B	chr17_50565680_50566506	42.5292181098833	5.19715047221324	2.24575019007405e-15	2.57288113442817e-13	Promoter (2-3kb)	CACNA1G
control_d65_vs_control_VPA_high_1B	chr17_57072054_57072806	33.0452030541878	2.06149727207648	8.65154547036275e-05	0.00104303053119742	Exon (ENST00000656535.1/ENST00000656535.1, exon 3 of 3)	AKAP1
control_d65_vs_control_VPA_high_1B	chr17_57271505_57272289	27.0016016462583	2.05966762742554	9.25092011455213e-05	0.00110280566718793	Intron (ENST00000416426.6/124540, intron 5 of 13)	MSI2
control_d65_vs_control_VPA_high_1B	chr17_57286244_57287012	30.31519393858	2.04544714820788	0.000744462141105951	0.00625497555343955	Promoter (<=1kb)	MSI2
control_d65_vs_control_VPA_high_1B	chr17_57294675_57296024	22.5747209702156	3.04441630688849	1.35985113545107e-05	0.000212329352586849	Promoter (<=1kb)	MSI2
control_d65_vs_control_VPA_high_1B	chr17_57313041_57313995	20.3617984067281	2.62349770385938	7.5267447599791e-05	0.000925960541176742	Intron (ENST00000416426.6/124540, intron 5 of 13)	MSI2
control_d65_vs_control_VPA_high_1B	chr17_57518362_57519148	25.6859972233063	1.49489871545789	0.000721681543833149	0.00609775480171928	Intron (ENST00000416426.6/124540, intron 6 of 13)	LOC101927557
control_d65_vs_control_VPA_high_1B	chr17_57545211_57546346	21.3614974354078	1.58417646329304	0.00894205746980376	0.0439824172413704	Intron (ENST00000416426.6/124540, intron 7 of 13)	LOC101927557
control_d65_vs_control_VPA_high_1B	chr17_57761706_57763673	37.1245622041768	2.35344569319148	2.11130425604515e-05	0.000311324845199775	Distal Intergenic	CCDC182
control_d65_vs_control_VPA_high_1B	chr17_57802915_57803809	22.0890535089148	1.87449711793372	0.00213258171145609	0.0145013519529242	Intron (ENST00000581805.5/ENST00000581805.5, intron 2 of 2)	MRPS23
control_d65_vs_control_VPA_high_1B	chr17_58328412_58329139	36.8239853073895	2.37805011082544	2.18996462785085e-06	4.31171050571413e-05	Promoter (<=1kb)	TSPOAP1-AS1
control_d65_vs_control_VPA_high_1B	chr17_59165851_59166573	37.5837360751226	1.2957366981649	0.0047884458938147	0.0272871058015089	Intron (ENST00000262293.8/55771, intron 1 of 9)	PRR11
control_d65_vs_control_VPA_high_1B	chr17_59547032_59548104	46.0744902920001	3.42545841462889	4.50329777231852e-13	3.56660467906479e-11	Distal Intergenic	DHX40
control_d65_vs_control_VPA_high_1B	chr17_62644430_62645123	28.4420333917689	2.16526808339962	0.00138854995385476	0.0103234206952274	Intron (ENST00000303375.10/9902, intron 1 of 29)	MRC2
control_d65_vs_control_VPA_high_1B	chr17_62705567_62706439	45.8044959388986	1.87598964281241	6.00024014212635e-05	0.000763759575616065	Promoter (<=1kb)	LOC105371855
control_d65_vs_control_VPA_high_1B	chr17_62869556_62871007	67.5104072889647	2.9520852887859	1.02350366653213e-06	2.19861381366934e-05	Distal Intergenic	MARCHF10-DT
control_d65_vs_control_VPA_high_1B	chr17_63136285_63137480	25.5854619651842	1.58195821808082	0.0051815113861191	0.028991623688596	Intron (ENST00000424789.6/26115, intron 3 of 24)	TANC2
control_d65_vs_control_VPA_high_1B	chr17_63151754_63152687	48.7769103316328	1.0612214746808	0.00368727610332329	0.0222889120654098	Exon (ENST00000581424.1/ENST00000581424.1, exon 1 of 1)	TANC2
control_d65_vs_control_VPA_high_1B	chr17_65243668_65244705	27.3404397105063	1.37453522281508	0.00278370261564727	0.0178885035814562	Distal Intergenic	RGS9
control_d65_vs_control_VPA_high_1B	chr17_65545665_65546784	74.1545759571013	1.65455678704149	2.8331777966555e-05	0.00040011243741091	Intron (ENST00000307078.10/8313, intron 3 of 10)	AXIN2
control_d65_vs_control_VPA_high_1B	chr17_66364920_66366235	20.8803606396943	1.99651945340049	0.000499650086887138	0.00451101658607806	Intron (ENST00000413366.8/5578, intron 2 of 16)	PRKCA-AS1
control_d65_vs_control_VPA_high_1B	chr17_66964168_66966294	107.912373512276	1.15910457024237	1.23835766062831e-05	0.00019584422547847	Promoter (<=1kb)	CACNG4
control_d65_vs_control_VPA_high_1B	chr17_67441190_67442184	26.9608838727585	1.5680438420808	0.000851901690902404	0.00696681959610398	Intron (ENST00000581322.6/26207, intron 1 of 8)	PITPNC1
control_d65_vs_control_VPA_high_1B	chr17_68321547_68322547	31.2868815046651	1.88649513225241	0.000111527434615609	0.00129206415882392	Intron (ENST00000448504.6/22901, intron 2 of 11)	ARSG
control_d65_vs_control_VPA_high_1B	chr17_69466809_69467831	31.9929509227808	1.69575594450509	0.00142630025408449	0.0105458718315614	Intron (ENST00000590474.7/5608, intron 1 of 11)	LOC105371880
control_d65_vs_control_VPA_high_1B	chr17_71032515_71034020	113.772637346945	2.05902847564451	1.96708828919728e-10	9.6039966225403e-09	Distal Intergenic	CASC17
control_d65_vs_control_VPA_high_1B	chr17_72150787_72152198	39.7631185528532	1.54873007762233	0.000298708708012016	0.00295120117496969	Intron (ENST00000628742.2/400618, intron 2 of 6)	SOX9-AS1
control_d65_vs_control_VPA_high_1B	chr17_72219134_72220505	59.4908717830401	1.73373315363552	9.06045732184474e-05	0.00108432846567837	Exon (ENST00000623935.1/ENST00000623935.1, exon 3 of 3)	SOX9-AS1
control_d65_vs_control_VPA_high_1B	chr17_72341948_72343636	62.6741360888781	1.6498703124675	5.44840462733383e-06	9.57269230425252e-05	Promoter (<=1kb)	LINC02003
control_d65_vs_control_VPA_high_1B	chr17_73410544_73411696	38.5889194120307	2.05962177505046	0.00321399153498889	0.0200155062959667	Promoter (2-3kb)	SDK2
control_d65_vs_control_VPA_high_1B	chr17_73510639_73511652	24.5673888625718	2.0724581915051	1.857037351069e-05	0.000278089669310548	Promoter (1-2kb)	LOC101928251
control_d65_vs_control_VPA_high_1B	chr17_73786116_73787511	32.1085903476214	1.59832106030349	0.00406111459218032	0.0240341690266232	Promoter (<=1kb)	LINC02092
control_d65_vs_control_VPA_high_1B	chr17_74513987_74515029	33.295318865539	2.47279996692575	7.54549031956371e-10	3.28348245632776e-08	Distal Intergenic	CD300LB
control_d65_vs_control_VPA_high_1B	chr17_76697471_76698462	24.7010605843245	1.40986093111454	0.00983202827184804	0.047286436533567	Intron (ENST00000355797.7/439921, intron 1 of 3)	MXRA7
control_d65_vs_control_VPA_high_1B	chr17_77570890_77572116	27.1615803293094	2.62662433291385	7.37666517159641e-06	0.000124672208164227	Exon (ENST00000623348.1/ENST00000623348.1, exon 1 of 1)	LOC100507351
control_d65_vs_control_VPA_high_1B	chr17_77883950_77884455	23.4061122610429	1.97037974173775	0.000164988894126321	0.00179785044760608	Promoter (<=1kb)	LINC01973
control_d65_vs_control_VPA_high_1B	chr17_77887244_77888574	41.8932611340221	1.86389226081599	2.13938322172768e-06	4.23050776429447e-05	Distal Intergenic	LINC01973
control_d65_vs_control_VPA_high_1B	chr17_81409076_81410029	34.0294913000181	1.49206206828554	0.00301331006781853	0.0190453807476015	Intron (ENST00000584436.7/57597, intron 2 of 28)	MIR4740
control_d65_vs_control_VPA_high_1B	chr18_985085_986471	35.2758386898722	2.22935134603093	4.57429757320666e-07	1.0740493804811e-05	Intron (ENST00000577719.5/ENST00000577719.5, intron 1 of 3)	LINC01904
control_d65_vs_control_VPA_high_1B	chr18_4119096_4119807	25.7364681036049	2.75207790006799	1.20547438177501e-05	0.000191387779634694	Intron (ENST00000315677.8/9229, intron 2 of 12)	DLGAP1
control_d65_vs_control_VPA_high_1B	chr18_4124944_4125699	21.9805703533291	2.14502643673489	0.000350026977944285	0.00336191172947634	Intron (ENST00000315677.8/9229, intron 2 of 12)	DLGAP1
control_d65_vs_control_VPA_high_1B	chr18_5196200_5197808	57.2767860722672	1.17266836870641	0.00292564355583258	0.0186158300705737	Promoter (<=1kb)	AKAIN1
control_d65_vs_control_VPA_high_1B	chr18_7115966_7116737	29.4647860125362	1.65679834932881	0.000807326350589152	0.00667789538110146	Promoter (1-2kb)	LAMA1
control_d65_vs_control_VPA_high_1B	chr18_7322950_7323740	22.2682117340772	2.76790204940156	0.00010314314838942	0.0012088408524215	Distal Intergenic	LRRC30
control_d65_vs_control_VPA_high_1B	chr18_7618578_7619557	21.9103029964642	1.58015266872194	0.00165747010906217	0.0118989497393081	Intron (ENST00000580170.5/5797, intron 1 of 32)	PTPRM
control_d65_vs_control_VPA_high_1B	chr18_8084088_8084702	23.4623037038732	3.03636475466372	0.000126047429537084	0.00143370140867851	Promoter (<=1kb)	PTPRM
control_d65_vs_control_VPA_high_1B	chr18_8174491_8175424	20.0811059170777	3.29568093767898	3.68484635013074e-08	1.12078025711499e-06	Intron (ENST00000580170.5/5797, intron 14 of 32)	PTPRM
control_d65_vs_control_VPA_high_1B	chr18_8288268_8289158	23.4235984973342	1.94178078235897	0.000165160168692236	0.00179922503897058	Intron (ENST00000580170.5/5797, intron 19 of 32)	PTPRM
control_d65_vs_control_VPA_high_1B	chr18_8661653_8663178	71.2615521011308	1.67926581567414	1.09649483595534e-06	2.33960972515366e-05	Distal Intergenic	RAB12
control_d65_vs_control_VPA_high_1B	chr18_8890802_8891596	30.4713155246686	2.69515628146873	2.66418644254535e-05	0.000379869044113901	Distal Intergenic	MTCL1
control_d65_vs_control_VPA_high_1B	chr18_9737349_9738239	51.1432116028985	3.56544823238098	2.32223511218379e-12	1.61033097550179e-10	Intron (ENST00000578734.5/11031, intron 1 of 5)	RAB31
control_d65_vs_control_VPA_high_1B	chr18_10403191_10404720	45.8056817874251	1.76117729703636	5.98459929732315e-06	0.000103884180731816	Downstream (<1kb)	LINC01254
control_d65_vs_control_VPA_high_1B	chr18_10410667_10411565	20.9924977457206	1.62561837035238	0.00337249750600359	0.0207953814789134	Promoter (2-3kb)	LINC01254
control_d65_vs_control_VPA_high_1B	chr18_13471943_13472912	47.7362901469455	1.17444938534376	0.0029134525603137	0.0185524713013351	Exon (ENST00000624889.1/ENST00000624889.1, exon 1 of 1)	LDLRAD4
control_d65_vs_control_VPA_high_1B	chr18_13610978_13612539	47.2851305574989	1.38928406642028	9.50805764436842e-05	0.00112925490930107	Promoter (<=1kb)	MIR4526
control_d65_vs_control_VPA_high_1B	chr18_21264483_21265252	44.0508873282484	1.73372583118025	4.10114304130133e-05	0.000551613562317829	Intron (ENST00000584446.5/80000, intron 1 of 14)	GREB1L
control_d65_vs_control_VPA_high_1B	chr18_21330226_21331756	34.8866795628251	1.43030358781188	0.00426855763084634	0.0249939753114612	Intron (ENST00000584446.5/80000, intron 1 of 14)	GREB1L
control_d65_vs_control_VPA_high_1B	chr18_21682205_21683154	51.3676322325436	1.38439936539332	0.000179310898225249	0.00192736494756878	Promoter (<=1kb)	MIR320C1
control_d65_vs_control_VPA_high_1B	chr18_22469882_22470880	20.1837552645202	1.58747219813161	0.00337034332906615	0.0207846701090803	Distal Intergenic	CTAGE1
control_d65_vs_control_VPA_high_1B	chr18_22821638_22822756	44.2883303957873	1.99263099428258	6.57032024202636e-06	0.000112639065958633	Intron (ENST00000583700.5/5932, intron 1 of 4)	RBBP8
control_d65_vs_control_VPA_high_1B	chr18_23337721_23338534	31.8772149069229	1.38938975164742	0.001224878578878	0.00933246618196814	Intron (ENST00000581444.5/85019, intron 13 of 15)	TMEM241
control_d65_vs_control_VPA_high_1B	chr18_24817399_24818300	27.923213806091	2.30265706311402	2.01476857721906e-06	4.01917398973592e-05	Intron (ENST00000661125.1/105372028, intron 2 of 3)	LOC105372028
control_d65_vs_control_VPA_high_1B	chr18_25175917_25176931	21.1026249731424	2.46898651778446	2.55668224579613e-06	4.93430515026117e-05	Intron (ENST00000361524.8/25925, intron 5 of 7)	ZNF521
control_d65_vs_control_VPA_high_1B	chr18_26057208_26057902	22.1195291567861	1.93569372356224	0.00102160452121743	0.00806577586782086	3' UTR	SS18
control_d65_vs_control_VPA_high_1B	chr18_27661220_27662556	70.4436420714694	4.42561883107534	3.19768018560555e-10	1.49916452088364e-08	Distal Intergenic	LOC105372038
control_d65_vs_control_VPA_high_1B	chr18_28036418_28037098	27.0469542913504	2.45047802885761	3.57846975548956e-06	6.62352490137253e-05	Promoter (<=1kb)	CDH2
control_d65_vs_control_VPA_high_1B	chr18_28065050_28066256	21.1830011170751	1.90786740161199	0.0010784754826195	0.00842337395910614	Intron (ENST00000269141.8/1000, intron 2 of 15)	CDH2
control_d65_vs_control_VPA_high_1B	chr18_28086121_28087652	82.4626345325294	2.13219864229001	1.16427595150351e-12	8.5203287014838e-11	Intron (ENST00000269141.8/1000, intron 2 of 15)	CDH2
control_d65_vs_control_VPA_high_1B	chr18_31244672_31245471	22.1442468614663	1.41209014361656	0.00513344077974229	0.0287800119717216	Distal Intergenic	DSG1
control_d65_vs_control_VPA_high_1B	chr18_31775945_31776598	21.4462638350909	2.23956027315377	0.00478132531936709	0.0272550992855381	Distal Intergenic	SLC25A52
control_d65_vs_control_VPA_high_1B	chr18_32334758_32336056	43.4509317100298	1.32849619794943	0.00066215813378902	0.0056771139021249	Intron (ENST00000399218.8/64762, intron 2 of 5)	GAREM1
control_d65_vs_control_VPA_high_1B	chr18_32802496_32804043	23.5211306759853	1.69516167613806	0.00165725198086099	0.0118978122727236	Distal Intergenic	KLHL14
control_d65_vs_control_VPA_high_1B	chr18_33231629_33232677	20.8256621366816	1.42922170340147	0.00894953535132989	0.0440053166710649	Intron (ENST00000403303.5/374864, intron 14 of 21)	CCDC178
control_d65_vs_control_VPA_high_1B	chr18_34158822_34159950	69.2037742622345	1.40734542486728	1.22296586682356e-05	0.000193732798544031	Promoter (<=1kb)	NOL4
control_d65_vs_control_VPA_high_1B	chr18_34221975_34223462	77.7754019422929	1.74908988732869	5.6288399175711e-08	1.63808280614325e-06	Promoter (<=1kb)	NOL4
control_d65_vs_control_VPA_high_1B	chr18_34224348_34225575	126.261964279468	1.6793096291267	4.51821312295799e-11	2.49774740213306e-09	Promoter (<=1kb)	NOL4
control_d65_vs_control_VPA_high_1B	chr18_34480016_34480801	20.2260260294453	3.26739274733529	0.00016605293191436	0.00180737033936118	Distal Intergenic	DTNA
control_d65_vs_control_VPA_high_1B	chr18_35050116_35051439	27.4545125323369	1.86294206799698	0.000292817061114663	0.0029023423759429	Intron (ENST00000591734.5/10982, intron 2 of 5)	MAPRE2
control_d65_vs_control_VPA_high_1B	chr18_36254990_36255807	44.3865084763965	2.43668918798784	1.2148339989256e-05	0.000192628299673737	Promoter (1-2kb)	MOCOS
control_d65_vs_control_VPA_high_1B	chr18_36493325_36494674	35.3566027160762	2.03949573942511	6.33468450556066e-07	1.43368984723603e-05	Intron (ENST00000257209.8/80206, intron 3 of 24)	FHOD3
control_d65_vs_control_VPA_high_1B	chr18_36564521_36565583	21.0269097279414	1.69505098294586	0.00206909729680787	0.0141619320078785	Intron (ENST00000257209.8/80206, intron 5 of 24)	FHOD3
control_d65_vs_control_VPA_high_1B	chr18_37334555_37335657	25.0562563202443	2.34377259354137	3.22855074849003e-06	6.04999696849495e-05	Intron (ENST00000420428.7/56853, intron 2 of 12)	LOC105372068
control_d65_vs_control_VPA_high_1B	chr18_37402783_37403847	21.316542490006	1.61115001030291	0.0029557120080208	0.0187616419662766	Intron (ENST00000420428.7/56853, intron 2 of 12)	CELF4
control_d65_vs_control_VPA_high_1B	chr18_37450078_37451101	56.3489756859907	2.4209242782438	2.00428852245988e-08	6.51211834708623e-07	Intron (ENST00000420428.7/56853, intron 2 of 12)	CELF4
control_d65_vs_control_VPA_high_1B	chr18_39380215_39381513	53.8235371238493	2.40481855400756	1.84005366560501e-07	4.73850068497218e-06	Intron (ENST00000669399.1/647946, intron 2 of 3)	MIR924HG
control_d65_vs_control_VPA_high_1B	chr18_41714055_41715191	26.9103387464579	2.60596497741376	0.000199056775625819	0.00210476698636315	Distal Intergenic	KC6
control_d65_vs_control_VPA_high_1B	chr18_41921766_41923262	30.6860727244194	2.47668853227611	1.3482267413723e-06	2.8131003557212e-05	Distal Intergenic	PIK3C3
control_d65_vs_control_VPA_high_1B	chr18_42977599_42978828	25.3129638246053	1.56928119738603	0.00112536676675777	0.00871958035937863	Intron (ENST00000326695.10/6014, intron 2 of 4)	RIT2
control_d65_vs_control_VPA_high_1B	chr18_43279081_43279789	23.2120728197262	1.86772476424129	0.000323305096787887	0.00315018220950575	Promoter (1-2kb)	SYT4
control_d65_vs_control_VPA_high_1B	chr18_44516364_44517240	30.7330533997404	2.31679510364639	0.000283837532189945	0.00282753868831826	Intron (ENST00000664723.1/101927921, intron 1 of 4)	LINC01478
control_d65_vs_control_VPA_high_1B	chr18_44723173_44724183	21.5400334032658	2.07872254284662	0.000376862749110325	0.00357294730998201	Intron (ENST00000426838.8/26040, intron 2 of 3)	SETBP1
control_d65_vs_control_VPA_high_1B	chr18_44743632_44745269	93.0840165347785	2.63056275756219	7.91101621876187e-13	5.97812524315885e-11	Intron (ENST00000426838.8/26040, intron 2 of 3)	SETBP1
control_d65_vs_control_VPA_high_1B	chr18_44945796_44946753	28.6790445408249	1.31805265949443	0.0088542534425924	0.043651786985706	Intron (ENST00000649279.2/26040, intron 3 of 5)	MIR4319
control_d65_vs_control_VPA_high_1B	chr18_45016261_45017335	29.993949089541	1.11232954460183	0.00940034217953009	0.0456686231111692	Intron (ENST00000649279.2/26040, intron 4 of 5)	MIR4319
control_d65_vs_control_VPA_high_1B	chr18_45237328_45238374	20.3199074989873	2.66251622931064	1.91494474671229e-05	0.00028552361803686	Intron (ENST00000586448.5/8170, intron 1 of 20)	SLC14A2
control_d65_vs_control_VPA_high_1B	chr18_45291687_45292756	51.8747808269442	4.04602631674748	1.27271748836264e-20	3.37381835685025e-18	Intron (ENST00000586448.5/8170, intron 1 of 20)	SLC14A2
control_d65_vs_control_VPA_high_1B	chr18_45362874_45363929	34.091158771326	3.22489509913325	1.65182470926162e-11	9.8854592762674e-10	Intron (ENST00000586448.5/8170, intron 1 of 20)	SLC14A2-AS1
control_d65_vs_control_VPA_high_1B	chr18_45415528_45416807	28.2761192321066	3.08671503627702	5.12352958533851e-10	2.30971309072567e-08	Intron (ENST00000586448.5/8170, intron 1 of 20)	SLC14A2-AS1
control_d65_vs_control_VPA_high_1B	chr18_45449770_45450856	21.1511965562558	2.08638916440385	0.00052088225363684	0.00466824590808297	Promoter (2-3kb)	SLC14A2-AS1
control_d65_vs_control_VPA_high_1B	chr18_46335469_46336174	43.1035515547643	1.24304571524566	0.00787263902587621	0.0399627995022362	Promoter (1-2kb)	RNF165
control_d65_vs_control_VPA_high_1B	chr18_47995753_47996752	34.7447751985262	2.02478344485082	2.65937924724728e-05	0.000379325164301528	Distal Intergenic	SMAD2
control_d65_vs_control_VPA_high_1B	chr18_48023306_48024206	28.9484379303079	1.11940337877969	0.00726849188754193	0.0375695486766908	Downstream (2-3kb)	SMAD2
control_d65_vs_control_VPA_high_1B	chr18_48186021_48187196	42.2952275787735	1.70945701490066	1.29898066237436e-06	2.72174268574394e-05	Intron (ENST00000590800.6/201501, intron 2 of 4)	ZBTB7C
control_d65_vs_control_VPA_high_1B	chr18_48314524_48315206	24.6742411963259	1.62422248715503	0.00490831450553696	0.0278029230446303	Intron (ENST00000590800.6/201501, intron 2 of 4)	ZBTB7C
control_d65_vs_control_VPA_high_1B	chr18_48545575_48546366	31.2761581434345	1.33433304434108	0.00347650591644473	0.0212944399575846	Intron (ENST00000256413.8/9811, intron 1 of 11)	CTIF
control_d65_vs_control_VPA_high_1B	chr18_48859291_48860699	131.530670593753	1.63666130671594	1.02685326084877e-07	2.81566836502283e-06	3' UTR	SMAD7
control_d65_vs_control_VPA_high_1B	chr18_49518920_49519942	52.7282985019169	1.28424999792125	0.002310601642165	0.0154483899570373	Distal Intergenic	RPL17
control_d65_vs_control_VPA_high_1B	chr18_49612617_49614124	56.6644946653331	1.01248584417154	0.00145445810698741	0.0107119520373707	Distal Intergenic	LIPG
control_d65_vs_control_VPA_high_1B	chr18_51167909_51168732	37.792094527708	2.70979254766177	2.87632171927277e-07	7.08405274833394e-06	Distal Intergenic	MEX3C
control_d65_vs_control_VPA_high_1B	chr18_51654382_51655521	29.378582137838	1.31354259405783	0.006236417611311	0.0333991423696093	Distal Intergenic	LINC01630
control_d65_vs_control_VPA_high_1B	chr18_52677797_52679004	22.2097231413619	1.95105554197441	0.000264129257602474	0.00266220603630412	Intron (ENST00000442544.7/1630, intron 1 of 28)	DCC
control_d65_vs_control_VPA_high_1B	chr18_54246525_54247796	44.8432287977487	1.3743205581417	0.00421660384752925	0.0247566668803807	Distal Intergenic	POLI
control_d65_vs_control_VPA_high_1B	chr18_54717620_54718566	20.471153568733	1.99783940981737	0.000407071273498817	0.00380976667074625	Promoter (<=1kb)	RAB27B
control_d65_vs_control_VPA_high_1B	chr18_56152083_56153215	22.7965790398975	1.69752729692988	0.00226798296526863	0.0152242089165384	Intron (ENST00000382897.2/642484, intron 3 of 8)	LINC01539
control_d65_vs_control_VPA_high_1B	chr18_56873380_56874281	33.1071175278308	1.90240581006733	0.00094996680869106	0.00760988882641463	Exon (ENST00000586391.1/ENST00000586391.1, exon 1 of 2)	WDR7
control_d65_vs_control_VPA_high_1B	chr18_57209820_57210924	22.5499440404366	2.31876594791208	8.50362397106031e-05	0.00102799479935415	Distal Intergenic	LINC02565
control_d65_vs_control_VPA_high_1B	chr18_57248480_57249571	22.7693003071217	3.81493711506521	6.36004912924742e-05	0.000802386148800048	Distal Intergenic	LINC02565
control_d65_vs_control_VPA_high_1B	chr18_57276590_57277581	36.115105329977	3.42006508600718	8.73544255065681e-09	3.05611711250129e-07	Distal Intergenic	ST8SIA3
control_d65_vs_control_VPA_high_1B	chr18_57352308_57354539	84.5817284507797	1.36187463286725	0.000175416976250382	0.00189227638082338	Promoter (<=1kb)	ST8SIA3
control_d65_vs_control_VPA_high_1B	chr18_57437774_57438559	43.3256659302281	1.66446970571768	0.000329829167460113	0.00320094697050966	Promoter (2-3kb)	ONECUT2
control_d65_vs_control_VPA_high_1B	chr18_58101184_58102334	21.6909500756802	2.44803238556224	1.66936220971752e-06	3.39364347397868e-05	Intron (ENST00000400345.8/23327, intron 1 of 30)	NEDD4L
control_d65_vs_control_VPA_high_1B	chr18_58447228_58448016	30.8183981072522	1.05352621857044	0.00983671626026756	0.0473032768760384	Intron (ENST00000667453.1/ENST00000667453.1, intron 1 of 2)	MIR122
control_d65_vs_control_VPA_high_1B	chr18_58511684_58512772	33.7870719522967	2.35997101308609	1.53794328034602e-06	3.15771800560158e-05	Exon (ENST00000610389.1/ENST00000610389.1, exon 1 of 1)	ALPK2
control_d65_vs_control_VPA_high_1B	chr18_58805290_58806277	26.585844752251	1.4995428697413	0.00549417561568158	0.0303181157725581	Promoter (2-3kb)	LINC01926
control_d65_vs_control_VPA_high_1B	chr18_58843119_58844150	52.1851082078247	2.19436668032875	6.57534332210783e-07	1.48126160005527e-05	Distal Intergenic	ZNF532
control_d65_vs_control_VPA_high_1B	chr18_58996165_58997053	20.9687045635237	2.5956648182193	3.14074603543551e-06	5.90433005639312e-05	Promoter (<=1kb)	OACYLP
control_d65_vs_control_VPA_high_1B	chr18_59386804_59388085	58.8361855707345	3.94365695165409	1.68779161219619e-15	1.97102815890371e-13	Distal Intergenic	LMAN1
control_d65_vs_control_VPA_high_1B	chr18_59570059_59571095	48.3645266728978	1.06692971410317	0.00749111819110898	0.038450086176549	Intron (ENST00000439986.9/147372, intron 2 of 10)	CCBE1
control_d65_vs_control_VPA_high_1B	chr18_61413081_61413997	23.2377195795842	2.39512846492403	8.58982997908713e-05	0.00103659316363648	Intron (ENST00000262717.9/28316, intron 1 of 11)	CDH20
control_d65_vs_control_VPA_high_1B	chr18_61469930_61470920	29.8088732502909	2.57828649154615	9.21716262891725e-06	0.000151239155603271	Intron (ENST00000262717.9/28316, intron 1 of 11)	CDH20
control_d65_vs_control_VPA_high_1B	chr18_62682218_62682966	21.5094330802742	1.89925933801301	0.000810390628870371	0.00669582564362917	Distal Intergenic	PHLPP1
control_d65_vs_control_VPA_high_1B	chr18_62751191_62752457	57.3806280703469	1.58963432136661	1.78241624536145e-05	0.00026840727364241	Intron (ENST00000262719.10/23239, intron 1 of 16)	PHLPP1
control_d65_vs_control_VPA_high_1B	chr18_62876999_62878244	25.903929258399	2.07295141849874	4.84890089565467e-05	0.00063680677116093	Intron (ENST00000262719.10/23239, intron 4 of 16)	PHLPP1
control_d65_vs_control_VPA_high_1B	chr18_63307169_63308446	25.2757251247372	1.57341602321089	0.00400936226441615	0.0237940912931159	Intron (ENST00000333681.5/596, intron 2 of 2)	BCL2
control_d65_vs_control_VPA_high_1B	chr18_65737167_65738099	42.7961819955237	1.44036282108112	0.000778299996209154	0.00648094031604347	Distal Intergenic	CDH7
control_d65_vs_control_VPA_high_1B	chr18_66495358_66496353	22.2648656671235	1.72347145946403	0.00180938846530728	0.012753495262186	Distal Intergenic	CDH19
control_d65_vs_control_VPA_high_1B	chr18_66682500_66683397	20.6167758582765	2.29744384446723	0.00056438987170888	0.00498466454147704	Distal Intergenic	CDH19
control_d65_vs_control_VPA_high_1B	chr18_69674363_69675447	20.4868768361305	2.64759594317165	1.29363293940558e-05	0.000203295665698655	Promoter (2-3kb)	DOK6
control_d65_vs_control_VPA_high_1B	chr18_70221204_70222244	39.5918924255165	2.22961780071411	7.04406476853629e-08	2.00514941503446e-06	Distal Intergenic	RTTN
control_d65_vs_control_VPA_high_1B	chr18_74281065_74282001	26.6536496161399	2.09174949592097	0.000366442110362686	0.00349565817736326	Intron (ENST00000340533.9/1528, intron 1 of 4)	CYB5A
control_d65_vs_control_VPA_high_1B	chr18_74819381_74820574	39.9596946789051	1.14866816770709	0.00921606047803331	0.0449784881790055	Intron (ENST00000577538.5/55628, intron 3 of 6)	ZNF407
control_d65_vs_control_VPA_high_1B	chr18_75377810_75379288	21.774474569311	1.42432861571499	0.00430231370023687	0.0251495228106099	Distal Intergenic	SMIM21
control_d65_vs_control_VPA_high_1B	chr18_75638386_75639513	40.6153964601643	2.26794934600546	4.89728681519521e-08	1.44587461116988e-06	Distal Intergenic	LINC01898
control_d65_vs_control_VPA_high_1B	chr18_75654352_75655946	51.5911920704012	2.56015017159654	1.55553239224414e-09	6.31032072169925e-08	Exon (ENST00000657842.1/ENST00000657842.1, exon 4 of 5)	LINC01898
control_d65_vs_control_VPA_high_1B	chr18_75783672_75784885	31.8414859339719	2.23769765983674	0.00021199911664688	0.0022184755739606	Distal Intergenic	LINC01898
control_d65_vs_control_VPA_high_1B	chr18_76262621_76263608	22.8383077855895	1.84152471307625	0.00540396394698209	0.0299338278585943	Distal Intergenic	LINC01893
control_d65_vs_control_VPA_high_1B	chr18_76521462_76522484	28.2459893683268	1.13566000506746	0.00999914513949694	0.0479052509547972	Distal Intergenic	LINC00908
control_d65_vs_control_VPA_high_1B	chr18_77249408_77251011	40.5062901638238	1.45065118844677	0.00373227414151306	0.0224949971505744	Promoter (<=1kb)	GALR1
control_d65_vs_control_VPA_high_1B	chr18_79250047_79250957	33.1260856475374	1.53998392023837	0.000190477079402134	0.00202738234131548	Intron (ENST00000586366.5/374868, intron 9 of 9)	ATP9B
control_d65_vs_control_VPA_high_1B	chr18_79911277_79912172	24.9053465814206	2.14149622469079	0.00055511577910643	0.00491604220798536	Intron (ENST00000357575.8/80148, intron 4 of 4)	SLC66A2
control_d65_vs_control_VPA_high_1B	chr19_1250524_1251228	60.8500320213906	1.50453124064538	0.000163676622564534	0.00178579607037105	Promoter (<=1kb)	MIDN
control_d65_vs_control_VPA_high_1B	chr19_2252958_2254383	46.7529891978914	1.53593942098299	0.00544249341221471	0.0300954033772914	Promoter (2-3kb)	JSRP1
control_d65_vs_control_VPA_high_1B	chr19_2329523_2329934	20.1931777583728	1.89179539800046	0.00878757261499125	0.0434014035604788	Promoter (<=1kb)	SPPL2B
control_d65_vs_control_VPA_high_1B	chr19_4278297_4279936	60.673866231244	1.2575613483412	0.00324311742270575	0.0201572190236866	Promoter (<=1kb)	SHD
control_d65_vs_control_VPA_high_1B	chr19_4374998_4376209	38.3404379179829	1.57988577023225	0.000310430875399747	0.00304693024556563	Intron (ENST00000269886.7/6455, intron 1 of 9)	SH3GL1
control_d65_vs_control_VPA_high_1B	chr19_4738131_4738698	20.49956675878	2.5617464193297	0.000180818796758152	0.00194022520500326	Distal Intergenic	DPP9
control_d65_vs_control_VPA_high_1B	chr19_4742483_4743500	32.7325109654787	2.61661185411279	1.90316499272576e-06	3.8152486790015e-05	Distal Intergenic	DPP9
control_d65_vs_control_VPA_high_1B	chr19_4763828_4764604	23.6165929167028	2.680582354574	0.000370543030147923	0.00352482682228802	Distal Intergenic	MIR7-3HG
control_d65_vs_control_VPA_high_1B	chr19_5093261_5094315	28.6662496369966	1.2749989582643	0.00402536970852409	0.0238658462931756	Intron (ENST00000611640.4/23030, intron 9 of 23)	KDM4B
control_d65_vs_control_VPA_high_1B	chr19_5192531_5193898	79.4108973819822	1.17515709023318	0.00213708048467584	0.0145255698062388	Intron (ENST00000588552.5/5802, intron 29 of 30)	PTPRS
control_d65_vs_control_VPA_high_1B	chr19_5394670_5395418	45.605846141826	2.96379017617148	6.5405741658493e-06	0.000112206307888588	Distal Intergenic	PTPRS
control_d65_vs_control_VPA_high_1B	chr19_5397706_5398278	27.518053496452	2.30843642087469	0.000315497319485963	0.00308693082606503	Distal Intergenic	PTPRS
control_d65_vs_control_VPA_high_1B	chr19_6066196_6067531	49.6286171518677	1.01315836987411	0.00467267810195611	0.0267745381554265	Intron (ENST00000303657.10/5990, intron 1 of 17)	RFX2
control_d65_vs_control_VPA_high_1B	chr19_6216672_6217720	57.0408692821756	1.36863437094113	0.000212785780106476	0.00222596526664072	Promoter (<=1kb)	MLLT1
control_d65_vs_control_VPA_high_1B	chr19_10686435_10687335	22.491494630351	1.67695248822247	0.00228587090339575	0.0153215837096375	Promoter (<=1kb)	ILF3
control_d65_vs_control_VPA_high_1B	chr19_10888267_10889108	29.4759515665028	2.04616707988058	0.000778891233603143	0.00648547896302795	Intron (ENST00000327064.8/10498, intron 1 of 15)	CARM1
control_d65_vs_control_VPA_high_1B	chr19_11373468_11374058	29.6094969006744	2.44650724338718	1.49964546372512e-05	0.00023124096891379	Promoter (<=1kb)	SWSAP1
control_d65_vs_control_VPA_high_1B	chr19_17762180_17763076	58.7641848685942	3.05040622891627	4.59651560201992e-12	3.02707961414028e-10	Promoter (<=1kb)	FCHO1
control_d65_vs_control_VPA_high_1B	chr19_18232450_18233569	42.1236581237907	1.4827755629175	0.000550746426468421	0.00488450848114845	Promoter (<=1kb)	PDE4C
control_d65_vs_control_VPA_high_1B	chr19_21622794_21623445	27.7986885221848	2.97399136811404	4.85753458576198e-06	8.65585134113979e-05	Distal Intergenic	LOC400682
control_d65_vs_control_VPA_high_1B	chr19_28493784_28494928	37.2451127383672	1.52979655448875	0.002479359918796	0.0163269847506709	Intron (ENST00000592347.5/100420587, intron 5 of 9)	LOC100420587
control_d65_vs_control_VPA_high_1B	chr19_29404758_29405868	53.4795098432247	1.85225597156217	3.67104895729768e-06	6.7716195562271e-05	Intron (ENST00000582581.5/284395, intron 3 of 9)	LOC284395
control_d65_vs_control_VPA_high_1B	chr19_29723912_29725071	36.0831054452961	1.20348332439427	0.00660689714531248	0.0349185672180249	Distal Intergenic	C19orf12
control_d65_vs_control_VPA_high_1B	chr19_30263797_30265229	21.9940127926673	1.76004245611262	0.00388845834287368	0.0232323877362055	Intron (ENST00000590564.5/ENST00000590564.5, intron 1 of 3)	ZNF536
control_d65_vs_control_VPA_high_1B	chr19_30275838_30277333	20.8399168467124	4.08363458271752	1.27262137169181e-07	3.40709078647965e-06	Intron (ENST00000590564.5/ENST00000590564.5, intron 1 of 3)	ZNF536
control_d65_vs_control_VPA_high_1B	chr19_30309857_30311286	32.0932186922628	2.02424566246517	0.000102769965166409	0.00120503390836204	Intron (ENST00000585628.5/9745, intron 2 of 5)	ZNF536
control_d65_vs_control_VPA_high_1B	chr19_32537485_32538217	23.8373245429991	2.41525216731903	0.000119332979749347	0.00136873142584081	Distal Intergenic	PDCD5
control_d65_vs_control_VPA_high_1B	chr19_38228102_38228876	33.3550089941996	2.19910049287319	6.46253775125619e-05	0.000813360092532304	Promoter (<=1kb)	DPF1
control_d65_vs_control_VPA_high_1B	chr19_42352179_42353222	58.5342367132488	2.79954780502159	2.48376037559905e-15	2.82754292408164e-13	Promoter (<=1kb)	MEGF8
control_d65_vs_control_VPA_high_1B	chr19_45954067_45954921	54.9913332415289	1.40589009466496	0.00421967772118215	0.0247696076268191	Intron (ENST00000263257.6/4858, intron 2 of 3)	NOVA2
control_d65_vs_control_VPA_high_1B	chr19_48330033_48330782	51.7427480319294	1.20679965489781	0.00231076619407181	0.015448453877639	Promoter (<=1kb)	EMP3
control_d65_vs_control_VPA_high_1B	chr19_48511696_48512535	33.0583883784484	2.17811082274206	3.50484330814478e-07	8.45445902838128e-06	Promoter (<=1kb)	LMTK3
control_d65_vs_control_VPA_high_1B	chr19_49584953_49585464	26.9993138093509	3.55401259913275	1.26551132431848e-07	3.39078790937624e-06	Intron (ENST00000246794.10/5639, intron 4 of 6)	PRRG2
control_d65_vs_control_VPA_high_1B	chr19_53660811_53661643	22.8709693160237	1.57618297127343	0.00972437769962719	0.0468772712236085	Distal Intergenic	MIR512-1
control_d65_vs_control_VPA_high_1B	chr19_55140970_55141896	25.7387821659147	1.59492424234428	0.00332376543838732	0.0205438219360275	Promoter (<=1kb)	TNNT1
control_d65_vs_control_VPA_high_1B	chr19_56293838_56295167	31.1247644950713	1.90450133793326	8.92019228171331e-05	0.00107049825452436	Promoter (<=1kb)	EDDM13
control_d65_vs_control_VPA_high_1B	chr2_1728662_1729279	21.3678175086749	2.2667719541229	0.000151192509662396	0.00167182283287996	Intron (ENST00000252804.9/7837, intron 1 of 22)	PXDN
control_d65_vs_control_VPA_high_1B	chr2_1854555_1855710	41.4417425881239	1.61408612694599	3.22070931598579e-05	0.00044716222266646	Intron (ENST00000647755.1/23040, intron 18 of 24)	MYT1L
control_d65_vs_control_VPA_high_1B	chr2_2331164_2332460	33.9699203548421	2.81292251767661	4.40289753257688e-09	1.64117429231315e-07	Promoter (<=1kb)	MYT1L
control_d65_vs_control_VPA_high_1B	chr2_3076816_3077747	23.3626616834764	2.01042624626441	0.00296424316368156	0.0188086073688533	Intron (ENST00000457478.1/101927554, intron 3 of 6)	LINC01250
control_d65_vs_control_VPA_high_1B	chr2_3256784_3257703	26.9534000455472	2.57282500706674	7.34208599053706e-08	2.08047686406482e-06	Promoter (<=1kb)	EIPR1
control_d65_vs_control_VPA_high_1B	chr2_3265426_3266856	53.0087809442567	1.0960252233428	0.00220023378058717	0.0148582856110306	Intron (ENST00000478754.5/7260, intron 3 of 10)	EIPR1
control_d65_vs_control_VPA_high_1B	chr2_3605039_3606027	25.1280790792135	1.77888086097501	0.00246941072515305	0.0162745972072377	Promoter (<=1kb)	COLEC11
control_d65_vs_control_VPA_high_1B	chr2_5839406_5840224	40.7350231945394	1.4915419013088	0.00127442846581856	0.00964401233523387	Distal Intergenic	LINC01810
control_d65_vs_control_VPA_high_1B	chr2_5945688_5946955	87.2885669518958	2.52176281807779	5.9026251445643e-08	1.70927471247576e-06	Exon (ENST00000670048.1/150622, exon 2 of 4)	LOC400940
control_d65_vs_control_VPA_high_1B	chr2_5981262_5982119	39.1035197731153	1.3520950754164	0.000907191741448164	0.00732967393064183	Promoter (<=1kb)	LOC400940
control_d65_vs_control_VPA_high_1B	chr2_5985460_5986216	31.3936449918094	3.06160137349974	7.82207663238871e-05	0.000956508212710194	Promoter (2-3kb)	LOC400940
control_d65_vs_control_VPA_high_1B	chr2_6053712_6054887	22.2700433655894	2.69348588978032	9.47429286796225e-06	0.00015499896479744	Distal Intergenic	LOC400940
control_d65_vs_control_VPA_high_1B	chr2_6069131_6070001	41.5813860773236	1.22251508620717	0.00917092504271565	0.0448129038034413	Distal Intergenic	LOC400940
control_d65_vs_control_VPA_high_1B	chr2_6080843_6082004	35.4441392593919	2.40711057620524	2.05694586501585e-06	4.09552467446513e-05	Distal Intergenic	LOC400940
control_d65_vs_control_VPA_high_1B	chr2_6325396_6326156	21.2810162744064	2.0664617051641	0.000339639471653632	0.00327936501580282	Exon (ENST00000425125.1/ENST00000425125.1, exon 1 of 3)	LINC01247
control_d65_vs_control_VPA_high_1B	chr2_6448894_6450284	53.9173753094397	4.16622866081576	1.54972245747867e-07	4.06541614697384e-06	Distal Intergenic	LINC01247
control_d65_vs_control_VPA_high_1B	chr2_6639800_6641095	50.447188432923	2.59031199367986	2.9511809639582e-08	9.1808071229902e-07	Promoter (<=1kb)	LINC01246
control_d65_vs_control_VPA_high_1B	chr2_8157687_8158348	22.7393915322486	4.36142922885508	3.59618873207858e-06	6.65261543230268e-05	Intron (ENST00000663636.1/339788, intron 1 of 5)	LINC00299
control_d65_vs_control_VPA_high_1B	chr2_8193492_8194281	38.2095819412365	2.39039161569184	2.26847798442335e-05	0.000331072561888027	Intron (ENST00000663636.1/339788, intron 1 of 5)	LINC00299
control_d65_vs_control_VPA_high_1B	chr2_9508566_9510127	23.3402298091985	1.71772573767407	0.0011837170797701	0.00907643914854412	3' UTR	ADAM17
control_d65_vs_control_VPA_high_1B	chr2_10162661_10163538	52.9013396128897	2.02166924279853	6.10788766647437e-06	0.000105711319218701	Intron (ENST00000641498.1/6241, intron 11 of 11)	NA
control_d65_vs_control_VPA_high_1B	chr2_10204262_10205478	29.4602527060766	1.81473728601925	0.000389506253630785	0.00367157715321933	Intron (ENST00000381786.7/348738, intron 3 of 3)	MIR4261
control_d65_vs_control_VPA_high_1B	chr2_10375689_10376329	20.3357515265031	2.43500390853999	0.00020868678432214	0.0021900961151609	Intron (ENST00000423674.5/3241, intron 1 of 3)	HPCAL1
control_d65_vs_control_VPA_high_1B	chr2_10425678_10427911	45.3139167344914	1.08717137062086	0.00270662065057817	0.0174986703058363	3' UTR	HPCAL1
control_d65_vs_control_VPA_high_1B	chr2_10579196_10580483	20.2096586779235	1.74378765657926	0.00309964773061652	0.019467010381131	Intron (ENST00000381685.10/79954, intron 19 of 20)	NOL10
control_d65_vs_control_VPA_high_1B	chr2_11348964_11349781	24.8228241160333	3.50991802120102	1.77619427194204e-09	7.1099844043084e-08	Promoter (<=1kb)	ROCK2
control_d65_vs_control_VPA_high_1B	chr2_11473326_11474398	35.6705686846452	1.77674359489214	0.000502741369582627	0.00453522857547372	Distal Intergenic	E2F6
control_d65_vs_control_VPA_high_1B	chr2_11495725_11496670	59.482487335343	1.91134337126622	0.000422991175369502	0.0039325435521504	Intron (ENST00000628795.2/9687, intron 1 of 2)	GREB1
control_d65_vs_control_VPA_high_1B	chr2_11499011_11499647	41.6780353937363	2.55639873084809	0.000383857996237748	0.00362708233957482	Intron (ENST00000628795.2/9687, intron 1 of 2)	GREB1
control_d65_vs_control_VPA_high_1B	chr2_12082831_12083966	39.6247610286288	3.84213827601672	2.29360209936107e-09	9.00394651632988e-08	Exon (ENST00000450916.1/100506457, exon 3 of 3)	MIR3681HG
control_d65_vs_control_VPA_high_1B	chr2_12417347_12418358	36.0836620039315	1.79623206477486	6.16600019695465e-05	0.000781515434424035	Intron (ENST00000412294.5/100506457, intron 4 of 5)	MIR3681HG
control_d65_vs_control_VPA_high_1B	chr2_14492740_14493448	21.2491119953571	2.38295985715334	6.128049047025e-05	0.000777248880402268	Distal Intergenic	LINC00276
control_d65_vs_control_VPA_high_1B	chr2_15438081_15438980	20.5358299252558	1.86135402327377	0.00209149025007438	0.0142828342773912	Intron (ENST00000281513.10/51594, intron 21 of 51)	NBAS
control_d65_vs_control_VPA_high_1B	chr2_15560339_15562696	99.3000542851344	1.06467253247984	0.000145859378474944	0.00162411236449009	Promoter (<=1kb)	NBAS
control_d65_vs_control_VPA_high_1B	chr2_15983756_15984899	41.7900662944111	1.86736381005429	7.26446711569901e-07	1.62147851488762e-05	Distal Intergenic	GACAT3
control_d65_vs_control_VPA_high_1B	chr2_16012584_16013938	40.1041881131629	1.82474468336634	0.000110175463219962	0.00127900290537191	Promoter (<=1kb)	GACAT3
control_d65_vs_control_VPA_high_1B	chr2_16138406_16139655	44.776745286059	2.86057415360446	1.57039663642395e-07	4.11045546066923e-06	Distal Intergenic	GACAT3
control_d65_vs_control_VPA_high_1B	chr2_16166305_16167190	66.7577030835834	2.36429077113983	1.71811434651536e-08	5.66863989606839e-07	Distal Intergenic	GACAT3
control_d65_vs_control_VPA_high_1B	chr2_16168430_16169357	34.5418601839213	3.2979785934117	1.3198713338956e-06	2.7608716781401e-05	Distal Intergenic	GACAT3
control_d65_vs_control_VPA_high_1B	chr2_16632546_16633146	21.6117426163656	2.81158732176174	2.69392845712241e-05	0.000383780363191255	Intron (ENST00000381323.7/81553, intron 1 of 11)	FAM49A
control_d65_vs_control_VPA_high_1B	chr2_18988504_18989284	39.4350571046896	1.29410457354398	0.00664378997600983	0.0350661377467673	Intron (ENST00000424895.1/400945, intron 3 of 3)	LINC01376
control_d65_vs_control_VPA_high_1B	chr2_20353258_20354076	29.0298617490478	2.17757378977129	2.94983501059953e-05	0.000414052816520894	Promoter (1-2kb)	PUM2
control_d65_vs_control_VPA_high_1B	chr2_20381419_20382141	30.006683386476	1.68300060305435	0.000271918220663637	0.00272898402136704	Distal Intergenic	PUM2
control_d65_vs_control_VPA_high_1B	chr2_20487389_20488587	58.1120688255372	1.58231463057686	1.41701039250406e-05	0.000220013516398562	Distal Intergenic	LOC107985856
control_d65_vs_control_VPA_high_1B	chr2_20549370_20550267	26.5288370533101	3.36064024487698	1.37099492043335e-09	5.63277727552981e-08	Distal Intergenic	HS1BP3-IT1
control_d65_vs_control_VPA_high_1B	chr2_20599850_20600639	47.7995504086346	2.16163985586713	2.81432452602588e-06	5.36711314421846e-05	Intron (ENST00000446825.1/64342, intron 5 of 5)	HS1BP3-IT1
control_d65_vs_control_VPA_high_1B	chr2_23595701_23596700	30.4981650733872	1.22819962261895	0.00523970961542556	0.0292311071837412	Intron (ENST00000486442.6/114818, intron 3 of 13)	KLHL29
control_d65_vs_control_VPA_high_1B	chr2_24411547_24412476	23.7891383663248	1.99834947603766	0.00427961939366319	0.0250473946621172	Exon (ENST00000666971.1/ENST00000666971.1, exon 4 of 4)	ITSN2
control_d65_vs_control_VPA_high_1B	chr2_24459237_24460097	26.1556294811481	2.59050898827733	8.72140474040342e-07	1.91073431078191e-05	Distal Intergenic	NCOA1
control_d65_vs_control_VPA_high_1B	chr2_26912172_26913066	51.141119156313	1.19866416614186	0.00118912651573962	0.0091084578062106	Intron (ENST00000450961.5/56896, intron 2 of 3)	DPYSL5
control_d65_vs_control_VPA_high_1B	chr2_27081024_27081617	45.8728474351298	1.6173581221465	2.91042113762858e-05	0.000409183166726643	Promoter (1-2kb)	EMILIN1
control_d65_vs_control_VPA_high_1B	chr2_28643341_28644431	34.8559753415008	1.96182758503772	5.75534159002538e-06	0.000100446885362038	3' UTR	PLB1
control_d65_vs_control_VPA_high_1B	chr2_28691536_28692324	34.4636439834803	1.24046233633737	0.00614177914158301	0.0329992750999409	Distal Intergenic	LOC100505774
control_d65_vs_control_VPA_high_1B	chr2_30679534_30680191	23.0432142702757	2.98037100347674	9.63841007707189e-08	2.66192642729838e-06	Exon (ENST00000623248.1/ENST00000623248.1, exon 1 of 1)	CAPN13
control_d65_vs_control_VPA_high_1B	chr2_31129074_31130574	20.752842637437	1.81227978876186	0.00184416248722419	0.0129423135074175	Promoter (<=1kb)	GALNT14
control_d65_vs_control_VPA_high_1B	chr2_32882615_32883803	25.6363741397134	2.06268684104799	0.00049329411797639	0.00446575030491552	Promoter (<=1kb)	LINC00486
control_d65_vs_control_VPA_high_1B	chr2_32926646_32927315	25.9875910179087	1.77549955088133	0.00470543072901651	0.0269194660383563	Promoter (<=1kb)	LINC00486
control_d65_vs_control_VPA_high_1B	chr2_33764332_33765721	29.115882000235	3.06721362133604	1.21628091683934e-07	3.27207470510467e-06	Intron (ENST00000366209.6/104355287, intron 1 of 5)	MYADML
control_d65_vs_control_VPA_high_1B	chr2_33912865_33913787	23.6160563435599	4.27172156276809	1.48946989303904e-09	6.06825802774905e-08	Intron (ENST00000366209.6/104355287, intron 2 of 5)	LINC01317
control_d65_vs_control_VPA_high_1B	chr2_34242056_34243135	35.9370611425209	1.32511742218295	0.00365541211413495	0.0221345579813598	Intron (ENST00000366209.6/104355287, intron 4 of 5)	LINC01320
control_d65_vs_control_VPA_high_1B	chr2_34729586_34730319	21.6408546441804	2.0142105326376	0.00164307422254909	0.0118183586041805	Intron (ENST00000658168.1/104355288, intron 2 of 3)	LINC01320
control_d65_vs_control_VPA_high_1B	chr2_35468100_35468924	52.4382650745517	1.85913853161817	2.04539893776831e-05	0.000302501740966215	Promoter (2-3kb)	MIR548AD
control_d65_vs_control_VPA_high_1B	chr2_37205025_37206581	31.5432073299268	2.74073588929129	0.000456136161259221	0.00418872854258249	Intron (ENST00000397064.6/100505876, intron 4 of 4)	CEBPZ
control_d65_vs_control_VPA_high_1B	chr2_37344386_37345357	23.3902217296917	2.14438756047499	0.000117726877195098	0.00135351481412034	Promoter (<=1kb)	QPCT
control_d65_vs_control_VPA_high_1B	chr2_37773283_37774686	28.8533875068105	1.81919711600267	4.01639558260921e-05	0.000541687900436899	Distal Intergenic	CDC42EP3
control_d65_vs_control_VPA_high_1B	chr2_39364463_39365567	25.992501342099	2.00325870876819	0.00445916373224787	0.0258390923018628	Intron (ENST00000263881.8/8491, intron 2 of 33)	MAP4K3
control_d65_vs_control_VPA_high_1B	chr2_40466370_40467926	24.4814774919473	1.91137929389225	0.000480057939854847	0.00436875736490776	Intron (ENST00000403092.5/6546, intron 1 of 10)	SLC8A1
control_d65_vs_control_VPA_high_1B	chr2_42545446_42546493	27.5805617459562	2.05067215065726	0.00834404281370621	0.041732984387713	Intron (ENST00000405592.5/57504, intron 2 of 17)	MTA3
control_d65_vs_control_VPA_high_1B	chr2_44135064_44135973	23.0091820838909	2.02091417441901	0.00741962602377295	0.038173528641419	Distal Intergenic	PPM1B
control_d65_vs_control_VPA_high_1B	chr2_44267478_44268760	53.2627441288801	1.43231070215785	9.38190560020249e-05	0.00111583160538033	Intron (ENST00000649044.1/6519, intron 5 of 14)	SLC3A1
control_d65_vs_control_VPA_high_1B	chr2_44705378_44707600	170.897393723633	3.21138553710089	2.46021650314205e-24	1.10707521226943e-21	Promoter (1-2kb)	CAMKMT
control_d65_vs_control_VPA_high_1B	chr2_46554410_46556408	26.1216944212329	1.51410671365729	0.00988239246904292	0.0474713947115311	Intron (ENST00000465198.1/23433, intron 1 of 1)	RHOQ
control_d65_vs_control_VPA_high_1B	chr2_47178191_47178810	40.2531164441352	2.22375084639736	9.77974522369497e-05	0.00115611284549766	Promoter (1-2kb)	CALM2
control_d65_vs_control_VPA_high_1B	chr2_47227530_47228283	29.1677483615742	2.21299007996277	7.80966602552669e-05	0.000955342221112324	Intron (ENST00000654272.1/ENST00000654272.1, intron 1 of 1)	CALM2
control_d65_vs_control_VPA_high_1B	chr2_47309385_47311597	47.4085943906521	1.05399863851531	0.00299529357765755	0.0189601126413481	Promoter (<=1kb)	EPCAM-DT
control_d65_vs_control_VPA_high_1B	chr2_47344502_47345797	84.6451641221982	1.56664090041247	1.36537049162541e-06	2.84499995843586e-05	Promoter (<=1kb)	EPCAM-DT
control_d65_vs_control_VPA_high_1B	chr2_48279246_48280002	20.0474437289267	1.95293346755456	0.00130396093095561	0.00982254584424014	Intron (ENST00000651429.1/ENST00000651429.1, intron 2 of 8)	FOXN2
control_d65_vs_control_VPA_high_1B	chr2_48397119_48399029	112.076248993962	3.0769772363759	7.04658322784568e-27	4.54598116549555e-24	Distal Intergenic	PPP1R21
control_d65_vs_control_VPA_high_1B	chr2_48414640_48415918	27.2503991208102	2.51103581580896	1.49736595605113e-06	3.08363496201256e-05	Distal Intergenic	PPP1R21
control_d65_vs_control_VPA_high_1B	chr2_48585498_48586327	26.8280723142255	2.82848671933493	3.05572170508399e-05	0.000427260923771953	Intron (ENST00000649748.1/11037, intron 3 of 4)	STON1
control_d65_vs_control_VPA_high_1B	chr2_48587392_48588167	20.1863372487674	1.78191388519315	0.00300222996386954	0.0189940186733167	Intron (ENST00000649748.1/11037, intron 3 of 4)	STON1
control_d65_vs_control_VPA_high_1B	chr2_49973789_49974483	34.1727420207167	1.74559161263061	8.32347973294067e-05	0.00100878671622251	Promoter (<=1kb)	NRXN1
control_d65_vs_control_VPA_high_1B	chr2_50691289_50692202	21.8644761245514	2.70749777885132	1.26499912681276e-05	0.000199440458663094	Intron (ENST00000401669.7/9378, intron 5 of 22)	MIR8485
control_d65_vs_control_VPA_high_1B	chr2_51000728_51001375	23.5443952224937	3.72344987734829	9.2551069458145e-05	0.00110309715731782	Intron (ENST00000401669.7/9378, intron 2 of 22)	NRXN1
control_d65_vs_control_VPA_high_1B	chr2_51031722_51033072	83.6569990052264	2.17994797581204	1.03841600655546e-11	6.43269351282801e-10	Promoter (<=1kb)	LOC730100
control_d65_vs_control_VPA_high_1B	chr2_54947132_54948500	30.5015719879333	1.22671928400551	0.00386510671287732	0.0231289155220257	Promoter (<=1kb)	EML6
control_d65_vs_control_VPA_high_1B	chr2_55133565_55134574	48.3367009471839	1.34776130278724	0.000605898682479944	0.00527738361330217	Distal Intergenic	RTN4
control_d65_vs_control_VPA_high_1B	chr2_55138290_55139245	32.7677921388851	3.17603840987907	1.59760530747437e-09	6.46389745532346e-08	Distal Intergenic	RTN4
control_d65_vs_control_VPA_high_1B	chr2_56008738_56009633	46.0589963045309	1.66764677443435	0.000329022084409779	0.00319479963169761	Intron (ENST00000606639.1/ENST00000606639.1, intron 1 of 6)	MIR216B
control_d65_vs_control_VPA_high_1B	chr2_56013895_56014572	33.1563640578675	2.76932073783278	5.11843505422214e-05	0.000666409479667537	Intron (ENST00000606639.1/ENST00000606639.1, intron 1 of 6)	MIR216B
control_d65_vs_control_VPA_high_1B	chr2_56127289_56128382	22.706255116614	2.47499641294898	1.70160086929852e-06	3.45073577712292e-05	Intron (ENST00000606639.1/ENST00000606639.1, intron 2 of 6)	CCDC85A
control_d65_vs_control_VPA_high_1B	chr2_57877877_57879281	25.9348506599253	3.35374196774963	4.94056046051004e-09	1.81947342612384e-07	Distal Intergenic	VRK2
control_d65_vs_control_VPA_high_1B	chr2_58539741_58541167	37.0408765154886	2.92772637438748	2.53142390995371e-08	8.01507672734487e-07	Intron (ENST00000422723.5/400955, intron 2 of 5)	LINC01122
control_d65_vs_control_VPA_high_1B	chr2_58912934_58913700	42.5722870989827	3.15563504490683	1.8301883767965e-08	6.00165705150312e-07	Intron (ENST00000422723.5/400955, intron 4 of 5)	LINC01122
control_d65_vs_control_VPA_high_1B	chr2_58992070_58992896	21.321784327405	1.65442574330118	0.00187538225027662	0.0131023709411434	Intron (ENST00000452840.5/400955, intron 6 of 11)	LINC01122
control_d65_vs_control_VPA_high_1B	chr2_60316094_60317065	35.1602720035311	2.28162495713784	1.53894129334343e-06	3.15911637383214e-05	Distal Intergenic	MIR4432HG
control_d65_vs_control_VPA_high_1B	chr2_63013213_63014332	37.5368616817775	2.73508544644658	9.78277804437564e-07	2.11261799592039e-05	Exon (ENST00000650490.1/100132215, exon 4 of 5)	EHBP1
control_d65_vs_control_VPA_high_1B	chr2_63034462_63036077	29.3704904095476	2.48095353629603	3.59228462985117e-07	8.6507317204918e-06	Intron (ENST00000405015.7/23301, intron 19 of 22)	EHBP1
control_d65_vs_control_VPA_high_1B	chr2_63849450_63850228	24.4867891794643	2.26076020461845	0.00558075872490607	0.0306863223030597	Intron (ENST00000394417.6/7360, intron 1 of 9)	UGP2
control_d65_vs_control_VPA_high_1B	chr2_64864423_64865965	84.1377644010669	1.10376088101585	0.000172964672664791	0.00187034530171063	Promoter (<=1kb)	LINC01800
control_d65_vs_control_VPA_high_1B	chr2_64875930_64876772	30.0930961478316	2.40319410515657	3.56645456055696e-06	6.60312483355426e-05	Distal Intergenic	LINC01800
control_d65_vs_control_VPA_high_1B	chr2_66507424_66509014	53.5981202701734	1.17083227367049	0.00489362267428777	0.0277381815129395	Promoter (<=1kb)	MEIS1
control_d65_vs_control_VPA_high_1B	chr2_66536815_66537524	25.5986955314819	1.98135192100047	0.000244673814379214	0.00249781052907455	Intron (ENST00000272369.14/4211, intron 8 of 12)	MEIS1
control_d65_vs_control_VPA_high_1B	chr2_66541580_66542193	22.3771362495861	3.09894929545777	1.01922289340551e-06	2.19036229957757e-05	Intron (ENST00000272369.14/4211, intron 8 of 12)	LINC01798
control_d65_vs_control_VPA_high_1B	chr2_66699689_66700745	24.2899262958933	2.12162451225615	0.000324313651272076	0.00315800259508027	Promoter (2-3kb)	LINC01797
control_d65_vs_control_VPA_high_1B	chr2_70726062_70726804	21.5791919014319	2.45817105714773	0.00661548811339893	0.0349493245267667	Intron (ENST00000403045.6/119, intron 1 of 20)	ADD2
control_d65_vs_control_VPA_high_1B	chr2_70732768_70734339	29.9975575376813	2.26062532944564	1.13318351205698e-05	0.000181529733521786	Intron (ENST00000403045.6/119, intron 1 of 20)	ADD2
control_d65_vs_control_VPA_high_1B	chr2_70745421_70747009	24.9859706597275	2.88177620563589	2.90135225650246e-06	5.51356498498322e-05	Intron (ENST00000403045.6/119, intron 1 of 20)	ADD2
control_d65_vs_control_VPA_high_1B	chr2_70766904_70768660	75.4545998942805	1.46163617191248	1.40006919667915e-05	0.00021773926827992	Promoter (<=1kb)	ADD2
control_d65_vs_control_VPA_high_1B	chr2_71001833_71002798	41.4758058123357	2.41325888814348	7.92681736913676e-07	1.75288348930836e-05	Exon (ENST00000416229.1/ENST00000416229.1, exon 2 of 2)	TEX261
control_d65_vs_control_VPA_high_1B	chr2_72954886_72955770	31.0242246197189	1.78567278750979	0.000885776766900427	0.00719162853315409	Intron (ENST00000474528.5/94097, intron 13 of 13)	SFXN5
control_d65_vs_control_VPA_high_1B	chr2_74515497_74516735	33.9164036933484	2.42531386833434	2.26614841470814e-05	0.000330756788606244	Promoter (1-2kb)	TLX2
control_d65_vs_control_VPA_high_1B	chr2_74778079_74779247	56.6053890943102	2.2544003839193	3.34339252084729e-09	1.27363257301896e-07	Exon (ENST00000660620.1/ENST00000660620.1, exon 1 of 3)	HK2
control_d65_vs_control_VPA_high_1B	chr2_75453376_75454401	21.6936912711911	3.41986630628343	2.97326145048853e-07	7.2912753980697e-06	Distal Intergenic	EVA1A
control_d65_vs_control_VPA_high_1B	chr2_77007445_77008277	32.5587623771323	4.96362407456229	3.97772992070408e-08	1.19870680086572e-06	Intron (ENST00000445178.1/101927907, intron 3 of 3)	LRRTM4-AS1
control_d65_vs_control_VPA_high_1B	chr2_77008802_77009699	23.7963736105304	3.13381855332173	1.49832636913969e-08	5.00142947726927e-07	Exon (ENST00000445178.1/101927907, exon 4 of 4)	LRRTM4-AS1
control_d65_vs_control_VPA_high_1B	chr2_77018047_77018738	20.9631085850635	2.1842729536679	0.00383909930791838	0.0230098944869602	Intron (ENST00000409911.5/80059, intron 2 of 2)	LRRTM4-AS1
control_d65_vs_control_VPA_high_1B	chr2_77052541_77053270	22.2611671641295	2.95437291840235	5.12171651426888e-05	0.000666695975073818	Intron (ENST00000409911.5/80059, intron 2 of 2)	LRRTM4-AS1
control_d65_vs_control_VPA_high_1B	chr2_77629452_77630142	28.3748015267509	4.30104113003657	2.10678697140454e-07	5.35346788529777e-06	Distal Intergenic	LRRTM4
control_d65_vs_control_VPA_high_1B	chr2_78263323_78264105	22.7323107493657	4.26274543183365	5.65430014541888e-07	1.29678108236156e-05	Intron (ENST00000667782.1/101927967, intron 1 of 6)	LOC101927967
control_d65_vs_control_VPA_high_1B	chr2_78304547_78305232	22.9850786477651	3.09912622840569	1.00385518994096e-05	0.000163172306501934	Distal Intergenic	LOC101927967
control_d65_vs_control_VPA_high_1B	chr2_79437377_79438367	72.5836287747581	1.88782192462713	2.96597780120896e-07	7.27544571907353e-06	Intron (ENST00000466387.5/1496, intron 4 of 21)	CTNNA2-AS1
control_d65_vs_control_VPA_high_1B	chr2_79512249_79513476	128.076802540146	1.73197770751247	6.53711391658694e-10	2.88306971419456e-08	Promoter (<=1kb)	CTNNA2
control_d65_vs_control_VPA_high_1B	chr2_79832326_79833547	28.7016466898546	3.02023863332142	1.14229371382359e-06	2.42504454393907e-05	Intron (ENST00000466387.5/1496, intron 7 of 21)	MIR8080
control_d65_vs_control_VPA_high_1B	chr2_80280739_80281716	21.2378425824975	1.71223415044887	0.00529554678721048	0.029479436542145	Intron (ENST00000466387.5/1496, intron 11 of 21)	LRRTM1
control_d65_vs_control_VPA_high_1B	chr2_80302574_80304915	93.0550613004516	1.23014109715213	4.66006857998947e-06	8.34350665660661e-05	Promoter (<=1kb)	LRRTM1
control_d65_vs_control_VPA_high_1B	chr2_83531064_83531837	31.960098698278	3.14347179592475	6.60903372786557e-07	1.48784239132139e-05	Distal Intergenic	LINC01809
control_d65_vs_control_VPA_high_1B	chr2_83584409_83585495	56.0523116144977	3.98029884483102	1.07511976181957e-10	5.5365751495656e-09	Distal Intergenic	LINC01809
control_d65_vs_control_VPA_high_1B	chr2_84386322_84387214	27.0769216250697	2.91452228699956	1.87107848443042e-06	3.75734876153184e-05	Distal Intergenic	SUCLG1
control_d65_vs_control_VPA_high_1B	chr2_84440765_84441950	26.3658569986694	2.77109096829383	9.94293668726644e-06	0.000161763213650519	Promoter (<=1kb)	SUCLG1
control_d65_vs_control_VPA_high_1B	chr2_84906950_84907725	27.7953487737294	1.34307214886319	0.00891705145370433	0.0438854101738092	Promoter (<=1kb)	TRABD2A
control_d65_vs_control_VPA_high_1B	chr2_85189188_85190182	72.0283319235073	1.61073440550437	1.94586145969978e-05	0.000289590832074371	Promoter (2-3kb)	TCF7L1-IT1
control_d65_vs_control_VPA_high_1B	chr2_85234711_85235599	44.31493254466	1.41437422240094	0.00133535598314122	0.0100104495267475	Intron (ENST00000282111.4/83439, intron 3 of 11)	LOC102724579
control_d65_vs_control_VPA_high_1B	chr2_85388641_85389415	21.8783026823468	2.59815326917806	0.000304264500466015	0.002995425401609	Promoter (<=1kb)	ELMOD3
control_d65_vs_control_VPA_high_1B	chr2_86360464_86361253	24.3229711366225	2.37421276220638	4.13268589884293e-06	7.51330965062237e-05	Distal Intergenic	REEP1
control_d65_vs_control_VPA_high_1B	chr2_86703642_86705006	26.0371950023608	1.5547281022311	0.000363830559548503	0.00347440319634759	Intron (ENST00000604011.5/100526767, intron 1 of 7)	RMND5A
control_d65_vs_control_VPA_high_1B	chr2_88398048_88398827	30.0028069037631	4.45994250236288	1.71898873833366e-09	6.90317342932841e-08	Distal Intergenic	FOXI3
control_d65_vs_control_VPA_high_1B	chr2_88599980_88600600	44.6173347618527	2.29369015195917	1.58287383560334e-09	6.40949761592898e-08	Intron (ENST00000652736.1/9451, intron 2 of 16)	EIF2AK3
control_d65_vs_control_VPA_high_1B	chr2_94996218_94997043	21.9666152929155	1.50938529555932	0.00443372367886569	0.0257290719750571	Distal Intergenic	MAL
control_d65_vs_control_VPA_high_1B	chr2_98177124_98178328	25.0826175612727	1.7777234020926	0.00292901823622921	0.0186319506452023	Intron (ENST00000432242.5/200403, intron 8 of 28)	VWA3B
control_d65_vs_control_VPA_high_1B	chr2_98241583_98242780	57.6342991684262	3.10908364119683	8.31666487433597e-11	4.36950570309212e-09	Promoter (2-3kb)	VWA3B
control_d65_vs_control_VPA_high_1B	chr2_98334161_98335214	40.3852791571432	2.56998932878121	1.18294385170258e-09	4.93027650139041e-08	Exon (ENST00000467398.2/ENST00000467398.2, exon 1 of 3)	CNGA3
control_d65_vs_control_VPA_high_1B	chr2_98346142_98348713	62.007466746759	1.15327040558445	0.00132640356535648	0.00995794242230829	Promoter (<=1kb)	CNGA3
control_d65_vs_control_VPA_high_1B	chr2_99986729_99987517	33.6172823591206	2.14512806145862	0.00239978361819589	0.0159107082566561	Intron (ENST00000409236.6/3899, intron 5 of 22)	AFF3
control_d65_vs_control_VPA_high_1B	chr2_100320852_100322771	66.10595498606	1.07876656675006	0.000501058420023673	0.00452168364862106	Promoter (<=1kb)	LONRF2
control_d65_vs_control_VPA_high_1B	chr2_100412395_100413446	37.5378187814348	2.17840685862367	2.37118187271177e-06	4.61787438059399e-05	Promoter (2-3kb)	CHST10
control_d65_vs_control_VPA_high_1B	chr2_100639556_100640969	32.9297889128642	1.81136651349032	0.000126097343934409	0.00143418731807775	Distal Intergenic	LINC01849
control_d65_vs_control_VPA_high_1B	chr2_101533560_101534552	29.9884426149894	2.48120017137342	1.32621120163724e-06	2.77244693405948e-05	Distal Intergenic	RFX8
control_d65_vs_control_VPA_high_1B	chr2_101710135_101711145	21.5360317922763	1.85747535522018	0.000171187476711413	0.00185404426450686	Intron (ENST00000427603.5/9448, intron 3 of 4)	MAP4K4
control_d65_vs_control_VPA_high_1B	chr2_101781022_101782477	23.2324664861882	1.20935341991412	0.00938280985722899	0.0456046538673319	Intron (ENST00000427603.5/9448, intron 3 of 4)	MAP4K4
control_d65_vs_control_VPA_high_1B	chr2_101983218_101984236	22.1876284195469	1.40257338952887	0.00762711356337993	0.0389945007926325	Promoter (<=1kb)	LINC01127
control_d65_vs_control_VPA_high_1B	chr2_102676472_102677736	22.5902660162551	2.27961176456481	1.0255332761811e-05	0.000166027067991899	Intron (ENST00000233969.3/6549, intron 3 of 11)	SLC9A2
control_d65_vs_control_VPA_high_1B	chr2_104378675_104379568	30.4436224632852	1.56382131390293	0.000146315962738584	0.00162837773046481	Distal Intergenic	LINC01831
control_d65_vs_control_VPA_high_1B	chr2_104408022_104408941	31.8695966264914	2.75240905136207	2.2657693667776e-08	7.27096040228022e-07	Exon (ENST00000658233.1/ENST00000658233.1, exon 2 of 4)	LINC01831
control_d65_vs_control_VPA_high_1B	chr2_104416332_104417822	34.8604670947783	3.23550783614761	1.03658749143367e-10	5.354743976868e-09	Promoter (2-3kb)	LINC01831
control_d65_vs_control_VPA_high_1B	chr2_104430000_104431006	59.3885463001247	3.35622291586546	1.32227192463845e-10	6.70711498954137e-09	Promoter (<=1kb)	LINC01102
control_d65_vs_control_VPA_high_1B	chr2_104702014_104702978	59.9459325880313	2.99569234921672	3.690054097654e-13	2.96851301110143e-11	Exon (ENST00000667846.1/ENST00000667846.1, exon 1 of 3)	LINC01114
control_d65_vs_control_VPA_high_1B	chr2_104788879_104789600	25.8772582399879	2.26806144249808	0.000172327157377772	0.00186415940496144	Distal Intergenic	PANTR1
control_d65_vs_control_VPA_high_1B	chr2_104849760_104850227	20.8259577289162	2.82580160582627	2.46727881309206e-06	4.78073641402264e-05	Promoter (1-2kb)	PANTR1
control_d65_vs_control_VPA_high_1B	chr2_104861865_104863049	51.108479057376	1.5978688987168	0.000146593439581301	0.00163082849527172	Intron (ENST00000598623.1/ENST00000598623.1, intron 2 of 2)	POU3F3
control_d65_vs_control_VPA_high_1B	chr2_105166540_105167328	23.4106368196485	1.86691751056307	0.00215318413671818	0.0146073411820925	Distal Intergenic	LINC01918
control_d65_vs_control_VPA_high_1B	chr2_105882112_105883483	24.4999369354331	3.24075725802193	1.09512571663592e-05	0.00017597044261527	Intron (ENST00000233154.9/8440, intron 4 of 4)	NCK2
control_d65_vs_control_VPA_high_1B	chr2_106851037_106852579	52.7212318618408	1.43924916292687	0.00241869877695201	0.0160127570013257	Intron (ENST00000361686.8/84620, intron 1 of 5)	ST6GAL2
control_d65_vs_control_VPA_high_1B	chr2_107502218_107504581	27.4070214549188	2.5354516726489	0.000124280374464373	0.00141610720365676	Intron (ENST00000414300.2/ENST00000414300.2, intron 2 of 5)	LINC01886
control_d65_vs_control_VPA_high_1B	chr2_108934762_108935934	37.2817542514605	2.74481803455119	1.47941395542012e-10	7.40993101399950e-09	Intron (ENST00000258443.7/10913, intron 1 of 11)	EDAR
control_d65_vs_control_VPA_high_1B	chr2_109386066_109386818	30.073671589794	1.6509049441205	0.00412305582128362	0.0243285189956667	Intron (ENST00000309415.8/344558, intron 3 of 9)	MIR4266
control_d65_vs_control_VPA_high_1B	chr2_109387842_109388637	22.6300374350517	2.44328729281833	0.000215193750954556	0.00224691040633705	Intron (ENST00000309415.8/344558, intron 3 of 9)	MIR4266
control_d65_vs_control_VPA_high_1B	chr2_110770275_110771534	41.1298060183894	1.64788786495232	3.04616696383961e-05	0.000426044481564282	Intron (ENST00000389811.8/55289, intron 2 of 18)	ACOXL
control_d65_vs_control_VPA_high_1B	chr2_110861327_110862321	40.3167051033713	1.32797316170064	0.00992053284777841	0.0476052799834682	Intron (ENST00000389811.8/55289, intron 10 of 18)	ACOXL
control_d65_vs_control_VPA_high_1B	chr2_111534671_111536002	31.3768005267696	1.3222009282015	0.00295227083904485	0.0187465559817227	Intron (ENST00000630717.1/ENST00000630717.1, intron 1 of 1)	MIR4435-2HG
control_d65_vs_control_VPA_high_1B	chr2_111954606_111955529	21.1002477384357	2.07169532074809	0.0059794123874508	0.0323465927215405	Intron (ENST00000295408.9/10461, intron 4 of 18)	MERTK
control_d65_vs_control_VPA_high_1B	chr2_111986047_111987016	36.5433728363986	2.26948263030321	2.51000476834271e-06	4.85691526451219e-05	Intron (ENST00000295408.9/10461, intron 8 of 18)	MERTK
control_d65_vs_control_VPA_high_1B	chr2_112671735_112672357	20.3077952858731	2.18161250024917	0.000934182928887006	0.00750607134792056	Distal Intergenic	SLC20A1
control_d65_vs_control_VPA_high_1B	chr2_113305478_113306316	59.8142942182194	1.68405696723479	0.000185385768836331	0.00198059443027211	Distal Intergenic	PAX8
control_d65_vs_control_VPA_high_1B	chr2_114484694_114485821	26.1039613804161	1.98702451433135	0.00193413626742806	0.0134127297142807	Intron (ENST00000436732.5/57628, intron 1 of 4)	DPP10
control_d65_vs_control_VPA_high_1B	chr2_114843615_114844508	29.6100662032872	3.61505167032153	1.35543833278918e-08	4.5672956370553e-07	Intron (ENST00000436732.5/57628, intron 1 of 4)	DPP10-AS3
control_d65_vs_control_VPA_high_1B	chr2_115285004_115286051	27.2864944638211	3.94784493533797	1.68213301557388e-08	5.56042903813082e-07	Intron (ENST00000436732.5/57628, intron 2 of 4)	DPP10
control_d65_vs_control_VPA_high_1B	chr2_118224020_118225487	41.785954446039	2.28697329188988	0.000206704970016282	0.00217227101865495	Promoter (1-2kb)	THORLNC
control_d65_vs_control_VPA_high_1B	chr2_119255479_119256731	31.9544567970768	1.62881236226082	0.000219555206817264	0.00228359867777284	Intron (ENST00000393106.6/55240, intron 5 of 5)	STEAP3-AS1
control_d65_vs_control_VPA_high_1B	chr2_119536086_119537112	26.6978128738273	3.57791380490428	3.55064450533589e-08	1.0845951265104e-06	Distal Intergenic	CFAP221
control_d65_vs_control_VPA_high_1B	chr2_119638739_119639880	39.8514796336341	1.92582526830417	2.94045678652784e-06	5.57406141657644e-05	Promoter (<=1kb)	CFAP221
control_d65_vs_control_VPA_high_1B	chr2_120511374_120512768	37.3817639897324	1.80455082785171	5.17951247190162e-05	0.000673174529419547	Distal Intergenic	LINC01101
control_d65_vs_control_VPA_high_1B	chr2_120861392_120862227	24.7654052787209	2.20856603179319	5.00424229073056e-06	8.87917831497975e-05	Intron (ENST00000482119.5/2736, intron 2 of 3)	GLI2
control_d65_vs_control_VPA_high_1B	chr2_120892799_120894561	165.025852240647	1.28819172642247	6.69744576621755e-08	1.91715827643941e-06	Intron (ENST00000482119.5/2736, intron 2 of 3)	GLI2
control_d65_vs_control_VPA_high_1B	chr2_124001635_124002533	22.1553481893429	4.73029092319099	1.30769818532644e-08	4.41538622039437e-07	Distal Intergenic	LOC107985820
control_d65_vs_control_VPA_high_1B	chr2_124024549_124025732	46.892278207495	1.61024199648514	3.88641525589782e-05	0.000526461902420636	Promoter (<=1kb)	LOC107985820
control_d65_vs_control_VPA_high_1B	chr2_127874517_127875489	29.2679252777421	3.55734921396858	2.68313110935906e-06	5.14348931749486e-05	Intron (ENST00000272647.9/83607, intron 2 of 7)	AMMECR1L
control_d65_vs_control_VPA_high_1B	chr2_128368902_128370432	104.657760284908	1.3143510155005	3.21128941234595e-05	0.000446134015745707	Distal Intergenic	HS6ST1
control_d65_vs_control_VPA_high_1B	chr2_129922859_129924183	30.1666336650589	1.87566537576096	3.82275272589163e-05	0.000518750581031058	Promoter (<=1kb)	LINC01856
control_d65_vs_control_VPA_high_1B	chr2_130351412_130352579	42.9643942237828	1.59626177831546	0.000156935496632969	0.00172451703388985	Distal Intergenic	PTPN18
control_d65_vs_control_VPA_high_1B	chr2_130755231_130756798	66.1086703367964	1.1267882160428	0.00179152033775853	0.0126566400840207	Promoter (<=1kb)	AMER3
control_d65_vs_control_VPA_high_1B	chr2_130824322_130825058	38.1561717471976	2.59085654424827	1.55343620604365e-10	7.74953188012956e-09	Distal Intergenic	ARHGEF4
control_d65_vs_control_VPA_high_1B	chr2_130871895_130873057	27.4990500784711	1.77288528709143	0.00111475995664537	0.00865455225756231	Intron (ENST00000409359.6/50649, intron 1 of 12)	ARHGEF4
control_d65_vs_control_VPA_high_1B	chr2_132037271_132038847	33.9611097106806	1.71026455405162	0.0052946585337406	0.0294766107204472	Exon (ENST00000450396.1/ENST00000450396.1, exon 1 of 1)	LINC01945
control_d65_vs_control_VPA_high_1B	chr2_132588827_132590180	40.6371241968887	1.22256272319379	0.00086351362003711	0.00704415378728639	Intron (ENST00000329321.4/2863, intron 1 of 1)	GPR39
control_d65_vs_control_VPA_high_1B	chr2_132631848_132633011	48.765549111279	1.08004847677136	0.00604209108445712	0.0326042631509445	Intron (ENST00000329321.4/2863, intron 1 of 1)	GPR39
control_d65_vs_control_VPA_high_1B	chr2_133417228_133418520	41.7429534680998	1.8435906572752	0.000565770953398262	0.00499487052595792	Intron (ENST00000409261.6/344148, intron 3 of 19)	NCKAP5
control_d65_vs_control_VPA_high_1B	chr2_133496880_133497811	26.4369078690864	1.94322502180463	5.56645251868907e-05	0.00071655046092638	Intron (ENST00000409261.6/344148, intron 3 of 19)	NCKAP5
control_d65_vs_control_VPA_high_1B	chr2_133599410_133600915	46.4989992595267	1.40565136050727	0.000332900940915145	0.0032253934856705	Distal Intergenic	NCKAP5
control_d65_vs_control_VPA_high_1B	chr2_134522573_134523524	27.5432719485315	3.0320465769412	6.39822277341008e-09	2.29978383878147e-07	Intron (ENST00000281924.6/81615, intron 4 of 7)	TMEM163
control_d65_vs_control_VPA_high_1B	chr2_135960826_135961802	37.5604654177254	2.11166356245995	2.12965380153063e-07	5.40743811896478e-06	Exon (ENST00000264161.9/1615, exon 4 of 16)	DARS1
control_d65_vs_control_VPA_high_1B	chr2_136024701_136026118	167.156535428387	1.42561384167317	8.71061854829138e-11	4.557551089574e-09	Distal Intergenic	DARS-AS1
control_d65_vs_control_VPA_high_1B	chr2_136112283_136113103	25.2524475198762	3.14896167096782	8.45991355438766e-08	2.36561919962542e-06	Downstream (1-2kb)	CXCR4
control_d65_vs_control_VPA_high_1B	chr2_136117090_136118804	87.7391572241102	1.66978529599428	1.98153075087045e-08	6.44809384693146e-07	Promoter (<=1kb)	CXCR4
control_d65_vs_control_VPA_high_1B	chr2_136118912_136119652	34.8753510352469	1.66377522717911	0.000528973034956605	0.00472651988464632	Promoter (<=1kb)	CXCR4
control_d65_vs_control_VPA_high_1B	chr2_138724153_138725079	29.5172976633066	1.87170193637075	0.00083024970017557	0.00682474771065932	Intron (ENST00000272641.4/11249, intron 1 of 1)	NXPH2
control_d65_vs_control_VPA_high_1B	chr2_143162012_143162642	20.8668082145283	1.47012815043399	0.00395785623981171	0.0235604918252587	Exon (ENST00000549878.1/ENST00000549878.1, exon 3 of 4)	ARHGAP15
control_d65_vs_control_VPA_high_1B	chr2_143229495_143230878	27.5229383425324	2.14455127315818	0.00763490430320801	0.0390233227328676	Promoter (1-2kb)	ARHGAP15
control_d65_vs_control_VPA_high_1B	chr2_143346992_143347794	20.6101926129499	4.84581623874013	6.68317924656689e-09	2.39400727778279e-07	Intron (ENST00000552641.5/55843, intron 6 of 7)	ARHGAP15
control_d65_vs_control_VPA_high_1B	chr2_144430675_144432323	39.4388298167176	1.23154573486311	0.0011060474679065	0.00859706755477259	Promoter (<=1kb)	ZEB2
control_d65_vs_control_VPA_high_1B	chr2_144438661_144440189	26.162034719806	2.48300339391024	7.11823324192751e-06	0.000120754942034319	Intron (ENST00000637045.1/9839, intron 1 of 8)	ZEB2
control_d65_vs_control_VPA_high_1B	chr2_144461250_144461877	31.1932309497639	2.72917736215854	2.10196641736398e-07	5.34258061246767e-06	3' UTR	ZEB2
control_d65_vs_control_VPA_high_1B	chr2_144479163_144480748	30.970428870285	2.61466313404769	4.47373594016128e-07	1.05362640924199e-05	Promoter (1-2kb)	ZEB2
control_d65_vs_control_VPA_high_1B	chr2_144503974_144504934	21.6664799688631	1.7680358402547	0.00164110095668339	0.0118060956806571	Promoter (2-3kb)	ZEB2
control_d65_vs_control_VPA_high_1B	chr2_144510292_144511080	44.2163042868951	1.99324117269039	5.36525683273247e-06	9.45326576434406e-05	Promoter (2-3kb)	ZEB2
control_d65_vs_control_VPA_high_1B	chr2_144511914_144512435	25.8005774965097	3.71835024651346	1.3751448454948e-06	2.86237469322342e-05	3' UTR	ZEB2
control_d65_vs_control_VPA_high_1B	chr2_144567436_144568332	25.5907524857656	2.92035116588435	1.16113251818815e-06	2.46110710229383e-05	Intron (ENST00000413525.2/101928455, intron 2 of 2)	LOC105373656
control_d65_vs_control_VPA_high_1B	chr2_144580228_144581649	35.3530156299682	2.41230626716495	1.54237887456629e-07	4.04668411594224e-06	Distal Intergenic	LOC105373656
control_d65_vs_control_VPA_high_1B	chr2_144770203_144771754	36.5199206205903	3.79859008355821	4.13450318292013e-12	2.7509902253084e-10	Exon (ENST00000666826.1/401014, exon 2 of 2)	TEX41
control_d65_vs_control_VPA_high_1B	chr2_144989492_144991147	27.0426327903637	1.94326720011224	0.000226209017815434	0.00233986420015751	Intron (ENST00000653533.1/401014, intron 4 of 5)	TEX41
control_d65_vs_control_VPA_high_1B	chr2_146539851_146541345	43.0410550399374	3.34623149597001	2.31188969773053e-07	5.82269063403398e-06	Distal Intergenic	PABPC1P2
control_d65_vs_control_VPA_high_1B	chr2_148303024_148303695	26.0168050553999	4.4439896886416	1.71956763986756e-06	3.48185810804508e-05	Intron (ENST00000488372.5/55777, intron 2 of 3)	MBD5
control_d65_vs_control_VPA_high_1B	chr2_148864979_148866009	22.1282317029284	3.25675367340649	4.57895851663861e-08	1.3607588915591e-06	Distal Intergenic	KIF5C
control_d65_vs_control_VPA_high_1B	chr2_148876166_148877352	124.057960347977	2.88811555084304	3.18700660564606e-22	1.08231178672763e-19	Promoter (<=1kb)	KIF5C
control_d65_vs_control_VPA_high_1B	chr2_148887426_148888741	40.8461213153363	3.13597536795747	2.94071352010436e-08	9.15110017762602e-07	Exon (ENST00000601658.5/ENST00000601658.5, exon 1 of 4)	KIF5C
control_d65_vs_control_VPA_high_1B	chr2_148895956_148896760	22.8547956733794	1.66217482714181	0.00143868711068651	0.0106154095853319	Intron (ENST00000435030.6/3800, intron 1 of 25)	KIF5C
control_d65_vs_control_VPA_high_1B	chr2_148914067_148914986	25.2076954257612	1.51251007209066	0.000419872669569202	0.00390883749068053	Intron (ENST00000435030.6/3800, intron 1 of 25)	KIF5C
control_d65_vs_control_VPA_high_1B	chr2_150320519_150321648	20.305349358475	3.93419845629257	9.40795876344756e-08	2.60550006621036e-06	Intron (ENST00000659082.1/ENST00000659082.1, intron 2 of 4)	LINC01817
control_d65_vs_control_VPA_high_1B	chr2_150327457_150328485	79.4449576565931	1.9937010198013	0.00853274490934917	0.042444630485318	Intron (ENST00000659082.1/ENST00000659082.1, intron 3 of 4)	LINC01817
control_d65_vs_control_VPA_high_1B	chr2_150630744_150631369	20.222747833338	3.75418598815841	3.02128683139995e-07	7.40267262404442e-06	Promoter (<=1kb)	LINC02612
control_d65_vs_control_VPA_high_1B	chr2_151972937_151974253	45.607023985792	1.39854577293611	0.000285986703432418	0.00284503716857849	Promoter (<=1kb)	CACNB4
control_d65_vs_control_VPA_high_1B	chr2_152413030_152413942	21.7900483170766	2.4791264746097	1.64422821107927e-05	0.000249939238192624	Intron (ENST00000288670.14/114793, intron 1 of 25)	FMNL2
control_d65_vs_control_VPA_high_1B	chr2_152542888_152543605	21.3030271270999	1.39836676338165	0.00745153987317936	0.0383001925422548	Intron (ENST00000288670.14/114793, intron 3 of 25)	FMNL2
control_d65_vs_control_VPA_high_1B	chr2_153476894_153479405	149.436369410251	1.44310443515856	3.68659105674317e-10	1.71027968535612e-08	Promoter (<=1kb)	RPRM
control_d65_vs_control_VPA_high_1B	chr2_153487516_153488774	33.152017637754	3.35435551893958	2.39989026791825e-06	4.66694493560073e-05	Intron (ENST00000424322.1/ENST00000424322.1, intron 1 of 1)	RPRM
control_d65_vs_control_VPA_high_1B	chr2_153871181_153872523	132.069618679794	1.48897570224546	5.93886721861723e-09	2.15526929649093e-07	Promoter (<=1kb)	GALNT13
control_d65_vs_control_VPA_high_1B	chr2_156592771_156593849	42.2562765193323	1.97565869862769	4.91961192545435e-07	1.14541574269052e-05	Intron (ENST00000409861.5/2820, intron 17 of 18)	GPD2
control_d65_vs_control_VPA_high_1B	chr2_156630126_156631483	21.0086534286386	2.43857118125505	0.00133332645526243	0.00999899539352736	Distal Intergenic	GPD2
control_d65_vs_control_VPA_high_1B	chr2_157325569_157326612	28.625795350527	2.04098670427722	0.000154746826165374	0.00170428594169995	Promoter (<=1kb)	ERMN
control_d65_vs_control_VPA_high_1B	chr2_157890762_157892118	32.5262319047598	3.47932624363838	4.61930557926013e-10	2.10333506167928e-08	Intron (ENST00000605860.5/151531, intron 1 of 9)	UPP2
control_d65_vs_control_VPA_high_1B	chr2_159609803_159610496	28.3525083322427	1.5791753232423	0.000276383841547223	0.0027657458716377	Intron (ENST00000392783.7/29994, intron 1 of 36)	LOC643072
control_d65_vs_control_VPA_high_1B	chr2_159617599_159618112	31.1569136811524	3.97943435594879	7.88354935581399e-09	2.78594935274614e-07	Promoter (1-2kb)	BAZ2B
control_d65_vs_control_VPA_high_1B	chr2_160317008_160318158	109.283688889319	1.25126059569882	1.01595444690571e-06	2.18451574989609e-05	Promoter (<=1kb)	RBMS1
control_d65_vs_control_VPA_high_1B	chr2_160405344_160406052	48.5913499588917	1.69097703491276	0.00198141844373196	0.013675443724135	Promoter (1-2kb)	MIR4785
control_d65_vs_control_VPA_high_1B	chr2_160472706_160473832	29.2360396840297	1.51245642101048	0.00259377464248603	0.0169083911014068	Intron (ENST00000474820.5/5937, intron 1 of 15)	RBMS1
control_d65_vs_control_VPA_high_1B	chr2_161624142_161625243	37.4728094806862	1.80927247484142	7.10888944192809e-06	0.000120616960991625	Promoter (<=1kb)	SLC4A10
control_d65_vs_control_VPA_high_1B	chr2_161625308_161626009	22.0799451993112	1.90493232247765	0.000926900645806541	0.00745657530827082	Promoter (<=1kb)	SLC4A10
control_d65_vs_control_VPA_high_1B	chr2_162001903_162003213	35.0343773917943	2.05142528280591	4.09405438432865e-05	0.000550845953900094	Intron (ENST00000360534.8/1803, intron 23 of 25)	DPP4
control_d65_vs_control_VPA_high_1B	chr2_162475471_162476272	34.9401809686352	1.90624129899865	1.21323735139868e-05	0.000192436356661299	Intron (ENST00000618399.4/90134, intron 5 of 14)	KCNH7
control_d65_vs_control_VPA_high_1B	chr2_162768532_162769601	31.5601205319967	3.08911163507905	1.6842663628624e-07	4.3774675667688e-06	Promoter (<=1kb)	KCNH7-AS1
control_d65_vs_control_VPA_high_1B	chr2_162838153_162839740	62.7119984630983	1.79713592385213	3.79971571755681e-07	9.09859614933428e-06	Promoter (<=1kb)	KCNH7
control_d65_vs_control_VPA_high_1B	chr2_163717527_163718563	33.9161720186538	2.38221710494786	1.53523161291268e-07	4.02952312189191e-06	Intron (ENST00000409634.5/55137, intron 2 of 2)	FIGN
control_d65_vs_control_VPA_high_1B	chr2_165018049_165018701	24.9591981544254	2.48158187296906	2.5518958141189e-06	4.92697552504936e-05	Intron (ENST00000670672.1/101929633, intron 7 of 7)	SLC38A11
control_d65_vs_control_VPA_high_1B	chr2_165054447_165055863	21.6371788235226	2.71783346473524	3.41523028408787e-06	6.36035590631334e-05	Intron (ENST00000670672.1/101929633, intron 7 of 7)	SCN3A
control_d65_vs_control_VPA_high_1B	chr2_165572126_165572601	23.4289339292239	2.23091988173223	1.06795733670632e-05	0.000172146052594047	Promoter (<=1kb)	CSRNP3
control_d65_vs_control_VPA_high_1B	chr2_165573606_165574535	65.630569569157	1.26658220890502	5.73235060127291e-05	0.00073491617657814	Promoter (<=1kb)	CSRNP3
control_d65_vs_control_VPA_high_1B	chr2_165697676_165698966	56.0938232840236	2.10615437861128	2.44377635482916e-08	7.76593402247367e-07	Distal Intergenic	GALNT3
control_d65_vs_control_VPA_high_1B	chr2_165863681_165864787	38.3875308327796	2.72954759445152	3.47398751671341e-08	1.06378727420392e-06	Intron (ENST00000489714.5/100506124, intron 1 of 3)	LOC100506124
control_d65_vs_control_VPA_high_1B	chr2_165886690_165887246	21.6202612518777	2.72052250415822	0.00013960684650795	0.00156366257017495	Promoter (2-3kb)	TTC21B
control_d65_vs_control_VPA_high_1B	chr2_166375360_166376654	120.667381363959	1.79786021882339	4.38360675629604e-10	2.00666021707332e-08	Promoter (<=1kb)	SCN9A
control_d65_vs_control_VPA_high_1B	chr2_167945499_167947041	104.000292730198	2.63549261816029	8.84969287350362e-15	9.28989402612666e-13	Distal Intergenic	B3GALT1-AS1
control_d65_vs_control_VPA_high_1B	chr2_168660872_168662215	28.4836702042861	2.10605783630233	1.52472663330278e-05	0.00023445553489847	Intron (ENST00000305747.10/253782, intron 4 of 9)	MIR4774
control_d65_vs_control_VPA_high_1B	chr2_169285178_169286466	67.1894631136915	1.46171093032759	0.000906552721110043	0.00732734587830537	Intron (ENST00000649046.1/4036, intron 9 of 78)	LRP2
control_d65_vs_control_VPA_high_1B	chr2_169286605_169287270	25.8299567132604	2.80512558526777	0.000445990283067455	0.00411051731325373	Intron (ENST00000649046.1/4036, intron 9 of 78)	LRP2
control_d65_vs_control_VPA_high_1B	chr2_170235785_170237095	20.499024039339	1.7448462690403	0.00138306048220077	0.0102925887514389	Exon (ENST00000409940.6/140469, exon 7 of 30)	MYO3B
control_d65_vs_control_VPA_high_1B	chr2_170339001_170340084	21.4191965214924	4.11517641370409	3.59668927213762e-07	8.65820093761074e-06	Intron (ENST00000409940.6/140469, intron 8 of 29)	MYO3B-AS1
control_d65_vs_control_VPA_high_1B	chr2_170354290_170355271	25.9419340767187	2.33767839954079	0.000311037083866173	0.00305167824197195	Intron (ENST00000409940.6/140469, intron 8 of 29)	MYO3B-AS1
control_d65_vs_control_VPA_high_1B	chr2_171723601_171724774	30.1783632033807	1.58113228269916	0.000225516263235401	0.00233390951152135	Promoter (1-2kb)	DYNC1I2
control_d65_vs_control_VPA_high_1B	chr2_171963994_171964759	36.1449728479436	2.62543077097177	2.50710419751142e-07	6.26056862529265e-06	Promoter (<=1kb)	HAT1
control_d65_vs_control_VPA_high_1B	chr2_171965769_171966659	48.0764676585789	3.34437314589385	4.77661703157512e-15	5.21253736384987e-13	Promoter (<=1kb)	HAT1
control_d65_vs_control_VPA_high_1B	chr2_172071764_172073434	54.0403550162409	2.97009001136018	4.27428892672366e-12	2.83453892344196e-10	Promoter (1-2kb)	METAP1D
control_d65_vs_control_VPA_high_1B	chr2_172380500_172381693	59.2998931684899	1.24806990981795	0.000912167139462658	0.00736037112225584	Distal Intergenic	ITGA6
control_d65_vs_control_VPA_high_1B	chr2_172735317_172736615	37.0080401709418	1.41864463045205	0.00187743674580199	0.0131112105632736	Promoter (<=1kb)	RAPGEF4
control_d65_vs_control_VPA_high_1B	chr2_173249871_173251000	93.4760645771583	2.88733682895289	1.07210158015203e-22	3.89288090340595e-20	Intron (ENST00000409176.6/51776, intron 16 of 19)	MAP3K20-AS1
control_d65_vs_control_VPA_high_1B	chr2_173272674_173273463	23.1221504997846	3.04458641400634	4.21258851096387e-05	0.000564394562340617	Promoter (1-2kb)	MAP3K20-AS1
control_d65_vs_control_VPA_high_1B	chr2_173414673_173416460	36.2234624846636	2.02617011925081	7.3498135754241e-05	0.000907543818182198	Distal Intergenic	CDCA7
control_d65_vs_control_VPA_high_1B	chr2_173451381_173452906	60.0042947903522	1.80287217469626	2.5906481004688e-07	6.44255658977113e-06	Distal Intergenic	CDCA7
control_d65_vs_control_VPA_high_1B	chr2_174123967_174124745	44.4611315651951	1.90647044911507	0.0010178663820096	0.00804397033815981	Promoter (<=1kb)	OLA1
control_d65_vs_control_VPA_high_1B	chr2_175853007_175855041	56.9851722330412	2.585857249628	3.02041854675565e-14	2.93854736760152e-12	Distal Intergenic	LNPK
control_d65_vs_control_VPA_high_1B	chr2_177314727_177315837	22.5040549137027	2.56948174581342	7.52758876531328e-06	0.000126889456283624	Promoter (<=1kb)	LOC100130691
control_d65_vs_control_VPA_high_1B	chr2_177675214_177675871	21.0760537340344	3.82867176716234	7.43812862999936e-06	0.000125593866667445	Promoter (<=1kb)	PDE11A
control_d65_vs_control_VPA_high_1B	chr2_178211441_178212819	69.6615302064168	2.52622478159367	1.14238798183619e-12	8.36936694697234e-11	Intron (ENST00000392505.6/114880, intron 1 of 25)	OSBPL6
[truncated: 74,103 more rows]
